# Supplementary material for: Black Carbon Emission, Transport and Effect on Radiation Forcing Modelling During the Summer 2019–2020 Wildfires in Southeast Australia
Source: Preprints.org preprint supplement (doi:10.20944/preprints202302.0293.v1), 2023-02-17
Supplement: Supplementary file 1 [file supplementary]

## Sheet: dec2019_300
Date_time	Datetime (AEST)	dust_1	PM10	PM2.5	BC	NO2	NO	Temp2m	U	V	Temp2m(C)	Wsp(pred)	Wdr(pred)	PM2.5 (obs)	Temperature(obs)	Wsp(obs)	Wdr(obs)	PM10 (obs)	BC_obs (nanogrms/m3)		Date	Predicted PM₂ι₅	Observed PM₂ι₅	BC_avg_obs (nanograms/m3)	BC_avg_obs(micrograms/m3)	BC(micrograms/m3)	BC_avg_pred	BC_avg_pred_org	PM25_cor	PM25_IOA	PM25(P-O)^2	(P-O)+(O-O)^2	PM25_Obs_avg		PM25(P-O)^2	(P-O)+(O-O)^2	PM25_Obs_avg		Temp(P-O)^2	(P-O)+(O-O)^2	Temp_Obs_avg		Wsp(P-O)^2	(P-O)+(O-O)^2	Wsp_Obs_avg
2019-12-01_00:00:00	2019-12-01 10:00:00	0	0	0	0	0	0	293.65	-0.95	1.12	20.5	1.46864	139.695	3.4	19.1	1.3	179	21.1	319		2019-12-01	5.915	12.9214	189.714	0.189714	0	0.254312	0.328571	0.205049	0.400682	49.09	766.38	23.2613		11.56	2053.9	24.3584		1.96	25.3009	22.315		0.0284391	7.56999	2.75664
2019-12-01_01:00:00	2019-12-01 11:00:00	0	0.03	0.01	0	0	0	294.69	-0.21	3.49	21.54	3.49631	176.556	7.2	19.9	1.8	167.9	29.7	148		2019-12-02	34.6325	46.9458	832.708	0.832708	0	1.35352	1.74875	0.539896	0.704383	151.618	1229.09			51.6961	1723.08			2.6896	10.1761			2.87748	2.87748
2019-12-01_02:00:00	2019-12-01 12:00:00	0	0.22	0.07	0	0	0	294.07	-0.54	3.88	20.92	3.9174	172.077	11.6	20	2.2	169.6	27.6	158		2019-12-03	92.4312	36.3375	2360.5	2.3605	0	3.76903	4.86958			3146.51	6764.86			132.941	1372.7			0.8464	13.7641			2.94945	2.94945
2019-12-01_03:00:00	2019-12-01 13:00:00	0	0.27	0.08	0	0	0	294.98	-2.34	1.76	21.83	2.928	126.948	8.4	20.4	2.9	157.3	28.5	132		2019-12-04	19.9713	65.5625	2859.79	2.85979	0	0.464719	0.600417	Temp_cor	Temp_IOA	2078.56	2078.56			69.2224	1619.26			2.0449	5.76			0.000784153	0.0948657
2019-12-01_04:00:00	2019-12-01 14:00:00	0	0.24	0.07	0	0	0	295.61	-3.9	-1.16	22.46	4.06886	73.4358	6	20.7	3.9	138.1	37.5	141		2019-12-05	45.2671	92.8708	5848.08	5.84808	0	1.75793	2.27125	0.775057	0.630055	2266.12	8393.84			35.1649	1819.02			3.0976	3.0976			0.0285128	5.9969
2019-12-01_05:00:00	2019-12-01 15:00:00	0	0.19	0.06	0	0	0	296.4	-3.18	-2.68	23.25	4.1587	49.877	4.2	21.8	4.6	109.4	44.1	161		2019-12-06	41.7283	44.5333	2980.62	2.98062	0	1.7273	2.23167			7.86802	1579.4			17.1396	1976.69			2.1025	2.1025			0.194744	10.4892
2019-12-01_06:00:00	2019-12-01 16:00:00	0	0.54	0.38	0.02	0	0	298.7	-1.83	-2.91	25.55	3.43759	32.1645	2.2	21.9	4.3	86.5	40.6	192		2019-12-07	18.2237	21.8667	1067.12	1.06713	0.0154799	0.579528	0.74875	Wsp_cor	Wsp_IOA	13.2708	41.3395			3.3124	2128.9			13.3225	13.3225			0.743757	4.91769
2019-12-01_07:00:00	2019-12-01 17:00:00	0	1.38	1.1	0.06	0	0	300.62	2.31	-2.13	27.47	3.14213	312.679	14	21.6	3.8	71	40.4	284		2019-12-08	28.9517	14.9875	573.5	0.5735	0.0464396	1.01909	1.31667	0.405114	0.546704	194.998	194.998			166.41	1130.3			34.4569	34.4569			0.432789	2.02246
2019-12-01_08:00:00	2019-12-01 18:00:00	0	1.84	1.5	0.08	0	0	299.41	2.55	-2.02	26.26	3.25314	308.385	14.7	22	2.5	56.5	44	198		2019-12-09	35.3975	15.3	324.792	0.324792	0.0619195	1.36965	1.76958			403.91	403.91			174.24	1057.55			18.1476	18.1476			0.567215	0.567215
2019-12-01_09:00:00	2019-12-01 19:00:00	0	1.76	1.59	0.09	0	0	296.77	3.9	-1.99	23.62	4.37837	297.033	20.9	21.3	0.7	188.8	58.4	186		2019-12-10	28.6792	73.1	2233.25	2.23325	0.0696594	0.448594	0.579583	BC_cor		1973.21	3053.58			372.876	688.013			5.3824	5.3824			13.5304	13.5304
2019-12-01_10:00:00	2019-12-01 20:00:00	0	0.82	0.75	0.04	0	0	296.35	4.93	-1.67	23.2	5.20517	288.713	25.4	20.3	0.4	231.5	48.8	153		2019-12-11	14.4821	14.6375	965.792	0.965792	0.0309598	0.00515996	0.00666667	0.580736		0.0241543	302.775			607.622	607.622			8.41	8.41			23.0897	23.0897
2019-12-01_11:00:00	2019-12-01 21:00:00	0	2.93	2.68	0.15	0	0	294.86	3.84	-0.71	21.71	3.90509	280.475	20.6	21.6	0.6	322.4		198		2019-12-12	12.5625	9.51667	450.042	0.450042	0.116099	0.0212848	0.0275			9.2771	597.354			321.126	647.194			0.0121	1.7424			10.9236	10.9236
2019-12-01_12:00:00	2019-12-01 22:00:00	0	50.42	45.43	2.55	0.01	0	292.6	5.71	4.8	19.45	7.4595	229.949	21.6	21.1	0.3	248.5	55	177		2019-12-13	9.27667	3.2375	271.583	0.271583	1.97368	0.0203173	0.02625			36.4715	1156.4			567.869	567.869			2.7225	16.6464			51.2584	51.2584
2019-12-01_13:00:00	2019-12-01 23:00:00	0	32.18	29.09	1.61	0	0	290.6	1.76	0.72	17.45	1.90158	247.751	20.7	20.2	1.4	221.3	82.2	209		2019-12-14	11.0321	10.4417	418.583	0.418583	1.24613	0.0474071	0.06125			0.348592	627.315			70.3921	70.3921			7.5625	48.7204			0.251581	4.92139
2019-12-01_14:00:00	2019-12-02 00:00:00	0	38.7	35.3	1.94	0	0	289.58	0.42	-3.46	16.43	3.4854	353.079	17	19.8	0.9	202.8	9.3	316		2019-12-15	7.7125	9.20417	401.25	0.40125	1.50155	0.060952	0.07875			2.22507	876.357			334.89	334.89			11.3569	70.56			6.68428	6.68428
2019-12-01_15:00:00	2019-12-02 01:00:00	0	14.78	13.53	0.74	0	0	288.46	-0.02	-2.87	15.31	2.87007	0.399344	23	18.4	0.3	308.3	59.3	395		2019-12-16	11.9138	21.8208	958.875	0.958875	0.572755	0.180276	0.232917			98.1503	163.467			89.6809	148.596			9.5481	119.246			6.60526	6.60526
2019-12-01_16:00:00	2019-12-02 02:00:00	0	4.36	3.99	0.22	0	0	287.6	-0.46	-2.43	14.45	2.47316	10.7194	35	17.6	1.2	328.2	87	382		2019-12-17	9.3875	5.7875	137.458	0.137458	0.170279	0	0			12.96	982.509			961.62	961.62			9.9225	158.256			1.62093	3.41083
2019-12-01_17:00:00	2019-12-02 03:00:00	0	2.62	2.4	0.13	0	0	286.87	-0.58	-2.4	13.72	2.46909	13.5861	31.7	18.6	3.2	328.9	70.2	734		2019-12-18	6.95125	6.85	317.667	0.317667	0.100619	0.0119324	0.0154167			0.0102516	1070.52			858.49	858.49			23.8144	151.536			0.534231	0.534231
2019-12-01_18:00:00	2019-12-02 04:00:00	0	0.49	0.43	0.02	0	0	286.68	-0.09	-2.28	13.53	2.28178	2.26058	28.8	18.5	5.6	318	57.8	1015		2019-12-19	33.7425	41.3208	1504.62	1.50463	0.0154799	1.11358	1.43875			57.4311	814.722			804.857	804.857			24.7009	158.76			11.0106	11.0106
2019-12-01_19:00:00	2019-12-02 05:00:00	0.01	0.46	0.39	0.02	0	0	286.66	0.02	-1.87	13.51	1.87011	359.387	37.5	17.8	3.8	315.5	35.4	852		2019-12-20	29.7971	11.8917	714.167	0.714167	0.0154799	0.428922	0.554167			320.604	320.604			1377.15	1377.15			18.4041	177.422			3.72449	3.72449
2019-12-01_20:00:00	2019-12-02 06:00:00	0.07	1.38	0.57	0.02	0	0	289.92	2.33	-0.95	16.77	2.51623	292.182	30.4	18.1	1.6	308.1	34.2	843		2019-12-21	35.8987	28.2667	726.958	0.726958	0.0154799	0.745937	0.96375			58.2487	311.361			889.829	889.829			1.7689	95.2576			0.839473	1.97058
2019-12-01_21:00:00	2019-12-02 07:00:00	2.27	19.05	3.97	0.02	0	0	291.82	5.58	-0.91	18.67	5.65372	279.262	18.4	19.3	3.6	310.4	21.6	1051		2019-12-22	18.4792	15.3167	382.25	0.38225	0.0154799	0.273478	0.353333			10.0014	161.904			208.225	694.323			0.3969	44.3556			4.21775	13.9406
2019-12-01_22:00:00	2019-12-02 08:00:00	5.89	45.55	9.61	0.01	0	0	293.3	7.4	-2.19	20.15	7.71726	286.486	9.3	20.3	5	315.2	25.3	1060		2019-12-23	9.72625	10.9167	147.708	0.147708	0.00773994	0.0316047	0.0408333			1.41709	669.623			0.0961	888.636			0.0225	17.4724			7.3835	51.8005
2019-12-01_23:00:00	2019-12-02 09:00:00	4.84	38.25	7.99	0.01	0	0	294.19	8.36	-2.37	21.04	8.68945	285.828	6	20	3.1	303.6	21.1	364		2019-12-24	5.36417	9.22917	271.375	0.271375	0.00773994	0.0151574	0.0195833			14.9382	1019.31			3.9601	1206.17			1.0816	12.8881			31.2419	39.306
2019-12-02_00:00:00	2019-12-02 10:00:00	3.83	29.35	6.3	0	0	0	295.21	8.9	-2.2	22.06	9.16788	283.885	22.2	20.2	3.8	307.5	55.2	1425		2019-12-25	6.63625	10.5708	311.208	0.311208	0	0	0			15.4809	859.247			252.81	408.848			3.4596	5.6169			28.8141	55.4709
2019-12-02_01:00:00	2019-12-02 11:00:00	2.3	17.89	4	0	0	0	295.67	9.3	-2.24	22.52	9.56596	283.542	34.1	21	3.3	299.5	79.8	2510		2019-12-26	4.45083	8.69583	410.375	0.410375	0	0	0			18.02	1113.78			906.01	906.01			2.3104	2.3104			39.2623	53.9631
2019-12-02_02:00:00	2019-12-02 12:00:00	0.39	5.11	1.71	0.02	0	0	296.27	9.76	-2.03	23.12	9.96888	281.75	53.9	22	4.5	302.8	60.4	1739		2019-12-27	6.59792	4.77083	192.333	0.192333	0.0154799	0.0793344	0.1025			3.33823	1235.61			2723.8	2723.8			1.2544	1.2544			29.9086	80.0824
2019-12-02_03:00:00	2019-12-02 13:00:00	0.13	3.12	1.35	0.03	0	0	296.67	9.73	-1.39	23.52	9.82878	278.13	15.5	21.8	4.8	307.5	15.9	356		2019-12-28	9.06167	11.1167	243.833	0.243833	0.0232198	0.177051	0.22875			4.22303	693.883			200.222	1015.7			2.9584	2.9584			25.2887	82.97
2019-12-02_04:00:00	2019-12-02 14:00:00	0.04	13.61	10.75	0.57	0	0	296.82	9.75	-0.83	23.67	9.78526	274.866		21.7	3.5	294	48.1	230		2019-12-29	13.4621	15.8625	473.5	0.4735	0.441176	0.325722	0.420833			5.762	295.682			115.562	1441.72			3.8809	3.8809			39.5045	60.2993
2019-12-02_05:00:00	2019-12-02 15:00:00	0.03	61.12	48.98	2.64	0.01	0	296.57	9.62	0.34	23.42	9.62601	267.976	30	21.5	4.2	301	48	592		2019-12-30	13.2983	15.6042	508.917	0.508917	2.04334	0.304438	0.393333			5.31687	310.376			360.24	915.668			3.6864	3.6864			29.4415	68.9897
2019-12-02_06:00:00	2019-12-02 16:00:00	0.08	83.35	67.96	3.73	0.01	0	295.78	9.28	1.58	22.63	9.41354	260.338	34.7	21.3	4.3	298	96.5	485		2019-12-31	13.2204	32.1958	1186.12	1.18613	2.887	0.320562	0.414167			360.066	360.066			1106.23	2909.52			1.7689	1.7689			26.1483	67.1342
2019-12-02_07:00:00	2019-12-02 17:00:00	0	91.56	73.59	3.98	0.01	0	295.08	9	2.25	21.93	9.27699	255.964	98.7	21.3	2.8	288.2	203.4	367		2020-01-01	30.82	22.6818	718.636	0.718636	3.0805	0.387701	0.500909			66.23	66.23			630.512	15269.5			0.3969	1.96			41.9514	42.9941
2019-12-02_08:00:00	2019-12-02 18:00:00	0	97.73	77.38	4.14	0.01	0	293.82	7.17	1.62	20.67	7.35073	257.268	133.2	20.9	2.2	265.6	126.6	406							3.20433					11385.7	38515			3115.87	26198.7			0.0529	9.3636			26.5301	26.5301
2019-12-02_09:00:00	2019-12-02 19:00:00	0	143.25	117.9	6.41	0.01	0.01	292.13	6.1	0.82	18.98	6.15487	262.344	79	20	1.9	269.8	130.1	1514							4.9613									1513.21	21957.3			1.0404	31.9225			18.1039	18.1039
2019-12-02_10:00:00	2019-12-02 20:00:00	0	158.57	129.82	6.96	0.01	0.01	291.24	6.07	0.64	18.09	6.10365	263.981	82.9	19.2	2.1	273.8	210.7	1206							5.387									2201.49	26896			1.2321	53.8756			16.0292	16.0292
2019-12-02_11:00:00	2019-12-02 21:00:00	0	159.22	128.17	6.73	0.01	0.01	290.38	5.77	0.68	17.23	5.80993	263.279	94.3	18.5	2	273.3	184.7	888							5.20898									1147.18	30189.1			1.6129	79.21			14.5156	14.5156
2019-12-02_12:00:00	2019-12-02 22:00:00	0	90.34	65.34	3.1	0.01	0	289.29	5.06	0.08	16.14	5.06063	269.094	96.9	17.8	1.8	294.6	178.2								2.39938									996.034	12886.8			2.7556	114.276			10.6317	10.6317
2019-12-02_13:00:00	2019-12-02 23:00:00	0	40.44	19.75	0.53	0	0	288.44	4.89	-0.29	15.29	4.89859	273.394	114.2	17	1.7	300.9	178.3	1255							0.410217									8920.8	8920.8			2.9241	152.276			10.231	10.231
2019-12-02_14:00:00	2019-12-03 00:00:00	0	37.65	17.08	0.38	0	0	287.47	4.4	-0.55	14.32	4.43424	277.125	115.8	16.4	1.6	303.9	134.3	736							0.294118									9745.64	9745.64			4.3264	193.488			8.03293	8.03293
2019-12-02_15:00:00	2019-12-03 01:00:00	0	37.78	17.22	0.39	0	0	286.36	3.99	-0.87	13.21	4.08375	282.301	95	15.6	1.6	311.5	84.2	3990							0.301858									6049.73	6049.73			5.7121	250.272			6.16901	6.16901
2019-12-02_16:00:00	2019-12-03 02:00:00	0	34.31	13.94	0.2	0	0	285.34	3.57	-1.13	12.19	3.74457	287.564	50.2	15	2.2	316.8	50.2	8196							0.154799									1314.79	1314.79			7.8961	304.154			2.38569	2.38569
2019-12-02_17:00:00	2019-12-03 03:00:00	0	31.68	11.04	0.03	0	0	284.65	3.43	-1.35	11.5	3.68611	291.484	24.4	14.5	3	319.2	72.4	3116							0.0232198									178.49	178.49			9	347.077			0.470746	1.35981
2019-12-02_18:00:00	2019-12-03 04:00:00	0	32.46	11.29	0.03	0	0	284.24	3.5	-1.62	11.09	3.85673	294.837	12.3	14.5	2.9	313.1	101.2	2149							0.0232198									1.0201	631.517			11.6281	362.522			0.915341	1.52951
2019-12-02_19:00:00	2019-12-03 05:00:00	0	33.74	11.61	0.02	0	0	283.91	3.52	-1.51	10.76	3.83021	293.218	9.9	14.3	2.5	315.2	86.8	5201							0.0154799									2.9241	740.384			12.5316	382.985			1.76946	1.76946
2019-12-02_20:00:00	2019-12-03 06:00:00	0	35.43	12.3	0.02	0	0	287.02	3.41	-1.67	13.87	3.79697	296.093	10.7	15.1	3.4	315	72.4	4121							0.0154799									2.56	661.518			1.5129	245.236			0.157587	2.81224
2019-12-02_21:00:00	2019-12-03 07:00:00	0	36.29	12.76	0.03	0	0	290.21	4.47	-1.63	17.06	4.75792	290.035	8.4	16.4	4	313.3	63.8	4811							0.0232198									19.0096	759.554			0.4356	124.769			0.574442	10.4841
2019-12-02_22:00:00	2019-12-03 08:00:00	0	36.79	13.71	0.08	0	0	292.22	4.94	-1.58	19.07	5.18652	287.736	14.4	18.3	3.6	315.9	68.1	6416							0.0619195									0.4761	424.772			0.5929	52.7076			2.51705	10.6702
2019-12-02_23:00:00	2019-12-03 09:00:00	0	31.81	11.6	0.03	0	0	294.01	5.08	-1.81	20.86	5.39282	289.611	23.8	20	4.2	313.3	76.5	5055							0.0232198									148.84	177.422			0.7396	14.2129			1.42282	16.5879
2019-12-03_00:00:00	2019-12-03 10:00:00	0	29.37	10.69	0.02	0	0	295.81	5.53	-2.17	22.66	5.94052	291.425	38.1	21.7	5.4	319.7	64.8	2406							0.0154799									751.308	751.308			0.9216	0.9216			0.292164	33.8785
2019-12-03_01:00:00	2019-12-03 11:00:00	0	29.26	10.58	0.01	0	0	297.7	5.57	-2.58	24.55	6.13851	294.853	29.3	23.7	5.8	316.7	48	722							0.00773994									350.438	350.438			0.7225	13.1044			0.114589	41.1973
2019-12-03_02:00:00	2019-12-03 12:00:00	0	26.43	9.87	0.02	0	0	299.64	6.03	-2.84	26.49	6.66532	295.219	23.7	25.6	5.7	317.6	45.9	463							0.0154799									191.269	229.523			0.7921	55.6516			0.931844	46.8584
2019-12-03_03:00:00	2019-12-03 13:00:00	0	23.34	9.18	0.05	0	0	300.92	6.13	-2.67	27.77	6.68624	293.536	14.3	27.3	5.8	317	47.5	491							0.0386997									26.2144	637.058			0.2209	108.994			0.785421	48.5285
2019-12-03_04:00:00	2019-12-03 14:00:00	0	24.19	11.17	0.22	0	0	301.67	6.06	-2.47	28.52	6.54404	292.175	18.6	28.1	6.9	319.7	70.7	536							0.170279									55.2049	359.102			0.1764	143.76			0.126705	62.7905
2019-12-03_05:00:00	2019-12-03 15:00:00	0	28.77	16.58	0.58	0	0	302.03	5.86	-2.23	28.88	6.26997	290.834	19.1	28.7	6.7	319.1	50.9	582							0.448916									6.3504	170.042			0.0324	167.702			0.184927	55.502
2019-12-03_06:00:00	2019-12-03 16:00:00	0	82.98	67.29	3.6	0.01	0	301.83	5.94	-1.59	28.68	6.14912	284.985	20.9	29.1	5.5	316.6	51.8	572							2.78638									2152.03	2152.03			0.1764	172.923			0.421359	37.5661
2019-12-03_07:00:00	2019-12-03 17:00:00	0	158.64	136.86	7.71	0.02	0.01	301.02	5.05	-0.53	27.87	5.07774	275.991	25.5	28.8	5	314.3	56.4	897							5.96749									12401	12914			0.8649	144.962			0.00604284	20.773
2019-12-03_08:00:00	2019-12-03 18:00:00	0	307.98	273.39	15.71	0.03	0.02	298.62	3.14	-0.11	25.47	3.14193	272.006	28.1	28.1	4.5	315.1	50.8	1552							12.1594									60167.2	63892.7			6.9169	79.9236			1.84436	4.50257
2019-12-03_09:00:00	2019-12-03 19:00:00	0	653.32	589.18	34.19	0.07	0.03	296.11	3.63	0.85	22.96	3.72819	256.821	23.6	27.1	3	315.1	49.2	1081							26.4628									319881	319881			17.1396	29.4849			0.530261	1.45972
2019-12-03_10:00:00	2019-12-03 20:00:00	0	395.55	355.71	20.43	0.04	0.02	295.7	4.57	1.43	22.55	4.78851	252.625	28.1	25.8	2	311.1	45	1456							15.8127									107328	112285			10.5625	13.8384			7.77577	7.77577
2019-12-03_11:00:00	2019-12-03 21:00:00	0	315.14	281.87	15.96	0.03	0.02	294.67	4.25	1.23	21.52	4.42441	253.859	23.3	23.2	0.6	283.6	51.7	514							12.3529									66858.4	66858.4			2.8224	2.8224			14.6261	14.6261
2019-12-03_12:00:00	2019-12-03 22:00:00	0	281.89	252.24	14.03	0.03	0.01	292.96	3.81	-0.27	19.81	3.81955	274.054	57.1	22.3	0.5	246.1	173.1	875							10.8591									38079.6	67922.8			6.2001	6.3504			11.0194	11.0194
2019-12-03_13:00:00	2019-12-03 23:00:00	0	73.72	61.19	3.13	0.01	0	292.2	4.02	-0.44	19.05	4.04401	276.246	157.5	21.2	0.4	262.2	225.9	714							2.4226									9275.62	28889.8			4.6225	19.1844			13.2788	13.2788
2019-12-03_14:00:00	2019-12-04 00:00:00	0	32.46	23.27	0.98	0	0	290.44	3.41	-1.34	17.29	3.66384	291.453	186.1	20.7	0.5	259.1	85.1	802							0.758514									26513.6	26513.6			11.6281	44.0896			10.0099	10.0099
2019-12-03_15:00:00	2019-12-04 01:00:00	0	17.63	9.19	0.17	0	0	289.56	3.24	-1.58	16.41	3.60472	295.996	76.2	21.7	1.3	267.4	8.7	1138							0.131579									4490.34	4490.34			27.9841	42.5104			5.31173	5.31173
2019-12-03_16:00:00	2019-12-04 02:00:00	0	16.53	7.64	0.06	0	0	289.16	3.39	-1.83	16.01	3.8524	298.361	15.9	21.1	0.7	258.3	16.2	1392							0.0464396									68.2276	634.032			25.9081	56.5504			9.93764	9.93764
2019-12-03_17:00:00	2019-12-04 03:00:00	0	17.04	7.74	0.05	0	0	288.83	3.77	-1.7	15.68	4.13557	294.272	15.3	18.6	0.4	292	26.6	1164							0.0386997									57.1536	659.462			8.5264	107.122			13.9544	13.9544
2019-12-03_18:00:00	2019-12-04 04:00:00	0	18.52	8.59	0.07	0	0	288.33	4.21	-1.41	15.18	4.43984	288.517	18.4	16.6	0.7	284.9	55.9	1099							0.0541796									96.2361	472.193			2.0164	165.122			13.9864	13.9864
2019-12-03_19:00:00	2019-12-04 05:00:00	0	23.98	12.85	0.27	0	0	287.69	4.21	-1.23	14.54	4.386	286.286	40	15	0.4	216.4	71.7	1018							0.208978									737.122	737.122			0.2116	227.708			15.8882	15.8882
2019-12-03_20:00:00	2019-12-04 06:00:00	0	34.6	21.56	0.71	0	0	290.03	3.93	-0.78	16.88	4.00666	281.226	58.2	16.4	0.5	177.5	66.9	1654							0.549536									1342.49	1342.49			0.2304	128.823			12.2966	12.2966
2019-12-03_21:00:00	2019-12-04 07:00:00	0	45.21	30.43	1.18	0	0	293.37	3.48	0.17	20.22	3.48415	267.203	42.4	19.5	2.4	316	40	10957							0.913313									143.281	581.292			0.5184	24.1081			1.17538	1.17538
2019-12-03_22:00:00	2019-12-04 08:00:00	0	38.17	22.98	0.71	0	0	294.98	2.67	2.37	21.83	3.57013	228.406	26.1	22.1	4.2	311.9	43	13768							0.549536									9.7344	9.7344			0.0729	0.49			0.396741	5.06307
2019-12-03_23:00:00	2019-12-04 09:00:00	0	36.85	22.43	0.7	0	0	295.87	1.88	1.67	22.72	2.51462	228.385	24	24.4	4.1	313.5	73.8	4523							0.541796									2.4649	5.2441			2.8224	6.2001			2.51344	2.51344
2019-12-04_00:00:00	2019-12-04 10:00:00	0	34.72	21.62	0.7	0	0	296.94	1.25	1.69	23.79	2.10205	216.488	51.8	25.8	3.9	315.5	66.8	480							0.541796									910.832	910.832			4.0401	24.6016			3.23264	3.23264
2019-12-04_01:00:00	2019-12-04 11:00:00	0	31.94	20.38	0.69	0	0	297.62	0.48	2.35	24.47	2.39852	191.544	53.6	27.3	3.9	313.6	72.7	522							0.534056									1103.57	1103.57			8.0089	50.9796			2.25444	2.25444
2019-12-04_02:00:00	2019-12-04 12:00:00	0	29.45	17.86	0.54	0	0	297.62	-1.59	2.8	24.47	3.21995	150.41	58.5	28.2	4.9	317.3	90.5	1308							0.417957									1651.61	1651.61			13.9129	64.6416			2.82256	6.75976
2019-12-04_03:00:00	2019-12-04 13:00:00	0	28.71	16.97	0.48	0	0	297.03	-3.29	2.78	23.88	4.30726	130.197	63.1	29.6	5	320.8	79.2	2785							0.371517									2127.98	2127.98			32.7184	78.3225			0.479887	14.3433
2019-12-04_04:00:00	2019-12-04 14:00:00	0	27.49	16.22	0.46	0	0	296.92	-4.3	1.4	23.77	4.52217	108.034	60.7	30.8	5.4	322.3	76.5	4296							0.356037									1978.47	1978.47			49.4209	98.8036			0.77059	19.3791
2019-12-04_05:00:00	2019-12-04 15:00:00	0	26	13.6	0.26	0	0	296.33	-4.88	0.87	23.18	4.95694	100.108	56.3	31.7	2.7	306.9	150.1	4547							0.201238									1823.29	1823.29			72.5904	105.063			5.0938	5.0938
2019-12-04_06:00:00	2019-12-04 16:00:00	0	32.11	15.95	0.26	0	0	295.65	-4.91	-0.34	22.5	4.92176	86.0389	187.4	31.4	1.4	280.8	326.1	2223							0.201238									29395.1	29395.1			79.21	85.9329			12.4028	12.4028
2019-12-04_07:00:00	2019-12-04 17:00:00	0	39.58	18.22	0.21	0	0	295.11	-4.57	-1.59	21.96	4.8387	70.8163	248.3	27.1	1.5	119.3	313.9	1401							0.162539									52936.8	52936.8			26.4196	26.4196			11.1469	11.1469
2019-12-04_08:00:00	2019-12-04 18:00:00	0	43.73	19.64	0.2	0	0	294.37	-3.92	-2	21.22	4.40073	62.9693	150.2	23.5	2.8	102.6	88.7	2440							0.154799									17045.9	17045.9			5.1984	5.1984			2.56233	2.82484
2019-12-04_09:00:00	2019-12-04 19:00:00	0	35.97	16.75	0.2	0	0	293.28	-2.91	-2.23	20.13	3.6662	52.5363	49.3	21.9	2.4	104.8	69.3	1970							0.154799									1059.5	1059.5			3.1329	6.76			1.60325	1.60325
2019-12-04_10:00:00	2019-12-04 20:00:00	0	27.03	13.36	0.19	0	0	292.57	-2.61	-2.66	19.42	3.72662	44.4565	16.8	21.3	0.1	174.6	48.3	1923							0.147059									11.8336	344.474			3.5344	15.2881			13.1524	13.1524
2019-12-04_11:00:00	2019-12-04 21:00:00	0	26.22	13.58	0.21	0	0	291.22	-1.64	-2.49	18.07	2.98156	33.3704	18.2	19.9	0.8	221.7	71.4	2811							0.162539									21.3444	286.964			3.3489	44.3556			4.7592	4.7592
2019-12-04_12:00:00	2019-12-04 22:00:00	0	40.4	28.36	1.1	0	0	289.2	-0.27	-2.14	16.05	2.15697	7.19099	25.1	19.6	0.6	257.4	41.8	2450							0.851393									10.6276	22.4676			12.6025	80.6404			2.42414	7.63436
2019-12-04_13:00:00	2019-12-04 23:00:00	0	96.09	80.12	4.01	0.01	0	288.2	2.22	-0.39	15.05	2.254	279.964	31.6	19.1	1.2	311.7	48.9	1964							3.10372									2354.19	3969			16.4025	109.83			1.11091	4.26837
2019-12-04_14:00:00	2019-12-05 00:00:00	0	129.02	112.65	5.88	0.01	0.01	288.33	2.65	1.01	15.18	2.83595	249.137	39.3	18.2	0.9	318.1	52.4	7284							4.55108									5380.22	10656.4			9.1204	126.562			3.74789	3.74789
2019-12-04_15:00:00	2019-12-05 01:00:00	0	73.5	62.42	3.15	0.01	0	287.96	2.95	0.64	14.81	3.01863	257.759	41.8	17	0.7	328.9	55.5	17329							2.43808									425.184	3080.25			4.7961	164.352			5.37602	5.37602
2019-12-04_16:00:00	2019-12-05 02:00:00	0	40.93	31.83	1.48	0	0	287.27	3.08	0.02	14.12	3.08006	269.628	65.6	16.5	0.6	331.9	79.5	9829							1.14551									1140.41	2372.66			5.6644	196.28			6.15072	6.15072
2019-12-04_17:00:00	2019-12-05 03:00:00	0	47.6	37.6	1.77	0	0	286.29	3.19	-1.16	13.14	3.39436	289.983	102.4	16.3	0.5	330.2	109.1	1307							1.36997									4199.04	8332.04			9.9856	230.736			8.37734	8.37734
2019-12-04_18:00:00	2019-12-05 04:00:00	0	38.93	29.32	1.31	0	0	285.9	3.47	-1.43	12.75	3.75311	292.397	116.2	15.8	0.5	329.2	123.1	897							1.01393									7548.13	9370.24			9.3025	258.566			10.5827	10.5827
2019-12-04_19:00:00	2019-12-05 05:00:00	0	31.09	22.45	0.93	0	0	285.98	3.59	-1.41	12.83	3.85697	291.443	106.6	14.4	0.4	312.3	113.7	760							0.719814									7081.22	7081.22			2.4649	302.76			11.9506	11.9506
2019-12-04_20:00:00	2019-12-05 06:00:00	0	23.17	15.69	0.56	0	0	289.34	3.22	-1.7	16.19	3.64121	297.832	107.4	15.4	0.9	320	116	942							0.433437									8410.72	8410.72			0.6241	170.042			7.51422	7.51422
2019-12-04_21:00:00	2019-12-05 07:00:00	0	18.16	11.4	0.34	0	0	293.33	3.12	-1.85	20.18	3.62724	300.666	119.8	18.3	1.5	326.1	149.5	1001							0.263158									11750.6	11750.6			3.5344	37.8225			4.52517	4.52517
2019-12-04_22:00:00	2019-12-05 08:00:00	0	17.2	10.37	0.28	0	0	296.72	3	-1.89	23.57	3.54572	302.211	145.3	21.7	3.5	316.5	151.6	1419							0.216718									18206.1	18206.1			3.4969	3.4969			0.00208993	2.32781
2019-12-04_23:00:00	2019-12-05 09:00:00	0	16.06	9.01	0.2	0	0	298.88	2.47	-1.51	25.73	2.895	301.439	122.5	24	3.9	314.3	110.8	1683							0.154799									12880	12880			2.9929	26.01			1.01003	1.62561
2019-12-05_00:00:00	2019-12-05 10:00:00	0	13.99	7.65	0.15	0	0	300.37	1.68	-1.12	27.22	2.01911	303.69	109.6	26.4	4	321.7	129.9	2604							0.116099									10393.8	10393.8			0.6724	80.8201			3.92393	3.92393
2019-12-05_01:00:00	2019-12-05 11:00:00	0	12.23	6.85	0.14	0	0	301.33	0.62	-0.68	28.18	0.920217	317.643	108.3	28.3	4.6	324		6386							0.108359									10292.1	10292.1			0.0144	140.423			13.5408	13.5408
2019-12-05_02:00:00	2019-12-05 12:00:00	0	11.73	6.94	0.17	0	0	302.01	-1.07	-0.85	28.86	1.36653	51.5368	111.4	30.2	4.6	323.3	172	8166							0.131579									10911.9	10911.9			1.7956	208.225			10.4553	10.4553
2019-12-05_03:00:00	2019-12-05 13:00:00	0	11.88	7.49	0.23	0	0	302.82	-2.08	-1.25	29.67	2.42671	58.9959	118.1	31.3	5	327.8	169.7	9334							0.178019									12234.6	12234.6			2.6569	266.996			6.62184	6.62184
2019-12-05_04:00:00	2019-12-05 14:00:00	0	13.11	8.48	0.28	0	0	303.32	-2.95	-1.89	30.17	3.50351	57.3533	117.8	32.1	4.8	325.1	132.4	8755							0.216718									11950.9	11950.9			3.7249	311.17			1.68088	7.74794
2019-12-05_05:00:00	2019-12-05 15:00:00	0	22.09	16.35	0.72	0	0	303.06	-4.06	-2.52	29.91	4.77849	58.1727	85.5	33.1	2.7	313.5	61.9	10718							0.557276									4781.72	4781.72			10.1761	337.824			4.32014	4.32014
2019-12-05_06:00:00	2019-12-05 16:00:00	0	26.25	19.66	0.87	0	0	301.52	-4.75	-2.93	28.37	5.58099	58.3321	64	29.1	1.3	60.6	107.1	13354							0.673375									1966.04	1966.04			0.5329	164.866			18.3268	18.3268
2019-12-05_07:00:00	2019-12-05 17:00:00	0	17.61	11.5	0.38	0	0	300.43	-3.41	-3.24	27.28	4.7038	46.4645	81.5	25.9	1.4	65.6	138.4	7853							0.294118									4900	4900			1.9044	73.1025			10.9151	10.9151
2019-12-05_08:00:00	2019-12-05 18:00:00	0	19.64	13.5	0.5	0	0	298.64	-2.79	-3.06	25.49	4.14098	42.3576	88.1	24.8	0.9	75	128.1	4584							0.386997									5565.16	5565.16			0.4761	32.0356			10.5039	10.5039
2019-12-05_09:00:00	2019-12-05 19:00:00	0	21.76	15.57	0.61	0	0	296.64	-2.2	-3.1	23.49	3.80132	35.3626	77.8	23.5	0.4	81.4	110.4	4960							0.472136									3872.57	3872.57			0.0001	5.5696			11.5689	11.5689
2019-12-05_10:00:00	2019-12-05 20:00:00	0.01	70.39	60.52	3.19	0.01	0	295.36	-1.68	-2.85	22.21	3.30831	30.5183	65.3	21.7	0.4	224.6	137.6	5258							2.46904									22.8484	5944.41			0.2601	0.5184			8.45825	8.45825
2019-12-05_11:00:00	2019-12-05 21:00:00	0.04	158.34	141.52	7.82	0.02	0.01	293.61	-0.92	-2.62	20.46	2.77683	19.3486	63.5	21.2	0.2	320.6	114.3	6171							6.05263									6087.12	24429.7			0.5476	8.8209			6.64007	6.64007
2019-12-05_12:00:00	2019-12-05 22:00:00	0.05	187.86	168.97	9.3	0.02	0.01	292.55	0.25	-2.72	19.4	2.73146	354.749	78.1	21.3	0.3	116.1	121.9	5393							7.19814									8257.36	39342.7			3.61	15.4449			5.91202	6.19281
2019-12-05_13:00:00	2019-12-05 23:00:00	0.07	285.34	258.67	14.25	0.03	0.01	292.35	1.91	-2.07	19.2	2.81656	317.302	93	21.3	0.6	340.3	160.4	4367							11.0294									27446.5	91778.7			4.41	17.0569			4.91313	4.91313
2019-12-05_14:00:00	2019-12-06 00:00:00	0.11	353.27	321.36	17.7	0.04	0.02	291.9	2.67	-1.63	18.75	3.12823	301.404	102.4	20.7	0.2	26.5	153.9	1837							13.6997									47943.5	140655			3.8025	26.8324			8.57451	8.57451
2019-12-05_15:00:00	2019-12-06 01:00:00	0.13	258.17	234.49	12.81	0.03	0.01	291.53	3.14	-1.29	18.38	3.39466	292.334	107.2	20.9	1.6	170.7	167.7	4408							9.91486									16202.7	85831.4			6.3504	28.6225			3.2208	3.2208
2019-12-05_16:00:00	2019-12-06 02:00:00	0.14	130.65	117.52	6.39	0.01	0.01	290.38	3.1	-0.99	17.23	3.25424	287.711	64.4	19.7	2.1	176.8	56.2	4287							4.94582									2821.73	17742.2			6.1009	59.29			1.33228	1.33228
2019-12-05_17:00:00	2019-12-06 03:00:00	0.19	68.64	60.33	3.25	0.01	0	289.38	3	-1	16.23	3.16228	288.435	28.3	19.3	1.8	193.8	55.8	3392							2.51548									1025.92	1592.81			9.4249	82.81			1.8558	1.8558
2019-12-05_18:00:00	2019-12-06 04:00:00	0.24	56.58	49.09	2.62	0.01	0	288.68	3.13	-0.99	15.53	3.28283	287.552	26.2	19.1	2	191.9	56	2759							2.02786									523.952	705.965			12.7449	100			1.64566	1.64566
2019-12-05_19:00:00	2019-12-06 05:00:00	0.29	43.03	36.42	1.91	0	0	287.67	2.96	-0.09	14.52	2.96137	271.742	27.6	19	1.6	195.8	56	3135							1.47833									77.7924	234.09			20.0704	123.432			1.85332	1.85332
2019-12-05_20:00:00	2019-12-06 06:00:00	0.3	42.36	35.77	1.85	0	0	292.14	3.13	-0.46	18.99	3.16362	278.361	31	18.8	1	211.8	59.2	3968							1.43189									22.7529	325.803			0.0361	46.7856			4.68126	4.68126
2019-12-05_21:00:00	2019-12-06 07:00:00	0.31	34.3	28.51	1.45	0	0	295.89	2.99	-0.72	22.74	3.07547	283.539	28	19.4	0.5	263.5	51.7	5293							1.12229									0.2601	60.6841			11.1556	11.1556			6.63303	6.63303
2019-12-05_22:00:00	2019-12-06 08:00:00	0.22	37.09	32	1.69	0	0	299.63	2.91	-0.72	26.48	2.99775	283.897	24.5	20.8	1.4	326.6	59.1	7689							1.30805									56.25	60.5284			32.2624	32.2624			2.5528	2.5528
2019-12-05_23:00:00	2019-12-06 09:00:00	0.13	31.67	27.82	1.49	0	0	302.25	2.26	-0.51	29.1	2.31683	282.717	31.9	23.3	2	347.8	83.6	8438							1.15325									16.6464	121			33.64	60.3729			0.100381	1.44762
2019-12-06_00:00:00	2019-12-06 10:00:00	0.08	21.32	18.79	1.01	0	0	303.9	1.56	-0.74	30.75	1.72662	295.378	42.3	26	1.9	12.6	109	5066							0.781734									552.72	552.72			22.5625	146.894			0.0300623	3.58491
2019-12-06_01:00:00	2019-12-06 11:00:00	0	0.09	0.02	0	0	0	299.93	-5.19	0.09	26.78	5.19078	90.9933	42.5	27.6	2.4	47.6	107.2	937							0									1804.55	1804.55			0.6724	95.0625			7.78845	7.78845
2019-12-06_02:00:00	2019-12-06 12:00:00	0	0.77	0.4	0.02	0	0	299.36	-7.41	-0.79	26.21	7.45199	83.9147	48.4	28	2.1	88	127.5	955							0.0154799									2304	2304			3.2041	91.7764			28.6438	28.6438
2019-12-06_03:00:00	2019-12-06 13:00:00	0	1.99	1.21	0.05	0	0	298.76	-8.07	-1.04	25.61	8.13674	82.6568	56.6	25.7	1.6	114.2	103.2	1001							0.0386997									3068.05	3068.05			0.0081	44.6224			42.7289	42.7289
2019-12-06_04:00:00	2019-12-06 14:00:00	0	2.68	1.15	0.03	0	0	298.43	-7.93	-1.8	25.28	8.13172	77.2115	51.2	23.3	1.8	153.5	109.1	1007							0.0232198									2505	2505			3.9204	15.6025			40.0907	40.0907
2019-12-06_05:00:00	2019-12-06 15:00:00	0	2.94	0.92	0	0	0	298.11	-7.74	-2.21	24.96	8.04933	74.0645	41.8	22	1.8	151.1	92.1	1042							0									1671.17	1671.17			8.7616	8.7616			39.0541	39.0541
2019-12-06_06:00:00	2019-12-06 16:00:00	0	4.27	1.56	0.02	0	0	297.61	-7.53	-2.97	24.46	8.09455	68.4748	36.7	23.1	1.2	105.4	74.7	1134							0.0154799									1234.82	1234.82			1.8496	8.5849			47.5349	47.5349
2019-12-06_07:00:00	2019-12-06 17:00:00	0	5.96	2.83	0.09	0	0	296.95	-7.25	-3.64	23.8	8.11247	63.3403	49.1	24.4	2.9	52.2	103.9	1577							0.0696594									2140.91	2140.91			0.36	12.7449			27.1698	30.1672
2019-12-06_08:00:00	2019-12-06 18:00:00	0	8.49	4.97	0.21	0	0	296.11	-5.75	-4.14	22.96	7.08534	54.2462	50.4	23.4	1.9	52.1	97	2837							0.162539									2063.88	2063.88			0.1936	2.9929			26.8878	26.8878
2019-12-06_09:00:00	2019-12-06 19:00:00	0	10.76	6.5	0.29	0	0	294.97	-4.59	-3.46	21.82	5.74802	52.9907	41.5	22.7	1	34.5	94.9	2681							0.224458									1225	1225			0.7744	0.7744			22.5437	22.5437
2019-12-06_10:00:00	2019-12-06 20:00:00	0	12.72	7.69	0.34	0	0	294.41	-4.39	-3.65	21.26	5.70917	50.2588	35.9	22	0.8	46.3	72.2	2209							0.263158									795.804	795.804			0.5476	1.8769			24.0999	24.0999
2019-12-06_11:00:00	2019-12-06 21:00:00	0	10.03	5.09	0.18	0	0	293.87	-3.8	-3	20.72	4.84149	51.71	29.9	21.3	0	231.5	69.9	2159							0.139319									615.536	615.536			0.3364	6.8121			23.44	23.44
2019-12-06_12:00:00	2019-12-06 22:00:00	0	8.34	3.35	0.07	0	0	293.34	-3.52	-2.49	20.19	4.31167	54.7251	38.1	21.5	2.5	189.7	94.9	1959							0.0541796									1207.56	1207.56			1.7161	8.6436			3.28215	3.28215
2019-12-06_13:00:00	2019-12-06 23:00:00	0	8.55	3.69	0.09	0	0	293.12	-3.86	-2.82	19.97	4.78038	53.8494	32.9	20.7	2.7	198.6	54.1	1765							0.0696594									853.224	853.224			0.5329	15.6816			4.32797	4.32797
2019-12-06_14:00:00	2019-12-07 00:00:00	0	8.08	3.79	0.11	0	0	292.78	-3.71	-3.01	19.63	4.77747	50.947	22.1	20.6	2.4	202.4	44.4	1972							0.0851393									335.256	521.209			0.9409	19.36			5.65235	5.65235
2019-12-06_15:00:00	2019-12-07 01:00:00	0	8.4	4.34	0.14	0	0	292.58	-3.96	-3.37	19.43	5.19986	49.602	18.1	20.3	2.5	202.7	39	1668							0.108359									189.338	690.638			0.7569	24.01			7.28922	7.28922
2019-12-06_16:00:00	2019-12-07 02:00:00	0	9.35	5.02	0.17	0	0	292.43	-3.94	-3.31	19.28	5.14584	49.9664	14.4	19.9	2	202	33.8	2084							0.131579									87.9844	858.49			0.3844	29.7025			9.89633	9.89633
2019-12-06_17:00:00	2019-12-07 03:00:00	0	10.43	5.66	0.19	0	0	292.16	-3.56	-3.23	19.01	4.80692	47.7826	15	19.4	1.6	209	36.5	1992							0.147059									87.2356	787.364			0.1521	38.6884			10.2843	10.2843
2019-12-06_18:00:00	2019-12-07 04:00:00	0	11.84	6.59	0.23	0	0	291.89	-3.25	-3.21	18.74	4.568	45.3549	14	19.4	1.4	211.9	43.7	2092							0.178019									54.9081	791.297			0.4356	42.1201			10.0362	10.0362
2019-12-06_19:00:00	2019-12-07 05:00:00	0	13.27	7.62	0.28	0	0	291.55	-2.46	-2.89	18.4	3.79522	40.4049	19	19.4	1.3	207	49.7	1593							0.216718									129.504	488.41			1	46.6489			6.22613	6.22613
2019-12-06_20:00:00	2019-12-07 06:00:00	0	16.16	10.13	0.4	0	0	293.09	-1.92	-3.61	19.94	4.08883	28.0066	19.3	19.6	1	210.7	49.6	1581							0.309598									84.0889	372.104			0.1156	25.9081			9.54085	9.54085
2019-12-06_21:00:00	2019-12-07 07:00:00	0	22.57	16.48	0.72	0	0	294.87	-1.45	-3.8	21.72	4.06725	20.8859	15.8	20.8	1.1	221.6	43.4	1587							0.557276									0.4624	270.274			0.8464	4.4521			8.80456	8.80456
2019-12-06_22:00:00	2019-12-07 08:00:00	0	31.17	24.82	1.15	0	0	296.89	-1.1	-3.27	23.74	3.45006	18.5926	19.3	21.8	1.6	178.8	56	1014							0.890093									30.4704	30.4704			3.7636	3.7636			3.42271	3.42271
2019-12-06_23:00:00	2019-12-07 09:00:00	0	41.74	34.99	1.66	0	0	298.72	-0.58	-2.21	25.57	2.28484	14.7054	26.7	22.2	2.7	149.9	64.9	595							1.28483									68.7241	168.221			11.3569	11.3569			0.172357	0.286395
2019-12-07_00:00:00	2019-12-07 10:00:00	0	50.88	43.43	2.07	0	0	300.17	-1.23	-1.45	27.02	1.90142	40.3072	32.3	22.6	3.1	147.8	69.5	369							1.60217									123.877	729.54			19.5364	24.9001			1.43659	1.43659
2019-12-07_01:00:00	2019-12-07 11:00:00	0	52.74	44.61	2.09	0	0	301.37	-2.49	-0.92	28.22	2.65452	69.722	32.8	22.7	3.3	144	63	264							1.61765									139.476	823.116			30.4704	39.5641			0.416639	0.416639
2019-12-07_02:00:00	2019-12-07 12:00:00	0	49.58	40.59	1.85	0	0	302.2	-3.82	-0.83	29.05	3.90913	77.7416	29.9	23.6	2.9	109.4	55.8	285							1.43189									114.276	473.933			29.7025	64.3204			1.01834	1.66186
2019-12-07_03:00:00	2019-12-07 13:00:00	0	41.73	31.91	1.39	0	0	302.55	-5.1	-0.87	29.4	5.17367	80.3193	26.1	23.7	3.7	108.1	55.2	288							1.07585									33.7561	86.3041			32.49	71.7409			2.17171	11.2471
2019-12-07_04:00:00	2019-12-07 14:00:00	0	30.5	19.28	0.73	0	0	301.84	-6.89	-1.75	28.69	7.10877	75.7489	26.4	23.9	3.9	113.5	53.4	302							0.565015									50.6944	50.6944			22.9441	63.3616			10.2962	30.1266
2019-12-07_05:00:00	2019-12-07 15:00:00	0	27.3	15.35	0.54	0	0	301	-7.02	-2.71	27.85	7.52493	68.8916	25.7	22.7	3.8	109.8	50.9	372							0.417957									107.122	107.122			26.5225	35.0464			13.8751	33.6972
2019-12-07_06:00:00	2019-12-07 16:00:00	0	27.98	16.47	0.61	0	0	300.21	-6.5	-3.32	27.06	7.29879	62.9436	20.7	22.3	3.3	103.8	47.7	690							0.472136									17.8929	133.403			22.6576	22.6576			15.9904	25.7942
2019-12-07_07:00:00	2019-12-07 17:00:00	0	29.45	17.26	0.67	0	0	299.22	-5.62	-3.61	26.07	6.67956	57.2855	19.5	22.1	2.2	62.6	47.3	883							0.518576									5.0176	143.042			15.7609	15.7609			20.0664	20.0664
2019-12-07_08:00:00	2019-12-07 18:00:00	0	32.42	18.65	0.72	0	0	297.94	-4.88	-3.8	24.79	6.18501	52.0926	21.5	22	2.1	94.7	45.6	892							0.557276									8.1225	73.4449			7.7841	7.7841			16.6873	16.6873
2019-12-07_09:00:00	2019-12-07 19:00:00	0	34.28	19.65	0.75	0	0	296.66	-4.4	-3.95	23.51	5.91291	48.0849	25.8	21.4	2.7	115.9	45.6	1030							0.580495									37.8225	37.8225			4.4521	4.4521			10.3228	10.3228
2019-12-07_10:00:00	2019-12-07 20:00:00	0	32.13	17.18	0.59	0	0	296.05	-3.91	-4.43	22.9	5.90872	41.4323	16.6	21.1	1.9	120.4	46.7	1044							0.456656									0.3364	223.204			3.24	3.24			16.0699	16.0699
2019-12-07_11:00:00	2019-12-07 21:00:00	0	24.6	11.35	0.27	0	0	295.45	-3.17	-3.96	22.3	5.07252	38.6776	22	20.9	1.7	134.8	53.3	1029							0.208978									113.423	236.237			1.96	2.0449			11.3739	11.3739
2019-12-07_12:00:00	2019-12-07 22:00:00	0	21.12	9.94	0.23	0	0	294.93	-2.97	-3.42	21.78	4.5296	40.9718	22.6	20.5	2	158.6	62.4	1008							0.178019									160.276	261.792			1.6384	5.5225			6.39889	6.39889
2019-12-07_13:00:00	2019-12-07 23:00:00	0	21.76	12.26	0.41	0	0	294.63	-3.02	-3.42	21.48	4.56254	41.4459	19.2	20.5	2.4	143.3	41.8	977							0.317337									48.1636	297.908			0.9604	7.0225			4.67659	4.67659
2019-12-07_14:00:00	2019-12-08 00:00:00	0	24.55	15.81	0.63	0	0	294.4	-2.95	-3.47	21.25	4.55449	40.3694	17.2	20.5	2.2	138.8	39.1	972							0.487616									1.9321	246.804			0.5625	8.2944			5.54363	5.54363
2019-12-07_15:00:00	2019-12-08 01:00:00	0	28.89	20.45	0.89	0	0	294.15	-2.73	-3.2	21	4.20629	40.4684	18.6	20.2	1.2	134.5	33.6	943							0.688854									3.4225	93.5089			0.64	11.7649			9.0378	9.0378
2019-12-07_16:00:00	2019-12-08 02:00:00	0	36.12	27.67	1.28	0	0	293.69	-2	-2.47	20.54	3.17819	38.9978	15.2	19.9	1.2	149.6	69.1	1010							0.990712									155.501	155.501			0.4096	17.5561			3.91324	3.91324
2019-12-07_17:00:00	2019-12-08 03:00:00	0	48.77	39.98	1.93	0	0	292.32	-1.55	-1.65	19.17	2.26385	43.2102	17.3	20.3	3.1	119.7	36	871							1.49381									514.382	514.382			1.2769	26.6256			0.699153	0.699153
2019-12-07_18:00:00	2019-12-08 04:00:00	0	65.5	56.41	2.77	0.01	0	292.62	-1.77	-2.17	19.47	2.80032	39.2031	15.3	20.6	3.1	111.7	34.9	790							2.14396									1690.03	1690.03			1.2769	20.7936			0.0898073	0.144644
2019-12-07_19:00:00	2019-12-08 05:00:00	0	78.13	68.07	3.31	0.01	0.01	291.29	0.56	-2.33	18.14	2.39635	346.486	16.1	20.5	3.3	110	37.6	822							2.56192									2700.88	2700.88			5.5696	35.8801			0.816581	0.816581
2019-12-07_20:00:00	2019-12-08 06:00:00	0	88.8	76.76	3.72	0.01	0.02	293.46	0.8	-0.36	20.31	0.877268	294.228	17.9	20.8	2.2	103.8	46.2	737							2.87926									3464.5	3464.5			0.2401	12.3904			1.74962	5.96694
2019-12-07_21:00:00	2019-12-08 07:00:00	0	87.23	75.2	3.66	0.01	0.03	297.48	1.34	-0.42	24.33	1.40428	287.403	13.9	21.8	1.8	79.4	39.2	800							2.83282									3757.69	3757.69			6.4009	6.4009			0.156595	5.36256
2019-12-07_22:00:00	2019-12-08 08:00:00	0	51.07	43.52	2.12	0.01	0.02	302.17	2.27	-1.9	29.02	2.96022	309.93	16.1	22.4	2.1	72.1	38.5	709							1.64087									751.856	751.856			43.8244	46.1041			0.739978	0.739978
2019-12-07_23:00:00	2019-12-08 09:00:00	0	16.6	13.49	0.64	0	0.01	306.62	3.77	-1.91	33.47	4.22623	296.868	16.9	22.7	3.3	114	42	584							0.495356									11.6281	335.989			115.993	133.172			0.857898	4.02495
2019-12-08_00:00:00	2019-12-08 10:00:00	0	12.13	9.98	0.46	0	0.01	308.88	3.92	-1.42	35.73	4.16927	289.913	16.8	23	3.9	114.4	30.7	482							0.356037									46.5124	481.364			162.053	198.81			0.0725055	6.49877
2019-12-08_01:00:00	2019-12-08 11:00:00	0	11.35	9.73	0.45	0	0	309.97	2.47	-0.4	36.82	2.50218	279.199	15	23.5	4.7	108.5	32.8	569							0.348297									27.7729	575.52			177.422	246.176			4.83042	4.83042
2019-12-08_02:00:00	2019-12-08 12:00:00	0	17.73	15.48	0.72	0	0	309.33	-1.19	0.74	36.18	1.40132	121.875	17.5	23.5	5.7	108.9	38.8	321							0.557276									4.0804	247.748			160.782	226.503			18.4786	18.4786
2019-12-08_03:00:00	2019-12-08 13:00:00	0	20.83	18.02	0.83	0	0	309	-3.59	-0.34	35.85	3.60606	84.5899	16.8	23.4	6.3	111.6	50.1	208							0.642415									1.4884	193.21			155.003	213.744			7.25729	19.2376
2019-12-08_04:00:00	2019-12-08 14:00:00	0	27.24	22.82	1.02	0	0	307.94	-5.11	-1.82	34.79	5.42444	70.396	15.7	23.8	5.6	93.8	33.1	226							0.789474									50.6944	104.04			120.78	194.882			0.0308229	30.2988
2019-12-08_05:00:00	2019-12-08 15:00:00	0	31.67	25.83	1.11	0	0	306.92	-5.53	-2.38	33.77	6.02041	66.7141	11.2	23.5	5.6	91.9	33.5	305							0.859133									214.037	214.037			105.473	159.77			0.176742	37.215
2019-12-08_06:00:00	2019-12-08 16:00:00	0	28.47	22.44	0.94	0	0	306.6	-4.94	-2.51	33.45	5.54109	63.0651	6.4	23	5.4	94.8	39.6	396							0.727554									257.282	395.214			109.203	139.712			0.0199069	29.3882
2019-12-08_07:00:00	2019-12-08 17:00:00	0	27.38	21.05	0.89	0	0	306.01	-4.23	-3.69	32.86	5.61329	48.9006	17.5	22.4	5.2	94.2	34.6	474							0.688854									12.6025	103.429			109.412	112.997			0.170807	28.0189
2019-12-08_08:00:00	2019-12-08 18:00:00	0	26.84	19.16	0.78	0	0	303.78	-3.67	-3.04	30.63	4.76555	50.3639	15.1	21.9	4.6	88.7	34.7	487							0.603715									16.4836	209.092			76.2129	76.2129			0.027408	14.7883
2019-12-08_09:00:00	2019-12-08 19:00:00	0	29.27	20.48	0.85	0	0	301.46	-3.09	-3.49	28.31	4.66135	41.5214	11.3	21.4	3.6	81.1	41.1	474							0.657895									84.2724	286.964			47.7481	47.7481			1.12647	7.51501
2019-12-08_10:00:00	2019-12-08 20:00:00	0	30.53	20.15	0.8	0	0	300.14	-2.98	-3.51	26.99	4.6044	40.3315	11.4	21.2	3.1	86	38.6	450							0.619195									76.5625	294.809			33.5241	33.5241			2.26322	4.7716
2019-12-08_11:00:00	2019-12-08 21:00:00	0	28.79	16.73	0.54	0	0	298.81	-2.39	-2.87	25.66	3.73484	39.786	15.1		2.7	77.3	43.7	410							0.417957									2.6569	285.272			658.436	658.436			1.07089	1.07089
2019-12-08_12:00:00	2019-12-08 22:00:00	0	24.82	13.34	0.35	0	0	298.02	-2.43	-2.51	24.87	3.49357	44.0723	12.5		2.7	69.3	35.2	395							0.270898									0.7056	523.494			618.517	618.517			0.629746	0.629746
2019-12-08_13:00:00	2019-12-08 23:00:00	0	32.51	22.27	0.91	0	0	297.29	-2.2	-2.45	24.14	3.2928	41.9227	12.9		2.9	61.9	32.4	329							0.704334									87.7969	183.602			582.74	582.74			0.154288	0.452653
2019-12-08_14:00:00	2019-12-09 00:00:00	0	60.69	50.24	2.52	0.01	0	296.73	-2.32	-2.43	23.58	3.35966	43.6735	12.9		3	58.1	35.4	295							1.95046									1394.28	1394.28			556.016	556.016			0.129354	0.705025
2019-12-08_15:00:00	2019-12-09 01:00:00	0	66.06	57.45	2.95	0.01	0	296.41	-2.36	-2.67	23.26	3.5635	41.4734	13.5		2.3	62.5	37.1	264							2.28328									1931.6	1931.6			541.028	541.028			1.59642	1.59642
2019-12-08_16:00:00	2019-12-09 02:00:00	0	59.16	52.31	2.66	0.01	0	294.33	-1.33	-1.94	21.18	2.35213	34.4334	3.7		2.2	70.7	31.9	220							2.05882									2362.93	2362.93			448.592	549.902			0.0231425	0.936779
2019-12-08_17:00:00	2019-12-09 03:00:00	0	53.59	47.59	2.38	0.01	0	294.33	-0.41	-0.74	21.18	0.845991	28.9889	9.7		1.9	66.8	35.1	225							1.84211									1435.65	1435.65			448.592	549.902			1.11094	7.69513
2019-12-08_18:00:00	2019-12-09 04:00:00	0	55.98	47.68	2.35	0.01	0.02	293.42	0.43	1	20.27	1.08853	203.268	13.8		2.3	58.3	34.5	256							1.81889									1147.85	1147.85			410.873	593.41			1.46766	4.54316
2019-12-08_19:00:00	2019-12-09 05:00:00	0	59.84	47	2.21	0.02	0.05	292.46	1.24	1.98	19.31	2.33624	212.057	16.9		2.4	62.2	36.4	222							1.71053									906.01	906.01			372.876	641.102			0.00406581	0.614286
2019-12-08_20:00:00	2019-12-09 06:00:00	0	53.93	39.09	1.67	0.01	0.04	295.18	1.81	2.48	22.03	3.07026	216.123	16.2		2.7	57.4	33.6	233							1.29257									523.952	523.952			485.321	510.76			0.137093	0.137093
2019-12-08_21:00:00	2019-12-09 07:00:00	0	47.71	32.54	1.25	0.01	0.04	296.43	1.93	1.99	23.28	2.77218	224.123	11.3		2.8	57.3	37	200							0.967492									451.138	451.138			541.958	541.958			0.000773771	0.00272309
2019-12-08_22:00:00	2019-12-09 08:00:00	0	45.84	31.71	1.25	0.01	0.04	299.43	1.01	1.28	26.28	1.63049	218.276	8.4		3.1	59.9	35.1	217							0.967492									543.356	543.356			690.638	690.638			2.15946	2.15946
2019-12-08_23:00:00	2019-12-09 09:00:00	0.01	35.55	27.02	1.2	0.01	0.03	304.68	1.7	-0.08	31.53	1.70188	272.694			3	75.3	40.9	498							0.928793									730.08	730.08			994.141	994.141			1.68511	1.68511
2019-12-09_00:00:00	2019-12-09 10:00:00	0	18.98	14.41	0.64	0	0.01	307.87	-0.29	-0.42	34.72	0.510392	34.6243	24.6		2.9	70.3	46.1	298							0.495356									103.836	103.836			1205.48	1205.48			5.71023	5.71023
2019-12-09_01:00:00	2019-12-09 11:00:00	0	15.34	11.32	0.46	0	0.01	308.36	-1.99	-0.55	35.21	2.06461	74.5503	20.9		3.7	75	40.1	231							0.356037									91.7764	272.25			1239.74	1239.74			2.67451	2.67451
2019-12-09_02:00:00	2019-12-09 12:00:00	0.01	15.15	11.71	0.5	0	0.01	309.86	-2.32	-1.08	36.71	2.55906	65.0373	18.7		5	79.6	35.8	229							0.386997									48.8601	335.256			1347.62	1347.62			5.95818	5.95818
2019-12-09_03:00:00	2019-12-09 13:00:00	0.06	11.51	8.77	0.38	0	0.01	311.27	-2.36	-1.59	38.12	2.84565	56.0308	15.7		5.5	81.2	37	609							0.294118									48.0249	588.062			1453.13	1453.13			7.0456	7.98427
2019-12-09_04:00:00	2019-12-09 14:00:00	0.12	12.53	9.33	0.4	0	0	311.66	-3.38	-2.98	38.51	4.50608	48.5989	16.1		5	75.9	38.4	551							0.309598									45.8329	542.424			1483.02	1483.02			0.243952	15.8889
2019-12-09_05:00:00	2019-12-09 15:00:00	0.15	12.71	9.28	0.41	0	0	311.79	-2.81	-3.36	38.64	4.38015	39.9062	13.2		4.9	77	40.6	302							0.317337									15.3664	688.538			1493.05	1493.05			0.270246	14.1387
2019-12-09_06:00:00	2019-12-09 16:00:00	0.24	14.75	10.43	0.49	0	0	311.73	-0.84	-3.92	38.58	4.00899	12.0948	16.4		4.5	71.8	45.4	563							0.379257									35.6409	479.172			1488.42	1488.42			0.241091	8.93406
2019-12-09_07:00:00	2019-12-09 17:00:00	0.31	18.99	13.76	0.68	0	0	311.1	-0.59	-4.72	37.95	4.75673	7.1251	17.5	23.2	4	69.8	48.7	510							0.526316									13.9876	304.852			217.563	272.91			0.572643	10.4764
2019-12-09_08:00:00	2019-12-09 18:00:00	0.31	22.68	16.63	0.83	0	0	309.05	-2.32	-4.9	35.9	5.42148	25.3362	16	22.8	4.2	62.9	57.4	442							0.642415									0.3969	258.888			171.61	197.965			1.492	16.8221
2019-12-09_09:00:00	2019-12-09 19:00:01	0.42	27.16	19.49	1.01	0	0	306.1	-1.71	-4.61	32.95	4.91693	20.3516	18.1	22.6	3.9	57.4	44.1	336							0.781734									1.9321	123.877			107.123	119.246			1.03415	10.8697
2019-12-09_10:00:00	2019-12-09 20:00:01	0.53	39.98	31.23	1.69	0	0	304.98	-1.03	-4.3	31.83	4.42164	13.4706	19.3	22.5	2.6	47.7	42.2	421							1.30805									142.325	142.325			87.0489	94.09			3.31837	3.31837
2019-12-09_11:00:00	2019-12-09 21:00:01	0.61	121.73	105.86	5.93	0.01	0.01	304.14	-0.55	-4.5	30.99	4.53349	6.96834	21.9	22.2	2.2	44.6	40.8	332							4.58978									7049.28	7049.28			77.2641	77.2641			5.44516	5.44516
2019-12-09_12:00:00	2019-12-09 22:00:01	0.98	143.39	123.93	6.99	0.01	0.01	304.4	0.36	-5.03	31.25	5.04287	355.906	23.1	21.9	1.4	32.9	41.5								5.41022									10166.7	10166.7			87.4225	87.4225			13.2705	13.2705
2019-12-09_13:00:00	2019-12-09 23:00:01	1.11	41.98	30.76	1.62	0	0	305.52	1.02	-5.48	32.37	5.57412	349.456	19.3	21.7	0.8	29.3	51.8	341							1.25387									131.332	131.332			113.849	113.849			22.7922	22.7922
2019-12-09_14:00:00	2019-12-10 00:00:01	1.53	23.82	11.42	0.47	0	0	305.25	2.75	-5.15	32.1	5.83824	331.899	25.6	21.1	0.4	161.8	44.7	436							0.363777									201.072	201.072			121	121			29.5744	29.5744
2019-12-09_15:00:00	2019-12-10 01:00:01	3.05	29.07	7.73	0.14	0	0	304.21	3.59	-3.43	31.06	4.96518	313.694	28.7	20.4	1	156.9	82.2	459							0.108359									439.741	439.741			113.636	113.636			15.7226	15.7226
2019-12-09_16:00:00	2019-12-10 02:00:01	4.3	36.98	8.96	0.1	0	0	304.67	4.14	-1.16	31.52	4.29944	285.653	24.2	20	0.8	159	50.5	482							0.0773994									232.258	242.114			132.71	132.71			12.2461	12.2461
2019-12-09_17:00:00	2019-12-10 03:00:01	2.69	64.53	31.18	0.92	0.01	0.02	297.84	3.77	6.3	24.69	7.34186	210.897	22.3	19.4	0.5	178.3	52.7	557							0.712074									78.8544	78.8544			27.9841	27.9841			46.811	46.811
2019-12-09_18:00:00	2019-12-10 04:00:01	2.16	76.07	46.11	1.68	0.01	0.02	295.82	2.81	4.08	22.67	4.95404	214.556	18.1	18.8	0.4	292	37.8	611							1.30031									784.56	784.56			14.9769	14.9769			20.7393	20.7393
2019-12-09_19:00:00	2019-12-10 05:00:01	2.42	84.6	53.26	2.13	0.01	0.03	295.42	1.9	3.62	22.27	4.08832	207.693	22.2	18.4	0.6	310.9	39.1	609							1.64861									964.724	964.724			14.9769	15.6816			12.1684	12.1684
2019-12-09_20:00:00	2019-12-10 06:00:01	1.7	90.08	60.66	2.45	0.01	0.03	296.47	1.61	4.01	23.32	4.32113	201.875	27.7	19.2	1.5	331.6	53.5	627							1.89628									1086.36	1571.33			16.9744	16.9744			7.9588	7.9588
2019-12-09_21:00:00	2019-12-10 07:00:01	0.86	86.15	60.71	2.38	0.01	0.02	296.9	1.55	4.73	23.75	4.97749	198.144	27.7	20.8	2.8	329.4	69.2	851							1.84211									1089.66	1575.3			8.7025	8.7025			4.74146	5.09626
2019-12-09_22:00:00	2019-12-10 08:00:01	0.6	71.16	48.82	1.73	0.01	0.01	296.97	1.55	5.5	23.82	5.71424	195.739	47.8	23.3	4.1	333.2	143.7	1108							1.33901									1.0404	2294.41			0.2704	6.2001			2.60576	18.4405
2019-12-09_23:00:00	2019-12-10 09:00:01	0.29	62.71	37.12	0.92	0	0.01	296.19	1.33	7.01	23.04	7.13505	190.743	125.1	26.7	4.5	327.6	265.4	913							0.712074									7740.48	12882.2			13.3956	26.1121			6.94351	37.3939
2019-12-10_00:00:00	2019-12-10 10:00:01	0.41	64.96	33.13	0.64	0	0	296.62	1.01	7.71	23.47	7.77587	187.463	176.2	31.9	4.3	319.6	187.3	797							0.495356									20469	25795.6			71.0649	115.348			12.0817	42.9795
2019-12-10_01:00:00	2019-12-10 11:00:01	0.49	60.24	22.64	0.19	0	0	296.86	0.48	7.18	23.71	7.19603	183.825	134.9	35.5	2.9	343.7	137.8	630							0.147059									12602.3	12602.3			139.004	212.576			18.4558	20.94
2019-12-10_02:00:00	2019-12-10 12:00:01	0.26	60.15	20.43	0.06	0	0	296.76	-0.22	7.11	23.61	7.1134	178.228	110.3	29.9	3.1	62.6	173.3	618							0.0464396									8076.62	8076.62			39.5641	78.8544			16.1074	22.028
2019-12-10_03:00:00	2019-12-10 13:00:01	0.17	62.55	20.85	0.03	0	0	296.44	-1.27	6.42	23.29	6.54441	168.81	114.7	29	3	64.3	163.7	693							0.0232198									8807.82	8807.82			32.6041	58.6756			12.5628	16.1959
2019-12-10_04:00:00	2019-12-10 14:00:01	0.15	63.44	21.44	0.02	0	0	296.25	-0.91	6.03	23.1	6.09828	171.418	122	29.5	2.7	52.9	157	1215							0.0154799									10112.3	10112.3			40.96	63.5209			11.5483	11.5483
2019-12-10_05:00:00	2019-12-10 15:00:01	0.15	64.85	22.07	0.02	0	0	295.65	-1.17	5.82	22.5	5.93644	168.633	132.6	29.6	3.7	56.1	182.6	3446							0.0154799									12216.9	12216.9			50.41	55.8009			5.00166	16.9451
2019-12-10_06:00:00	2019-12-10 16:00:01	0.1	65.12	22.31	0.01	0	0	295.06	-1.38	5.41	21.91	5.58323	165.69	142.5	29.3	3.2	56.8	166.1	3851							0.00773994									14445.6	14445.6			54.6121	54.6121			5.6798	10.6487
2019-12-10_07:00:00	2019-12-10 17:00:01	0.07	67.37	23.28	0	0	0	294.13	-1.07	5.43	20.98	5.53442	168.852	111.3	26.4	2.6	53.9	135.7	6544							0									7747.52	7747.52			29.3764	29.3764			8.61082	8.61082
2019-12-10_08:00:00	2019-12-10 18:00:01	0.07	66.88	23.19	0	0	0	293.9	-0.52	5.18	20.75	5.20603	174.267	84.4	23.2	4.5	188.2	126.7	10088							0									3746.66	3746.66			6.0025	6.0025			0.498485	17.5229
2019-12-10_09:00:00	2019-12-10 19:00:01	0.07	65.28	22.45	0	0	0	293.27	-0.53	4.44	20.12	4.47152	173.193	87.9	21.4	5.5	186.4	146.1	5308							0									4283.7	4283.7			1.6384	9.6721			1.05777	19.816
2019-12-10_10:00:00	2019-12-10 20:00:01	0.05	66.05	22.53	0	0	0	293.13	-0.26	4.61	19.98	4.61733	176.772	70.5	20.6	4.9	189.1	56.2	3139							0									2301.12	2301.12			0.3844	16.4025			0.0799046	15.9786
2019-12-10_11:00:00	2019-12-10 21:00:01	0.07	68.44	23.35	0	0	0	292.62	-1.03	5.41	19.47	5.50718	169.22	43	20.4	4.6	188	43	3904							0									386.122	386.122			0.8649	22.6576			0.82297	21.0422
2019-12-10_12:00:00	2019-12-10 22:00:01	0.07	68.12	23.34	0.01	0	0	292.35	-0.42	5.19	19.2	5.20697	175.373	31.6	19.9	5.4	188.7	30.7	3335							0.00773994									68.2276	68.2276			0.49	30.5809			0.0372619	25.8772
2019-12-10_13:00:00	2019-12-10 23:00:01	0.04	61.37	21.32	0.01	0	0	291.97	-0.2	4.57	18.82	4.57437	177.494	23.1	19.2	4.6	194.1	27.3	3377							0.00773994									3.1684	18.49			0.1444	43.6921			0.000656678	13.3545
2019-12-10_14:00:00	2019-12-11 00:00:01	0.01	55.95	19.92	0.01	0	0	291.72	-0.24	4.33	18.57	4.33665	176.827	16.6	19	4.2	193.7	21	3822							0.00773994									11.0224	148.84			0.1849	49.8436			0.0186722	9.10015
2019-12-10_15:00:00	2019-12-11 01:00:01	0.01	52.65	19.1	0.01	0	0	291.44	-0.3	4.28	18.29	4.2905	175.99	13	18.8	3.9	196.3	21	3449							0.00773994									37.21	276.224			0.2601	56.8516			0.152491	7.13158
2019-12-10_16:00:00	2019-12-11 02:00:01	0.01	47.47	17.37	0.02	0	0	291.25	-0.28	3.95	18.1	3.95991	175.945	13.9	18.9	3.4	198.1	29.1	3193							0.0154799									12.0409	304.502			0.64	58.2169			0.313501	3.38527
2019-12-10_17:00:00	2019-12-11 03:00:01	0.01	41.58	15.35	0.02	0	0	291.05	-0.54	3.83	17.9	3.86788	171.975	7.3	18.5	2.8	203.6	36.9	2727							0.0154799									64.8025	679.645			0.36	67.7329			1.14037	1.31763
2019-12-10_18:00:00	2019-12-11 04:00:01	0.01	41	15.13	0.03	0	0	290.79	-0.83	3.84	17.64	3.92868	167.803	20.4	18.7	2.2	210.2	44.6	3970							0.0232198									27.7729	173.976			1.1236	68.7241			2.98832	2.98832
2019-12-10_19:00:00	2019-12-11 05:00:01	0.01	39.9	14.89	0.02	0	0	290.69	-1.05	3.87	17.54	4.00991	164.82	15.6	18.8	2	214.6	48.9	846							0.0154799									0.5041	332.333			1.5876	68.7241			4.03975	4.03975
2019-12-10_20:00:00	2019-12-11 06:00:01	0.01	38.87	14.65	0.02	0	0	291.81	-1.48	4.69	18.66	4.91798	162.486	8.6	18.7	1.8	218	44.4	638							0.0154799									36.6025	648.721			0.0016	52.8529			9.72178	9.72178
2019-12-10_21:00:00	2019-12-11 07:00:01	0	38.94	14.57	0.01	0	0	292.3	-1.77	4.42	19.15	4.76123	158.176	16.9	18.8	1.9	213.5	47	328							0.00773994									5.4289	297.562			0.1225	44.6224			8.18663	8.18663
2019-12-10_22:00:00	2019-12-11 08:00:01	0	36.66	13.77	0	0	0	292.91	-1.33	4.28	19.76	4.48189	162.737	18.5	19.4	1.9	213.9	51.7	182							0									22.3729	270.602			0.1296	29.9209			6.66613	6.66613
2019-12-10_23:00:00	2019-12-11 09:00:01	0	37.78	14.23	0	0	0	292.69	-1.76	4.71	19.54	5.02809	159.511	18.4	20	2.3	210.8	50.3	155							0									17.3889	258.888			0.2116	25.9081			7.44248	7.44248
2019-12-11_00:00:00	2019-12-11 10:00:01	0	32.17	12.49	0	0	0	293.26	-1.66	4.43	20.11	4.7308	159.458	14.9	21	2.8	188.9	54.2	143							0									5.8081	454.969			0.7921	12.3904			3.728	4.04333
2019-12-11_01:00:00	2019-12-11 11:00:01	0	28.24	11.07	0.01	0	0	293.8	-1.73	4.34	20.65	4.6721	158.267	17.5	21.2	3.4	185.5	45.6	149							0.00773994									41.3449	406.022			0.3025	7.7284			1.61823	6.5132
2019-12-11_02:00:00	2019-12-11 12:00:01	0	28.49	11.15	0	0	0	294.08	-1.96	4.19	20.93	4.62576	154.931	8.4	21.3	4	181.6	39.7	143							0									7.5625	850.889			0.1369	5.76			0.391582	9.64578
2019-12-11_03:00:00	2019-12-11 13:00:01	0	31.12	12.09	0	0	0	294.08	-2.36	4.15	20.93	4.77411	150.374	18.8	21.8	3.4	174.1	38.6	146							0									45.0241	317.909			0.7569	3.61			1.88817	7.04429
2019-12-11_04:00:00	2019-12-11 14:00:01	0	32.95	12.73	0	0	0	293.92	-2.75	3.89	20.77	4.76388	144.742	24.8	21.5	3.8	165.3	35.6	188							0									145.685	145.685			0.5329	5.5696			0.929074	9.26524
2019-12-11_05:00:00	2019-12-11 15:00:01	0	34.96	13.53	0	0	0	293.82	-3.3	3.45	20.67	4.77415	136.273	13.4	21.3	4	157.2	34.1	249							0									0.0169	474.804			0.3969	7.0756			0.599307	10.5895
2019-12-11_06:00:00	2019-12-11 16:00:01	0.01	35.22	13.77	0	0	0	294.01	-3.62	2.65	20.86	4.4863	126.206	15.2	21	3.5	157	40.3	375							0									2.0449	390.062			0.0196	7.6729			0.97279	6.08264
2019-12-11_07:00:00	2019-12-11 17:00:01	0.01	35.77	14.12	0	0	0	293.74	-3.95	1.66	20.59	4.28464	112.795	15.2	20.4	4	149.7	39.5	427							0									1.1664	376.36			0.0361	13.2496			0.0810173	7.64321
2019-12-11_08:00:00	2019-12-11 18:00:01	0.01	35.68	14.2	0	0	0	293.24	-3.98	0.95	20.09	4.09181	103.425	13.5	20.1	3.5	149	41.3	374							0									0.49	441.84			0.0001	19.7136			0.350238	4.29239
2019-12-11_09:00:00	2019-12-11 19:00:01	0.02	35.98	14.38	0	0	0	292.49	-2.94	0.6	19.34	3.0006	101.534	9.7	19.9	2.6	162.9	40.6	406							0									21.9024	607.13			0.3136	29.0521			0.16048	0.16048
2019-12-11_10:00:00	2019-12-11 20:00:01	0.02	37.26	15	0	0	0	292.83	-3.26	0.07	19.68	3.26075	91.2299	11.8	19.6	2.1	177.7	33.5	350							0									10.24	480.486			0.0064	28.6225			1.34734	1.34734
2019-12-11_11:00:00	2019-12-11 21:00:01	0.02	37.91	15.29	0	0	0	292.16	-2.21	-0.08	19.01	2.21145	87.927	14.2	19.5	2.4	187.5	28	371							0									1.1881	369.793			0.2401	37.4544			0.035552	0.825468
2019-12-11_12:00:00	2019-12-11 22:00:01	0.02	36.48	14.73	0	0	0	291.06	-2.04	-0.13	17.91	2.04414	86.3539	11.8	19.5	2.5	190.9	25.7	293							0									8.5849	492.396			2.5281	52.1284			0.20781	0.952307
2019-12-11_13:00:00	2019-12-11 23:00:01	0.02	34.66	14.04	0.01	0	0	290.53	-2.06	-0.25	17.38	2.07511	83.0806	12.9	19.5	2.3	195	24.8	255							0.00773994									1.2996	474.368			4.4944	60.0625			0.0505735	1.31076
2019-12-11_14:00:00	2019-12-12 00:00:01	0.03	33.62	13.64	0.01	0	0	290.12	-2	-0.54	16.97	2.07162	74.8906	12.3	19.5	2.6	191.9	17	342							0.00773994									1.7956	518.928			6.4009	66.5856			0.279188	0.719752
2019-12-11_15:00:00	2019-12-12 01:00:01	0.04	32.8	13.31	0.01	0	0	289.76	-1.82	-0.35	16.61	1.85335	79.1146	14.7	19.5	2.7	193	17.2	372							0.00773994									1.9321	428.904			8.3521	72.5904			0.716819	0.934415
2019-12-11_16:00:00	2019-12-12 02:00:01	0.05	32.13	13.02	0.01	0	0	291.19	-1.22	-0.06	18.04	1.22147	87.1846	19.3	19.4	2.5	187.6	24.7	387							0.00773994									39.4384	268.96			1.8496	51.6961			1.63463	3.23469
2019-12-11_17:00:00	2019-12-12 03:00:01	0.05	31.7	12.84	0.01	0	0	291.55	-1.31	0.12	18.4	1.31548	95.2337	13.6	19.3	2.4	188.7	29.3	519							0.00773994									0.5776	496.398			0.81	48.0249			1.17617	3.25628
2019-12-11_18:00:00	2019-12-12 04:00:01	0.05	31.49	12.72	0.01	0	0	291.59	-1.26	0.24	18.44	1.28265	100.784	19.1	19	2.5	189.5	36.1	441							0.00773994									40.7044	285.61			0.3136	51.6961			1.48193	3.01837
2019-12-11_19:00:00	2019-12-12 05:00:01	0.05	31.68	12.75	0.01	0	0	291.79	-1.47	0.51	18.64	1.55596	109.134	20.7	18.6	2.3	197.7	30.5	404							0.00773994									63.2025	233.173			0.0016	54.6121			0.553601	2.76904
2019-12-11_20:00:00	2019-12-12 06:00:01	0.06	31.77	12.85	0.02	0	0	292.47	-2.32	0.72	19.32	2.42916	107.241	17.8	19.1	2.4	190.7	33.6	436							0.0154799									24.5025	326.525			0.0484	38.5641			0.000850086	0.477265
2019-12-11_21:00:00	2019-12-12 07:00:01	0.05	31.4	12.9	0.02	0	0	292.96	-2.74	0.69	19.81	2.82554	104.134	17.8	19.3	2.4	184.1	32.7	543							0.0154799									24.01	324.72			0.2601	30.4704			0.181088	0.181088
2019-12-11_22:00:00	2019-12-12 08:00:01	0.04	31.05	12.86	0.02	0	0	293.27	-2.86	1.08	20.12	3.05712	110.688	15.5	19.2	2.4	178.7	25.7	593							0.0154799									6.9696	414.53			0.8464	28.1961			0.43181	0.43181
2019-12-11_23:00:00	2019-12-12 09:00:01	0.04	30.08	12.72	0.03	0	0	293.64	-2.9	1.28	20.49	3.16992	113.816	12.8	19.2	2	165.1	32.5	321							0.0232198									0.0064	538.24			1.6641	24.4036			1.36872	1.36872
2019-12-12_00:00:00	2019-12-12 10:00:01	0.06	29.11	12.62	0.04	0	0	294.25	-2.96	1.59	21.1	3.36001	118.243	4.8	19.8	1.9	172.1	27.9	327							0.0309598									61.1524	979.69			1.69	13.9129			2.13164	2.13164
2019-12-12_01:00:00	2019-12-12 11:00:01	0.07	28.7	12.58	0.04	0	0	294.72	-3.42	1.21	21.57	3.62774	109.484	9.4	20.9	2.6	160	28.2	457							0.0309598									10.1124	715.028			0.4489	4.6656			1.05625	1.05625
2019-12-12_02:00:00	2019-12-12 12:00:01	0.07	28.35	12.46	0.04	0	0	295.25	-3.85	1.4	22.1	4.09664	109.983	21.4	21.4	3.3	152.3	25.1	473							0.0309598									79.9236	220.82			0.49	1.2769			0.634643	3.5218
2019-12-12_03:00:00	2019-12-12 13:00:01	0.07	28	12.33	0.04	0	0	295.32	-4.03	1.78	22.17	4.4056	113.83	29.2	21.3	3.5	143.3	23	602							0.0309598									284.597	284.597			0.7569	1.3456			0.820109	5.69108
2019-12-12_04:00:00	2019-12-12 14:00:01	0.08	27.84	12.27	0.04	0	0	295.51	-4.4	1.32	22.36	4.59373	106.699		21.3	4.5	144.3		540							0.0309598									150.553	1328.6			1.1236	1.1236			0.00878622	12.7716
2019-12-12_05:00:00	2019-12-12 15:00:01	0.08	27.89	12.28	0.04	0	0	295.57	-5.14	0.92	22.42	5.22169	100.148		21.3	4.5	142.4		671							0.0309598									150.798	1327.87			1.2544	1.2544			0.52083	17.6542
2019-12-12_06:00:00	2019-12-12 16:00:01	0.08	27.98	12.36	0.04	0	0	295.21	-5.5	0.08	22.06	5.50058	90.8332		20.9	4.2	149.2		559							0.0309598									152.77	1322.05			1.3456	2.7889			1.69151	17.4773
2019-12-12_07:00:00	2019-12-12 17:00:01	0.06	28.04	12.33	0.04	0	0	294.84	-5.44	0.03	21.69	5.44008	90.3158		21	4.4	141.9		506							0.0309598									152.029	1324.23			0.4761	3.7636			1.08177	18.6631
2019-12-12_08:00:00	2019-12-12 18:00:01	0.04	28.37	12.27	0.03	0	0	294.24	-4.98	-0.07	21.09	4.98049	89.1948		20.6	4.1	134.9		405							0.0232198									150.553	1328.6			0.2401	8.6436			0.775266	12.6771
2019-12-12_09:00:00	2019-12-12 19:00:01	0.04	28.27	12.18	0.02	0	0	293.56	-4.03	-0.4	20.41	4.0498	84.3318		20.3	3.3	120.6		404							0.0154799									148.352	1335.17			0.0121	15.3664			0.562204	3.34818
2019-12-12_10:00:00	2019-12-12 20:00:01	0.04	27.86	12.12	0.03	0	0	293.16	-3.44	0.08	20.01	3.44093	91.3321		20.1	3.2	125.4		408							0.0232198									146.894	1339.56			0.0081	20.4304			0.0580473	1.25648
2019-12-12_11:00:00	2019-12-12 21:00:01	0.04	27.41	12.16	0.03	0	0	292.77	-2.8	0.41	19.62	2.82986	98.3304		20.1	3	136.1		374							0.0232198									147.866	1336.63			0.2304	24.1081			0.0289481	0.0960124
2019-12-12_12:00:00	2019-12-12 22:00:01	0.04	26.83	12.09	0.04	0	0	292.35	-2.36	0.9	19.2	2.52579	110.875		20.2	2.8	137.8		330							0.0309598									146.168	1341.76			1	27.3529			0.0751928	0.0751928
2019-12-12_13:00:00	2019-12-12 23:00:01	0.04	25.89	11.84	0.04	0	0	291.84	-2.04	1.06	18.69	2.29896	117.457		20.1	2.8	150.1		387							0.0309598									140.186	1360.13			1.9881	34.1056			0.251045	0.251045
2019-12-12_14:00:00	2019-12-13 00:00:01	0.04	24.49	11.35	0.04	0	0	291.46	-1.89	1.39	18.31	2.3461	126.332		20	2.9	155.3		440							0.0309598									128.822	1396.52			2.8561	39.9424			0.306802	0.306802
2019-12-12_15:00:00	2019-12-13 01:00:01	0.03	22.87	10.67	0.04	0	0	291.04	-1.94	1.38	17.89	2.38076	125.426		19.9	2.2	166.6		418							0.0309598									113.849	1447.8			4.0401	46.7856			0.0326728	0.882179
2019-12-12_16:00:00	2019-12-13 02:00:01	0.02	21.5	10.01	0.04	0	0	290.8	-2.02	1.39	17.65	2.45204	124.532		19.7	1.7	160.8		527							0.0309598									100.2	1498.46			4.2025	52.9984			0.565564	1.87131
2019-12-12_17:00:00	2019-12-13 03:00:01	0.02	20.61	9.54	0.04	0	0	290.65	-1.97	1.6	17.5	2.53789	129.083		19.7	2.5	151.3		409							0.0309598									91.0116	1535.07			4.84	55.2049			0.00143587	0.232427
2019-12-12_18:00:00	2019-12-13 04:00:01	0.02	20.38	9.29	0.03	0	0	291.98	-1.85	1.93	18.83	2.67346	136.212		19.7	2.1	151.7		396							0.0232198									86.3041	1554.72			0.7569	37.21			0.328859	0.557319
2019-12-12_19:00:00	2019-12-13 05:00:01	0.01	20.69	9.18	0.02	0	0	292.25	-2.02	2.4	19.1	3.13694	139.914		19.7	2.7	134		351							0.0154799									84.2724	1563.41			0.36	33.9889			0.190918	0.190918
2019-12-12_20:00:00	2019-12-13 06:00:01	0.01	21.5	9.49	0.02	0	0	292.47	-2.7	3.14	19.32	4.14121	139.309		19.8	2	122.8		367							0.0154799									90.0601	1538.99			0.2304	30.3601			4.58477	4.58477
2019-12-12_21:00:00	2019-12-13 07:00:01	0	22.71	10.42	0.02	0	0	293.27	-3.11	3.62	20.12	4.77247	139.333		19.9	1.7	118.2		397							0.0154799									108.576	1466.89			0.0484	21.2521			9.44009	9.44009
2019-12-12_22:00:00	2019-12-13 08:00:01	0	23.46	10.86	0.02	0	0	293.18	-3.66	2.71	20.03	4.55409	126.518		20.1	1.6	74.8		292							0.0154799									117.94	1433.38			0.0049	20.25			8.72662	8.72662
2019-12-12_23:00:00	2019-12-13 09:00:01	0	22.07	10.43	0.02	0	0	293.54	-3.38	2.2	20.39	4.03291	123.059		19.9	1.9	96.5		227							0.0154799									108.785	1466.12			0.2401	18.8356			4.54932	4.54932
2019-12-13_00:00:00	2019-12-13 10:00:01	0	20.26	9.73	0.03	0	0	294.34	-3.29	2.54	21.19	4.1564	127.669		20.1	1.4	131.9		261							0.0232198									94.6729	1520.22			1.1881	11.1556			7.59777	7.59777
2019-12-13_01:00:00	2019-12-13 11:00:01	0	18.92	8.98	0.03	0	0	294.32	-3.14	2.84	21.17	4.23382	132.128	12.1	21.2	1.4	107.1	19.5	222							0.0232198									9.7344	763.97			0.0009	5.1076			8.03051	8.03051
2019-12-13_02:00:00	2019-12-13 12:00:01	0	18.28	8.53	0.03	0	0	294.83	-3.51	2.92	21.68	4.5658	129.757	7.4	21.4	1.9	97.8	25	70							0.0232198									1.2769	1075.18			0.0784	2.4025			7.10647	7.10647
2019-12-13_03:00:00	2019-12-13 13:00:01	0	17.81	8.19	0.03	0	0	294.84	-4.07	2.76	21.69	4.91757	124.142	3.4	21.3	3.2	111.6	15.9	58							0.0232198									22.9441	1378.64			0.1521	2.6896			2.95005	6.74737
2019-12-13_04:00:00	2019-12-13 14:00:01	0	17.41	7.88	0.03	0	0	295.03	-4.74	2.28	21.88	5.25985	115.688	4.4	21.7	4.1	108.7	27.5	73							0.0232198									12.1104	1327.87			0.0324	1.1025			1.34525	14.7444
2019-12-13_05:00:00	2019-12-13 15:00:01	0	17.28	7.63	0.03	0	0	294.79	-5.4	1.44	21.64	5.5887	104.931	-1.9	22.2	3.9	90.6	15.3	118							0.0232198									90.8209	1848.14			0.3136	0.6241			2.85172	15.7506
2019-12-13_06:00:00	2019-12-13 16:00:01	0	17.29	7.55	0.02	0	0	294.76	-5.86	0.65	21.61	5.89594	96.3293	8.6	22.1	4	78.7	22.7	149							0.0154799									1.1025	1060.8			0.2401	0.8464			3.59459	19.1488
2019-12-13_07:00:00	2019-12-13 17:00:01	0	17.61	7.73	0.02	0	0	294.35	-5.35	0.35	21.2	5.36144	93.7428	8.4	21.7	3.7	85.7	24.8	288							0.0154799									0.4489	1062.11			0.25	2.9929			2.76037	12.5418
2019-12-13_08:00:00	2019-12-13 18:00:01	0	18.24	8.17	0.02	0	0	293.81	-5.01	0.01	20.66	5.01001	90.1142	5	21.2	3.5	84.8	22.3	306							0.0154799									10.0489	1263.8			0.2916	7.6729			2.28013	8.94016
2019-12-13_09:00:00	2019-12-13 19:00:01	0	19.16	8.72	0.02	0	0	292.97	-3.99	-0.23	19.82	3.99662	86.701	4.7	20.9	2.4	64	24.6	256							0.0154799									16.1604	1246.09			1.1664	15.2881			2.54921	2.54921
2019-12-13_10:00:00	2019-12-13 20:00:01	0	19.89	9.11	0.02	0	0	292.61	-3.6	-0.37	19.46	3.61896	84.132	9.5	20.7	2.7	58.9	21.9	237							0.0154799									0.1521	906.612			1.5376	19.9809			0.844495	0.844495
2019-12-13_11:00:00	2019-12-13 21:00:01	0	20.64	9.54	0.02	0	0	292.61	-3.08	-0.57	19.46	3.1323	79.5153	5.7	20.6	2.2	70	22.6	266							0.0154799									14.7456	1120.91			1.2996	20.8849			0.869182	0.869182
2019-12-13_12:00:00	2019-12-13 22:00:01	0	21.41	9.84	0.02	0	0	293.04	-2.54	-0.28	19.89	2.55539	83.7095	3.7	20.5	2.8	58.6	20.3	222							0.0154799									37.6996	1237.63			0.3721	17.9776			0.0598358	0.0598358
2019-12-13_13:00:00	2019-12-13 23:00:01	0	21.38	9.8	0.02	0	0	293.16	-2.4	-0.02	20.01	2.40008	89.5227	6.7	20.5	2.2	59.4	23.2	168							0.0154799									9.61	1038.13			0.2401	16.9744			0.0400333	0.846247
2019-12-13_14:00:00	2019-12-14 00:00:01	0	20.9	9.62	0.02	0	0	293.18	-2.42	-0.09	20.03	2.42167	87.8703	6.2	20.3	1.9	59.2	21.8	254							0.0154799									11.6964	1082.41			0.0729	18.49			0.272143	1.43599
2019-12-13_15:00:00	2019-12-14 01:00:01	0	20.24	9.43	0.03	0	0	292.81	-2.72	-0.08	19.66	2.72118	88.3155	5.6	20.2	1.5	67.6	22.5	322							0.0232198									14.6689	1135.02			0.2916	22.7529			1.49127	1.68694
2019-12-13_16:00:00	2019-12-14 02:00:01	0	19.61	9.3	0.03	0	0	292.76	-2.6	-0.11	19.61	2.60233	87.5775	6.4	20.3	1.4	65.9	24.4	410							0.0232198									8.41	1090.32			0.4761	22.2784			1.44559	2.30333
2019-12-13_17:00:00	2019-12-14 03:00:01	0	19.31	9.24	0.03	0	0	291.52	-2.15	-0.23	18.37	2.16227	83.8941	8.2	20	1.7	53.1	18.1	394							0.0232198									1.0816	978.438			2.6569	39.1876			0.213691	2.74808
2019-12-13_18:00:00	2019-12-14 04:00:01	0	19.18	9.16	0.03	0	0	291.15	-2.11	-0.13	18	2.114	86.4745	8.1	19.8	1.3	57.6	18	398							0.0232198									1.1236	989.732			3.24	46.6489			0.662598	4.43523
2019-12-13_19:00:00	2019-12-14 05:00:01	0	19.48	9.17	0.03	0	0	291.28	-1.81	-0.06	18.13	1.81099	88.1015	7.5	19.8	1.1	50.4	22.5	339							0.0232198									2.7889	1027.2			2.7889	44.89			0.505513	6.80691
2019-12-13_20:00:00	2019-12-14 06:00:01	0	20.49	9.42	0.03	0	0	293.22	-1.36	0.02	20.07	1.36015	90.8424	3.1	19.9	1.2	14.1	27.6	403							0.0232198									39.9424	1310.44			0.0289	21.7156			0.0256471	8.76073
2019-12-13_21:00:00	2019-12-14 07:00:01	0.01	21.74	10	0.04	0	0	294.07	-0.79	-0.33	20.92	0.856154	67.3288	12.2	20.7	2	358.9	35.4	379							0.0309598									4.84	703.31			0.0484	9.0601			1.30838	7.09607
2019-12-13_22:00:00	2019-12-14 08:00:01	0.01	22.78	10.43	0.04	0	0	295.04	-0.49	-0.38	21.89	0.620081	52.2062	12.4	22	2.3	2	33.3	520							0.0309598									3.8809	670.292			0.0121	0.5476			2.82213	6.75958
2019-12-13_23:00:00	2019-12-14 09:00:01	0.01	22.93	10.44	0.04	0	0	295.74	-0.6	0.22	22.59	0.639062	110.136	16.1	23	3	345.9	18.7	225							0.0309598									32.0356	491.952			0.1681	0.9216			5.57403	5.57403
2019-12-14_00:00:00	2019-12-14 10:00:01	0.01	22.75	10.32	0.04	0	0	295.93	-1.07	1.37	22.78	1.73833	142.009	14.2	23.9	2.5	348.1	22.7	314							0.0309598									15.0544	585.64			1.2544	4.2025			0.580137	1.64267
2019-12-14_01:00:00	2019-12-14 11:00:01	0.01	22.69	10.27	0.04	0	0	297.02	-1.68	1.84	23.87	2.49159	137.602	17.4	25.5	2	40.9	29.1	374							0.0309598									50.8369	443.103			2.6569	22.4676			0.241657	1.05764
2019-12-14_02:00:00	2019-12-14 12:00:01	0.01	22.33	10.17	0.04	0	0	297.93	-2.72	1.43	24.78	3.073	117.732	15.9	24.7	4	101.2	39.5	230							0.0309598									32.8329	513.022			0.0064	23.5225			0.859338	2.41179
2019-12-14_03:00:00	2019-12-14 13:00:01	0.01	22.64	10.37	0.04	0	0	298.41	-3.71	0.87	25.26	3.81064	103.197	19.5	24.6	4.5	103.6	25.7	237							0.0309598									83.3569	355.323			0.4356	27.3529			0.475213	7.78769
2019-12-14_04:00:00	2019-12-14 14:00:01	0.02	23.41	10.92	0.05	0	0	298.62	-4.63	0.03	25.47	4.6301	90.3711	17.9	24.4	4.6	101.6	25.2	291							0.0386997									48.7204	396.01			1.1449	27.4576			0.000905841	13.7648
2019-12-14_05:00:00	2019-12-14 15:00:01	0.03	24.18	11.74	0.07	0	0	298.33	-5.48	-1.01	25.18	5.5723	79.5573	10.5	24.3	4.3	68.5	27.5	383							0.0541796									1.5376	701.19			0.7744	23.5225			1.61874	18.9425
2019-12-14_06:00:00	2019-12-14 16:00:01	0.04	24.24	12.08	0.08	0	0	297.94	-5.72	-1.71	24.79	5.97013	73.356	9.9	23.6	4.3	78.6	26.9	948							0.0619195									4.7524	715.028			1.4161	14.1376			2.78935	22.5638
2019-12-14_07:00:00	2019-12-14 17:00:01	0.04	24.28	12.27	0.08	0	0	297.42	-5.59	-2.43	24.27	6.09533	66.5053	10.2	22.9	4	85.4	22.8	686							0.0619195									4.2849	689.062			1.8769	6.4516			4.39039	20.9336
2019-12-14_08:00:00	2019-12-14 18:00:01	0.05	24.83	12.68	0.09	0	0	296.65	-4.71	-3.15	23.5	5.66627	56.2259	9.5	22.5	3.9	87	22.2	509							0.0696594									10.1124	704.372			1	1.8769			3.1197	16.3723
2019-12-14_09:00:00	2019-12-14 19:00:01	0.05	25.22	12.98	0.1	0	0	295.88	-3.26	-3.68	22.73	4.9163	41.5369	10	22.1	3.3	89.3	24.8	480							0.0773994									8.8804	662.548			0.3969	0.3969			2.61242	7.27003
2019-12-14_10:00:00	2019-12-14 20:00:01	0.07	25.98	13.46	0.12	0	0	295.18	-2.36	-3.29	22.03	4.04891	35.6529	8.8	21.8	2.3	111.9	26.2	738							0.0928793									21.7156	700.132			0.0529	0.64			3.0587	3.0587
2019-12-14_11:00:00	2019-12-14 21:00:01	0.07	26.07	13.59	0.13	0	0	294.28	-1.79	-0.47	21.13	1.85068	75.2881	7.6	21.3	2	154.5	28.3	493							0.100619									35.8801	757.901			0.0289	4.84			0.0222978	2.78664
2019-12-14_12:00:00	2019-12-14 22:00:01	0.08	26.25	13.74	0.13	0	0	294.15	-2.72	0.28	21	2.73437	95.8772	4.1	21.5	2.7	145.5	23.9	366							0.100619									92.9296	953.574			0.25	4.5369			0.00118156	0.00733185
2019-12-14_13:00:00	2019-12-14 23:00:01	0.09	26.75	13.97	0.14	0	0	293.95	-2.95	0.6	20.8	3.0104	101.496	9.3	21.3	1.9	166.4	24.8	353							0.108359									21.8089	647.702			0.25	6.4009			1.23299	1.23299
2019-12-14_14:00:00	2019-12-15 00:00:01	0.1	27.43	14.27	0.15	0	0	293.78	-3.05	0.69	20.63	3.12708	102.747	8	21.1	1.8	151.6	18.8	407							0.116099									39.3129	699.602			0.2209	8.41			1.76113	1.76113
2019-12-14_15:00:00	2019-12-15 01:00:01	0.11	28.92	14.74	0.16	0	0	293.38	-2.24	1.55	20.23	2.72399	124.682	10.9	20.5	0.8	172.9	16.9	402							0.123839									14.7456	532.686			0.0729	15.21			3.70172	3.98407
2019-12-14_16:00:00	2019-12-15 02:00:01	0.1	32	15.67	0.15	0	0	293.24	-1.17	2.4	20.09	2.67	154.011	11.4	20.1	0.6	200.1	15	420							0.116099									18.2329	468.722			0.0001	19.7136			4.2849	5.0625
2019-12-14_17:00:00	2019-12-15 03:00:01	0.09	34.33	16.37	0.14	0	0	293.14	-1.08	2.53	19.99	2.75087	156.883	8.1	20	0.9	198.9	15.2	375							0.108359									68.3929	588.062			0.0001	21.5296			3.42573	3.49364
2019-12-14_18:00:00	2019-12-15 04:00:01	0.07	36.53	16.84	0.12	0	0	293.06	-1.08	2.87	19.91	3.06648	159.378	7.1	19.8	1.1	198.7	24.4	427							0.0928793									94.8676	614.048			0.0121	24.2064			3.86704	3.86704
2019-12-14_19:00:00	2019-12-15 05:00:01	0.05	38.05	16.9	0.1	0	0	292.96	-1.17	3.05	19.81	3.26671	159.013	-2.2	19.7	0.6	232.8	21.9	355							0.0773994									364.81	1157.36			0.0121	26.2144			7.11135	7.11135
2019-12-14_20:00:00	2019-12-15 06:00:01	0.04	37.81	16.47	0.09	0	0	294.04	-1.41	3.25	20.89	3.54268	156.546	2.7	19.9	0.7	305.6	26.5	376							0.0696594									189.613	873.202			0.9801	14.7456			8.08084	8.08084
2019-12-14_21:00:00	2019-12-15 07:00:01	0.04	36.26	15.96	0.09	0	0	294.71	-1.22	2.92	21.56	3.16462	157.324	7.8	21.7	0.7	182.9	25.6	353							0.0696594									66.5856	623.002			0.0196	1.8769			6.07434	6.07434
2019-12-14_22:00:00	2019-12-15 08:00:01	0.04	34.36	15.45	0.09	0	0	295.47	-0.8	2.6	22.32	2.72029	162.897	10.1	22.3	1.7	144.9	29.1	326							0.0696594									28.6225	536.849			0.0004	0.0004			1.041	1.20935
2019-12-14_23:00:00	2019-12-15 09:00:01	0.05	32.14	14.89	0.09	0	0	296.12	-0.55	2.61	22.97	2.66732	168.1	13.8	22.8	2.3	145.3	23.8	274							0.0696594									1.1881	401.201			0.0289	1.2996			0.134925	0.305454
2019-12-15_00:00:00	2019-12-15 10:00:01	0.05	30.28	14.47	0.1	0	0	296.8	-0.79	2.45	23.65	2.57422	162.128	12.5	23.1	2.4	150.9	25.1	303							0.0773994									3.8809	473.062			0.3025	4.4944			0.030352	0.297878
2019-12-15_01:00:00	2019-12-15 11:00:01	0	0.06	0	0	0	0	298.99	-2.78	1.26	25.84	3.05221	114.382	12.1	23.6	3.1	138.6	24	373							0									146.41	1341.02			5.0176	23.1361			0.00228366	0.399692
2019-12-15_02:00:00	2019-12-15 12:00:01	0	0.12	0.02	0	0	0	298.51	-4.32	1.14	25.36	4.46789	104.783	8.5	23.8	3.6	119.7	20.3	350							0									71.9104	1616.04			2.4336	20.5209			0.753225	6.49172
2019-12-15_03:00:00	2019-12-15 13:00:01	0	0.09	0.01	0	0	0	298.68	-5.12	-0.33	25.53	5.13062	86.3124	2.8	24.7	3.7	88.4	36.3	394							0									7.7841	2107.73			0.6889	31.36			2.04668	10.9602
2019-12-15_04:00:00	2019-12-15 14:00:01	0	0.13	0.03	0	0	0	299.35	-5.48	-1.41	26.2	5.65849	75.571	8.4	24.7	4	67.8	45.7	387							0									70.0569	1623.28			2.25	39.3129			2.75059	17.1271
2019-12-15_05:00:00	2019-12-15 15:00:01	0	0.34	0.09	0	0	0	299.27	-5.98	-1.96	26.12	6.29301	71.8531	12.5	24.1	4.3	68.8	34.1	544							0									154.008	1305.38			4.0804	31.2481			3.9721	25.7355
2019-12-15_06:00:00	2019-12-15 16:00:01	0	0.52	0.15	0	0	0	299.18	-5.76	-2.5	26.03	6.27914	66.5379	6.8	23.5	4.4	61.1	19	480							0									44.2225	1744.73			6.4009	24.01			3.53117	26.6167
2019-12-15_07:00:00	2019-12-15 17:00:01	0	0.73	0.21	0	0	0	298.28	-4.95	-2.94	25.13	5.75726	59.2924	8.1	23.7	3.6	57.2	25.3	341							0									62.2521	1632.97			2.0449	17.64			4.65379	14.7246
2019-12-15_08:00:00	2019-12-15 18:00:01	0	0.88	0.24	0	0	0	298.39	-4.04	-3.49	25.24	5.3387	49.1776	11	24.3	2	84.6	36.5	388							0									115.778	1404.75			0.8836	24.1081			11.1469	11.1469
2019-12-15_09:00:00	2019-12-15 19:00:01	0	1.02	0.28	0	0	0	296.82	-2.42	-2.77	23.67	3.67822	41.1421	16.4	23.5	1.9	135.6	34.9	363							0									259.854	1026.56			0.0289	6.4516			3.16207	3.16207
2019-12-15_10:00:00	2019-12-15 20:00:01	0	1.07	0.31	0	0	0	295.49	-2.55	-1.77	22.34	3.10409	55.2349	13.2	23.3	2.2	52.5	30.6	426							0									166.152	1239.74			0.9216	1.0201			0.817386	0.817386
2019-12-15_11:00:00	2019-12-15 21:00:01	0	1.07	0.34	0	0	0	294.95	-2.67	-2.27	21.8	3.50454	49.6294	11.7	23	2.2	37.4	26.3	391							0									129.05	1345.42			1.44	1.44			1.70182	1.70182
2019-12-15_12:00:00	2019-12-15 22:00:01	0	2.93	2.2	0.11	0	0	294.04	-1.59	-2.15	20.89	2.67406	36.4843	11.3	23	1.1	337	33.5	562							0.0851393									82.81	1240.45			4.4521	4.4521			2.47767	3.0483
2019-12-15_13:00:00	2019-12-15 23:00:01	0	11.32	9.19	0.5	0	0	293.67	0.42	-1.96	20.52	2.00449	347.905	7.9	23.7	1.8	320.4	23.4	613							0.386997									1.6641	1000.46			10.1124	10.1124			0.0418182	2.94296
2019-12-15_14:00:00	2019-12-16 00:00:01	0	21.18	16.5	0.91	0.01	0.02	291.6	2.51	-0.81	18.45	2.63746	287.885	12.8	23.1	1.7	311.2	18.2	444							0.704334									13.69	377.136			21.6225	21.6225			0.878833	1.3984
2019-12-15_15:00:00	2019-12-16 01:00:01	0	32.27	24.59	1.36	0.01	0.05	291.16	2.98	-0.42	18.01	3.00945	278.022	13.6	23.2	1.4	314.9	20	390							1.05263									120.78	120.78			26.9361	26.9361			2.59034	2.59034
2019-12-15_16:00:00	2019-12-16 02:00:01	0	19.64	13.55	0.75	0.01	0.04	291.25	3.23	-0.37	18.1	3.25112	276.535	12.5	22.7	1.5	316.5	22.1	431							0.580495									1.1025	513.929			21.16	21.16			3.06643	3.06643
2019-12-15_17:00:00	2019-12-16 03:00:01	0	17.78	11.52	0.64	0.01	0.04	290.95	3.22	0.73	17.8	3.30171	257.226	26.7	20.7	0.5	320.6	38.5	493							0.495356									230.432	230.432			8.41	37.5769			7.84959	7.84959
2019-12-15_18:00:00	2019-12-16 04:00:01	0	17.91	11.69	0.64	0.01	0.04	290.24	3.2	0.32	17.09	3.21596	264.289	49.2	20.1	1.5	193.3	109.5	432							0.495356									1407	1407			9.0601	55.3536			2.94452	2.94452
2019-12-15_19:00:00	2019-12-16 05:00:01	0	19.34	12.47	0.67	0.01	0.04	289.67	3.21	0.45	16.52	3.24139	262.02	63.8	20.7	5.2	188.6	78.1	802							0.518576									2634.77	2634.77			17.4724	54.9081			3.83616	8.53451
2019-12-15_20:00:00	2019-12-16 06:00:01	0	21.59	11.68	0.51	0.01	0.03	294.24	2.54	3	21.09	3.93085	220.253	58.9	20.4	4.6	190.7	60.2	541							0.394737									2229.73	2229.73			0.4761	9.8596			0.447759	9.06523
2019-12-15_21:00:00	2019-12-16 07:00:01	0	23.39	8.48	0.09	0	0.01	295.07	3	6.39	21.92	7.05919	205.149	44.6	20.7	4.6	190.6	49.8	851							0.0696594									1304.65	1304.65			1.4884	4.0401			6.04759	37.6896
2019-12-15_22:00:00	2019-12-16 08:00:01	0	32.76	10.89	0.02	0	0	295.66	3.22	7.48	22.51	8.14364	203.291	29.3	21.5	4.3	189.9	47.8	752							0.0154799									338.928	338.928			1.0201	1.0201			14.7735	47.9367
2019-12-15_23:00:00	2019-12-16 09:00:01	0	42.43	13.5	0	0	0	296.04	1.03	7.54	22.89	7.61003	187.779	23.2	22.4	3.9	184.9	45.6	802							0									94.09	144.48			0.2401	0.4356			13.7643	35.8804
2019-12-16_00:00:00	2019-12-16 10:00:01	0	44.81	14.13	0	0	0	295.71	-0.69	7.08	22.56	7.11354	174.434	26.2	22.2	3.7	181.8	39.2	834							0									145.685	145.685			0.1296	0.1296			11.6523	28.0216
2019-12-16_01:00:00	2019-12-16 11:00:01	0	31.11	9.76	0	0	0	295.56	-0.94	6.39	22.41	6.45877	171.631	19.4	22.2	3.4	172.5	41.3	1169							0									92.9296	382.594			0.0441	0.0441			9.35607	18.8249
2019-12-16_02:00:00	2019-12-16 12:00:01	0	26.91	8.56	0	0	0	295.68	-1.14	6.29	22.53	6.39247	169.727	13.8	22.8	3.5	176.1	39.8	2400							0									27.4576	694.85			0.0729	0.49			8.3664	19.1185
2019-12-16_03:00:00	2019-12-16 13:00:01	0	25.19	7.94	0	0	0	295.57	-1.73	6.45	22.42	6.67798	164.986	13.7	22.5	3.8	171.1	40.3	5742							0									33.1776	733.326			0.0064	0.0841			8.28276	24.5816
2019-12-16_04:00:00	2019-12-16 14:00:01	0	25.13	7.95	0	0	0	295.39	-1.86	6.4	22.24	6.6648	163.795	13.1	22.2	3.7	166.3	40.9	2414							0									26.5225	765.629			0.0016	0.0361			8.79006	23.4721
2019-12-16_05:00:00	2019-12-16 15:00:01	0	25.69	8.26	0	0	0	295.13	-2.01	6.1	21.98	6.42262	161.762	13.2	21.9	3.5	164.6	39.1	1316							0									24.4036	743.108			0.0064	0.5625			8.54173	19.3831
2019-12-16_06:00:00	2019-12-16 16:00:01	0	29.8	9.77	0	0	0	294.74	-2.03	5.59	21.59	5.94718	160.041	19.4	21.5	3.7	161.3	38.8	850							0									92.7369	382.203			0.0081	2.3716			5.04984	17.0336
2019-12-16_07:00:00	2019-12-16 17:00:01	0	35	11.71	0	0	0	294.23	-1.91	5.03	21.08	5.38043	159.207	16.5	21.1	3.1	164	33.6	719							0									22.9441	420.66			0.0004	6.0025			5.20035	8.76413
2019-12-16_08:00:00	2019-12-16 18:00:01	0	33.2	11.16	0	0	0	293.56	-1.76	4.83	20.41	5.14067	159.979	7.3	20.8	2.6	167.2	31.8	469							0									14.8996	915.668			0.1521	11.6964			6.45501	6.45501
2019-12-16_09:00:00	2019-12-16 19:00:01	0	38.06	12.89	0	0	0	292.69	-1.36	4.03	19.54	4.25329	161.352	6.3	20.2	2.4	168.2	40	284							0									43.4281	872.021			0.4356	23.9121			3.43469	3.43469
2019-12-16_10:00:00	2019-12-16 20:00:01	0	39.78	13.61	0	0	0	292.31	-1.63	3.79	19.16	4.12565	156.728	6.6	19.8	2.3	175.8	37.3	305							0									49.1401	812.82			0.4096	32.1489			3.333	3.333
2019-12-16_11:00:00	2019-12-16 21:00:01	0	36.04	11.99	0	0	0	292	-1.49	3.4	18.85	3.71216	156.335	13	19.9	2.1	180.2	33.8	308							0									1.0201	563.113			1.1025	34.5744			2.59905	2.59905
2019-12-16_12:00:00	2019-12-16 22:00:01	0	34.62	11.3	0	0	0	291.42	-1.19	2.82	18.27	3.0608	157.121	11.8	19.2	1.3	201.9	33.7								0									0.25	656.384			0.8649	51.2656			3.10042	3.10042
2019-12-16_13:00:00	2019-12-16 23:00:01	0	36.4	12.03	0	0	0	290.82	-1.18	2.61	17.67	2.86435	155.672	8.8	19.4	1.9	174.3	23.2	265							0									10.4329	777.852			2.9929	57.1536			0.929971	0.929971
2019-12-16_14:00:00	2019-12-17 00:00:01	0	38.61	12.86	0	0	0	290	-1.04	2.47	16.85	2.68002	157.166	9.1	19.5	1.9	173.2	25.8	337							0									14.1376	716.098			7.0225	68.5584			0.608429	0.883565
2019-12-16_15:00:00	2019-12-17 01:00:01	0	43.31	14.72	0	0	0	289.61	-1.1	2.49	16.46	2.72215	156.166	1.5	18.9	1.6	181.1	28.3	262							0									174.768	1056.25			5.9536	85.9329			1.25922	1.43484
2019-12-16_16:00:00	2019-12-17 02:00:01	0	46.73	16.1	0	0	0	289.41	-1.11	2.57	16.26	2.79946	156.64	2.1	18.7	1.5	179.2	26.8	223							0									196	931.47			5.9536	93.5089			1.68861	1.68861
2019-12-16_17:00:00	2019-12-17 03:00:01	0	43.69	15.04	0	0	0	289.1	-1.08	2.59	15.95	2.80615	157.364	12	18.2	1	198	25.7	184							0									9.2416	470.022			5.0625	109.83			3.26219	3.26219
2019-12-16_18:00:00	2019-12-17 04:00:01	0	36.89	12.66	0	0	0	288.71	-0.95	2.51	15.56	2.68377	159.269	6.9	17	0.7	253	21.6	129							0									33.1776	850.306			2.0736	145.685			3.93533	4.5635
2019-12-16_19:00:00	2019-12-17 05:00:01	0	32.66	11.23	0	0	0	288.53	-0.98	2.44	15.38	2.62945	158.118	8.4	16.3	0.5	272.2	20.9	134							0									8.0089	846.228			0.8464	167.703			4.53455	5.71474
2019-12-16_20:00:00	2019-12-17 06:00:01	0	31.09	10.71	0	0	0	292.58	-1.01	2.19	19.43	2.41168	155.241	4.9	17.6	1	220.5	20.6	88							0									33.7561	1096.27			3.3489	57.76			1.99284	4.44501
2019-12-16_21:00:00	2019-12-17 07:00:01	0	29.92	10.35	0	0	0	293.37	-1.56	2.57	20.22	3.00641	148.742	5.1	19.8	1.5	201.4	20.5	76							0									27.5625	1106.89			0.1764	21.2521			2.26927	2.26927
2019-12-16_22:00:00	2019-12-17 08:00:01	0	28.27	9.86	0	0	0	293.9	-1.85	2.74	20.75	3.30607	145.973	8.3	20.8	2.2	182.4	28.5	23							0									2.4336	933.914			0.0025	9.4864			1.22339	1.22339
2019-12-16_23:00:00	2019-12-17 09:00:01	0	26.27	9.21	0	0	0	294.3	-1.94	2.82	21.15	3.42286	145.474	11.4	21.2	2.8	179.8	25	24							0									4.7961	790.172			0.0025	5.1984			0.38796	0.494018
2019-12-17_00:00:00	2019-12-17 10:00:01	0	24.57	8.64	0	0	0	294.72	-2.23	3.05	21.57	3.77828	143.828	4.2	21.6	2.9	166.9	24.7	29							0									19.7136	1287.37			0.0009	2.1316			0.771376	1.34161
2019-12-17_01:00:00	2019-12-17 11:00:01	0	21.91	7.78	0	0	0	295.12	-2.67	3.28	21.97	4.22934	140.853	1.7	21.9	3.1	159.5	25.8	25							0									36.9664	1539.78			0.0049	0.5776			1.2754	3.2737
2019-12-17_02:00:00	2019-12-17 12:00:01	0	19.83	7.09	0	0	0	295.4	-3.2	3.07	22.25	4.43451	133.812	9.4	22	4	151.3	23.7	40							0									5.3361	1038.77			0.0625	0.1444			0.188801	8.49438
2019-12-17_03:00:00	2019-12-17 13:00:01	0	19.09	6.87	0	0	0	295.49	-3.92	2.57	22.34	4.68736	123.249	14.5	21.8	3.7	151	22.4	75							0									58.2169	748.022			0.2916	0.2916			0.974871	8.22173
2019-12-17_04:00:00	2019-12-17 14:00:01	0	19.4	7.02	0	0	0	295.46	-4.39	2.1	22.31	4.86643	115.564		22.1	3.9	150		350							0									49.2804	1738.89			0.0441	0.0484			0.933979	10.5393
2019-12-17_05:00:00	2019-12-17 15:00:01	0	19.15	7	0	0	0	295.41	-4.52	1.74	22.26	4.84335	111.054	9.4	22.3	4	119.8		298							0									5.76	1044.58			0.0016	0.0049			0.711232	11.0446
2019-12-17_06:00:00	2019-12-17 16:00:01	0	18.76	6.91	0	0	0	295.27	-4.51	1.36	22.12	4.71059	106.781	10.2	22	4.5	117.5		281							0									10.8241	999.192			0.0144	0.2601			0.04435	13.6205
2019-12-17_07:00:00	2019-12-17 17:00:01	0	18.9	6.98	0	0	0	294.96	-4.38	0.9	21.81	4.47151	101.611	2.8	21.7	4.5	116.6		205							0									17.4724	1516.32			0.0121	1.2544			0.000811691	11.9129
2019-12-17_08:00:00	2019-12-17 18:00:01	0	20.25	7.47	0	0	0	294.35	-4.01	0.22	21.2	4.01603	93.1401	1.2	21.4	3.7	119.1		131							0									39.3129	1604			0.04	4.1209			0.0998752	4.82255
2019-12-17_09:00:00	2019-12-17 19:00:01	0	21	7.8	0	0	0	293.1	-2.99	-0.33	19.95	3.00816	83.702	1.4	20.7	3.2	107.9		71							0									40.96	1561.83			0.5625	15.8404			0.0368043	0.473558
2019-12-17_10:00:00	2019-12-17 20:00:01	0	20.07	7.56	0	0	0	292.14	-2.47	-0.74	18.99	2.57847	73.3222	5.3	20.3	2.6	94.4		112							0									5.1076	1285.94			1.7161	28.5156			0.000463604	0.116644
2019-12-17_11:00:00	2019-12-17 21:00:01	0	19.06	7.23	0	0	0	291.28	-2.25	-1.01	18.13	2.46629	65.8253		20.1	2.3	84.9		83							0									52.2729	1721.42			3.8809	40.96			0.0276533	0.568075
2019-12-17_12:00:00	2019-12-17 22:00:01	0	18.63	7.05	0	0	0	290.33	-1.95	-1.44	17.18	2.42407	53.5557	5.5	20	2	73.7		52							0									2.4025	1308.27			7.9524	55.5025			0.179833	1.20107
2019-12-17_13:00:00	2019-12-17 23:00:01	0	18.99	7.16	0	0	0	289.2	-1.12	-2.03	16.05	2.31847	28.8867	3.6	19.8	1.6	56.4		67							0									12.6736	1440.96			14.0625	77.0884			0.516198	2.5649
2019-12-17_14:00:00	2019-12-18 00:00:01	0	19.56	7.36	0	0	0	287.94	-0.46	-2.04	14.79	2.09122	12.7072	5.6	19.5	1	54.1		92							0									3.0976	1278.78			22.1841	106.916			1.19076	5.89897
2019-12-17_15:00:00	2019-12-18 01:00:01	0	19.64	7.4	0	0	0	287.08	-0.24	-1.76	13.93	1.77629	7.76525	4.3	19.3	1.3	57.4		102							0									9.61	1370.48			28.8369	129.96			0.226851	5.97173
2019-12-17_16:00:00	2019-12-18 02:00:01	0	19.79	7.48	0	0	0	286.01	0.42	-1.84	12.86	1.88733	347.142	7.1	19	0.9	48.5		125							0									0.1444	1165.54			37.6996	163.073			0.974813	7.46751
2019-12-17_17:00:00	2019-12-18 03:00:01	0	20.13	7.73	0.01	0	0	285.05	0.74	-1.84	11.9	1.98323	338.091	3.3	17.5	0.8	332.2		93							0.00773994									19.6249	1420.54			31.36	231.953			1.40003	7.48991
2019-12-17_18:00:00	2019-12-18 04:00:01	0	20.69	8.19	0.02	0	0	284.42	1.05	-1.63	11.27	1.93892	327.212	11.5	16.1	0.3	291		67							0.0154799									10.9561	842.741			23.3289	297.908			2.68605	10.7655
2019-12-17_19:00:00	2019-12-18 05:00:02	0	21.34	8.75	0.05	0	0	284.17	0.99	-1.63	11.02	1.90709	328.727	2	15.1	0.3	269		92							0.0386997									45.5625	1441.72			16.6464	342.62			2.58274	10.9754
2019-12-17_20:00:00	2019-12-18 06:00:02	0	21.59	9.02	0.06	0	0	287.86	0.49	-0.58	14.71	0.759276	319.808		15.8	0.2	269.4		70							0.0464396									81.3604	1576.09			1.1881	199.374			0.31279	20.8002
2019-12-17_21:00:00	2019-12-18 07:00:02	0	21.02	8.63	0.05	0	0	293.07	-0.27	-1.05	19.92	1.08416	14.4209	1.5	19.1	0.9	1.4		68							0.0386997									50.8369	1489.19			0.6724	31.4721			0.0339144	12.5022
2019-12-17_22:00:00	2019-12-18 08:00:02	0	17.88	7.37	0.02	0	0	295.1	-1.84	-1.14	21.95	2.16453	58.2192	4.6	20.4	1.7	47.4		85							0.0154799									7.6729	1350.56			2.4025	5.1984			0.21579	2.74057
2019-12-17_23:00:00	2019-12-18 09:00:02	0	16.9	6.98	0.02	0	0	296.45	-2.78	-0.62	23.3	2.8483	77.4277	12.9	21.5	1.9	60.6		171							0.0154799									35.0464	831.746			3.24	3.24			0.899269	0.899269
2019-12-18_00:00:00	2019-12-18 10:00:02	0	16.17	6.67	0.01	0	0	297.43	-3.7	-0.22	24.28	3.70653	86.5974	13.6	22.6	2.6	82.8		143							0.00773994									48.0249	809.402			2.8224	5.0625			1.22442	1.22442
2019-12-18_01:00:00	2019-12-18 11:00:02	0	16.15	6.69	0.01	0	0	298.06	-4.56	-0.36	24.91	4.57419	85.4862	10.4	22.8	4	108.7		156							0.00773994									13.7641	1000.46			4.4521	9.4864			0.329692	9.32807
2019-12-18_02:00:00	2019-12-18 12:00:02	0	16.11	6.74	0.01	0	0	298.57	-5.47	-0.68	25.42	5.5121	82.9138	2.5	23	4.7	98.3		151							0.00773994									17.9776	1558.67			5.8564	14.3641			0.659514	22.0158
2019-12-18_03:00:00	2019-12-18 13:00:02	0	15.45	6.51	0.01	0	0	298.87	-6.09	-1.05	25.72	6.17985	80.2177	4.5	23.8	4.2	81.7	27.4	381							0.00773994									4.0401	1422.04			3.6864	23.9121			3.91982	23.6182
2019-12-18_04:00:00	2019-12-18 14:00:02	0	15.18	6.35	0.01	0	0	298.92	-6.72	-1.32	25.77	6.84842	78.8871	6.7	23.5	5.7	91.7	28.7	933							0.00773994									0.1225	1272.35			5.1529	21.5296			1.31886	49.3986
2019-12-18_05:00:00	2019-12-18 15:00:02	0	14.66	6.09	0	0	0	298.97	-6.88	-2	25.82	7.1648	73.7911	6	23.3	5.8	93.3	28.1	1690							0									0.0081	1341.76			6.3504	20.1601			1.86269	55.4251
2019-12-18_06:00:00	2019-12-18 16:00:02	0	13.91	5.76	0	0	0	298.96	-6.58	-2.73	25.81	7.12385	67.4669	6.1	23	4.6	82.9	26.2	1383							0									0.1156	1358.66			7.8961	17.4724			6.36984	38.4878
2019-12-18_07:00:00	2019-12-18 17:00:02	0	13.62	5.59	0	0	0	298.77	-5.87	-3.35	25.62	6.75865	60.2868	8	23.1	3.8	76.8	30.8	313							0									5.8081	1234.12			6.3504	16.7281			8.75363	25.388
2019-12-18_08:00:00	2019-12-18 18:00:02	0	13.65	5.52	0	0	0	297.98	-4.84	-3.82	24.83	6.16587	51.7176	7	23	3.7	63	39.3	437							0									2.1904	1310.44			3.3489	10.24			6.08053	18.8866
2019-12-18_09:00:00	2019-12-18 19:00:02	0	13.24	5.27	0	0	0	296.1	-3.67	-3.64	22.95	5.16899	45.2353	10.2	22.8	3.5	58	40.4	312							0									24.3049	1105.56			0.0225	1.2544			2.78554	9.91616
2019-12-18_10:00:00	2019-12-18 20:00:02	0	14.41	5.63	0	0	0	294.88	-3.74	-4.18	21.73	5.60892	41.8203	5.7	22.4	2.5	51.3	34.2	171							0									0.0049	1398.01			0.4489	0.4489			9.66539	9.66539
2019-12-18_11:00:00	2019-12-18 21:00:02	0	16.49	6.55	0.01	0	0	294.24	-3.48	-4.66	21.09	5.81601	36.7518	11.1	22.1	2.2	47.2	32.8	161							0.00773994									20.7025	965.345			1.0201	2.0736			13.0755	13.0755
2019-12-18_12:00:00	2019-12-18 22:00:02	0	17.16	6.99	0.02	0	0	293.63	-2.75	-4.05	20.48	4.89541	34.1771	8.2	21.5	1.5	45.7	38.6	250							0.0154799									1.4641	1124.26			1.0404	7.0225			11.5288	11.5288
2019-12-18_13:00:00	2019-12-18 23:00:02	0	17.38	7.56	0.06	0	0	292.65	-2.08	-2.86	19.5	3.53638	36.0275	11.6	20.8	0.8	34.2	47.3	178							0.0464396									16.3216	873.794			1.69	18.7489			7.48779	7.48779
2019-12-18_14:00:00	2019-12-19 00:00:02	0	23.53	13.98	0.43	0	0	292.01	-2.51	-2.26	18.86	3.37753	48.0003	9.4	20.6	1.1	360	42	150							0.332817									20.9764	642.116			3.0276	26.7289			5.18714	5.18714
2019-12-18_15:00:00	2019-12-19 01:00:02	0	34.78	25.16	1.04	0	0	291.86	-2.9	-2.57	18.71	3.87491	48.4525	10.2	20.4	1.2	356.2	28.6	216							0.804954									223.802	223.802			2.8561	30.4704			7.15512	7.15512
2019-12-18_16:00:00	2019-12-19 02:00:02	0.01	42.9	33.4	1.49	0	0	291.14	-2.45	-2.76	17.99	3.69054	41.595	7.8	20	0.7	55.2	29.1	295							1.15325									655.36	655.36			4.0401	44.0896			8.94334	8.94334
2019-12-18_17:00:00	2019-12-19 03:00:02	0.02	50.25	40.73	1.87	0	0	290.14	-1.47	-2.99	16.99	3.33182	26.1806	9.6	19.5	1	342.1	37	332							1.44737									969.077	969.077			6.3001	66.2596			5.43737	5.43737
2019-12-18_18:00:00	2019-12-19 04:00:02	0.05	58.63	47.83	2.23	0.01	0.01	288.74	-0.45	-2.84	15.59	2.87543	9.00379	14	18.4	1.4	318.3	31.3	357							1.72601									1144.47	1144.47			7.8961	113.21			2.17689	2.17689
2019-12-18_19:00:00	2019-12-19 05:00:02	0.06	64.66	53.12	2.49	0.01	0.01	288.2	-0.52	-2.77	15.05	2.81839	10.6322	15.6	17.9	1.8	336.5	30.3	184							1.92724									1407.75	1407.75			8.1225	136.422			1.03711	1.03711
2019-12-18_20:00:00	2019-12-19 06:00:02	0.08	72.36	59.86	2.81	0.01	0.02	290.49	-0.03	-2.04	17.34	2.04022	0.842601	10.5	17.9	2.4	334.1	32.2	489							2.17492									2436.41	2436.41			0.3136	88.1721			0.129441	1.16592
2019-12-18_21:00:00	2019-12-19 07:00:02	0.09	70.76	58.1	2.71	0.01	0.02	295.9	0.41	-2.59	22.75	2.62225	351.005	11.4	19.5	3.5	335.7	43.4	1013							2.09752									2180.89	2180.89			10.5625	10.5625			0.770443	0.770443
2019-12-18_22:00:00	2019-12-19 08:00:02	0.06	66.35	54.47	2.51	0.01	0.01	301.26	2.17	-3.19	28.11	3.85811	325.775	14.5	22.5	4.1	326.7	127.6	331							1.94272									1597.6	1597.6			31.4721	35.7604			0.0585116	5.94437
2019-12-18_23:00:00	2019-12-19 09:00:02	0.01	55.33	45.21	2.02	0.01	0.01	305.18	3.69	-3.21	32.03	4.89083	311.021	21.3	26.7	4.6	321.7	120.5	319							1.56347									571.688	571.688			28.4089	198.81			0.084581	15.7675
2019-12-19_00:00:00	2019-12-19 10:00:02	0.01	42.47	34.03	1.47	0	0.01	307.91	3.64	-2.91	34.76	4.66023	308.641	43.3	31.7	5.3	317.9	123	972							1.13777									85.9329	818.532			9.3636	476.549			0.409312	19.7156
2019-12-19_01:00:00	2019-12-19 11:00:02	0.02	31.94	25.17	1.06	0	0.01	310.12	3.47	-2.2	36.97	4.10864	302.375	67.2	35.9	4.3	318.8	151.3	498							0.820433									1766.52	1905.32			1.1449	797.498			0.0366197	8.34423
2019-12-19_02:00:00	2019-12-19 12:00:02	0.03	25.09	20.27	0.85	0	0	311.75	2.8	-1.14	38.6	3.02318	292.153	92.4	38.6	4.1	322.7	161.8	528							0.657895									5202.74	5202.74			4.54384e-28	1060.8			1.15955	2.57018
2019-12-19_03:00:00	2019-12-19 13:00:02	0.02	22.61	18.55	0.78	0	0	312.03	0.8	-0.16	38.88	0.815843	281.31	100	39.8	3.7	323.2	148.3	1262							0.603715									6634.1	6634.1			0.8464	1159.4			8.31836	8.31836
2019-12-19_04:00:00	2019-12-19 14:00:02	0.04	26.46	21.77	0.96	0	0	312.23	-2.3	-0.47	39.08	2.34753	78.4509	97.7	39.9	3.6	321.8	145	2095							0.743034									5765.36	5765.36			0.6724	1179.92			1.56868	1.56868
2019-12-19_05:00:00	2019-12-19 15:00:02	0.05	28.63	23.66	1.06	0	0	312.42	-3.26	-0.94	39.27	3.39282	73.9156	93.8	40	3.4	320.6	123.4	2876							0.820433									4919.62	4919.62			0.5329	1199.93			5.16107e-05	1.62006
2019-12-19_06:00:00	2019-12-19 16:00:02	0.06	29.57	24.33	1.09	0	0	311.96	-3.84	-1.43	38.81	4.09762	69.575	87.5	34.5	1.3	33.2	132.7	1993							0.843653									3990.45	3990.45			18.5761	822.542			7.82668	7.82668
2019-12-19_07:00:00	2019-12-19 17:00:02	0.09	29.44	22.43	0.91	0	0	309.68	-4.45	-1.9	36.53	4.83865	66.8793	78.6	30.6	0.7	134.3	113.6	2758							0.704334									3155.07	3155.07			35.1649	506.25			17.1284	17.1284
2019-12-19_08:00:00	2019-12-19 18:00:02	0.12	27.44	19.63	0.71	0	0	308.11	-3.55	-3.72	34.96	5.14207	43.6606	57.4	25.9	3.5	191	113.5	3518							0.549536									1426.57	1426.57			82.0836	263.413			2.6964	9.74733
2019-12-19_09:00:00	2019-12-19 19:00:02	0.15	26.13	17.75	0.6	0	0	305.44	-2.26	-4.55	32.29	5.08036	26.4138	56.7	24.4	5	194.6	90.3	2942							0.464396									1517.1	1517.1			62.2521	145.444			0.0064584	20.7969
2019-12-19_10:00:00	2019-12-19 20:00:02	0.17	23.51	16.01	0.56	0	0	304.21	-1.01	-4.31	31.06	4.42676	13.1887	41.3	23.1	4.2	193.6	42.5	3397							0.433437									639.584	639.584			63.3616	90.8209			0.0514199	9.65195
2019-12-19_11:00:00	2019-12-19 21:00:02	0.19	58.11	49.1	2.51	0.01	0.01	302.8	0.78	-3.47	29.65	3.55659	347.331	22.2	22.1	3.8	192.7	37.7	3328							1.94272									723.61	723.61			57.0025	57.0025			0.0592506	3.37305
2019-12-19_12:00:00	2019-12-19 22:00:02	0.05	69.75	42.54	1.27	0.01	0.02	296.69	4.39	5.42	23.54	6.97485	219.006	16.6	21.4	3.3	194.5	34.5	3111							0.982972									672.884	672.884			4.5796	4.5796			13.5045	22.6086
2019-12-19_13:00:00	2019-12-19 23:00:02	0.04	75.37	42.72	1.1	0	0.01	295.69	4.15	7.13	22.54	8.24981	210.201	12.7	21.3	4	189.1	33.7	3147							0.851393									901.2	901.2			1.5376	1.5376			18.0609	45.2904
2019-12-19_14:00:00	2019-12-20 00:00:02	0.04	72.21	37.25	0.74	0	0.01	294.75	3.72	6.56	21.6	7.54135	209.556	9.7	20.7	3.8	190	34.6	2948							0.572755									759.003	759.003			0.81	5.4289			13.9977	33.8881
2019-12-19_15:00:00	2019-12-20 01:00:02	0.13	67.16	30.36	0.37	0	0.01	294.15	3.15	5.62	21	6.44258	209.271	10.3	20.5	3.4	192.6	37.3	3234							0.286378									402.404	402.404			0.25	9.7969			9.25732	18.6847
2019-12-19_16:00:00	2019-12-20 02:00:02	0.19	67.35	31.38	0.48	0	0.01	293.73	2.67	4.86	20.58	5.54513	208.784	14.2	20.5	2.5	200	41.3	2517							0.371517									295.152	295.152			0.0064	12.6025			9.27283	9.27283
2019-12-19_17:00:00	2019-12-20 03:00:02	0.19	71.28	36.42	0.8	0	0.01	293.29	2.63	4.05	20.14	4.82902	212.999	13.4	20.4	2.2	202.4	41	1864							0.619195									529.92	529.92			0.0676	16.7281			6.91173	6.91173
2019-12-19_18:00:00	2019-12-20 04:00:02	0.18	71.14	37.97	0.92	0.01	0.02	292.8	2.5	3.15	19.65	4.0215	218.437	13.5	20.3	1.9	207	43.3	1858							0.712074									598.781	598.781			0.4225	21.9024			4.50078	4.50078
2019-12-19_19:00:00	2019-12-20 05:00:02	0.17	70.2	39.41	1.08	0.01	0.02	292.17	2.55	2.43	19.02	3.52241	226.38	18.7	20.1	1.6	211.7	40.3	489							0.835913									428.904	428.904			1.1664	30.3601			3.69568	3.69568
2019-12-19_20:00:00	2019-12-20 06:00:02	0.17	67.35	38.62	1.07	0.01	0.02	293.65	2.44	2.91	20.5	3.79759	219.979	16.7	20.3	1.5	206.4	38.1	276							0.828173									480.486	480.486			0.04	14.6689			5.27893	5.27893
2019-12-19_21:00:00	2019-12-20 07:00:02	0.14	58.68	33.34	0.81	0	0.01	294.93	2.18	3.01	21.78	3.71652	215.914	13	20.8	1.7	203.9	48.3	209							0.626935									413.716	413.716			0.9604	4.2025			4.06634	4.06634
2019-12-19_22:00:00	2019-12-20 08:00:02	0.14	50.64	28.62	0.6	0	0.01	295.98	1.74	3.42	22.83	3.83719	206.966	6.9	22	1.9	199.2	45.6	211							0.464396									471.758	471.758			0.6889	0.6889			3.75269	3.75269
2019-12-19_23:00:00	2019-12-20 09:00:02	0.13	44.38	24.87	0.45	0	0.01	296.81	0.84	3.55	23.66	3.64803	193.312	13.7	23.3	2.8	181.6	36.3	188							0.348297									124.769	124.769			0.1296	5.4289			0.71915	0.861234
2019-12-20_00:00:00	2019-12-20 10:00:02	0.14	39.64	22.2	0.35	0	0	297.67	-0.35	3.83	24.52	3.84596	174.779	13.5	23.4	2.8	178.2	37.9	164							0.270898									75.69	169.52			1.2544	10.8241			1.09403	1.26778
2019-12-20_01:00:00	2019-12-20 11:00:02	0.14	37.43	20.95	0.29	0	0	298.01	-1.19	3.97	24.86	4.14451	163.314	6.2	23.5	2.7	172.5	35.4	153							0.224458									217.562	465.265			1.8496	13.9129			2.08662	2.08662
2019-12-20_02:00:00	2019-12-20 12:00:02	0.13	37.97	21.47	0.3	0	0	298.33	-2.38	3.73	25.18	4.42462	147.459	15	23.9	2.6	175.7	45.8	159							0.232198									41.8609	150.062			1.6384	19.8025			3.32925	3.32925
2019-12-20_03:00:00	2019-12-20 13:00:02	0.13	39.64	22.36	0.28	0	0	298.19	-3.66	3.2	25.04	4.86165	131.164	7.6	23.7	3.1	153.5	33.2	212							0.216718									217.858	351.938			1.7956	16.8921			3.1034	5.96163
2019-12-20_04:00:00	2019-12-20 14:00:02	0.12	41.65	23.91	0.31	0	0	298.03	-4.7	2.27	24.88	5.21947	115.779	2.4	23.9	2.9	127.7	32.3	270							0.239938									462.68	502.208			0.9604	17.2225			5.37996	6.75726
2019-12-20_05:00:00	2019-12-20 15:00:02	0.12	40.63	23.76	0.33	0	0	297.89	-5.1	1.22	24.74	5.24389	103.453	12.8	23.7	4	97.7	38.2	353							0.255418									120.122	147.866			1.0816	14.5161			1.54727	13.8674
2019-12-20_06:00:00	2019-12-20 16:00:02	0.12	37.96	22.14	0.3	0	0	297.62	-5.45	0.48	24.47	5.4711	95.0331	13.6	23.4	3.9	104.6	36.5	461							0.232198									72.9316	168.48			1.1449	10.4976			2.46835	14.8309
2019-12-20_07:00:00	2019-12-20 17:00:02	0.11	37.64	21.62	0.27	0	0	297.06	-5.44	-0.43	23.91	5.45697	85.4807	13.4	22.7	4.7	108.6	37.3	355							0.208978									67.5684	187.69			1.4641	3.9204			0.573001	21.5015
2019-12-20_08:00:00	2019-12-20 18:00:02	0.11	41.03	23.95	0.31	0	0	296.41	-4.71	-1.93	23.26	5.09009	67.718	12.5	22.3	4.1	109.6	38.1	231							0.239938									131.102	150.553			0.9216	0.9216			0.980275	13.4695
2019-12-20_09:00:00	2019-12-20 19:00:02	0.11	43.92	26.66	0.39	0	0	295.54	-3.39	-2.17	22.39	4.02505	57.3761	8	21.8	3.4	109.1	39.6	213							0.301858									348.196	348.196			0.3481	0.3481			0.390683	3.6292
2019-12-20_10:00:00	2019-12-20 20:00:02	0.1	50.37	32	0.56	0	0	294.76	-2.65	-1.75	21.61	3.17569	56.5603	8.2	21.6	2.8	101.6	40.5	191							0.433437									566.44	566.44			0.0001	2.0164			0.141142	0.207652
2019-12-20_11:00:00	2019-12-20 21:00:02	0.09	57.47	37.51	0.73	0	0	294.18	-3.07	-0.92	21.03	3.20489	73.318	11.1	21.6	2.6	95.1	37.2	215							0.565015									697.488	697.488			0.3249	4			0.365888	0.365888
2019-12-20_12:00:00	2019-12-20 22:00:02	0.09	59.64	39.11	0.78	0	0	294.02	-3.67	0.04	20.87	3.67022	90.6243	17.8	21.5	2.1	88.9	38.9	160							0.603715									454.116	454.116			0.3969	5.1076			2.46558	2.46558
2019-12-20_13:00:00	2019-12-20 23:00:02	0.08	60.53	39.25	0.78	0	0	293.97	-3.86	-1.41	20.82	4.10946	69.9336	13.2	21.4	1.4	81.2	47.3	209							0.603715									678.603	678.603			0.3364	5.8081			7.3412	7.3412
2019-12-20_14:00:00	2019-12-21 00:00:02	0.08	59.89	38.17	0.74	0	0	293.82	-2.65	-1.11	20.67	2.87308	67.2729	19.1	21.1	1.3	88.2	44.4	235							0.572755									363.665	363.665			0.1849	8.1796			2.47459	2.47459
2019-12-20_15:00:00	2019-12-21 01:00:02	0.09	55	34.61	0.66	0	0	294.42	-3.37	-2.42	21.27	4.14889	54.318	14.9	21.1	1.2	76.6	45.3	255							0.510836									388.484	388.484			0.0289	5.1076			8.69596	8.69596
2019-12-20_16:00:00	2019-12-21 02:00:02	0.1	51.08	31.68	0.58	0	0	293.64	-2.54	-2.51	20.49	3.57095	45.3405	17.6	21	0.9	81.6	43.5	201							0.448916									198.246	198.246			0.2601	9.8596			7.13399	7.13399
2019-12-20_17:00:00	2019-12-21 03:00:02	0.11	48.72	29.9	0.54	0	0	293.67	-2.48	-1.14	20.52	2.72947	65.313	17.9	20.9	1	75.8	46.6	162							0.417957									144	144			0.1444	10.3041			2.99106	3.206
2019-12-20_18:00:00	2019-12-21 04:00:02	0.12	47.18	28.73	0.51	0	0	293.25	-3.15	-0.81	20.1	3.25248	75.5794	17.8	20.9	1.3	60	47.1	188							0.394737									119.465	119.465			0.64	13.1769			3.81216	3.81216
2019-12-20_19:00:00	2019-12-21 05:00:02	0.12	46.21	28.33	0.51	0	0	293.5	-3.25	-1.86	20.35	3.74461	60.2173	20.2	20.8	1.2	29.2	53.2	262							0.394737									66.0969	66.0969			0.2025	12.1104			6.47504	6.47504
2019-12-20_20:00:00	2019-12-21 06:00:02	0.12	46.8	29.6	0.59	0	0	294.36	-1.8	-3.62	21.21	4.04282	26.4384	16	20.6	1.9	354.5	48.3	369							0.456656									184.96	184.96			0.3721	7.9524			4.59168	4.59168
2019-12-20_21:00:00	2019-12-21 07:00:02	0.14	51.95	35.46	0.9	0	0	296.27	-0.29	-2.7	23.12	2.71553	6.13057	22.1	19.7	2.9	327.5	35.7	478							0.696594									178.49	178.49			11.6964	11.6964			0.0340294	0.0340294
2019-12-20_22:00:00	2019-12-21 08:00:02	0.21	61.25	45.05	1.42	0	0.01	298.97	1.19	-1.4	25.82	1.83742	319.636	21.9	20.5	2.8	326	40.3	586							1.09907									535.922	535.922			28.3024	28.3024			0.926567	0.926567
2019-12-20_23:00:00	2019-12-21 09:00:02	0.3	64.03	48.05	1.64	0.01	0.01	301.39	2.16	-0.51	28.24	2.21939	283.285	22.2	23.1	2.7	326.9	52.4	556							1.26935									668.222	668.222			26.4196	45.0241			0.230984	0.36073
2019-12-21_00:00:00	2019-12-21 10:00:02	0.47	61.25	45.58	1.63	0.01	0.01	305.7	2.83	-2.53	32.55	3.79602	311.797	33.5	25.8	3.4	337.4	72.5	637							1.26161									145.926	921.73			45.5625	188.238			0.156835	2.80906
2019-12-21_01:00:00	2019-12-21 11:00:02	1.38	60.71	40.59	1.45	0.01	0.01	310.23	0.9	-1.64	37.08	1.87072	331.243	44.1	29	3.3	358.4	80	582							1.12229									12.3201	1293.84			65.2864	460.103			2.04284	2.04284
2019-12-21_02:00:00	2019-12-21 12:00:02	2.56	60.92	35.66	1.17	0.01	0.01	310.39	-1.21	-0.97	37.24	1.55081	51.2826	45.6	28.6	3.2	47.4	72.3	669							0.905573									98.8036	1058.85			74.6496	449.864			2.71984	2.71984
2019-12-21_03:00:00	2019-12-21 13:00:02	2.18	60.93	36.46	1.14	0	0.01	309.28	-3.4	1.27	36.13	3.62945	110.482	36.3	28.3	4.1	47.5	66.1	695							0.882353									0.0256	577.922			61.3089	392.04			0.221418	4.88166
2019-12-21_04:00:00	2019-12-21 14:00:02	1.83	60.74	36.63	1.1	0	0.01	309.5	-4.44	-0.39	36.35	4.4571	84.9803	40.3	28.9	3.8	45.8	71	739							0.851393									13.4689	795.804			55.5025	425.184			0.431774	7.49169
2019-12-21_05:00:00	2019-12-21 15:00:02	0.95	58.54	36.76	1.05	0	0.01	306.66	-5.04	0.28	33.51	5.04777	93.1797	36.2	30.1	3.5	53.4	69.2	974							0.812693									0.3136	587.578			11.6281	360.24			2.3956	9.1674
2019-12-21_06:00:00	2019-12-21 16:00:02	0.86	58.31	36.27	0.99	0	0.01	304.68	-4.88	-0.41	31.53	4.89719	85.1976	36.7	30.1	2.9	62.5	70.8	1025							0.766254									0.1849	588.063			2.0449	289			3.98878	5.18561
2019-12-21_07:00:00	2019-12-21 17:00:02	0.97	57.55	35.15	0.96	0	0.01	304.77	-2.68	-4.15	31.62	4.94013	32.8538	34.6	27.8	1.2	36.8	64.7	914							0.743034									0.3025	442.261			14.5924	218.744			13.9886	13.9886
2019-12-21_08:00:00	2019-12-21 18:00:02	1.53	60.19	34.55	0.94	0	0.01	304.36	0.24	3.62	31.21	3.62795	183.793	28.1	25.6	1.9	39.7	61	970							0.727554									41.6025	194.045			31.4721	148.352			2.9858	2.9858
2019-12-21_09:00:00	2019-12-21 19:00:02	3.51	68.93	33.13	0.87	0	0.01	302.66	-2.74	0.29	29.51	2.7553	96.0415	17.7	25.8	1	57.8	62.2	1411							0.673375									238.085	238.085			13.7641	114.062			3.08109	3.11415
2019-12-21_10:00:00	2019-12-21 20:00:02	3.9	72.91	33.76	0.85	0	0.01	299.28	-1.7	-0.94	26.13	1.94258	61.0601	27.9	24.9	4.3	197.6	80.6	1404							0.657895									34.3396	167.444			1.5129	40.96			5.55745	5.55745
2019-12-21_11:00:00	2019-12-21 21:00:02	3.52	71.1	34.81	0.95	0	0.01	300.71	-3.53	-2.62	27.56	4.39606	53.417	35.7	23.1	5.8	197.9	85.1	1605							0.735294									0.7921	474.804			19.8916	36.3609			1.97106	21.8655
2019-12-21_12:00:00	2019-12-21 22:00:02	4.85	77.76	36.13	1	0	0.01	299.78	-1.85	-2.64	26.63	3.22368	35.0212	41.6	21.4	4.9	201.2	59.1	1377							0.773994									29.9209	841.58			27.3529	27.3529			2.81006	6.77914
2019-12-21_13:00:00	2019-12-21 23:00:02	3.67	77.79	36.51	0.94	0	0.01	297.97	0.21	6.46	24.82	6.46341	181.862	30.4	21.4	5	200.8	48.6	1153							0.727554									37.3321	330.876			11.6964	11.6964			2.14158	35.3242
2019-12-21_14:00:00	2019-12-22 00:00:02	2.65	80.6	37.22	0.82	0	0.01	298.14	-5.1	3.86	24.99	6.39606	127.121	20.9	21.6	4.2	197.1	47.6	1084							0.634675									266.342	266.342			11.4921	11.4921			4.82269	25.7664
2019-12-21_15:00:00	2019-12-22 01:00:02	2.34	85.49	39.39	0.78	0	0	297.5	-6.13	2.59	24.35	6.6547	112.905	20.8	21.2	4.5	190.6	42.8	1011							0.603715									345.588	345.588			9.9225	9.9225			4.64272	31.7498
2019-12-21_16:00:00	2019-12-22 02:00:02	3.35	103.03	44.76	0.79	0	0	296.62	-1.54	4.71	23.47	4.95537	161.894	10.7	20.9	3.9	192.5	45.5	718							0.611455									1160.08	1160.08			6.6049	6.6049			1.11381	11.1247
2019-12-21_17:00:00	2019-12-22 03:00:02	4.96	102.92	42.64	0.76	0	0	296.64	-2.86	-0.49	23.49	2.90167	80.2781	13.4	20.7	3.8	193.8	40.7	823							0.588235									854.978	854.978			7.7841	7.7841			0.806993	1.39635
2019-12-21_18:00:00	2019-12-22 04:00:02	6.38	108.51	42.56	0.76	0	0	295.13	-0.7	-2.25	21.98	2.35637	17.2816	20.1	20.4	4	191.3	43.5	912							0.588235									504.452	504.452			2.4964	5.0625			2.70151	2.70151
2019-12-21_19:00:00	2019-12-22 05:00:02	0	38.52	31.6	1.55	0.01	0.02	291.09	1.38	1.67	17.94	2.1664	219.568	34.6	20.2	3.9	191.3	42.9	1006							1.19969									9	305.55			5.1076	42.1201			3.00536	3.00536
2019-12-21_20:00:00	2019-12-22 06:00:02	0	28.69	20.87	0.91	0	0.01	295.13	1.53	2.85	21.98	3.23472	208.229	29	20	3.5	191.3	43.9	996							0.704334									66.0969	66.0969			3.9204	7.0225			0.0703746	1.47554
2019-12-21_21:00:00	2019-12-22 07:00:02	0	28.25	17.97	0.66	0	0	296.69	1.73	4.42	23.54	4.7465	201.375	15.9	20	3.3	187.9	48	613							0.510836									4.2849	220.522			12.5316	12.5316			2.09237	6.38322
2019-12-21_22:00:00	2019-12-22 08:00:02	0	30.12	17.98	0.61	0	0	297.54	2.13	4.54	24.39	5.01483	205.134	10.4	20.1	3.4	188.9	48	218							0.472136									57.4564	413.716			18.4041	18.4041			2.60767	8.38003
2019-12-21_23:00:00	2019-12-22 09:00:02	0	26.43	13.89	0.37	0	0	298.14	2.06	4.83	24.99	5.25095	203.098	22.7	20.7	3.9	183.5	49.5	104							0.286378									77.6161	147.137			18.4041	18.4041			1.82507	13.1838
2019-12-22_00:00:00	2019-12-22 10:00:02	0	27.34	11.46	0.17	0	0	297.97	1.97	5.38	24.82	5.72934	200.111	15.8	21.2	3.8	184.9	50.5	41							0.131579									18.8356	460.532			13.1044	13.1044			3.72234	16.0748
2019-12-22_01:00:00	2019-12-22 11:00:02	0	28.7	10.3	0.05	0	0	297.94	1.93	6.02	24.79	6.32181	197.776	16.7	21.5	3.6	181.2	51.7	79							0.0386997									40.96	471.758			10.8241	10.8241			7.40826	19.3759
2019-12-22_02:00:00	2019-12-22 12:00:02	0	29.96	10.61	0.04	0	0	298.01	1.85	6.68	24.86	6.93144	195.48	14.1	21.6	3.3	180.2	53.9	34							0.0309598									12.1801	576.48			10.6276	10.6276			13.1874	22.1977
2019-12-22_03:00:00	2019-12-22 13:00:02	0	31.93	10.78	0.01	0	0	297.81	0.95	6.81	24.66	6.87594	187.941	12.6	21.1	3.7	182.9	51.6	42							0.00773994									3.3124	642.116			12.6736	12.6736			10.0866	25.5626
2019-12-22_04:00:00	2019-12-22 14:00:02	0	31.64	10.73	0.02	0	0	297.4	-0.62	6.39	24.25	6.42001	174.458	21.5	21.4	3.6	186.3	46.4	45							0.0154799									115.993	271.92			8.1225	8.1225			7.95244	20.2501
2019-12-22_05:00:00	2019-12-22 15:00:02	0	29.6	10.25	0.02	0	0	297.34	-2.19	5.88	24.19	6.27459	159.572	19.6	22	3.7	186.7	43.3	43							0.0154799									87.4225	356.077			4.7961	4.7961			6.62852	19.8434
2019-12-22_06:00:00	2019-12-22 16:00:02	0	28.13	9.81	0.02	0	0	296.85	-2.05	5.91	23.7	6.25545	160.87	16.8	21.6	3.8	193.4	40.8	62							0.0154799									48.8601	488.852			4.41	4.41			6.02921	20.5703
2019-12-22_07:00:00	2019-12-22 17:00:02	0	25.72	9.11	0.02	0	0	296.13	-2.86	5.75	22.98	6.422	153.555	9.9	21.3	3.3	184.4	38.4	90							0.0154799									0.6241	882.684			2.8224	2.8224			9.74689	17.6568
2019-12-22_08:00:00	2019-12-22 18:00:02	0	24.86	8.8	0.02	0	0	295.84	-2.54	4.76	22.69	5.39529	151.915	18.1	20.6	3.3	180.4	43.7	129							0.0154799									86.49	476.112			4.3681	4.3681			4.39026	10.0825
2019-12-22_09:00:00	2019-12-22 19:00:02	0	24.41	8.63	0.02	0	0	295.34	-1.92	4.02	22.19	4.45497	154.47	9	19.6	3.2	165	46.5	190							0.0154799									0.1369	966.588			6.7081	8.0656			1.57496	4.55812
2019-12-22_10:00:00	2019-12-22 20:00:02	0	24.43	8.66	0.02	0	0	295.23	-1.59	4.2	22.08	4.49089	159.265	9.2	19.6	2.7	156.8	40.6	177							0.0154799									0.2916	952.34			6.1504	8.7025			3.20729	3.20729
2019-12-22_11:00:00	2019-12-22 21:00:02	0	24.36	8.69	0.02	0	0	295.22	-1.65	4.25	22.07	4.55906	158.782	-0.1	20.1	2.5	174.3	38.5	249							0.0154799									77.2641	1610.42			3.8809	6.0516			4.23972	4.23972
2019-12-22_12:00:00	2019-12-22 22:00:02	0	23.77	8.58	0.02	0	0	295.14	-1.43	4.12	21.99	4.36111	160.859	2.2	20	2.2	181.5	42.5	292							0.0154799									40.7044	1439.44			3.9601	6.9696			4.67041	4.67041
2019-12-22_13:00:00	2019-12-22 23:00:02	0	22.19	8.21	0.02	0	0	294.96	-1.03	4.41	21.81	4.52869	166.854	3.7	20.2	2.6	156.7	38.6	216							0.0154799									20.3401	1354.98			2.5921	6.8644			3.71983	3.71983
2019-12-22_14:00:00	2019-12-23 00:00:02	0	21.47	8.11	0.02	0	0	294.8	-1.38	4.87	21.65	5.06175	164.179	14.8	20.4	3.5	136.4	37.2	132							0.0154799									44.7561	666.156			1.5625	6.6564			2.43906	9.25224
2019-12-22_15:00:00	2019-12-23 01:00:02	0	22.57	8.62	0.02	0	0	294.24	-1.32	4.89	21.09	5.06503	164.894	11.1	20.4	3.5	131.4	39.1	180							0.0154799									6.1504	841			0.4761	9.8596			2.44931	9.27219
2019-12-22_16:00:00	2019-12-23 02:00:02	0	23.18	8.94	0.02	0	0	293.98	-0.98	4.12	20.83	4.23495	166.62	9	20.4	3.8	140.7	38.1	157							0.0154799									0.0036	947.408			0.1849	11.56			0.189181	6.32497
2019-12-22_17:00:00	2019-12-23 03:00:02	0	22.75	8.94	0.01	0	0	294.53	-0.91	3.98	21.38	4.08271	167.121	13.4	20.4	3.5	138.6	38.4	128							0.00773994									19.8916	695.904			0.9604	8.1225			0.339548	4.25476
2019-12-22_18:00:00	2019-12-23 04:00:02	0	22.93	9.12	0.01	0	0	294.43	-1.02	3.42	21.28	3.56887	163.393	10.9	20.3	2.7	115.4	33.4	137							0.00773994									3.1684	823.69			0.9604	9.3025			0.754927	0.754927
2019-12-22_19:00:00	2019-12-23 05:00:02	0	23.01	9.29	0.02	0	0	294.3	-1.14	3.23	21.15	3.42527	160.56	10.9	20.2	2.1	119	38.4	130							0.0154799									2.5921	813.961			0.9025	10.7584			1.75635	1.75635
2019-12-22_20:00:00	2019-12-23 06:00:02	0	23.02	9.46	0.02	0	0	294.58	-1.36	3.41	21.43	3.6712	158.256	-0.3	19.5	3.1	127.4	35.9	118							0.0154799									95.2576	1564.99			3.7249	13.69			0.326268	1.5655
2019-12-22_21:00:00	2019-12-23 07:00:02	0	22.88	9.6	0.02	0	0	295.01	-1.38	3.3	21.86	3.57693	157.306	13.9	19.6	2.6	148.5	36.3	140							0.0154799									18.49	636.048			5.1076	10.0489			0.954385	0.954385
2019-12-22_22:00:00	2019-12-23 08:00:02	0	23.35	9.88	0.03	0	0	295.41	-1.28	2.79	22.26	3.06961	155.355	6.5	20.5	2.2	117.1	40.7	74							0.0232198									11.4244	1045.88			3.0976	3.4969			0.75622	0.75622
2019-12-22_23:00:00	2019-12-23 09:00:02	0	23.99	10.17	0.03	0	0	295.86	-1.73	2.75	22.71	3.24891	147.826	10.7	20.5	2.1	106.9	36.9	46							0.0232198									0.2809	775.623			4.8841	4.8841			1.31999	1.31999
2019-12-23_00:00:00	2019-12-23 10:00:02	0	23.85	10.33	0.04	0	0	296.22	-2.04	2.84	23.07	3.49674	144.31	11.3	20.6	2.5	133.2	38.2	55							0.0309598									0.9409	733.868			6.1009	6.1009			0.993493	0.993493
2019-12-23_01:00:00	2019-12-23 11:00:02	0	22.99	10.4	0.07	0	0	296.56	-2.65	2.54	23.41	3.67071	133.786	13.4	20.6	2.4	143.5	40.9	58							0.0541796									9	621.006			7.8961	7.8961			1.6147	1.6147
2019-12-23_02:00:00	2019-12-23 12:00:02	0	21.76	10.41	0.1	0	0	296.95	-3.24	2.08	23.8	3.85019	122.699	12.3	20.3	1.7	173.3	38.4	59							0.0773994									3.5721	676.52			12.25	12.25			4.62334	4.62334
2019-12-23_03:00:00	2019-12-23 13:00:02	0	20.3	10.25	0.13	0	0	297.41	-4.01	1.63	24.26	4.32863	112.121	23.8	20.7	1.8	144.5	37.1	85							0.100619									183.603	215.209			12.6736	12.6736			6.39395	6.39395
2019-12-23_04:00:00	2019-12-23 14:00:02	0	19.85	9.78	0.12	0	0	297.67	-4.78	1.63	24.52	5.05028	108.829	29.1	21.2	2.2	107.6	35.6	133							0.0928793									373.262	373.262			11.0224	11.0224			8.12408	8.12408
2019-12-23_05:00:00	2019-12-23 15:00:02	0	20.76	9.24	0.07	0	0	297.93	-5.2	1.07	24.78	5.30895	101.627	15	21	2.2	122.7	35.7	181							0.0541796									33.1776	599.27			14.2884	14.2884			9.66554	9.66554
2019-12-23_06:00:00	2019-12-23 16:00:02	0	23.61	9.62	0.04	0	0	297.47	-5.01	0.68	24.32	5.05594	97.7293	8.1	20.7	2.2	129.3	33.1	209							0.0309598									2.3104	961			13.1044	13.1044			8.15638	8.15638
2019-12-23_07:00:00	2019-12-23 17:00:02	0	26.46	10.3	0.03	0	0	296.93	-4.9	0.6	23.78	4.9366	96.9809	5.6	20.3	2.1	121.7	31.5	231							0.0232198									22.09	1077.15			12.1104	12.1104			8.04629	8.04629
2019-12-23_08:00:00	2019-12-23 18:00:02	0	28.41	10.89	0.03	0	0	295.96	-4.92	0.24	22.81	4.92585	92.7926	11.7	19.9	1.8	149.4	32	272							0.0232198									0.6561	682.777			8.4681	8.4681			9.77094	9.77094
2019-12-23_09:00:00	2019-12-23 19:00:02	0	29.19	10.95	0.03	0	0	295.69	-4.73	-0.07	22.54	4.73052	89.1523	7.6	19.7	1.8	149.8	25.6	182							0.0232198									11.2225	910.229			8.0656	8.0656			8.58794	8.58794
2019-12-23_10:00:00	2019-12-23 20:00:02	0	26.69	10.11	0.03	0	0	295.82	-4.24	-1.03	22.67	4.36331	76.3461	6.6	20.4	1.6	97.3	19.9	254							0.0232198									12.3201	1024.64			5.1529	5.1529			7.6359	7.6359
2019-12-23_11:00:00	2019-12-23 21:00:02	0	25.67	9.8	0.03	0	0	295.81	-3.8	-1.36	22.66	4.03604	70.3081	5.2	20.9	1.8	90.2	22.8	324							0.0232198									21.16	1137.04			3.0976	3.0976			4.99986	4.99986
2019-12-23_12:00:00	2019-12-23 22:00:02	0	23.94	9.37	0.03	0	0	296.14	-3.35	-1.89	22.99	3.84637	60.5693	6.7	21.1	1.5	69.1	23.5								0.0232198									7.1289	1066.02			3.5721	3.5721			5.50548	5.50548
2019-12-23_13:00:00	2019-12-23 23:00:02	0	26.26	9.85	0.03	0	0	295.14	-1.96	-0.96	21.99	2.18248	63.9047	4.7	21.4	1.5	75.4	28.1	260							0.0232198									26.5225	1167.59			0.3481	1.5376			0.465773	3.3765
2019-12-23_14:00:00	2019-12-24 00:00:02	0	26.96	10.03	0.03	0	0	295.16	-2.48	-1.1	22.01	2.71301	66.0805	5.1	21.4	1.9	74.8	28.7	289							0.0232198									24.3049	1128.29			0.3721	1.4884			0.660978	0.822639
2019-12-23_15:00:00	2019-12-24 01:00:02	0	24.31	9.37	0.04	0	0	295.12	-3.07	-1.27	21.97	3.32232	67.5262	6.7	21.5	2.2	58.1	20.8	298							0.0309598									7.1289	1066.02			0.2209	1.3456			1.2596	1.2596
2019-12-23_16:00:00	2019-12-24 02:00:02	0	22.52	9.26	0.07	0	0	294.04	-2.03	-0.5	20.89	2.09067	76.1633	6.1	21.5	1.7	81.7	23.9	294							0.0541796									9.9856	1112.89			0.3721	5.0176			0.152623	2.99058
2019-12-23_17:00:00	2019-12-24 03:00:02	0	19.58	9.27	0.13	0	0	293.64	-2.2	0.17	20.49	2.20656	94.4185	6.4	21.5	1.7	82.7	16.8	426							0.100619									8.2369	1092.3			1.0201	6.9696			0.256601	2.60319
2019-12-23_18:00:00	2019-12-24 04:00:02	0	17.65	9.41	0.18	0	0	293.85	-2.43	-0.36	20.7	2.45652	81.5732	4.8	21.4	1.6	95.9	21	349							0.139319									21.2521	1190.94			0.49	6.4009			0.73363	2.14177
2019-12-23_19:00:00	2019-12-24 05:00:02	0	27.03	9.07	0	0	0	294.18	-4.11	-0.94	21.03	4.21612	77.1176	-1.7	21.5	3.1	117.1	24.3	304							0									115.993	1709.82			0.2209	4.41			1.24573	3.22606
2019-12-23_20:00:00	2019-12-24 06:00:02	0	26.45	8.95	0	0	0	295.61	-4.67	-0.61	22.46	4.70967	82.5582	-1	21.8	3.6	118.9	26.8	202							0									99.0025	1662.19			0.4356	0.4356			1.23137	7.78226
2019-12-23_21:00:00	2019-12-24 07:00:02	0	21.16	7.23	0	0	0	296.66	-5.24	-0.09	23.51	5.24077	89.0162	7.8	22.1	3.4	119.8	27.5	333							0									0.3249	1135.02			1.9881	1.9881			3.38844	9.73922
2019-12-23_22:00:00	2019-12-24 08:00:02	0	14.31	4.76	0	0	0	297.31	-5	-0.14	24.16	5.00196	88.3963	8.4	22.6	4	112.2	27.3	400							0									13.2496	1264.51			2.4336	4.5369			1.00392	12.124
2019-12-23_23:00:00	2019-12-24 09:00:02	0	9	2.86	0	0	0	298.05	-4.75	-0.3	24.9	4.75946	86.3863	8.7	23.6	4.4	109.5	36.8	126							0									34.1056	1380.87			1.69	14.9769			0.129215	13.2457
2019-12-24_00:00:00	2019-12-24 10:00:02	0	9.65	3.06	0	0	0	297.97	-5.56	0.56	24.82	5.58813	95.7513	12.9	23.8	5.2	119.3	27.7	118							0									96.8256	1073.22			1.0404	15.9201			0.150645	27.7532
2019-12-24_01:00:00	2019-12-24 11:00:02	0	9.37	3.01	0	0	0	298.83	-6.18	0.52	25.68	6.20184	94.8095	14.9	24	5.3	123.5	34.2	139							0									141.372	949.256			2.8224	25.5025			0.813313	35.7824
2019-12-24_02:00:00	2019-12-24 12:00:02	0	8.6	2.87	0.01	0	0	298.84	-6.78	0.85	25.69	6.83307	97.1457	13.6	23.8	4.9	122.4	31.5	115							0.00773994									115.133	1040.06			3.5721	23.6196			3.73678	38.6023
2019-12-24_03:00:00	2019-12-24 13:00:02	0	8.96	2.99	0.01	0	0	298.58	-6.98	1.04	25.43	7.05705	98.4744	5.6	24.6	5.2	111.6	33.4	126							0.00773994									6.8121	1610.42			0.6889	29.16			3.44865	45.3879
2019-12-24_04:00:00	2019-12-24 14:00:02	0	9.36	3.06	0	0	0	298.54	-6.75	1.28	25.39	6.87029	100.737	9	24.6	5.3	104.7	28.7	207							0									35.2836	1343.96			0.6241	28.7296			2.46581	44.2264
2019-12-24_05:00:00	2019-12-24 15:00:02	0	9.46	3.11	0	0	0	298.27	-6.57	0.97	25.12	6.64122	98.3984	13	24.4	4.2	105.4	32.8	295							0									97.8121	1063.41			0.5184	23.9121			5.95955	28.3154
2019-12-24_06:00:00	2019-12-24 16:00:02	0	9.18	3.09	0	0	0	297.96	-6.08	0.76	24.81	6.12732	97.1249	12.4	24.1	5.1	108.6	33.4	290							0									86.6761	1104.23			0.5041	18.3184			1.05538	32.5735
2019-12-24_07:00:00	2019-12-24 17:00:02	0	10.28	3.44	0	0	0	297.54	-5.42	0.23	24.39	5.42488	92.4298	14.3	23.8	4.3	110.9	36.6	334							0									117.94	959.76			0.3481	12.6736			1.26535	17.681
2019-12-24_08:00:00	2019-12-24 18:00:02	0	11.2	3.7	0	0	0	296.84	-5.13	-0.47	23.69	5.15149	84.7654	10.9	23.2	3.9	111.5	33.9	349							0									51.84	1164.17			0.2401	5.1076			1.56622	12.4714
2019-12-24_09:00:00	2019-12-24 19:00:02	0	11.93	3.86	0	0	0	295.89	-3.77	-0.58	22.74	3.81435	81.254	15.2	22.8	3.7	121.2	33.1	292							0									128.596	879.716			0.0036	0.8281			0.0130769	3.97745
2019-12-24_10:00:00	2019-12-24 20:00:02	0	12.5	4.06	0	0	0	295.3	-3.13	-0.9	22.15	3.25682	73.9581	14	22.6	3.5	113	29.4	308							0									98.8036	940.036			0.2025	0.2025			0.0591348	1.52973
2019-12-24_11:00:00	2019-12-24 21:00:02	0	12.69	4.09	0	0	0	294.89	-2.68	-0.78	21.74	2.7912	73.7728	12.4	22.3	3.2	110.8	29.7	319							0									69.0561	1038.77			0.3136	0.3481			0.167117	0.22203
2019-12-24_12:00:00	2019-12-24 22:00:02	0	12.54	4.01	0	0	0	294.41	-2.58	-0.52	21.26	2.63188	78.6048	11.8	22.2	3.2	112.5	33.3	283							0									60.6841	1083.07			0.8836	1.3689			0.322759	0.322759
2019-12-24_13:00:00	2019-12-24 23:00:02	0	13.02	4.18	0	0	0	294.04	-2.6	0.11	20.89	2.60233	92.4225	10.2	22.2	3.6	123.6	36	317							0									36.2404	1179.24			1.7161	2.3716			0.995354	0.995354
2019-12-24_14:00:00	2019-12-25 00:00:02	0	17.88	5.84	0	0	0	294.01	-3.35	0.34	20.86	3.36721	95.7951	10.5	22	2.9	113.2	35.4	377							0									21.7156	1048.46			1.2996	3.1329			0.218285	0.558322
2019-12-24_15:00:00	2019-12-25 01:00:02	0	22.1	7.37	0	0	0	293.85	-3.45	0.19	20.7	3.45523	93.1521	7	21.7	2.6	110.9	26.7	329							0									0.1369	1179.92			1	4.9729			0.731415	0.731415
2019-12-24_16:00:00	2019-12-25 02:00:02	0	19.86	6.67	0	0	0	293.81	-3.34	0.28	20.66	3.35172	94.7919	11.8	21.6	2.1	115.8	26.7	349							0									26.3169	915.062			0.8836	5.6169			1.56679	1.56679
2019-12-24_17:00:00	2019-12-25 03:00:02	0	13.45	4.31	0	0	0	293.92	-3.41	-0.23	20.77	3.41775	86.1415	9	21.4	1.9	134.8	24.9	327							0									21.9961	1253.87			0.3969	6.0516			2.30356	2.30356
2019-12-24_18:00:00	2019-12-25 04:00:02	0	13	4.08	0	0	0	294.33	-3.23	-0.52	21.18	3.27159	80.8545	6.1	21.4	2.1	126.9	27.3	327							0									4.0804	1485.33			0.0484	4.2025			1.37262	1.37262
2019-12-24_19:00:00	2019-12-25 05:00:02	0	20.7	6.74	0	0	0	293.98	-3.09	-0.5	20.83	3.13019	80.8087	5.9	21.5	2.6	106.9	22.7	316							0									0.7056	1301.77			0.4489	5.29			0.281103	0.281103
2019-12-24_20:00:00	2019-12-25 06:00:02	0	26.85	8.86	0	0	0	295.18	-3.84	-0.93	22.03	3.95101	76.386	8.4	21.8	1.9	104.1	30.8	281							0									0.2116	989.732			0.0529	0.64			4.20665	4.20665
2019-12-24_21:00:00	2019-12-25 07:00:02	0	28.81	9.56	0	0	0	295.75	-4.18	-0.97	22.6	4.29107	76.9355	9.4	22.6	2.6	90.7	27.3	307							0									0.0256	885.658			4.54384e-28	0.3249			2.85972	2.85972
2019-12-24_22:00:00	2019-12-25 08:00:02	0	27.67	9.21	0	0	0	296.47	-4.49	-1.18	23.32	4.64247	75.2754	14	22.9	3.4	92.5	23.2	304							0									22.9441	650.76			0.1764	2.5281			1.54372	6.36284
2019-12-24_23:00:00	2019-12-25 09:00:02	0	28.82	9.54	0	0	0	297.12	-5.03	-0.76	23.97	5.08709	81.4081	16.5	23.9	3.8	87.8	29.5	270							0									48.4416	514.382			0.0049	10.4976			1.6566	11.3373
2019-12-25_00:00:00	2019-12-25 10:00:02	0	26.86	8.78	0	0	0	297.52	-5.84	-0.61	24.37	5.87177	84.0371	14.8	24.5	4	74.3	25.4	234							0									36.2404	632.02			0.0169	17.9776			3.50353	18.9379
2019-12-25_01:00:00	2019-12-25 11:00:02	0	22.66	7.33	0	0	0	297.81	-6.31	-0.7	24.66	6.34871	83.6699	11.9	24.9	4.3	91.9	25.3	203							0									20.8849	869.66			0.0576	24.3049			4.19721	26.3037
2019-12-25_02:00:00	2019-12-25 12:00:02	0	19.79	6.4	0	0	0	297.86	-6.83	-0.62	24.71	6.85808	84.8133	17.1	24.5	5.3	106.8	25.1	196							0									114.49	636.048			0.0441	20.9764			2.42762	44.0641
2019-12-25_03:00:00	2019-12-25 13:00:02	0	17.75	5.79	0	0	0	297.78	-7	-0.55	24.63	7.02157	85.5076	12	24.5	5.5	105.6	32.2	168							0									38.5641	956.665			0.0169	20.25			2.31519	49.022
2019-12-25_04:00:00	2019-12-25 14:00:02	0	16.56	5.47	0	0	0	297.72	-7	-0.72	24.57	7.03693	84.1275	8.5	24.2	6	106.2	24.9	207							0									9.1809	1207.56			0.1369	17.1396			1.07523	56.5043
2019-12-25_05:00:00	2019-12-25 15:00:02	0	16.59	5.54	0	0	0	297.54	-6.94	-0.72	24.39	6.97725	84.0771	9.7	24.5	5.3	96.4	36	263							0									17.3056	1120.91			0.0121	18.1476			2.81316	45.6604
2019-12-25_06:00:00	2019-12-25 16:00:02	0	16.99	5.73	0	0	0	297.22	-6.74	-1.04	24.07	6.81977	81.2284	16.3	24.4	4.4	88.3	21.5	275							0									111.725	712.356			0.1089	14.7456			5.85526	32.4873
2019-12-25_07:00:00	2019-12-25 17:00:02	0	17.42	5.94	0	0	0	296.73	-6.33	-1.28	23.58	6.45812	78.5684	9.3	24	3.7	82.8	20.8	344							0									11.2896	1120.91			0.1764	8.7025			7.60722	21.5121
2019-12-25_08:00:00	2019-12-25 18:00:02	0	18.12	6.21	0	0	0	295.99	-5.76	-1.44	22.84	5.93727	75.9639	13.1	23.4	4.1	87.9	25.5	377							0									47.4721	864.948			0.3136	2.5921			3.37557	20.4057
2019-12-25_09:00:00	2019-12-25 19:00:02	0	18.17	6.25	0	0	0	295.12	-4.59	-1.57	21.97	4.85108	71.117	12.8	22.8	3.4	85.9	28.4	382							0									42.9025	880.309			0.6889	0.6889			2.10564	7.45881
2019-12-25_10:00:00	2019-12-25 20:00:02	0	18.16	6.24	0	0	0	294.64	-3.94	-1.95	21.49	4.39615	63.6682	9.3	22.3	1.6	278.9	30.1	386							0									9.3636	1100.91			0.6561	0.7056			7.81843	7.81843
2019-12-25_11:00:00	2019-12-25 21:00:02	0	18.05	6.22	0	0	0	294.2	-3.39	-1.92	21.05	3.89596	60.4741	-1.2	22.1	2.2	284.9	34.2	453							0									55.0564	1909.69			1.1025	2.1904			2.87628	2.87628
2019-12-25_12:00:00	2019-12-25 22:00:02	0	16.7	5.84	0	0	0	293.76	-2.93	-1.87	20.61	3.47589	57.4531	10.3	22.1	2.5	299.5	32.5	420							0									19.8916	1061.46			2.2201	3.6864			0.952358	0.952358
2019-12-25_13:00:00	2019-12-25 23:00:02	0	15.12	5.35	0	0	0	293.25	-2.56	-1.9	20.1	3.18804	53.4178	11.2	21.9	2.1	48.4	31	374							0									34.2225	1034.91			3.24	6.9169			1.18383	1.18383
2019-12-25_14:00:00	2019-12-26 00:00:02	0	14.7	5.22	0	0	0	292.57	-2.14	-1.8	19.42	2.79635	49.9322	12.8	21.6	2.1	49.7	29	406							0									57.4564	942.49			4.7524	13.0321			0.48491	0.48491
2019-12-25_15:00:00	2019-12-26 01:00:02	0	14.41	5.16	0	0	0	292.04	-2.04	-1.61	18.89	2.59879	51.7191	14.5	21.4	2.1	50.1	26	376							0									87.2356	844.484			6.3001	18.8356			0.24879	0.674389
2019-12-25_16:00:00	2019-12-26 02:00:02	0	14.54	5.2	0	0	0	291.65	-1.97	-1.69	18.5	2.59557	49.3749	10.9	21.2	2.5	56.2	27	368							0									32.49	1064.06			7.29	24.3049			0.00913423	0.180138
2019-12-25_17:00:00	2019-12-26 03:00:02	0	14.46	5.19	0	0	0	290.89	-1.74	-1.66	17.74	2.40483	46.348	8	21	3	58.1	22.2	390							0									7.8961	1262.38			10.6276	34.6921			0.354229	0.354229
2019-12-25_18:00:00	2019-12-26 04:00:02	0	13.98	5.05	0	0	0	290.17	-1.58	-1.74	17.02	2.35032	42.241	10.8	20.9	2.8	54.2	23.5	455							0									33.0625	1080.44			15.0544	45.0241			0.202213	0.202213
2019-12-25_19:00:00	2019-12-26 05:00:02	0	13.12	4.81	0	0	0	289.68	-1.42	-1.87	16.53	2.34804	37.2116	11.9	20.8	2.1	54.4	24.1	431							0									50.2681	1024.64			18.2329	53.29			0.0615247	1.14909
2019-12-25_20:00:00	2019-12-26 06:00:02	0	12.72	4.7	0	0	0	292.64	-1.37	-1.79	19.49	2.25411	37.4292	12.5	21.1	2.5	57.6	24.4	494							0									60.84	993.51			2.5921	16.3216			0.0604632	0.586592
2019-12-25_21:00:00	2019-12-26 07:00:02	0	12.71	4.64	0	0	0	294.86	-2.51	-1.85	21.71	3.11811	53.608	7.2	21.9	2.5	58.1	28	551							0									6.5536	1360.13			0.0361	1.0404			0.382058	0.382058
2019-12-25_22:00:00	2019-12-26 08:00:02	0	12.89	4.72	0	0	0	296	-3.24	-1.49	22.85	3.56619	65.3035	9.7	23.2	2.8	54.4	22.5	558							0									24.8004	1176.49			0.1225	2.0164			0.587045	0.716035
2019-12-25_23:00:00	2019-12-26 09:00:02	0	12.81	4.72	0	0	0	296.85	-4.37	-0.96	23.7	4.4742	77.6102	9.7	24.8	3	65.7	22.3	394							0									24.8004	1176.49			1.21	14.9769			2.17328	3.81891
2019-12-26_00:00:00	2019-12-26 10:00:02	0	12.97	4.79	0	0	0	297.31	-5.54	-0.67	24.16	5.58037	83.1044	10.4	25.4	3.6	88.3	25	484							0									31.4721	1124.26			1.5376	24.3049			3.92185	13.3983
2019-12-26_01:00:00	2019-12-26 11:00:02	0	11.75	4.45	0	0	0	297.62	-5.98	-0.49	24.47	6.00004	85.3158	9.7	25.2	4.9	97	23.5	366							0									27.5625	1195.08			0.5329	25.4016			1.21009	28.9448
2019-12-26_02:00:00	2019-12-26 12:00:02	0	11.2	4.27	0	0	0	297.77	-6.27	-0.48	24.62	6.28835	85.6224	11.6	25.8	4.8	89.1	22.6	530							0									53.7289	1079.12			1.3924	33.5241			2.21517	31.0065
2019-12-26_03:00:00	2019-12-26 13:00:02	0	10.28	3.99	0	0	0	297.87	-6.4	-0.7	24.72	6.43817	83.7582	0.9	25.8	5.3	86.1	21.3	475							0									9.5481	1921.07			1.1664	34.6921			1.29543	38.6656
2019-12-26_04:00:00	2019-12-26 14:00:02	0	10.28	3.98	0	0	0	297.92	-6.5	-1.04	24.77	6.58267	80.9099	3.2	25.7	5.2	89.1	20.6	528							0									0.6084	1725.57			0.8649	34.1056			1.91179	39.2211
2019-12-26_05:00:00	2019-12-26 15:00:02	0	10.21	3.94	0	0	0	297.89	-6.6	-1.47	24.74	6.76172	77.4438	4.5	25.3	4.8	76.4	24.3	453							0									0.3136	1622.48			0.3136	29.2681			3.84836	36.5024
2019-12-26_06:00:00	2019-12-26 16:00:03	0	10.54	4.02	0	0	0	297.6	-6.5	-2.02	24.45	6.80664	72.7365	4.7	24.9	5.1	81.3	19.7	393							0									0.4624	1600			0.2025	22.2784			2.91263	40.7892
2019-12-26_07:00:00	2019-12-26 17:00:03	0	10.78	4.09	0	0	0	297.08	-6.31	-2.46	23.93	6.77257	68.7014	5.4	24.6	4.1	80.7	23.9	430							0									1.7161	1538.99			0.4489	15.21			7.14263	28.65
2019-12-26_08:00:00	2019-12-26 18:00:03	0	10.68	4.07	0	0	0	296.21	-5.81	-3.05	23.06	6.56191	62.3026	11.4	23.9	4	68.9	20.9	425							0									53.7289	1105.56			0.7056	5.4289			6.56336	25.4208
2019-12-26_09:00:00	2019-12-26 19:00:03	0	10.51	4.02	0	0	0	294.85	-4.51	-3.17	21.7	5.51262	54.8974	3.3	23.2	3.6	62.8	30.3	390							0									0.5184	1713.96			2.25	2.25			3.65812	12.9069
2019-12-26_10:00:00	2019-12-26 20:00:03	0	10.1	3.86	0	0	0	293.85	-3.67	-3.43	20.7	5.02333	46.9361	8.8	22.7	3.3	57.1	29.9	303							0									24.4036	1300.32			4	4			2.96985	7.85863
2019-12-26_11:00:00	2019-12-26 21:00:03	0	10.15	3.88	0	0	0	293.06	-2.92	-3.26	19.91	4.37653	41.8511	12.1	22.5	2.4	48.2	17.3	234							0									67.5684	1071.91			6.7081	6.7081			3.90666	3.90666
2019-12-26_12:00:00	2019-12-26 22:00:03	0	10.47	3.96	0	0	0	292.33	-2.52	-3.12	19.18	4.01059	38.9277	8.9	22.1	2.3	50.1	15.9	205							0									24.4036	1285.94			8.5264	11.2225			2.9261	2.9261
2019-12-26_13:00:00	2019-12-26 23:00:03	0	10.86	4.09	0	0	0	291.58	-2.18	-2.81	18.43	3.55647	37.8044	5.8	21.7	1.6	46.8	14.9	210							0									2.9241	1507.77			10.6929	20.25			3.82779	3.82779
2019-12-26_14:00:00	2019-12-27 00:00:03	0	10.78	4.09	0	0	0	290.72	-1.86	-2.31	17.57	2.96575	38.8409	2.5	21.4	1.4	72.1	11.7	196							0									2.5281	1774.94			14.6689	32.0356			2.45159	2.45159
2019-12-26_15:00:00	2019-12-27 01:00:03	0	11.36	4.29	0	0	0	290.12	-1.77	-2.12	16.97	2.76176	39.8588	4	21.2	1.4	68.3	12.1	173							0									0.0841	1634.58			17.8929	41.7316			1.85438	1.85438
2019-12-26_16:00:00	2019-12-27 02:00:03	0	11.7	4.44	0	0	0	289.29	-1.52	-1.94	16.14	2.46455	38.079	1.3	21	1.6	74.4	11.2	178							0									9.8596	1847.28			23.6196	56.1001			0.747444	2.11834
2019-12-26_17:00:00	2019-12-27 03:00:03	0	12.16	4.6	0	0	0	289.18	-1.46	-2.4	16.03	2.8092	31.3136	-2.3	20.8	1.7	65.2	11.4	164							0									47.61	2154.82			22.7529	60.84			1.23032	1.23032
2019-12-26_18:00:00	2019-12-27 04:00:03	0	12.58	4.76	0	0	0	288.68	-1.37	-2.43	15.53	2.78959	29.4138	6.3	20.6	1.6	60.4	10.2	309							0									2.3716	1418.28			25.7049	72.25			1.41512	1.41512
2019-12-26_19:00:00	2019-12-27 05:00:03	0	12.64	4.79	0	0	0	288.28	-1.27	-2.41	15.13	2.72415	27.788	4.9	20.5	2.1	56	13.6	210							0									0.0121	1523.34			28.8369	81			0.389565	0.484205
2019-12-26_20:00:00	2019-12-27 06:00:03	0	12.62	4.81	0	0	0	291.53	-1.22	-2.79	18.38	3.04508	23.6187	4.2	20.8	2.2	54.9	15.8	240							0									0.3721	1576.88			5.8564	29.7025			0.714157	0.714157
2019-12-26_21:00:00	2019-12-27 07:00:03	0	12.19	4.64	0	0	0	294.27	-1.71	-3.39	21.12	3.79687	26.7676		21.6	2.2	55.1	14.4	275							0									21.5296	1943.05			0.2304	3.6481			2.54998	2.54998
2019-12-26_22:00:00	2019-12-27 08:00:03	0	11.05	4.26	0	0	0	296	-2.21	-3.21	22.85	3.8972	34.5465	8.2	23	2.6	55	12.9	192							0									15.5236	1314.79			0.0225	1.4884			1.68274	1.68274
2019-12-26_23:00:00	2019-12-27 09:00:03	0	10.06	3.91	0	0	0	297.5	-2.62	-2.63	24.35	3.71232	44.891	10	24.6	3.1	58.3	11.7	255							0									37.0881	1211.74			0.0625	18.6624			0.374933	1.67008
2019-12-27_00:00:00	2019-12-27 10:00:03	0	10.02	3.87	0	0	0	298.58	-3.56	-1.72	25.43	3.95373	64.2128	7.7	25.5	3.1	79.9	19	321							0									14.6689	1380.12			0.0049	39.69			0.728859	2.35234
2019-12-27_01:00:00	2019-12-27 11:00:03	0	10.49	4	0	0	0	299.13	-4.91	-1.2	25.98	5.05451	76.2663	4.4	25.2	4.7	99.6	15.6	79							0									0.16	1625.7			0.6084	42.9025			0.125679	17.9311
2019-12-27_02:00:00	2019-12-27 12:00:03	0	10.96	4.16	0	0	0	299.31	-6.25	-0.97	26.16	6.32482	81.1782	8.4	25.6	4.8	96	14	181							0									17.9776	1307.55			0.3136	50.8369			2.32509	31.4141
2019-12-27_03:00:00	2019-12-27 13:00:03	0	11.12	4.87	0.06	0	0	299.2	-7.17	-1.15	26.05	7.26164	80.8881	4.5	25.2	5.6	96.8	18.8	90							0.0464396									0.1369	1548.42			0.7225	43.8244			2.76104	53.8997
2019-12-27_04:00:00	2019-12-27 14:00:03	0	12.62	6.59	0.17	0	0	298.94	-7.54	-1.59	25.79	7.70582	78.0923	-1.9	25.1	5.5	99	18.7	205							0.131579									72.0801	1938.64			0.4761	39.1876			4.86565	59.0719
2019-12-27_05:00:00	2019-12-27 15:00:03	0	17.48	9.26	0.27	0	0	298.72	-7.62	-2.26	25.57	7.94808	73.4804	1.4	25	5.9	90.5	17.3	190							0.208978									61.7796	1448.56			0.3249	35.2836			4.19464	69.3569
2019-12-27_06:00:00	2019-12-27 16:00:03	0	22.95	12.38	0.39	0	0	298.38	-7.55	-2.91	25.23	8.09139	68.922	2.7	24.7	5.4	86.1	14.6	220							0.301858									93.7024	1131.65			0.2809	28.09			7.24358	63.5431
2019-12-27_07:00:00	2019-12-27 17:00:03	0	22.6	12.26	0.39	0	0	297.75	-7.05	-3.45	24.6	7.84889	63.9248	6.6	24.1	4.7	79.1	22.1	247							0.301858									32.0356	891.62			0.25	16.5649			9.91548	49.4052
2019-12-27_08:00:00	2019-12-27 18:00:03	0	23.84	12.72	0.4	0	0	296.74	-6.23	-4.11	23.59	7.46358	56.5868	2.6	23.4	3.8	70.2	21.3	210							0.309598									102.414	1115.56			0.0361	5.5696			13.4218	32.9887
2019-12-27_09:00:00	2019-12-27 19:00:03	0	24.09	12.61	0.38	0	0	295.34	-4.79	-3.98	22.19	6.22772	50.277	-1	22.7	3.7	66.3	22.7	204							0.294118									185.232	1377.15			0.2601	0.2601			6.38937	19.428
2019-12-27_10:00:00	2019-12-27 20:00:03	0	21.49	10.56	0.26	0	0	294.42	-4.38	-4.24	21.27	6.09606	45.9306	10.2	22.2	3.8	63.1	23.3	114							0.201238									0.1296	781.762			0.8649	1.3456			5.27191	19.1499
2019-12-27_11:00:00	2019-12-27 21:00:03	0	18.36	7.98	0.11	0	0	293.91	-4.05	-4.38	20.76	5.96548	42.7584	4.5	22.2	3.3	55.8	28.5	98							0.0851393									12.1104	1313.34			2.0736	2.7889			7.10476	14.0286
2019-12-27_12:00:00	2019-12-27 22:00:03	0	16.45	6.37	0.02	0	0	293.41	-3.67	-4.34	20.26	5.6837	40.2187	13	22.1	3.1	49.6	25.3	134							0.0154799									43.9569	861.422			3.3856	5.1529			6.67553	10.6518
2019-12-27_13:00:00	2019-12-27 23:00:03	0	15.99	6.13	0.01	0	0	292.81	-3.3	-4.32	19.66	5.43621	37.3759	12.3	21.7	2.1	43.2	11.7	131							0.00773994									38.0689	917.484			4.1616	10.6929			11.1303	11.1303
2019-12-27_14:00:00	2019-12-28 00:00:03	0	15.31	5.87	0.01	0	0	292.14	-2.91	-3.61	18.99	4.63683	38.8722	5.2	21.3	1.6	54.9	11.2	114							0.00773994									0.4489	1417.52			5.3361	18.8356			9.22234	9.22234
2019-12-27_15:00:00	2019-12-28 01:00:03	0	14.21	5.59	0.01	0	0	291.49	-2.94	-3.23	18.34	4.36767	42.3091		21.1	2.2	56.7	10	90							0.00773994									31.2481	1860.2			7.6176	26.9361			4.69877	4.69877
2019-12-27_16:00:00	2019-12-28 02:00:03	0	13.1	5.42	0.03	0	0	291.03	-2.95	-3.19	17.88	4.34495	42.7617	-1.8	20.7	2.2	50.1	10.7	130							0.0232198									52.1284	2034.01			7.9524	36.6025			4.60082	4.60082
2019-12-27_17:00:00	2019-12-28 03:00:03	0	12.31	5.5	0.05	0	0	290.67	-2.82	-3.39	17.52	4.40959	39.7558	-0.9	20.3	2.1	44.3	11.4	115							0.0386997									40.96	1946.57			7.7284	46.3761			5.33421	5.33421
2019-12-27_18:00:00	2019-12-28 04:00:03	0	12.16	6.04	0.09	0	0	290.01	-2.32	-3.55	16.86	4.24086	33.1656	-0.7	19.7	1.9	8.5	15.8	129							0.0696594									45.4276	1881.82			8.0656	65.1249			5.47963	5.47963
2019-12-27_19:00:00	2019-12-28 05:00:03	0	12.93	7.35	0.18	0	0	288.92	-1.32	-3.57	15.77	3.80622	20.2919	20.3	19.5	1.5	9.7	9.4	220							0.139319									167.703	443.945			13.9129	87.6096			5.31864	5.31864
2019-12-27_20:00:00	2019-12-28 06:00:03	0	14.33	9.1	0.28	0	0	290.75	-0.63	-3.4	17.6	3.45788	10.4976	24.7	19.6	1.4	24.6	12.8	686							0.216718									243.36	243.36			4	55.2049			4.23485	4.23485
2019-12-27_21:00:00	2019-12-28 07:00:03	0	15.6	10.54	0.36	0	0	293.89	-0.41	-3.05	20.74	3.07743	7.65624	6.2	20.7	2.6	0.7	14.5	619							0.278638									18.8356	1022.72			0.0016	10.1761			0.227943	0.227943
2019-12-27_22:00:00	2019-12-28 08:00:03	0	17.11	12.23	0.46	0	0	296.97	-0.64	-2.81	23.82	2.88196	12.8308	9.9	22.3	2.5	9.5	23.9	106							0.356037									5.4289	707.028			2.3104	2.3104			0.145894	0.145894
2019-12-27_23:00:00	2019-12-28 09:00:03	0	18.57	13.82	0.54	0	0	299.53	-0.87	-2.29	26.38	2.44969	20.8025	19.9	24.5	2.4	13.2	35.7	76							0.417957									36.9664	225			3.5344	39.0625			0.00246948	0.44931
2019-12-28_00:00:00	2019-12-28 10:00:03	0	16.56	12.04	0.45	0	0	301.43	-1.73	-1.99	28.28	2.63685	41.0021	19.9	26.6	2.1	58.3	43.7	134							0.348297									61.7796	281.568			2.8224	105.063			0.288212	0.613317
2019-12-28_01:00:00	2019-12-28 11:00:03	0	15.03	10.5	0.37	0	0	302.71	-3.04	-1.82	29.56	3.54316	59.0918	27.3	26.8	3.3	77.7	25.4	89							0.286378									282.24	282.24			7.6176	137.593			0.059128	1.75076
2019-12-28_02:00:00	2019-12-28 12:00:03	0	13.67	8.93	0.29	0	0	303.54	-4.56	-1.89	30.39	4.93616	67.4874	14.6	26.6	3.7	66.1	25.8	75							0.224458									32.1489	634.536			14.3641	152.77			1.5281	9.71047
2019-12-28_03:00:00	2019-12-28 13:00:03	0	13.32	7.82	0.22	0	0	303.79	-5.84	-2.21	30.64	6.24417	69.2723	19	26.2	4.9	61.4	31.7	90							0.170279									124.992	479.61			19.7136	149.084			1.8068	31.6313
2019-12-28_04:00:00	2019-12-28 14:00:03	0	15.31	8.29	0.22	0	0	303.59	-6.61	-2.93	30.44	7.23028	66.094	20.2	26.4	4.8	65	31.6	139							0.170279									141.848	409.253			16.3216	149.084			5.90628	42.3838
2019-12-28_05:00:00	2019-12-28 15:00:03	0	19.72	10.83	0.32	0	0	303.11	-6.66	-3.36	29.96	7.45957	63.229	12.7	26.6	4.5	62.6	33.8	197							0.247678									3.4969	634.536			11.2896	142.325			8.75906	41.4681
2019-12-28_06:00:00	2019-12-28 16:00:03	0	22.36	12.48	0.4	0	0	302.58	-6.25	-3.89	29.43	7.3617	58.102	11.4	26.7	4.5	63.5	38.1	195							0.309598									1.1664	617.026			7.4529	132.25			8.18932	40.2171
2019-12-28_07:00:00	2019-12-28 17:00:03	0	21.97	11.9	0.35	0	0	301.68	-5.51	-4.12	28.53	6.88001	53.2135	7.2	26.5	3.9	70.4	53.9	345							0.270898									22.09	877.344			4.1209	108.16			8.88044	27.6677
2019-12-28_08:00:00	2019-12-28 18:00:03	0	22.45	11.63	0.31	0	0	300.24	-4.5	-4.17	27.09	6.13506	47.1799	11.6	25.7	3.9	59.7	50.5	575							0.239938									0.0009	649.74			1.9321	66.5856			4.99547	20.3857
2019-12-28_09:00:00	2019-12-28 19:00:03	0	22.23	10.89	0.24	0	0	297.96	-3.7	-4.1	24.81	5.52268	42.0644	5	24.9	2.9	73.1	37.8	688							0.185759									34.6921	1077.81			0.0081	25.8064			6.87845	8.42555
2019-12-28_10:00:00	2019-12-28 20:00:03	0	20.03	9.02	0.13	0	0	296.64	-3.48	-4.59	23.49	5.76008	37.1684	11.5	23.9	2.4	47.8	37	336							0.100619									6.1504	795.24			0.1681	7.6176			11.2901	11.2901
2019-12-28_11:00:00	2019-12-28 21:00:03	0	17.17	7.28	0.05	0	0	295.95	-2.84	-4.42	22.8	5.25376	32.7222	13.4	23	1.6	33.6	33.8	282							0.0386997									37.4544	786.242			0.04	1.3689			13.35	13.35
2019-12-28_12:00:00	2019-12-28 22:00:03	0	15.87	6.75	0.03	0	0	295.06	-2.41	-3.11	21.91	3.93449	37.7729	4.1	22.7	2.1	33.5	24.9	222							0.0232198									7.0225	1434.14			0.6241	0.6241			3.36535	3.36535
2019-12-28_13:00:00	2019-12-28 23:00:03	0	16.33	7.66	0.1	0	0	294.25	-2.61	-2.61	21.1	3.6911	45.0001	6.1	21.9	1.6	55.6	23.3	200							0.0773994									2.4336	1222.2			0.64	2.6569			4.37269	4.37269
2019-12-28_14:00:00	2019-12-29 00:00:03	0	17.05	8.89	0.18	0	0	293.63	-2.93	-2.5	20.48	3.85161	49.5279	7.3	21.2	2	45.5	22	190							0.139319									2.5281	1058.2			0.5184	8.7025			3.42846	3.42846
2019-12-28_15:00:00	2019-12-29 01:00:03	0	16.5	9.07	0.21	0	0	293.2	-3.18	-3	20.05	4.37177	46.6685	3.2	20.7	1.8	23.1	30.8	221							0.162539									34.4569	1328.6			0.4225	15.0544			6.61402	6.61402
2019-12-28_16:00:00	2019-12-29 02:00:03	0	15.01	8.36	0.18	0	0	292.92	-3.16	-3.55	19.77	4.75269	41.6737	4.2	20.4	0.7	334.7	14.4	223							0.139319									17.3056	1307.55			0.3969	19.8916			16.4243	16.4243
2019-12-28_17:00:00	2019-12-29 03:00:03	0	14.19	7.99	0.17	0	0	292.29	-2.26	-3.09	19.14	3.82828	36.1815	10.4	18.8	0.5	219.4	14.9	270							0.131579									5.8081	919.909			0.1156	44.7561			11.0774	11.0774
2019-12-28_18:00:00	2019-12-29 04:00:03	0	15.29	9.39	0.25	0	0	291.24	-1.31	-2.85	18.09	3.13665	24.6859	8.9	18.4	0.6	189.1	40.4	236							0.193498									0.2401	925.985			0.0961	66.2596			6.43461	6.43461
2019-12-28_19:00:00	2019-12-29 05:00:03	0	22.56	16.91	0.66	0	0	290.45	-1.04	-2.47	17.3	2.68002	22.8337		18.3	0.4	194	42.2	439							0.510836									285.948	1011.88			1	81.5409			5.19849	5.95351
2019-12-28_20:00:00	2019-12-29 06:00:03	0	30.53	24.78	1.05	0	0.01	292.55	-0.63	-2.13	19.4	2.22122	16.477	2.3	19	0.9	83.6	39.7	361							0.812693									505.35	505.35			0.16	38.8129			1.74561	5.75417
2019-12-28_21:00:00	2019-12-29 07:00:03	0	35.39	29.43	1.28	0	0.01	296.04	-0.34	-2.11	22.89	2.13722	9.15389	5.7	20.8	1.8	10.2	31.7	192							0.990712									563.113	563.113			4.3681	4.3681			0.113716	2.5052
2019-12-28_22:00:00	2019-12-29 08:00:03	0	37.59	31.73	1.41	0.01	0.01	299.73	0	-1.87	26.58	1.87	7.60198e-05	16.6	22.6	2.4	356.4	44.9	183							1.09133									228.917	228.917			15.8404	20.7025			0.2809	1.5625
2019-12-28_23:00:00	2019-12-29 09:00:03	0	30.99	25.77	1.12	0.01	0.01	302.67	-0.24	-2.02	29.52	2.03421	6.77574	29.1	24.6	2.1	22	59.2	239							0.866873									11.0889	37.8225			24.2064	90.0601			0.00432866	1.92042
2019-12-29_00:00:00	2019-12-29 10:00:03	0	25.1	20.35	0.85	0	0.01	304.96	-1.38	-1.84	31.81	2.3	36.87	35.8	26.1	2.4	57	67	215							0.657895									238.702	238.702			32.6041	176.358			0.01	0.6724
2019-12-29_01:00:00	2019-12-29 11:00:03	0	22.29	17.62	0.71	0	0.01	306.3	-2.81	-1.39	33.15	3.135	63.6803	35.9	27.2	2.6	46.4	53.5	357							0.549536									334.158	334.158			35.4025	247.118			0.286221	0.286221
2019-12-29_02:00:00	2019-12-29 12:00:03	0	20.86	15.81	0.6	0	0	306.58	-4.7	-1.08	33.43	4.82249	77.059	24.9	29.3	2.6	59.7	44.2	390							0.464396									82.6281	82.6281			17.0569	327.61			4.93946	4.93946
2019-12-29_03:00:00	2019-12-29 13:00:03	0	19.93	13.97	0.48	0	0	306.13	-6.03	-1.51	32.98	6.21619	75.9415	33.4	30	2.4	50.5	46.9	324							0.371517									377.525	377.525			8.8804	336.723			14.5633	14.5633
2019-12-29_04:00:00	2019-12-29 14:00:03	0	18.47	11.63	0.34	0	0	306.03	-6.35	-2.13	32.88	6.69772	71.457	33.4	29.6	3.7	75.1	46.9	360							0.263158									473.933	473.933			10.7584	318.622			8.9863	23.7921
2019-12-29_05:00:00	2019-12-29 15:00:03	0	16.82	9.47	0.21	0	0	305.67	-6.22	-2.43	32.52	6.67782	68.6608	31.9	30.5	3.2	63.2	56.8	372							0.162539									503.105	503.105			4.0804	338.192			12.0952	18.9906
2019-12-29_06:00:00	2019-12-29 16:00:03	0	15.71	8.16	0.14	0	0	305.2	-5.78	-2.96	32.05	6.49384	62.8827	32.5	28.9	3.1	53.1	62.9	498							0.108359									592.436	592.436			9.9225	266.342			11.5182	16.5962
2019-12-29_07:00:00	2019-12-29 17:00:03	0	15.5	7.01	0.06	0	0	303.95	-5.24	-3.31	30.8	6.19788	57.7204	23.9	26.7	2.5	35.8	56.8	1030							0.0464396									285.272	317.196			16.81	165.637			13.6743	13.6743
2019-12-29_08:00:00	2019-12-29 18:00:03	0	16.73	6.88	0.02	0	0	302.22	-4.25	-3.37	29.07	5.42397	51.5878	14.4	25.6	2.2	16.1	49.2	1385							0.0154799									56.5504	752.954			12.0409	100.802			10.394	10.394
2019-12-29_09:00:00	2019-12-29 19:00:03	0	18.53	7.42	0.01	0	0	299.66	-3.64	-3.48	26.51	5.03587	46.2874	9.2	23.8	2.8	304.3	46.3	1139							0.00773994									3.1684	1030.41			7.3441	32.2624			4.99912	5.36326
2019-12-29_10:00:00	2019-12-29 20:00:03	0	20.29	8.11	0.01	0	0	298.15	-3.34	-3.58	25	4.89612	43.0138	6.9	23.5	2.7	297.9	47.6	924							0.00773994									1.4641	1136.36			2.25	14.9769			4.82295	4.82295
2019-12-29_11:00:00	2019-12-29 21:00:03	0	19.66	8.08	0.01	0	0	297.28	-2.89	-3.39	24.13	4.45468	40.4479	3	23.1	2	304.9	41.8	632							0.00773994									25.8064	1416.77			1.0609	6.76			6.02547	6.02547
2019-12-29_12:00:00	2019-12-29 22:00:03	0	17.44	7.53	0.03	0	0	296.54	-2.88	-3.09	23.39	4.22404	42.9855	-1.1	22.5	0.8	96.9	33	613							0.0232198									74.4769	1788.44			0.7921	1.5876			11.724	11.724
2019-12-29_13:00:00	2019-12-29 23:00:03	0	17.64	8.73	0.12	0	0	295.76	-2.92	-2.92	22.61	4.1295	45.0001	8.9	21.3	1.2	162.7	63.7	571							0.0928793									0.0289	966.588			1.7161	1.7161			8.58199	8.58199
2019-12-29_14:00:00	2019-12-30 00:00:03	0	17.88	9.32	0.16	0	0	294.92	-2.77	-2.84	21.77	3.96718	44.2852	15.3	20.3	1.3	160.3	50.9	645							0.123839									35.7604	580.81			2.1609	6.5536			7.11384	7.11384
2019-12-29_15:00:00	2019-12-30 01:00:03	0	16.58	8.34	0.12	0	0	294.21	-2.55	-2.58	21.06	3.62752	44.6651	3.1	19.6	0.8	166.4	49.8	574							0.0928793									27.4576	1389.8			2.1316	15.7609			7.99487	7.99487
2019-12-29_16:00:00	2019-12-30 02:00:03	0	15.31	7.47	0.07	0	0	293.64	-2.5	-3.03	20.49	3.92822	39.5256	15.6	19.1	0.9	161.1	48.9	475							0.0541796									66.0969	657.922			1.9321	25.4016			9.17011	9.17011
2019-12-29_17:00:00	2019-12-30 03:00:03	0	14.51	7.32	0.08	0	0	293.03	-2.3	-3.1	19.88	3.86005	36.5731	5.1	18.5	0.4	190.5	28.2	507							0.0619195									4.9284	1317.69			1.9044	39.0625			11.972	11.972
2019-12-29_18:00:00	2019-12-30 04:00:03	0	14.84	8.37	0.16	0	0	292.3	-1.95	-2.93	19.15	3.51957	33.645	5.1	18.4	0.3	111.7	26.4	399							0.123839									10.6929	1242.56			0.5625	50.1264			10.3657	10.3657
2019-12-29_19:00:00	2019-12-30 05:00:03	0	16.42	10.54	0.29	0	0	291.66	-1.66	-2.87	18.51	3.31549	30.0451	15.9	19.4	0.5	6.4	26.4	365							0.224458									28.7296	496.398			0.7921	45.1584			7.92701	7.92701
2019-12-29_20:00:00	2019-12-30 06:00:03	0	19.12	13.58	0.46	0	0	293.46	-1.27	-2.96	20.31	3.22095	23.222	10.1	20.2	1	27.8	33.5	348							0.356037									12.1104	627.002			0.0121	16.9744			4.93261	4.93261
2019-12-29_21:00:00	2019-12-30 07:00:03	0.01	23.09	17.56	0.67	0	0	296.74	-0.86	-2.29	23.59	2.44616	20.5836	6.7	20.8	1.3	16.9	37.8	244							0.518576									117.94	598.292			7.7841	7.7841			1.31368	3.14651
2019-12-29_22:00:00	2019-12-30 08:00:03	0.02	33.17	27.24	1.16	0	0.01	300.33	-0.93	-1.54	27.18	1.79903	31.1277	10.1	21.9	1.9	7	22.4	353							0.897833									293.78	293.78			27.8784	27.8784			0.0101954	3.31594
2019-12-29_23:00:00	2019-12-30 09:00:03	0.03	32.81	26.9	1.14	0.01	0.01	302.8	-0.97	-1.65	29.65	1.914	30.4505	18.5	24.1	1.6	20.3	52.1	175							0.882353									70.56	70.56			30.8025	83.1744			0.0985967	4.02403
2019-12-30_00:00:00	2019-12-30 10:00:03	0.03	29.79	23.86	0.99	0	0.01	304.88	-2.17	-1.65	31.73	2.72606	52.7519	27.9	26.5	1.8	42	63.5	161							0.766254									16.3216	16.3216			27.3529	184.96			0.857586	0.987918
2019-12-30_01:00:00	2019-12-30 11:00:03	0.04	26.77	20.68	0.82	0	0.01	306.13	-3.68	-1.75	32.98	4.07491	64.567	37	28	2.2	48.7	66.1	109							0.634675									266.342	266.342			24.8004	267.323			3.51529	3.51529
2019-12-30_02:00:00	2019-12-30 12:00:03	0.03	24.56	18.24	0.69	0	0	306.85	-4.96	-2.01	33.7	5.35179	67.9403	34.4	27.8	2.8	51.4	36.5	100							0.534056									261.146	261.146			34.81	284.597			6.51165	6.92634
2019-12-30_03:00:00	2019-12-30 13:00:03	0.01	21.29	14.66	0.5	0	0	307	-5.8	-2.4	33.85	6.27694	67.5207	8.7	28.3	2.9	57.1	38.1	149							0.386997									35.5216	643.13			30.8025	306.95			11.4037	13.3732
2019-12-30_04:00:00	2019-12-30 14:00:03	0	16.63	9.31	0.23	0	0	306.79	-6.37	-2.8	33.64	6.95823	66.2717	11.2	28.1	3.2	50	45.2	490							0.178019									3.5721	795.804			30.6916	292.752			14.1243	21.5131
2019-12-30_05:00:00	2019-12-30 15:00:03	0	16.07	7.22	0.09	0	0	306.12	-6.55	-3.19	32.97	7.28551	64.033	19.9	28.3	3.4	54.5	50.7	502							0.0696594									160.782	466.56			21.8089	276.89			15.0972	26.6825
2019-12-30_06:00:00	2019-12-30 16:00:03	0	18.01	7.79	0.1	0	0	305.11	-6.27	-3.56	31.96	7.21017	60.4129	18.2	26.9	3.3	42.5	47	524							0.0773994									108.368	516.653			25.6036	202.493			15.2894	24.9018
2019-12-30_07:00:00	2019-12-30 17:00:03	0	20.79	8.87	0.12	0	0	303.89	-5.57	-3.76	30.74	6.72031	55.979	13.9	26.3	3.5	41.4	63.7	865							0.0928793									25.3009	673.402			19.7136	154.008			10.3704	22.0929
2019-12-30_08:00:00	2019-12-30 18:00:03	0	25.3	10.7	0.14	0	0	302.13	-4.66	-3.97	28.98	6.12181	49.5714	13.9	26.2	3	53.3	56.6	1294							0.108359									10.24	581.774			7.7284	111.303			9.74567	12.973
2019-12-30_09:00:00	2019-12-30 19:00:03	0	27.26	12.02	0.2	0	0	299.82	-3.97	-4	26.67	5.63568	44.7844	15.7	25	3.4	61.2	62.3	1584							0.154799									13.5424	441			2.7889	49.5616			4.99827	12.36
2019-12-30_10:00:00	2019-12-30 20:00:03	0	26.08	12.26	0.25	0	0	298.72	-3.41	-4.32	25.57	5.50368	38.286	7.3	24.5	1.9	52.5	56.5	1236							0.193498									24.6016	850.306			1.1449	29.5936			12.9865	12.9865
2019-12-30_11:00:00	2019-12-30 21:00:03	0	22.57	10.91	0.22	0	0	298.02	-3.13	-4.32	24.87	5.33473	35.9248	19.8	23.7	1.6	39.8	56.6	615							0.170279									79.0321	324.36			1.3689	15.5236			13.9482	13.9482
2019-12-30_12:00:00	2019-12-30 22:00:03	0	21.73	11.75	0.32	0	0	297.32	-2.77	-3.91	24.17	4.79176	35.3154	24.5	23.1	1.7	44.8	51.1								0.247678									162.562	162.562			1.1449	6.9696			9.559	9.559
2019-12-30_13:00:00	2019-12-30 23:00:03	0	23.83	14.25	0.46	0	0	296.58	-2.83	-3.81	23.43	4.74605	36.6044	16.6	22.9	1.6	44.8	47.1	500							0.356037									5.5225	319.337			0.2809	2.89			9.89764	9.89764
2019-12-30_14:00:00	2019-12-31 00:00:03	0	26.24	17.06	0.62	0	0	295.73	-2.22	-3.65	22.58	4.27211	31.3089	19.5	22.6	1.4	49.4	41.5	427							0.479876									5.9536	147.866			0.0004	0.3025			8.249	8.249
2019-12-30_15:00:00	2019-12-31 01:00:03	0.01	30.33	21.88	0.9	0	0	295.09	-1.89	-3.56	21.94	4.0306	27.9639	15.9	22	1.4	46	45	416							0.696594									35.7604	119.684			0.0036	0.4761			6.92003	6.92003
2019-12-30_16:00:00	2019-12-31 02:00:03	0.01	30.37	23.13	0.99	0	0	294.3	-1.55	-3.09	21.15	3.45696	26.6393	20.8	21.5	0.8	38.1	52.4	339							0.766254									5.4289	22.9441			0.1225	3.9204			7.05946	7.05946
2019-12-30_17:00:00	2019-12-31 03:00:03	0.01	21.32	16.01	0.66	0	0	293.24	-0.79	-2.26	20.09	2.3941	19.2675	15.4	21.5	0.7	11.3	49	405							0.510836									0.3721	299.636			1.9881	9.2416			2.86996	5.88501
2019-12-30_18:00:00	2019-12-31 04:00:03	0.01	15.71	11.54	0.46	0	0	294.01	-1.04	-2.31	20.86	2.53332	24.2382	16.6	22	1.6	357.2	45.7	587							0.356037									25.6036	423.536			1.2996	3.1329			0.871082	1.92289
2019-12-30_19:00:00	2019-12-31 05:00:03	0	12.77	8.72	0.31	0	0.01	293.97	-1.59	-2.54	20.82	2.99661	32.046	35.9	22.8	2.1	351.8	62.8	384							0.239938									738.752	738.752			3.9204	3.9204			0.803918	0.803918
2019-12-30_20:00:00	2019-12-31 06:00:03	0	12.7	8.46	0.29	0	0.01	296.06	-1.47	-2.27	22.91	2.7044	32.9263	51.6	22.4	2.3	337.3	87.8	767							0.224458									1861.06	1861.06			0.2601	0.4624			0.163542	0.265839
2019-12-30_21:00:00	2019-12-31 07:00:03	0	13.91	9.44	0.34	0	0.01	300.02	-0.18	-2.5	26.87	2.50647	4.11827	57.4	23.6	2.3	348.3	106.5	1003							0.263158									2300.16	2300.16			10.6929	34.1056			0.0426305	0.509123
2019-12-30_22:00:00	2019-12-31 08:00:03	0	12.8	8.14	0.26	0	0.01	303.47	2.59	-2.41	30.32	3.53782	312.938	66.7	27.1	2.5	354.1	107	879							0.201238									3429.27	3429.27			10.3684	163.584			1.07708	1.07708
2019-12-30_23:00:00	2019-12-31 09:00:03	0	11.09	6.56	0.17	0	0.01	306	3.87	-2.43	32.85	4.56966	302.125	70.7	31.7	4	342.7	71.5	737							0.131579									4113.94	4113.94			1.3225	396.806			0.324513	9.30043
2019-12-31_00:00:00	2019-12-31 10:00:03	0.01	9.76	5.5	0.11	0	0.01	307.81	4.01	-2.45	34.66	4.69921	301.424	49.3	36.2	5.3	323.2	68.1	786							0.0851393									1918.44	1918.44			2.3716	688.013			0.360945	20.0633
2019-12-31_01:00:00	2019-12-31 11:00:03	0.02	10.18	5.99	0.14	0	0	309.1	3.12	-2.15	35.95	3.78905	304.571	13.7	37.8	4.6	332.1	98.8	1133							0.108359									59.4441	842.741			3.4225	847.974			0.65764	8.23145
2019-12-31_02:00:00	2019-12-31 12:00:03	0.03	12.05	7.58	0.21	0	0	309.44	1.26	-1.59	36.29	2.02872	321.605	14.3	39.5	4.3	335.2	92.5	1673							0.162539									45.1584	720.386			10.3041	970.946			5.15872	5.15872
2019-12-31_03:00:00	2019-12-31 13:00:03	0.05	14.76	9.49	0.29	0	0	309.33	-1.23	-0.8	36.18	1.46728	56.9599	16.7	33.8	3.7	54.9	124.3	1420							0.224458									51.9841	507.601			5.6644	642.623			4.98505	4.98505
2019-12-31_04:00:00	2019-12-31 14:00:03	0.07	17.47	11.18	0.36	0	0	309.41	-3.02	-1	36.26	3.18126	71.6791	38.6	30.7	3.9	49.1	83.1	1917							0.278638									751.856	751.856			30.9136	498.629			0.516591	2.43753
2019-12-31_05:00:00	2019-12-31 15:00:03	0.06	20.29	12.54	0.39	0	0	308.73	-4.46	-2.02	35.58	4.89612	65.6337	43	29.5	4.3	46	81.4	3185							0.301858									927.812	927.812			36.9664	418.203			0.35536	13.5139
2019-12-31_06:00:00	2019-12-31 16:00:03	0.01	22.03	11.81	0.27	0	0	307.2	-5.44	-3.11	34.05	6.26623	60.2439	38.3	29.9	3.9	51.8	85.7	3556							0.208978									701.72	701.72			17.2225	373.262			5.59907	21.5875
2019-12-31_07:00:00	2019-12-31 17:00:03	0.01	25.65	12.92	0.25	0	0	305.95	-4.84	-3.11	32.8	5.75306	57.2769	35.2	29.8	2.6	41.4	93.7	3166							0.193498									496.398	496.398			9	322.921			9.94179	9.94179
2019-12-31_08:00:00	2019-12-31 18:00:03	0.01	30.46	15.13	0.29	0	0	304.36	-3.94	-3.07	31.21	4.99485	52.0748	39.8	31.9	3.1	49.6	105.9	1734							0.224458									608.609	608.609			0.4761	341.51			3.59045	6.62984
2019-12-31_09:00:00	2019-12-31 19:00:03	0	32.37	17.02	0.39	0	0	302.03	-3.56	-3.33	28.88	4.87468	46.912	35.7	32.7	1.8	50	48.8	745							0.301858									348.942	348.942			14.5924	287.302			9.45365	9.45365
2019-12-31_10:00:00	2019-12-31 20:00:03	0	33.88	17.35	0.38	0	0	300.59	-3.11	-3.55	27.44	4.7196	41.2203	20.4	30	1.9	57.8	69.5	638							0.294118									9.3025	120.341			6.5536	164.096			7.95013	7.95013
2019-12-31_11:00:00	2019-12-31 21:00:03	0	30.09	15.05	0.29	0	0	299.92	-2.73	-4.02	26.77	4.85935	34.1807	16.6	23.4	4.6	193.6	118.7	571							0.224458									2.4025	291.385			11.3569	30.6916			0.0672634	15.5185
2019-12-31_12:00:00	2019-12-31 22:00:03	0	29.94	16.74	0.44	0	0	299.08	-2.2	-3.6	25.93	4.219	31.4297	22.4	21	5.7	191.8	60.6	1110							0.340557									32.0356	91.7764			24.3049	24.3049			2.19335	19.3512
2019-12-31_13:00:00	2019-12-31 23:00:03	0	40.55	28.05	1.13	0	0	297.67	-1.38	-2.83	24.52	3.14854	25.9955	18.2	20.9	4.7	196.5	45.4	889							0.874613									97.0225	97.0225			13.1044	13.1044			2.40703	5.4221
2019-12-31_14:00:00	2020-01-01 00:00:03	0	49.13	38.69	1.82	0	0	296.54	-1.31	-2.71	23.39	3.01002	25.799	13.4	21	4.5	198.8	47.4	911							1.40867									639.584	639.584			5.7121	5.7121			2.22005	3.96017
2019-12-31_15:00:00	2020-01-01 01:00:03	0	41.81	33.18	1.54	0	0.01	294.51	0.29	-1.06	21.36	1.09895	344.699	14.1	21.1	3.5	204.1	44.5	1154							1.19195									364.046	364.046			0.0676	4.7089			5.76502	5.76502
2019-12-31_16:00:00	2020-01-01 02:00:03	0.14	64.99	33.35	0.86	0.01	0.02	294.53	2.1	2.74	21.38	3.45219	217.467	11.1	20.9	2.3	216.3	46.1	1616							0.665635									495.062	495.062			0.2304	5.5225			1.32754	1.32754
2019-12-31_17:00:00	2020-01-01 03:00:03	0.56	97.54	34.84	0.11	0	0.01	294.15	2.22	5.28	21	5.72772	202.804	21.4	20.8	2.1	218.5	60.6	1386							0.0851393									180.634	180.634			0.04	8.0089			13.1604	13.1604
2019-12-31_18:00:00	2020-01-01 04:00:03	0.76	90.03	31.88	0.13	0	0	293.7	1.67	5.05	20.55	5.31897	198.299	19.7	20.5	1.7	214.2	70.2	852							0.100619									148.352	148.352			0.0025	12.8164			13.0969	13.0969
2019-12-31_19:00:00	2020-01-01 05:00:03	0.74	86.43	31.27	0.19	0	0	293.38	1.16	4.65	20.23	4.7925	194.007	35.2	20.4	1.3	218.2	67.5	706							0.147059									15.4449	315.063			0.0289	16			12.1976	12.1976
2019-12-31_20:00:00	2020-01-01 06:00:03	0.62	81.07	29.86	0.18	0	0	294.42	1.14	4.2	21.27	4.35197	195.186	38.1	20.4	1.2	201.2	70	697							0.139319									67.8976	370.178			0.7569	8.7616			9.93488	9.93488
2019-12-31_21:00:00	2020-01-01 07:00:03	0.49	75.53	28.29	0.16	0	0	295.4	1.16	2.97	22.25	3.18849	201.334	26.6	20.9	1.1	221.6	73.3	277							0.123839									2.8561	38.0689			1.8225	2.1904			4.36181	4.36181
2019-12-31_22:00:00	2020-01-01 08:00:03	0.42	68.71	26.92	0.19	0	0.01	296.58	0.82	2.63	23.43	2.75487	197.317	27	21.2	1.6	180.2	69.6	155							0.147059									0.0064	27.04			4.9729	4.9729			1.33372	1.35753
2019-12-31_23:00:00	2020-01-01 09:00:03	0.46	65.52	25.86	0.17	0	0.01	297.55	0.18	3.09	24.4	3.09524	183.334	24.4	21.2	2.2	139.9	67.2	151							0.131579									2.1316	2.3716			10.24	10.24			0.801452	0.801452
2020-01-01_00:00:00	2020-01-01 10:00:03	0.51	62.67	24.88	0.16	0	0.01	298.46	-1.27	2.42	25.31	2.733	152.31	18.5	21.7	3.7	143.1	61.3								0.123839									40.7044	40.7044			13.0321	13.0321			0.935085	0.935085
														24.8	21.8	4.4	145.2	62.8								0									1.37754e+06	2.29851e+06			24571.3	66418.9			3766.87	8309.95
														26.5	22.2	3.9	141.8	77.1
														30	21.9	4.1	139.3	80.2
														41.4	21.9	4.3	140.8	77.9
														31.7	22.2	4.1	145.3	73
														30.3	22.2	3.9	147.5	68.8
														16.7	22.2	2.7	171.4	74.2
														15.2	21.6	3.3	183.6	53.2
														14.3	21.4	3.6	186.7	40.6
														13.1	21.4	3.9	185.5	32.6
														20	21	3.5	186	39.8
														18.1	21.2	3.5	183.8	44
														12.4	21.2	3.3	189.6	31.6
														8.6	20.9	3	190.6	28
														16.6	20.5	2.9	188.5	26
														12.9	20.4	2.9	192.7	26.5
														17.5	20.2	2.7	193.6	28.6
														20.1	20	3	189.2	39.4
														32.1	20.1	2.5	190.9	57.9
														45.1	19.7	3.1	190.7	67.6
														45.1	19.4	3	187.9	75.2
														49.7	20.1	2.7	191.1	56.7
														43.7	21.5	3	187.4	54.3
														28.1	22.6	3.1	190.4	52.6
														20.6	23.6	3.1	191.8	44.7
														28.4	22.9	2.3	192.7	36.8
														20.8	22.6	2.2	190.9	31.5
														15.6	22.8	2.3	189.3	26.2
														10.6	22.8	3.2	181.7	33
														8.2	23.1	3.4	179.8	28.8
														8	23	3.4	185.3	33.1
														4.9	22	2.2	186	46.2
														7.5	21.7	1.9	187.4	39.6
														8.7	21.9	2.2	190.6	41.2
														4.9	22.2	2.1	189.1	43.8
														9	22.2	1.8	185.9	40.8
														8.3	22.1	0.9	206.3	36.6
														14	21.9	0.9	199.3	38.4
														13.2	21.6	1.6	178.7	30.3
														15.3	21.1	1.3	176.7	29.5
														13.6	20.3	1.1	170	11.1
														10.4	20.4	0.7	139.2	33.9
														9	20.9	1	175.1	36.3
														11	21.1	1.5	154.1	48.5
														10.7	21.1	1.1	182	43.8
														11.6	22.1	1.5	161.1	31.5
														11.3	23.1	2.6	153	31.8
														18.9	23.3	3.2	146.7	28
														19.4	23.6	3.1	149.8	25.3
														15.1	24	3.4	147	23.4
														7	25.1	4.2	123.5	18
														8.2	26.1	4.1	101.2	0.8
														16.8	26.5	4.5	90	28.2
														13.4	26.1	4.4	85.5	33.2
														8.5	25.4	4.1	81	22.3
														8.6	25	3.4	63.9	35
														15.8	24.9	3.5	65.9	38.8
														9.2	24.2	2.8	58.1	39
														6.1	23.9	1.8	47.4	28.2
														8.1	23.9	2	59.5	32.4
														6.9	23.2	1.8	62	30.8
														10.8	22.7	1.9	72	28.1
														11.6	22	1.4	58.9	26.4
														12.1	21.4	0.5	174.4	44
														11.4	20.9	0.4	160.1	61.4
														17	20.8	1	149.4	55.9
														15.7	20.4	0.6	162.1	35.1
														21.9	20.8	0.2	196.3	51.5
														21.4	23.3	0.9	343.8	71.6
														30.5	26.2	1.8	354.9	78.6
														50.4	29.5	3.2	334	69.1
														47.3	34.3	4.1	333	66.3
														65.1	38.7	5.9	318.6	74.4
														63.5	41.2	5.5	326.1	85.5
														38.9	42.2	4	335.1	93
														28.1	37.3	3.7	49.9	92.6
														42.2	33	4.8	42.4	95.1
														51.8	32.9	4.3	48.6	95
														46.4	32.4	3.5	48.8	86.7
														40.1	30.6	2.7	50	104.9
														38.2	30.9	2.5	56.6	90.9
														25.9	32.9	1.7	68.4	66.6
														22	32.1	0.9	17.5	74.1
														16.8	30.3	0.5	347.4	67.4
														29.9	28.9	0.6	318.8	66.2
														38.4	24.5	5	183.8	150
														80.1	23.5	5	193.3	170.3
														120.7	23.1	5.1	199	176.3
														128	22.6	4.4	198	137.3
														88.5	22.3	3.8	199.9	55
														52	22.4	3.1	206.5	50.9
														19.8	22.3	3	208.3	60.1
														13	22.6	2.9	205.4	62.2
														12	22.9	3.2	197.8	74.6
														16.9	22.9	3.4	195.9	71.2
														25	23	3.4	192.9	61.1
														21.6	23.4	4.1	189.2	60.7
														22.6	23.8	3.1	190.2	78.5
														31.1	23.8	4.1	182.8	79
														39	23.8	4.4	182.6	75.8
														36.3	24	3.5	183.5	81.2
														36.1	23.4	3.6	191.2	76.3
														30.9	22.7	3.2	183.8	75.5
														28.2	22.2	3.4	182.9	71.4
														28.8	21.8	3.5	171.2	67.5
														31.1	20.6	3.6	166.5	62.1
														21.9	20.1	3.7	166.1	42.1
														13.2	20.8	4.1	158.3	39.6
														23	21.3	4.6	148	58.6
														18	21.1	2.5	153.1	82
														30.2	20.8	1.6	161.1	72.7
														25.8	20.1	0.5	214.8	61.1
														20.6	20.2	1.4	162.5	76.4
														19.1	20.5	1.8	148.9	79.3
														23.1	20.5	1.1	176.8	64.3
														21.8	20.7	1.3	184.9	45.1
														17.3	20.5	1.5	157.1	69.8
														12.8	21.2	1.7	150.1	62.1
														10.6	21.8	1.5	172.8	51.3
														27.1	21.8	1.6	170	79
														23.6	21.8	1.5	167.1	58.3
														20.5	22	1.7	169	66
														19.9	21.9	3.3	145.7	58.5
														17.1	22.4	3.8	139.9	51.8
														17.3	22	4.1	141.7	42.1
														14.1	21.8	4	144.7	38.3
														13.6	21.6	3.9	139.9	24.5
														9.1	21.5	2.7	151.9	28.2
														9.1	21.5	2	159.8	27.2
														5.8	21.3	1.7	173.4	27.8
														0	21.2	2	153.5	24.8
														2.2	21.3	1.6	183.7	23.5
														6.8	21.4	1.4	160.4	33.1
														11.8	21.6	0.8	117.4	35.9
														14.9	21.8	0.4	302.5	39.6
														9.9	21.8	0.3	278.4	30.9
														11.1	21.6	0.4	128.6	45
														15.4	21.6	0.6	157.8	73.1
														21.3	21.2	1.7	146.2	71.2
														14.5	21.2	1	181.7	51.3
														15.3	21.8	1.3	199.7	67.7
														15.1	22.7	0.8	238	30.8
														13.5	24.4	1.4	145.9	40
														21.2	25	1.9	65.8	41.9
														25.8	23.6	2.3	45.2	43.3
														21.1	24.5	0.9	32.3	42.8
														18	26.7	0.2	119.5	47.3
														26.3	27.2	2.2	99.2	60.2
														25.9	27.8	2.8	99	53.6
														31.7	26.1	3.5	85	57.8
														28.5	25.8	3.6	62.4	54
														27.6	25.7	3.5	58.6	57.9
														23.5	25.1	3.2	55.5	50.1
														23.5	24.9	2.8	51.5	53.1
														22.9	24.9	2.1	45.6	48.7
														24.4	25.8	2.6	8.5	33.4
														20.9	25.9	2.4	15.4	35.1
														21.3	25.4	1.6	21.8	41
														16.3	24.3	0.8	177.2	65.2
														18.4	23.4	0.7	164	85
														27.4	23.8	0.8	216.1	62.3
														20.9	24	1.2	201.9	41.5
														24.7	24.1	0.8	233.7	38
														36.3	23.4	1.7	182.1	66.7
														56.6	22.5	2.2	177.8	126.5
														80.8	22.4	2.7	185.1	143.7
														106.7	22.9	2.6	184.6	180.5
														126.3	23.4	3.6	177.9	198.1
														136.6	24.1	3.9	175.4	195.4
														135.5	24.4	3.9	178.7	186.5
														134.3	24.4	3.8	176.6	183.7
														132.2	24.4	4.2	179.9	158.3
														115.1	24.3	4.2	181.1	138.6
														108	23.9	3.5	179	133.9
														101.7	23	3.1	188.2	111.9
														78.4	22.4	3	189.7	114
														80.8	22	1.9	201.9	118.2
														84.4	21.7	2.3	184.6	99
														54.3	21.7	2.3	187.3	96.7
														65.3	21.6	2.9	194.6	95.5
														74.1	21.2	3.4	189.1	78.9
														69	20.9	2.6	193.5	69.8
														65.1	21.2	2.5	188.9	91.1
														74.9	21.3	2.7	189	90.3
														70.3	21.3	2.6	187.7	86.8
														55.9	21.3	2.6	188.1	79.8
														59.3	21.2	2.7	190.6	66.4
														60.5	21.3	2.3	196.7	54.1
														32.9	21.6	2.5	191.2	40.7
														20	21.4	2.8	187.4	24.2
														7.6	21.6	2.9	189.7	5
														2.3	21.7	2.7	193.1	10
														2.4	22.4	2.9	190.9	12.2
														6.4	22	2.9	190.5	8.5
														6.2	23	3.2	187.5	-1.8
														6.7	24.3	2.9	188.6	9.6
														5	24	3	185	14
														6.3	23	2.7	190	19.9
														7.1	22.5	2.4	186.8	7.2
														2.4	22.3	1.8	187.5	13.4
														0.1	22.4	1.7	183.4	20.2
														10.8	22.3	1.8	181.4	20.3
														4.5	22.1	1.6	181.1	13.3
														8	21.9	1.5	184.6	20.3
														7.8	21.7	1.1	189.6	16.1
														-1.9	21.7	1.1	181.6	17.9
														9.3	21.6	0.6	173.5	15.2
														13.3	21.8	1.2	182.7	36.1
														6.5	21.8	1.1	186.8	21.3
														0.1	21.7	0.9	182.8	20.5
														9.8	21.8	0.8	180.9	24.6
														7.3	22	1	172	36.1
														4.8	22.6	1	156	39.8
														1.9	24	1.6	140.3	26.2
														13.7	25.3	1.1	104.8	24.2
														18.5	26.5	1.7	61.9	25.5
														16.6	27.1	2.7	104.2	40.4
															27.4	3.6	88.4
															27.9
														20.5	28.6	4.7	59.4	38.9
														25.1	29	4.3	59.8	51
														25	28.7	4.7	59.3	46.7
														19	29.2	4.7	61.7	57.9
														24.2	28.7	3.1	59.7	58.1
														21.2	28	3.3	57.9	59.8
														21.8	27.2	2.4	46.3	60.3
														18	26.6	1.5	60.3	58
														19.1	26.6	1.5	48.7	61.2
														23.3	26.8	0.9	4.8	65.1
														19.2	26.3	1.4	7.4	69.5
														18.6	26.3	1.3	1.6	65.4
														25.6	26.7	1.4	331.9	60.6
														26.9	24.7	3.7	188.3	69.6
														31.3	21.8	5.9	184.4	76.3
														35	21.5	4.6	194.5	73.9
														25.4	21.8	4.3	197.4	60.4
														22.1	20.7	4	201.6	25.9
														15	20.5	3.3	197.6	20.3
														5.7	20.4	3.4	197.2	23.5
														9.7	19.5	3.1	198.9	25.4
														8.3	18.9	3.7	194.9	25.5
														20.5	19.2	3.9	188.3	27.9
														26.2	19.8	3.7	186.6	36.6
														28.8	20.6	3	184.6	47.6
														21.2	20.8	3.1	188.6	43.6
														11.9	20.9	3	189.1	39.9
														11.4	21	2.5	188.4	41.9
														12.4	21	2.2	186.1	44.6
														18.3	20.5	3.6	151.7	58.3
														18.7	20.2	2.1	149.4	50.7
														16.1	20.9	2.2	158.6	59.7
														19.2	20.9	2.5	156.4	70
														28	20.7	2.3	152.2	68.3
														26.9	20.7	3.5	146.3	48.3
														14.2	20.5	4.1	146.4	46.9
														22.8	20.2	3.1	149.3	54.8
														25.1	20.1	3.4	151.2	57.1
														29.9	20	2.7	158.1	78.2
														37.1	20	3.4	159.8	87.2
														39.7	20	3.8	156.2	52.5
														22.6	20.6	3.9	146.9	56.5
														16.6	21.3	3.9	137.4	49.7
														19.2	21.8	4	140	49.3
														16.1	22.4	4.5	146.6	46.4
														17.7	22.7	4.7	145.4	54.8
														22.8	23.1	4.3	142.2	52.6
														22.5	22.9	4.6	134.8	48.9
														24.5	23	3.8	132.3	50.4
														25.4	22.8	3.9	121.2	65.8
														36.8	22.6	4	132.7	76.7
														33.7	21.8	4.6	143.3	58.4
														21.3	21.5	4.2	142.1	43.1
														17.6	20.8	3.8	136.7	47.5
														22.4	21.2	3.8	134.8	43.4
														26.6	21.3	4	125.3	42.1
														28.2	21.1	3.6	127.2	41.9
														20.2	21.1	3.6	117.9	38.6
														16.5	20.9	2.8	112	34.3
														28.6	20.7	2.5	112.1	44.3
														25.7	20.6	2.2	124.5	43.9
														19.9	20.7	2.9	137.4	30.7
														17.9	20.4	1.7	133.7	31.3
														13.1	20.5	2.5	128.5	22.8
														6.4	20.2	2.1	142.6	29.9
														0.3	21.3	1.9	145.1	30.1
														10.6	22.1	2.5	141	21
														10.7	22.8	2.5	142.3	24.4
														5.7	23.1	3.4	124.2	36.3
														9.1	23.2	4	117.8	29.2
														10	23.2	4.4	120.8	15.6
														4.4	23.8	4.4	122.4	20.4
														4.4	23.7	4.9	132.1	23.6
														7.1	23.8	5.1	116.5	24.4
														6.4	23.9	4.3	108.7	21.2
														5	23.2	4	107.9	20.4
														-2.5	22.8	3.8	112.4	26.4
														5.5	22.1	3.5	119.6	25.1
														-1	21.8	2.5	115.4	25.6
														-1.8	21.8	2.3	112.6	29.8
														4.5	21.8	1.9	105.8	33.4
														4.8	21.8	1.6	91.8	28.1
														6.8	22	1.4	100	20
														0.6	21.6	1.5	125.5	27.9
														8.8	21.3	0.9	130.8	26.7
														7.3	20.8	0.4	124.6	24.8
														3.3	19.9	0.4	214.1	21.3
														11	19.4	0.3	210.1	66.8
														16.3	19.5	0.2	266.7	55.8
														3.3	22	1.1	158.7	53.9
														11.9	23.2	1.6	150.2	66.5
														16.5	23.9	2.1	153.6	41.5
														11.4	24.1	2.9	139.3	28.8
														12.1	24.9	3.6	111.7	18.2
														8.5	25.1	5	108.9	14.2
														3.3	25.6	4.8	105.8	21.2
														-0.5	25.6	4.2	103.1	42.6
														3.5	25	5.2	126.9	16.9
														6.3	25	4.4	114.5	15.5
														3.5	24.5	4.5	122.6	16.5
														6	23.8	4.5	123.8	15.3
														4	23.2	3.8	120.7	13.5
														1	22.8	3.2	118.4	11.8
														10.6	22.6	3.1	123.6	10.1
														9.7	22.5	2.9	136	15.6
														5.4	22.3	2.6	139.6	20.4
														4.7	22.2	3	135.2	13.3
														6.9	22.2	2.7	130.6	8.2
														4.7	21.7	1.5	151.6	21.5
														2.4	20.7	0.7	193.8	24.3
														4.8	20.6	0.9	183.5	23.2
														-3.4	20.8	1.4	183.5	27.5
														-1.5	21.2	1.2	186.8	31.7
														3.7	22.1	1.9	179.6	41.1
														5.9	23.2	2	172.3	40.9
														4.8	23.8	2.9	161.1	18.7
														12.1	23.8	3.2	150.4	18.1
														10.3	24	3.6	145.5	22.2
														10.5	23.8	3.9	144.9	20.1
														10.7	24	3.5	144.8	35.6
														11.6	24.6	3.2	150.5	21
														6.3	24.8	2.7	157.3	18.2
														2	25.5	2.8	155.8	20.2
														6.3	25.3	3.5	94.1	19
														6.9	25.3	3.3	77.7	31.5
														10.1	25	3.4	59.5	31.1
														0.2	24.9	2.3	55.8	24.3
														-5.8	24.4	2.5	55.3	22.8
														3	24	2.5	53.4	22.6
														4.8	23.8	1.1	40.2	24.5
														5.1	23.7	0.7	68.3	19.5
														7	23.3	0.7	50.9	17.3
														4.9	23.4	1.2	47.7	13
														2.7	23.1	1.4	36.1	15.5
														4.4	22.8	1.2	2.4	13.7
														16.7	22.4	0.5	349.9	10.6
														20.3	22.5	1	349.6	13.3
														5.2	23.5	1.1	329.6	17.4
														6.9	25.2	1.1	287	14.9
														3.3	26.4	1.7	157.6	27.4
														6.8	26	2.9	154.5	34.7
														14.5	26.7	2.8	160.2	33.4
														22.9	26.1	3.6	149.2	31.3
														32.7	24.2	1.5	325.1	54.9
														24.7	22.4	2.5	338.8	32
														9	22.5	2.6	8.9	17.6
														10.9	23	2.8	326.3	19.8
														8.6	24.5	3.5	336.3	16.3
														12.9	24.7	2.5	346.6	20.2
														10.5	24.7	1.8	343.3	11.1
														10	24.3	1.7	340.6	14.6
														8.9	24.1	0.5	36.5	24.7
														6.1	22.9	0.9	152.8	31
														10.5	22.4	0.9	160.8	35.8
														9.6	21.9	1.4	174.9	42.7
														14.6	21.8	2	166.1	40.4
														22	21.7	2.2	176.2	36.7
														25.5	21.7	2.2	185.3	40.3
														30.2	21.7	1.8	190.5	68.7
														37.1	21.6	1.6	195.1	83.9
														51.6	21.9	1.1	123	77.7
														35.8	22.5	1.6	198.5	45.3
														24.5	23.1	1.7	198.1	47.8
														25.1	24.2	1.4	195.5	42.4
														25.1	24.1	3.1	164.3	29.4
														19.5	23.8	3	169.2	23.4
														18.1	22.6	2.8	201.2	14.8
														14.3	22.9	2.2	212.6	21.1
														9.8	22.3	2.8	201	26.7
														19.3	21.4	3.4	199.6	43.5
														28.8	22.3	3.4	183.6	46.5
														27.9	22.5	3.1	180.1	32.8
														20.5	22.5	2.7	183.6	37.6
														18.8	22.3	2.4	185.8	38.3
														17.6	21.8	2	202.8	41.4
														19.9	21.5	2.3	208.6	37.6
														20.6	21.1	2.2	211	33.2
														18.1	21.1	2	212.2	28.9
														14.2	21.1	1.8	219.5	27.2
														12.9	21	1.4	229.1	21.8
														13.2	20.8	1.1	239.1	17.7
														18.9	20.4	0.8	289.7	21.7
														14.6	20.3	0.6	285.7	18.9
														12.4	20.3	0.5	274.7	22.1
														15.6	20.4	0.7	275.5	21.3
														9.8	20.5	1.5	218.1	14.7
														3.9	21.1	1.7	206.4	8.5
														2.5	22	2.1	208.3	10.2
														6.2	22.4	1.9	218.1	8
														12.6	22.6	1.9	200	20.1
														6.1	23	2.1	207	12.6
														12.6	22.9	2.5	200	11.6
														10.5	22.5	3.2	194.4	21.4
														11.9	21.7	3.1	188	27.2
														13.2	21.1	3.2	188.6	31.7
														20.7	21.4	3.3	189.2	32.3
														13.2	21.2	3.6	186	29.1
														8	21	3.6	186.6	26.5
														13.7	20.5	3	191.3	24.1
														16	20.2	2.4	191.5	27.3
														12.7	19.9	2.1	192.1	21.9
														14.2	19.7	1.8	197.5	18.6
														11.8	19.7	1.7	195	22.2
														8.9	19.7	1.2	209.2	19.2
														4.4	19.7	1.3	207	22.6
														4.9	19.8	1.3	205.4	16.7
														8.4	19.8	1.2	212.4	20.7
														7.2	19.8	1.1	209.9	15.1
														2.9	20	1.1	207.3	20
														10.7	20.4	1.2	213	24.7
														5.5	21.5	1.6	189.1	24.7
														8.3	22.8	2.5	189.4	30.1
														11.9	23.6	2.4	181.5	29.7
														9.9	23.9	2.9	176.8	22.5
														14	24.1	3.3	177.1	25.5
														7.4	24	3.7	179.3	25.9
														7.5	24.2	3.6	178.4	21.7
														8.1	24.2	3.2	168.9	19.4
														6.4	24	2.8	185.5	19.2
														5.2	23.8	2.6	189.2	16
														-0.6	24.1	2.3	191.3	10.7
														4.3	23.5	1.7	193.3	13.6
														2.2	23.2	0.9	210	13.3
														12.7	22.7	0.3	285	6.7
														9.9	22.3	0.3	247.8	6.1
														5.5	21.8	0.3	208	6.9
														3.4	21.5	0.7	197.6	8.3
														-3.4	21.6	1.1	196.9	11.7
														4.2	21.6	0.5	245.1	9.6
														2.8	21.5	0.6	340.3	6.5
														9.7	21	1	325.3	13.7
														-6.3	20.6	1.4	332.3	14.5
														-4.4	20.5	1.2	323.5	18.8
														3.5	21.4	1.8	336.3	21.8
														-0.3	23.6	1.8	354.5	22.6
														3.4	26.1	1.1	22.2	18.6
														9.2	26.5	2.2	96.8	15.5
														7.3	25.8	3.5	119.9	17.3
														2.7	26.3	3.6	115.9	15.3
														5	25.7	3.6	100	12.3
														5.1	26.6	2.7	71.9	19
														7.4	27.4	2.4	37.6	17.2
														7.3	29.3	3.8	57.4	25.3
														13.8	29.3	3.6	54.4	51.8
														14.7	28	2.7	35.1	59.9
														9.4	27.3	2.6	17.9	30
														8.8	27.6	1.9	334.4	21.3
														13.3	24.6	3	185.8	41.8
														20.2	23.6	1.4	214.6	35.7
														19.2	23	0.5	306.7	28.4
														10.2	22.3	0.9	331.6	24
														9.9	21.6	0.7	305.3	24.1
														13.8	20.7	0.7	306.7	22
														9.8	20.4	0.6	315.8	25.5
														13.3	20.7	0.8	331.2	27.4
														8.8	20.2	1.2	318.4	38.3
														17.3	20	1.7	322.5	48.6
														15.6	21.7	1.3	303.8	51.7
														16.9	25.9	3.1	314.2	70.7
														24.1	27.9	3.9	326.2	86
														18.5	29.3	4	324.2	54.9
														15	30.7	5.2	324.8	43.2
														8.1	31.9	4.4	315.2	42.2
														4.7	32.8	4.1	320.6	47.4
														5.2	28.7	4.2	156.7	115
														10	27.9	3.8	156.4	59.9
														15.3	27.3	4.3	153.5	48.9
														19.2	26.5	4.4	144.9	29.1
														14.9	25.8	4	130	32
														2.2	25.1	3.7	110.2	25.1
														-9.7	24.7	2.4	91.5	30
														-3.3	24.4	2	62.7	26.3
														-1.2	24.2	1.5	61.8	24.5
														1.6	24.2	2	72	29.3
														1.2	24.3	2.1	73.8	27.5
														3.9	24.2	1.7	91.1	33.5
														6.2	23.9	1.8	105.9	27.6
														7.6	23.8	1.6	111.1	33.6
														3.5	23.6	1.1	118.7	39.4
														7.8	23.6	1.2	119.7	38.7
														16.8	23.3	0.8	152.1	43.2
														6.2	24.3	1.2	145.2	57
														10.5	25.5	1.9	142.5	59.3
														11.5	26.2	2.4	151.7	43.6
														8.6	26.9	2.6	132.8	62.8
														14.5	27.6	3.2	111.5	52.7
														13.7	28	3.7	100.4	52.5
														10.7	28.3	4.2	100.2	53.6
														11.7	28.4	4.8	103	54.8
														12.3	28.9	4.7	93.4	55.3
														13.2	28.8	4.6	82.7	60.1
														12.2	27.7	4.2	74.5	58.8
														12.2	27.7	3.4	63.3	32.8
														23.9	28.1	2.7	47.8	58.3
														6.3	27.4	2.3	41.2	53.1
														11.8	27	2.1	31.5	42.6
														19.4	26.3	1.6	24.6	23.5
														17.5	26.3	1.8	80.4	22
														13	25.9	1.5	27.3	41.5
														8.1	25.2	1	355.2	40.1
														7.8	24.2	0.9	346.3	40.8
														9.5	24.2	1.7	339.2	40.4
														9.4	23.3	1.7	330.4	29.6
														11	23	1.7	337.6	34.5
														12.5	22.9	2.4	332.7	37.4
														11.8	25.4	2.2	320.9	48
														10.7	30.1	2.6	337	62.1
														17.6	30.6	2.2	50.3	111.7
														12	34.2	3	357.4	35.8
														11.4	37.9	5.2	332.7	35.6
														22.2	39.7	7.4	327.8	44.9
														27.4	40.3	7.3	321.3	44.9
														21.8	41	7.4	320.9	61.7
														18.4	41.8	6.9	321.6	54.1
														14	41.3	5.1	329.6	55.5
														10.9	37.5	3	18.9	84.9
														17.4	37.5	3.4	11.5	81.5
														19.6	35.9	3.5	23	56.8
														17.7	34.3	3.9	5.9	55.9
														5.2	32.7	3.6	0.3	46.2
														2.4	32.3	3.4	317.7	61.6
														6.9	30.8	5.2	316.5	38.8
														3.4	30.4	4.9	317	30.7
														-2.1	30	4.6	316.2	27.2
														0.4	29.4	5.1	325.1	27.4
														5.1	29.3	3.6	327.7	34.2
														4.9	29.2	2.4	317.9	30.9
														-0.6	29.9	2.9	317	31.6
														7	29.3	1.4	285.1	32.8
														16.5	27.3	3	192.9	105.1
														49.8	26.8	3.2	192.7	205.5
														90.4	27.4	3.3	183.1	123.7
														67.3	27.2	3.7	179.7	144.5
														61.6	26.5	4.3	182.7	134.6
														53.7	26.3	4	186.8	128.9
														48.5	26.3	3.6	188.6	88.6
														38.9	25.4	3.2	181.1	82.9
														36.6	25	2.7	181	98.8
														23.1	25.7	2.8	179.3	75.4
														32.6	25.4	2.3	172.4	72.7
														28.8	25.8	3.2	104.3	78.3
														36.9	25.4	2.4	89.6	75
														33.4	25	2.8	119.1	66.2
														35.4	24.9	2.4	124.3	71.1
														31.3	24.9	2	126.1	61.2
														24.7	24.8	2.4	141.2	77.6
														23	24.7	2.6	148	67.9
														22.6	24.6	1.7	156.5	69.4
														19.3	24.5	1.2	179	73.4
														26.1	24.4	1.4	169.7	65.3
														20.7	24.4	2.4	150.4	60.6
														25.5	24.3	2.6	149.5	66.1
														18.1	24	2.9	151.7	65.8
														16.8	23.2	2.4	150.8	51.4
														14.8	23.1	2.2	140.5	47.7
														17.4	23.3	1.3	163.3	51.4
														10.9	23.7	0.8	169.5	47.4
														10.8	24.6	1.5	136.1	52.3
														18.5	25.7	2.4	132.7	57
														15.2	25.9	2.6	143.5	58.7
														13.9	26.3	4	123	60.4
														15.5	26.3	4.4	126.2	27
														13	26.2	3.8	125.3	19.9
														10.7	25.9	3.1	105.5	27.6
														7.9	26.1	2	92.6	23.6
														11.2	25.4	1.1	137.4	33.5
														8.6	25.1	1.2	172.4	39.6
														18.6	24.8	1.7	168.1	37.4
														21.2	24.4	2.3	123.4	15
														16.2	24.3	2.2	56.2	17.8
														10.2	24.2	0.7	329.2	28.6
														3.5	24.6	0.8	43.6	24.6
														8.2	24.6	0.9	102.3	17
														7.5	24.3	0.6	81.6	21.8
														9.8	24.4	1.1	59.2	23.7
														6.5	24.2	0.9	317.7	26.5
														5.4	23.7	0.3	274.8	32.8
														7.2	25.3	0.5	301.8	27.4
														7.5	26.8	0.2	290	25
														17.7	28.8	1.4	345	15.7
														12.4	30.9	1.9	357.2	21.4
														11.8	31.4	2.5	55.7	32.4
														18.4	30.8	2.9	93.4	29.4
														18.6	29.4	4.7	105.7	27.6
														16.9	29.9	4.6	81.6	24.1
														17.2	28.2	4.1	65	23.9
														14.8	27.9	3.3	68.1	25.2
														4.8	28	3.3	358.2	29
														4.1	25.4	3.3	342.1	21.5
														10.4	24.4	2.8	346.9	8.5
														7.7	25.2	1.7	4.7	26.2
														-7.6	25.2	0.9	319.3	5.5
															25.3	1	328.5	6.1
														-0.5	25.3	2.1	51.6	31.9
														4	24.2	1.5	12.4	24.9
														7.7	24.1	1.1	325.9	13.7
														5.9	23.5	0.3	286	6.8
														9.7	23	0.6	230.1	12.8
														7.8	23.6	1.5	199.1	82.9
														17.1	23.7	1.4	195.3	82.3
														25	23.7	1.6	193.5	70.3
														28.4	24.3	1.7	192.3	70.9
														29.6	25.5	2.2	186	73.8
														30.6	25.8	2.8	177	76.4
														32.5	26.3	2.9	178.8	65.7
														32.4	26.2	3.6	176.3	52.3
														27.5	26	3.1	176.3	50.8
														19.5	26	3.1	168	54.8
														13.6	25.9	3.7	156.5	45.9
														23.4	25.9	3.7	142.5	41.9
														16.6	26.2	3.5	112	30.3
														19	26.8	3.3	69.9	8.3
														13.9	26.8	2.7	73.8	32.3
														4.2	26.6	3.1	66.9	28.4
														1.5	25.9	2.4	55.2	34.2
														1.2	25.9	1.9	48.7	10.9
														4.1	25.4	1.7	46.5	23.3
														4	25	1.5	53.3	26.2
														4	24.7	1.4	46.5	21.6
														6.3	24.4	1	31.8	16.7
														7.6	24	1	25.5	17.5
														6.3	23.7	0.6	12.1	21
														6.7	22.7	0.6	171.2	21.6
														-1.9	22.4	0.3	181.5	35.6
														-1.9	22.1	0.2	200.3	32.5
														-3.9	24.8	0.4	143.8	23
														7.5	26.6	0.2	3.7	19.2
														8.8	27.1	1.2	101.1	45
														13.1	27.8	1.7	122.2	44.5
														9.9	27	3	141.7	32.7
														16	27.4	2.8	118.5	34.4
														22.8	28	2.9	87	23.4
														12.9	29	3	61.9	29.6
														9.6	30.1	4.2	62.4	35.4
														17	29.6	4	60.6	36.4
														18.1	28.4	3.3	56.5	46.7
														11.3	27.6	1.4	88.9	46.6
														4.4	25.9	2.5	169.5	53.5
														2.6	25.1	3.4	357.9	25.3
														-6.5	25.4	0.9	169	25.4
														4	24.8	1.7	209	30.1
														8	24.2	2.8	198.9	30.6
														9	24.2	2.4	199	29.7
														3	24.2	2.1	198.3	28.5
														5.7	24.4	2.7	195.2	31
														13.5	24.1	2.8	200.7	30.3
														11.6	24.2	2.6	201.6	33.8
														11.8	24	2.6	197.2	33.8
														12.2	24	2.3	203.7	36.4
														11.2	24	2.1	206.6	37.7
														14.5	23.4	2.2	203.7	26.4
														10.1	24.1	2.4	195.4	27.6
														10	25	2.7	192.1	32.7
														23.5	24.5	3	191.6	24.3
														24.7	24.7	2.7	192.5	42.3
														11.8	26.2	2.8	188.6	41.8
														14.1	25.8	3.1	177.9	49
														20.5	25.9	3.5	154.8	37.7
														20.5	25.7	4.1	147.5	33.4
														17.9	25.4	4	142.3	30.7
														17.7	24.7	3.5	142.2	38.8
														16.3	24.4	3.2	139.7	34
														18.8	24.2	2.7	138.1	35
														21.8	24	2.3	127.4	29.1
														26.4	23.8	2.3	134.6	37.2
														22.4	23.6	1.9	139.7	33.3
														14.8	23.4	1.4	142.7	36
														19.2	23	0.8	164.1	33.6
														16.9	22.4	0.7	183.8	29.9
														16.5	21.7	0.5	229.3	25.7
														18.4	21.3	0.6	214.1	29.7
														10.9	21.1	0.6	289.2	31.5
														8.4	20.7	0.6	298.3	30.4
														8.7	22	0.5	229.1	39.6
														10.6	24.2	1.5	181.1	23
														18.8	25.1	1.8	153.5	26.8
														20.9	25.6	2.5	150.2	32.1
														15	25.7	2.9	153.3	27
														10.6	25.8	3.7	147.1	25.7
														20.3	26	3.6	144	37.3
														19.5	26.4	3.5	135.9	46
														15.5	26.9	3.8	103.2	27.9
														17.8	26.5	4.6	105.2	35
														16.4	26.6	3.9	86.9	33
														16.6	26.1	3.4	74.8	29.3
														11	25.5	2.8	78.1	24.4
														3.9	25.1	2.3	83.3	21.6
														15.4	24.9	2.4	69.5	12.3
														15.5	24.7	2	60.3	6.2
														4.7	24.5	1.9	59.7	6.3
														3.1	24.4	1.3	62.4	4.8
														1.2	24.1	0.9	92.3	9.2
														9.4	24	1.3	73.7	12.4
														6.4	23.9	1.2	91.3	9.5
														0	23.9	1.8	49.7	13.6
														9.3	23.6	1.1	28.4	15.3
														12.7	23.5	1.2	16.2	21.4
														5.9	24.1	1.7	360	18.2
														7.3	24.9	2.6	350.4	23.7
														8.3	25.9	2.9	337.4	20.6
														9.8	27.3	2.4	346.9	27.8
														12.8	28.7	2.5	68.4	22
														10.7	29.6	3	59.5	21.3
														14.9	30.9	3.1	62.7	28.1
														20.7	31.7	3.7	65.9	26.3
														18.4	30.6	5	61.1	35.5
														12.4	30.4	4.3	66.3	51.2
														7.9	29.6	4.5	64.3	54.2
														12.1	28.6	4.6	62.5	55.6
														11.8	27.7	3.6	53.7	38.4
														4.6	27.2	3	51	31.2
														3.6	26.7	2.2	45.9	32
														7.7	26.2	1.8	41.4	32.6
														8.8	25.8	2	46	26.4
														6.1	25.3	1.9	47.2	23.9
