# Supplementary material for: Black Carbon Emission, Transport and Effect on Radiation Forcing Modelling During the Summer 2019–2020 Wildfires in Southeast Australia
Source: Preprints.org preprint supplement (doi:10.20944/preprints202302.0293.v1), 2023-02-17
Supplement: Supplementary file 2 [file dec2019_1001.xlsx]

## Sheet: dec2019_1001
Date_time	Datetime (AEST)	dust_1	PM10	PM2.5	BC	NO2	NO	Temp2m	U	V	Temp2m(C)	Wsp(pred)	Wdr(pred)	PM2.5 (obs)	Temperature(obs)	Wsp(obs)	Wdr(obs)	PM10 (obs)	BC_obs (nanograms/m3)		Date	PM2.5_avg	PM2.5_avg_obs	BC_avg	BC_avg_obs(nanograms/m3)	BC_avg_obs (micrograms/m3)	BC_avg_obs(nanograms/m3)
2019-12-01_00:00:00	2019-12-01 10:00:00	0	0	0	0	0	0	293.2	4.61	-3.42	20.05	5.74008	306.57	6.1	17.7	4.5	300.4	23.5	126		2019-12-01	0.015	12.5643	0.00142857	220	0.24875	248.75
2019-12-01_01:00:00	2019-12-01 11:00:00	0	0	0	0	0	0	293.75	8.17	-5.86	20.6	10.0543	305.65	6.1	17.4	3.8	289.3	14.1	114		2019-12-02	6.01958	14.6333	0.000833333	267.167	0.307348	307.348
2019-12-01_02:00:00	2019-12-01 12:00:00	0	0	0	0	0	0	294.91	9.18	-5.22	21.76	10.5603	299.624	13.3	19.5	4.9	292.2	40.5	130		2019-12-03	7.05292	12.5125	0.0204167	337.958	0.2615	261.5
2019-12-01_03:00:00	2019-12-01 13:00:00	0	0	0	0	0	0	295.62	10.8	-5.49	22.47	12.1153	296.946	18.6	20.9	5.4	296.7	76.8	123		2019-12-04	4.31583	3.24167	0.00541667	200.667	0.279042	279.042
2019-12-01_04:00:00	2019-12-01 14:00:00	0	0	0	0	0	0	295.12	11.29	-5.06	21.97	12.3721	294.141	20.3	21.6	6	294.1	85.9	118		2019-12-05	2.78708	3.90833	0.0104167	314.667	0.300542	300.542
2019-12-01_05:00:00	2019-12-01 15:00:00	0	0	0	0	0	0	294.78	10.91	-4.28	21.63	11.7195	291.42	20.6	21.7	6.2	291.8	90.3	161		2019-12-06	32.4742	8.24583	2.00542	468.583	0.45025	450.25
2019-12-01_06:00:00	2019-12-01 16:00:00	0	0	0	0	0	0	294.21	11.08	-3.97	21.06	11.7698	289.713	18.8	19.6	5.5	301	89.1	190		2019-12-07	19.67	20.4417	1.185	271.5	1.34154	1341.54
2019-12-01_07:00:00	2019-12-01 17:00:00	0	0	0	0	0	0	293.46	11.23	-3.61	20.31	11.796	287.821	17.4	19.9	5.2	298.4	63.5	217		2019-12-08	12.8229	274.3	0.771667	11763.3	13.8824	13882.4
2019-12-01_08:00:00	2019-12-01 18:00:00	0	0	0	0	0	0	292.55	10.78	-2.93	19.4	11.1711	285.206	12.7	20.4	5.8	297.3	56	246		2019-12-09	15.6179	115.025	0.88125	7518.88	3.7147	3714.7
2019-12-01_09:00:00	2019-12-01 19:00:00	0	0	0	0	0	0	291.04	9.37	-2.14	17.89	9.61127	282.865	8.6	19.4	5.5	288.1	47.7	370		2019-12-10	23.3633	95.4417	0.703333	4415.21	3.67025	3670.25
2019-12-01_10:00:00	2019-12-01 20:00:00	0	0	0	0	0	0	290.04	8.68	-2.05	16.89	8.91879	283.288	8.2	18.2	4.5	295.6	29	228		2019-12-11	29.6617	23.2667	0.837083	1619.29	0.831292	831.292
2019-12-01_11:00:00	2019-12-01 21:00:00	0	0.01	0.01	0	0	0	288.75	7.56	-3.55	15.6	8.35201	295.154	6.1	16.7	3.6	304.9	25	293		2019-12-12	16.2437	25.8333	0.2225	627.792	0.879208	879.208
2019-12-01_12:00:00	2019-12-01 22:00:00	0	0.11	0.1	0.01	0	0	287.62	7.83	-4.57	14.47	9.06608	300.27	9.4	15.6	4.1	295.3	33.1	422		2019-12-13	14.4938	21.3375	0.128333	680.083	0.385625	385.625
2019-12-01_13:00:00	2019-12-01 23:00:00	0	0.1	0.1	0.01	0	0	287.72	9	-3.79	14.57	9.76545	292.837	9.7	15.3	4.7	296	34.6	342		2019-12-14	9.89	17.4667	0.132083	456.042	0.583542	583.542
2019-12-01_14:00:00	2019-12-02 00:00:00	0	0.1	0.09	0.01	0	0	287.02	8.72	-3.14	13.87	9.26812	289.804	11.2	15	5	301	41.1	387		2019-12-15	9.86167	27.2417	0.515833	775.042	0.863833	863.833
2019-12-01_15:00:00	2019-12-02 01:00:00	0	0.1	0.09	0.01	0	0	285.87	8.16	-2.26	12.72	8.46718	285.481	10.4	14.3	4.5	299.6	44.5	516		2019-12-16	11.3229	47.1583	0.602083	771.833	1.82639	1826.39
2019-12-01_16:00:00	2019-12-02 02:00:00	0	0.09	0.08	0	0	0	284.66	7.07	-2.01	11.51	7.35017	285.87	9.2	13.9	4.1	292.1	38.2	380		2019-12-17	22.305	108.008	1.06458	2822.58	2.44192	2441.92
2019-12-01_17:00:00	2019-12-02 03:00:00	0	0.06	0.05	0	0	0	284.05	6.41	-2.68	10.9	6.9477	292.69	8.6	13.7	4.3	298.8	32.4	307		2019-12-18	17.8996	135.367	0.9175	2009.12	3.08725	3087.25
2019-12-01_18:00:00	2019-12-02 04:00:00	0.01	0.22	0.03	0	0	0	284.3	6.92	-3.54	11.15	7.7729	297.093	8	14.1	4.6	296.4	31.4	160		2019-12-19	20.7017	94.8708	1.0875	3439.67	2.86442	2864.42
2019-12-01_19:00:00	2019-12-02 05:00:00	0.04	1.02	0.06	0	0	0	284.2	7.94	-3.32	11.05	8.60616	292.692	11.2	13.8	4.9	294.3	41.9	153		2019-12-20	39.34	165.554	2.01792	4235.42	4.91733	4917.33
2019-12-01_20:00:00	2019-12-02 06:00:00	0.06	1.57	0.09	0	0	0	285.51	9.35	-3.16	12.36	9.86955	288.674	9.8	14.1	5.2	291.9	47.2	321		2019-12-21	24.9425	93.225	0.929583	3744.25	2.96454	2964.54
2019-12-01_21:00:00	2019-12-02 07:00:00	2.05	18.15	2.95	0	0	0	286.37	12.21	-3.34	13.22	12.6586	285.299	14.8	14.1	5.7	281.9	78.9	226		2019-12-22	13.6725	140.104	0.544167	4190.58	3.51683	3516.83
2019-12-01_22:00:00	2019-12-02 08:00:00	5.96	43.76	8.52	0	0	0	287.17	12.49	-3.7	14.02	13.0265	286.501	13	15.1	7.8	285.9	94.8	196		2019-12-23	7.28667	54.2958	0.3225	1209.92	1.38896	1388.96
2019-12-01_23:00:00	2019-12-02 09:00:00	9.8	69.01	13.96	0	0	0	288.01	13.08	-4.11	14.86	13.7105	287.444	14.8	16.1	8	287.7	111.7	244		2019-12-24	2.9075	27.9083	0.0975	1375.5	0.745667	745.667
2019-12-02_00:00:00	2019-12-02 10:00:00	20.06	137.61	28.48	0	0	0	288.52	13.62	-4.28	15.37	14.2767	287.445	16	15.7	7.5	284.5	127.4	257		2019-12-25	3.285	9.52917	0.035	414.625	0.26675	266.75
2019-12-02_01:00:00	2019-12-02 11:00:00	14.44	99.05	20.48	0	0	0	288.95	14.25	-3.34	15.8	14.6362	283.191	25.4	15.6	7.1	284.2	172.9	233		2019-12-26	4.7975	11.0083	0.07	317.667	0.4255	425.5
2019-12-02_02:00:00	2019-12-02 12:00:00	9.43	64.89	13.49	0	0	0	289.4	14.77	-3.34	16.25	15.1429	282.742	24.2	15.9	7	283	156.7	216		2019-12-27	2.88417	6.94583	0	269.958	0.135708	135.708
2019-12-02_03:00:00	2019-12-02 13:00:00	5.09	34.15	7.46	0	0	0	290.05	14.83	-2.72	16.9	15.0774	280.393	19	16.9	7.3	270	114.8	227		2019-12-28	2.66458	5.11667	0.0420833	114.75	0.123833	123.833
2019-12-02_04:00:00	2019-12-02 14:00:00	2.65	16.57	4.04	0	0	0	290.39	15.04	-1.8	17.24	15.1473	276.825	10.1	18.2	8	280.1	78	324		2019-12-29	5.46542	11.2958	0.217083	206.958	0.288833	288.833
2019-12-02_05:00:00	2019-12-02 15:00:00	1.54	10.27	2.62	0	0	0	290.02	15.33	-0.78	16.87	15.3498	272.913	9	18.5	7.5	272.5	79.6	349		2019-12-30	4.28167	5.96667	0.172917	270.5	0.205652	205.652
2019-12-02_06:00:00	2019-12-02 16:00:00	1.03	7.44	2.08	0	0	0	289.42	15.56	-0.67	16.27	15.5744	272.466	9.8	18.5	8.6	272.1	65.7	293		2019-12-31	7.6075	15.1167	0.372083	362.042	0.593542	593.542
2019-12-02_07:00:00	2019-12-02 17:00:00	1.64	12.56	3.64	0	0	0	288.61	15.32	-0.27	15.46	15.3224	271.01	10.6	18	8.7	277.4	101.6	343		2020-01-01	6.37727	22.0455	0.148182	821.364
2019-12-02_08:00:00	2019-12-02 18:00:00	1.72	16.06	4.93	0	0	0	287.46	14.32	0.17	14.31	14.321	269.32	8.9	17.1	7.4	272	120.4	244
2019-12-02_09:00:00	2019-12-02 19:00:00	1.02	15.54	5.08	0	0	0	285.99	11.9	0.44	12.84	11.9081	267.882	9.8	15.7	6.2	272.3	125.3	288
2019-12-02_10:00:00	2019-12-02 20:00:00	0.14	14.08	4.97	0	0	0	285.09	11.29	1.19	11.94	11.3525	263.983	13.7	14.7	5.7	277.2	170.3	315
2019-12-02_11:00:00	2019-12-02 21:00:00	0.07	16.93	5.88	0	0	0	284.14	9.81	1.83	10.99	9.97923	259.433	29.8	14.1	5.3	274.9	238.1	268
2019-12-02_12:00:00	2019-12-02 22:00:00	0.03	22.07	7.58	0	0	0	283.33	8.44	1.59	10.18	8.58846	259.331	30.2	13	4.5	268.2	252.2
2019-12-02_13:00:00	2019-12-02 23:00:00	0.01	22.53	7.82	0	0	0	282.32	6.95	1.09	9.17	7.03496	261.087	23.7	12	4.4	277.8	205.2	165
2019-12-02_14:00:00	2019-12-03 00:00:00	0	23.19	8.04	0	0	0	281.37	5.86	0.96	8.22	5.93811	260.696	32.3	10.8	2.9	279	281.1	184
2019-12-02_15:00:00	2019-12-03 01:00:00	0	23.02	7.97	0	0	0	280.6	5.65	0.8	7.45	5.70636	261.941	35.7	9.9	2.9	294.9	313.5	293
2019-12-02_16:00:00	2019-12-03 02:00:00	0	22.36	7.86	0	0	0	280.03	5.55	0.33	6.88	5.5598	266.597	33.1	9.2	3.4	295.6	252.8	263
2019-12-02_17:00:00	2019-12-03 03:00:00	0	26.91	9.32	0	0	0	279.88	5.69	-0.09	6.73	5.69071	270.906	32.4	8.5	3.2	299.1	239.1	224
2019-12-02_18:00:00	2019-12-03 04:00:00	0	31.4	10.6	0	0	0	279.72	5.66	-0.19	6.57	5.66319	271.923	28.9	7.9	2.4	305.1	219.5	308
2019-12-02_19:00:00	2019-12-03 05:00:00	0	31.98	10.88	0	0	0	279.38	5.58	-0.54	6.23	5.60607	275.528	23.4	6.9	1	309.1	161.6	354
2019-12-02_20:00:00	2019-12-03 06:00:00	0	27.89	9.85	0	0	0	282.15	6.18	0.3	9	6.18728	267.221	16.8	7.4	1.3	300.2	111.7	479
2019-12-02_21:00:00	2019-12-03 07:00:00	0	22.84	8.3	0	0	0	284.3	6.92	0.9	11.15	6.97828	262.59	12.4	10.5	2.9	293.3	75.8	384
2019-12-02_22:00:00	2019-12-03 08:00:00	0	21.1	7.75	0	0	0	286.18	7.02	0.84	13.03	7.07008	263.177	10.6	12.5	3.9	262.2	56.2	424
2019-12-02_23:00:00	2019-12-03 09:00:00	0	20.81	7.65	0	0	0	287.89	7.39	0.66	14.74	7.41941	264.896	7.3	14.4	4.6	269.6	52.8	634
2019-12-03_00:00:00	2019-12-03 10:00:00	0	16.97	6.34	0	0	0	289.5	7.74	0.39	16.35	7.74982	267.115	6.6	16.6	4.3	272.8	45.8	534
2019-12-03_01:00:00	2019-12-03 11:00:00	0	14.11	5.29	0	0	0	290.81	7.96	0.32	17.66	7.96643	267.698	5.5	18.6	3.7	279.2	39.2	511
2019-12-03_02:00:00	2019-12-03 12:00:00	0	14.37	5.45	0	0	0	291.9	8	0.18	18.75	8.00202	268.711	7.5	20.1	4.2	283.8	38	518
2019-12-03_03:00:00	2019-12-03 13:00:00	0	14.33	5.67	0.02	0	0	292.75	8.26	0.21	19.6	8.26267	268.544	3	21.1	4.9	290.5	32.7	472
2019-12-03_04:00:00	2019-12-03 14:00:00	0	13.16	5.49	0.05	0	0	293.32	8.39	0.35	20.17	8.3973	267.611	5.6	22	5.2	277.7	28.9	439
2019-12-03_05:00:00	2019-12-03 15:00:00	0.01	12.73	5.41	0.06	0	0	293.62	8.3	0.56	20.47	8.31887	266.14	5	22.5	5	270.6	29.1	501
2019-12-03_06:00:00	2019-12-03 16:00:00	0.04	13.66	5.82	0.08	0	0	293.49	8.47	0.72	20.34	8.50055	265.141	3.8	22.5	4.9	264.4	28.4	323
2019-12-03_07:00:00	2019-12-03 17:00:00	0.07	14.39	5.88	0.06	0	0	292.8	8.78	0.86	19.65	8.82202	264.406	2.4	22.2	5	258	25.6	310
2019-12-03_08:00:00	2019-12-03 18:00:00	0.05	15.07	5.97	0.05	0	0	291.5	8.49	0.69	18.35	8.51799	265.354	7.5	21.6	4.3	262.1	32.2	245
2019-12-03_09:00:00	2019-12-03 19:00:00	0.05	16.76	6.53	0.05	0	0	289.15	7.36	0.01	16	7.36001	269.922	6.5	20.2	3.5	269.5	36.7	164
2019-12-03_10:00:00	2019-12-03 20:00:00	0.06	17.17	6.68	0.05	0	0	288.53	8.12	-0.46	15.38	8.13302	273.242	6.2	18.5	3.2	292.2	32.6	172
2019-12-03_11:00:00	2019-12-03 21:00:00	0.05	16.52	6.43	0.04	0	0	287.96	8.01	-0.72	14.81	8.04229	275.136	4.4	17.7	3.6	296.9	23.3	132
2019-12-03_12:00:00	2019-12-03 22:00:00	0.03	14.11	5.42	0.02	0	0	287.32	7.85	-0.05	14.17	7.85016	270.365	2	17	3.6	299.3	17.5	106
2019-12-03_13:00:00	2019-12-03 23:00:00	0.01	12.08	4.67	0.01	0	0	286.5	7.24	0.26	13.35	7.24467	267.943	1.4	16	3.1	301.4	14.7	137
2019-12-03_14:00:00	2019-12-04 00:00:00	0	10.94	4.32	0.01	0	0	285.68	6.41	0.07	12.53	6.41038	269.374	4.1	15	2.6	304.8	15.4	171
2019-12-03_15:00:00	2019-12-04 01:00:00	0	9.65	4.07	0.01	0	0	284.74	5.68	-0.01	11.59	5.68001	270.101	5.6	14.9	3	294.3	15.5	203
2019-12-03_16:00:00	2019-12-04 02:00:00	0	11.15	4.81	0.01	0	0	283.88	5.26	-0.11	10.73	5.26115	271.198	0.4	13.9	2	306.3	10.3	222
2019-12-03_17:00:00	2019-12-04 03:00:00	0	12.32	5.53	0.01	0	0	283.2	4.89	-0.33	10.05	4.90112	273.861	1.7	11.9	0.8	316.8	10.5	227
2019-12-03_18:00:00	2019-12-04 04:00:00	0	13.33	5.92	0	0	0	282.52	4.52	-0.48	9.37	4.54542	276.062	1.8	9.5	0.6	313.8	9.1	203
2019-12-03_19:00:00	2019-12-04 05:00:00	0	14.66	6.59	0	0	0	281.77	4.15	-0.92	8.62	4.25075	282.5	4.2	7.4	0.9	301.4	11.5	179
2019-12-03_20:00:00	2019-12-04 06:00:00	0	15.92	7.08	0	0	0	286.05	4.47	-0.51	12.9	4.499	276.509	2.3	8.7	1	312.8	11.7	143
2019-12-03_21:00:00	2019-12-04 07:00:00	0.01	17.25	7.7	0	0	0	288.43	6.59	0.63	15.28	6.62005	264.539	1.6	15.4	2.1	281.7	15.4	230
2019-12-03_22:00:00	2019-12-04 08:00:00	0.01	16.58	7.53	0	0	0	289.55	7.13	1.18	16.4	7.22698	260.603	1.1	17.6	3.4	266.6	10.8	79
2019-12-03_23:00:00	2019-12-04 09:00:00	0.01	15.18	6.96	0	0	0	290.69	7.27	1.19	17.54	7.36675	260.704	3.9	18.6	4.2	267.9	12.9	55
2019-12-04_00:00:00	2019-12-04 10:00:00	0.01	12.41	5.8	0	0	0	291.83	7.75	1.18	18.68	7.83932	261.343	4.2	19.9	4.1	260.4	11.8	69
2019-12-04_01:00:00	2019-12-04 11:00:00	0.02	9.47	4.43	0	0	0	292.84	8.09	1.19	19.69	8.17705	261.632	-0.2	21.5	3.9	273.4	7.5	62
2019-12-04_02:00:00	2019-12-04 12:00:00	0.02	8.07	3.76	0	0	0	293.79	8.32	1.29	20.64	8.41941	261.187	2.4	22.7	3.9	275.9	8.9	66
2019-12-04_03:00:00	2019-12-04 13:00:00	0.02	7.43	3.43	0	0	0	294.4	8.14	1.56	21.25	8.28814	259.151	2	23.8	4.1	276.9	9.4	88
2019-12-04_04:00:00	2019-12-04 14:00:00	0.01	5.48	2.57	0.01	0	0	295.02	7.98	1.81	21.87	8.1827	257.221	5.3	24.6	5.1	257.9	13.7	281
2019-12-04_05:00:00	2019-12-04 15:00:00	0	5.15	2.39	0	0	0	295.2	7.76	2	22.05	8.01359	255.548	5.8	24.8	4.9	259.5	15.6	1015
2019-12-04_06:00:00	2019-12-04 16:00:00	0	4.94	2.28	0	0	0	295.08	7.54	1.99	21.93	7.79819	255.215	0.8	24.7	4.7	259.2	12.1	365
2019-12-04_07:00:00	2019-12-04 17:00:00	0	4.14	1.88	0	0	0	294.6	7.22	1.92	21.45	7.47093	255.108	3.3	24.5	4.4	257.5	14.6	221
2019-12-04_08:00:00	2019-12-04 18:00:00	0	4.79	2.12	0	0	0	293.42	6.49	1.62	20.27	6.68913	255.985	4.6	24.1	3.4	257.9	14.7	176
2019-12-04_09:00:00	2019-12-04 19:00:00	0	5.61	2.51	0.01	0	0	289.21	3.94	0.12	16.06	3.94183	268.255	2.7	22.7	2.7	273.3	12	164
2019-12-04_10:00:00	2019-12-04 20:00:00	0	5.96	2.83	0.03	0	0	288.26	4.42	-0.63	15.11	4.46467	278.112	4.7	20.4	1.6	285.9	13.5	128
2019-12-04_11:00:00	2019-12-04 21:00:00	0	6.18	2.96	0.03	0	0	287.62	4.92	-0.67	14.47	4.96541	277.755	5.1	17.3	1.1	310.9	16.4	193
2019-12-04_12:00:00	2019-12-04 22:00:00	0	6.59	2.97	0.01	0	0	286.75	4.88	-0.45	13.6	4.9007	275.269	6.5	14.8	1.3	302.9	19.6	104
2019-12-04_13:00:00	2019-12-04 23:00:00	0	7.08	3.14	0	0	0	285.89	4.74	-0.45	12.74	4.76131	275.423	3.9	13.3	0.6	280.6	18.1	172
2019-12-04_14:00:00	2019-12-05 00:00:00	0	6.99	3.1	0	0	0	284.69	4.19	-0.57	11.54	4.22859	277.747	3	12.2	1	284.5	17.9	203
2019-12-04_15:00:00	2019-12-05 01:00:00	0	6.88	3.05	0	0	0	283.42	3.8	-0.81	10.27	3.88537	282.033	3.7	11.5	1	285.7	22.1	248
2019-12-04_16:00:00	2019-12-05 02:00:00	0	7.21	3.16	0	0	0	282.29	3.61	-0.91	9.14	3.72293	284.148	5.3	11.2	0.9	304.6	26.2	174
2019-12-04_17:00:00	2019-12-05 03:00:00	0	7.82	3.41	0	0	0	281.32	3.34	-1.15	8.17	3.53244	288.999	7.2	9.8	1.9	301.6	30.1	175
2019-12-04_18:00:00	2019-12-05 04:00:00	0	9.03	3.96	0	0	0	280.64	2.99	-1.15	7.49	3.20353	291.038	5	8.3	1.7	306.6	28.8	191
2019-12-04_19:00:00	2019-12-05 05:00:00	0	10.3	4.56	0	0	0	280.13	2.75	-1.01	6.98	2.92961	290.167	5.2	8.4	0.2	350.8	28.2	324
2019-12-04_20:00:00	2019-12-05 06:00:00	0	10.64	4.77	0	0	0	285.76	2.01	0.76	12.61	2.14888	249.288	6.3	10.1	0.1	305.8	30.3	444
2019-12-04_21:00:00	2019-12-05 07:00:00	0	9.72	4.6	0	0	0	288.01	2.36	1.87	14.86	3.01106	231.608	7.2	15.9	1.4	274.3	35.9	538
2019-12-04_22:00:00	2019-12-05 08:00:00	0	6.46	3.21	0	0	0	289.95	2.76	2.49	16.8	3.71722	227.944	2.4	18.9	2.9	260.9	26.7	482
2019-12-04_23:00:00	2019-12-05 09:00:00	0	4.65	2.33	0	0	0	291.71	3.23	2.7	18.56	4.20986	230.107	2.1	21.1	3	265.4	19.5	814
2019-12-05_00:00:00	2019-12-05 10:00:00	0	4.33	2.15	0	0	0	293.14	3.71	2.61	19.99	4.5361	234.873	5.7	23.1	3.2	264.7	18.8	307
2019-12-05_01:00:00	2019-12-05 11:00:00	0	4.22	2.1	0	0	0	294.36	4.1	2.56	21.21	4.83359	238.02	8.9	24.2	3.7	262.7	19.5	164
2019-12-05_02:00:00	2019-12-05 12:00:00	0	4.06	2.01	0	0	0	295.42	4.55	2.27	22.27	5.08482	243.485	4.9	25.3	3.6	263.2	17.2	110
2019-12-05_03:00:00	2019-12-05 13:00:00	0	3.92	1.92	0	0	0	296.25	4.76	2.13	23.1	5.21483	245.892	3	26.5	3.7	266.4	12.7	114
2019-12-05_04:00:00	2019-12-05 14:00:00	0	3.71	1.81	0	0	0	296.79	4.87	2.15	23.64	5.32348	246.18	0.8	27.2	3.9	268	7.7	330
2019-12-05_05:00:00	2019-12-05 15:00:00	0	3.45	1.68	0	0	0	297.01	4.88	2.02	23.86	5.28155	247.514	2.2	27.6	3.9	270.4	9.6	1275
2019-12-05_06:00:00	2019-12-05 16:00:00	0	3.35	1.62	0	0	0	296.95	4.83	1.66	23.8	5.1073	251.033	-0.9	27.3	4.2	266.9	6.2	683
2019-12-05_07:00:00	2019-12-05 17:00:00	0	3.39	1.63	0	0	0	296.59	4.85	1.13	23.44	4.9799	256.885	1	26.9	3.9	267.9	8.4	199
2019-12-05_08:00:00	2019-12-05 18:00:00	0	3.98	1.9	0	0	0	295.68	4.46	0.67	22.53	4.51004	261.457	0.7	26	4	266.9	8.7	143
2019-12-05_09:00:00	2019-12-05 19:00:00	0	5.2	2.6	0.02	0	0	290.71	3.27	-0.29	17.56	3.28283	275.068	0.4	24.3	2.7	283.9	8	106
2019-12-05_10:00:00	2019-12-05 20:00:00	0	6.97	4.03	0.1	0	0	290.21	3.15	-1.77	17.06	3.61323	299.332	2.9	21.8	1.6	309.1	11.3	146
2019-12-05_11:00:00	2019-12-05 21:00:00	0	5.44	3.06	0.07	0	0	290.53	3.84	-2.17	17.38	4.41073	299.471	3.1	18.9	0.7	310	15.3	112
2019-12-05_12:00:00	2019-12-05 22:00:00	0.01	4.32	2.38	0.05	0	0	289.82	3.95	-1.92	16.67	4.39191	295.923	6.3	16.9	0.4	314.5	18.4	150
2019-12-05_13:00:00	2019-12-05 23:00:00	0.04	3.9	1.85	0.01	0	0	288.99	3.86	-1.86	15.84	4.28476	295.728	7.4	15	0.7	331.6	19.1	120
2019-12-05_14:00:00	2019-12-06 00:00:00	0.05	4	1.9	0.01	0	0	288.4	3.71	-2.15	15.25	4.28796	300.093	6.6	13.5	0.9	326.5	17.3	203
2019-12-05_15:00:00	2019-12-06 01:00:00	0.06	4	1.89	0.01	0	0	288.24	3.63	-2.6	15.09	4.46508	305.612	7.4	12.3	0.9	328.8	15.9	156
2019-12-05_16:00:00	2019-12-06 02:00:00	0.09	4.41	2	0	0	0	288.25	3.4	-3.1	15.1	4.60109	312.357	8.3	11.4	1	321	16.1	129
2019-12-05_17:00:00	2019-12-06 03:00:00	0.1	4.66	2.11	0	0	0	288.23	3.34	-3.4	15.08	4.76609	315.51	8.4	10.7	0.9	307.6	15.7	109
2019-12-05_18:00:00	2019-12-06 04:00:00	0.06	4.45	2.09	0.01	0	0	288.36	3.66	-3.52	15.21	5.07799	313.883	8.3	10.2	0.7	310.3	15.5	120
2019-12-05_19:00:00	2019-12-06 05:00:00	0.03	4.24	2.07	0.01	0	0	288.51	4.04	-3.51	15.36	5.35179	310.985	9.6	10.1	0.3	318	16.3	379
2019-12-05_20:00:00	2019-12-06 06:00:00	0.01	3.95	1.94	0.01	0	0	292.88	5.34	-2.78	19.73	6.0203	297.501	15.3	11.5	0.1	312.7	22.6	343
2019-12-05_21:00:00	2019-12-06 07:00:00	0.05	4.03	1.87	0	0	0	295.3	6.98	-1.94	22.15	7.24458	285.533	18.7	19	1.3	277.6	27.5	503
2019-12-05_22:00:00	2019-12-06 08:00:00	0.26	5.13	2.06	0	0	0	296.42	7.88	-0.35	23.27	7.88777	272.543	9.2	23.8	4.8	286.6	19.8	766
2019-12-05_23:00:00	2019-12-06 09:00:00	0.4	5.58	2.14	0	0	0	297.27	7.61	-0.13	24.12	7.61111	270.979	16	25.6	5.2	282.3	26.3	546
2019-12-06_00:00:00	2019-12-06 10:00:00	0.47	5.74	2.13	0	0	0	298.17	7.52	0.3	25.02	7.52598	267.715	8.6	27	5.4	277.7	21.4	505
2019-12-06_01:00:00	2019-12-06 11:00:00	0	0	0	0	0	0	299.02	4.7	0.51	25.87	4.72759	263.807	1.7	28.1	5.2	273.7	25.7	491
2019-12-06_02:00:00	2019-12-06 12:00:00	0	0	0	0	0	0	299.63	5.84	0.97	26.48	5.92001	260.569	5	28.6	4.7	271.4	28.1	517
2019-12-06_03:00:00	2019-12-06 13:00:00	0	0.06	0.05	0	0	0	300.1	5.6	1.21	26.95	5.72923	257.807	8.5	29.2	5	274.2	30.4	573
2019-12-06_04:00:00	2019-12-06 14:00:00	0	0.16	0.14	0.01	0	0	300.39	5.32	1.71	27.24	5.58807	252.181	10.7	29.9	5.2	280.1	35	892
2019-12-06_05:00:00	2019-12-06 15:00:00	0	0.09	0.08	0	0	0	300.47	5.16	1.82	27.32	5.47156	250.572	13	29.9	5.8	276.7	45.6	1678
2019-12-06_06:00:00	2019-12-06 16:00:00	0	0.19	0.17	0.01	0	0	300.28	4.91	2.08	27.13	5.3324	247.041	11.5	29.6	4.9	279.2	41.8	914
2019-12-06_07:00:00	2019-12-06 17:00:00	0	0.34	0.3	0.02	0	0	299.74	4.68	1.84	26.59	5.02872	248.537	5.4	28.9	4.5	270.9	31	654
2019-12-06_08:00:00	2019-12-06 18:00:00	0	132.61	120.67	7.88	0.02	0.01	296.93	-0.25	3.81	23.78	3.81819	176.246	6.1	28.3	4.1	269.6	33.6	657
2019-12-06_09:00:00	2019-12-06 19:00:00	0	308.87	281.23	18.05	0.04	0.02	289.78	-2.4	1.78	16.63	2.98804	126.563	2.7	26.6	2.8	259.7	22.9	221
2019-12-06_10:00:00	2019-12-06 20:00:00	0	171.77	156.31	9.89	0.02	0.01	287.94	-1.59	-2.09	14.79	2.62606	37.2627	3.1	24.6	2	283.9	27.1	166
2019-12-06_11:00:00	2019-12-06 21:00:00	0	106.79	97	6.05	0.01	0.01	287.2	-1.17	-3.36	14.05	3.55788	19.1989	3.9	22.8	1.5	301.6	25.5	178
2019-12-06_12:00:00	2019-12-06 22:00:00	0	63.6	57.7	3.54	0.01	0	286.72	-0.93	-3.89	13.57	3.99962	13.4457	3.9	22	1.5	303.5	24	271
2019-12-06_13:00:00	2019-12-06 23:00:00	0	47.89	43.53	2.63	0.01	0	286.55	-0.58	-4.3	13.4	4.33894	7.68199	6	18.8	1	323.3	32.7	275
2019-12-06_14:00:00	2019-12-07 00:00:00	0	39.5	35.97	2.15	0	0	286.66	-0.09	-4.71	13.51	4.71086	1.09477	5	16.3	1.3	312.3	33.3	327
2019-12-06_15:00:00	2019-12-07 01:00:00	0	34.89	31.78	1.87	0	0	285.85	-0.02	-4.81	12.7	4.81004	0.238311	6.3	14.1	1	314.6	34	184
2019-12-06_16:00:00	2019-12-07 02:00:00	0	30.07	27.38	1.59	0	0	285.59	-0.12	-4.93	12.44	4.93146	1.39443	6	13.1	0.7	322.4	31.9	190
2019-12-06_17:00:00	2019-12-07 03:00:00	0	25.06	22.82	1.31	0	0	285.27	0.14	-4.99	12.12	4.99196	358.393	6	12	0.9	322.3	31.6	172
2019-12-06_18:00:00	2019-12-07 04:00:00	0	20.08	18.3	1.04	0	0	285.35	0.46	-4.93	12.2	4.95141	354.669	5.9	11.1	0.8	334.8	29.9	174
2019-12-06_19:00:00	2019-12-07 05:00:00	0	15.32	13.96	0.78	0	0	285.57	0.92	-4.92	12.42	5.00528	349.409	6	9.7	0.8	326.2	28.6	509
2019-12-06_20:00:00	2019-12-07 06:00:00	0	11.54	10.46	0.58	0	0	291.92	1.7	-3.82	18.77	4.1812	336.01	6.2	10.8	0.6	325	27.3	207
2019-12-06_21:00:00	2019-12-07 07:00:00	0	7.56	6.85	0.38	0	0	295.97	2.38	-3.73	22.82	4.42462	327.459	3.2	15.6	0.6	314	25.9	319
2019-12-06_22:00:00	2019-12-07 08:00:00	0	3.12	2.82	0.15	0	0	297.75	2.76	-2.57	24.6	3.77127	312.958	4.1	21.9	0.4	288.1	26.8	402
2019-12-06_23:00:00	2019-12-07 09:00:00	0	1.89	1.68	0.09	0	0	298.76	3.76	-2.02	25.61	4.26825	298.246	5.4	24.6	1.2	241.8	22.8	330
2019-12-07_00:00:00	2019-12-07 10:00:00	0	1.47	1.3	0.07	0	0	299.68	4.54	-1.6	26.53	4.81369	289.414	5.3	26	2.3	253	19	279
2019-12-07_01:00:00	2019-12-07 11:00:00	0	1.4	1.23	0.06	0	0	300.45	4.84	-1.38	27.3	5.03289	285.914	2.1	27.2	2.6	257.2	14.8	335
2019-12-07_02:00:00	2019-12-07 12:00:00	0	1.37	1.19	0.06	0	0	301.16	4.96	-0.92	28.01	5.0446	280.508	2	28.1	3.2	271.6	15.2	305
2019-12-07_03:00:00	2019-12-07 13:00:00	0	1.25	1.07	0.05	0	0	301.75	4.82	-0.51	28.6	4.84691	276.04	4.8	28.9	3.5	250.2	13	241
2019-12-07_04:00:00	2019-12-07 14:00:00	0	1.26	1.09	0.06	0	0	302.22	4.68	-0.25	29.07	4.68667	273.058	6.9	29.9	4.2	227.7	15	342
2019-12-07_05:00:00	2019-12-07 15:00:00	0	1.4	1.21	0.06	0	0	302.48	4.7	0.01	29.33	4.70001	269.878	6.8	29.9	4.5	224.7	14.9	550
2019-12-07_06:00:00	2019-12-07 16:00:00	0	1.57	1.37	0.07	0	0	302.5	4.47	0.25	29.35	4.47699	266.799	5.8	29.7	4.2	240.6	12.3	405
2019-12-07_07:00:00	2019-12-07 17:00:00	0	2.46	2.19	0.13	0	0	302.13	4.25	0.21	28.98	4.25519	267.171	7	29.6	3.8	241	13.1	260
2019-12-07_08:00:00	2019-12-07 18:00:00	0	19.93	17.96	1.15	0	0	300.61	0.67	1.12	27.46	1.30511	210.888	9.3	28.6	3.8	226.2	15.6	204
2019-12-07_09:00:00	2019-12-07 19:00:00	0	68.62	61.19	3.86	0.01	0	293.67	-3.06	-6.23	20.52	6.94093	26.1591	8.9	26.6	2.2	223.7	15	150
2019-12-07_10:00:00	2019-12-07 20:00:00	0	77.51	69.11	4.32	0.01	0	292.42	-2.12	-6.28	19.27	6.62818	18.6537	10.9	22.8	0.7	285.4	19.2	146
2019-12-07_11:00:00	2019-12-07 21:00:00	0	71.24	63.21	3.91	0.01	0	291.66	-1.81	-6.18	18.51	6.4396	16.3244	8.4	18.8	0.5	330	19.8	233
2019-12-07_12:00:00	2019-12-07 22:00:00	0	50.31	44.08	2.68	0.01	0	291.43	-1.52	-5.92	18.28	6.11202	14.4001	25.4	17.1	0.9	117.9	37.3	125
2019-12-07_13:00:00	2019-12-07 23:00:00	0	38.82	33.86	2.02	0	0	290.97	-1.1	-5.82	17.82	5.92304	10.7029	332.9	16.1	0.4	99.8	353.7	127
2019-12-07_14:00:00	2019-12-08 00:00:00	0	31.61	27.82	1.64	0	0	290.64	-0.27	-5.76	17.49	5.76632	2.68385	305.4	13.6	0.4	334.4	324.8	161
2019-12-07_15:00:00	2019-12-08 01:00:00	0	31.42	27.72	1.62	0	0	290.07	0.18	-6.06	16.92	6.06267	358.299	190.3	12.3	0.6	329.4	209.6	365
2019-12-07_16:00:00	2019-12-08 02:00:00	0	18.44	15.9	0.9	0	0	290.82	1.23	-6.47	17.67	6.58588	349.236	152.3	10.9	0.8	322.9	168.8	312
2019-12-07_17:00:00	2019-12-08 03:00:00	0	6.97	5.38	0.27	0	0	290.99	2.18	-6.61	17.84	6.96021	341.747	164.9	9.8	0.6	316.5	179.8	543
2019-12-07_18:00:00	2019-12-08 04:00:00	0	4.06	2.79	0.12	0	0	290.98	2.91	-6.31	17.83	6.94868	335.242	193.9	10.2	1	120.4	208.7	521
2019-12-07_19:00:00	2019-12-08 05:00:00	0	3.41	2.2	0.09	0	0	290.62	3.3	-5.98	17.47	6.83011	331.108	323.1	11.7	1.5	120.1	341.6	869
2019-12-07_20:00:00	2019-12-08 06:00:00	0	3.27	2.12	0.08	0	0	293.15	4.17	-6.04	20	7.33965	325.379	734.1	14.2	1.9	115.8	768.1	765
2019-12-07_21:00:00	2019-12-08 07:00:00	0	2.41	1.48	0.05	0	0	295.61	4.85	-5.77	22.46	7.5376	319.951	910.9	14.7	2.7	120.3	942.5	5786
2019-12-07_22:00:00	2019-12-08 08:00:00	0	1.9	1.1	0.04	0	0	297.59	5.32	-4.79	24.44	7.15867	311.999		16.6	3.3	120.6		12438
2019-12-07_23:00:00	2019-12-08 09:00:00	0	1.52	0.87	0.03	0	0	299.2	5.14	-3.71	26.05	6.33906	305.821		18.8	3.9	125.6		6735
2019-12-08_00:00:00	2019-12-08 10:00:00	0	1.08	0.67	0.02	0	0	300.63	4.99	-2.37	27.48	5.52422	295.405		21.6	4.5	137.5		4978
2019-12-08_01:00:00	2019-12-08 11:00:00	0	0.92	0.58	0.02	0	0	301.43	5.02	-1.24	28.28	5.17088	283.875		25.2	5.3	148.9		4823
2019-12-08_02:00:00	2019-12-08 12:00:00	0	0.89	0.56	0.02	0	0	302.05	5.06	-0.41	28.9	5.07658	274.632						5454
2019-12-08_03:00:00	2019-12-08 13:00:00	0	0.9	0.56	0.02	0	0	302.5	4.98	0.13	29.35	4.9817	268.505						8068
2019-12-08_04:00:00	2019-12-08 14:00:00	0	0.94	0.59	0.02	0	0	302.9	4.51	0.38	29.75	4.52598	265.184						16136
2019-12-08_05:00:00	2019-12-08 15:00:00	0	1.05	0.7	0.03	0	0	303.19	4.12	0.67	30.04	4.17412	260.763		27.3	4.5	138		28118
2019-12-08_06:00:00	2019-12-08 16:00:00	0	1.35	0.98	0.05	0	0	303.2	3.87	0.86	30.05	3.9644	257.471		26.2	4.9	139.3		24130
2019-12-08_07:00:00	2019-12-08 17:00:00	0	1.84	1.42	0.07	0	0	302.89	3.54	0.91	29.74	3.65509	255.584	604.9	25.2	3.8	128	634.9	22118
2019-12-08_08:00:00	2019-12-08 18:00:00	0	16.97	15.17	0.97	0	0	301.22	-1.01	2.61	28.07	2.79861	158.845	642.8	23.1	4.5	123.5	673.1	23000
2019-12-08_09:00:00	2019-12-08 19:00:00	0	17.74	15.91	1	0	0	295.66	-2.34	-2.36	22.51	3.32343	44.7563	642.6	20.4	3.1	116.7	672.3	24000
2019-12-08_10:00:00	2019-12-08 20:00:00	0	61.07	55.38	3.55	0.01	0	295.26	-1.12	-5.33	22.11	5.4464	11.8671	536.5	18.2	2.5	114.1	561.1	26000
2019-12-08_11:00:00	2019-12-08 21:00:00	0	62.25	56.48	3.55	0.01	0	294.41	-0.63	-4.8	21.26	4.84117	7.47741	447.9		2.3	115.4	467.2	23000
2019-12-08_12:00:00	2019-12-08 22:00:00	0	40.15	36.32	2.24	0	0	293.84	-0.58	-4.33	20.69	4.36867	7.62939	415		2	116.3	433.7	20000
2019-12-08_13:00:00	2019-12-08 23:00:00	0	38.72	35.05	2.12	0	0	293.52	-0.41	-4.55	20.37	4.56844	5.14909	318.6		2	121.8	335.9	24000
2019-12-08_14:00:00	2019-12-09 00:00:00	0	37.52	34.02	2.03	0	0	293.16	0.29	-4.35	20.01	4.35966	356.186	260		1.4	119.7	275	22000
2019-12-08_15:00:00	2019-12-09 01:00:00	0	16.96	15.25	0.89	0	0	292.98	0.88	-4.25	19.83	4.34015	348.302	216.3		0.9	105.1	229.8	15264
2019-12-08_16:00:00	2019-12-09 02:00:00	0	31.12	28.2	1.64	0	0	293.3	1.81	-4.61	20.15	4.9526	338.564	96.2		1.5	73.2	108.1	16509
2019-12-08_17:00:00	2019-12-09 03:00:00	0	22.32	20.02	1.13	0	0	293.26	2.06	-4.98	20.11	5.38925	337.527	70.6		1.1	70.3	80.7	17998
2019-12-08_18:00:00	2019-12-09 04:00:00	0	8.72	7.24	0.37	0	0	292.6	2.32	-5.32	19.45	5.80386	336.439	58		1.3	84.1	66.7	18165
2019-12-08_19:00:00	2019-12-09 05:00:00	0	4.92	3.56	0.15	0	0	292.05	2.65	-5.26	18.9	5.88983	333.261	51.2		0.7	111.4	57.5	14859
2019-12-08_20:00:00	2019-12-09 06:00:00	0	5	3.34	0.12	0	0	294.73	3.91	-4.81	21.58	6.19873	320.893	48.3		1.6	123.8	54.1	14985
2019-12-08_21:00:00	2019-12-09 07:00:00	0	4.8	3.07	0.1	0	0	297.37	5.24	-4.71	24.22	7.04569	311.951	45.8		2.4	125.2	51.7	11380
2019-12-08_22:00:00	2019-12-09 08:00:00	0	4.26	2.74	0.08	0	0	299.38	6.04	-3.75	26.23	7.10944	301.835	60.6		2.7	125.9	66.2	8203
2019-12-08_23:00:00	2019-12-09 09:00:00	0	3.67	2.42	0.07	0	0	300.97	6.13	-2.43	27.82	6.59407	291.624	77.7		2.8	129.7	86.5	7583
2019-12-09_00:00:00	2019-12-09 10:00:00	0	3.18	2.14	0.07	0	0	302.08	6.05	-1.01	28.93	6.13373	279.478	96		2	139.4	108.4	4694
2019-12-09_01:00:00	2019-12-09 11:00:00	0	2.96	2.05	0.07	0	0	302.9	5.62	0.33	29.75	5.62968	266.64	106.5		0.2	181.7	119.1	3239
2019-12-09_02:00:00	2019-12-09 12:00:00	0.06	3.3	2.12	0.07	0	0	303.59	5.09	1.13	30.44	5.21392	257.483	89.3		2.5	291	101.9	2648
2019-12-09_03:00:00	2019-12-09 13:00:00	0.3	4.78	2.18	0.06	0	0	304.21	4.84	1.52	31.06	5.07307	252.565	58.4		3.1	272	70.9	1880
2019-12-09_04:00:00	2019-12-09 14:00:00	0.53	6.53	2.58	0.07	0	0	304.62	4.82	1.49	31.47	5.04505	252.822	54		3.3	282.5	66.1	1788
2019-12-09_05:00:00	2019-12-09 15:00:00	0.79	8.42	3	0.07	0	0	304.86	4.68	1.28	31.71	4.85189	254.703	55.6		2.6	288.4	68.2	1750
2019-12-09_06:00:00	2019-12-09 16:00:00	1.22	11.69	3.76	0.09	0	0	304.82	4.8	1.13	31.67	4.93122	256.753	53.2		2.9	287.6	66.6	1747
2019-12-09_07:00:00	2019-12-09 17:00:00	1.3	16.95	8.2	0.37	0	0	303.81	1.12	2.68	30.66	2.90462	202.681	40.1	31.5	2.6	265	52	2183
2019-12-09_08:00:00	2019-12-09 18:00:00	0.85	37.02	28.6	1.72	0	0	299.66	-0.93	0.96	26.51	1.3366	135.909	35.2	30.8	2	294	46.5	2581
2019-12-09_09:00:00	2019-12-09 19:00:00	0.84	24.61	17.21	0.97	0	0	296.25	-0.85	-2.75	23.1	2.87837	17.176	117	27.6	1.9	129.8	130.6	2792
2019-12-09_10:00:00	2019-12-09 20:00:01	0.83	15.08	8.62	0.41	0	0	296.14	-0.58	-5.05	22.99	5.0832	6.55188	442.5	24.5	1.9	117.6	463.7	2840
2019-12-09_11:00:00	2019-12-09 21:00:01	0.72	25.37	18.41	1.05	0	0	295.88	-0.39	-5.24	22.73	5.25449	4.25661	252	22.7	1.5	121.6	271.4	1823
2019-12-09_12:00:00	2019-12-09 22:00:01	0.56	87.38	76	4.7	0.01	0.01	295.51	-0.37	-5.72	22.36	5.73195	3.70112	193.7	21.3	1.4	117.7	211.1	1790
2019-12-09_13:00:00	2019-12-09 23:00:01	0.43	91.19	80.1	4.85	0.01	0.01	295.24	0.06	-5.97	22.09	5.9703	359.424	182.4	20	1	111.8	199.3	1752
2019-12-09_14:00:00	2019-12-10 00:00:01	0.52	68.55	58.62	3.45	0.01	0	295.35	1.19	-5.7	22.2	5.82289	348.208	216.1	18.9	0.8	103.5	233.7	1785
2019-12-09_15:00:00	2019-12-10 01:00:01	0.34	53.54	45.96	2.64	0.01	0	295.09	2.26	-5.82	21.94	6.2434	338.778	239.5	18	0.4	81.5	259.5	1522
2019-12-09_16:00:00	2019-12-10 02:00:01	0.11	38.34	33.39	1.86	0	0	294.98	3.66	-6.16	21.83	7.16528	329.283	224	16.5	0.1	16.9	240	1304
2019-12-09_17:00:00	2019-12-10 03:00:01	0.11	15.65	12.15	0.56	0	0	294.46	4.32	-6.56	21.31	7.85468	326.634	209.2	15.6	0.6	331.7	223.4	1250
2019-12-09_18:00:00	2019-12-10 04:00:01	0.11	11.59	8.14	0.3	0	0	294.02	4.85	-6.56	20.87	8.15819	323.523	198.3	14.8	0.4	322.3	212.7	9325
2019-12-09_19:00:00	2019-12-10 05:00:01	0.06	11.45	8.29	0.28	0	0	293.62	5.59	-6.33	20.47	8.44494	318.552	198.4	14.3	0.6	325.6	214.1	8704
2019-12-09_20:00:00	2019-12-10 06:00:01	0.07	10.65	7.92	0.28	0	0	295.71	7.18	-5.79	22.56	9.22369	308.883	196.5	14.8	1.1	309.3	211.7	7068
2019-12-09_21:00:00	2019-12-10 07:00:01	0.05	10.73	8.18	0.28	0	0	297.95	6.54	-5.37	24.8	8.46218	309.389	131.6	22	3.8	302.9	148.2	7293
2019-12-09_22:00:00	2019-12-10 08:00:01	0.55	12.9	6.37	0.2	0	0	300.69	7.43	-4.71	27.54	8.7971	302.371	35.8	24.8	4.6	301.8	54.2	7147
2019-12-09_23:00:00	2019-12-10 09:00:01	3.77	33.76	8.94	0.13	0	0	302.6	8.18	-2.77	29.45	8.63628	288.708	27	26.8	4.9	293	46.4	8323
2019-12-10_00:00:00	2019-12-10 10:00:01	6.75	51.86	12.32	0.1	0	0	303.4	8.22	-1.46	30.25	8.34865	280.072	27	28.7	4.3	282.8	45.1	7608
2019-12-10_01:00:00	2019-12-10 11:00:01	8.41	62.47	14.55	0.1	0	0	304.01	7.8	-0.74	30.86	7.83502	275.42	31.8	29.8	4	283.4	49.4	7627
2019-12-10_02:00:00	2019-12-10 12:00:01	9.51	69.96	16.15	0.11	0	0	304.72	7.44	-0.16	31.57	7.44172	271.232	32	30.7	3.9	260.2	52.1	6787
2019-12-10_03:00:00	2019-12-10 13:00:01	11.04	79.69	18.19	0.11	0	0	305.29	7.24	0.2	32.14	7.24276	268.418	22.7	31.6	3.5	276.9	40.7	7031
2019-12-10_04:00:00	2019-12-10 14:00:01	11	79.13	18.29	0.12	0	0	305.72	7.17	0.25	32.57	7.17436	268.003	26.5		3.3	267.1	43.1	6933
2019-12-10_05:00:00	2019-12-10 15:00:01	11.89	85.3	19.37	0.12	0	0	306.04	6.81	0.13	32.89	6.81124	268.906		32.5	3.5	270.1		6654
2019-12-10_06:00:00	2019-12-10 16:00:01	17.57	119.67	25.55	0.07	0	0	305.99	6.99	0.02	32.84	6.99003	269.836		31.5	2.9	269.3		1868
2019-12-10_07:00:00	2019-12-10 17:00:01	16.93	115.24	24.16	0.04	0	0	303.57	3.04	1.37	30.42	3.33444	245.741	25.6	31.5	3.7	294	43	1248
2019-12-10_08:00:00	2019-12-10 18:00:01	16.11	119.98	32.53	0.66	0	0	300.32	-1.16	1.86	27.17	2.19208	148.05	20.8	31.6	2.9	281.9	39	1106
2019-12-10_09:00:00	2019-12-10 19:00:01	13.39	118.18	43.03	1.52	0	0	296.31	-2.44	-0.72	23.16	2.54401	73.5598	17.9	29.7	1.8	256.9	36.3	1206
2019-12-10_10:00:00	2019-12-10 20:00:01	12.73	102.28	31.26	0.78	0	0	295.59	-1.97	-3.4	22.44	3.92949	30.0886	14.8	26.5	2	173.8	32.3	1323
2019-12-10_11:00:00	2019-12-10 21:00:01	12.83	104.25	32.86	0.87	0	0	294.35	-1.01	-2.7	21.2	2.88272	20.5096	155.2	25.9	0.9	72.9	174.7	1071
2019-12-10_12:00:00	2019-12-10 22:00:01	12.64	106.16	34.45	0.96	0	0	293.39	-0.97	-2.44	20.24	2.62574	21.6799	177.2	25.2	1.2	8.7	194	892
2019-12-10_13:00:00	2019-12-10 23:00:01	9.4	100.96	40.05	1.34	0	0	291.67	-1.85	0.64	18.52	1.95758	109.083	62.7	23.4	0.3	210.7	72.9	890
2019-12-10_14:00:00	2019-12-11 00:00:01	6.81	91.22	39.12	1.31	0	0	289.88	-1.88	0.78	16.73	2.03539	112.533	122.5	23.6	1.5	183.9	134.3	890
2019-12-10_15:00:00	2019-12-11 01:00:01	6.51	87.31	37.14	1.24	0	0	289.09	-1.98	0.55	15.94	2.05497	105.524	138.4	24.2	2.1	156.5	157.2	890
2019-12-10_16:00:00	2019-12-11 02:00:01	5.28	81.22	35.34	1.14	0	0	288.49	-2.5	1.75	15.34	3.05164	124.992	40.8	23.8	2.5	357	54.1	870
2019-12-10_17:00:00	2019-12-11 03:00:01	4.35	75.19	32.37	0.98	0	0	287.8	-2.58	0.95	14.65	2.74935	110.214	8.4	22.5	1.1	326.6	13.2	824
2019-12-10_18:00:00	2019-12-11 04:00:01	4.34	74.32	31.58	0.95	0	0	286.95	-2.03	-0.22	13.8	2.04189	83.8149	9.3	20.5	0.4	98	13.4	703
2019-12-10_19:00:00	2019-12-11 05:00:01	4.81	76.87	32.58	1.02	0	0	286.84	-1.92	-0.92	13.69	2.12904	64.3979	12.2	18.9	0.2	312.6	18.4	1670
2019-12-10_20:00:00	2019-12-11 06:00:01	4.8	77.49	32.79	1.02	0	0	289.59	-2.16	0.33	16.44	2.18506	98.6862	17.6	18.3	0.2	14	26.2	8399
2019-12-10_21:00:00	2019-12-11 07:00:01	4.8	76.93	31.9	0.96	0	0	291.64	-1.7	0.4	18.49	1.74642	103.24	23.2	21.2	0.4	137.3	38.7	1694
2019-12-10_22:00:00	2019-12-11 08:00:01	5.6	77.9	30.91	0.94	0	0	295.62	-1.55	-1.35	22.47	2.05548	48.9453	48.8	24.8	0.9	281.7	69	2963
2019-12-10_23:00:00	2019-12-11 09:00:01	6.86	77.04	26.8	0.7	0	0	298.94	-0.11	1.67	25.79	1.67362	176.231		28.8	2.8	302.5		5798
2019-12-11_00:00:00	2019-12-11 10:00:01	5.27	74.63	28.11	0.74	0	0	298.29	-1.61	3.24	25.14	3.61797	153.576		30.8	3.7	291.5		2102
2019-12-11_01:00:00	2019-12-11 11:00:01	6.42	74.71	25.85	0.61	0	0	299.77	-0.18	0.64	26.62	0.664831	164.291	12.4	32.3	4.1	298.3	26.9	479
2019-12-11_02:00:00	2019-12-11 12:00:01	7.65	75.64	24.4	0.51	0	0	300.17	0.17	0.72	27.02	0.739797	193.285	12.7	33.2	4.3	305.5	28.6	404
2019-12-11_03:00:00	2019-12-11 13:00:01	4.06	74.35	30.59	0.9	0	0	298.02	-3.63	2.78	24.87	4.57223	127.446	9.6	33.4	3.7	282	29	573
2019-12-11_04:00:00	2019-12-11 14:00:01	6.13	74.08	26.69	0.66	0	0	298.65	-1.95	-1.58	25.5	2.50976	50.9838	11.9	30.2	4.1	260.6	34.3	779
2019-12-11_05:00:00	2019-12-11 15:00:01	5.71	73.48	27.87	0.75	0	0	297.23	-2.34	-0.81	24.08	2.47623	70.9066	12.3	24.2	3.5	316.4	39	1333
2019-12-11_06:00:00	2019-12-11 16:00:01	4.46	76.36	33.79	1.14	0	0	296.58	-3.95	-0.64	23.43	4.00151	80.7968	4.9	24	3.5	330.2	17.8	2541
2019-12-11_07:00:00	2019-12-11 17:00:01	2.13	83.9	45.55	1.9	0	0	295.79	-3.46	-2.28	22.64	4.14367	56.6169	9.9	21.4	3.2	332.9	18.1	2365
2019-12-11_08:00:00	2019-12-11 18:00:01	0.78	64.55	31.88	1.02	0	0	293.34	-4.46	2.28	20.19	5.00899	117.076	0.6	20.8	1.3	83.6	6.1	764
2019-12-11_09:00:00	2019-12-11 19:00:01	0.34	53.94	24.25	0.53	0	0	290.6	-4.48	2.19	17.45	4.98663	116.051	-1	18.4	1.7	28.3	2.8	518
2019-12-11_10:00:00	2019-12-11 20:00:01	0.33	51.47	21.7	0.36	0	0	290.55	-4.15	0.93	17.4	4.25293	102.631	27.7	18.6	0.7	112.9	30.9	514
2019-12-11_11:00:00	2019-12-11 21:00:01	0.48	49.93	19.83	0.23	0	0	290.08	-3.55	0.21	16.93	3.55621	93.3852	15.2	18.7	1.7	116.7	17.4	531
2019-12-11_12:00:00	2019-12-11 22:00:01	0.84	51.62	19.85	0.21	0	0	289.94	-3.03	-0.87	16.79	3.15243	73.9798	11.4	17.7	0.8	107.5	13.3	583
2019-12-11_13:00:00	2019-12-11 23:00:01	1.24	54.39	20.99	0.27	0	0	289.06	-2.23	-0.49	15.91	2.2832	77.6074	9.6	18.8	0.9	25.1	11.5	676
2019-12-11_14:00:00	2019-12-12 00:00:01	1.76	57.7	22.24	0.32	0	0	288.1	-2.02	-0.1	14.95	2.02247	87.166	10.1	18.5	0.3	30.9	11.6	931
2019-12-11_15:00:00	2019-12-12 01:00:01	2.24	60.1	22.97	0.34	0	0	287.48	-1.93	-0.49	14.33	1.99123	75.7545	11.2	19	0.6	317.2	12.6	492
2019-12-11_16:00:00	2019-12-12 02:00:01	3.05	63.08	23.78	0.38	0	0	286.95	-1.89	-0.78	13.8	2.04463	67.5743	13.2	17	0.5	134.6	14.9	385
2019-12-11_17:00:00	2019-12-12 03:00:01	3.39	62.11	23.09	0.35	0	0	286.6	-1.31	-0.66	13.45	1.46687	63.2604	16.7	16.1	0.7	330	17.8	517
2019-12-11_18:00:00	2019-12-12 04:00:01	3.05	56.56	21.1	0.27	0	0	286.54	0.15	-1.21	13.39	1.21926	352.933	11.6	14.7	0.7	334.7	13.5	888
2019-12-11_19:00:00	2019-12-12 05:00:01	2.55	49.87	19.21	0.23	0	0	286.86	1.56	-2.29	13.71	2.77087	325.736	10.4	13.6	0.3	350.3	12.3	782
2019-12-11_20:00:00	2019-12-12 06:00:01	2.11	44.31	17.88	0.23	0	0	291.18	2.87	-3.06	18.03	4.19529	316.835	15.1	14	0.9	120.7	17.3	506
2019-12-11_21:00:00	2019-12-12 07:00:01	1.72	38.41	16.29	0.23	0	0	293.25	4.29	-3.69	20.1	5.65864	310.7	14.4	17.9	1.2	116.7	18.6	474
2019-12-11_22:00:00	2019-12-12 08:00:01	1.5	34.88	15.4	0.24	0	0	294.73	5.09	-2.86	21.58	5.83847	299.331	11.9	21.7	0.7	234.1	17.2	395
2019-12-11_23:00:00	2019-12-12 09:00:01	1.38	33.11	15.12	0.26	0	0	296.05	5.32	-1.05	22.9	5.42263	281.165	15.9	24.3	3.2	292.8	20.2	419
2019-12-12_00:00:00	2019-12-12 10:00:01	1.22	30.76	14.68	0.28	0	0	297.23	5.08	-0.29	24.08	5.08827	273.267	15.9	25.5	3.8	299.5	21.2	401
2019-12-12_01:00:00	2019-12-12 11:00:01	1.04	27.35	13.47	0.27	0	0	298.28	5.28	-0.03	25.13	5.28009	270.326	15.2	26.3	3.8	304.2	21	412
2019-12-12_02:00:00	2019-12-12 12:00:01	0.99	26.09	12.89	0.26	0	0	299.13	5.79	-0.18	25.98	5.7928	271.781	13	27.6	3.5	289.1	20.4	423
2019-12-12_03:00:00	2019-12-12 13:00:01	0.94	25.72	12.8	0.27	0	0	299.87	5.96	0.13	26.72	5.96142	268.75	12.6	28.8	3.6	289.8	22.9	418
2019-12-12_04:00:00	2019-12-12 14:00:01	0.77	23.91	12.08	0.25	0	0	300.29	6.15	1.38	27.14	6.30293	257.353	10.5	30.1	3.7	291.6	23.7	513
2019-12-12_05:00:00	2019-12-12 15:00:01	0.69	24.63	12.39	0.25	0	0	300.26	5.34	2.23	27.11	5.78692	247.334	9.5	30.6	3.5	286.3	24	1099
2019-12-12_06:00:00	2019-12-12 16:00:01	0.48	19.59	9.94	0.21	0	0	300	3.03	3.83	26.85	4.88363	218.348	12.5	30.4	2.7	300.1	27.5	1281
2019-12-12_07:00:00	2019-12-12 17:00:01	0.53	28.24	11.31	0.12	0	0	296.79	-1.58	4.94	23.64	5.18652	162.264	42.9	24.3	5.5	135.8	62.7	818
2019-12-12_08:00:00	2019-12-12 18:00:01	0.67	39.65	14.46	0.09	0	0	293.69	-4.51	3.43	20.54	5.66613	127.254	104.2	20.3	5.6	135.5	131	611
2019-12-12_09:00:00	2019-12-12 19:00:01	0.71	40.53	14.92	0.1	0	0	291.77	-3.51	0.65	18.62	3.56968	100.491	79.5	18.6	4	120.3	91.8	790
2019-12-12_10:00:00	2019-12-12 20:00:01	0.71	43	15.78	0.09	0	0	290.52	-3.33	-0.59	17.37	3.38186	79.9529	64.4	18.2	3.7	120.8	69.9	711
2019-12-12_11:00:00	2019-12-12 21:00:01	0.72	42.83	15.9	0.09	0	0	290.96	-3.73	-1.17	17.81	3.90919	72.5849	44.3	17.9	4.4	123.9	47.4	707
2019-12-12_12:00:00	2019-12-12 22:00:01	0.75	42.46	16.07	0.1	0	0	290.73	-3.39	-2.32	17.58	4.10786	55.6137	36.8	17.3	4.3	123.2	38.6	589
2019-12-12_13:00:00	2019-12-12 23:00:01	0.75	41.79	16.08	0.11	0	0	290.29	-2.9	-2.77	17.14	4.01035	46.3135	28.2	17.2	3.1	120.2	29.6	505
2019-12-12_14:00:00	2019-12-13 00:00:01	0.75	41.15	16.04	0.12	0	0	289.89	-2.11	-2.21	16.74	3.05552	43.6741	29.1	17.2	1.9	114.1	31.7	565
2019-12-12_15:00:00	2019-12-13 01:00:01	0.77	41.04	16.15	0.12	0	0	289.2	-1.76	-2.24	16.05	2.84872	38.1573	30.1	17.3	2	119.3	34.3	934
2019-12-12_16:00:00	2019-12-13 02:00:01	0.82	40.94	16.26	0.12	0	0	288.49	-1.46	-1.09	15.34	1.822	53.256	30.9	17.3	2.4	120.5	34.4	2983
2019-12-12_17:00:00	2019-12-13 03:00:01	0.84	41.11	16.3	0.12	0	0	287.82	-2.01	-0.26	14.67	2.02675	82.6297	25.2	17.1	2.4	121.6	27.6	2030
2019-12-12_18:00:00	2019-12-13 04:00:01	0.93	40.75	16.48	0.13	0	0	287.31	-1.82	-0.89	14.16	2.02596	63.941	21.2	17	2.7	119.6	22.6	1527
2019-12-12_19:00:00	2019-12-13 05:00:01	1.01	40.27	16.65	0.14	0	0	286.91	-1.85	-1.33	13.76	2.27846	54.287	21.2	16.5	2.5	120.6	22.5	1147
2019-12-12_20:00:00	2019-12-13 06:00:01	1.05	39.74	16.74	0.14	0	0	289.35	-1.72	-2.63	16.2	3.1425	33.1845	13.2	16.3	3.2	122.6	14.4	910
2019-12-12_21:00:00	2019-12-13 07:00:01	1.04	38.1	16.46	0.15	0	0	291.36	-0.77	-2.25	18.21	2.37811	18.8922	5.8	16	3.3	121.6	7.5	596
2019-12-12_22:00:00	2019-12-13 08:00:01	0.96	35.82	15.95	0.15	0	0	292.85	0.58	-0.58	19.7	0.820244	315	7.5	16.2	2.8	118.5	9.5	574
2019-12-12_23:00:00	2019-12-13 09:00:01	0.88	33.96	15.44	0.16	0	0	293.66	0.99	1.01	20.51	1.41428	224.427	9.6	16.8	3.5	122.3	11.7	557
2019-12-13_00:00:00	2019-12-13 10:00:01	0.79	31.08	14.2	0.15	0	0	294.74	1.31	2.58	21.59	2.89353	206.919	11.5	18.8	3.7	124.3	13.6	507
2019-12-13_01:00:00	2019-12-13 11:00:01	0.59	24.3	11.46	0.13	0	0	296.52	2.32	2.96	23.37	3.76085	218.089	15.2	21.4	3.9	125.6	18	488
2019-12-13_02:00:00	2019-12-13 12:00:01	0.66	27.33	12.46	0.14	0	0	295.8	0.33	3.56	22.65	3.57526	185.296	12.6	21.7	5.3	132.4	16.3	394
2019-12-13_03:00:00	2019-12-13 13:00:01	0.68	27.89	12.55	0.13	0	0	295.56	-0.27	3.83	22.41	3.83951	175.967	17.3	20.8	4.4	124.7	21.2	368
2019-12-13_04:00:00	2019-12-13 14:00:01	0.63	29.07	12.69	0.12	0	0	294.99	-1.57	4.23	21.84	4.51196	159.637	22.9	19.8	4.9	127.5	26.8	261
2019-12-13_05:00:00	2019-12-13 15:00:01	0.44	29.65	13.05	0.11	0	0	293.79	-3.67	2.89	20.64	4.6713	128.219	30.1	22.1	3.1	120	34.2	150
2019-12-13_06:00:00	2019-12-13 16:00:01	0.4	30.17	13.56	0.11	0	0	292.87	-3.84	2.23	19.72	4.44055	120.145	17.9	21.2	1.4	44	22.4	151
2019-12-13_07:00:00	2019-12-13 17:00:01	0.45	30.79	13.85	0.12	0	0	292.38	-3.94	1.26	19.23	4.13657	107.734	15.4	21.8	2.6	107.4	18.6	216
2019-12-13_08:00:00	2019-12-13 18:00:01	0.29	29.63	13.89	0.11	0	0	290.96	-4.55	-0.17	17.81	4.55317	87.8604	23.9	18.2	5.3	125.5	27.8	157
2019-12-13_09:00:00	2019-12-13 19:00:01	0.17	27.66	13.56	0.11	0	0	289.09	-3.76	1.19	15.94	3.94382	107.562	44.9	16.1	4.1	122	49	192
2019-12-13_10:00:00	2019-12-13 20:00:01	0.15	27.04	13.38	0.11	0	0	288.85	-3.39	0.48	15.7	3.42381	98.059	42.8	15.9	2.9	119.5	46.5	248
2019-12-13_11:00:00	2019-12-13 21:00:01	0.16	27.25	13.48	0.12	0	0	289.12	-3.32	-0.37	15.97	3.34055	83.641	29.8	15.7	3.2	121.4	32	318
2019-12-13_12:00:00	2019-12-13 22:00:01	0.18	27.32	13.54	0.13	0	0	289.07	-2.61	-0.8	15.92	2.72985	72.9591	19.7	15.7	2.9	122.5	21.3	430
2019-12-13_13:00:00	2019-12-13 23:00:01	0.22	27.61	13.71	0.14	0	0	287.53	-1.81	-0.98	14.38	2.05828	61.5674	14.3	15.6	3	121.4	15.9	619
2019-12-13_14:00:00	2019-12-14 00:00:01	0.26	27.53	13.72	0.15	0	0	288.06	-1.87	-2.02	14.91	2.75269	42.7919	14.4	15.5	2.2	119.5	16	445
2019-12-13_15:00:00	2019-12-14 01:00:01	0.25	26.44	13.39	0.15	0	0	286.5	-1.56	-2.09	13.35	2.60801	36.7382	13.5	15.4	1.9	119.3	15	579
2019-12-13_16:00:00	2019-12-14 02:00:01	0.26	25.48	13.05	0.15	0	0	285.75	-0.88	-2.33	12.6	2.49064	20.6908	14.2	15.4	2	122.4	15.7	427
2019-12-13_17:00:00	2019-12-14 03:00:01	0.26	24.39	12.59	0.15	0	0	285.41	-0.2	-2.58	12.26	2.58774	4.43275	13.5	15.5	1.6	125.3	15.2	655
2019-12-13_18:00:00	2019-12-14 04:00:01	0.26	23.47	12.18	0.14	0	0	285.03	0.2	-2.61	11.88	2.61765	355.618	14.4	14.8	0.7	112.2	16.3	857
2019-12-13_19:00:00	2019-12-14 05:00:01	0.27	23.14	12	0.14	0	0	284.51	0.87	-2.36	11.36	2.51525	339.764	12.1	14.8	1.3	120.5	14.8	590
2019-12-13_20:00:00	2019-12-14 06:00:01	0.28	23.37	12.07	0.14	0	0	287.7	1.52	-0.69	14.55	1.66928	294.416	13.5	15.1	1.4	116.6	16.9	416
2019-12-13_21:00:00	2019-12-14 07:00:01	0.29	23.54	12.07	0.13	0	0	290.2	2.42	1.15	17.05	2.67935	244.583	15	15.5	1.1	108.2	17.7	272
2019-12-13_22:00:00	2019-12-14 08:00:01	0.24	21.65	11.26	0.12	0	0	291.81	2.74	1.65	18.66	3.19845	238.944	16.2	17.1	0.9	125	18.6	269
2019-12-13_23:00:00	2019-12-14 09:00:01	0.21	20	10.48	0.11	0	0	293.15	2.81	1.64	20	3.25357	239.731	18.1	20	0.5	202.2	21.9	246
2019-12-14_00:00:00	2019-12-14 10:00:01	0.16	15.97	8.48	0.09	0	0	294.71	3.49	1.7	21.56	3.88202	244.029	21.1	22.8	1.2	267.9	26.3	251
2019-12-14_01:00:00	2019-12-14 11:00:01	0.13	13.93	7.42	0.08	0	0	295.84	3.78	1.81	22.69	4.191	244.413	29.2	25.2	2.1	282.4	36.5	267
2019-12-14_02:00:00	2019-12-14 12:00:01	0.12	12.71	6.76	0.07	0	0	296.87	3.83	2.12	23.72	4.37759	241.034	24	26.5	3.3	265.5	32.4	262
2019-12-14_03:00:00	2019-12-14 13:00:01	0.08	9.84	5.24	0.05	0	0	297.74	3.76	2.75	24.59	4.65834	233.819	17.3	27.1	3.6	252.3	24.6	250
2019-12-14_04:00:00	2019-12-14 14:00:01	0.05	7.11	3.85	0.04	0	0	298.42	3.63	3.05	25.27	4.74124	229.962	22.8	27.8	3.1	257	30.5	294
2019-12-14_05:00:00	2019-12-14 15:00:01	0.02	5.45	3.01	0.03	0	0	298.8	3.32	3.49	25.65	4.8169	223.57	22.3	28.5	3.3	237.5	28.5	303
2019-12-14_06:00:00	2019-12-14 16:00:01	0.01	4.22	2.31	0.03	0	0	298.81	3.22	3.59	25.66	4.8225	221.89	16.1	28.6	2.6	254	22.2	328
2019-12-14_07:00:00	2019-12-14 17:00:01	0.01	4.44	2.46	0.04	0	0	298.31	1.83	4.17	25.16	4.55388	203.694	11.4	28.5	3.4	267.8	18.5	379
2019-12-14_08:00:00	2019-12-14 18:00:01	0.09	13.84	7.51	0.1	0	0	295.47	-2.46	3.94	22.32	4.64491	148.021	10.1	27.8	2.9	264	17.7	481
2019-12-14_09:00:00	2019-12-14 19:00:01	0.17	21.19	10.9	0.12	0	0	292.16	-2.59	0.33	19.01	2.61094	97.261	11.8	26.2	1.9	261.5	19.7	669
2019-12-14_10:00:00	2019-12-14 20:00:01	0.23	25.83	13.66	0.25	0	0	290.68	-1.43	-1.99	17.53	2.45051	35.7009	15.9	24	0.8	284.6	26	798
2019-12-14_11:00:00	2019-12-14 21:00:01	0.28	29.23	16.29	0.38	0	0	290.21	-1.13	-3.7	17.06	3.86871	16.983	16.5	21.5	0.8	94.2	26.4	576
2019-12-14_12:00:00	2019-12-14 22:00:01	0.27	26.19	14.25	0.28	0	0	289.84	-0.92	-4.86	16.69	4.94631	10.7194	24.7	19.8	1.7	120.2	34.1	630
2019-12-14_13:00:00	2019-12-14 23:00:01	0.25	22.75	12.41	0.23	0	0	289.33	0.02	-4.8	16.18	4.80004	359.761	31.1	19	0.8	107.9	38.7	701
2019-12-14_14:00:00	2019-12-15 00:00:01	0.18	16.87	9.57	0.18	0	0	289.02	1.25	-4.08	15.87	4.26719	342.966	31	18.3	1	106.1	38.2	494
2019-12-14_15:00:00	2019-12-15 01:00:01	0.09	10.31	6.26	0.14	0	0	288.38	2.39	-2.17	15.23	3.22816	312.238	28.4	17.2	0.5	101.7	36.1	343
2019-12-14_16:00:00	2019-12-15 02:00:01	0.06	12.8	9.31	0.36	0	0	287.79	2.96	-0.94	14.64	3.10567	287.618	25.3	16.8	0.7	98.8	33.5	287
2019-12-14_17:00:00	2019-12-15 03:00:01	0.04	20.01	16.38	0.8	0	0	287.16	2.79	-0.33	14.01	2.80945	276.746	25.8	15.8	0.7	102.8	34	283
2019-12-14_18:00:00	2019-12-15 04:00:01	0.03	27.74	23.69	1.23	0	0	286.54	2.46	0.39	13.39	2.49072	260.991	26.3	15	0.9	118.5	33.6	395
2019-12-14_19:00:00	2019-12-15 05:00:01	0.02	34.64	30.22	1.6	0	0	286.01	2.07	-0.05	12.86	2.0706	271.384	23.8	14.7	0.6	112.6	30.3	707
2019-12-14_20:00:00	2019-12-15 06:00:01	0.01	36.23	31.89	1.69	0	0	290.03	1.45	-0.92	16.88	1.71724	302.394	26	14.6	0.5	117.8	32.5	2562
2019-12-14_21:00:00	2019-12-15 07:00:01	0.01	32.35	28.68	1.52	0	0	293.31	1.32	0.53	20.16	1.42243	248.124	20.9	16.5	1.6	120.1	28.4	1221
2019-12-14_22:00:00	2019-12-15 08:00:01	0	12.64	11.15	0.58	0	0	294.86	2.64	1.29	21.71	2.93832	243.958	24.7	19.7	2.1	131.3	31.5	845
2019-12-14_23:00:00	2019-12-15 09:00:01	0	7.75	6.76	0.34	0	0	296.08	4.08	1.37	22.93	4.30387	251.439	26.5	23.5	1	206.8	34.4	679
2019-12-15_00:00:00	2019-12-15 10:00:01	0	6.95	6	0.3	0	0	297.11	5.07	1.41	23.96	5.26241	254.458	24.2	26.6	2.2	291.2	33.3	716
2019-12-15_01:00:00	2019-12-15 11:00:01	0	0.01	0	0	0	0	299.83	4.83	-0.47	26.68	4.85281	275.558	20.1	28	3.7	271	29.7	696
2019-12-15_02:00:00	2019-12-15 12:00:01	0	0.06	0.06	0	0	0	300.74	6.16	0.41	27.59	6.17363	266.192	31.8	28.7	3.9	272.9	41.4	777
2019-12-15_03:00:00	2019-12-15 13:00:01	0	0.15	0.14	0.01	0	0	301.14	5.93	0.81	27.99	5.98506	262.222	28.8	29.6	3.7	280.9	38.3	718
2019-12-15_04:00:00	2019-12-15 14:00:01	0	0.73	0.67	0.04	0	0	301.75	5.84	1.87	28.6	6.13209	252.245	39.7	30.2	4.1	259.1	50.7	764
2019-12-15_05:00:00	2019-12-15 15:00:01	0	0.74	0.68	0.04	0	0	301.91	5.88	2.68	28.76	6.46195	245.497	44.3	30.3	4.3	271.1	53	848
2019-12-15_06:00:00	2019-12-15 16:00:01	0	0.45	0.41	0.03	0	0	301.72	5.59	3.3	28.57	6.49139	239.445	58.9	30.2	4.2	272.7	69.1	958
2019-12-15_07:00:00	2019-12-15 17:00:01	0	0.39	0.35	0.02	0	0	301.14	4.9	2.88	27.99	5.6837	239.555	48.2	29.7	3.6	263.2	58.2	716
2019-12-15_08:00:00	2019-12-15 18:00:01	0	1.99	1.8	0.12	0	0	299.9	2.26	2.59	26.75	3.4374	221.107	21.9	28.6	3.2	260.8	30.4	785
2019-12-15_09:00:00	2019-12-15 19:00:01	0	13.25	12.02	0.79	0	0	293.86	-0.92	2.01	20.71	2.21054	155.406	16.2	27.6	2.4	280.3	25.3	516
2019-12-15_10:00:00	2019-12-15 20:00:01	0	16.25	14.76	0.95	0	0	292.02	-0.64	0.65	18.87	0.912195	135.444	12.7	25	1.1	305.5	22	740
2019-12-15_11:00:00	2019-12-15 21:00:01	0	13.46	12.22	0.78	0	0	291.02	0.88	1.02	17.87	1.34715	220.786	14.2	21	1.2	306.8	26.2	634
2019-12-15_12:00:00	2019-12-15 22:00:01	0	9.83	8.89	0.56	0	0	290.06	2.28	-0.04	16.91	2.28035	271.005	13.7	20	1	319.4	27.4	860
2019-12-15_13:00:00	2019-12-15 23:00:01	0	5.3	4.77	0.3	0	0	289.88	2.67	-0.74	16.73	2.77065	285.491	20.4	18.1	1.1	309.7	31.3	1057
2019-12-15_14:00:00	2019-12-16 00:00:01	0	3.74	3.37	0.21	0	0	289.43	2.83	-1.09	16.28	3.03266	291.065	19.6	17.3	1.4	312.5	29.7	2099
2019-12-15_15:00:00	2019-12-16 01:00:01	0	1.82	1.62	0.1	0	0	289.12	3.17	-1.33	15.97	3.4377	292.761	15.9	16.5	1.2	306.3	24.2	1663
2019-12-15_16:00:00	2019-12-16 02:00:01	0	1.32	1.16	0.07	0	0	289.21	3.59	-1.38	16.06	3.8461	291.027	16.6	16.5	1.1	308.1	24.3	1033
2019-12-15_17:00:00	2019-12-16 03:00:01	0	1.19	1.05	0.06	0	0	288.62	3.67	-1.17	15.47	3.85199	287.682	13.1	14.5	1.1	323.1	20.6	527
2019-12-15_18:00:00	2019-12-16 04:00:01	0	0.98	0.85	0.05	0	0	287.66	3.53	-1.21	14.51	3.73162	288.921	15.2	14	1.3	314.2	24	417
2019-12-15_19:00:00	2019-12-16 05:00:01	0	0.97	0.84	0.05	0	0	287.08	3.48	-1.35	13.93	3.73268	291.203	21.4	13.8	1.3	316.8	31.6	786
2019-12-15_20:00:00	2019-12-16 06:00:01	0	0.88	0.75	0.05	0	0	292.08	3.34	0.36	18.93	3.35935	263.848	30.4	14.1	1	307.9	43	954
2019-12-15_21:00:00	2019-12-16 07:00:01	0	0.6	0.5	0.03	0	0	294.91	4.34	2.81	21.76	5.17027	237.078	28	20.4	1.6	280.5	43.9	864
2019-12-15_22:00:00	2019-12-16 08:00:01	0	0.2	0.17	0.01	0	0	296.85	5.92	4.23	23.7	7.27594	234.453	10.4	24.6	4	257.6	38.1	882
2019-12-15_23:00:00	2019-12-16 09:00:01	0	0.13	0.1	0.01	0	0	297.88	5.82	4.69	24.73	7.47452	231.137	5.6	26.4	4.3	244.4	37.2	722
2019-12-16_00:00:00	2019-12-16 10:00:01	0	0.11	0.09	0.01	0	0	298.79	5.46	4.67	25.64	7.18474	229.459	5.1	27.9	3.8	261.2	29.8	678
2019-12-16_01:00:00	2019-12-16 11:00:01	0	0.11	0.09	0	0	0	299.64	4.75	4.8	26.49	6.75296	224.7	5.1	29.2	4	256.7	24.1	478
2019-12-16_02:00:00	2019-12-16 12:00:01	0	0.3	0.25	0.02	0	0	300.23	4.08	5.02	27.08	6.46891	219.102	7.6	30.1	3.7	245.7	24.4	580
2019-12-16_03:00:00	2019-12-16 13:00:01	0	0.24	0.2	0.01	0	0	300.82	3.66	4.97	27.67	6.17224	216.369	4.6	30.4	4.4	225.9	20.8	961
2019-12-16_04:00:00	2019-12-16 14:00:01	0	0.71	0.63	0.04	0	0	301.46	3.27	4.63	28.31	5.66832	215.232	3	31	3.9	226.3	20.6	1450
2019-12-16_05:00:00	2019-12-16 15:00:01	0	1.9	1.7	0.11	0	0	301.97	2.84	4.6	28.82	5.40607	211.691	1	31.2	3.4	232	15.7	2132
2019-12-16_06:00:00	2019-12-16 16:00:01	0	8.96	8.03	0.52	0	0	301.9	0.65	5.22	28.75	5.26031	187.098	3.8	31.5	3.7	207.9	18.3	1154
2019-12-16_07:00:00	2019-12-16 17:00:01	0	71.35	54.22	3.17	0.01	0	295.4	-7.6	3.24	22.25	8.26182	113.089	5.4	31	3.6	197.8	19.7	276
2019-12-16_08:00:00	2019-12-16 18:00:01	0	66.7	47.15	2.6	0.01	0	292.31	-6.06	3.08	19.16	6.79779	116.942	121.7	26	5	126.1	150.7	228
2019-12-16_09:00:00	2019-12-16 19:00:01	0	74.53	53.67	2.98	0.01	0	289.45	-4.88	2.35	16.3	5.41635	115.713	374.5	22.3	3.8	118.4	428.4	183
2019-12-16_10:00:00	2019-12-16 20:00:01	0	62.53	43.83	2.35	0	0	288.36	-5.37	2.27	15.21	5.83008	112.915	245.8	19.6	2.2	104.6	282.8	138
2019-12-16_11:00:00	2019-12-16 21:00:01	0	42.4	26.33	1.24	0	0	287.55	-5.43	1.98	14.4	5.77973	110.034	69.7	17.4	1.7	98.9	89.7	135
2019-12-16_12:00:00	2019-12-16 22:00:01	0	27.51	13.43	0.42	0	0	286.68	-5.31	2.05	13.53	5.69198	111.11	44.8	16.5	1.6	104.7	60.9
2019-12-16_13:00:00	2019-12-16 23:00:01	0	24.15	11.72	0.34	0	0	285.99	-5.19	1.83	12.84	5.50318	109.423	63.5	15.8	1.2	97.3	79.3	184
2019-12-16_14:00:00	2019-12-17 00:00:01	0	19.98	9.82	0.27	0	0	285.05	-4.66	1.41	11.9	4.86864	106.834	70.6	15	1.6	106.5	86.5	218
2019-12-16_15:00:00	2019-12-17 01:00:01	0	17.82	9.36	0.27	0	0	283.72	-3.32	0.62	10.57	3.3774	100.578	75.3	14.2	1.5	109.8	88.8	285
2019-12-16_16:00:00	2019-12-17 02:00:01	0	18.1	10.29	0.33	0	0	283.18	-3.16	0.6	10.03	3.21646	100.751	70.2	13.9	1.5	107.6	82.6	514
2019-12-16_17:00:00	2019-12-17 03:00:01	0	19.74	11.8	0.42	0	0	282.55	-2.64	0.09	9.4	2.64153	91.9524	80.4	13.1	2.3	119.8	92.7	12449
2019-12-16_18:00:00	2019-12-17 04:00:01	0	21.33	13.21	0.49	0	0	281.92	-2.43	-0.38	8.77	2.45953	81.1123	79.1	12.5	0.9	111	90.2	9789
2019-12-16_19:00:00	2019-12-17 05:00:01	0	22.02	13.81	0.51	0	0	281.62	-2.57	-0.6	8.47	2.63911	76.8591	113.4	11.5	0.9	122.8	125.9	3764
2019-12-16_20:00:00	2019-12-17 06:00:01	0	21.89	13.6	0.5	0	0	284.21	-3.18	0.43	11.06	3.20894	97.7007	137.7	12	0.8	102.7	151.1	1078
2019-12-16_21:00:00	2019-12-17 07:00:01	0	20.01	12.23	0.44	0	0	286.65	-3.5	1.28	13.5	3.72671	110.088	103	13.6	1.6	108	115.2	1490
2019-12-16_22:00:00	2019-12-17 08:00:01	0	19.14	12.05	0.46	0	0	289.1	-3.99	2.17	15.95	4.54192	118.54	110.1	15.4	2.9	123.7	122.3	1841
2019-12-16_23:00:00	2019-12-17 09:00:01	0	18.99	12.24	0.5	0	0	291.23	-4.28	2.28	18.08	4.84941	118.045	108.9	18	3.4	121.8	120.7	2002
2019-12-17_00:00:00	2019-12-17 10:00:01	0	15.64	9.98	0.4	0	0	293.25	-4.18	2.4	20.1	4.82	119.863	84.6	20.4	3.6	122.4	94.1	1978
2019-12-17_01:00:00	2019-12-17 11:00:01	0	14.98	9.7	0.41	0	0	294.78	-4.01	2.61	21.63	4.78458	123.059	68.7	22.8	3.4	121.8	77.6	2044
2019-12-17_02:00:00	2019-12-17 12:00:01	0	23.95	17.41	0.9	0	0	295.95	-3.98	2.88	22.8	4.91272	125.89	111.8	24.4	3.9	126	121	1861
2019-12-17_03:00:00	2019-12-17 13:00:01	0	33.96	26.17	1.46	0	0	296.53	-4.23	3.41	23.38	5.43332	128.874	234.1	25.7	3.4	128.3	246.1	2524
2019-12-17_04:00:00	2019-12-17 14:00:01	0	45.19	35.8	2.06	0	0	296.65	-4.56	3.24	23.5	5.59385	125.395	207	26.6	3	130.6	220.2	3415
2019-12-17_05:00:00	2019-12-17 15:00:01	0	55.75	44.33	2.57	0.01	0	296.61	-4.78	3.27	23.46	5.79149	124.376	94.5	27	3.5	121.2	106.3	3205
2019-12-17_06:00:00	2019-12-17 16:00:01	0	72.52	56.63	3.26	0.01	0	295.85	-5.26	3.38	22.7	6.25236	122.724	120.7	26.8	3.6	123.2	134.5	2261
2019-12-17_07:00:00	2019-12-17 17:00:01	0	70.48	52.05	2.84	0.01	0	294.34	-5.59	3.04	21.19	6.36315	118.538	129.8	26.2	3.2	120.5	144	2280
2019-12-17_08:00:00	2019-12-17 18:00:01	0	65.24	46.53	2.45	0.01	0	291.95	-5.69	2.9	18.8	6.3864	117.006	177.9	24.8	3.7	123.5	194.9	1560
2019-12-17_09:00:00	2019-12-17 19:00:01	0	58.95	41.19	2.1	0	0	288.97	-4.41	2.07	15.82	4.87165	115.145	189.6	22.2	3.2	118	209.7	955
2019-12-17_10:00:00	2019-12-17 20:00:01	0	46.45	30.45	1.42	0	0	287.28	-3.98	1.01	14.13	4.10615	104.239	62.6	19.6	1.9	111.6	80.1	1293
2019-12-17_11:00:00	2019-12-17 21:00:01	0	37.05	22.04	0.88	0	0	286.19	-3.24	0.16	13.04	3.24395	92.827	39.8	17.9	1.7	114.3	53.8	2993
2019-12-17_12:00:00	2019-12-17 22:00:01	0	27.53	14.35	0.41	0	0	285.37	-2.86	-0.48	12.22	2.9	80.4729	55.8	16.4	2.2	117.1	69	5766
2019-12-17_13:00:00	2019-12-17 23:00:01	0	21.34	10.28	0.2	0	0	284.55	-2.64	-0.83	11.4	2.7674	72.5473	66.6	14.9	1.9	120.3	79.6	2177
2019-12-17_14:00:00	2019-12-18 00:00:01	0	18.08	8.57	0.14	0	0	284.09	-2.78	-1.29	10.94	3.06472	65.1075	73.6	14	2.3	115.4	86.6	2375
2019-12-17_15:00:00	2019-12-18 01:00:01	0	15.9	7.55	0.12	0	0	283.74	-3	-1.63	10.59	3.41422	61.4834	69.7	13.6	2.3	113.2	81.4	2770
2019-12-17_16:00:00	2019-12-18 02:00:01	0	14.37	6.91	0.11	0	0	283.39	-3.28	-1.43	10.24	3.57817	66.4441	82.9	13.7	1.1	94.2	94	3812
2019-12-17_17:00:00	2019-12-18 03:00:01	0	13.7	6.78	0.12	0	0	282.95	-3.34	-1.61	9.8	3.70779	64.2644	115.8	14.1	1.3	86	128.7	5517
2019-12-17_18:00:00	2019-12-18 04:00:01	0	11.64	5.7	0.08	0	0	282.54	-3.11	-2.08	9.39	3.74146	56.2251	113.4	13.8	1.4	100.6	125.3	3035
2019-12-17_19:00:00	2019-12-18 05:00:02	0	9.32	4.51	0.05	0	0	282.35	-2.96	-2.54	9.2	3.90041	49.367	115.5	13.2	1.7	110.6	127.4	711
2019-12-17_20:00:00	2019-12-18 06:00:02	0	7.87	3.84	0.04	0	0	286.15	-3.3	-1.66	13	3.694	63.2963	126.3	12.9	2.1	121.5	138.9	1062
2019-12-17_21:00:00	2019-12-18 07:00:02	0	6.28	3.03	0.02	0	0	289.53	-4.25	-0.86	16.38	4.33614	78.5606	131	13.9	2.7	123.7	144.4	1470
2019-12-17_22:00:00	2019-12-18 08:00:02	0	4.95	2.39	0.02	0	0	292.12	-4.72	0.27	18.97	4.72772	93.2738	115.2	16.6	3.1	123.2	126.2	1794
2019-12-17_23:00:00	2019-12-18 09:00:02	0	5.65	2.99	0.06	0	0	293.99	-4.73	1.12	20.84	4.86079	103.321	77.1	19.5	3.1	125.1	85.2	1748
2019-12-18_00:00:00	2019-12-18 10:00:02	0	6.88	3.91	0.11	0	0	295.59	-4.59	1.66	22.44	4.88095	109.883	51.1	22.3	3.2	128.4	57.8	1880
2019-12-18_01:00:00	2019-12-18 11:00:02	0	7.01	4.03	0.12	0	0	296.98	-4.19	2.09	23.83	4.68233	116.51	31.1	24.8	2.9	134.7	37.3	2414
2019-12-18_02:00:00	2019-12-18 12:00:02	0	9.86	6.62	0.3	0	0	298.15	-3.99	2.52	25	4.71916	122.276	23.3	27	2.7	137.5	28.6	2605
2019-12-18_03:00:00	2019-12-18 13:00:02	0	17.72	13.64	0.75	0	0	298.86	-4.16	2.99	25.71	5.12306	125.707	16.2	28.3	2.8	146.5	21.6	2456
2019-12-18_04:00:00	2019-12-18 14:00:02	0	28.79	23.76	1.42	0	0	299.32	-4.22	2.99	26.17	5.1719	125.319	30.8	29.2	2.9	126.5	36.4	3025
2019-12-18_05:00:00	2019-12-18 15:00:02	0	45.83	38.98	2.39	0.01	0	299.37	-4.54	3.04	26.22	5.46381	123.806	90.8	29.1	3.6	138.9	98.8	3049
2019-12-18_06:00:00	2019-12-18 16:00:02	0	64.15	54.99	3.4	0.01	0	298.8	-4.66	2.96	25.65	5.52062	122.423	167.6	29.1	3.3	122.3	178.2	2722
2019-12-18_07:00:00	2019-12-18 17:00:02	0	67.33	56.93	3.46	0.01	0	297.74	-4.39	2.56	24.59	5.0819	120.248	389	28	3.7	122.6	410.5	1772
2019-12-18_08:00:00	2019-12-18 18:00:02	0	68.19	56.7	3.39	0.01	0	296.01	-3.86	1.32	22.86	4.07946	108.879	444.8	27.2	2.9	120.7	478.1	1114
2019-12-18_09:00:00	2019-12-18 19:00:02	0	73.01	60.06	3.55	0.01	0	291.97	-2.45	0.12	18.82	2.45294	92.8039	201.9	25.3	1.9	119.4	224.9	669
2019-12-18_10:00:00	2019-12-18 20:00:02	0	41.1	30.42	1.6	0	0	289.74	-1.89	-1.52	16.59	2.42539	51.1927	141.8	22.7	1.2	119.5	157	446
2019-12-18_11:00:00	2019-12-18 21:00:02	0	17.77	8.97	0.21	0	0	288.39	-1.86	-3.14	15.24	3.64955	30.6408	191.5	21	0.7	106.3	207.5	308
2019-12-18_12:00:00	2019-12-18 22:00:02	0	15.75	8.17	0.19	0	0	287.85	-1.73	-4.2	14.7	4.54235	22.3871	228	19.6	0.8	108.3	245.4	368
2019-12-18_13:00:00	2019-12-18 23:00:02	0.01	16.22	10.14	0.37	0	0	287.78	-1.34	-4.13	14.63	4.34195	17.976	220.4	18.1	0.6	108.5	237.3	1097
2019-12-18_14:00:00	2019-12-19 00:00:02	0.03	15.45	10.34	0.42	0	0	288.03	-1.54	-3.39	14.88	3.7234	24.4313	194	16.6	0.4	94.5	210.4	2459
2019-12-18_15:00:00	2019-12-19 01:00:02	0.06	13.48	9.39	0.4	0	0	287.66	-1.45	-3.25	14.51	3.55879	24.0443	164.3	15	0.3	358.3	178.4	5838
2019-12-18_16:00:00	2019-12-19 02:00:02	0.11	10.7	7.62	0.33	0	0	287.69	-1.26	-3.35	14.54	3.57912	20.6123	102.1	13.7	1	316.6	115.4	10004
2019-12-18_17:00:00	2019-12-19 03:00:02	0.15	8.37	5.94	0.26	0	0	287.66	-0.9	-3.44	14.51	3.55578	14.6616	66.1	12.9	1.3	315.8	79.6	5345
2019-12-18_18:00:00	2019-12-19 04:00:02	0.21	6.57	4.45	0.19	0	0	287.43	0.29	-3.38	14.28	3.39242	355.096	55	12.2	0.9	319	65.4	2971
2019-12-18_19:00:00	2019-12-19 05:00:02	0.25	6.36	4.28	0.18	0	0	287.22	2.25	-2.33	14.07	3.23904	316.001	49.5	11.8	0.8	326.5	59	3800
2019-12-18_20:00:00	2019-12-19 06:00:02	0.2	10.68	7.95	0.36	0	0	292.09	2.45	-1.08	18.94	2.67748	293.789	50	11.6	1.1	314.8	60.3	5302
2019-12-18_21:00:00	2019-12-19 07:00:02	0.13	23.99	19.56	0.95	0	0	295.55	2.81	0.82	22.4	2.9272	253.732	48	15	1.2	305.5	62.2	5336
2019-12-18_22:00:00	2019-12-19 08:00:02	0.05	41.65	35.13	1.73	0	0	297.17	2.64	2.41	24.02	3.57459	227.608	54.3	21.3	1.4	302.4	71.6	4955
2019-12-18_23:00:00	2019-12-19 09:00:02	0.14	31.16	25.9	1.25	0	0	299.01	1.99	2.51	25.86	3.20315	218.408	77	25.3	2.1	264.7	93.5	4159
2019-12-19_00:00:00	2019-12-19 10:00:02	0.26	20.63	16.65	0.78	0	0	300.52	1.27	2.44	27.37	2.75073	207.497	104.3	26.9	2.1	240.1	119.5	3593
2019-12-19_01:00:00	2019-12-19 11:00:02	0.31	16.83	13.43	0.62	0	0	301.68	0.57	2.42	28.53	2.48622	193.254	106.8	28.8	2.3	218.8	123.1	2080
2019-12-19_02:00:00	2019-12-19 12:00:02	0.34	18.14	14.79	0.69	0	0	302.65	-0.11	2.59	29.5	2.59233	177.568	124.6	30.6	2	238.8	141.8	1621
2019-12-19_03:00:00	2019-12-19 13:00:02	0.35	21.34	17.87	0.85	0	0	303.46	-1.08	2.61	30.31	2.82462	157.52	102.5	32	1.1	275.3	117.7	1345
2019-12-19_04:00:00	2019-12-19 14:00:02	0.35	26.7	22.86	1.16	0	0	304.07	-1.88	2.55	30.92	3.16811	143.6	78.8	33.1	1.8	249	92.9	1400
2019-12-19_05:00:00	2019-12-19 15:00:02	0.35	35.99	31.37	1.71	0	0	304.34	-2.52	2.17	31.19	3.32555	130.732	84.9	33.3	1.6	225.9	98	1627
2019-12-19_06:00:00	2019-12-19 16:00:02	0.35	48.95	43.22	2.48	0.01	0	304.22	-2.87	1.84	31.07	3.40918	122.664	91.6	33.2	2.4	218.9	105.1	1846
2019-12-19_07:00:00	2019-12-19 17:00:02	0.35	100.41	90.2	5.6	0.01	0.01	303.19	-4.46	0.83	30.04	4.53657	100.542	99.9	33.2	2.4	212	118.1	1773
2019-12-19_08:00:00	2019-12-19 18:00:02	0.22	12.09	9.04	0.42	0	0	299.81	-1.74	-2.7	26.66	3.2121	32.7996	94.4	32.3	3.4	193.6	111.8	3193
2019-12-19_09:00:00	2019-12-19 19:00:02	0.23	19.91	16.06	0.9	0	0	296.96	-1.75	-3.82	23.81	4.20177	24.6133	84.6	30.5	1.9	196	100.8	2947
2019-12-19_10:00:00	2019-12-19 20:00:02	0.24	22.5	18.5	1.01	0	0	295.92	-1.42	-4.5	22.77	4.71873	17.5135	92.1	28.9	1.5	150.7	111.2	3186
2019-12-19_11:00:00	2019-12-19 21:00:02	0.25	22.02	18.2	0.95	0	0	294.89	-0.58	-4.15	21.74	4.19033	7.95615	98.3	26.7	0.3	108.6	119.8	3055
2019-12-19_12:00:00	2019-12-19 22:00:02	0.27	28.87	24.64	1.3	0	0	294.03	0.21	-3.77	20.88	3.77584	356.812	125.5	23.3	0.7	327.4	145.8	2235
2019-12-19_13:00:00	2019-12-19 23:00:02	0.28	34.03	29.45	1.56	0	0	293.93	1.3	-3.43	20.78	3.66809	339.243	128.3	21.1	0.8	317.9	151.4	2482
2019-12-19_14:00:00	2019-12-20 00:00:02	0.26	34.53	29.81	1.57	0	0	294.25	2.41	-3.42	21.1	4.18384	324.829	114.9	19.6	0.5	339.2	138.6	2904
2019-12-19_15:00:00	2019-12-20 01:00:02	0.25	65	57.7	3.26	0.01	0	294.38	3.09	-3.34	21.23	4.55013	317.227	128	18.5	1	315.1	150.8	3380
2019-12-19_16:00:00	2019-12-20 02:00:02	0.25	75.45	67.3	3.79	0.01	0	294.07	3.04	-3.61	20.92	4.7195	319.899	122.9	17.5	1	322	145.8	3889
2019-12-19_17:00:00	2019-12-20 03:00:02	0.23	57.09	50.2	2.72	0.01	0	293.31	2.73	-3.62	20.16	4.53402	322.979	126.2	16.6	0.7	314	146.3	3171
2019-12-19_18:00:00	2019-12-20 04:00:02	0.2	47.17	40.81	2.11	0	0	292.76	2.76	-3.33	19.61	4.3251	320.347	133.4	16.1	0.7	326.3	150.3	3371
2019-12-19_19:00:00	2019-12-20 05:00:02	0.19	43.61	37.38	1.87	0	0	292.47	3.07	-2.93	19.32	4.2438	313.663	142.7	15.1	0.1	11.3	156.2	3290
2019-12-19_20:00:00	2019-12-20 06:00:02	0.19	41.38	35.19	1.71	0	0	295.68	3.32	-1.84	22.53	3.79579	298.996	143	15.1	0.9	318.7	156.3	3677
2019-12-19_21:00:00	2019-12-20 07:00:02	0.19	39.6	33.42	1.6	0	0	298.98	4.68	-0.57	25.83	4.71458	276.944	141.8	16.7	0.9	310	158.2	4828
2019-12-19_22:00:00	2019-12-20 08:00:02	0.2	34.85	28.86	1.33	0	0	300.56	5.22	1.06	27.41	5.32654	258.521	154.5	20.3	0.3	288.9	171.8	3754
2019-12-19_23:00:00	2019-12-20 09:00:02	0.2	29.98	24.22	1.07	0	0	301.64	5.34	2.3	28.49	5.81426	246.698	160.6	24.9	1.2	118.9	184.8	4099
2019-12-20_00:00:00	2019-12-20 10:00:02	0.21	26.47	20.83	0.89	0	0	302.65	4.79	2.67	29.5	5.48389	240.864	175.4	29.1	0.7	148.4	201.1	4082
2019-12-20_01:00:00	2019-12-20 11:00:02	0.29	21.46	15.94	0.63	0	0	304.09	3.97	2.83	30.94	4.87543	234.517	169.8	31.5	0.7	176.4	188.5	3859
2019-12-20_02:00:00	2019-12-20 12:00:02	0.42	18.31	12.36	0.44	0	0	305.24	3.5	3.28	32.09	4.79671	226.858	136.2	32.7	1	234.5	156.5	4020
2019-12-20_03:00:00	2019-12-20 13:00:02	0.78	19.52	11.86	0.41	0	0	306.19	3.13	3.99	33.04	5.07119	218.113	116.8	34	2.1	190.2	136.6	4204
2019-12-20_04:00:00	2019-12-20 14:00:02	1.18	21.22	11.65	0.39	0	0	306.8	2.81	5.18	33.65	5.89309	208.478	97.6	34.9	2.4	215.4	120.6	4377
2019-12-20_05:00:00	2019-12-20 15:00:02	1.22	21.62	12.05	0.43	0	0	306.85	2.48	5.68	33.7	6.19781	203.587	148.3	32.8	4.5	137	175.5	4603
2019-12-20_06:00:00	2019-12-20 16:00:02	1.17	22.48	13.56	0.54	0	0	306.5	0.55	5.19	33.35	5.21906	186.049	468.2	30.6	4.7	122.9	507.8	5448
2019-12-20_07:00:00	2019-12-20 17:00:02	0.78	63.84	52.07	2.95	0.01	0	303.82	-3.34	1.93	30.67	3.85753	120.021	456.2	28.9	3.4	118.6	493.4	6897
2019-12-20_08:00:00	2019-12-20 18:00:02	0.7	64.34	52.88	2.91	0.01	0	302.66	-1.67	-2.17	29.51	2.73821	37.5815	308.3	27.8	2	108.8	338.6	6353
2019-12-20_09:00:00	2019-12-20 19:00:02	0.52	47.55	38.77	1.85	0	0	298.23	0.02	-2.84	25.08	2.84007	359.597	170.7	26.2	1.8	116.3	194.6	5813
2019-12-20_10:00:00	2019-12-20 20:00:02	0.28	55.23	46.57	2.21	0	0	296.11	-0.17	-2.85	22.96	2.85507	3.41368	108.8	24.2	1.6	118.3	132.5	4653
2019-12-20_11:00:00	2019-12-20 21:00:02	0.25	95.07	82.74	4.44	0.01	0.01	294.32	-0.14	-1.78	21.17	1.7855	4.49723	91	22.7	1.6	117.1	113.3	4127
2019-12-20_12:00:00	2019-12-20 22:00:02	0.35	109.48	96.51	5.36	0.01	0.01	294.13	0.63	-3.07	20.98	3.13398	348.403	77.1	21.5	1.8	126.8	98.2	3459
2019-12-20_13:00:00	2019-12-20 23:00:02	0.29	81.11	71.48	3.95	0.01	0.01	295.09	1.47	-3.47	21.94	3.76853	337.041	80.9	20.4	1.3	115.8	101.8	3392
2019-12-20_14:00:00	2019-12-21 00:00:02	0.23	44.67	38.12	2	0	0	293.45	0.61	-3.15	20.3	3.20852	349.04	80	19	1	114.8	101.2	9046
2019-12-20_15:00:00	2019-12-21 01:00:02	0.26	36.68	30.66	1.51	0	0	293.04	1.05	-2.91	19.89	3.09364	340.159	82.7	18.2	0.4	83.1	103.8	14161
2019-12-20_16:00:00	2019-12-21 02:00:02	0.27	32.72	26.91	1.25	0	0	293.8	2	-3.45	20.65	3.98779	329.899	81.7	16.6	0.5	330.1	102.1	9619
2019-12-20_17:00:00	2019-12-21 03:00:02	0.27	25.21	19.74	0.87	0	0	295.63	3.49	-4.79	22.48	5.92657	323.923	82.4	15.2	1	311.5	102.5	5700
2019-12-20_18:00:00	2019-12-21 04:00:02	0.26	22.58	17.4	0.73	0	0	296.09	4.61	-5.35	22.94	7.0622	319.249	94.9	14.9	0.5	326.7	116	2971
2019-12-20_19:00:00	2019-12-21 05:00:02	0.26	19.08	14.36	0.58	0	0	295.5	5.22	-5.56	22.35	7.6264	316.807	104.5	14.2	0.7	318.5	125.8	2481
2019-12-20_20:00:00	2019-12-21 06:00:02	0.26	22	16.84	0.72	0	0	297.35	6.69	-4.95	24.2	8.32218	306.498	105.4	14.1	0.4	316.7	126.4	2109
2019-12-20_21:00:00	2019-12-21 07:00:02	0.25	21.51	16.21	0.68	0	0	299.51	7.76	-4.14	26.36	8.79529	298.08	111.1	17.1	0.4	135.6	132.1	2150
2019-12-20_22:00:00	2019-12-21 08:00:02	0.23	21.94	16.4	0.64	0	0	301.43	8.71	-3.19	28.28	9.27579	290.115	115.8	23.7	1.6	288.6	137.4	2270
2019-12-20_23:00:00	2019-12-21 09:00:02	0.22	26.18	20.32	0.78	0	0	303.12	9.04	-1.67	29.97	9.19296	280.467	94.4	28.3	3.8	288.3	113.8	2222
2019-12-21_00:00:00	2019-12-21 10:00:02	0.28	28.51	22.63	0.89	0	0	303.98	9.38	-0.43	30.83	9.38985	272.625	68.4	29.9	3.6	281.5	87.4	2601
2019-12-21_01:00:00	2019-12-21 11:00:02	0.43	24.19	18	0.68	0	0	305.25	8.41	-0.12	32.1	8.41086	270.817	75.6	31.7	3.5	262.6	97.6	2446
2019-12-21_02:00:00	2019-12-21 12:00:02	1.51	27.54	16.44	0.54	0	0	306.42	7.87	1.67	33.27	8.04523	258.02	81	33.4	3.5	263.7	104.8	2884
2019-12-21_03:00:00	2019-12-21 13:00:02	3.07	35.5	17.74	0.51	0	0	307.5	6.95	2.05	34.35	7.24603	253.566	72.6	34.9	3.2	223.7	95.3	2753
2019-12-21_04:00:00	2019-12-21 14:00:02	5.85	46.17	16.25	0.28	0	0	308.44	5.91	4.66	35.29	7.5262	231.744	54.3	35.7	3.5	188.2	75.9	2850
2019-12-21_05:00:00	2019-12-21 15:00:02	5.92	46.15	16.48	0.29	0	0	308.49	6.05	2.73	35.34	6.63742	245.713	46.4	36.1	2.8	213.3	66.1	3033
2019-12-21_06:00:00	2019-12-21 16:00:02	5.94	48.08	17.72	0.35	0	0	308.39	6.29	2.14	35.24	6.64407	251.211	54.2	35.7	3.9	185.4	75.4	3565
2019-12-21_07:00:00	2019-12-21 17:00:02	6.56	52.72	18.88	0.37	0	0	308.02	5.85	0.71	34.87	5.89293	263.08	85.7	34.9	3.8	186.1	109.5	3695
2019-12-21_08:00:00	2019-12-21 18:00:02	10.5	70.77	19.33	0.16	0	0	304.46	4.94	5.45	31.31	7.35568	222.19	91.7	34.2	3	199.7	116.2	2218
2019-12-21_09:00:00	2019-12-21 19:00:02	11.28	76.89	21.7	0.24	0	0	301.8	1.86	2.62	28.65	3.2131	215.372	87	32.6	1	168.9	111.2	2281
2019-12-21_10:00:00	2019-12-21 20:00:02	9.22	134.25	81.84	4.33	0.01	0.01	300.17	-4.19	3.39	27.02	5.38964	128.975	137	29.3	0.3	84.7	160.3	2489
2019-12-21_11:00:00	2019-12-21 21:00:02	11.11	85.81	30.27	0.79	0	0	298.11	-1	1.23	24.96	1.58521	140.888	158.5	26.2	0.6	329.8	183	2436
2019-12-21_12:00:00	2019-12-21 22:00:02	10.74	93.32	38.54	1.33	0	0	298.79	0.78	-1.26	25.64	1.48189	328.241	142.5	24.3	0.8	316	171	2043
2019-12-21_13:00:00	2019-12-21 23:00:02	10.52	100.39	45.84	1.79	0	0	297.2	2.02	-2.14	24.05	2.94279	316.652	129.6	22.4	0.9	319.8	159	1839
2019-12-21_14:00:00	2019-12-22 00:00:02	10.56	109.85	53.67	2.24	0	0	296.84	2.48	-1.72	23.69	3.01808	304.743	111.5	21.4	0.7	311.6	138.2	1792
2019-12-21_15:00:00	2019-12-22 01:00:02	11.51	120.2	57.84	2.38	0.01	0	296.6	2.77	-1.61	23.45	3.2039	300.166	116.8	20.5	0.8	330.7	141.5	2206
2019-12-21_16:00:00	2019-12-22 02:00:02	13.17	124.29	54.05	1.99	0	0	296.18	2.65	-1.25	23.03	2.93002	295.253	123	19.3	0.3	321.7	145.3	2773
2019-12-21_17:00:00	2019-12-22 03:00:02	14.32	125.15	50.11	1.64	0	0	295.94	2.17	-1.11	22.79	2.43742	297.091	120.3	19.3	1.1	327.3	141.9	2481
2019-12-21_18:00:00	2019-12-22 04:00:02	14.81	126.19	49.2	1.53	0	0	295.43	2.59	-0.83	22.28	2.71974	287.769	110.7	19	0.7	111.8	130	3362
2019-12-21_19:00:00	2019-12-22 05:00:02	0	6.86	6.28	0.36	0	0	291.77	3.77	-4.05	18.62	5.53312	317.051	114	18.8	0.3	76.4	132	5086
2019-12-21_20:00:00	2019-12-22 06:00:02	0	4.58	4.18	0.24	0	0	294.42	4.3	-3.65	21.27	5.64026	310.326	117.9	17.8	0.3	340.5	137.4	5422
2019-12-21_21:00:00	2019-12-22 07:00:02	0	3.75	3.41	0.19	0	0	296.86	5.34	-3.19	23.71	6.22027	300.853	118.3	20.5	1	126.9	141.8	4501
2019-12-21_22:00:00	2019-12-22 08:00:02	0	2.38	2.16	0.12	0	0	298.94	5.85	-1.99	25.79	6.17921	288.787	135	23.5	2.6	124.6	163.5	3213
2019-12-21_23:00:00	2019-12-22 09:00:02	0	1.73	1.56	0.09	0	0	300.29	5.87	-0.13	27.14	5.87144	271.269	158	25.9	2.8	120.5	183.1	3180
2019-12-22_00:00:00	2019-12-22 10:00:02	0	1.24	1.12	0.06	0	0	301.36	5.33	1.43	28.21	5.5185	254.982	203.1	26.5	3.9	126.7	228.3	3299
2019-12-22_01:00:00	2019-12-22 11:00:02	0	1.07	0.96	0.05	0	0	302.21	4.85	2.26	29.06	5.35071	245.015	270.7	26.8	4	126.7	295.8	3196
2019-12-22_02:00:00	2019-12-22 12:00:02	0	1.08	0.97	0.05	0	0	303.02	4.61	2.33	29.87	5.16537	243.187	290.8	28.3	3.7	125.6	316.2	3163
2019-12-22_03:00:00	2019-12-22 13:00:02	0	1.03	0.93	0.05	0	0	303.83	4.38	2.6	30.68	5.09356	239.306	278.1	29.1	4.5	125.2	304.1	2888
2019-12-22_04:00:00	2019-12-22 14:00:02	0	1.1	1	0.06	0	0	303.82	2.68	3.7	30.67	4.56863	215.917	234.2	28.8	4.9	121.8	258.3	3954
2019-12-22_05:00:00	2019-12-22 15:00:02	0	1.32	1.2	0.07	0	0	302.33	-2	4.28	29.18	4.72424	154.954	193.8	26.8	4.9	120.7	211.8	8577
2019-12-22_06:00:00	2019-12-22 16:00:02	0	2.67	2.43	0.14	0	0	301.61	-3.33	1.4	28.46	3.61233	112.803	150.7	25.2	4.6	119.1	163.8	5235
2019-12-22_07:00:00	2019-12-22 17:00:02	0	3.73	3.38	0.18	0	0	300.18	-3.87	-2.1	27.03	4.40306	61.5143	151.3	23.5	4.5	119.9	165.6	4044
2019-12-22_08:00:00	2019-12-22 18:00:02	0	2.44	2.22	0.12	0	0	300.2	-2.42	-0.81	27.05	2.55196	71.4942	120.3	22.2	2.9	112.1	134.8	5039
2019-12-22_09:00:00	2019-12-22 19:00:02	0	7.92	6.89	0.35	0	0	296.86	-2.24	1.05	23.71	2.47388	115.115	76.8	20.3	3.7	118.1	90.8	5881
2019-12-22_10:00:00	2019-12-22 20:00:02	0	7.51	6.7	0.35	0	0	295.77	-2.67	-1.37	22.62	3.00097	62.8374	46.7	19.1	2.7	114.4	61.8	6117
2019-12-22_11:00:00	2019-12-22 21:00:02	0	7.85	5.9	0.27	0	0	294.91	-2.84	-5.79	21.76	6.44901	26.1281	38.4	18.7	3.5	117	54.8	5725
2019-12-22_12:00:00	2019-12-22 22:00:02	0	8.06	5.83	0.25	0	0	294.28	-2.13	-6.22	21.13	6.5746	18.9035	39.7	17.7	3.3	116.5	55	5068
2019-12-22_13:00:00	2019-12-22 23:00:02	0	8.18	6.15	0.28	0	0	293.6	-1.53	-5.33	20.45	5.54525	16.0164	42.4	16.7	2.9	114.6	57.5	4372
2019-12-22_14:00:00	2019-12-23 00:00:02	0	10.76	8.39	0.39	0	0	293.09	-1.43	0.03	19.94	1.43031	91.2017	40.4	16.1	2.4	114.5	51.6	3287
2019-12-22_15:00:00	2019-12-23 01:00:02	0	14.21	10.8	0.46	0	0	291.06	-2.89	1.56	17.91	3.28416	118.36	43.6	15.5	3.2	120.8	54.1	3345
2019-12-22_16:00:00	2019-12-23 02:00:02	0	12.57	10.43	0.52	0	0	292.28	-2.17	-3.53	19.13	4.14365	31.5804	39.9	15.4	3.3	119.4	49.1	3225
2019-12-22_17:00:00	2019-12-23 03:00:02	0	14.13	12.23	0.64	0	0	290.75	-1.18	-2.08	17.6	2.3914	29.5667	20.4	15.4	3	119.2	25.9	2082
2019-12-22_18:00:00	2019-12-23 04:00:02	0	15.33	12.89	0.64	0	0	290.18	-2.13	0.18	17.03	2.13759	94.8303	21.9	15.5	2.5	118.9	26.3	1276
2019-12-22_19:00:00	2019-12-23 05:00:02	0	15.34	12.61	0.59	0	0	289.02	-1.98	1.17	15.87	2.29985	120.579	27	15.3	2.6	119.1	31.6	923
2019-12-22_20:00:00	2019-12-23 06:00:02	0	14.95	12.77	0.63	0	0	290.28	-1.05	-0.11	17.13	1.05575	84.0195	31.7	15.3	2.5	119.4	37.3	964
2019-12-22_21:00:00	2019-12-23 07:00:02	0	12.15	10.57	0.54	0	0	294.84	0.49	-2.41	21.69	2.45931	348.507	27.5	15.6	2.5	119	33.9	868
2019-12-22_22:00:00	2019-12-23 08:00:02	0	4.95	4.04	0.19	0	0	297.9	1.92	-4.61	24.75	4.99385	337.389	26.5	17	3.2	121.8	32.9	842
2019-12-22_23:00:00	2019-12-23 09:00:02	0	4.45	3.63	0.16	0	0	300.28	3.57	-4.93	27.13	6.08685	324.09	28.2	20	2.8	122.3	35.3	1034
2019-12-23_00:00:00	2019-12-23 10:00:02	0	3.52	2.91	0.13	0	0	302.08	5.42	-4.62	28.93	7.12185	310.444	31.3	23.2	2.6	131.3	39.7	1215
2019-12-23_01:00:00	2019-12-23 11:00:02	0	2.43	1.9	0.08	0	0	301.31	5.2	-3.22	28.16	6.11624	301.767	38.5	25.8	1.7	123.9	49.4	560
2019-12-23_02:00:00	2019-12-23 12:00:02	0.01	3.14	2.37	0.1	0	0	301.44	5.48	-1.4	28.29	5.65601	284.331	42.5	27.6	1.4	175.3	55.1	449
2019-12-23_03:00:00	2019-12-23 13:00:02	0.04	3.94	2.86	0.12	0	0	300.95	3.61	0.05	27.8	3.61035	269.206	49	28.9	1.4	264.5	63.3	534
2019-12-23_04:00:00	2019-12-23 14:00:02	0.02	4.47	3.4	0.14	0	0	300.68	1.46	3.04	27.53	3.37242	205.653	48.8	28.9	2.9	143.3	64.1	769
2019-12-23_05:00:00	2019-12-23 15:00:02	0.01	7.98	5.82	0.22	0	0	297.88	-1.99	3.15	24.73	3.72594	147.717	57.2	27.5	3.7	124.6	72.1	666
2019-12-23_06:00:00	2019-12-23 16:00:02	0.02	8.8	6.31	0.24	0	0	297.41	-3.03	2.37	24.26	3.84679	128.032	72.2	26.5	3.5	122.5	87.9	675
2019-12-23_07:00:00	2019-12-23 17:00:02	0.03	7.96	5.84	0.24	0	0	298.11	-2.86	1.3	24.96	3.14159	114.444	133.7	25.5	3.5	123.1	150.7	695
2019-12-23_08:00:00	2019-12-23 18:00:02	0.02	11.78	8.79	0.39	0	0	296.17	-4.44	1.73	23.02	4.76513	111.288	123.2	23.1	2.6	122.7	143.1	701
2019-12-23_09:00:00	2019-12-23 19:00:02	0.01	12.8	9.55	0.42	0	0	293.79	-3.95	0.76	20.64	4.02245	100.891	137	21.5	2.6	120.3	153.5	917
2019-12-23_10:00:00	2019-12-23 20:00:02	0	11.46	8.3	0.35	0	0	292.83	-3.14	-0.01	19.68	3.14002	89.8177	102.7	19.7	3	121.4	115.4	1185
2019-12-23_11:00:00	2019-12-23 21:00:02	0	10.11	6.61	0.24	0	0	293.18	-3.87	-1.04	20.03	4.00731	74.9582	69	18.9	2.1	118.7	77.3	1315
2019-12-23_12:00:00	2019-12-23 22:00:02	0	9.51	5.74	0.17	0	0	292.42	-4.09	-2.71	19.27	4.90634	56.472	44.9	18.8	2	122.4	51.2
2019-12-23_13:00:00	2019-12-23 23:00:02	0	12.01	6.12	0.14	0	0	292.03	-4.61	-6.08	18.88	7.6301	37.1704	46	18.6	1.6	132.8	51.8	1511
2019-12-23_14:00:00	2019-12-24 00:00:02	0	15.32	7.67	0.16	0	0	291.3	-4.08	-6.98	18.15	8.08497	30.3075	58.8	17.9	1.5	118.6	67	1464
2019-12-23_15:00:00	2019-12-24 01:00:02	0	17.56	9.08	0.2	0	0	290.92	-3.81	-6.55	17.77	7.57751	30.1858	65.1	18.3	1.6	130.7	74.9	2976
2019-12-23_16:00:00	2019-12-24 02:00:02	0.01	16.06	8.28	0.18	0	0	290.61	-3.29	-6.77	17.46	7.52708	25.9183	63.3	18.1	1.5	121.5	70.3	2537
2019-12-23_17:00:00	2019-12-24 03:00:02	0.02	13.98	7.25	0.17	0	0	290.62	-2.89	-6.3	17.47	6.93124	24.6424	62.2	18.3	2.2	137	68.3	3125
2019-12-23_18:00:00	2019-12-24 04:00:02	0.02	12.92	6.77	0.16	0	0	290.61	-2.16	-6.49	17.46	6.84001	18.4086	53.9	17.9	1.7	118.2	58.9	2800
2019-12-23_19:00:00	2019-12-24 05:00:02	0	2	1.7	0.09	0	0	291.04	0.63	-4.25	17.89	4.29644	351.568	51.8	17.9	1.1	126.3	57.4	2395
2019-12-23_20:00:00	2019-12-24 06:00:02	0	2.88	2.56	0.14	0	0	292.8	3.41	-4.52	19.65	5.66202	322.968	42.4	18	0.7	140.8	45.4	1147
2019-12-23_21:00:00	2019-12-24 07:00:02	0	3.13	2.81	0.15	0	0	293.88	3.89	-4.79	20.73	6.17059	320.92	23.9	18.4	0.4	122.1	25.5	1012
2019-12-23_22:00:00	2019-12-24 08:00:02	0	1.59	1.44	0.08	0	0	296.52	4.44	-4.13	23.37	6.06387	312.928	16.1	19	0.8	89.2	17.7	1181
2019-12-23_23:00:00	2019-12-24 09:00:02	0	0.82	0.74	0.04	0	0	298.35	3.8	-1.58	25.2	4.11539	292.577	4.9	20.8	1.5	102.6	6.6	2117
2019-12-24_00:00:00	2019-12-24 10:00:02	0	0.6	0.55	0.03	0	0	299.67	3.79	0.52	26.52	3.82551	262.188	5.4	23.6	0.2	103.9	7.9	1337
2019-12-24_01:00:00	2019-12-24 11:00:02	0	0.6	0.55	0.03	0	0	299.87	2.71	1.27	26.72	2.99282	244.891	13.1	24.8	0.9	226.1	18.1	1676
2019-12-24_02:00:00	2019-12-24 12:00:02	0	0.72	0.66	0.03	0	0	298.88	0.64	3.74	25.73	3.79436	189.711	23.8	25.8	1.2	187.6	32.4	1352
2019-12-24_03:00:00	2019-12-24 13:00:02	0	1.23	1.06	0.05	0	0	296.12	-2.04	3.6	22.97	4.13783	150.461	26.1	20.1	4.3	132.5	34.3	1125
2019-12-24_04:00:00	2019-12-24 14:00:02	0	1.33	1.13	0.06	0	0	293.85	-2.23	-0.6	20.7	2.30931	74.9409	10.3	18.3	0.5	58.5	14.3	1061
2019-12-24_05:00:00	2019-12-24 15:00:02	0	1.6	1.18	0.05	0	0	294.51	-1.06	1.15	21.36	1.564	137.332	11.9	21.1	2.1	113.9	14	888
2019-12-24_06:00:00	2019-12-24 16:00:02	0	2.29	1.25	0.04	0	0	293.98	-5.64	4.82	20.83	7.41903	130.517	15.7	21	1.5	99.3	18	787
2019-12-24_07:00:00	2019-12-24 17:00:02	0	1.58	1.15	0.05	0	0	293.6	-7	-0.68	20.45	7.03295	84.4517	19.2	19.6	4.2	124	21.9	431
2019-12-24_08:00:00	2019-12-24 18:00:02	0	1.63	1.03	0.04	0	0	290.11	-6.07	-5.44	16.96	8.15098	48.1331	16.2	19.1	3.5	118.8	18.1	224
2019-12-24_09:00:00	2019-12-24 19:00:02	0	2.96	2.53	0.12	0	0	289.66	-4.77	-6.19	16.51	7.81467	37.6179	14.8	19	2.9	118.8	16.5	362
2019-12-24_10:00:00	2019-12-24 20:00:02	0	3.1	2.64	0.12	0	0	289.72	-4.53	-3.63	16.57	5.80498	51.2941	17	18.7	2.2	116.1	18.6	635
2019-12-24_11:00:00	2019-12-24 21:00:02	0	2.7	2.1	0.09	0	0	289.35	-4.91	-3.33	16.2	5.93271	55.8547	18	18.3	2	115	20.5	800
2019-12-24_12:00:00	2019-12-24 22:00:02	0	3.08	2.7	0.12	0	0	288.24	-3.36	-1.72	15.09	3.77465	62.892	18.1	18.2	1.9	115.1	21.3	786
2019-12-24_13:00:00	2019-12-24 23:00:02	0	3.27	2.95	0.14	0	0	287.91	-3.6	-2.42	14.76	4.33779	56.0903	17.8	18.2	1.8	109.8	20.8	794
2019-12-24_14:00:00	2019-12-25 00:00:02	0	3.05	2.74	0.12	0	0	287.53	-2.77	0.08	14.38	2.77115	91.6541	13.4	17.7	2.5	119	15.5	642
2019-12-24_15:00:00	2019-12-25 01:00:02	0	2.87	2.49	0.11	0	0	286.2	-2.93	0.17	13.05	2.93493	93.3205	14.9	17.1	2	119.3	17.2	703
2019-12-24_16:00:00	2019-12-25 02:00:02	0	2.56	2.18	0.09	0	0	285.85	-3.03	0.07	12.7	3.03081	91.3233	12.1	17	2.3	117.9	14.7	661
2019-12-24_17:00:00	2019-12-25 03:00:02	0	2.15	1.75	0.07	0	0	285.83	-3.67	0.47	12.68	3.69997	97.2977	9.9	16.9	3	120	12.4	494
2019-12-24_18:00:00	2019-12-25 04:00:02	0	1.86	1.49	0.06	0	0	285.61	-3.91	0.39	12.46	3.9294	95.6959	8.9	16.7	3	119.6	11.4	501
2019-12-24_19:00:00	2019-12-25 05:00:02	0	1.75	1.35	0.05	0	0	285.35	-3.76	0.06	12.2	3.76048	90.9141	7.3	16.5	2.9	120.1	9.5	564
2019-12-24_20:00:00	2019-12-25 06:00:02	0	1.72	1.31	0.05	0	0	287.04	-4.08	-0.39	13.89	4.0986	84.5399	9.6	16.5	2.6	119.9	11.5	614
2019-12-24_21:00:00	2019-12-25 07:00:02	0	1.93	1.54	0.06	0	0	289.54	-5.06	0.15	16.39	5.06222	91.6978	8.8	16.9	2.8	119.4	10.5	585
2019-12-24_22:00:00	2019-12-25 08:00:02	0	2.72	1.89	0.07	0	0	291.22	-5.26	0.96	18.07	5.34689	100.343	9	17.8	3.3	117.5	11	458
2019-12-24_23:00:00	2019-12-25 09:00:02	0	3.53	2.06	0.06	0	0	292.75	-5.14	1.37	19.6	5.31945	104.924	14.5	18.6	3.6	118.4	16.9	416
2019-12-25_00:00:00	2019-12-25 10:00:02	0	4.22	2.04	0.04	0	0	293.99	-5.14	2.21	20.84	5.59497	113.266	15.1	19	3.9	120.6	17.6	394
2019-12-25_01:00:00	2019-12-25 11:00:02	0	4.89	1.96	0.03	0	0	293.62	-5.9	2.86	20.47	6.55665	115.861	12.9	19.6	3.5	122	15.2	412
2019-12-25_02:00:00	2019-12-25 12:00:02	0	5.69	2.09	0.02	0	0	293.47	-5.65	3.04	20.32	6.41593	118.282	9.3	19.7	3.6	122.7	10.9	380
2019-12-25_03:00:00	2019-12-25 13:00:02	0	7.23	2.46	0.01	0	0	293.68	-5.98	3.09	20.53	6.73116	117.326	6	20.9	4.5	127.6	6.7	342
2019-12-25_04:00:00	2019-12-25 14:00:02	0	13.22	4.43	0	0	0	293.31	-5.96	3.76	20.16	7.04693	122.247	2.5	21.9	5.1	122.9	3.1	274
2019-12-25_05:00:00	2019-12-25 15:00:02	0	16.7	5.64	0	0	0	292.6	-6.49	3.68	19.45	7.46073	119.554	6.5	22	5.1	124.2	7.6	300
2019-12-25_06:00:00	2019-12-25 16:00:02	0	12.03	4.1	0	0	0	292.7	-6.42	2.19	19.55	6.78325	108.835	6.6	22.1	4.7	122.7	7.1	298
2019-12-25_07:00:00	2019-12-25 17:00:02	0	15.88	5.21	0	0	0	291.27	-6.2	1.13	18.12	6.30213	100.329	9.7	21.4	4.4	119.7	10.5	341
2019-12-25_08:00:00	2019-12-25 18:00:02	0	19.16	6.31	0	0	0	290.59	-5.89	-0.42	17.44	5.90496	85.9214	13.5	20.7	4.1	121	14.4	459
2019-12-25_09:00:00	2019-12-25 19:00:02	0	18.6	6.22	0	0	0	289.27	-4.78	-0.42	16.12	4.79842	84.9787	12.4	19.1	3.9	119	13.7	436
2019-12-25_10:00:00	2019-12-25 20:00:02	0	15.6	5.43	0	0	0	288.13	-4.52	-1	14.98	4.6293	77.525	9.2	17.3	2.8	119.8	11.2	296
2019-12-25_11:00:00	2019-12-25 21:00:02	0	14.17	5.05	0	0	0	287.43	-4.26	-0.84	14.28	4.34203	78.8455	5.9	16.7	2.8	120.3	8.2	149
2019-12-25_12:00:00	2019-12-25 22:00:02	0	12.4	4.53	0	0	0	288.08	-5.08	-1.44	14.93	5.28015	74.174	6.4	16.4	2.8	119.4	7.1	76
2019-12-25_13:00:00	2019-12-25 23:00:02	0	12.58	4.57	0	0	0	288.02	-4.99	-1.27	14.87	5.14908	75.721	4.3	16.7	2.3	117.8	4.9	156
2019-12-25_14:00:00	2019-12-26 00:00:02	0	11.83	4.42	0	0	0	287.69	-4.56	-1.22	14.54	4.72038	75.0218	3.2	16.6	2.7	120.9	3.9	108
2019-12-25_15:00:00	2019-12-26 01:00:02	0	10.59	4.17	0.01	0	0	285.92	-3.62	-0.79	12.77	3.7052	77.6894	4.9	16.4	2.8	121	5.9	144
2019-12-25_16:00:00	2019-12-26 02:00:02	0	9.13	3.9	0.01	0	0	285.4	-3.53	-1.24	12.25	3.74146	70.645	5.4	16.1	1.1	107.1	6.3	231
2019-12-25_17:00:00	2019-12-26 03:00:02	0	9.09	4.01	0.02	0	0	284.88	-3.21	-1.08	11.73	3.38681	71.4047	4.8	15.3	1.2	119.9	5.7	275
2019-12-25_18:00:00	2019-12-26 04:00:02	0	9.28	4.18	0.02	0	0	285.07	-3.53	-1.05	11.92	3.68285	73.435	3.1	14.9	1.7	118.6	4.4	363
2019-12-25_19:00:00	2019-12-26 05:00:02	0	9.61	4.3	0.02	0	0	285.14	-3.75	-0.84	11.99	3.84293	77.3743	3.5	14.4	2.2	121	5.9	224
2019-12-25_20:00:00	2019-12-26 06:00:02	0	9.88	4.36	0.02	0	0	285.32	-3.84	-0.8	12.17	3.92245	78.2319	9.7	14.6	2.7	122.2	13	221
2019-12-25_21:00:00	2019-12-26 07:00:02	0	9.49	4.29	0.03	0	0	286.37	-3.95	-1.01	13.22	4.07708	75.6571	13.2	15.3	2.9	119.7	16.9	236
2019-12-25_22:00:00	2019-12-26 08:00:02	0	8.81	4.09	0.04	0	0	288.48	-4.58	-0.11	15.33	4.58132	88.6243	11.7	17.2	2.4	107.4	15.4	112
2019-12-25_23:00:00	2019-12-26 09:00:02	0	8.45	3.98	0.04	0	0	290.42	-4.96	0.83	17.27	5.02897	99.4996	15.5	19	2.6	116.2	19.2	175
2019-12-26_00:00:00	2019-12-26 10:00:02	0	8.64	4.13	0.06	0	0	292.16	-5.25	2.22	19.01	5.70008	112.921	15	20.7	2.3	114.8	18.9	194
2019-12-26_01:00:00	2019-12-26 11:00:02	0	8.82	5.03	0.12	0	0	293.34	-5.32	3.25	20.19	6.23417	121.421	14.3	21.7	3.2	118.2	18.4	125
2019-12-26_02:00:00	2019-12-26 12:00:02	0	10.89	6.53	0.18	0	0	293.98	-5.41	3.54	20.83	6.46527	123.198	12.5	23	2.6	111.6	16.4	116
2019-12-26_03:00:00	2019-12-26 13:00:02	0	13.08	8.13	0.24	0	0	294.32	-5.37	3.6	21.17	6.46505	123.837	14.3	23.3	4.2	130.9	17.9	198
2019-12-26_04:00:00	2019-12-26 14:00:02	0	13.53	8.78	0.27	0	0	294.51	-5.45	3.46	21.36	6.45555	122.41	14.7	24.1	3.9	124.9	18.7	325
2019-12-26_05:00:00	2019-12-26 15:00:02	0	12.84	8.56	0.27	0	0	294.46	-5.5	3.47	21.31	6.50315	122.248	14.1	24.7	3.6	122.3	17.9	449
2019-12-26_06:00:00	2019-12-26 16:00:03	0	11.55	7.05	0.19	0	0	293.94	-5.66	3.42	20.79	6.61302	121.142	13.4	25.1	3.4	121.6	16.9	519
2019-12-26_07:00:00	2019-12-26 17:00:03	0	9.91	5.21	0.1	0	0	293.02	-5.73	3.13	19.87	6.52915	118.645	18.4	24.9	3.4	125	22.4	527
2019-12-26_08:00:00	2019-12-26 18:00:03	0	8.57	3.72	0.03	0	0	291.54	-5.79	2.61	18.39	6.35108	114.265	20.8	24.5	2.6	112.9	25.2	594
2019-12-26_09:00:00	2019-12-26 19:00:03	0	8.6	3.42	0.01	0	0	289.21	-4.26	1.82	16.06	4.63249	113.133	18.7	22.8	2.2	112.4	23.7	569
2019-12-26_10:00:00	2019-12-26 20:00:03	0	8.96	3.5	0	0	0	287.46	-3.46	0.74	14.31	3.53825	102.072	11.1	20.7	2.1	116.8	16.5	545
2019-12-26_11:00:00	2019-12-26 21:00:03	0	8.4	3.37	0	0	0	286.09	-3.09	-0.76	12.94	3.18209	76.1822	9.5	19	2.1	117.3	14.6	510
2019-12-26_12:00:00	2019-12-26 22:00:03	0	7.17	3.02	0	0	0	285.16	-3.25	-2.03	12.01	3.83189	58.0106	6.5	17.7	1.6	112	11.8	448
2019-12-26_13:00:00	2019-12-26 23:00:03	0	6.96	2.99	0	0	0	284.31	-3.14	-2.51	11.16	4.01991	51.3626	5.9	16.6	1.8	116.9	11	416
2019-12-26_14:00:00	2019-12-27 00:00:03	0	6.8	2.97	0	0	0	283.49	-3.09	-2.77	10.34	4.14982	48.1258	5.8	15.7	1.7	119.3	10.6	396
2019-12-26_15:00:00	2019-12-27 01:00:03	0	6.93	3.04	0	0	0	282.83	-3.12	-2.73	9.68	4.14576	48.8142	4	14.9	1.8	121.3	9.1	498
2019-12-26_16:00:00	2019-12-27 02:00:03	0	7.18	3.1	0	0	0	282.53	-3.36	-2.81	9.38	4.38015	50.0941	4.5	14.2	1.9	120.5	9.4	556
2019-12-26_17:00:00	2019-12-27 03:00:03	0	7.59	3.19	0	0	0	282.47	-3.27	-2.74	9.32	4.2662	50.0398	4.5	13.6	1.2	116.5	8.8	610
2019-12-26_18:00:00	2019-12-27 04:00:03	0	8.39	3.44	0	0	0	282.64	-3.46	-2.38	9.49	4.19952	55.4775	5.1	13	1.2	117.7	9	559
2019-12-26_19:00:00	2019-12-27 05:00:03	0	8.49	3.47	0	0	0	283.15	-3.71	-2.13	10	4.27797	60.139	3.6	12.2	0.9	113.8	7.1	654
2019-12-26_20:00:00	2019-12-27 06:00:03	0	8.21	3.37	0	0	0	284	-3.99	-2.36	10.85	4.6357	59.3967	9.4	12.9	1.4	118.3	12.4	637
2019-12-26_21:00:00	2019-12-27 07:00:03	0	6.84	2.86	0	0	0	286.08	-4.18	-1.9	12.93	4.59156	65.5562	3.9	14.6	1.7	115.3	7.6	335
2019-12-26_22:00:00	2019-12-27 08:00:03	0	5.49	2.29	0	0	0	288.65	-4.49	-1.52	15.5	4.74031	71.2976	5.3	16.8	1.6	99.8	8.7	234
2019-12-26_23:00:00	2019-12-27 09:00:03	0	4.48	1.86	0	0	0	290.76	-4.36	-0.9	17.61	4.45192	78.3368	4.7	18.6	2.6	122.1	8.4	198
2019-12-27_00:00:00	2019-12-27 10:00:03	0	4.47	1.84	0	0	0	292.6	-3.97	-0.19	19.45	3.97454	87.2601	3.4	20.3	2.8	123.2	6.9	210
2019-12-27_01:00:00	2019-12-27 11:00:03	0	4.78	1.94	0	0	0	294.13	-3.55	0.42	20.98	3.57476	96.7471	2.4	21.8	3.6	127	6.2	131
2019-12-27_02:00:00	2019-12-27 12:00:03	0	4.97	1.99	0	0	0	295.44	-3.26	1.09	22.29	3.4374	108.488	3	23.5	2.3	116.8	7.2	116
2019-12-27_03:00:00	2019-12-27 13:00:03	0	5.35	2.11	0	0	0	296.37	-3.5	1.95	23.22	4.00656	119.124	6.8	24.9	3.1	124	10.3	116
2019-12-27_04:00:00	2019-12-27 14:00:03	0	5.91	2.3	0	0	0	296.84	-4.24	2.93	23.69	5.15388	124.646	6.5	25.7	3.5	128.2	9.8	130
2019-12-27_05:00:00	2019-12-27 15:00:03	0	6.5	2.51	0	0	0	296.8	-4.79	3.35	23.65	5.84522	124.968	10.2	26.5	3.4	127.1	14.6	244
2019-12-27_06:00:00	2019-12-27 16:00:03	0	6.82	2.62	0	0	0	296.41	-4.93	3.01	23.26	5.77624	121.406	17.5	26.6	4.1	131.9	21.3	166
2019-12-27_07:00:00	2019-12-27 17:00:03	0	7.48	2.87	0	0	0	295.72	-5.05	1.94	22.57	5.40982	111.015	14.5	26.3	4.3	128.5	18.1	136
2019-12-27_08:00:00	2019-12-27 18:00:03	0	8.43	3.24	0	0	0	294.37	-4.71	0.34	21.22	4.72226	94.1287	16.1	25.5	4.2	123.7	20.2	92
2019-12-27_09:00:00	2019-12-27 19:00:03	0	8.63	3.34	0	0	0	291.54	-3.19	-0.6	18.39	3.24594	79.348	12.8	23.9	2.5	115.5	17.5	70
2019-12-27_10:00:00	2019-12-27 20:00:03	0	8.64	3.35	0	0	0	289.16	-2.61	-1.25	16.01	2.89389	64.4091	6.4	21.2	2	111.6	11.9	81
2019-12-27_11:00:00	2019-12-27 21:00:03	0	8.93	3.46	0	0	0	287.6	-2.58	-2.59	14.45	3.65575	44.8893	5.7	19.2	2	117.3	10.5	108
2019-12-27_12:00:00	2019-12-27 22:00:03	0	9.93	3.87	0	0	0	286.83	-2.79	-2.95	13.68	4.06037	43.4034	5.9	17.7	2.3	122.1	10	82
2019-12-27_13:00:00	2019-12-27 23:00:03	0	10.61	4.19	0	0	0	286.14	-2.51	-3.06	12.99	3.95774	39.3608	4.7	16.5	2.3	121.5	8.8	120
2019-12-27_14:00:00	2019-12-28 00:00:03	0	9.44	3.86	0	0	0	285.37	-2.33	-3.36	12.22	4.08883	34.7396	5.2	15.4	1.7	122.1	8.9	153
2019-12-27_15:00:00	2019-12-28 01:00:03	0	7.39	3.14	0	0	0	284.34	-2.04	-3.47	11.19	4.02523	30.4512	1.6	14.3	1.1	119	5.3	166
2019-12-27_16:00:00	2019-12-28 02:00:03	0	6.65	2.9	0	0	0	283.54	-1.77	-3.64	10.39	4.04753	25.9321	2	13	0.9	134.1	5.1	244
2019-12-27_17:00:00	2019-12-28 03:00:03	0	5.18	2.35	0	0	0	282.96	-1.51	-3.77	9.81	4.06116	21.8277	3.7	12.2	0.8	113.5	6.1	242
2019-12-27_18:00:00	2019-12-28 04:00:03	0	3.83	1.8	0	0	0	282.89	-1.41	-3.93	9.74	4.17528	19.737	5.6	11.6	0.4	84.8	8	146
2019-12-27_19:00:00	2019-12-28 05:00:03	0	2.87	1.4	0	0	0	282.48	-1.39	-3.56	9.33	3.82174	21.3282	-0.4	10.4	0.8	315.7	3	150
2019-12-27_20:00:00	2019-12-28 06:00:03	0	2.54	1.27	0	0	0	286.27	-0.97	-2.63	13.12	2.80318	20.2451	4.9	10.4	0.6	311.3	7.8	120
2019-12-27_21:00:00	2019-12-28 07:00:03	0	2.48	1.26	0	0	0	290.75	-1.46	-1.63	17.6	2.18826	41.8511	6.1	13.8	0.4	213.5	8.6	91
2019-12-27_22:00:00	2019-12-28 08:00:03	0	1.89	0.96	0	0	0	293.54	-1.65	-0.25	20.39	1.66883	81.3845	2.1	17.1	0.6	108.6	4.8	83
2019-12-27_23:00:00	2019-12-28 09:00:03	0	1.56	0.79	0	0	0	295.39	-1.6	0.73	22.24	1.75866	114.525	1.9	19.1	0.6	58.3	4.9	60
2019-12-28_00:00:00	2019-12-28 10:00:03	0	1.29	0.66	0	0	0	296.95	-1.77	1.45	23.8	2.2881	129.325	4.5	20.7	1.3	134.3	7.6	58
2019-12-28_01:00:00	2019-12-28 11:00:03	0	1.2	0.6	0	0	0	298.12	-2.31	1.86	24.97	2.96575	128.841	2.4	23.2	1.9	153.8	5.9	47
2019-12-28_02:00:00	2019-12-28 12:00:03	0	1.33	0.68	0	0	0	299.06	-2.78	2.2	25.91	3.54519	128.357	0.7	25.6	1.9	127.5	4.4	45
2019-12-28_03:00:00	2019-12-28 13:00:03	0	2.68	1.8	0.07	0	0	299.71	-3.39	2.79	26.56	4.39047	129.455	-0.8	27.4	2.8	139	2.6	57
2019-12-28_04:00:00	2019-12-28 14:00:03	0	5.89	4.45	0.23	0	0	299.94	-3.83	3.08	26.79	4.9148	128.805	3.7	28.4	3.3	142	6.7	358
2019-12-28_05:00:00	2019-12-28 15:00:03	0	7.39	5.41	0.27	0	0	299.85	-4.32	3.1	26.7	5.31718	125.663	9	29.4	3	140.7	12.4	144
2019-12-28_06:00:00	2019-12-28 16:00:03	0	8	5.37	0.23	0	0	299.42	-4.6	2.69	26.27	5.3288	120.318	13.9	29.8	3.5	131.3	17.8	112
2019-12-28_07:00:00	2019-12-28 17:00:03	0	7.87	4.42	0.13	0	0	298.55	-4.61	1.17	25.4	4.75615	104.241	15.1	29.8	3	119.3	19.2	69
2019-12-28_08:00:00	2019-12-28 18:00:03	0	7.01	3.38	0.05	0	0	296.93	-4	-1.84	23.78	4.40291	65.2977	11.6	28.7	3.2	118.5	15.8	79
2019-12-28_09:00:00	2019-12-28 19:00:03	0	6.38	2.69	0	0	0	293.31	-2.54	-2.79	20.16	3.77302	42.3147	8.9	27.1	2.2	118.1	13.8	77
2019-12-28_10:00:00	2019-12-28 20:00:03	0	9.58	3.94	0	0	0	290.68	-2.45	-3.72	17.53	4.45431	33.3691	6.8	24	0.6	101.2	12.3	91
2019-12-28_11:00:00	2019-12-28 21:00:03	0	9.68	4.1	0	0	0	288.84	-2	-4.7	15.69	5.10784	23.0514	5.3	21.5	0.8	121.3	10.9	45
2019-12-28_12:00:00	2019-12-28 22:00:03	0	8.07	3.57	0.01	0	0	287.87	-1.63	-4.83	14.72	5.09763	18.6483	5.8	19.9	1	130.4	10.8	57
2019-12-28_13:00:00	2019-12-28 23:00:03	0	6.72	3.15	0.02	0	0	287.43	-1.41	-4.56	14.28	4.77302	17.1822	3.2	18.9	0.9	115.6	7.4	60
2019-12-28_14:00:00	2019-12-29 00:00:03	0	5.61	2.69	0.01	0	0	286.56	-1.05	-4.23	13.41	4.35837	13.9407	5.8	17	0.4	120.3	10	107
2019-12-28_15:00:00	2019-12-29 01:00:03	0	4.75	2.32	0.01	0	0	285.9	-0.69	-3.49	12.75	3.55756	11.1837	5.6	16.3	0.4	51.3	10.1	234
2019-12-28_16:00:00	2019-12-29 02:00:03	0	3.96	1.97	0.01	0	0	285.57	-0.06	-3.22	12.42	3.22056	1.06758	3.6	14	0.8	327.3	7.6	132
2019-12-28_17:00:00	2019-12-29 03:00:03	0	3.5	1.79	0.01	0	0	286.24	0.67	-2.04	13.09	2.14721	341.818	3.6	12.1	0.7	314.5	7.4	121
2019-12-28_18:00:00	2019-12-29 04:00:03	0	3.48	1.91	0.03	0	0	286.75	0.51	-1.45	13.6	1.53708	340.622	5.4	10.9	0.8	327.4	8.9	158
2019-12-28_19:00:00	2019-12-29 05:00:03	0	3.81	2.21	0.04	0	0	286.71	1.1	-1.29	13.56	1.69532	319.545	2	9.8	1	312.9	5.4	245
2019-12-28_20:00:00	2019-12-29 06:00:03	0	5.14	3.12	0.08	0	0	289.91	1.75	-1.05	16.76	2.04083	300.964	-1.6	10.5	1.3	309.9	1.9	205
2019-12-28_21:00:00	2019-12-29 07:00:03	0	7.8	5.18	0.17	0	0	293.39	2.06	0.16	20.24	2.0662	265.559	-1	14.5	1.3	295.8	2.6	181
2019-12-28_22:00:00	2019-12-29 08:00:03	0	10.07	7.1	0.26	0	0	295.06	1.99	1.88	21.91	2.73761	226.628	2.2	21	1.8	289.7	6.1	145
2019-12-28_23:00:00	2019-12-29 09:00:03	0	9.78	7.01	0.26	0	0	296.85	1.2	2.54	23.7	2.8092	205.288	5.1	24.3	1.3	277.8	11.5	145
2019-12-29_00:00:00	2019-12-29 10:00:03	0	7.94	5.84	0.23	0	0	298.79	-0.2	2.39	25.64	2.39835	175.216	16	26.7	1.1	200.2	23.1	164
2019-12-29_01:00:00	2019-12-29 11:00:03	0	5.73	4.33	0.17	0	0	300.38	-1.62	2.02	27.23	2.58936	141.271	22.2	28	2.3	147.3	28.3	150
2019-12-29_02:00:00	2019-12-29 12:00:03	0	4.73	3.71	0.17	0	0	301.48	-2.7	2.07	28.33	3.40219	127.476	18.3	29.7	1.8	122	23.2	118
2019-12-29_03:00:00	2019-12-29 13:00:03	0	7.66	6.5	0.37	0	0	302.08	-3.32	2.86	28.93	4.38201	130.743	6.8	30.9	2.8	134.4	10.5	114
2019-12-29_04:00:00	2019-12-29 14:00:03	0	14.31	12.58	0.78	0	0	302.28	-4.12	3.2	29.13	5.21674	127.836	39.5	31.7	2.2	132.1	42.5	117
2019-12-29_05:00:00	2019-12-29 15:00:03	0	15.98	14.02	0.88	0	0	302.01	-4.9	3.04	28.86	5.76642	121.816	23.6	32.3	2.6	126.4	25.9	133
2019-12-29_06:00:00	2019-12-29 16:00:03	0	13.84	11.88	0.73	0	0	301.46	-4.94	2.35	28.31	5.47048	115.441	13.9	32.5	2.3	136.4	16.4	74
2019-12-29_07:00:00	2019-12-29 17:00:03	0	10.02	7.98	0.44	0	0	300.46	-4.85	0.54	27.31	4.87997	96.353	14.3	32.2	2.9	115.4	16.7	166
2019-12-29_08:00:00	2019-12-29 18:00:03	0	6.7	4.42	0.17	0	0	298.34	-3.94	-2.24	25.19	4.53224	60.3807	13.1	30.9	2.8	115.9	16.7	343
2019-12-29_09:00:00	2019-12-29 19:00:03	0	5.79	2.71	0.01	0	0	294.11	-2.42	-2.66	20.96	3.59611	42.2952	15.3	28.9	1.8	113.4	20	403
2019-12-29_10:00:00	2019-12-29 20:00:03	0	11	5.17	0.05	0	0	292	-2.28	-4.41	18.85	4.96452	27.3394	17.7	26.2	0.8	104.5	23	329
2019-12-29_11:00:00	2019-12-29 21:00:03	0	11.41	5.55	0.06	0	0	290.46	-2.33	-5.27	17.31	5.7621	23.8515	19.6	24.4	0.6	69.9	24.5	275
2019-12-29_12:00:00	2019-12-29 22:00:03	0	10.14	5.6	0.12	0	0	289.52	-1.99	-4.92	16.37	5.30721	22.022	13.2	21.4	0.3	81.3	17.9	361
2019-12-29_13:00:00	2019-12-29 23:00:03	0	9.4	5.58	0.15	0	0	288.87	-1.76	-4.66	15.72	4.98128	20.6908	6.9	19.3	0.2	341.1	12.6	547
2019-12-29_14:00:00	2019-12-30 00:00:03	0	8.67	5.48	0.17	0	0	288.23	-1.38	-4.52	15.08	4.72597	16.978	6.3	17.5	0.3	333.2	12.1	194
2019-12-29_15:00:00	2019-12-30 01:00:03	0	7.85	5.17	0.17	0	0	287.48	-1.07	-4.45	14.33	4.57683	13.5202	5.8	15.3	0.9	311.1	11.8	123
2019-12-29_16:00:00	2019-12-30 02:00:03	0	6.55	4.32	0.14	0	0	286.95	-0.71	-4.48	13.8	4.53591	9.00554	5.2	14.1	1	318.7	10.7	204
2019-12-29_17:00:00	2019-12-30 03:00:03	0	4.91	3.14	0.09	0	0	286.94	-0.4	-4.62	13.79	4.63728	4.94841	3.3	13.1	0.6	321.6	8.2	351
2019-12-29_18:00:00	2019-12-30 04:00:03	0	3.41	2.08	0.04	0	0	287.03	0.11	-4.56	13.88	4.56133	358.618	3.8	12	0.8	334.8	8	470
2019-12-29_19:00:00	2019-12-30 05:00:03	0	2.45	1.47	0.03	0	0	286.85	0.71	-4.34	13.7	4.39769	350.709	5	10.8	0.9	319.6	8.7	531
2019-12-29_20:00:00	2019-12-30 06:00:03	0	2.15	1.31	0.02	0	0	290.08	0.93	-3.32	16.93	3.4478	344.351	6.2	11.5	0.8	311.3	10.2	432
2019-12-29_21:00:00	2019-12-30 07:00:03	0	2.3	1.43	0.03	0	0	294.47	0.81	-1.6	21.32	1.79335	333.149	7	15.9	0.3	265.3	12	524
2019-12-29_22:00:00	2019-12-30 08:00:03	0	2.43	1.59	0.04	0	0	297.93	0.78	-0.45	24.78	0.9005	299.982	4.6	22.6	0.4	174.2	11.1	375
2019-12-29_23:00:00	2019-12-30 09:00:03	0	2.37	1.66	0.05	0	0	299.26	-0.22	0.36	26.11	0.4219	148.57	2.2	26.8	0.6	141.4	7.5	434
2019-12-30_00:00:00	2019-12-30 10:00:03	0	1.53	1.06	0.03	0	0	300.47	-1.06	0.03	27.32	1.06042	91.621	5.8	29.1	1.3	120.4	10	347
2019-12-30_01:00:00	2019-12-30 11:00:03	0	0.88	0.6	0.02	0	0	301.46	-1.66	-0.4	28.31	1.70751	76.4522	2.3	30.3	0.9	60.1	9.4	139
2019-12-30_02:00:00	2019-12-30 12:00:03	0	0.7	0.5	0.02	0	0	302.24	-2.56	-1.01	29.09	2.75204	68.4694	4.1	31.4	1.4	116.2	10.3	149
2019-12-30_03:00:00	2019-12-30 13:00:03	0	0.95	0.73	0.03	0	0	302.67	-3.22	-1.86	29.52	3.7186	59.9877	6	31.7	2.1	139.5	11.2	153
2019-12-30_04:00:00	2019-12-30 14:00:03	0	1.46	1.14	0.05	0	0	302.79	-3.34	-2.75	29.64	4.32644	50.5337	7.4	32.7	1.9	121.7	10.5	211
2019-12-30_05:00:00	2019-12-30 15:00:03	0	2.05	1.56	0.07	0	0	302.59	-3.16	-3.83	29.44	4.96533	39.525	5.2	33.2	0.6	117.9	7.1	218
2019-12-30_06:00:00	2019-12-30 16:00:03	0	3.41	2.32	0.1	0	0	301.52	-3.03	-5.45	28.37	6.23566	29.0726	6.8	33.6	1	81.3	8.7	262
2019-12-30_07:00:00	2019-12-30 17:00:03	0	4.72	3.15	0.13	0	0	299.92	-3.27	-6.13	26.77	6.94765	28.0774	11.6	32.7	2.3	120.8	13.8	535
2019-12-30_08:00:00	2019-12-30 18:00:03	0	7.4	5.19	0.23	0	0	297.69	-2.91	-6.4	24.54	7.03051	24.4508	14.7	32	2.1	66	17.2	355
2019-12-30_09:00:00	2019-12-30 19:00:03	0	13.46	9.97	0.5	0	0	294.47	-2.07	-5.74	21.32	6.10184	19.8308	9.4	29.3	1.9	39.5	13	199
2019-12-30_10:00:00	2019-12-30 20:00:03	0	16	10.62	0.46	0	0	292.58	-2.2	-6.3	19.43	6.67308	19.2496	5.4	26.4	1.5	33.4	9.9	109
2019-12-30_11:00:00	2019-12-30 21:00:03	0	16.33	10.41	0.41	0	0	291.17	-1.47	-5.91	18.02	6.09007	13.9679	5	24.4	0.8	56.2	9.7	114
2019-12-30_12:00:00	2019-12-30 22:00:03	0	18.31	12.88	0.58	0	0	290.62	-0.9	-5.25	17.47	5.32658	9.72766	3.3	22.7	0.4	78.4	9
2019-12-30_13:00:00	2019-12-30 23:00:03	0	19.4	14.98	0.74	0	0	290.49	-0.22	-5.02	17.34	5.02482	2.50944	6.8	21.4	0.6	136.7	14.3	63
2019-12-30_14:00:00	2019-12-31 00:00:03	0	19.45	15.85	0.83	0	0	290.77	0.49	-4.59	17.62	4.61608	353.907	10.7	20.2	0.6	124.8	19	60
2019-12-30_15:00:00	2019-12-31 01:00:03	0	16.82	13.73	0.71	0	0	290.15	0.73	-4.07	17	4.13495	349.832	16.3	19	0.1	26.3	24.4	102
2019-12-30_16:00:00	2019-12-31 02:00:03	0	12.22	9.82	0.49	0	0	289.66	0.95	-3.91	16.51	4.02375	346.344	19.3	18.1	0.2	79.9	26.4	147
2019-12-30_17:00:00	2019-12-31 03:00:03	0	8.11	6.28	0.29	0	0	289.66	0.92	-4.29	16.51	4.38754	347.896	21.9	17	0.2	79.3	28.3	124
2019-12-30_18:00:00	2019-12-31 04:00:03	0	4.63	3.12	0.11	0	0	289.47	0.68	-4.67	16.32	4.71925	351.715	17.4	15.2	0.5	330.4	23.7	91
2019-12-30_19:00:00	2019-12-31 05:00:03	0	3.65	2.19	0.05	0	0	289.05	0.23	-4.94	15.9	4.94535	357.334	18	13.7	1	328	23.7	107
2019-12-30_20:00:00	2019-12-31 06:00:03	0	3.58	2.15	0.05	0	0	291.51	0.12	-4.51	18.36	4.5116	358.476	12.7	13.4	0.9	306.3	18.9	116
2019-12-30_21:00:00	2019-12-31 07:00:03	0	3.4	2.07	0.05	0	0	294.83	0.39	-3.99	21.68	4.00901	354.417	13.8	16.3	0.9	301	24.7	203
2019-12-30_22:00:00	2019-12-31 08:00:03	0	2.12	1.36	0.04	0	0	297.71	0.88	-2.86	24.56	2.99232	342.897	12.1	22.2	0.6	306.7	19.6	313
2019-12-30_23:00:00	2019-12-31 09:00:03	0	1.55	1.07	0.04	0	0	299.24	0.85	-1.77	26.09	1.96352	334.349	7.9	26.6	0.5	235.3	11.9	613
2019-12-31_00:00:00	2019-12-31 10:00:03	0	1.31	0.96	0.04	0	0	300.21	0.4	-1.61	27.06	1.65895	346.048	6.3	28.7	1	206.1	10.5	831
2019-12-31_01:00:00	2019-12-31 11:00:03	0	1.09	0.81	0.03	0	0	301.01	0.21	-1.78	27.86	1.79234	353.272	4	30.1	0.8	263.6	8.9	950
2019-12-31_02:00:00	2019-12-31 12:00:03	0	1.05	0.77	0.03	0	0	301.7	0.32	-2.09	28.55	2.11436	351.295	6.2	30.6	1.3	217.2	12.7	795
2019-12-31_03:00:00	2019-12-31 13:00:03	0	1.19	0.82	0.03	0	0	302.22	0.41	-2.42	29.07	2.45449	350.384	9.1	31.3	0.7	243.5	15.7	683
2019-12-31_04:00:00	2019-12-31 14:00:03	0	1.44	0.93	0.02	0	0	302.57	0.73	-2.68	29.42	2.77764	344.763	12.4	32.1	1.6	152.6	18.1	668
2019-12-31_05:00:00	2019-12-31 15:00:03	0	1.72	1.03	0.02	0	0	302.67	1.25	-2.55	29.52	2.83989	333.886	14	33	1	299.6	19.3	721
2019-12-31_06:00:00	2019-12-31 16:00:03	0	2.23	1.24	0.02	0	0	302.49	2.15	-2.08	29.34	2.99147	314.052	13.4	33	1.3	237.7	19.1	710
2019-12-31_07:00:00	2019-12-31 17:00:03	0	2.99	1.62	0.02	0	0	301.89	2.88	-1.38	28.74	3.19356	295.602	13.2	33.1	1.8	234.4	20.1	342
2019-12-31_08:00:00	2019-12-31 18:00:03	0	5.43	3.48	0.11	0	0	300.64	2.48	-1.6	27.49	2.95134	302.829	14.3	32.1	1	231	21.5	187
2019-12-31_09:00:00	2019-12-31 19:00:03	0	16.2	12.58	0.64	0	0	296.4	0.42	-3.07	23.25	3.0986	352.21	18.3	30.6	1.4	265.1	25.9	144
2019-12-31_10:00:00	2019-12-31 20:00:03	0	29.66	23.78	1.29	0	0	295.02	-0.53	-4.84	21.87	4.86893	6.24931	25.5	28.1	1.9	41.4	36	117
2019-12-31_11:00:00	2019-12-31 21:00:03	0	31.49	24.4	1.28	0	0	293.58	-0.68	-5.62	20.43	5.66099	6.89913	18.1	26	0.6	19.1	24.1	162
2019-12-31_12:00:00	2019-12-31 22:00:03	0	33.94	25.99	1.34	0	0	292.23	-0.51	-5.2	19.08	5.22495	5.60156	25.3	24.5	0.3	303	29.7	236
2019-12-31_13:00:00	2019-12-31 23:00:03	0	33.64	26.53	1.4	0	0	291.63	0.4	-4.52	18.48	4.53766	354.943	32.6	23.1	0.5	289.5	37.5	267
2019-12-31_14:00:00	2020-01-01 00:00:03	0	22.45	17.18	0.86	0	0	291.63	1.65	-4.02	18.48	4.34545	337.684	35.6	21.6	0.2	284.1	40.6	233
2019-12-31_15:00:00	2020-01-01 01:00:03	0	15.32	10.3	0.41	0	0	291.69	2.38	-4.01	18.54	4.6631	329.31	35.3	19.9	0.3	325.2	40.4	266
2019-12-31_16:00:00	2020-01-01 02:00:03	0	10.69	5.64	0.11	0	0	291.23	2.63	-3.9	18.08	4.70392	326.006	31.3	18.8	0.3	98.2	37.1	279
2019-12-31_17:00:00	2020-01-01 03:00:03	0	9.35	4.48	0.04	0	0	290.93	2.71	-3.76	17.78	4.63484	324.218	30.5	17.8	0.5	100.8	35.9	367
2019-12-31_18:00:00	2020-01-01 04:00:03	0	9.12	4.29	0.02	0	0	290.48	2.64	-3.75	17.33	4.58608	324.855	23.2	18.5	0.6	89.3	28.6	616
2019-12-31_19:00:00	2020-01-01 05:00:03	0	8.99	4.23	0.01	0	0	290	2.61	-3.67	16.85	4.50344	324.581	23.1	16.9	0.7	316.5	27.6	599
2019-12-31_20:00:00	2020-01-01 06:00:03	0	9.19	4.34	0.01	0	0	292.07	2.7	-3.13	18.92	4.13363	319.218	20.6	16.2	0.7	323.7	26.7	667
2019-12-31_21:00:00	2020-01-01 07:00:03	0	9.37	4.44	0.01	0	0	294.94	3.54	-2.28	21.79	4.2107	302.784	17.4	19	0.2	97.4	27.2	1168
2019-12-31_22:00:00	2020-01-01 08:00:03	0	9.47	4.54	0.01	0	0	297.02	3.87	-1.52	23.87	4.1578	291.443	14.8	23.9	2.9	292.9	23.9	1624
2019-12-31_23:00:00	2020-01-01 09:00:03	0	9.53	4.82	0.04	0	0	298.49	3.42	-0.8	25.34	3.51232	283.166	4.4	26.3	3.6	284.1	12.8	1613
2020-01-01_00:00:00	2020-01-01 10:00:03	0	10.4	5.89	0.11	0	0	299.67	2.97	-0.12	26.52	2.97242	272.314	6.3	27.9	3.5	275.5	15.3	1603
														6.2	29.7	2.5	286.3	13.9	1640
														10.5	31.1	2.1	236	19	1344
														21.5	32.3	1.4	257.3	31	1005
														28.5	33	1.9	199.2	39.4	1075
														28.7	33.3	1.3	181.5	41.3	968
															30.3	2.3	214.8		960
															26.3	0.8	8.8		329
															26	1.8	46.9		205
														20.2	25.1	1.8	26.2	25.3	227
														19.2	23.6	0.5	270.4	24.2	216
														17.6	23.2	1.5	122.8	22.5	389
														19.6	23.6	2.9	183.2	24.8	654
														17.6	20.2	2	169.2	26.9	720
														5.2	18.9	2.2	317.7	8.4	1113
														4.2	19.7	0.2	254.1	6.3	966
														6.9	19.4	1	129.6	8.4	993
														7	18.9	0.4	98.3	8.8	850
														5.9	17.4	0.6	323.7	7.5	648
														3.9	16.6	0.2	341.4	5.6	801
														6	17	0.4	117.9	8.6	812
														6	19.5	1.7	123.6	9.1	765
														12.5	22.9	2.2	131.7	15.6	548
														34.5	25.1	2	129.8	39.1	430
														40.8	27.7	1	142	45.6
														27.1	30.2	0.6	165.8	31.5
														19.5	31.5	1.3	133.4	25.8
														19	32.7	1.4	130.7	26.7
														17.7	34	1.5	246.6	27.5
														18.6	32.2	4	143.5	32.5
														85.4	28	3.6	118.3	103
														74.2	23.3	2.3	25.7	86.6
														15	24.6	1.3	48.1	20.2
														13.2	23.7	3.1	143.2	17.4
														10.6	21.8	1.4	67	15.9
														14.1	21.2	1.3	308	19.8
														18.9	21.1	1	307.4	23
														12.8	20.4	0.4	96.8	15.6
														13.6	20.1	1.1	120.7	16.5
														17.9	20.1	0.9	126	21.3
														28.3	20	1	113.9	31.5
														29.2	19.3	1.3	116.1	33.6
														29.9	18.7	1.1	111.8	36.2
														43	18	1.2	116.6	51.2
														48.2	17.9	0.3	293.8	57.4
														36.6	20	1.9	121.5	45
														20.3	21.8	2.1	129.6	28.5
														22.1	24	1.6	127.3	30
														23.2	26.6	0.8	134.9	30.7
														25.8	28.6	0.7	167	33.1
														24.1	30.3	0.6	50.9	31.2
														25.6	31.6	0.8	227	33.1
														24.4	32.6	1	321.8	33
														23.1	33.1	2	157	31.8
														19.8	34	2.4	207.7	30
														16.4	32.9	0.9	245.8	26.8
														17.3	31.5	2.5	180.5	28
														46.6	29.6	2.2	122.9	61.4
														57.6	27.5	1.2	108	69.4
														56.1	25.5	0.8	96.6	66.5
														49.8	24.6	1.7	123.9	60.7
														39.6	23.9	1.4	116.3	49
														33.3	22.7	0.7	98	41.5
														33.7	21.5	0.4	31.4	41.7
														31.8	20.3	0.1	90.6	39.1
														31.6	19.4	0.6	330.8	38.7
														30.3	18.6	0.9	329.9	37.1
														29.5	17.6	0.8	327.7	35.9
														32	17.4	1.2	314.5	38.2
														40.1	20.7	1.6	303.5	47.7
														53.3	25	3.3	302.8	63.1
														41.4	28	3.5	297.2	51.7
														25	29.8	3.7	280.7	36.1
														18.9	31.1	3.4	274.9	30.2
														16.8	32	2.4	271.9	28.6
														25.3	32.9	1.7	208.4	36.8
														26.1	33.9	0.7	156.6	38.6
														22	34.4	2.2	166.1	36.1
														16.5	34.7	2.5	179.8	30.1
														18.8	35.2	0.4	221.4	31.4
														19.1	34.8	0.8	162.4	31.2
														25.1	33.4	1.5	67.4	37.1
														41.6	30.8	1.1	57.1	54.2
														35.7	28.9	0.7	34.8	47.3
														28.3	27.2	0.5	97.8	39.2
														29.3	25.4	0.2	83.7	39.8
														26.5	23.5	0.1	78.1	37.2
														23.2	21.6	0.7	325.8	34.8
														23.6	20.1	1.5	309.5	36.7
														23.7	19.7	1	317.8	37.6
														24.2	18.9	1.2	321.3	37.3
														25	18.7	1.8	310.6	37.1
														31.1	22.4	2.8	293.5	42.6
														25.9	23.9	2.9	286.2	36.8
														13.2	25.7	3.3	297.7	23.9
														12.2	28	3.1	292.7	23.5
														25.6	30.1	2.6	270.4	36.9
														87.9	31	2.2	235.2	100.4
														56.9	32.7	1.6	199.9	69.4
														39.7	34.1	1.3	155.6	53.3
														37	35.1	1.4	129	51.6
														43.3	35.5	1.8	93.7	59.1
														59.1	34.6	3.8	115.1	78.2
														84.3	33	3.4	111.2	105.4
														99.9	29.6	5.2	127	122.4
														115.4	27.3	2.8	119.8	139.1
														107.5	24.7	3	119.3	128.3
														92.8	22	3.1	117.4	109.9
														95.5	20.3	4.1	119.5	111
														91.3	19.3	4.2	120.3	106.1
														51.4	18.6	4.7	120.5	59.5
														30	18.3	4	119	33.6
														17.6	18.2	3.5	117.4	19.5
														13.3	18.2	2.8	114.4	14.9
														13.4	17.9	3.2	118.4	15.3
														18.2	17.5	1.7	113.7	20.8
														20.2	17.2	1.2	95.3	23.5
														22.1	17.9	2.2	118.6	25.3
														26.1	19.5	2.9	119.4	29
														27.1	21.6	2.4	108.7	30.2
														31.3	23.9	2.1	110.1	35.6
														30.3	25.5	3.2	134.6	36.1
														30.5	27.7	1.5	162.2	37.6
														32.8	29.1	2.1	132.6	40.9
														34.2	30.6	1.7	146	44.4
														34.5	31.2	2.3	123.1	46.1
														31.6	31.3	2.3	118.4	44.4
														30	30.9	3	125.8	41.8
														42.7	30.1	2.4	111	54.9
														46.9	27.7	2.8	116.3	58.1
														43.3	24.8	2.2	111.6	57.8
														40.4	22.3	3.1	116.9	57.4
														36.9	20.8	2.3	114	51.2
														36.6	20.2	2.2	116.3	50.3
														35.6	20	2.7	118.2	49.5
														34.1	19.5	2.6	117.3	44.4
														20.7	19.1	2.6	120.2	24.1
														19	19	2.7	120.1	20.1
														18.5	19	2.4	120.8	19.8
														16.3	18.8	1.7	118.1	17.4
														14.1	18.4	1.4	120.4	8.6
														15.7	19.6	1.7	119	11
														15	22	1.5	71	18.3
														13.5	24.1	0.8	43.2	18.5
														18.9	26	0.5	187.1	25.9
														22.5	28.1	1.3	205.1	32.2
														23.1	29	2	152.5	32.9
														22.6	30.3	1.9	117.3	32.7
														24.6	30.5	4	131.7	34.6
														31.5	29.1	6.3	136.7	52.3
														22.3	25.6	3.3	153.1	91.4
														14.8	22	2.8	317.4	24.5
														23.9	22.4	1.4	350.1	30.3
														18.6	22.3	1.8	355.3	22.1
														13.9	21.8	0.5	313.4	15.9
														9.7	20.9	0.3	28.8	12.4
														10.3	19.9	0.3	293.7	13.7
														11.7	19.3	0.6	323.5	15.5
														14.3	18.8	0.9	333.9	17.8
														13.1	18.3	0.4	309.3	16
														12.3	17.4	0.5	318.7	15.1
														13.4	16.4	0.6	323.6	16
														12.9	15.4	0.7	317	15.3
														14.8	14.6	1	308.3	17.6
														13.1	15.2	0.7	286.3	16.3
														14.3	17.8	0.8	311.9	18.9
														13.7	22.5	1.2	297.8	18.7
														14.5	26	2.2	260.5	19.3
														10.9	26.9	2.6	271.8	14.5
														12.9	27.4	1.6	283	16.3
														15.7	28.7	1.2	231.2	20.1
														16.7	30.2	1.7	179.2	22.9
														20.3	30.7	1.1	177.4	28.3
														19.4	31.1	0.1	347.6	29.2
														17.8	23.4	5	175.1	28.8
														21	20.5	0.5	328.2	29.1
														20.3	21.9	0.2	30.5	25.6
														15.1	23	0.9	105.5	19.3
														17.9	22.8	0.5	121.2	22.5
														22.3	21.8	0.9	127.3	26.4
														29.1	21.3	0.9	108.8	32.5
														25.8	21.6	1.8	136.7	29
														23.2	19.8	0.7	337.5	29
														27.4	19.8	0.2	62.6	33.5
														29.1	19.6	0.4	119.8	34.3
														25.6	19.3	0.4	83.5	29.6
														25.9	18.7	0.6	102.5	30.3
														23.5	18	1	120.9	28.6
														22	18	0.9	111.2	28.8
														27.4	18.5	0.9	130.3	35.1
															18.7	0.3	153.1
															21.1	1.3	129.5
															24.3	0.4	310.4
															31.2	2.2	259.1
														22.1	31.1	1.7	275.4	33.1
														22.6	22.1	4.7	145.7	34.2
														18.3	19.4	2.2	103.2	27.4
														15.2	19.1	1.8	103.4	20.3
														10.4	17.7	2.4	341	14.3
														4.7	17.2	2.1	37.4	7.4
														7.1	18.2	0.8	94	9.3
														9.4	17.4	0.6	97.6	10.9
														10	17.2	0.4	280	12.6
														6.3	17.5	0.5	51.8	12.2
														12	17.7	0.2	23.4	14.8
														16.3	17	0.3	337.7	19.3
														14.3	16.4	0.1	32.3	17.4
														12.8	16.2	0.3	38.7	15.7
														9.8	16.1	0.5	105.1	12.7
														7.4	15.7	0.4	334.2	11.2
														10.6	15.7	0.1	333	14.5
														17	17.6	0.5	149.1	20.5
														14	21.5	0.3	151.4	16.7
														10	25.1	0.8	265.5	14.4
														11.6	26.3	2.6	281.7	16
														9.2	27.5	3.2	290	13
														13.3	28.7	2.9	298.7	17.3
														14.7	29.7	3.9	291.7	18.5
														10.6	30.2	4.3	299	15.6
														10.9	30.7	4.3	299.2	17.3
														12	30.8	3.9	287.6	20.8
														20.4	31.1	3.8	298.4	32.1
														31.5	30.6	3.3	300.7	46.1
														20.8	29.4	2.6	303.7	36.6
														21.4	27.4	1.5	312.6	35
														18.3	25.1	0.9	296	30.6
														16.4	23.7	0.4	315.2	28.8
														16.1	22.9	0.2	135.7	26.3
														16.4	24	0.6	293.5	24.6
														14.7	25.1	0.9	300.5	23.3
														19.8	24	0.5	303	28.3
														18.4	24.1	1.4	289.1	28.3
														15.4	23.5	2.7	295.9	27
														14.9	22.8	2.5	299.4	26.5
														15.2	22.7	3.6	293.6	26.2
														16.9	23.1	3.8	293.9	28.1
														17.2	24.5	5.7	293	28.9
														15.8	25.2	4.6	277.6	28.9
														15.7	25.6	4.8	289.4	28.7
														18.2	25.6	3.6	279.6	34
														20.1	27.3	3.4	260	59.8
														24.7	27.2	2.4	275.2	116.7
														27.9	24.9	1.4	292.9	146.5
														20.5	24.5	1.1	22.8	85.2
														17.6	26.4	0.6	24.9	67.5
														19.4	27	0.5	250	63.8
														20.2	26.2	0.2	183.5	62.3
														13.5	23.3	4.4	125.3	43.9
														31.4	20.1	3.4	118.3	55.7
														30.8	18.5	2.7	115.8	44.9
														14.3	17.7	3.3	120	20.1
														8.9	16.7	3.6	121	12.8
														4.8	16.2	4.2	121.7	7.2
														1.2	16.2	3.2	118.6	2.9
														1.7	16.3	2.8	115.7	2.6
														1.2	16.1	3.3	118.9	1.7
														2.1	16	2.9	116.7	2.3
														1.7	16.1	2.4	114.4	2
														1	16	1.7	106.1	1
														3.4	15.4	1.9	109.1	3.7
														7.1	15.6	2.2	113.8	8.9
														10.9	15.8	3.1	117.6	15.6
														6.7	15.6	2.4	111.6	8.6
														9.9	15.7	2.3	104.9	11.1
														17.8	16.1	2.9	112	21.2
														35.2	15.9	5.4	125.9	42.1
														51.9	16.2	4.1	119.9	59.6
														63.3	17.1	4.5	121	73.6
														60.8	16	4	116.6	71.3
														61.6	16	3.8	118.1	74.9
														40.5	15.7	3.8	118.1	55.2
														27.8	15.6	3.1	114.2	44
														15.7	15.4	3	114.5	31.1
														10.4	15.3	3.3	115.9	22
														6.7	14.6	3.7	117	13.1
														4	13.7	3	115.6	7.3
														6.5	13.6	2.9	114.7	12.1
														9.8	13.7	2.6	115	18.4
														11	13.5	2.4	114.8	20.2
														7.9	12.8	1.8	111.5	16.3
														5.5	12.9	1.9	112.2	13.6
														6.2	13.2	1.7	111.8	13.9
														5.9	13.4	2.8	117.5	13.7
														5.2	13.7	2.4	115.8	11.5
														9.4	14.7	2.8	118.7	14.4
														11.8	16.3	2.6	113.6	17.9
														14.8	17.9	3.2	117.2	21.1
														16	19.1	4.1	124.4	23.2
														16.3	20.4	3.8	123.7	24.5
														15.6	21.5	3.9	128.9	24.7
														17	22.7	3.5	136.8	27
														16.5	23.4	4	130.4	27.4
														18.4	23.5	4	139	29.5
														14.7	23.5	3.9	131.4	25.4
														17	23.1	3.3	121.6	26.2
														13	21.4	3.6	121.7	21.3
														13.1	19.6	1.9	115.7	21.4
														11.1	18.1	2.1	113.9	18.7
														10.5	16.7	2.2	111.5	17.3
														10.3	15.8	2.1	117.3	16.3
														6	14.9	1.6	121.3	12.5
														8.3	14.1	1.7	122.4	14.4
														5.6	13.2	1.4	121.6	11.6
														4.7	12.8	1.4	120.8	10.7
														6.3	12.2	0.8	115.4	12.4
														2.2	11.3	0.9	120.9	7.4
														2.5	11.3	1.2	122	7.6
														3	13.4	2.2	120.4	9.4
														5.8	15.6	3.5	120.7	12.7
														9.5	17.9	3.4	118.5	15.2
														5.6	20.2	3.9	121.6	10.2
														4.9	21.4	3.8	127.9	16.2
														8.8	22.6	3.1	136.5	14.7
														8.8	23.7	3.9	136.7	12.4
														8.1	24.2	5	139.5	11.5
														9.2	24.3	4.6	125.7	12.6
														9.9	24.6	3.5	120.2	13.8
														4.1	24.6	3.3	121.2	8.3
														4.4	24.7	2.7	110	8.8
														9.2	22.5	2.5	109.7	14.7
														8.5	20.8	1.7	107.1	14.2
														8.7	19.3	2	114.4	14.1
														9.6	18.3	2.3	120.2	14.7
														5.1	17.9	2.3	119.6	9.8
														6.8	17.7	1.9	119.6	11.2
														4.5	17.6	2.4	117.4	9
														5.2	17.4	2	119.7	10
														3.5	17.2	2	119.9	7.9
														7.1	16.6	1.9	122.7	10.9
														3.4	16.5	2	122.3	6.2
														6.1	16.4	1.9	120.9	9.2
														5.9	17.6	2.6	124.8	9.9
														3.8	20	1.1	76.3	7.1
														1.8	21.6	1.3	44.1	3.5
														1.5	23.4	1.6	54.9	2.8
														3.9	24.3	1.9	69.6	5.7
														4	25.6	1.7	58	5.2
														4.2	19.9	2.4	295.2	6.6
														4	18.9	0.9	135.7	6.7
														5.9	19.9	1.9	122.7	7.4
														4.5	20.3	1.4	146.7	6.4
														3.6	19.8	2.3	143.1	5.2
														3.7	19.3	1.9	118.4	5.2
														4	18.9	1.9	118.8	5
														3.1	18.4	0.4	86.8	3.7
														0.3	18.1	0.6	134.2	1.6
														2.4	18.2	1	48.5	3.6
														1.4	18.6	1.6	33.1	2.3
														0.5	18.4	0.3	8.4	1.1
														1.5	18	0.3	117.8	2
														1.9	17.6	0.4	134	3
														0.5	17.7	0.5	65.7	2.2
														3.8	17.9	0.3	48.2	5.8
														3.1	17.5	0.6	88.3	5
														4.1	17.3	0.1	71.2	6.4
														5	16.9	0.2	265.3	7.7
														5.6	17.7	0.5	267.4	7.9
														6.6	20	0.4	196.2	9.1
														9.3	21.6	2.1	310.6	11.6
														5.9	22.7	3	304.5	9
														7.5	23.7	2.3	290.8	10.5
														7.6	23.6	0.5	155	10.2
														13.3	20.3	1	57.8	15.9
														12.3	18.6	1.8	176.7	15.2
														5.7	16.7	3.7	187.5	7
														4.8	16.4	2	231	5.6
														4.4	16.1	1.9	306.3	5.3
														2.5	15.8	0.4	36.4	3.6
														1.5	15.7	1	91.6	2.3
														3	15.8	1	110.1	3.7
														3.9	15.6	0.4	90.7	4.9
														5.2	15.5	0.3	108.5	6.5
														1.7	15.7	0.2	69.3	3.5
														5.1	15.7	0.5	90.3	7
														6.4	15.8	0.4	86.7	7.9
														9.3	15.7	0.3	51.5	10.9
														8.2	15.3	0.4	85.3	10
														4.1	14.7	0.4	345	6.6
														9.5	14.4	0.6	337.7	12.1
														6.5	15.3	0.1	153	8.8
														5.9	17.1	0.4	113.1	8.8
														3.8	19.5	0.6	160.8	6.1
														4.4	21	1.3	253.7	6.1
														3.7	21.3	1.7	243.3	5.4
														4.4	18.8	1	297.3	6.4
														8.9	18.8	0.4	355.4	10.4
														3	19	0.9	58.2	4.4
														1	17.1	1.1	263.2	3
														3.5	16.7	0.9	132.3	4.6
														0.5	17.2	1.1	121.1	1.3
														2.5	17.3	0.7	95.5	3.5
														3.6	17.1	0.9	116	4.7
														2.7	16.6	1.4	118.9	3.4
														2.8	16.5	2.2	124.2	3.4
														-0.5	16.5	1.9	122.4	0.5
														-0.2	16.6	2.7	126	0.5
														0.2	16.3	2.2	125.3	0.4
														-1.6	16.1	2	128.8	-1.3
														0.3	16.1	0.9	112	0.8
														-0.2	16.2	1.2	118	0.4
														1	16.3	1.6	122.7	1.9
														-0.1	16.3	2.3	122.7	1.5
														2.8	16.1	2.7	123.4	4.2
														0.9	15.5	1.8	120.1	2
														4.4	15.7	1.7	118.8	6
														3.7	16.4	3.2	122.3	5.4
														1.5	16.7	4	123.9	2.1
														2.8	17	4	122.7	3.6
														1.8	16.7	3.8	122.5	2.7
														1.4	16.7	2.8	118.6	2.6
														2.5	16.9	3.5	121.7	3.3
														4	17.1	2.9	120.1	4.8
														0.3	18.5	4	122.4	1.3
														1	18.6	3.7	124.6	2.4
														1.7	17.8	3.2	122.4	2.8
														3.8	17.6	2.8	121	4.8
														2.1	17	2.3	119.4	3
														0.3	16.8	2.8	120	1.2
														3.9	16.6	2.5	120	5.3
														1.4	16.5	2	119.1	3.3
														3.7	16.4	1.3	110.1	6.3
														0.4	16.2	1.5	124	2.9
														1.1	16.3	1.4	120.2	2.4
														1.8	16.3	2.5	123.8	2.6
														0.4	16.1	2.7	120.6	1
														1.2	16	2	120.8	1.8
														-0.4	16.1	1.7	118.4	0.1
														-1.4	16.4	1.6	122.2	-0.9
														1	17.4	1.4	118.3	1
														0.9	18.6	1.3	101.9	1.3
														4.8	20.6	1	134.4	4.9
														2	21.8	0.5	197.3	2.5
														3.5	20.8	0.7	304	4.6
														1.6	21.6	1.3	108	3.8
														1.8	23.7	2.2	270.6	3.7
														1.1	25.4	2.6	268.9	2.8
														3.5	23.9	1.2	141.3	4.8
														4.6	22.7	2.1	111.1	5.5
														3.2	21.4	0.8	119.6	4.2
														1	21.5	0.9	111.2	2.8
														2.6	20.2	1.3	120.4	4
														1.5	18.8	0.7	103.5	3.2
														1.6	18.6	0.9	120.7	3.4
														3.4	18.2	0.3	112.9	5.4
														1.4	17.8	0.4	122	3.8
														2.7	17.5	0.6	123.9	4.7
														-0.3	16.9	0.3	127.8	2.4
														-0.2	16.7	0.1	283.6	2.7
														2.6	16.9	0	334.8	5.9
														4.1	17.1	0.2	39.9	7.4
														8.5	17.4	0.4	114.8	12.5
														10.1	17.9	0.3	335.2	15.1
														10.8	20.7	1.2	322.5	17.3
														7.7	24	3.4	318	12.1
														5.4	26	2.8	330.1	10.7
														9	27.2	4.2	317.1	15.8
														8.8	28.2	4.3	321.6	16.1
														10.6	27.7	4	322.2	19.1
														9.3	28.6	3.8	325.1	17.8
														9.1	28.6	3.8	326.8	17.8
														10.5	27.7	4	313.6	19.6
														8.4	27	3.1	322.2	16.3
														7.1	27.6	1.9	350	14.1
														5.4	24	1.9	343.7	13.7
														3.8	22.9	0.6	276.6	13.6
														7.7	24	2.2	311.3	35.8
														11.3	22.6	0.6	294.5	55.6
														10.7	21.7	0.8	282	49.9
														11.8	20.5	0.5	291.7	52.9
														8.3	19.3	0.5	325.2	47
														9.8	17.7	0.5	318.3	38.7
														10.1	16.6	0.6	324.5	39.3
														12.8	15.9	0.6	337.9	49.4
														15.4	15.2	0.6	327.2	67.4
														13.1	14.7	0.4	330.4	77.6
														15.7	17	0.8	309.7	79.2
														18.8	21.5	2.9	307.2	80
														12.5	23.5	3.9	305.3	69
														14.2	24.9	5.1	301.2	75.8
														8.1	26	5.9	304.2	62.6
														7.8	26.8	5.4	307.1	53.9
														12.6	27.8	5.8	304.7	53.8
														11.4	28.2	6.5	306.7	43.4
														10.4	28.7	5.5	307.2	34.4
														6	29	5	311.1	29
														1.1	28.8	4	308.9	22.4
														6.1	28.2	3.3	308.8	27.2
														5	26.3	1.9	302.4	23.1
														2.6	22.1	0.7	324.8	18.8
														7.2	19.2	1	327.1	22.8
														8.4	16.9	0.9	317.5	23.4
														6.3	15.5	0.8	331.8	21.8
														7	14.2	0.8	326.3	21
														3.9	12.8	0.9	322.5	15
														1.6	12.2	1	328.4	10.5
														4.1	11.4	0.9	330.7	12.1
														5	10.6	0.7	328.7	12.3
														4.2	10.4	0.9	337.5	11.2
														5.4	10.4	0.9	321.6	13.2
														7	13.4	0.9	318.4	17.1
														7.1	19	0.3	259.8	18.4
														9.6	24.4	1	295.4	23.4
														6.7	26.3	2.4	292.1	23.7
														6.7	27.7	2.1	281	23.4
														4.4	29.2	3.3	295.7	22.8
														9.4	29.8	5.6	290.7	32.5
														9.4	30.7	5	286.2	33.6
														8.5	31.2	4.6	290.1	32.3
														11.2	31.3	4.6	296.6	36.7
														10.9	31.4	3.9	292.4	36.2
														9.2	31.1	3	300.5	34.2
														8.5	29.8	1.4	304	31.3
														10.8	27	0.5	323.9	33.6
														12	24.4	0.3	350.4	31.4
														11.7	25.3	1.1	20.6	30.8
														10.6	24.6	1.7	4.7	26.5
														11.5	23.3	1.3	346.1	20.9
														9.7	23.1	0.6	283.2	18.7
														8.9	22.7	1.4	283.6	16.2
														8.3	22	1.5	305.6	13.8
														4.5	23	2.8	310.9	9.5
														3.9	22.6	4	307.1	8.3
														5	22.4	4.1	304.6	9.3
														5.8	23	4.7	307.8	10.8
														5	24.3	4.4	316.8	11
														7.7	25.9	4.3	313.1	19.9
														9.4	27.4	4.5	311	16.9
														8.7	28.6	4.6	314.4	16.4
														9.8	29.1	5	311.4	19.1
														12.7	29.8	4.2	315.5	22.7
															29.8	4.3	312.6
															27.3	3.4	309.8
															24.3	1.6	306.3
														-2.6	23.9	1.1	311.4	0.7
														8.3	19.1	3.2	295.4	14
														3.6	19.2	0.1	213.4	7.6
														4.2	19.6	0.2	320.2	7.5
														6.1	20.2	0.2	145.6	10
														4.5	21.3	0.3	246.2	9.7
														1.8	21.1	0.2	347.5	7.1
														4.9	22.8	1.3	281.6	9.9
														5.5	22.7	1.7	322.2	9.8
														8.7	23	3.2	313.4	12.7
														5.5	23	1.7	325.5	10.8
														5.6	22.5	2.6	296.8	10.5
														7.6	22.2	1.8	301.4	12.9
														7.1	22	2.5	290.5	11.9
														5.8	21.9	3.3	302.9	9.6
														4.8	22.5	3.7	297.6	7.8
														2.7	23.3	4.5	304.2	5.4
														4	23.7	6	302.9	6.5
														4.9	24.2	5.4	294.7	7.2
														6.1	24.4	4.3	293.3	8.2
														4.1	24.5	3.6	294.1	5.7
														2.1	25.3	2.5	295.4	3.7
														0.2	27.1	2.8	284.8	2
														1.9	27.6	3.1	303.8	3.4
														2.3	27.3	2.6	302.7	3.8
														4.9	26.3	2.3	298.2	7
														4.5	25.6	1.2	304.4	7.1
														4.3	24	1.4	302.9	8.5
														2.3	23.7	1.4	161.1	6.2
														2.1	23.1	2.8	135.5	5.2
														6.8	20.8	1.1	121.5	10.7
														5.8	19.8	0.3	323.7	7.8
														5.3	19.1	0.3	310.9	7.8
														7	18.5	0.7	329.5	10.2
														7.6	17.9	0.5	316.8	10.7
														6.2	17.9	0.9	113.3	9.4
														8.6	17.6	0.4	78.8	11.6
														9.1	17.2	0.1	118.4	11.9
														12.2	18.7	0.5	283.1	15.1
														7.4	21.9	0.6	104.4	9.7
														8.8	23.5	2	132.1	11
														8.8	25.5	1.4	126.1	12
														8.2	26.7	2.3	132.3	12.3
														6.1	27.8	2.1	118.3	10.3
														5.5	28.6	2.2	119.4	11.1
														5.2	29.1	3.1	125.1	14.4
														8.6	27.2	2.7	95.3	17.2
														5.5	19.4	2.4	324.1	12.7
														-0.1	19.8	0.9	98.6	4.3
														6.9	19.9	1.1	108.7	10.1
														8.6	19.5	0.4	163.8	11.2
														4.9	19.5	0.5	160.8	7.9
														5.3	19.4	0.2	108.6	8.5
														6.4	19.4	0.4	349.4	9.9
														4.1	19.2	0.6	76.9	7.5
														0.3	18.8	0.5	116.5	4
														0.5	18.5	0.4	81.8	4.3
														6.7	18.4	0.5	96.4	10
														4.4	18.2	0.4	355.6	7.9
														6	17.9	0.5	96.6	9.3
														4.3	17.7	0.7	308.5	8.6
														5.8	17.5	0.2	359	10.2
														10.7	18.7	0.1	274.5	14.6
														9.4	21.4	0.8	315.4	12.8
														2.6	23.7	1.7	291.7	5.7
														4	24.4	2.5	266.1	6.9
														6	24.9	2.5	265.9	8.6
														6.3	26	2.5	260.4	8.8
														1	27.3	2	248.8	3.9
														3.3	27.6	2.5	248.3	5.9
														7.5	24.7	3	229	10.6
														3.8	23.7	1.2	33.2	6.4
														2.1	20.1	1	99	8.4
														3.3	20.1	1	107.6	6.7
														6.1	19	1.6	108.2	7.8
														5.6	18.3	0.8	314.3	7.1
														4.1	18.5	0.8	127.6	5.6
														3.1	18.4	0.8	89	4.4
														-0.5	18.5	0.9	62.5	1.3
														1.6	18.6	0.6	135.3	3.7
														4.7	18.5	0.7	92.8	7.3
														3.5	18.5	0.9	99.1	6.6
														3.2	18.7	0.7	104.6	6.4
														7.6	18.5	0.4	352.4	11.3
														7	18.5	0.7	328.5	11.7
														5.7	18.3	1	310.1	7.7
														5.9	18.6	0.4	313.6	6.7
														7.3	20.9	1.9	294.2	9.3
														6.8	22.5	2.6	278.7	11.2
														7.6	23.1	2.3	264.3	12
														7.6	24.1	2.4	280.7	12.1
														7.2	25.1	2	252	11.4
														4	26.4	1.7	256.1	8.9
														4.1	22.4	1.7	139.3	8.1
														5.4	19.7	1.4	317.7	9.8
														4.1	22.1	0.6	324.7	7.3
														5.6	23.5	0.8	119.8	8.2
														6.7	24.6	1.1	26.5	10.1
														7.4	23.6	0.9	32.7	10.5
														4.9	22.1	0.6	61.4	7.6
														3.5	21	0.7	101.5	6.7
														3.1	20.1	0.6	107.6	7.2
														2.7	19.6	0.6	118.1	7.4
														1.7	18.8	0.3	101.5	6.7
														1.3	18.6	0.3	217	6.7
														2.8	17.9	0	353	8.2
														3.3	17.3	0.6	336	8.7
														4.5	16.6	0.6	325.2	9.9
														4.5	16.3	0.8	322.6	10
														6.1	16	0.7	304.3	11.4
														11.3	18.2	1.1	311.7	17
														9.6	20.7	2.8	294.9	14.7
														4.4	22.6	3	288.7	10.2
														8.4	23.6	2.7	257	14
														5.9	24.3	2.1	266.5	12.3
														2.4	25.7	1.8	261.2	9.6
														5.9	27.1	2.6	221.3	13
														5.8	28.4	2.2	215	11.7
														4.5	29.2	1.9	232.5	10.2
														4.8	29.9	1.6	252.6	9.7
														6.7	30.1	1.9	272.7	11.1
														6.2	29.2	1.5	241.5	11.1
														5.2	28.4	1.3	193	11.1
														7.9	25.6	1.8	123.3	14.2
														8.3	23.9	0.7	108.3	13.9
														8.2	23.1	0.7	84.2	12.1
														10	21.8	0.2	9	13
														7.2	21	0.5	329.5	10.5
														6.1	20.4	0.7	327.4	9.5
														8.8	19.9	0.7	324.6	12.9
														8.1	20.1	0.4	355	12.4
														10.3	20.2	0.1	354.2	14.7
														11.2	20.7	0.7	288.4	15.5
														9.2	20.9	1.2	293.4	13.8
														8.5	21.4	1.9	292.5	14
														5.1	23	3.3	295.9	11.5
														5.8	24.5	3	290.5	11.4
														7.2	26.2	2.5	282.1	12.2
														8.6	27.3	1.9	265.8	13.9
														8	28.1	2.7	265.4	14.2
														7.8	29.4	2.4	265.4	15.5
														6.4	30.6	2.1	261.1	15.8
														6.9	30.6	2.3	289	17.5
														7.1	31.9	2.7	234.3	18.4
														8.4	31.3	3.5	187.1	20.7
														9	28.7	2.8	133.5	23.2
														9.9	25	2.5	112.1	17.3
														13.2	23.2	2.5	113.1	19.9
														16.9	22.4	2.8	117.3	23.8
														15.3	21.7	2.5	115.8	22.5
														12.1	20.8	2.1	119.4	17.8
														9.5	20.4	2	121.9	16
														7.3	20.4	1.7	117.8	12.9
														5.1	20.3	1.8	117.4	10.4
														8	19.9	1.6	121.8	11.2
														6.6	19.8	1.8	122.9	10.2
														7.3	19.5	1.5	117.9	11.8
														7.6	19.4	1.3	119.1	13.2
														12.6	19.7	1.7	120.3	18.8
														15.1	20.8	2.5	127.8	20.7
														13.3	23	2.2	137	18.7
														12.6	25.9	0.2	163.7	19
														12.5	27.7	1.5	252.2	22.2
														11	29.1	2.2	265.2	25.1
														8.2	30.1	2.2	268.8	18.7
														5.3	30.5	1.3	274.2	13.2
														10.7	31.6	2	258.7	18.8
														10.3	32.1	2.1	256	19.9
														7.3	31.6	3.2	152.8	18.3
														7.6	28.6	3.4	118.5	18.9
														11.7	26.3	2.4	114.8	21.6
														14.1	24.6	1.8	118.7	23.3
														12.6	23.5	1.6	122.7	21
														9.4	22.7	2	122.9	17.3
														9.5	22	1.5	119.9	17.5
														5.9	21.1	1.5	124.5	14.4
														8.4	20.5	1	123.5	16.8
														9.2	20.3	0.6	93.5	17.6
														8.9	19.5	0.5	338	16.9
														10.6	19	0.2	48.8	17.7
														10.8	18.6	0.3	20.1	17.7
														8.9	18.2	0.3	333.8	15.7
														14	19.3	0.5	124.2	21.4
														14.1	22	0.9	297.1	21.6
														14.6	24.5	2.3	279.7	23.1
														13.5	26.2	3	275.2	21.4
														10.6	27.4	2.4	262.9	18.2
														10.4	28.4	2.7	271.1	18.1
														10.5	29.7	1.9	245.3	18.8
														6.1	30.8	2	255.2	15.9
														12	31.4	2.5	221.2	21.3
														12.5	31.7	2.2	172.1	22.7
														12.8	31.7	2.1	146.3	23
														13.7	30.4	1.9	113.4	24.2
														13.5	29.1	1.9	112.7	22.9
														11.2	27.1	1.5	73.2	19.4
														9.3	25	1	91.3	15.6
														4.1	23.4	1.6	119.2	10.3
														4.2	22.2	1.1	127.7	10.2
														4.3	21.6	0.8	122.6	10.4
