# Supplementary material for: Black Carbon Emission, Transport and Effect on Radiation Forcing Modelling During the Summer 2019–2020 Wildfires in Southeast Australia
Source: Preprints.org preprint supplement (doi:10.20944/preprints202302.0293.v1), 2023-02-17
Supplement: Supplementary file 3 [file dec2019_107.xlsx]

## Sheet: dec2019_107
Date_time	Datetime (AEST)	dust_1	PM10	PM2.5	BC	NO2	NO	Temp2m	U	V	Temp2m(C)	Wsp(pred)	Wdr(pred)	PM2.5 (obs)	Temperature(obs)	Wsp(obs)	Wdr(obs)	PM10 (obs)		Date	Predicted PM₂ι₅	Observed PM₂ι₅	Predicted_BC	Predicted_toan_BC(micrograms/m3)	Predicted_BC_toan	Observed_BC (nanograms/m3)	Observed_BC (micrograms.m3)		PM25_cor	PM25_IOA	PM25(P-O)^2	(P-O)+(O-O)^2	PM25_Obs_avg		PM25(P-O)^2	(P-O)+(O-O)^2	PM25_Obs_avg		Temp(P-O)^2	(P-O)+(O-O)^2	Temp_Obs_avg		Wsp(P-O)^2	(P-O)+(O-O)^2	Wsp_Obs_avg
2019-12-01_00:00:00	2019-12-01 10:00:00	0	0	0	0	0	0	294.72	-0.55	-1.42	21.57	1.52279	21.1727	7.8	18.8	1.6	345.9	24.2		2019-12-01	13.3714	20.5929	0.780714	0.575851	575.851	675.5	0.6755		0.237067	0.397667	52.149	804.5	31.1648		60.84	3485.72	33.4206		7.6729	17.8084	22.2946		0.00596085	0.986459	2.05839
2019-12-01_01:00:00	2019-12-01 11:00:00	0	0	0	0	0	0	294.09	-2.17	-2.23	20.94	3.11156	44.2189	7.5	20.6	2.8	23.7	33.7		2019-12-02	16.9029	59.8292	0.752083	0.586623	586.623	2768.14	2.76814		0.601933	0.6126	1842.66	1842.66			56.25	3521.24			0.1156	9.3025			0.0970691	3.22403
2019-12-01_02:00:00	2019-12-01 12:00:00	0	0.01	0.01	0	0	0	295.88	-2.05	-2.67	22.73	3.36621	37.5168	9.3	21.9	3.4	30	44.1		2019-12-03	41.0025	157.037	1.88125	1.46317	1463.17	5487.92	5.48792				13464.1	18417.7			86.3041	3309.7			0.6889	0.6889			0.00114146	7.02364
2019-12-01_03:00:00	2019-12-01 13:00:00	0	0.14	0.13	0.01	0	0	296.16	-3.57	-2.44	23.01	4.32418	55.6486	13.2	23.2	3.8	65.7	49.8		2019-12-04	50.7967	109.504	2.58	2.0585	2058.5	4319.62	4.31963		Temp_cor	Temp_IOA	3446.57	9598.68			170.825	2863.32			0.0361	2.6244			0.274761	16.0655
2019-12-01_04:00:00	2019-12-01 14:00:00	0	0.29	0.2	0.01	0	0	296.03	-5.18	-2.07	22.88	5.57829	68.2178	18.3	23.5	4.3	77.3	41.1		2019-12-05	62.2029	95.9542	3.43083	2.69801	2698.01	4448.58	4.44858		0.825411	0.574948	1139.15	9183.21			327.61	2336.76			0.3844	3.2041			1.63402	33.204
2019-12-01_05:00:00	2019-12-01 15:00:00	0	3.89	3.3	0.19	0	0	296.91	-4.4	-2	23.76	4.83322	65.5562	11.6	23.7	4.6	71.8	46.5		2019-12-06	19.7358	30.35	0.99875	0.650477	650.477	2478.83	2.47883				112.661	149.871			68.89	2697.76			0.0036	8.2369			0.0543908	28.2728
2019-12-01_06:00:00	2019-12-01 16:00:00	0	4.65	3.77	0.21	0	0	297.97	-2.81	-1.2	24.82	3.0555	66.8754	13.5	23.5	4.6	79.4	50.6		2019-12-07	22.4875	36.9208	0.907083	0.804631	804.631	1527.46	1.52746		Wsp_cor	Wsp_IOA	208.321	208.321			94.6729	2457.18			1.7424	13.9129			2.38547	12.5281
2019-12-01_07:00:00	2019-12-01 17:00:00	0	4.87	3.9	0.21	0	0	298.84	-0.03	-0.31	25.69	0.311448	5.52762	15.3	22.6	3.7	83.9	49.5		2019-12-08	46.2421	12.3583	2.22292	1.6715	1671.5	389.042	0.389042		0.671113	0.685216	1148.11	1148.11			129.96	2269.57			9.5481	13.69			11.4823	11.4823
2019-12-01_08:00:00	2019-12-01 18:00:00	0	5.85	5.11	0.3	0	0	299.37	3.8	0.3	26.22	3.81182	265.486	12.3	21.8	2.7	68.5	45		2019-12-09	46.0325	21.3875	2.16375	1.68892	1688.92	938.261	0.938261				607.376	607.376			51.6961	2443.32			19.5364	19.5364			1.23615	5.73997
2019-12-01_09:00:00	2019-12-01 19:00:00	0	65.36	59.48	3.54	0.01	0	297.98	7.37	3.06	24.83	7.98001	247.452	11.4	21.4	2.4	59.6	47.4		2019-12-10	27.8929	81.6833	0.8	0.551793	551.793	4754.96	4.75496		BC_cor		2893.41	2893.41			2311.69	2311.69			11.7649	11.7649			31.1365	39.2378
2019-12-01_10:00:00	2019-12-01 20:00:00	0	57.9	52.69	3.08	0.01	0	292.18	5.31	4.15	19.03	6.73933	231.991	12.4	20.8	0.6	71.2	45.4		2019-12-11	13.03	12.1	0.122917	0.0944917	94.4917	454.042	0.454042		0.597174		0.8649	1383.69			1623.28	1623.28			3.1329	22.6576			37.6914	37.6914
2019-12-01_11:00:00	2019-12-01 21:00:00	0	42.94	39.11	2.26	0	0	291.4	4.61	1.43	18.25	4.8267	252.766	22.1	20.8	3.6	230.9	54.5		2019-12-12	12.5221	13.975	0.0325	0.0251548	25.1548	504.958	0.504958				2.11097	1283.85			289.34	289.34			6.5025	30.6916			1.50478	18.5821
2019-12-01_12:00:00	2019-12-01 22:00:00	0	11.77	10.73	0.62	0	0	291.35	5.01	-0.67	18.2	5.0546	277.617	82.4	20.4	5.1	263.1	128.1		2019-12-13	9.905	7.50833	0.00875	0.00677245	6.77245	592.125	0.592125				5.74401	2017.33			5136.59	5136.59			4.84	35.8801			0.00206099	36.4647
2019-12-01_13:00:00	2019-12-01 23:00:00	0	9.61	8.77	0.5	0	0	291.07	5.14	-1.58	17.92	5.37736	287.087	51.2	19.6	4.5	276.1	27.3		2019-12-14	11.2304	27.225	0.18	0.139641	139.641	1327.22	1.32722				255.827	569.9			1800.3	1800.3			2.8224	49.9849			0.76976	33.1933
2019-12-01_14:00:00	2019-12-02 00:00:00	0	4.45	4.06	0.23	0	0	290.93	4.86	-2.17	17.78	5.32245	294.061	21	19.5	4.7	281.7	48.8		2019-12-15	14.1092	31.9958	0.550417	0.470524	470.524	800	0.8				319.933	319.933			286.964	1745.57			2.9584	53.4361			0.387447	34.8862
2019-12-01_15:00:00	2019-12-02 01:00:00	0	2.54	2.32	0.13	0	0	290.64	3.47	-2.14	17.49	4.07682	301.663	20.8	18.9	3.7	272.1	43.7		2019-12-16	8.96875	19.6625	0.227917	0.131579	131.579	305.091	0.305091				114.356	1135.47			341.51	1911.44			1.9881	67.24			0.141997	13.4016
2019-12-01_16:00:00	2019-12-02 02:00:00	0	3.49	3.17	0.18	0	0	290.47	3.34	-2.72	17.32	4.30744	309.158	15.8	18.6	5.1	286	13.6		2019-12-17	9.81583	6.39167	0.119583	0.0925568	92.5568	980.917	0.980917				11.7249	2127.1			159.517	2291.54			1.6384	75.1689			0.628159	27.9993
2019-12-01_17:00:00	2019-12-02 03:00:00	0.26	5.33	3.18	0.16	0	0	290.2	4.89	-1.99	17.05	5.27941	292.144	6	17.5	4.9	292.5	8		2019-12-18	8.98875	14.3083	0.167917	0.156734	156.734	1727.42	1.72742				28.298	1523.41			7.9524	3324.68			0.2025	100.802			0.143954	36.765
2019-12-01_18:00:00	2019-12-02 04:00:00	0.54	7.41	3.4	0.14	0	0	289.56	4.39	0.17	16.41	4.39329	267.782	1.6	16.7	3	306	4.9		2019-12-19	38.4262	47.5083	1.78125	1.45898	1458.98	3228.17	3.22817				82.4842	557.271			3.24	3824.19			0.0841	131.79			1.94126	10.7406
2019-12-01_19:00:00	2019-12-02 05:00:00	0.43	7.94	4.55	0.22	0	0	288.74	1.35	-0.05	15.59	1.35093	272.121	5.4	15.9	1.9	330.9	29.3		2019-12-20	25.6038	10.925	0.9	0.593718	593.718	1009.92	1.00992				215.466	665.601			0.7225	3236.47			0.0961	171.61			0.301483	0.748354
2019-12-01_20:00:00	2019-12-02 06:00:00	0.58	8.02	3.76	0.16	0	0	289.2	1.16	-3.25	16.05	3.45081	340.357	14.6	15.9	0.5	251.4	31		2019-12-21	35.8496	37.4958	0.98125	0.795279	795.279	1536.92	1.53692				2.71014	121.383			117.506	2350.31			0.0225	159.77			8.70729	8.70729
2019-12-01_21:00:00	2019-12-02 07:00:00	0.41	5.46	2.23	0.08	0	0	289.94	3.84	-3.49	16.79	5.189	312.266	38.9	16.6	1.6	254	80.2		2019-12-22	18.3029	17.4833	0.481667	0.332495	332.495	291.208	0.291208				0.671717	704.464			1344.69	1344.69			0.0361	125.44			12.8809	12.8809
2019-12-01_22:00:00	2019-12-02 08:00:00	0.6	6.46	1.89	0.03	0	0	291.28	5.32	-2.64	18.13	5.93902	296.392	64.2	17.3	3.3	293.3	49.5		2019-12-23	9.50167	15.65	0.0808333	0.0644995	64.4995	621.87	0.62187				37.802	1382.08			3882.54	3882.54			0.6889	83.9056			6.96444	26.2454
2019-12-01_23:00:00	2019-12-02 09:00:00	0.36	4.81	1.52	0.02	0	0	292.9	6.52	-0.95	19.75	6.58885	278.29	28.7	18.2	4.7	278.4	0.6		2019-12-24	8.84917	13.2042	0.025	0.0174149	17.4149	986.542	0.986542				18.966	1622.05			738.752	1341.02			2.4025	44.0896			3.56774	51.4497
2019-12-02_00:00:00	2019-12-02 10:00:00	0.34	5.48	1.75	0.02	0	0	293.57	6.63	0.05	20.42	6.63019	269.568	23.8	19.5	6.1	252.8	60.2		2019-12-25	9.33042	16.8042	0	0	0	642.875	0.642875				55.8569	1309.96			486.203	1704.86			0.8464	21.8089			0.2811	74.2042
2019-12-02_01:00:00	2019-12-02 11:00:00	0.11	6.33	2.79	0.06	0	0	294.16	7.2	-0.28	21.01	7.20544	272.227	26.7	20.3	4.7	277.9	29.3		2019-12-26	5.12167	10.9625	0.00916667	0.00709494	7.09494	542.667	0.542667				34.1153	2138.49			571.688	1395.02			0.5041	10.7584			6.27724	60.6754
2019-12-02_02:00:00	2019-12-02 12:00:00	0.01	11.06	5.02	0.1	0	0	294.69	7.81	-0.09	21.54	7.81052	270.66	16.2	19.7	6.6	286.2	31.6		2019-12-27	4.96708	5.62917	0.0333333	0.0309598	30.9598	636.167	0.636167				0.438354	2676.17			124.992	2081.18			3.3856	11.2225			1.46536	105.977
2019-12-02_03:00:00	2019-12-02 13:00:00	0	23.91	9.85	0.17	0	0	294.91	8.68	0.79	21.76	8.71588	264.8	10.5	19.8	7	273.6	17.3		2019-12-28	12.5333	11.85	0.380417	0.301535	301.535	769.75	0.76975				0.466944	1439.8			0.4225	2161.32			3.8416	9.1809			2.94423	134.557
2019-12-02_04:00:00	2019-12-02 14:00:00	0	27.16	17.34	0.75	0	0	294.67	9.27	1.53	21.52	9.39541	260.628	10.2	21	6.5	265.1	60.9		2019-12-29	34.385	20.825	1.45625	1.11842	1118.42	971.833	0.971833				183.874	183.874			50.9796	1544.49			0.2704	4.2849			8.38342	138.755
2019-12-02_05:00:00	2019-12-02 15:00:00	0	42.27	29.02	1.35	0	0	294.27	8.89	1.59	21.12	9.03107	259.86	76.6	20.3	5.9	253.8	211.7		2019-12-30	24.7271	17.5875	0.95125	0.780444	780.444	1008.35	1.00835				50.9737	400.537			2263.86	2263.86			0.6724	10.0489			9.80359	116.966
2019-12-02_06:00:00	2019-12-02 16:00:00	0	50.37	32.86	1.47	0	0	293.89	9	1.81	20.74	9.1802	258.629	137.2	19.4	6	236.4	190.9		2019-12-31	18.7888	12.5625	0.682917	0.491809	491.809	2999.2	2.9992				38.7662	959.559			10886.8	10886.8			1.7956	19.8025			10.1137	122.417
2019-12-02_07:00:00	2019-12-02 17:00:00	0	69.63	43.46	1.91	0	0	293.4	8.64	1.96	20.25	8.85953	257.219	125.5	18.7	7.2	266.8	152.8		2020-01-01	30.06	0									903.604	1041.22			6730.56	10428.5			2.4025	31.8096			2.75403	142.648
2019-12-02_08:00:00	2019-12-02 18:00:00	0	59.84	42.14	2.05	0	0	293.01	8.12	2.33	19.86	8.44768	253.989	114.1	17.8	6.3	250.1	175													27279.6	70417			5178.24	7992.36			4.2436	48.0249			4.61253	113.033
2019-12-02_09:00:00	2019-12-02 19:00:00	0	61.55	45.37	2.27	0	0	292.22	7.09	1.89	19.07	7.33759	255.074	178.7	17.8	4.5	250.7	256.3																	17776.9	24721.3			1.6129	59.5984			8.05191	59.6229
2019-12-02_10:00:00	2019-12-02 20:00:00	0	81.36	63.58	3.3	0.01	0	291.67	4.52	0.08	18.52	4.52071	268.986	164.4	17.4	5.4	247.4	91.1																	10164.7	25966.1			1.2544	75.1689			0.773155	33.6946
2019-12-02_11:00:00	2019-12-02 21:00:00	0	52.46	36.3	1.67	0	0	290.87	4.13	-0.84	17.72	4.21456	281.497	106.8	17	4.8	247.1	73.9																	4970.25	5815.59			0.5184	97.4169			0.342742	23.9959
2019-12-02_12:00:00	2019-12-02 22:00:00	0	43.21	25.66	0.97	0	0	290.14	3.77	-1.28	16.99	3.98137	288.754	92.5	15.6	1.2	274.8	136.9																	4467.59	4467.59			1.9321	144			7.73601	7.73601
2019-12-02_13:00:00	2019-12-02 23:00:00	0	39.8	20.45	0.61	0	0	289.48	3.29	-1.38	16.33	3.5677	292.756	135.7	14.2	1	25.3	144																	13282.6	13282.6			4.5369	197.684			6.5931	6.5931
2019-12-02_14:00:00	2019-12-03 00:00:00	0	40.7	17.97	0.37	0	0	289.01	2.91	-1.3	15.86	3.18718	294.072	101.2	13.1	0.6	346.1	27.9																	6927.23	6927.23			7.6176	244.297			6.69349	6.69349
2019-12-02_15:00:00	2019-12-03 01:00:00	0	43.04	17.62	0.28	0	0	288.61	2.82	-0.84	15.46	2.94245	286.587	45.3	13.5	1.2	283	20.7																	766.182	766.182			3.8416	244.297			3.03612	3.03612
2019-12-02_16:00:00	2019-12-03 02:00:00	0	46.01	19.28	0.34	0	0	288.27	2.35	-0.12	15.12	2.35306	272.923	29.7	13.1	0.5	19.7	21.7																	108.576	318.98			4.0804	267.977			3.43384	3.43384
2019-12-02_17:00:00	2019-12-03 03:00:00	0	50.18	22.41	0.49	0	0	287.78	1.45	-0.23	14.63	1.46813	279.013	22.5	10.9	0.1	205.8	20.6																	0.0081	480.925			13.9129	363.284			1.87177	6.49165
2019-12-02_18:00:00	2019-12-03 04:00:00	0	53.11	24.24	0.57	0	0	287.39	0.83	-1.07	14.24	1.35418	322.199	18.1	10.9	0.8	278.3	16.8																	37.6996	600.25			11.1556	378.302			0.307114	3.84874
2019-12-02_19:00:00	2019-12-03 05:00:00	0	52.03	22.96	0.48	0	0	287.1	0.16	-1.84	13.95	1.84694	355.03	18.7	11.6	0.3	245.8	16.1																	18.1476	634.032			5.5225	362.522			2.39303	3.87718
2019-12-02_20:00:00	2019-12-03 06:00:00	0	48.27	20.3	0.35	0	0	288	-0.07	-1.7	14.85	1.70144	2.35798	18.8	12	0.8	255.3	31.3																	2.25	769.508			8.1225	314.708			0.812595	2.6068
2019-12-02_21:00:00	2019-12-03 07:00:00	0	42.11	16.97	0.22	0	0	289.53	0.75	-2.1	16.38	2.22991	340.346	17.3	15.4	1.1	303.3	46.3																	0.1089	1060.8			0.9604	164.096			1.2767	1.2767
2019-12-02_22:00:00	2019-12-03 08:00:00	0	36.54	14.49	0.16	0	0	290.78	2.02	-1.64	17.63	2.60192	309.073	46.9	17.8	2.2	258.6	134.8																	1050.41	1050.41			0.0289	83.9056			0.161542	0.470489
2019-12-02_23:00:00	2019-12-03 09:00:00	0	34.6	13.5	0.12	0	0	292.43	1.85	-1.51	19.28	2.38801	309.222	127.5	19.6	3.7	247.1	230.8																	12996	12996			0.1024	32.6041			1.72131	3.88883
2019-12-03_00:00:00	2019-12-03 10:00:00	0	30.42	11.97	0.09	0	0	294.39	1.8	0.23	21.24	1.81463	262.718	228.8	21.5	3.5	272.8	366.9																	47015.2	47015.2			0.0676	3.4225			2.84046	2.84046
2019-12-03_01:00:00	2019-12-03 11:00:00	0	26.77	11.38	0.14	0	0	296.43	1.68	1	23.28	1.9551	239.237	296.2	23	3.1	246.4	353.5																	81122.4	81122.4			0.0784	2.8561			1.31081	1.31081
2019-12-03_02:00:00	2019-12-03 12:00:00	0	23.27	12.32	0.35	0	0	298.9	2.52	0.85	25.75	2.65949	251.361	310.8	24.3	2.2	238.3	365.6																	89090.3	89090.3			2.1025	29.8116			0.211133	0.552781
2019-12-03_03:00:00	2019-12-03 13:00:00	0	56.93	45.3	2.41	0.01	0	300.47	4.08	1.23	27.32	4.26137	253.223	305.1	26	1.2	227.4	290.7																	67496	80406.3			1.7424	76.2129			9.372	9.372
2019-12-03_04:00:00	2019-12-03 14:00:00	0	96.52	81.41	4.57	0.01	0	301	4.51	1.13	27.85	4.64941	255.934	265.5	27.4	1	244	304.8																	33889.1	78439.2			0.2025	113.636			13.3182	13.3182
2019-12-03_05:00:00	2019-12-03 15:00:00	0	118.73	101.79	5.81	0.01	0.01	301.18	4.93	1.16	28.03	5.06463	256.759	290.2	28	2.3	232.4	370																	35498.3	105723			0.0009	130.874			7.64319	10.5536
2019-12-03_06:00:00	2019-12-03 16:00:00	0	113.31	97.05	5.54	0.01	0.01	300.84	5.37	1.13	27.69	5.4876	258.117	309.1	28.5	3	233.1	430.2																	44965.2	115131			0.6561	134.56			6.18817	19.1109
2019-12-03_07:00:00	2019-12-03 17:00:00	0	87.64	74.65	4.19	0.01	0	300.2	5.87	1.19	27.05	5.98941	258.54	372.1	28	4.1	239.7	509.1																	88476.5	144332			0.9025	109.412			3.56986	35.6816
2019-12-03_08:00:00	2019-12-03 18:00:00	0	71.92	59.13	3.17	0.01	0	299.14	5.96	0.88	25.99	6.02462	261.601	337.5	27.3	4.5	259	209.6																	77489.9	108761			1.7161	75.69			2.32445	41.0704
2019-12-03_09:00:00	2019-12-03 19:00:00	0	97.98	82.3	4.5	0.01	0	298.2	4.1	0.09	25.05	4.10099	268.742	191.3	25.9	3.9	261.4	46.7																	11881	42749.7			0.7225	40.4496			0.040396	15.0931
2019-12-03_10:00:00	2019-12-03 20:00:00	0	96.79	81.68	4.44	0.01	0	297.12	3.09	-0.83	23.97	3.19953	285.035	79.9	24.2	2.7	253.3	83.1																	3.1684	8975.67			0.0529	12.8164			0.249531	3.18098
2019-12-03_11:00:00	2019-12-03 21:00:00	0	71.27	58.24	3.02	0.01	0	295.9	3.49	-1.5	22.75	3.7987	293.258	102.8	23.1	2.6	262.8	187.2																	1985.59	8873.64			0.1225	1.5876			1.43687	5.21071
2019-12-03_12:00:00	2019-12-03 22:00:00	0	63.51	50.37	2.48	0.01	0	294.78	3.21	-2.02	21.63	3.79269	302.182	133.1	22.5	4.7	249.5	113.1																	6844.25	13602.6			0.7569	0.7569			0.823211	19.1554
2019-12-03_13:00:00	2019-12-03 23:00:00	0	39.11	26.73	1.06	0	0	294.05	3.31	-2.35	20.9	4.05938	305.374	100.5	21.6	3.8	242.2	78																	5442.01	5442.01			0.49	4.3681			0.0672802	14.0129
2019-12-03_14:00:00	2019-12-04 00:00:00	0	31.33	19.01	0.59	0	0	293.48	3.03	-2.46	20.33	3.90288	309.073	77.4	19.6	0.5	229.4	45.3																	3409.39	3409.39			0.5329	21.7156			11.5796	11.5796
2019-12-03_15:00:00	2019-12-04 01:00:00	0	30.98	18.24	0.53	0	0	292.86	2.71	-2.33	19.71	3.57393	310.688	61.2	17.6	0.1	341.9	51.8																	1845.56	1845.56			4.4521	52.9984			12.0682	12.0682
2019-12-03_16:00:00	2019-12-04 02:00:00	0	34.48	21.03	0.67	0	0	291.99	1.79	-1.84	18.84	2.56704	315.789	59.2	16.6	0.4	331.9	71.2																	1456.95	1456.95			5.0176	83.7225			4.69607	4.69607
2019-12-03_17:00:00	2019-12-04 03:00:00	0	38.8	24.58	0.85	0	0	291.09	0.73	-0.88	17.94	1.14337	320.323	79.3	15	0.3	356.1	92.6																	2994.28	2994.28			8.6436	135.723			0.711277	7.14294
2019-12-03_18:00:00	2019-12-04 04:00:00	0	49.96	34.33	1.39	0	0	290.83	1.03	0.1	17.68	1.03484	264.455	80.7	14.7	0.6	316	57.1																	2150.18	2322.28			8.8804	149.084			0.189088	6.15614
2019-12-03_19:00:00	2019-12-04 05:00:00	0	56.42	39.74	1.67	0	0	290.46	1.33	0.71	17.31	1.50765	241.905	59.3	14.9	0.7	271	24.4																	382.594	1036.84			5.8081	153.264			0.652294	3.64181
2019-12-03_20:00:00	2019-12-04 06:00:00	0	34.2	18.14	0.41	0	0	290.92	2.98	2.86	17.77	4.13038	226.177	39	14.9	0.2	219.7	44.9																	435.14	435.14			8.2369	142.086			15.4478	15.4478
2019-12-03_21:00:00	2019-12-04 07:00:00	0	33.18	18.15	0.43	0	0	291.05	2.96	2.23	17.9	3.70601	233.006	36.5	18.7	0.3	51.5	22.9																	336.723	336.723			0.64	63.8401			11.6009	11.6009
2019-12-03_22:00:00	2019-12-04 08:00:00	0	34.68	21.22	0.67	0	0	292.34	2.98	1.9	19.19	3.53418	237.479	22.5	21.8	0.1	95.7	29.5																	1.6384	534.534			6.8121	12.96			11.7936	11.7936
2019-12-03_23:00:00	2019-12-04 09:00:00	0	31.66	20.97	0.76	0	0	294.36	2.76	0.79	21.21	2.87084	254.027	48.1	23.4	1.7	275.2	134.9																	736.037	736.037			4.7961	4.7961			1.37086	1.37086
2019-12-04_00:00:00	2019-12-04 10:00:00	0	24.1	16.54	0.64	0	0	296.35	2.28	0.21	23.2	2.28965	264.738	114.6	24.8	0.5	222.3	172.9																	9615.76	9615.76			2.56	11.6281			3.20285	3.20285
2019-12-04_01:00:00	2019-12-04 11:00:00	0	15.88	11.46	0.48	0	0	298.32	2.16	0.79	25.17	2.29993	249.91	155.7	26.4	0.4	342.2	192.7																	20805.2	20805.2			1.5129	48.7204			3.60975	3.60975
2019-12-04_02:00:00	2019-12-04 12:00:00	0	31.99	27.05	1.46	0	0	300.14	3.1	1.79	26.99	3.57968	239.997	185.8	27.9	1.4	253.6	257.8																	25201.6	25201.6			0.8281	106.09			4.751	4.751
2019-12-04_03:00:00	2019-12-04 13:00:00	0	46.71	40.15	2.22	0	0	301.21	4.45	2.15	28.06	4.94217	244.213	241.3	29.3	2.5	263.4	414.9																	40461.3	46057.5			1.5376	163.073			5.96417	11.0634
2019-12-04_04:00:00	2019-12-04 14:00:00	0	63.81	55.28	3.11	0.01	0	301.71	5.03	1.82	28.56	5.34914	250.108	367.6	29.9	3.6	265.7	503																	97543.8	126764			1.7956	192.377			3.05949	23.3592
2019-12-04_05:00:00	2019-12-04 15:00:00	0	87.36	76.16	4.31	0.01	0	301.81	5.44	1.65	28.66	5.68473	253.127	430.9	30.1	3	244	463.5																	125840	193794			2.0736	200.789			7.20775	20.8732
2019-12-04_06:00:00	2019-12-04 16:00:00	0	104.41	91.09	5.14	0.01	0.01	301.51	5.57	1.54	28.36	5.77897	254.545	366.6	27.2	3.3	121.3	225.6																	75905.8	152764			1.3456	120.341			6.14529	24.6311
2019-12-04_07:00:00	2019-12-04 17:00:00	0	95.93	82.91	4.65	0.01	0	300.95	5.47	1.57	27.8	5.69085	253.985		24.2	3.8	115.5	154.9																	6874.07	6874.07			12.96	54.9081			3.57532	28.889
2019-12-04_08:00:00	2019-12-04 18:00:00	0	91.38	78.48	4.36	0.01	0	300.14	5.08	1.55	26.99	5.31121	253.032	75.1	22.2	3.5	112.1	35.9																	11.4244	7523.83			22.9441	22.9441			3.28046	22.045
2019-12-04_09:00:00	2019-12-04 19:00:00	0	115.11	100.34	5.61	0.01	0.01	299.26	3.04	1.2	26.11	3.26827	248.459	39.1	21.1	3	105	41.9																	3750.34	5270.76			25.1001	25.1001			0.0719697	4.63227
2019-12-04_10:00:00	2019-12-04 20:00:00	0	156.41	138.06	7.74	0.02	0.01	297.8	1.45	0.41	24.65	1.50685	254.211	22.7	20	1.8	124.4	19.2																	13307.9	13307.9			21.6225	21.6225			0.0859363	0.654722
2019-12-04_11:00:00	2019-12-04 21:00:00	0	133.77	117.37	6.43	0.01	0.01	296.34	1.23	-0.66	23.19	1.39589	298.217	22	18.9	0.8	144.9	16.1																	9095.44	9095.44			18.4041	18.4041			0.355081	3.68683
2019-12-04_12:00:00	2019-12-04 22:00:00	0	95.74	82.88	4.41	0.01	0	295.41	1.83	-0.83	22.26	2.00943	294.397	23.9	18	0.5	203	16.2																	3478.64	3478.64			18.1476	18.7489			2.27837	2.58107
2019-12-04_13:00:00	2019-12-04 23:00:00	0	77.79	65.94	3.39	0.01	0	294.11	1.82	-0.53	20.96	1.8956	286.236	19.6	16.9	0.5	256.5																		2147.4	2147.4			16.4836	45.2929			1.9477	2.95978
2019-12-04_14:00:00	2019-12-05 00:00:00	0	61.84	50.87	2.5	0.01	0	293.09	1.18	-0.56	19.94	1.30614	295.388	16.1	15.9	0.5	264																		1208.95	1208.95			16.3216	76.5625			0.649861	5.33546
2019-12-04_15:00:00	2019-12-05 01:00:00	0	44.73	34.53	1.57	0	0	292.26	0.87	-1.39	19.11	1.63982	327.958	17.1	15	0.2	312.1																		303.805	303.805			16.8921	109.83			2.07307	5.18101
2019-12-04_16:00:00	2019-12-05 02:00:00	0	34.79	24.82	1.01	0	0	291.5	0.87	-2.18	18.35	2.34719	338.244	20.2	14	0.2	184.4																		21.3444	476.112			18.9225	149.818			4.61042	4.61042
2019-12-04_17:00:00	2019-12-05 03:00:00	0	27.25	18.01	0.64	0	0	291	1.15	-2.42	17.85	2.67935	334.583	20.9	13.1	0.4	244.3																		8.3521	780.085			22.5625	186.05			5.19542	5.19542
2019-12-04_18:00:00	2019-12-05 04:00:00	0	23.01	14.57	0.47	0	0	291.11	1.4	-2.47	17.96	2.83917	330.455	20.4	12.4	0.2	190																		33.9889	1015.7			30.9136	202.493			6.96523	6.96523
2019-12-04_19:00:00	2019-12-05 05:00:00	0	21.44	13.12	0.4	0	0	291.13	1.47	-2.56	17.98	2.95203	330.135	25.5	11.9	0.2	171.8																		153.264	796.368			36.9664	216.384			7.57369	7.57369
2019-12-04_20:00:00	2019-12-05 06:00:00	0	21.33	12.84	0.39	0	0	292.23	0.99	-1.75	19.08	2.01062	330.503	26.1	12.8	0.6	238.4																		175.828	778.41			39.4384	161.544			1.98985	2.26616
2019-12-04_21:00:00	2019-12-05 07:00:00	0	22.83	13.97	0.44	0	0	294.96	1.42	-1.23	21.81	1.87864	310.899	22.9	16.5	0.5	239.8																		79.7449	898.201			28.1961	39.4384			1.90066	3.01841
2019-12-04_22:00:00	2019-12-05 08:00:00	0	22.61	13.74	0.42	0	0	296.86	1.13	-0.77	23.71	1.36741	304.271	34.9	21.2	1.8	332.4																		447.746	447.746			6.3001	6.3001			0.187137	0.89983
2019-12-04_23:00:00	2019-12-05 09:00:00	0	19.13	11.31	0.31	0	0	298.65	1.28	-0.93	25.5	1.58218	306.001	41.9	24.2	1.7	324.8																		935.748	935.748			1.69	26.1121			0.0138811	0.695252
2019-12-05_00:00:00	2019-12-05 10:00:00	0	14.82	8.34	0.18	0	0	300.65	1.19	-1.41	27.5	1.84505	319.837	94.8	26.9	2	294.3																		7475.33	7475.33			0.36	96.2361			0.0240103	0.0734153
2019-12-05_01:00:00	2019-12-05 11:00:00	0	8.42	4.79	0.11	0	0	302.94	1.81	-1.17	29.79	2.15523	302.879	151.3	29.3	3.1	300																		21465.2	21465.2			0.2401	210.25			0.892598	1.29784
2019-12-05_02:00:00	2019-12-05 12:00:00	0	7.52	5.88	0.29	0	0	305.03	4.82	0.1	31.88	4.82104	268.811	154.4	31.5	4.7	267.9																		22058.2	22058.2			0.1444	353.064			0.01465	29.2144
2019-12-05_03:00:00	2019-12-05 13:00:00	0	20.94	18.29	1.05	0	0	305.55	6.51	0.47	32.4	6.52694	265.871	212.1	32.5	5	250.2																		37562.3	37562.3			0.01	412.496			2.33156	54.9221
2019-12-05_04:00:00	2019-12-05 14:00:00	0	25.51	22.05	1.26	0	0	305.68	6.74	0.69	32.53	6.77523	264.155	281	32.6	4.5	250.5																		67055.1	67055.1			0.0049	421.892			5.17666	51.2545
2019-12-05_05:00:00	2019-12-05 15:00:00	0.01	46.38	40.81	2.36	0	0	305.47	6.29	1.01	32.32	6.37057	260.878	329.3	32.4	4.1	250.6																		83226.5	91972.7			0.0064	405.217			5.1555	40.3806
2019-12-05_06:00:00	2019-12-05 16:00:00	0.02	51.56	45.79	2.66	0.01	0	305.13	6.16	0.88	31.98	6.22254	261.87	241.2	32.9	4.2	256.6																		38185.1	48466			0.8464	411.684			4.09067	39.7724
2019-12-05_07:00:00	2019-12-05 17:00:00	0.05	88.24	79.26	4.69	0.01	0	304.75	6.09	1.01	31.6	6.17318	260.583	168.1	32.7	3.6	259.8																		7892.55	32587.5			1.21	388.484			6.62128	32.0037
2019-12-05_08:00:00	2019-12-05 18:00:00	0.08	163.37	147.53	8.75	0.02	0.01	304.07	5.13	0.83	30.92	5.19671	260.81	110.2	32	2.6	267.5	87.1																	1393.53	36439			1.1664	335.989			6.74291	13.5476
2019-12-05_09:00:00	2019-12-05 19:00:00	0.09	353.34	320.72	18.91	0.04	0.02	302.38	2.2	-0.08	29.23	2.20145	272.083	61.6	30.8	2.3	266.4	108.7																	67143.2	99527.6			2.4649	238.394			0.0097113	0.148575
2019-12-05_10:00:00	2019-12-05 20:00:00	0.1	299.22	271.43	15.8	0.03	0.02	300.97	2.27	-0.79	27.82	2.40354	289.189	57.7	29.5	1.8	265.6	148																	45680.5	68796			2.8224	162.053			0.364259	0.364259
2019-12-05_11:00:00	2019-12-05 21:00:00	0.12	184.28	166.4	9.55	0.02	0.01	299.55	2.28	-0.46	26.4	2.32594	281.407	58.2	29	2.3	262	121.8																	11707.2	24888.2			6.76	116.856			0.000672918	0.260039
2019-12-05_12:00:00	2019-12-05 22:00:00	0.13	105.79	94.69	5.32	0.01	0.01	298.26	2.43	-0.52	25.11	2.48502	282.079	55.8	26.3	0.7	227.9	195.9																	1512.43	6997.32			1.4161	46.5124			3.18628	3.18628
2019-12-05_13:00:00	2019-12-05 23:00:00	0.12	66.73	59.11	3.26	0.01	0	296.98	1.98	-0.07	23.83	1.98124	272.025	81.2	22.8	0.5	76.6	159.2																	487.968	5397.84			1.0609	4.1616			2.19406	2.67245
2019-12-05_14:00:00	2019-12-06 00:00:00	0.1	77.82	69.51	3.82	0.01	0	295.76	1.33	0.77	22.61	1.53681	239.931		20.5	2.7	92.4	94.2																	4831.64	4831.64			4.4521	4.4521			1.353	1.353
2019-12-05_15:00:00	2019-12-06 01:00:00	0.08	72.24	64.74	3.57	0.01	0	294.8	1.08	0.88	21.65	1.39313	230.826		18.8	2.4	92.7	60.9																	4191.27	4191.27			8.1225	17.1396			1.0138	1.0138
2019-12-05_16:00:00	2019-12-06 02:00:00	0.07	60.23	53.95	2.98	0.01	0	294.03	0.95	0.66	20.88	1.15676	235.211	35.6	18	2.4	96	63.2																	336.723	515.744			8.2944	32.6041			1.54564	1.54564
2019-12-05_17:00:00	2019-12-06 03:00:00	0.06	55.66	49.85	2.73	0.01	0	293.48	-0.45	0.65	20.33	0.790569	145.305	32.8	17.6	2.3	99.7	48.7																	290.703	290.703			7.4529	44.3556			2.27838	2.27838
2019-12-05_18:00:00	2019-12-06 04:00:00	0.06	52.76	47.3	2.56	0.01	0	292.95	-0.89	0.28	19.8	0.933006	107.464	25.5	17.2	1.3	100.5	41.9																	475.24	475.24			6.76	57.6081			0.134685	3.54567
2019-12-05_19:00:00	2019-12-06 05:00:00	0.06	48.27	43.07	2.29	0	0	292.54	-0.65	0.24	19.39	0.692892	110.266	21.8	16	0.1	270.4	39.9																	452.413	452.413			11.4921	84.64			0.351522	11.043
2019-12-05_20:00:00	2019-12-06 06:00:00	0.06	46.56	41.31	2.13	0	0	293.44	-0.33	-0.21	20.29	0.391152	57.5289	19.8	15.9	0.6	246.4	51.6																	462.68	462.68			19.2721	70.56			0.0436174	9.76467
2019-12-05_21:00:00	2019-12-06 07:00:00	0.05	42.53	37.82	1.95	0	0	295.44	-0.52	-0.83	22.29	0.979439	32.0675	16.7	18.1	0.1	150.9	51.1																	446.054	446.054			17.5561	17.64			0.773412	9.22071
2019-12-05_22:00:00	2019-12-06 08:00:00	0.04	26.33	23.32	1.2	0	0	298.63	-0.54	-1.08	25.48	1.20748	26.5651	24.3	20.1	0.8	24	53.6																	0.9604	369.408			28.9444	28.9444			0.166037	4.44587
2019-12-05_23:00:00	2019-12-06 09:00:00	0.02	10.21	8.82	0.44	0	0	301.69	1.25	-1.54	28.54	1.98346	320.934	20.8	22.2	0.8	348.7	57.7																	143.52	1385.33			40.1956	40.1956			1.40057	1.77567
2019-12-06_00:00:00	2019-12-06 10:00:00	0	5.74	4.86	0.24	0	0	304.45	4.33	0.6	31.3	4.37137	262.111	27.1	23.8	0.2	130.1	59																	494.618	1216.61			56.25	110.46			17.4004	17.4004
2019-12-06_01:00:00	2019-12-06 11:00:00	0	0.51	0	0	0	0	299.63	-2.16	1.45	26.48	2.60156	123.873	29.3	25.2	0.7	140.6	63.2																	858.49	1409.25			1.6384	50.2681			3.61592	3.61592
2019-12-06_02:00:00	2019-12-06 12:00:00	0	0.79	0.01	0	0	0.01	300.18	-4.16	0.64	27.03	4.20894	98.746	24.8	26.4	1.1	104.4	63.8																	614.544	1766.52			0.3969	78.1456			9.66553	9.66553
2019-12-06_03:00:00	2019-12-06 13:00:00	0	0.97	0.12	0	0	0.01	299.8	-5.93	-1.18	26.65	6.04626	78.746	20.5	27.5	1.5	81.3	73.4																	415.344	2136.29			0.7225	91.3936			20.6685	20.6685
2019-12-06_04:00:00	2019-12-06 14:00:00	0	2.46	0.61	0	0	0	298.97	-6.67	-1.93	25.82	6.94362	73.8621	29	28.8	1.2	111.6	84.7																	805.992	1386.07			8.8804	100.601			32.9891	32.9891
2019-12-06_05:00:00	2019-12-06 15:00:00	0	4.2	1.2	0.01	0	0	298.49	-6.73	-2.41	25.34	7.1485	70.2978	51.7	30.4	0.9	139.4	141.9																	2550.25	2550.25			25.6036	124.323			39.0437	39.0437
2019-12-06_06:00:00	2019-12-06 16:00:00	0	5.59	1.64	0.01	0	0	297.84	-5.97	-2.07	24.69	6.31869	70.877	106.2	31.4	0.8	226.1	236.3																	10932.8	10932.8			45.0241	132.25			30.4559	30.4559
2019-12-06_07:00:00	2019-12-06 17:00:00	0	7.26	2.13	0.01	0	0.01	296.89	-5.43	-1.73	23.74	5.69893	72.3282	166.2	31.4	2	240.2	146.6																	26919	26919			58.6756	111.303			13.6821	13.6821
2019-12-06_08:00:00	2019-12-06 18:00:00	0	9.22	2.7	0	0	0.01	295.91	-4.49	-2.15	22.76	4.97821	64.4131		28.3	2.3	150.4	192.3																	7.29	4113.94			30.6916	41.8609			7.17282	9.99959
2019-12-06_09:00:00	2019-12-06 19:00:00	0	11.86	3.41	0	0	0.01	294.99	-3.43	-1.81	21.84	3.87827	62.1797		21.6	4.1	135.3	75.9																	11.6281	4023.36			0.0576	1.3225			0.0491629	14.9172
2019-12-06_10:00:00	2019-12-06 20:00:00	0	14.37	3.95	0	0	0.01	294.48	-2.43	-1.17	21.33	2.697	64.2902	23.7	20.6	3.5	128	47.5																	390.062	1535.86			0.5329	7.0756			0.644812	4.33055
2019-12-06_11:00:00	2019-12-06 21:00:00	0	16.34	4.33	0.01	0	0.02	294.1	-1.94	-0.37	20.95	1.97497	79.2023	19.3	19.9	2.8	133.7	26.7																	224.101	1867.1			1.1025	13.9876			0.680677	0.680677
2019-12-06_12:00:00	2019-12-06 22:00:00	0	16.42	4.41	0.01	0.01	0.02	293.65	-1.75	-0.59	20.5	1.84678	71.369	18.6	19.2	1	145.2	25.9																	201.356	1921.07			1.69	23.9121			0.717038	1.61092
2019-12-06_13:00:00	2019-12-06 23:00:00	0	18.35	4.6	0.01	0.01	0.03	293.14	-0.81	0.25	19.99	0.847703	107.152	14.7	19.3	0.6	152.6	28.5																	102.01	2260.05			0.4761	28.09			0.0613567	7.11981
2019-12-06_14:00:00	2019-12-07 00:00:00	0	20.14	4.77	0.02	0.01	0.04	292.8	-0.66	0.45	19.65	0.798812	124.287	13.8	19.3	0.8	132.5	29.4																	81.5409	2329.99			0.1225	31.8096			1.41225e-06	6.33624
2019-12-06_15:00:00	2019-12-07 01:00:00	0	20.33	4.81	0.02	0.01	0.05	292.51	-0.74	0.12	19.36	0.749667	99.2109	14.8	18.9	1	116.5	30.7																	99.8001	2230.67			0.2116	40.0689			0.0626668	5.59953
2019-12-06_16:00:00	2019-12-07 02:00:00	0	19.28	4.72	0.03	0.01	0.05	292.17	-0.55	-0.4	19.02	0.680074	53.9727	15.8	18.3	0.4	189.7	30.4																	122.766	2145.54			0.5184	52.8529			0.0784412	9.21685
2019-12-06_17:00:00	2019-12-07 03:00:00	0	18.29	4.7	0.04	0.01	0.04	291.8	-0.1	-0.59	18.65	0.598415	9.61981	13.6	17.5	0.3	181.3	32.2																	79.21	2356.13			1.3225	71.2336			0.0890513	10.3529
2019-12-06_18:00:00	2019-12-07 04:00:00	0	17.51	4.91	0.06	0.01	0.04	291.45	0.26	-0.66	18.3	0.709366	338.499	16.6	16.5	0.2	292.9	30.9																	136.656	2054.81			3.24	95.8441			0.259454	10.2825
2019-12-06_19:00:00	2019-12-07 05:00:00	0	16.91	5.27	0.09	0.01	0.03	291.21	0.22	-0.8	18.06	0.829699	344.624	22	15.4	0.4	225.3	32.6																	279.893	1565.78			7.0756	123.877			0.184641	8.33073
2019-12-06_20:00:00	2019-12-07 06:00:00	0	17.68	6.39	0.15	0.01	0.03	292.32	0.19	-0.82	19.17	0.841724	346.954	21.7	16	0.6	244.5	38.2																	234.396	1501.56			10.0489	88.7364			0.0584307	7.15175
2019-12-06_21:00:00	2019-12-07 07:00:00	0	22.61	13.35	0.53	0.01	0.02	293.77	-0.42	-1.36	20.62	1.42338	17.162	18.3	18.6	0	359.3	48.2																	24.5025	1238.34			4.0804	28.8369			2.026	7.25022
2019-12-06_22:00:00	2019-12-07 08:00:00	0	31.87	23.44	1.05	0.01	0.02	295.36	-0.28	-0.78	22.21	0.828734	19.7469	24.7	20	0.7	341	63.8																	1.5876	349.69			4.8841	5.6644			0.0165724	6.69395
2019-12-06_23:00:00	2019-12-07 09:00:00	0	40.76	32.28	1.49	0.01	0.02	297.15	-0.49	0.29	24	0.569386	120.618	42.1	21.9	1	3.2	96.5																	96.4324	96.4324			4.41	4.41			0.185429	6.48524
2019-12-07_00:00:00	2019-12-07 10:00:00	0	45.8	37.06	1.73	0.01	0.02	299.27	-0.85	0.67	26.12	1.08231	128.246	79.2	24	0.4	19.7	143.7																	1775.78	2442.34			4.4944	30.5809			0.46555	6.93631
2019-12-07_01:00:00	2019-12-07 11:00:00	0	49.8	41.56	1.95	0.01	0.02	301.78	-1.53	0.73	28.63	1.69523	115.507	100.6	26	1	353.1	127.7																	3485.72	5673.1			6.9169	100.802			0.483343	2.01859
2019-12-07_02:00:00	2019-12-07 12:00:00	0	43.18	36.33	1.71	0.01	0.02	303.98	-2.19	0.53	30.83	2.25322	103.604	100.7	27.1	1.3	306.4	150.7																	4143.5	4926.64			13.9129	177.956			0.908628	0.908628
2019-12-07_03:00:00	2019-12-07 13:00:00	0	39.8	33.22	1.55	0.01	0.02	305.09	-2.94	-0.05	31.94	2.94043	89.0258	105.5	27.5	3.7	89.9	134.1																	5224.4	5224.4			19.7136	220.522			0.576954	6.37272
2019-12-07_04:00:00	2019-12-07 14:00:00	0	43.07	34.77	1.57	0.01	0.02	304.98	-4.39	-1.05	31.83	4.51382	76.5488	81.4	26.2	4.9	95.5	88.6																	2174.36	2433.45			31.6969	180.634			0.149133	28.0669
2019-12-07_05:00:00	2019-12-07 15:00:00	0	45.09	34.72	1.5	0.01	0.02	304.1	-5.09	-1.88	30.95	5.42609	69.7283	56	25.3	5.2	97.1	61																	452.838	570.254			31.9225	135.956			0.0511187	42.3813
2019-12-07_06:00:00	2019-12-07 16:00:00	0	46.76	34.78	1.47	0.01	0.01	302.99	-5.32	-2.1	29.84	5.71948	68.4592	44.1	25	4.6	96.6	57.3																	86.8624	144.962			23.4256	105.063			1.25323	38.4831
2019-12-07_07:00:00	2019-12-07 17:00:00	0	45.04	30.98	1.21	0.01	0.01	301.12	-5.22	-2.79	27.97	5.91883	61.8764	41.3	24.8	3.9	99.7	55.6																	106.502	106.502			10.0489	66.9124			4.07566	32.5222
2019-12-07_08:00:00	2019-12-07 18:00:00	0	37.95	21.58	0.66	0	0.01	299.01	-4.5	-3.05	25.86	5.43622	55.8716	33.5	24.3	2.9	115.9	45.5																	142.086	142.086			2.4336	31.0249			6.43242	17.8103
2019-12-07_09:00:00	2019-12-07 19:00:00	0	34.47	17.66	0.46	0	0.01	297.26	-3.5	-3.14	24.11	4.70208	48.1035		22.3	2.7	125.2	51.5																	311.876	2418.67			3.2761	3.3124			4.00834	10.7984
2019-12-07_10:00:00	2019-12-07 20:00:00	0	34.1	16.59	0.43	0	0.02	296.4	-1.34	-2.19	23.25	2.56743	31.4614	8	21.1	2.2	132	37.6																	73.7881	1785.06			4.6225	4.6225			0.135005	0.424362
2019-12-07_11:00:00	2019-12-07 21:00:00	0	36.58	19.32	0.61	0.01	0.02	295.99	0.27	-1.49	22.84	1.51427	349.729	7.1	20.3	1.9	136.5	35																	149.328	1633.78			6.4516	6.4516			0.148791	0.492431
2019-12-07_12:00:00	2019-12-07 22:00:00	0	44.29	27.26	1.09	0.01	0.03	295.71	-0.22	-1.66	22.56	1.67451	7.5495	10.7	19.9	2.1	130.6	27.1																	274.234	834.054			7.0756	7.0756			0.181038	0.181038
2019-12-07_13:00:00	2019-12-07 23:00:00	0	66.75	49.23	2.35	0.01	0.03	295.52	-0.1	-2.02	22.37	2.02247	2.83419	14.6	19.8	2.1	126.8	27.7																	1199.24	1199.24			6.6049	6.6049			0.00601032	0.00601032
2019-12-07_14:00:00	2019-12-08 00:00:00	0	82.65	64.36	3.2	0.01	0.03	295.12	-0.24	-1.63	21.97	1.64757	8.37609	14.8	19.5	2.9	112.8	36.8																	2456.19	2456.19			6.1009	9.7344			1.56857	1.56857
2019-12-07_15:00:00	2019-12-08 01:00:00	0	79.91	62.73	3.11	0.01	0.03	294.55	-1.1	-1.63	21.4	1.96644	34.0134	15	19.3	1.9	106.6	38.9																	2278.15	2278.15			4.41	15.1321			0.00441474	0.0622785
2019-12-07_16:00:00	2019-12-08 02:00:00	0	75.7	59.95	2.96	0.01	0.03	293.93	-1.32	-1.67	20.78	2.12869	38.3236	14.4	19.2	1.6	98.6	38																	2074.8	2074.8			2.4964	21.2521			0.279508	0.279508
2019-12-07_17:00:00	2019-12-08 03:00:00	0	81.29	65.92	3.27	0.01	0.03	293.28	-0.99	-1.61	20.13	1.89003	31.5877	16.2	19.1	0.8	120.3	39.2																	2472.08	2472.08			1.0609	28.7296			1.18816	2.0334
2019-12-07_18:00:00	2019-12-08 04:00:00	0	94.52	78.72	3.93	0.02	0.03	292.48	-0.3	-1.35	19.33	1.38293	12.5289	15.5	18.2	0.4	162.4	35.3																	3996.77	3996.77			1.2769	49.8436			0.966155	5.44321
2019-12-07_19:00:00	2019-12-08 05:00:00	0	110.9	94.26	4.7	0.02	0.03	291.96	0.23	-0.93	18.81	0.958019	346.109	16.5	16.9	0.4	196.7	31.6																	6046.62	6046.62			3.6481	78.8544			0.311385	7.60646
2019-12-07_20:00:00	2019-12-08 06:00:00	0	120.01	103.35	5.13	0.02	0.03	293.08	0.19	-1.05	19.93	1.06705	349.743	13.4	17.3	0.5	230.6	34.8																	8091	8091			6.9169	54.1696			0.321548	6.49714
2019-12-07_21:00:00	2019-12-08 07:00:00	0	123.22	106.65	5.3	0.02	0.04	296.2	0.14	-1.13	23.05	1.13864	352.937	12.8	19.8	0.4	156.4	29.2																	8807.82	8807.82			10.5625	10.5625			0.545588	6.64279
2019-12-07_22:00:00	2019-12-08 08:00:00	0	107.21	93.21	4.63	0.02	0.04	299.98	0.43	-0.53	26.83	0.682495	320.947	16.3	21.2	1.8	66.1	23.6																	5915.15	5915.15			31.6969	31.6969			1.24882	2.66834
2019-12-07_23:00:00	2019-12-08 09:00:00	0	84.07	73	3.63	0.01	0.03	304.46	0.31	-0.92	31.31	0.970824	341.378	13.7	21.8	2.8	66.6	27																	3516.49	3516.49			90.4401	90.4401			3.34588	3.34588
2019-12-08_00:00:00	2019-12-08 10:00:00	0	47.15	41.32	2.05	0.01	0.02	308.99	0.83	-1.21	35.84	1.46731	325.552	8.5	22.1	2.8	62.9	27.4																	1077.15	1077.15			188.788	188.788			1.77606	1.77606
2019-12-08_01:00:00	2019-12-08 11:00:00	0	17.2	15.26	0.71	0	0.01	311.51	1.41	-0.68	38.36	1.56541	295.747	8.5	23	3.3	71.6	24.8																	45.6976	1855.89			235.93	281.233			3.00881	3.00881
2019-12-08_02:00:00	2019-12-08 12:00:00	0.15	13.58	11.36	0.53	0	0	312.51	1.13	-0.31	39.36	1.17175	285.341	9.4	23.9	3.4	72.2	28.9																	3.8416	2123.37			239.012	348.569			4.96509	4.96509
2019-12-08_03:00:00	2019-12-08 13:00:00	0.29	12.54	9.82	0.45	0	0	313.2	0.11	-1.23	40.05	1.23491	354.89	12.5	24.8	3.6	82.2	33.5																	7.1824	1982.03			232.563	410.468			5.59366	5.59366
2019-12-08_04:00:00	2019-12-08 14:00:00	0.34	12.96	9.98	0.46	0	0	313.76	-1.22	-1.85	40.61	2.21606	33.4033	16.8	24.9	4.6	83.2	63.6																	46.5124	1604.8			246.804	437.646			5.68319	7.2903
2019-12-08_05:00:00	2019-12-08 15:00:00	0.26	18.4	15.1	0.72	0	0.01	313.45	-3.31	-2.18	40.3	3.9634	56.6308	15.6	24.3	4.8	79	37.7																	0.25	1306.1			256	400.4			0.699908	21.5983
2019-12-08_06:00:00	2019-12-08 16:00:00	0.01	31	25.99	1.26	0.01	0.01	310.19	-5.47	-0.68	37.04	5.5121	82.9138	13.3	23.7	4.9	70.4	30.2																	161.036	759.003			177.956	260.823			0.374672	39.6409
2019-12-08_07:00:00	2019-12-08 17:00:00	0.01	32.89	26.28	1.22	0.01	0.01	308.42	-4.05	-0.8	35.27	4.12826	78.8263	11.1	22.9	4.4	72.3	29																	230.432	867.892			153.017	184.416			0.0738446	19.468
2019-12-08_08:00:00	2019-12-08 18:00:00	0	33.54	24.71	1.03	0.01	0.02	306.07	-4.72	-3.53	32.92	5.89401	53.208	8.3	22.2	4	71.3	29.7																	269.288	1144.47			114.918	114.918			3.58726	33.3853
2019-12-08_09:00:00	2019-12-08 19:00:00	0	28.22	21.28	0.85	0	0.01	304.13	-4.07	-4.27	30.98	5.89897	43.6264	10.5	21.7	3.3	57.4	26																	116.208	1229.2			86.1184	86.1184			6.75462	25.8365
2019-12-08_10:00:00	2019-12-08 20:00:00	0	27.46	20.94	0.87	0	0.01	303.91	-3.06	-4.27	30.76	5.25324	35.6265	12.2	21.1	3	50.4	24.5																	76.3876	1135.69			93.3156	93.3156			5.07708	17.1167
2019-12-08_11:00:00	2019-12-08 21:00:00	0	29.74	22.07	0.93	0.01	0.02	302.58	-0.79	-2.07	29.43	2.21563	20.8891	8.5		2.5	59	25.2																	184.145	1315.51			866.125	866.125			0.0808684	0.359552
2019-12-08_12:00:00	2019-12-08 22:00:00	0	40.2	27.14	1.09	0.01	0.04	301	-0.36	3.87	27.85	3.88671	174.685	4.3		1.4	56.2	25.6																	521.666	1253.16			775.623	775.623			6.18372	6.18372
2019-12-08_13:00:00	2019-12-08 23:00:00	0.01	52.44	36.41	1.32	0.01	0.04	298.32	-3.17	2.74	25.17	4.19005	130.838	8.5		1.3	62.3	25.2																	778.968	778.968			633.529	633.529			8.35238	8.35238
2019-12-08_14:00:00	2019-12-09 00:00:00	0.03	63.44	46.37	1.68	0.01	0.03	296.48	-3.05	3.14	23.33	4.37745	135.833	9.5		1.1	87.7	25.1																	1359.4	1359.4			544.289	544.289			10.7417	10.7417
2019-12-08_15:00:00	2019-12-09 01:00:00	0.04	64.43	46.91	1.67	0.01	0.03	295.44	-1.87	2.88	22.29	3.43385	147.004	9		1.5	48.2	24.9																	1437.17	1437.17			496.844	497.29			3.73976	3.73976
2019-12-08_16:00:00	2019-12-09 02:00:00	0.04	63.04	45.47	1.59	0.01	0.03	294.72	-1.36	2.74	21.57	3.05895	153.602	8.5		1.7	54.2	25																	1366.78	1366.78			465.265	529.92			1.84676	1.84676
2019-12-08_17:00:00	2019-12-09 03:00:00	0.03	60.49	42.26	1.42	0.01	0.03	294.11	-0.79	1.85	20.96	2.01162	156.876	7.1		1.5	64.4	26.7																	1236.23	1236.23			439.322	558.377			0.261751	0.36528
2019-12-08_18:00:00	2019-12-09 04:00:00	0.02	57.42	37.8	1.19	0.01	0.03	293.87	-0.64	1.95	20.72	2.05234	161.83	10.8		1.6	88.6	29																	729	729			429.318	569.777			0.204612	0.21498
2019-12-08_19:00:00	2019-12-09 05:00:00	0.02	55.77	33.88	0.97	0.01	0.04	293.91	-0.11	1.71	20.76	1.71353	176.319	8.3		1.1	87.4	33.2																	654.336	654.336			430.978	567.869			0.376424	1.69642
2019-12-08_20:00:00	2019-12-09 06:00:00	0.01	54.08	31.72	0.87	0.01	0.04	293.83	0.41	0.96	20.68	1.04389	203.126	11.2		1.2	73.3	34.8																	421.07	572.166			427.662	571.688			0.0243713	3.50481
2019-12-08_21:00:00	2019-12-09 07:00:00	0.01	52.29	30.85	0.86	0.01	0.04	294.4	0.06	0.35	21.25	0.355106	189.728	12.3		1.9	36.9	36.7																	344.103	561.216			451.562	544.756			2.3867	3.46293
2019-12-08_22:00:00	2019-12-09 08:00:00	0.02	50.65	31.43	0.96	0.01	0.04	296.86	-0.89	0.08	23.71	0.893588	95.1362	10.6		2.3	36.8	38.1																	433.889	615.536			562.164	562.164			1.97799	1.97799
2019-12-08_23:00:00	2019-12-09 09:00:00	0.04	46.52	30.42	1.03	0.01	0.04	300.94	-0.61	-0.47	27.79	0.770065	52.3862	21.5		2.5	34.6	42.9																	79.5664	222.606			772.284	772.284			2.99268	2.99268
2019-12-09_00:00:00	2019-12-09 10:00:00	0.05	38.8	27.67	1.07	0.01	0.03	305.71	-0.4	-1.05	32.56	1.12361	20.8546	29.1		2.4	13.6	66.7																	2.0449	101.405			1060.15	1060.15			1.62917	1.62917
2019-12-09_01:00:00	2019-12-09 11:00:00	0.05	27.14	21.15	0.94	0.01	0.02	310.21	-0.59	-1.6	37.06	1.70532	20.2415	47.2		2	26.1	79.3																	678.603	678.603			1373.44	1373.44			0.0868391	0.168662
2019-12-09_02:00:00	2019-12-09 12:00:00	0.3	11.48	8.28	0.43	0	0	314	0.35	-2.02	40.85	2.0501	350.17	52.7		2.7	64.1	86.8																	1973.14	1973.14			1668.72	1668.72			0.422373	0.422373
2019-12-09_03:00:00	2019-12-09 13:00:00	0.4	24.1	18.4	1.01	0	0.01	314.45	-1.55	-1.6	41.3	2.22767	44.0907	49.6		4.2	83.8	58.7																	973.44	973.44			1705.69	1705.69			3.8901	5.3438
2019-12-09_04:00:00	2019-12-09 14:00:00	0.37	36.39	27.49	1.41	0.01	0.01	311.37	-2.48	0.33	38.22	2.50186	97.5794	33.6		5.1	85.7	56.4																	37.3321	37.3321			1460.77	1460.77			6.75034	12.1512
2019-12-09_05:00:00	2019-12-09 15:00:00	0.54	47.41	36.39	1.93	0.01	0.02	310.85	-3.52	-0.91	37.7	3.63573	75.5052	28.6		4.7	82.8	61																	60.6841	60.6841			1421.29	1421.29			1.13268	17.8061
2019-12-09_06:00:00	2019-12-09 16:00:00	0.85	58.63	44.51	2.41	0.01	0.02	311.01	-2.89	-0.26	37.86	2.90167	84.8593	32		4.7	79.9	53.4																	156.5	156.5			1433.38	1433.38			3.23398	12.1499
2019-12-09_07:00:00	2019-12-09 17:00:00	1.08	55.31	39.52	2.07	0.01	0.02	310.72	-3.44	-1.79	37.57	3.87785	62.51	27.8	25.2	4.4	68.4	46.2																	137.358	137.358			153.017	330.512			0.272643	17.321
2019-12-09_08:00:00	2019-12-09 18:00:00	0.5	89.06	71.37	3.95	0.01	0.02	308.58	-3.34	-2.11	35.43	3.95066	57.718	22.1	24.1	3.7	61.3	41.8																	2427.53	2427.53			128.369	223.204			0.0628295	12.4938
2019-12-09_09:00:00	2019-12-09 19:00:00	0.98	102.14	80.63	4.55	0.02	0.03	306.54	-2.23	-1.68	33.39	2.79201	53.0071	17.1	23.3	2.8	67.2	40																	4036.06	4036.06			101.808	146.41			6.38969e-05	2.1786
2019-12-09_10:00:00	2019-12-09 20:00:01	1.46	79.69	60.23	3.48	0.01	0.03	306.35	-0.72	-3.04	33.2	3.1241	13.3246	14.1	22.5	2.6	88	36.3																	2127.98	2127.98			114.49	123.432			0.274681	2.58599
2019-12-09_11:00:00	2019-12-09 21:00:01	1.18	81.31	62.94	3.62	0.01	0.03	304.62	0.41	-1.47	31.47	1.52611	344.416	15.5	22	2.3	85.2	37																	2250.55	2250.55			89.6809	89.6809			0.598912	0.598912
2019-12-09_12:00:00	2019-12-09 22:00:01	1.55	140.21	114.1	6.46	0.02	0.03	303.18	1.28	0.04	30.03	1.28062	268.21	19.1	21.6	1.6	90	36																	9025	9025			71.0649	71.0649			0.102	1.52615
2019-12-09_13:00:00	2019-12-09 23:00:01	2.18	145.12	114.99	6.36	0.02	0.04	302.02	0.23	0.65	28.87	0.689493	199.486	16	20.9	1	113.7	35.6																	9799.02	9799.02			63.5209	63.5209			0.0964149	5.88794
2019-12-09_14:00:00	2019-12-10 00:00:01	0.58	71.37	50.32	2.12	0.01	0.03	297.75	-1.81	3.74	24.6	4.15496	154.175	13.8	20.2	0.5	133.8	34.1																	1333.71	1333.71			19.36	19.36			13.3587	13.3587
2019-12-09_15:00:00	2019-12-10 01:00:01	0.5	79.89	57.97	2.43	0.01	0.03	296.76	0.04	4.21	23.61	4.21019	180.544	14.2	19.2	0.5	228.3	30.5																	1915.81	1915.81			19.4481	19.4481			13.7655	13.7655
2019-12-09_16:00:00	2019-12-10 02:00:01	0.67	93.81	70.34	3.11	0.01	0.03	296.6	-0.07	2.07	23.45	2.07118	178.063	14.5	18.5	0.4	233.8	27.1																	3118.11	3118.11			24.5025	24.5025			2.79285	2.79285
2019-12-09_17:00:00	2019-12-10 03:00:01	0.8	100.3	75.48	3.4	0.02	0.04	296.55	0.47	0.87	23.4	0.988838	208.379	12.8	17.9	0.3	354.2	26.1																	3928.78	3928.78			30.25	30.25			0.474497	7.99285
2019-12-09_18:00:00	2019-12-10 04:00:01	0.83	97.37	71.97	3.2	0.02	0.04	296.46	-1.03	2.24	23.31	2.46546	155.306	14.5	17.4	0.4	242.9	26.4																	3302.8	3302.8			34.9281	34.9281			4.26613	4.26613
2019-12-09_19:00:00	2019-12-10 05:00:01	0.52	69.93	47.83	1.81	0.01	0.04	295.11	-2.39	1.56	21.96	2.85407	123.133	14.1	16.8	0.3	262.2	31.3																	1137.71	1137.71			26.6256	33.9889			6.52326	6.52326
2019-12-09_20:00:00	2019-12-10 06:00:01	0.48	59.41	39.4	1.37	0.01	0.03	295.03	-2.33	1.97	21.88	3.0512	130.214	17.2	17.1	0.7	267.3	54.9																	492.84	492.84			22.8484	31.4721			5.52812	5.52812
2019-12-09_21:00:00	2019-12-10 07:00:01	0.54	49.6	31.1	0.96	0.01	0.02	296.15	-1.3	2.98	23	3.25122	156.431	20.3	18.8	1.3	264.4	65.7																	116.64	238.394			17.64	17.64			3.80724	3.80724
2019-12-09_22:00:00	2019-12-10 08:00:01	0.64	36.97	18.97	0.45	0	0.01	297.85	-1.82	4.16	24.7	4.5407	156.371	27.5	20.8	1.4	257.6	77.5																	72.7609	414.937			15.21	15.21			9.86403	9.86403
2019-12-09_23:00:00	2019-12-10 09:00:01	0.55	27.39	9.97	0.13	0	0.01	298.89	-2.44	4.85	25.74	5.42919	153.293	60.3	24	1	325.7	177.5																	2533.11	2533.11			3.0276	26.5225			19.6177	19.6177
2019-12-10_00:00:00	2019-12-10 10:00:01	0.44	26.79	8.44	0.05	0	0.01	298.95	-3.3	4.61	25.8	5.6694	144.403	119.7	28.2	1.5	14.6	234																	12378.8	12378.8			5.76	88.5481			17.3839	17.3839
2019-12-10_01:00:00	2019-12-10 11:00:01	0.45	30.04	9.25	0.03	0	0.01	298.64	-3.09	4.33	25.49	5.31949	144.487	145.3	32.1	0.9	25	249.3																	18509.6	18509.6			43.6921	169			19.5319	19.5319
2019-12-10_02:00:00	2019-12-10 12:00:01	0.39	35.9	11.21	0.02	0	0.01	298.84	-4.12	4.13	25.69	5.83364	135.069	225	35.7	1.5	75.5	617.8																	45706.2	45706.2			100.2	282.24			18.7804	18.7804
2019-12-10_03:00:00	2019-12-10 13:00:01	0.33	41.46	13.38	0.02	0	0.01	297.92	-4.17	4.91	24.77	6.44182	139.659	437.1	36.3	4.3	97.6	729.6																	179539	179539			132.941	271.59			4.58738	43.9014
2019-12-10_04:00:00	2019-12-10 14:00:01	0.25	47.03	15.55	0.02	0	0.01	297.21	-4.04	5.49	24.06	6.81628	143.651	374.4	30.4	4	115.6	222.3																	128773	128773			40.1956	97.4169			7.93144	44.8938
2019-12-10_05:00:00	2019-12-10 15:00:01	0.24	43.48	14.25	0.01	0	0.01	296.62	-3.69	5.39	23.47	6.53209	145.604	193.7	27.2	4	108	126.6																	32202.3	32202.3			13.9129	36.9664			6.41148	41.1662
2019-12-10_06:00:00	2019-12-10 16:00:01	0.2	43.26	14.3	0.02	0	0.01	295.95	-3.42	5.39	22.8	6.38346	147.604	111.2	23.9	3.3	133.2	91.8																	9389.61	9389.61			1.21	4.4521			9.5077	30.9966
2019-12-10_07:00:00	2019-12-10 17:00:01	0.12	46.58	15.69	0.02	0	0.01	294.94	-2.8	5.47	21.79	6.14499	152.893	65.9	22.6	2.5	148.9	37.2																	2521.04	2521.04			0.6561	0.6561			13.286	20.5117
2019-12-10_08:00:00	2019-12-10 18:00:01	0.06	48.05	16.43	0.02	0	0.01	293.88	-2.17	5.16	20.73	5.59772	157.191	33.6	21.1	2.7	139.2	31.3																	294.809	294.809			0.1369	7.6176			8.3968	17.4868
2019-12-10_09:00:00	2019-12-10 19:00:01	0.03	48.68	16.73	0	0	0.01	292.95	-1.76	4.99	19.8	5.29129	160.572	17.3	20.1	2.3	148.6	29.2																	0.3249	1076.5			0.09	21.9961			8.94779	12.0776
2019-12-10_10:00:00	2019-12-10 20:00:01	0.01	47.9	16.54	0	0	0.01	292.35	-1.42	4.99	19.2	5.18811	164.115	14.6	19.3	2.1	157.6	23.5																	3.7636	1274.49			0.01	37.0881			9.53643	10.0623
2019-12-10_11:00:00	2019-12-10 21:00:01	0	44.94	15.57	0	0	0.01	292.01	-1.24	4.34	18.86	4.51367	164.055	4.9	18.9	1.4	173.2	22.2																	113.849	2150.18			0.0016	46.6489			9.69493	9.69493
2019-12-10_12:00:00	2019-12-10 22:00:01	0	40.99	14.38	0	0	0.01	291.68	-0.89	4.55	18.53	4.63623	168.932	0.9	18.7	1.6	177.7	20.1																	181.71	2658.43			0.0289	54.1696			9.21867	9.21867
2019-12-10_13:00:00	2019-12-10 23:00:01	0	40.42	14.36	0.01	0	0.01	291.35	-0.42	4.41	18.2	4.42995	174.56	7.6	18.1	1.7	178.9	22.6																	45.6976	2014.21			0.01	68.7241			7.45265	7.45265
2019-12-10_14:00:00	2019-12-11 00:00:01	0	42.69	15.1	0.03	0	0.01	290.99	0.24	3.97	17.84	3.97725	183.459	12.8	17.7	1.9	184.1	22.2																	5.29	1516.32			0.0196	81.9025			4.31496	4.31496
2019-12-10_15:00:00	2019-12-11 01:00:01	0	42.87	15.93	0.12	0	0.02	290.37	0.61	3.42	17.22	3.47397	190.113	9.7	17.4	2.1	188.6	19																	38.8129	1698.26			0.0324	99.4009			1.88781	2.12569
2019-12-10_16:00:00	2019-12-11 02:00:01	0.01	44.97	18.65	0.31	0.01	0.02	289.87	0.71	2.7	16.72	2.79179	194.733	8.1	17.7	2.3	207.4	19																	111.302	1607.21			0.9604	103.429			0.241859	0.952169
2019-12-10_17:00:00	2019-12-11 03:00:01	0.01	47	21.41	0.48	0.01	0.02	289.52	1.13	2.24	16.37	2.50888	206.769	8.1	17.7	2.1	217	21.2																	177.156	1393.53			1.7689	110.67			0.167186	0.242935
2019-12-10_18:00:00	2019-12-11 04:00:01	0.01	47.97	22.84	0.58	0.01	0.03	289.13	1.33	2.06	15.98	2.45204	212.847	10.3	17.4	2	239.6	21.6																	157.252	1135.69			2.0164	125.664			0.20434	0.20434
2019-12-10_19:00:00	2019-12-11 05:00:01	0.01	47.46	22.54	0.58	0.01	0.03	288.77	1.4	2.17	15.62	2.58242	212.828	9	17.3	1.9	227.7	22.1																	183.332	1246.09			2.8224	136.189			0.465699	0.465699
2019-12-10_20:00:00	2019-12-11 06:00:01	0	44.23	20.14	0.44	0.01	0.03	289.08	1.24	2.06	15.93	2.40441	211.045	12.2	17.3	1.7	236.6	25.7																	63.0436	1190.25			1.8769	129.05			0.496197	0.496197
2019-12-10_21:00:00	2019-12-11 07:00:01	0	35.3	14.66	0.17	0	0.02	290.58	0.11	2.33	17.43	2.3326	182.703	10.9	17.7	1.7	231.7	32.2																	14.1376	1704.04			0.0729	89.4916			0.400177	0.400177
2019-12-10_22:00:00	2019-12-11 08:00:01	0	25.25	10.03	0.01	0	0.01	292.05	-1.25	2.8	18.9	3.06635	155.943	13.7	18.2	1.9	220.2	35.4																	13.4689	1858.47			0.49	56.1001			1.36037	1.36037
2019-12-10_23:00:00	2019-12-11 09:00:01	0	21.27	8.53	0.01	0	0.01	292.97	-1.9	2.97	19.82	3.52575	147.392	9.8	19.2	1.3	206.7	31																	1.6129	2353.22			0.3844	31.0249			4.95395	4.95395
2019-12-11_00:00:00	2019-12-11 10:00:01	0.02	20.52	8.21	0.02	0	0.01	293.66	-2.51	2.67	20.51	3.66456	136.769	11.6	20.6	0.3	224.9	30.9																	11.4921	2211.82			0.0081	12.1104			11.3203	11.3203
2019-12-11_01:00:00	2019-12-11 11:00:01	0.02	19.54	7.76	0.02	0	0.01	294.44	-2.82	2.48	21.29	3.75537	131.329	11.3	22	1.2	134.5	27.8																	12.5316	2282.93			0.5041	1.69			6.52991	6.52991
2019-12-11_02:00:00	2019-12-11 12:00:01	0.02	19.58	7.73	0.02	0	0.01	295.15	-3.11	2.81	22	4.19144	132.099	12.5	22.8	1.9	94	34.9																	22.7529	2172.49			0.64	0.64			5.25071	5.25071
2019-12-11_03:00:00	2019-12-11 13:00:01	0.02	21.06	8.31	0.03	0	0.01	295.52	-3.52	3.05	22.37	4.65756	130.908	16.1	23.9	2.7	97.2	39.9																	60.6841	1800.3			2.3409	2.8224			3.83206	10.5077
2019-12-11_04:00:00	2019-12-11 14:00:01	0.02	22.31	8.68	0.03	0	0.01	295.57	-4.25	3.12	22.42	5.27228	126.283	19.1	23.9	4.1	93	48.3																	108.576	1525.68			2.1904	2.9929			1.37423	27.6284
2019-12-11_05:00:00	2019-12-11 15:00:01	0.02	23.13	8.91	0.03	0	0.01	295.36	-4.75	2.76	22.21	5.49364	120.159	18.5	23	4.2	116.8	36.6																	91.9681	1554.72			0.6241	0.6241			1.67351	31.1101
2019-12-11_06:00:00	2019-12-11 16:00:01	0.02	24.65	9.48	0.02	0	0.01	294.82	-4.83	1.94	21.67	5.20505	111.883	12.4	21.9	4	117	27.8																	8.5264	2021.4			0.0529	1.0404			1.45213	25.8984
2019-12-11_07:00:00	2019-12-11 17:00:01	0.01	26.58	10.27	0.01	0	0.01	294.18	-4.67	1.26	21.03	4.83699	105.099	12.9	20.5	3.6	132.9	24.8																	6.9169	1907.07			0.2809	9.3636			1.53015	18.671
2019-12-11_08:00:00	2019-12-11 18:00:01	0.01	28.56	11.2	0.01	0	0.01	293.45	-4.36	0.73	20.3	4.42069	99.5048	10.9	19.8	3.1	135.9	23																	0.09	2001.67			0.25	20.1601			1.74422	11.5919
2019-12-11_09:00:00	2019-12-11 19:00:01	0.01	30.13	11.89	0.01	0	0.01	292.7	-3.69	-0.26	19.55	3.69915	85.9697	9.9	19.4	2.5	137.5	26																	3.9601	2029.5			0.0225	31.8096			1.43796	4.33951
2019-12-11_10:00:00	2019-12-11 20:00:01	0.01	31.98	12.46	0.01	0	0.01	292.16	-2.83	-0.71	19.01	2.9177	75.9163	9.5	19.2	2.4	131	23.9																	8.7616	2014.21			0.0361	40.7044			0.268018	1.44409
2019-12-11_11:00:00	2019-12-11 21:00:01	0	32.73	12.65	0	0	0.01	291.9	-2.26	-0.52	18.75	2.31905	77.0426	11.9	18.8	1.8	138.2	22.1																	0.5625	1788.44			0.0025	49.5616			0.269414	0.269414
2019-12-11_12:00:00	2019-12-11 22:00:01	0.01	32.95	12.65	0	0	0.02	291.76	-1.82	-0.25	18.61	1.83709	82.1788	13.5	18.5	1.1	173.6	21.8																	0.7225	1655.68			0.0121	55.9504			0.543302	1.38983
2019-12-11_13:00:00	2019-12-11 23:00:01	0.01	33.43	12.69	0.01	0	0.02	291.63	-1.37	-0.18	18.48	1.38177	82.5151	15.7	18.3	1.2	176	26.7																	9.0601	1478.4			0.0324	60.9961			0.0330419	2.35385
2019-12-11_14:00:00	2019-12-12 00:00:01	0.01	34.2	12.74	0.01	0.01	0.02	291.55	-0.98	0.3	18.4	1.02489	107.02	14.2	17.8	1.1	172.7	21.3																	2.1316	1592.01			0.36	70.3921			0.00564148	3.96452
2019-12-11_15:00:00	2019-12-12 01:00:01	0.01	35.04	12.81	0	0.01	0.03	291.39	-0.69	0.94	18.24	1.16606	143.72	11.2	17.6	1	212.8	24.1																	2.5921	1834.41			0.4096	76.5625			0.0275765	3.80226
2019-12-11_16:00:00	2019-12-12 02:00:01	0	35.94	12.92	0	0.01	0.03	291.23	-0.31	0.78	18.08	0.839345	158.325	10.8	17.6	1.1	221.8	22.7																	4.4944	1859.33			0.2304	79.3881			0.067941	4.73783
2019-12-11_17:00:00	2019-12-12 03:00:01	0.01	36.99	13.03	0	0.01	0.04	291.04	-0.01	0.93	17.89	0.930054	179.384	11.8	17.7	0.9	207.3	20.9																	1.5129	1764.84			0.0361	81			0.000903229	5.22555
2019-12-11_18:00:00	2019-12-12 04:00:01	0.01	37.34	13.06	0.01	0.01	0.04	290.9	0.43	1.13	17.75	1.20905	200.833	10.1	17.7	1	208.5	19.4																	8.7616	1907.94			0.0025	83.5396			0.0437016	3.63646
2019-12-11_19:00:00	2019-12-12 05:00:01	0.01	37.18	13.05	0.01	0.01	0.04	290.81	0.85	1.1	17.66	1.39014	217.694	8.4	17.7	0.5	188.4	20.9																	21.6225	2060.25			0.0016	85.1929			0.792356	4.95444
2019-12-11_20:00:00	2019-12-12 06:00:01	0.01	36.49	13.05	0.01	0.01	0.04	290.87	1.09	1.15	17.72	1.58449	223.466	5.7	17.9	0.6	151.2	21.3																	54.0225	2312.65			0.0324	80.4609			0.969215	3.73074
2019-12-11_21:00:00	2019-12-12 07:00:01	0.02	34.28	13.25	0.02	0.01	0.03	291.61	0.85	1.25	18.46	1.51162	214.216	5.1	18.4	0.7	113.9	22.3																	66.4225	2351.28			0.0036	59.7529			0.65873	3.62666
2019-12-11_22:00:00	2019-12-12 08:00:01	0.03	32.87	13.68	0.04	0	0.02	292.58	0.02	0.72	19.43	0.720278	181.591	7.2	19	1.2	118.8	22.1																	41.9904	2112.32			0.1849	37.9456			0.230133	4.8212
2019-12-11_23:00:00	2019-12-12 09:00:01	0.05	32.72	14.15	0.07	0	0.02	293.8	-0.79	0.28	20.65	0.838153	109.516	7.8	19.8	0.9	133.4	22.1																	40.3225	2015.11			0.7225	17.1396			0.00382508	5.65416
2019-12-12_00:00:00	2019-12-12 10:00:01	0.06	32.78	14.36	0.08	0.01	0.02	295.01	-1.44	0.17	21.86	1.45	96.7328	10.7	21.2	1.4	94.9	28																	13.3956	1745.57			0.4356	2.3409			0.0025	1.60276
2019-12-12_01:00:00	2019-12-12 11:00:01	0.05	32.4	14.01	0.07	0.01	0.02	295.79	-2.45	0.51	22.64	2.50252	101.759	25	22.4	1.1	101	60.3																	120.78	774.509			0.0576	0.2025			1.96706	1.96706
2019-12-12_02:00:00	2019-12-12 12:00:01	0.03	30.35	13.19	0.05	0	0.02	296.72	-3.7	0.38	23.57	3.71946	95.8637	38.2	22.7	2.8	94.9	58.7																	625.5	625.5			0.7569	2.8224			0.845411	5.77663
2019-12-12_03:00:00	2019-12-12 13:00:01	0.03	27.81	12.31	0.05	0	0.01	297.34	-4.36	0.71	24.19	4.41743	99.2489	33.4	22.8	3.9	104.8	31.8																	444.788	446.477			1.9321	5.76			0.267735	17.652
2019-12-12_04:00:00	2019-12-12 14:00:01	0.03	27.05	12.05	0.05	0	0.01	297.35	-5.21	0.35	24.2	5.22174	93.8431	25.4	22	4.1	109.6	34.2																	178.222	863.772			4.84	4.84			1.25831	27.0998
2019-12-12_05:00:00	2019-12-12 15:00:01	0.03	26.61	11.75	0.04	0	0.01	296.68	-5.78	0.58	23.53	5.80903	95.7301	18.1	21.2	4.5	110.1	26.3																	40.3225	1368.26			5.4289	5.4289			1.71355	38.3536
2019-12-12_06:00:00	2019-12-12 16:00:01	0.03	26.09	11.64	0.05	0	0.01	296.1	-5.69	1.71	22.95	5.9414	106.727	13.6	21.2	4.2	113.4	22.4																	3.8416	1730.56			3.0625	3.0625			3.03246	36.3054
2019-12-12_07:00:00	2019-12-12 17:00:01	0.03	25.92	11.78	0.05	0	0.01	295.38	-5.17	1.55	22.23	5.39735	106.689	13.8	20.4	3.7	119	23.8																	4.0804	1702.39			3.3489	3.8416			2.881	24.8139
2019-12-12_08:00:00	2019-12-12 18:00:01	0.03	25.88	11.86	0.06	0	0.01	294.61	-4.32	1.82	21.46	4.68773	112.845	15.2	19.6	3.5	111.5	21.9																	11.1556	1582.45			3.4596	12.4609			1.4107	16.579
2019-12-12_09:00:00	2019-12-12 19:00:01	0.02	25.44	11.32	0.05	0	0.01	293.73	-3.56	1.91	20.58	4.04001	118.214	10.4	19.5	2.9	121	16.4																	0.8464	2035.81			1.1664	20.3401			1.29963	7.97505
2019-12-12_10:00:00	2019-12-12 20:00:01	0.01	24.98	10.77	0.03	0	0.01	293.15	-3.11	2.22	20	3.82106	125.52	9.9	19.2	2	128.5	17.4																	0.7569	2131.67			0.64	29.0521			3.31626	3.31626
2019-12-12_11:00:00	2019-12-12 21:00:01	0.01	25.53	10.81	0.01	0	0.01	292.73	-2.68	2.35	19.58	3.56439	131.246	13.2	18.6	1.7	143.4	19.6																	5.7121	1834.41			0.9604	41.0881			3.47596	3.47596
2019-12-12_12:00:00	2019-12-12 22:00:01	0	26.68	11.29	0.01	0	0.01	292.43	-2.38	2.14	19.28	3.20062	131.96	8.3	17.2	1.4	170.7	20.4																	8.9401	2232.56			4.3264	65.7721			3.24225	3.24225
2019-12-12_13:00:00	2019-12-12 23:00:01	0	27.58	11.65	0.01	0	0.02	292.19	-2.13	1.85	19.04	2.82124	130.976	7.9	16.7	0.8	201.8	13.5																	14.0625	2236.34			5.4756	78.3225			4.08541	4.08541
2019-12-12_14:00:00	2019-12-13 00:00:01	0	27.96	11.6	0.01	0.01	0.02	291.92	-1.8	1.47	18.77	2.32398	129.237	11.1	17	0.9	224.7	17.2																	0.25	1948.34			3.1329	77.7924			2.02773	2.02773
2019-12-12_15:00:00	2019-12-13 01:00:01	0	27.21	11.25	0.01	0.01	0.02	291.77	-1.88	1.68	18.62	2.52127	131.784	11.2	16.9	1.6	238.5	20.3																	0.0025	1970.47			2.9584	82.2649			0.848738	0.848738
2019-12-12_16:00:00	2019-12-13 02:00:01	0	24.89	10.39	0.01	0.01	0.02	291.69	-2.04	1.95	18.54	2.82207	133.708	8.9	16.9	1.4	244.4	16.4																	2.2201	2261			2.6896	83.7225			2.02229	2.02229
2019-12-12_17:00:00	2019-12-13 03:00:01	0	21.07	9.03	0.02	0	0.02	291.66	-2.25	2.27	18.51	3.19615	135.253	7.6	16.7	1.5	250.1	15.1																	2.0449	2521.04			3.2761	87.9844			2.87694	2.87694
2019-12-12_18:00:00	2019-12-13 04:00:01	0	17.42	7.86	0.04	0	0.01	291.69	-2.08	2.44	18.54	3.20624	139.554	8.5	16.6	1.6	248.4	15																	0.4096	2548.23			3.7636	89.3025			2.58002	2.58002
2019-12-12_19:00:00	2019-12-13 05:00:01	0	16.77	7.61	0.04	0	0.01	291.68	-1.93	2.46	18.53	3.12674	141.884	4.6	16.6	1.5	232.4	17.3																	9.0601	2984.44			3.7249	89.4916			2.64628	2.64628
2019-12-12_20:00:00	2019-12-13 06:00:01	0	17.46	7.63	0.03	0	0.01	291.54	-1.97	2.62	18.39	3.278	143.06	3.2	17.2	0.8	180.7	18.7																	19.6249	3137.12			1.4161	81			6.1405	6.1405
2019-12-12_21:00:00	2019-12-13 07:00:01	0	15.98	6.34	0.01	0	0.01	291.62	-2.23	2.47	18.47	3.32773	137.923	8.8	17.8	0.7	133.5	16.5																	6.0516	2672.89			0.4489	69.2224			6.90498	6.90498
2019-12-12_22:00:00	2019-12-13 08:00:01	0	14.07	4.99	0	0	0.01	292.13	-1.97	2.66	18.98	3.31006	143.476	7.6	18.1	0.3	124.2	18.3																	6.8121	2943.06			0.7744	56.4001			9.06046	9.06046
2019-12-12_23:00:00	2019-12-13 09:00:01	0	15.2	5.29	0	0	0.01	292.61	-1.97	2.57	19.46	3.23818	142.528	5.6	19.4	1.4	108.1	13.1																	0.0961	3130.4			0.0036	32.8329			3.3789	3.3789
2019-12-13_00:00:00	2019-12-13 10:00:01	0	21.6	7.61	0	0	0.01	292.95	-2.47	2.43	19.8	3.46494	134.532	6.5	20.3	1.9	73.3	20.1																	1.2321	2780.45			0.25	20.1601			2.44903	2.44903
2019-12-13_01:00:00	2019-12-13 11:00:01	0	32.49	11.45	0	0	0.01	293.2	-3.13	2.81	20.05	4.2063	131.916	8.6	21.9	1.3	92.8	25.2																	8.1225	2189.3			3.4225	6.9696			8.44661	8.44661
2019-12-13_02:00:00	2019-12-13 12:00:01	0	37.43	13.3	0	0	0.01	293.68	-3.8	2.77	20.53	4.70244	126.09	9.6	22.6	2.8	86.1	31.5																	13.69	1930.72			4.2849	4.2849			3.61926	11.4679
2019-12-13_03:00:00	2019-12-13 13:00:01	0	35.29	12.7	0	0	0.01	293.98	-4.18	2.59	20.83	4.91737	121.783	11.7	23.1	4.2	87.8	36.7																	1	1801.15			5.1529	5.1529			0.514616	25.0137
2019-12-13_04:00:00	2019-12-13 14:00:01	0	33.3	12.09	0	0	0.01	293.88	-4.7	1.94	20.73	5.08464	112.429	11	22.4	5.2	100.2	31.7																	1.1881	1914.06			2.7889	2.7889			0.0133071	38.0522
2019-12-13_05:00:00	2019-12-13 15:00:01	0	32.18	11.81	0	0	0.01	293.64	-4.75	1.61	20.49	5.01544	108.724	6.8	22.4	5.3	101.6	25.9																	25.1001	2326.13			3.6481	3.6481			0.0809766	38.433
2019-12-13_06:00:00	2019-12-13 16:00:01	0	30.48	11.36	0	0	0.01	293.51	-4.69	1.17	20.36	4.83374	104.007	3.8	21.8	4.5	110	23.8																	57.1536	2670.82			2.0736	5.9049			0.111379	27.2248
2019-12-13_07:00:00	2019-12-13 17:00:01	0	29.75	11.14	0	0	0.01	293	-4.69	0.52	19.85	4.71874	96.3266	5.8	21.4	4.1	107.1	21.4																	28.5156	2490.01			2.4025	11.1556			0.382838	22.1158
2019-12-13_08:00:00	2019-12-13 18:00:01	0	28.89	10.86	0	0	0.01	292.39	-4.31	0.58	19.24	4.34885	97.6641	8.6	20.7	3.8	110.8	22.3																	5.1076	2244.86			2.1316	21.6225			0.301237	16.2639
2019-12-13_09:00:00	2019-12-13 19:00:01	0	28.75	10.67	0	0	0.01	291.75	-3.69	1.02	18.6	3.82838	105.452	6.9	20.3	3.4	105.1	21.9																	14.2129	2427.53			2.89	32.3761			0.18351	9.68691
2019-12-13_10:00:00	2019-12-13 20:00:01	0	29.03	10.61	0.01	0	0.01	291.51	-2.98	1.41	18.36	3.29674	115.321	5.6	20.4	2.4	98.7	21.8																	25.1001	2563.4			4.1616	33.9889			0.804144	2.49874
2019-12-13_11:00:00	2019-12-13 21:00:01	0	29.43	10.65	0.01	0	0.02	291.35	-2.42	1.3	18.2	2.74707	118.244	8.6	20.4	1.6	74.7	18.5																	4.2025	2264.81			4.84	35.8801			1.31577	1.31577
2019-12-13_12:00:00	2019-12-13 22:00:01	0	29.76	10.72	0.01	0	0.02	291.3	-1.95	1.15	18.15	2.26385	120.53	2.5	20.3	0.8	95.7	19																	67.5684	2875.1			4.6225	37.6996			2.14285	2.14285
2019-12-13_13:00:00	2019-12-13 23:00:01	0	30.15	10.76	0.01	0	0.02	291.14	-1.19	0.75	17.99	1.40663	122.221	7.1	20	0.5	95.3	19																	13.3956	2399.04			4.0401	43.56			0.821973	4.88133
2019-12-13_14:00:00	2019-12-14 00:00:01	0	30.63	10.79	0.01	0.01	0.02	291.09	-0.83	0.78	17.94	1.13899	133.221	7.2	19.2	0.5	7.7	13.9																	12.8881	2386.32			1.5876	55.5025			0.408309	6.13557
2019-12-13_15:00:00	2019-12-14 01:00:01	0	31.34	10.81	0.01	0.01	0.03	291.1	-0.2	0.78	17.95	0.805233	165.619	8.6	18.6	0.3	189.9	16.9																	4.8841	2249.6			0.4225	64.6416			0.25526	9.06472
2019-12-13_16:00:00	2019-12-14 02:00:01	0	32.44	10.85	0.01	0.01	0.04	290.9	0.38	0.37	17.75	0.530377	225.764	7.1	18.2	0.3	149.7	17																	14.0625	2390.23			0.2025	74.6496			0.0530737	10.7953
2019-12-13_17:00:00	2019-12-14 03:00:01	0	33.37	10.91	0.01	0.01	0.04	290.89	0.93	0.2	17.74	0.951262	257.863	7	17.2	0.4	203.4	14.7																	15.2881	2394.14			0.2916	93.1225			0.30389	7.64377
2019-12-13_18:00:00	2019-12-14 04:00:01	0	33.93	11	0.01	0.01	0.04	290.96	1.29	-0.01	17.81	1.29004	270.444	8.9	17.3	0.2	246.2	16.4																	4.41	2203.36			0.2601	89.8704			1.18818	6.89567
2019-12-13_19:00:00	2019-12-14 05:00:01	0	33.36	10.98	0.01	0.01	0.04	291.03	1.18	-0.25	17.88	1.20619	281.962	6.1	17.6	0.3	291.8	18.8																	23.8144	2476.06			0.0784	82.9921			0.821185	6.8111
2019-12-13_20:00:00	2019-12-14 06:00:01	0	32.39	10.77	0.01	0.01	0.04	291.3	0.51	-0.92	18.15	1.0519	330.998	4.9	17.8	0.5	246.3	22.8																	34.4569	2618.37			0.1225	74.6496			0.304597	6.57459
2019-12-13_21:00:00	2019-12-14 07:00:01	0	29.17	10.26	0.01	0.01	0.03	292.54	0.66	-1.87	19.39	1.98305	340.56	10.2	19.1	0.7	245.6	25.3																	0.0036	2151.1			0.0841	37.21			1.64623	2.05334
2019-12-13_22:00:00	2019-12-14 08:00:01	0	24.73	9.55	0.02	0	0.01	294.14	0.9	-2.25	20.99	2.42332	338.199	8.3	21	0.5	355.4	30.9																	1.5625	2400.02			0.0001	6.76			3.69918	3.69918
2019-12-13_23:00:00	2019-12-14 09:00:01	0	20.31	8.81	0.07	0	0.01	295.96	1.18	-1.71	22.81	2.07762	325.392	20.4	22.9	0.5	276.9	62.7																	134.328	1416.02			0.0081	1.2544			2.48888	2.48888
2019-12-14_00:00:00	2019-12-14 10:00:01	0	15.67	7.32	0.09	0	0.01	297.68	1.23	-0.33	24.53	1.2735	285.018	49.2	24.1	1.4	329.1	117.7																	1753.93	1753.93			0.1849	16.3216			0.0160025	2.08081
2019-12-14_01:00:00	2019-12-14 11:00:01	0	11.61	5.58	0.08	0	0.01	299.28	0.87	0.37	26.13	0.94541	246.961	91.1	25.9	0.6	39.8	149.8																	7313.67	7313.67			0.0529	55.3536			0.119308	6.60793
2019-12-14_02:00:00	2019-12-14 12:00:01	0	10.14	5.14	0.1	0	0.01	300.94	0.81	-0.05	27.79	0.811542	273.532	108.3	28	0.8	58.6	133.5																	10642	10642			0.0441	125.44			0.000133212	6.27231
2019-12-14_03:00:00	2019-12-14 13:00:01	0	9.84	6.22	0.22	0	0.01	302.68	0.98	-0.8	29.53	1.26507	309.226	102.9	29.2	2.3	72	116.7																	9347.02	9347.02			0.1089	199.94			1.07108	1.07108
2019-12-14_04:00:00	2019-12-14 14:00:01	0	25.92	22.07	1.22	0	0	304.33	1.03	0.19	31.18	1.04738	259.548		28.4	4.9	91	93.8																	487.085	2004.35			7.7284	224.7			14.8427	14.8427
2019-12-14_05:00:00	2019-12-14 15:00:01	0	39.53	32.17	1.73	0.01	0.01	303.71	-2.57	0.38	30.56	2.59794	98.4107	47.9	26.3	4.5	116.1	54.3																	247.433	247.433			18.1476	150.553			3.61783	8.89198
2019-12-14_06:00:00	2019-12-14 16:00:01	0	23.26	13.34	0.4	0	0.01	300.98	-6.16	-1.41	27.83	6.31931	77.1075	30.3	24.7	4.6	128	31.5																	287.642	538.24			9.7969	63.0436			2.95603	46.285
2019-12-14_07:00:00	2019-12-14 17:00:01	0.01	21.04	9.63	0.07	0	0.01	298.58	-5.58	-0.51	25.43	5.60326	84.7779	29.2	23.6	4.1	116.9	38.4																	382.985	784.56			3.3489	19.7136			2.25978	31.2175
2019-12-14_08:00:00	2019-12-14 18:00:01	0.01	21.36	9.47	0.05	0	0.01	297.62	-4.92	1.12	24.47	5.04587	102.824	21.4	23	3	130.3	30.1																	142.325	1293.84			2.1609	8.2944			4.18558	15.4439
2019-12-14_09:00:00	2019-12-14 19:00:01	0.01	21.82	9.78	0.05	0	0.01	296.66	-3.93	1.5	23.51	4.20653	110.891	16.6	22.3	2.6	132	28.4																	46.5124	1637.01			1.4641	1.4884			2.58094	7.23896
2019-12-14_10:00:00	2019-12-14 20:00:01	0.01	23.43	10.21	0.05	0	0.02	295.74	-2.49	2.78	22.59	3.73209	138.15	14.9	21.2	2.1	144.5	26.8																	21.9961	1741.39			1.9321	1.9321			2.66372	2.94497
2019-12-14_11:00:00	2019-12-14 21:00:01	0	24.23	10.04	0.04	0	0.02	294.76	-1.49	3.78	21.61	4.06307	158.487	16.7	20.8	1.7	140.8	29.9																	44.3556	1608.01			0.6561	4.7524			5.58408	5.58408
2019-12-14_12:00:00	2019-12-14 22:00:01	0	28.88	10.83	0.03	0	0.01	293.83	-1.77	3.86	20.68	4.24647	155.366	20.3	20.3	2.1	136.9	27.3																	89.6809	1275.2			0.1444	13.0321			4.60733	4.97499
2019-12-14_13:00:00	2019-12-14 23:00:01	0	36.78	13	0.02	0	0.01	292.92	-2.23	3.49	19.77	4.14162	147.423	15.9	20.2	1.6	134.5	29.5																	8.41	1439.44			0.1849	21.3444			6.45982	6.45982
2019-12-14_14:00:00	2019-12-15 00:00:01	0	35.85	12.68	0.02	0	0.02	292.39	-2.07	3.05	19.24	3.68611	145.836	13.9	20.1	1.6	126.9	26.5																	1.4884	1620.87			0.7396	27.5625			4.35185	4.35185
2019-12-14_15:00:00	2019-12-15 01:00:01	0	33.48	11.98	0.01	0	0.02	292.2	-1.54	2.53	19.05	2.96184	148.671	14.8	20.1	1.4	119.2	22.8																	7.9524	1604.8			1.1025	29.5936			2.43935	2.43935
2019-12-14_16:00:00	2019-12-15 02:00:01	0	31.21	11.1	0.01	0.01	0.02	292.17	-1.09	1.94	19.02	2.22524	150.67	12.8	20	0.7	143.4	24																	2.89	1843.84			0.9604	31.0249			2.32636	2.32636
2019-12-14_17:00:00	2019-12-15 03:00:01	0	28.97	10.21	0.01	0.01	0.02	292.15	-0.85	1.43	19	1.66355	149.272	11.4	19.5	0.4	168.3	21.2																	1.4161	2045.75			0.25	37.0881			1.59656	4.21255
2019-12-14_18:00:00	2019-12-15 04:00:01	0	28.06	9.62	0.01	0.01	0.03	292.01	-0.8	0.96	18.86	1.24964	140.194	14.1	18.8	0.7	233	24.1																	20.0704	1859.33			0.0036	48.0249			0.302104	4.69312
2019-12-14_19:00:00	2019-12-15 05:00:01	0	28.45	9.42	0.01	0.01	0.04	291.87	-0.48	0.06	18.72	0.483735	97.1249	14.8	18.7	1.2	234.6	23.8																	28.9444	1816.46			0.0004	51.4089			0.513035	5.91591
2019-12-14_20:00:00	2019-12-15 06:00:01	0	28.71	9.68	0.02	0.01	0.04	292.08	0.24	-0.84	18.93	0.873613	344.055	16.4	19	0.9	228.8	27.1																	45.1584	1661.38			0.0049	44.3556			0.000696264	5.48678
2019-12-14_21:00:00	2019-12-15 07:00:01	0	28.16	9.97	0.04	0.01	0.03	293.01	0.54	-1.02	19.86	1.15412	332.103	12.3	20.2	0.8	220	29																	5.4289	1986.48			0.1156	20.5209			0.125403	4.67371
2019-12-14_22:00:00	2019-12-15 08:00:01	0	26.9	10.13	0.05	0.01	0.03	294.3	0.46	-0.99	21.15	1.09165	335.078	14	21.8	0.9	6.2	28.6																	14.9769	1824.14			0.4225	2.6896			0.0367298	4.51286
2019-12-14_23:00:00	2019-12-15 09:00:01	0	25.53	10.31	0.08	0.01	0.02	295.81	0.22	-0.94	22.66	0.965401	346.828	15.2	22.9	1.6	355.8	36.4																	23.9121	1708.17			0.0576	0.9409			0.402715	2.40436
2019-12-15_00:00:00	2019-12-15 10:00:01	0	23.67	10.23	0.12	0	0.02	297.69	-0.29	-0.75	24.54	0.804114	21.1399	36.2	24.8	1.8	8.4	82																	674.441	674.441			0.0676	22.5625			0.991788	2.2858
2019-12-15_01:00:00	2019-12-15 11:00:01	0	0.42	0	0	0	0	300.76	-0.8	-0.69	27.61	1.05646	49.2223	55.6	27	2.5	1.2	86.8																	3091.36	3091.36			0.3721	100.4			2.08382	2.08382
2019-12-15_02:00:00	2019-12-15 12:00:01	0	0.61	0.02	0	0	0.01	302.65	-1.08	-0.69	29.5	1.2816	57.4261	90.6	28.7	2.1	353.2	169.9																	8204.74	8204.74			0.64	185.232			0.669778	0.669778
2019-12-15_03:00:00	2019-12-15 13:00:01	0	0.91	0.24	0.01	0	0.01	304.19	-1.95	-0.57	31.04	2.0316	73.7061	114.9	30.3	1.5	9.6	152.2																	13146.9	13146.9			0.5476	280.563			0.282599	0.341523
2019-12-15_04:00:00	2019-12-15 14:00:01	0	2.39	1.34	0.08	0	0.01	304.5	-3.51	-0.72	31.35	3.58309	78.408	115.4	31.7	1.7	26	142.8																	13009.7	13009.7			0.1225	340.772			3.54601	3.54601
2019-12-15_05:00:00	2019-12-15 15:00:01	0	10.15	8.12	0.48	0	0.01	304.06	-2.69	-1.76	30.91	3.21461	56.8044		30	3.7	84.1	97.7																	65.9344	3448.04			0.8281	266.342			0.235606	7.8322
2019-12-15_06:00:00	2019-12-15 16:00:01	0	24.06	20.68	1.23	0	0.01	304.34	-2	-0.82	31.19	2.16157	67.7065	49	28.2	2.7	84.6	57.9																	802.022	802.022			8.9401	219.04			0.289903	0.55588
2019-12-15_07:00:00	2019-12-15 17:00:01	0	30.33	26.21	1.55	0.01	0.01	304.34	-1.9	-1.68	31.19	2.53622	48.5167	30.5	27.8	2.5	78.8	58.7																	18.4041	102.617			11.4921	207.36			0.00131172	0.846801
2019-12-15_08:00:00	2019-12-15 18:00:01	0	27.35	22.81	1.34	0.01	0.02	303.39	-1.9	-2.08	30.24	2.81716	42.4106	29.7	27	3	82.7	48.9																	47.4721	205.349			10.4976	160.023			0.0334298	2.89395
2019-12-15_09:00:00	2019-12-15 19:00:01	0	12	7.8	0.41	0.01	0.02	300.63	-2.68	-3.38	27.48	4.31356	38.411	26.4	26.1	2.4	64.3	38.6																	345.96	1065.37			1.9044	80.8201			3.66171	6.74732
2019-12-15_10:00:00	2019-12-15 20:00:01	0	13.73	9.63	0.51	0	0.02	298.07	-1.47	-3.58	24.92	3.87005	22.3239	18.9	25.3	1.5	65.1	40.8																	85.9329	1467.66			0.1444	31.6969			5.61714	5.61714
2019-12-15_11:00:00	2019-12-15 21:00:01	0	29.61	23.73	1.32	0.01	0.02	296.98	0.16	-3.53	23.83	3.53362	357.405	16.2	24.6	0.6	112.6	35.2																	56.7009	724.148			0.5929	14.7456			8.60615	8.60615
2019-12-15_12:00:00	2019-12-15 22:00:01	0	67.14	58.43	3.35	0.01	0.02	297.17	1.35	-2.56	24.02	2.89415	332.195	22.3	23.7	0.5	163.7	34																	1305.38	1305.38			0.1024	9.7969			5.73195	5.73195
2019-12-15_13:00:00	2019-12-15 23:00:01	0	50.96	44.28	2.55	0.01	0.02	297	2.19	-0.62	23.85	2.27607	285.807	22.5	22.9	0.3	265.2	31.1																	474.368	474.368			0.9025	4.6656			3.90486	3.90486
2019-12-15_14:00:00	2019-12-16 00:00:01	0	28.12	23.98	1.4	0.01	0.01	296.79	2.71	0.72	23.64	2.80401	255.121	24.2	23.1	1	255.2	36.8																	0.0484	348.196			0.2916	4.6225			3.25447	3.25447
2019-12-15_15:00:00	2019-12-16 01:00:01	0	23.77	19.76	1.15	0.01	0.01	295.91	2.34	1.28	22.76	2.66721	241.321	24	22.7	0.5	263.2	37.6																	17.9776	532.686			0.0036	0.7569			4.69679	4.69679
2019-12-15_16:00:00	2019-12-16 02:00:01	0	22.78	18.04	1.04	0.01	0.01	294.88	1.6	1.37	21.73	2.1064	229.428	25.7	21.6	0.7	245.6	26.2																	58.6756	533.61			0.0169	1.5876			1.97795	1.97795
2019-12-15_17:00:00	2019-12-16 03:00:01	0	20.04	14.84	0.85	0.01	0.02	294.23	1.48	1.75	21.08	2.29192	220.222	26.7	20.5	1.2	125.9	46.6																	140.66	640.09			0.3364	9.0601			1.19229	1.19229
2019-12-15_18:00:00	2019-12-16 04:00:01	0	16.16	10.57	0.57	0.01	0.02	293.67	1.64	2.03	20.52	2.60969	218.934	34.6	19.6	1.8	157.3	71.6																	577.441	577.441			0.8464	19.9809			0.655604	0.655604
2019-12-15_19:00:00	2019-12-16 05:00:01	0	12.64	6.36	0.28	0.01	0.02	292.9	1.5	2.48	19.75	2.89834	211.167	32.8	18.6	1.2	158.4	52.2																	699.074	766.182			1.3225	38.9376			2.88437	2.88437
2019-12-15_20:00:00	2019-12-16 06:00:01	0	12.83	5.07	0.11	0	0.01	292.98	0.97	3.38	19.83	3.51643	196.012	26.9	18.9	1.4	155.1	43.8																	476.549	1215.92			0.8649	34.3396			4.47929	4.47929
2019-12-15_21:00:00	2019-12-16 07:00:01	0	20.3	6.72	0.02	0	0.01	294.03	-0.19	4.27	20.88	4.27423	177.452	25.3	20.3	1.7	158.6	38.4																	345.216	1212.43			0.3364	11.6281			6.62663	6.62663
2019-12-15_22:00:00	2019-12-16 08:00:01	0	21.17	6.68	0.01	0	0.01	294.76	-1.31	4.33	21.61	4.52383	163.167	23.3	21.3	2.9	142.4	30.4																	276.224	1358.66			0.0961	2.8224			2.63681	10.9417
2019-12-15_23:00:00	2019-12-16 09:00:01	0	17.52	5.47	0	0	0.01	295.5	-2.02	4.31	22.35	4.75988	154.888	18.1	22.2	2.1	142.5	27.3																	159.517	1872.29			0.0225	0.0225			7.07499	7.5289
2019-12-16_00:00:00	2019-12-16 10:00:01	0	14.47	4.58	0	0	0.01	296.12	-2.8	4.3	22.97	5.13128	146.929	16	22.8	4	127.4	35.3																	130.416	2139.99			0.0289	1.3924			1.27979	25.153
2019-12-16_01:00:00	2019-12-16 11:00:01	0	11.86	3.71	0	0	0.01	296.34	-3.04	4.28	23.19	5.24976	144.614	21.1	23.2	3.6	124.3	42.4																	302.412	1766.52			0.0001	3.24			2.72171	22.4085
2019-12-16_02:00:00	2019-12-16 12:00:01	0	10.7	3.38	0.01	0	0.01	296.61	-3.47	4.63	23.46	5.786	143.15	21.6	22.8	3.8	130.2	37.6																	331.968	1752.26			0.4356	2.7889			3.9442	29.9209
2019-12-16_03:00:00	2019-12-16 13:00:01	0	10.42	3.36	0.02	0	0.01	296.41	-3.81	5.41	23.26	6.61696	144.845	16.1	23	4.2	123.6	27.6																	162.308	2244.86			0.0676	2.7889			5.84171	44.9029
2019-12-16_04:00:00	2019-12-16 14:00:01	0	12.45	4.06	0.01	0	0	296.03	-3.72	5.8	22.88	6.89046	147.325	15.9		4	129.6	29.7																	140.186	2197.73			523.494	523.494			8.35474	45.8933
2019-12-16_05:00:00	2019-12-16 15:00:01	0	18.45	6.11	0	0	0.01	295.6	-3.78	5.65	22.45	6.79786	146.216	41.1	22.5	3.7	132.5																		1224.3	1224.3			0.0025	0.1296			9.59674	40.7281
2019-12-16_06:00:00	2019-12-16 16:00:01	0	25.58	8.63	0	0	0.01	295.09	-3.24	5.31	21.94	6.22043	148.61	24.3	22.1	4.5	130.2																		245.549	1149.89			0.0256	0.3025			2.95987	43.6184
2019-12-16_07:00:00	2019-12-16 17:00:01	0	24.69	8.4	0	0	0.01	294.46	-2.72	5.11	21.31	5.78883	151.974	14.2	21.5	3.7	136.2	15.9																	33.64	1957.18			0.0361	3.1684			4.36319	28.8673
2019-12-16_08:00:00	2019-12-16 18:00:01	0	27.21	9.28	0	0	0.01	293.6	-2.44	4.63	20.45	5.23359	152.211	11	20.5	3.1	135.3	14.4																	2.9584	2167.83			0.0025	13.2496			4.55222	17.7881
2019-12-16_09:00:00	2019-12-16 19:00:01	0	29.15	9.76	0	0	0.01	292.8	-2.11	4.12	19.65	4.62888	152.881	6.9	19.8	2.3	141.1	17																	8.1796	2518.03			0.0225	26.4196			5.42367	7.91228
2019-12-16_10:00:00	2019-12-16 20:00:01	0	27.06	8.69	0	0	0.01	292.3	-1.81	3.79	19.15	4.20002	154.472	7.4	19.4	1.8	141.7	14																	1.6641	2575.56			0.0625	36.4816			5.76011	5.76011
2019-12-16_11:00:00	2019-12-16 21:00:01	0	26.3	8.38	0	0	0.01	291.99	-1.47	3.63	18.84	3.91635	157.954	4.1	18.9	1.1	157.1	16.8																	18.3184	2955.01			0.0036	46.9225			7.93183	7.93183
2019-12-16_12:00:00	2019-12-16 22:00:01	0	29.37	9.46	0	0	0.01	291.73	-1.01	3.14	18.58	3.29844	162.169	4.2	18.4	0.8	172.6	18.6																	27.6676	2828.11			0.0324	57.9121			6.2422	6.2422
2019-12-16_13:00:00	2019-12-16 23:00:01	0	31.16	9.96	0	0	0.01	291.45	-0.63	2.71	18.3	2.78227	166.913	6.4	17.8	0.7	183.5	16.1																	12.6736	2548.23			0.25	72.0801			4.33583	4.33583
2019-12-16_14:00:00	2019-12-17 00:00:01	0	32.25	9.96	0.01	0.01	0.02	291.12	0.27	1.95	17.97	1.9686	187.883	6.8	17.3	0.5	172.6	14.3																	9.9856	2508.01			0.4489	86.8624			2.1568	2.71392
2019-12-16_15:00:00	2019-12-17 01:00:01	0	33.75	10.27	0.05	0.01	0.03	290.54	1.29	1.48	17.39	1.96329	221.076	5	15.9	0.3	218	13.1																	27.7729	2659.46			2.2201	127.69			2.76653	3.43254
2019-12-16_16:00:00	2019-12-17 02:00:01	0	35.53	11.46	0.13	0.01	0.03	289.91	1.48	1.56	16.76	2.15035	223.493	4.8	15.3	0.4	229.6	12.1																	44.3556	2558.34			2.1316	157.001			3.06372	3.06372
2019-12-16_17:00:00	2019-12-17 03:00:01	0	37.18	13.11	0.21	0.01	0.03	289.35	1.6	1.54	16.2	2.22072	226.095	5.2	14.6	0.4	224.5	12.5																	62.5681	2355.16			2.56	190.164			3.31502	3.31502
2019-12-16_18:00:00	2019-12-17 04:00:01	0	39.03	15.18	0.32	0.01	0.02	288.89	1.73	1.23	15.74	2.12269	234.588	4.2	14.1	0.4	249.8	14.5																	120.56	2252.45			2.6896	217.562			2.96765	2.96765
2019-12-16_19:00:00	2019-12-17 05:00:01	0	41.44	18	0.49	0.01	0.02	288.55	1.79	1.06	15.4	2.08031	239.367	5.8	13.5	0.5	245.1	17.5																	148.84	1852.44			3.61	246.176			2.49739	2.49739
2019-12-16_20:00:00	2019-12-17 06:00:01	0	42.85	20.05	0.61	0.01	0.02	288.92	1.73	1.25	15.77	2.13434	234.15	8.7	14.7	0.8	250	36.4																	128.823	1450.85			1.1449	199.374			1.78046	1.78046
2019-12-16_21:00:00	2019-12-17 07:00:01	0	41.5	19.16	0.55	0.01	0.02	290.27	1.33	1.1	17.12	1.72595	230.407	13.2	17.2	1	243.7	30.8																	35.5216	1188.87			0.0064	105.473			0.527002	1.93224
2019-12-16_22:00:00	2019-12-17 08:00:01	0	36.36	14.83	0.26	0	0.02	291.83	0.29	1.07	18.68	1.1086	195.164	12	20	0.7	140.2	20.2																	8.0089	1600.8			1.7424	34.9281			0.166956	5.32408
2019-12-16_23:00:00	2019-12-17 09:00:01	0	31.37	11.73	0.12	0	0.02	293.42	-0.57	1.01	20.27	1.15974	150.561	8.7	21	0.7	62.6	17																	9.1809	2153.89			0.5329	11.0224			0.211362	5.0907
2019-12-17_00:00:00	2019-12-17 10:00:01	0	28.61	9.99	0.05	0	0.02	295.16	-1.31	1.07	22.01	1.69145	129.242	4.4	22.4	0.9	57.9	18.9																	31.2481	2751			0.1521	0.1521			0.626392	2.32426
2019-12-17_01:00:00	2019-12-17 11:00:01	0	26.95	9.2	0.01	0	0.02	296.75	-2.22	1.17	23.6	2.50944	117.79	6.1	23.8	1.8	73.3	19.4																	9.61	2656.37			0.04	7.8961			0.503308	0.503308
2019-12-17_02:00:00	2019-12-17 12:00:01	0	21.68	7.61	0.01	0	0.01	297.96	-3.24	1.32	24.81	3.49857	112.166	5.1	24.3	2.4	89.4	22.7																	6.3001	2930.06			0.2601	20.4304			1.20686	3.17756
2019-12-17_03:00:00	2019-12-17 13:00:01	0	18.69	6.68	0.01	0	0.01	298.28	-4.39	1.06	25.13	4.51616	103.575	5.3	25	3.2	95.2	24.9																	1.9044	3009.62			0.0169	30.6916			1.73228	12.9612
2019-12-17_04:00:00	2019-12-17 14:00:01	0	16.67	6	0.01	0	0.01	298.09	-4.84	0.63	24.94	4.88083	97.4161	9.2	24.9	3.8	92.3	29.2																	10.24	2666.69			0.0016	27.5625			1.16819	20.8377
2019-12-17_05:00:00	2019-12-17 15:00:01	0	15.57	5.68	0.01	0	0.01	297.99	-4.95	0.53	24.84	4.97829	96.1113	9.4	24.9	4.3	112.6	24.6																	13.8384	2679.1			0.0036	26.5225			0.460081	26.6493
2019-12-17_06:00:00	2019-12-17 16:00:01	0	15.12	5.48	0.01	0	0.01	297.5	-4.99	0.21	24.35	4.99442	92.4097	5.9	24.6	4.2	106.7	16.8																	0.1764	3075.81			0.0625	19.0096			0.631098	25.7903
2019-12-17_07:00:00	2019-12-17 17:00:01	0	14.7	5.37	0.01	0	0.01	296.77	-4.57	-0.31	23.62	4.5805	86.1195	2.9	23.9	4.2	108.1	17.3																	6.1009	3430.44			0.0784	8.5849			0.144782	21.7576
2019-12-17_08:00:00	2019-12-17 18:00:01	0	15.11	5.43	0	0	0.01	295.74	-3.99	-0.89	22.59	4.08806	77.4257	6.2	22.9	3.7	110.1	16.6																	0.5929	3048.14			0.0961	0.81			0.150587	13.484
2019-12-17_09:00:00	2019-12-17 19:00:01	0	15.56	5.48	0	0	0.01	294.48	-3.17	-1.44	21.33	3.48174	65.5698	5.8	21.9	3	92.7	18.7																	0.1024	3086.91			0.3249	1.8496			0.232072	5.59672
2019-12-17_10:00:00	2019-12-17 20:00:01	0	16.21	5.65	0	0	0.01	293.52	-2.65	-1.64	20.37	3.11642	58.2481	4.5	20.9	2.3	71.1	17.8																	1.3225	3213.76			0.2809	11.0224			0.666549	1.6911
2019-12-17_11:00:00	2019-12-17 21:00:01	0	17.91	6.11	0	0	0.01	292.91	-1.9	-1.75	19.76	2.58312	47.3534	4.7	20.2	2	55.4	19.7																	1.9881	3139.36			0.1936	21.4369			0.340027	0.340027
2019-12-17_12:00:00	2019-12-17 22:00:01	0	19.82	6.48	0	0.01	0.02	292.37	-0.87	-1.8	19.22	1.99922	25.7961	5.3	19.3	1.1	20.5	16.7																	1.3924	3031.6			0.0064	36.8449			0.808605	1.03383
2019-12-17_13:00:00	2019-12-17 23:00:01	0	20.52	6.67	0	0.01	0.03	291.8	-0.16	-1.68	18.65	1.6876	5.44041	4.2	18.2	0.3	343.8	16.1																	6.1009	3132.64			0.2025	59.9076			1.92544	4.53008
2019-12-17_14:00:00	2019-12-18 00:00:01	0	20.76	6.78	0.01	0.01	0.03	291.2	0.35	-1.76	18.05	1.79446	348.753	7	17.1	0.4	212.2	15																	0.0484	2815.36			0.9025	89.1136			1.94453	3.6923
2019-12-17_15:00:00	2019-12-18 01:00:01	0	22.67	8.23	0.08	0.01	0.03	290.27	0.78	-1.99	17.12	2.1374	338.597	6.1	16.1	0.3	112.9	14.1																	4.5369	2757.3			1.0404	129.277			3.37606	3.37606
2019-12-17_16:00:00	2019-12-18 02:00:01	0	24.57	10.73	0.22	0.01	0.02	290.06	0.82	-1.57	16.91	1.77124	332.422	6.8	15.3	0.3	223.3	15.1																	15.4449	2431.48			2.5921	153.264			2.16455	4.18103
2019-12-17_17:00:00	2019-12-18 03:00:01	0	28.33	14.23	0.41	0.01	0.02	289.91	0.55	-1.66	16.76	1.74874	341.669	9.4	14.9	0.3	216.5	17																	23.3289	1867.1			3.4596	167.185			2.09885	4.27355
2019-12-17_18:00:00	2019-12-18 04:00:01	0	30.27	15.85	0.5	0.01	0.03	289.4	0.21	-1.36	16.25	1.37612	351.222	10	14.6	0.3	235	17.2																	34.2225	1680.18			2.7225	188.788			1.15803	5.95303
2019-12-17_19:00:00	2019-12-18 05:00:01	0	30.33	15.87	0.5	0.01	0.03	289.02	0.04	-1.53	15.87	1.53052	358.502	8.6	14.4	0.3	244.8	20																	52.8529	1795.22			2.1609	205.062			1.51419	5.22341
2019-12-17_20:00:00	2019-12-18 06:00:01	0	29.5	15.13	0.46	0.01	0.04	290.18	0.42	-1.44	17.03	1.5	343.74	6.8	14.8	0.3	283.9	24.7																	69.3889	2016.91			4.9729	162.818			1.44	5.36386
2019-12-17_21:00:00	2019-12-18 07:00:01	0	23.53	12.08	0.31	0.01	0.02	292.26	0.55	-2.08	19.11	2.15149	345.189	10.9	17.2	0.4	359.7	32.3																	1.3924	1923.7			3.6481	68.5584			3.06771	3.06771
2019-12-17_22:00:00	2019-12-18 08:00:01	0	17.91	9.02	0.18	0	0.01	294.46	0.4	-2.37	21.31	2.40352	350.42	20.8	19.6	1.6	350.2	60.4																	138.768	1370.48			2.9241	13.5424			0.645642	0.645642
2019-12-17_23:00:00	2019-12-18 09:00:01	0	15.38	7.67	0.14	0	0.01	296.84	0.02	-2.29	23.69	2.29009	359.5	38.7	22	2.3	344.2	60.4																	962.861	962.861			2.8561	2.8561			9.82609e-05	0.224759
2019-12-18_00:00:00	2019-12-18 10:00:01	0	13.52	6.88	0.13	0	0.01	299.32	-0.46	-2.25	26.17	2.29654	11.5547	34.6	24.3	1.7	347.5	39.2																	768.398	768.398			3.4969	34.5744			0.355861	0.355861
2019-12-18_01:00:00	2019-12-18 11:00:01	0	13.1	6.93	0.16	0	0.01	301.54	-0.95	-2.3	28.39	2.48847	22.4428	22.6	26.9	2	20.5	25.3																	245.549	1392.04			2.2201	114.49			0.238606	0.238606
2019-12-18_02:00:00	2019-12-18 12:00:01	0	12.7	6.28	0.13	0	0.01	303.31	-1.54	-2.36	30.16	2.81801	33.1263	11.7	29	2.2	13.9	26.9																	29.3764	2387.3			1.3456	212.285			0.381941	0.813628
2019-12-18_03:00:00	2019-12-18 13:00:01	0	12.94	5.4	0.06	0	0.02	304.39	-2.81	-2.16	31.24	3.54425	52.4512	8.5	31	2.3	41.6	26.3																	9.61	2802.64			0.0576	311.523			1.54816	2.98684
2019-12-18_04:00:00	2019-12-18 14:00:01	0	14.25	5.53	0.03	0	0.02	304.34	-4.48	-2.17	31.19	4.97788	64.1557	7.5	30.8	4.5	80.6	59.9																	3.8809	2895.52			0.1521	302.76			0.22837	28.7498
2019-12-18_05:00:00	2019-12-18 15:00:01	0	15.47	5.98	0.01	0	0.01	303.17	-5.45	-2.48	30.02	5.98773	65.5324	22.8	29.1	5.3	89.4	62.1																	282.912	1448.56			0.8464	211.121			0.472971	51.4337
2019-12-18_06:00:00	2019-12-18 16:00:01	0	16.77	6.67	0.02	0	0.01	301.92	-5.28	-2.92	28.77	6.03364	61.0562	23.5	27.9	4.8	87.1	41.5																	283.249	1344.69			0.7569	145.926			1.52187	45.1267
2019-12-18_07:00:00	2019-12-18 17:00:01	0	17.05	6.98	0.04	0	0.01	301.07	-4.46	-3.48	27.92	5.65703	52.0363	18.7	27.1	4.1	74.6	37.2																	137.358	1694.15			0.6724	108.785			2.42435	31.8212
2019-12-18_08:00:00	2019-12-18 18:00:01	0	17.79	7.4	0.06	0	0.01	299.69	-3.49	-3.72	26.54	5.10083	43.173	13.9	26	3.6	80.9	30.8																	42.25	2073.89			0.2916	63.2025			2.2525	21.0207
2019-12-18_09:00:00	2019-12-18 19:00:01	0	18.48	7.08	0.02	0	0.01	297.75	-2.86	-3.54	24.6	4.55096	38.9352	12.2	24.9	2.8	79.8	28.4																	26.2144	2261.95			0.09	24.1081			3.06585	10.4649
2019-12-18_10:00:00	2019-12-18 20:00:01	0	19.48	7.08	0.01	0	0.02	296.29	-2.12	-3.06	23.14	3.72263	34.7147	10.9	23.9	2.3	81.5	27.5																	14.5924	2387.3			0.5776	6.0025			2.02389	3.63525
2019-12-18_11:00:00	2019-12-18 21:00:01	0	19.99	7.32	0.04	0.01	0.02	295.62	-1.14	-2.57	22.47	2.81149	23.9212	9.8	23.2	1.2	79.4	28.6																	6.1504	2472.08			0.5329	1.1664			2.59691	2.59691
2019-12-18_12:00:00	2019-12-18 22:00:01	0	19.61	7.83	0.11	0.01	0.03	295.1	-0.36	-2.6	21.95	2.6248	7.88322	10	22.4	0.9	61.8	27.5																	4.7089	2401.98			0.2025	0.2025			2.97495	2.97495
2019-12-18_13:00:00	2019-12-18 23:00:01	0	24.34	12.78	0.4	0.01	0.03	294.46	-0.74	-2.52	21.31	2.6264	16.365	11.6	21.4	0.6	117.7	26.9																	1.3924	1802.85			0.0081	3.5344			4.10631	4.10631
2019-12-18_14:00:00	2019-12-19 00:00:01	0	32.11	20.55	0.84	0.01	0.03	293.9	-1.07	-2.31	20.75	2.54578	24.8538	8.8	20.6	0.6	133.5	25.1																	138.062	1405.5			0.0225	10.4976			3.78606	3.78606
2019-12-18_15:00:00	2019-12-19 01:00:01	0.01	39.27	28	1.24	0.01	0.02	293.46	-1.29	-2.27	20.31	2.61094	29.6089	10.3	19.8	0.5	141.7	25.5																	313.29	814.532			0.2601	20.0704			4.45606	4.45606
2019-12-18_16:00:00	2019-12-19 02:00:01	0.01	43.66	32.96	1.52	0.01	0.02	293.09	-1.15	-2.26	19.94	2.53576	26.9693	10.3	19.1	0.4	217.4	22.6																	513.476	556.016			0.7056	30.8025			4.56149	4.56149
2019-12-18_17:00:00	2019-12-19 03:00:01	0.02	51.35	40.69	1.94	0.01	0.02	292.47	-0.57	-2.38	19.32	2.4473	13.4685	8.6	18.4	0.5	232.9	21.9																	1029.77	1029.77			0.8464	47.1969			3.792	3.792
2019-12-18_18:00:00	2019-12-19 04:00:01	0.03	64.27	53.67	2.62	0.01	0.02	292.34	-0.34	-2.66	19.19	2.68164	7.28411	9.2	17.9	0.3	278.9	24.6																	1977.58	1977.58			1.6641	56.25			5.67222	5.67222
2019-12-18_19:00:00	2019-12-19 05:00:01	0.05	70.64	60.24	2.96	0.01	0.02	292.61	0.32	-2.19	19.46	2.21326	351.687	13.2	17.5	0.5	255.3	31.6																	2212.76	2212.76			3.8416	58.2169			2.93524	2.93524
2019-12-18_20:00:00	2019-12-19 06:00:01	0.07	77	66.44	3.27	0.01	0.03	294.63	0.8	-1.8	21.48	1.96977	336.038	16.3	18.1	1	279.7	43.6																	2514.02	2514.02			11.4244	25.1001			0.940457	1.31384
2019-12-18_21:00:00	2019-12-19 07:00:01	0.07	80.12	69.57	3.42	0.01	0.03	298.97	1.03	-1.63	25.82	1.92816	327.711	17.3	20.2	1.4	275.4	52.7																	2732.15	2732.15			31.5844	31.5844			0.278953	0.620692
2019-12-18_22:00:00	2019-12-19 08:00:01	0.06	79.06	68.31	3.36	0.01	0.03	303.22	0.39	-1.43	30.07	1.48223	344.745	17.6	22.6	1.5	285.8	71.4																	2571.5	2571.5			55.8009	65.2864			0.000315842	1.28544
2019-12-18_23:00:00	2019-12-19 09:00:01	0.04	67.85	59.21	2.9	0.01	0.02	307.28	1.41	-1.28	34.13	1.90434	312.233	57	26.2	1.5	306	158.5																	4.8841	2437.4			62.8849	247.748			0.163489	0.506464
2019-12-19_00:00:00	2019-12-19 10:00:01	0.02	54.26	47.41	2.27	0.01	0.01	310.04	2.05	-0.61	36.89	2.13883	286.571	95	31.6	0.6	255.2	172.5																	2264.81	5710.82			27.9841	571.21			2.368	2.368
2019-12-19_01:00:00	2019-12-19 11:00:01	0.01	27.9	24.01	1.05	0	0.01	312.7	2.81	0.1	39.55	2.81178	267.962	104.6	35.9	0.5	4.5	150.5																	6494.75	6494.75			13.3225	952.34			5.34432	5.34432
2019-12-19_02:00:00	2019-12-19 12:00:01	0.11	27.76	23.38	1.05	0	0	314	2.95	1.14	40.85	3.16261	248.871	95.4	39.9	0.3	282.6	177.8																	5186.88	5186.88			0.9025	1307.55			8.19453	8.19453
2019-12-19_03:00:00	2019-12-19 13:00:01	0.52	34.48	27.45	1.35	0	0	314.83	3.18	2.62	41.68	4.12029	230.515	114	41.1	1.8	239.3	235.9																	7490.9	7490.9			0.3364	1458.48			5.38375	5.38375
2019-12-19_04:00:00	2019-12-19 14:00:01	0.89	47.41	37.37	1.97	0	0	315.08	3.76	2.98	41.93	4.79771	231.601	160	41.1	1.3	209.1	295.1																	15038.1	17038.1			0.6889	1477.63			12.234	12.234
2019-12-19_05:00:00	2019-12-19 15:00:01	0.99	50.12	39.54	2.11	0	0	315.08	4.37	2.65	41.93	5.11071	238.767	196	35.6	3.7	156.6	297.8																	24479.7	28459.7			40.0689	1085.04			1.99011	22.0403
2019-12-19_06:00:00	2019-12-19 16:00:01	0.81	50.47	40.57	2.19	0.01	0	314.83	4.54	1.89	41.68	4.91769	247.398	123.4	28.6	3.6	146	80.4																	6860.81	9434.24			171.086	659.976			1.73631	19.3749
2019-12-19_07:00:00	2019-12-19 17:00:01	0.35	54.59	45.06	2.39	0.01	0.01	312.98	2.18	5.08	39.83	5.528	203.226	36.9	27.6	3	152	12.2																	66.5856	228.614			149.573	521.666			6.39079	19.4658
2019-12-19_08:00:00	2019-12-19 18:00:01	0.03	36.33	25.55	0.89	0	0.01	302.32	-3.32	6.93	29.17	7.68422	154.402	10.1	26.8	2.1	160.8	10.3																	238.703	972.816			5.6169	129.504			31.1836	32.1288
2019-12-19_09:00:00	2019-12-19 19:00:01	0.02	30.34	17.88	0.46	0	0.01	299.57	-2.44	6.32	26.42	6.77466	158.89	4.3	25.4	1.1	171.5	13.1																	184.416	1994.52			1.0404	52.2729			32.2018	32.2018
2019-12-19_10:00:00	2019-12-19 20:00:01	0.07	31.76	16.55	0.33	0	0.01	297.9	-2.07	5.43	24.75	5.81118	159.132	7.6	23.6	0.9	180.3	13.3																	80.1025	1822.44			1.3225	14.1376			24.1197	24.1197
2019-12-19_11:00:00	2019-12-19 21:00:01	0.17	32.52	16.29	0.31	0	0.01	297.05	-0.55	4.66	23.9	4.69234	173.269	10.6	22.6	0.9	210.4	26.4																	32.3761	1596			1.69	3.6481			14.3819	14.3819
2019-12-19_12:00:00	2019-12-19 22:00:01	0.25	36.74	19.88	0.52	0	0.02	296.47	-0.35	4.37	23.32	4.38399	175.421	8.5	21.7	0.9	229.3	14.3																	129.504	1479.17			2.6244	2.6244			12.1382	12.1382
2019-12-19_13:00:00	2019-12-19 23:00:01	0.29	59.57	41.65	1.79	0.01	0.02	296.08	0.31	3.87	22.93	3.8824	184.58	5.2	20.6	0.5	172.3	15.2																	1328.6	1328.6			5.4289	5.4289			11.4406	11.4406
2019-12-19_14:00:00	2019-12-20 00:00:01	0.31	88.48	69.03	3.33	0.01	0.02	295.79	0.83	3.38	22.64	3.48042	193.797	7.8	19.2	0.5	119.8	17.2																	3749.11	3749.11			11.8336	11.8336			8.88288	8.88288
2019-12-19_15:00:00	2019-12-20 01:00:01	0.3	89.44	70.12	3.37	0.01	0.02	295.21	0.69	3.43	22.06	3.49871	191.374		18.3	1	129	36.3																	4916.81	4916.81			14.1376	17.8929			6.24357	6.24357
2019-12-19_16:00:00	2019-12-20 02:00:01	0.29	83.92	65.87	3.17	0.01	0.02	294.84	0.92	2.85	21.69	2.99481	197.89	8.7	17.8	0.5	128.4	36																	3268.41	3268.41			15.1321	26.01			6.22409	6.22409
2019-12-19_17:00:00	2019-12-20 03:00:01	0.26	75.11	58.08	2.76	0.01	0.03	294.46	0.58	2.64	21.31	2.70296	192.391	9.9	17.2	0.7	131.3	32.8																	2321.31	2321.31			16.8921	36.9664			4.01185	4.01185
2019-12-19_18:00:00	2019-12-20 04:00:01	0.22	63.98	47.59	2.17	0.01	0.03	293.96	0.39	2.17	20.81	2.20477	190.189	12.1	16.9	0.1	202.3	32.4																	1259.54	1259.54			15.2881	47.3344			4.43005	4.43005
2019-12-19_19:00:00	2019-12-20 05:00:01	0.19	54.76	38.73	1.66	0.01	0.03	293.5	0.12	1.66	20.35	1.66433	184.135		16	0.8	246.2	32.6																	1500.01	1500.01			18.9225	67.8976			0.747069	2.72801
2019-12-19_20:00:00	2019-12-20 06:00:01	0.16	45.83	30.58	1.19	0.01	0.03	293.59	-0.03	1.67	20.44	1.67027	178.971	11.7	16	0.6	253.9	46.3																	356.454	603.194			19.7136	66.4225			1.14548	3.40672
2019-12-19_21:00:00	2019-12-20 07:00:01	0.14	39.37	24.87	0.86	0.01	0.03	294.52	-0.63	1.37	21.37	1.50791	155.304	20.6	17.5	1.2	248.5	65.2																	18.2329	456.677			14.9769	32.7184			0.0948101	1.98271
2019-12-19_22:00:00	2019-12-20 08:00:01	0.13	35.73	21.52	0.66	0.01	0.03	296	-1.45	0.94	22.85	1.72803	122.954	22.3	20.6	0.3	147.8	57.7																	0.6084	529.92			5.0625	5.0625			2.03928	4.3596
2019-12-19_23:00:00	2019-12-20 09:00:01	0.12	30.62	17.41	0.45	0.01	0.02	297.82	-2.07	1.18	24.67	2.38271	119.685	15.5	22.6	0.9	111	34.8																	3.6481	1151.24			4.2849	7.1824			2.19842	2.19842
2019-12-20_00:00:00	2019-12-20 10:00:01	0.13	27.04	14.64	0.31	0.01	0.02	299.62	-2.36	1.17	26.47	2.6341	116.37	13.4	24.6	1.7	90.3	28.5																	1.5376	1505.44			3.4969	41.9904			0.872549	0.872549
2019-12-20_01:00:00	2019-12-20 11:00:01	0.13	25.11	13.04	0.23	0.01	0.02	301.16	-2.99	1.35	28.01	3.28064	114.299	9.1	25.8	2.5	92.7	33.9																	15.5236	1998.09			4.8841	85.0084			0.609399	2.77103
2019-12-20_02:00:00	2019-12-20 12:00:01	0.14	23.19	11.67	0.16	0	0.02	302.17	-4.07	1.42	29.02	4.3106	109.233	12.1	26.6	3.2	95	38.1																	0.1849	1855.02			5.8564	121.661			1.23344	11.5233
2019-12-20_03:00:00	2019-12-20 13:00:01	0.15	21.26	10.72	0.13	0	0.01	302.44	-4.79	0.82	29.29	4.85968	99.7142	8.8	26.8	4	97.7	32.8																	3.6864	2239.18			6.2001	132.25			0.739052	22.5025
2019-12-20_04:00:00	2019-12-20 14:00:01	0.18	20.55	10.67	0.15	0	0.01	302.37	-4.96	0.2	29.22	4.96403	92.3089	11.7	27.1	4.7	107.5	31.7																	1.0609	1977.58			4.4944	137.593			0.0697122	30.7806
2019-12-20_05:00:00	2019-12-20 15:00:01	0.18	20.35	10.49	0.14	0	0.01	302.04	-4.93	-0.48	28.89	4.95331	84.4392	11.5	27.1	4.4	79.8	25.7																	1.0201	2011.52			3.2041	129.96			0.306154	27.4294
2019-12-20_06:00:00	2019-12-20 16:00:01	0.19	20.35	10.59	0.14	0	0.01	301.43	-4.58	-1.31	28.28	4.76366	74.0382	13.2	26.1	4.7	92.9	31.2																	6.8121	1853.3			4.7524	95.8441			0.00405318	28.5975
2019-12-20_07:00:00	2019-12-20 17:00:01	0.16	20.8	10.67	0.12	0	0.01	300.31	-4.08	-1.58	27.16	4.37525	68.831	8.9	25.1	4.7	84.8	34.4																	3.1329	2234.45			4.2436	58.8289			0.105463	24.5941
2019-12-20_08:00:00	2019-12-20 18:00:01	0.14	21.57	10.77	0.1	0	0.01	298.9	-3.7	-1.86	25.75	4.14121	63.3113	11.4	23.9	4.3	82.4	35.3																	0.3969	1995.41			3.4225	25.6036			0.025215	18.7074
2019-12-20_09:00:00	2019-12-20 19:00:01	0.13	23.77	11.67	0.09	0	0.01	297.34	-3.18	-1.53	24.19	3.52892	64.3064	11.1	23.1	3.3	71	31.3																	0.3249	1942.16			1.1881	7.29			0.0524059	7.35995
2019-12-20_10:00:00	2019-12-20 20:00:01	0.12	26.4	12.76	0.09	0	0.02	296.21	-3.04	-0.97	23.06	3.191	72.3033	11.1	22.4	2.9	59.1	31.6																	2.7556	1847.28			0.4356	0.7569			0.0846827	3.90064
2019-12-20_11:00:00	2019-12-20 21:00:01	0.12	28.1	13.61	0.1	0	0.02	295.38	-2.73	-1.83	22.23	3.28661	56.165	8.6	21.8	2.6	44	32																	25.1001	1991.84			0.1849	0.3136			0.471432	3.13506
2019-12-20_12:00:00	2019-12-20 22:00:01	0.11	29.53	14.32	0.11	0.01	0.02	294.79	-1.42	-1.73	21.64	2.23815	39.3796	11.3	21.3	2	39.7	29.8																	9.1204	1699.09			0.1156	2.7225			0.0567138	0.0567138
2019-12-20_13:00:00	2019-12-20 23:00:01	0.11	31.14	15.07	0.11	0.01	0.02	294.29	-0.87	-2.01	21.14	2.19021	23.4048	11.4	20.7	1.3	25.7	29.5																	13.4689	1629.74			0.1936	7.5625			0.792466	0.792466
2019-12-20_14:00:00	2019-12-21 00:00:01	0.11	32.44	16.27	0.14	0.01	0.02	293.64	-1	-2.15	20.49	2.37118	24.944	9.9	20.4	1.7	34.4	29.6																	40.5769	1654.05			0.0081	13.69			0.450484	0.450484
2019-12-20_15:00:00	2019-12-21 01:00:01	0.11	35.27	18.01	0.19	0.01	0.03	293.33	0.27	-1.27	20.18	1.29838	347.998	10.8	20.1	1.8	29	30.9																	51.9841	1446.28			0.0064	18.5761			0.251619	1.03554
2019-12-20_16:00:00	2019-12-21 02:00:01	0.11	37.28	19.91	0.24	0.01	0.03	293.07	0.08	-1.5	19.92	1.50213	356.947	13.2	19.6	1	27.2	33.5																	45.0241	1137.71			0.1024	25.7049			0.252136	2.60457
2019-12-20_17:00:00	2019-12-21 03:00:01	0.12	40.54	23.04	0.34	0.01	0.03	292.7	-0.25	-2.24	19.55	2.25391	6.36835	14.8	18.3	0.5	228.2	31																	67.8976	841			1.5625	45.4276			3.07619	3.07619
2019-12-20_18:00:00	2019-12-21 04:00:01	0.13	42.94	26.12	0.45	0.01	0.02	292.45	0.66	-2.38	19.3	2.46982	344.501	15.6	17.6	0.3	250	29.1																	110.67	631.014			2.89	59.1361			4.70811	4.70811
2019-12-20_19:00:00	2019-12-21 05:00:01	0.14	45.07	28.13	0.53	0.01	0.02	292.54	1.14	-2.14	19.39	2.42471	331.955	16.3	17.3	0.5	235.3	30.1																	139.949	502.208			4.3681	62.41			3.70449	3.70449
2019-12-20_20:00:00	2019-12-21 06:00:01	0.15	47.26	29.72	0.61	0.01	0.03	293.22	0.54	-1.67	20.07	1.75514	342.081	18	17.6	0.7	254.1	33.5																	137.358	365.574			6.1009	47.8864			1.11331	2.75847
2019-12-20_21:00:00	2019-12-21 07:00:01	0.16	49.89	31.94	0.72	0.01	0.03	294.72	0.6	-1.24	21.57	1.37753	334.179	14.7	19.4	1.4	276.3	41.5																	297.218	408.04			4.7089	13.1044			0.00050472	1.79149
2019-12-20_22:00:00	2019-12-21 08:00:01	0.19	53.47	35.75	0.91	0.01	0.03	297.01	0.36	-3.02	23.86	3.04138	353.202	17.5	21.6	1.4	316.9	46.3																	333.062	333.062			5.1076	5.1076			2.69413	2.69413
2019-12-20_23:00:00	2019-12-21 09:00:01	0.54	56.42	37.4	1.09	0.01	0.02	300.96	-0.4	-2.09	27.81	2.12793	10.8348	19.9	24	1.4	322.4	51.8																	306.25	306.25			14.5161	52.1284			0.529887	0.529887
2019-12-21_00:00:00	2019-12-21 10:00:01	1.47	61.2	37.45	1.17	0.01	0.02	305.21	2.07	0.67	32.06	2.17573	252.065	25.6	26.8	2.4	340.8	53.5																	140.423	140.423			27.6676	203.633			0.0502971	0.211351
2019-12-21_01:00:00	2019-12-21 11:00:01	3.54	68.31	35.7	1.11	0.01	0.02	308.78	0.57	-0.67	35.63	0.879659	319.611	28.7	29.8	2.5	14	67.7																	49	49			33.9889	434.306			2.6255	2.6255
2019-12-21_02:00:00	2019-12-21 12:00:01	5.61	74.05	33.59	0.99	0.01	0.02	311.94	0.49	0.26	38.79	0.554707	242.049	45.1	32.8	1.6	11.3	98.6																	132.48	140.423			35.8801	729			1.09264	3.84667
2019-12-21_03:00:00	2019-12-21 13:00:01	4.95	74.13	34.74	1.02	0.01	0.03	312.66	-2.86	1.23	39.51	3.11328	113.271	58.3	36.7	1.4	2.5	150.5																	555.074	686.44			7.8961	999.824			2.93532	2.93532
2019-12-21_04:00:00	2019-12-21 14:00:01	5.07	77.82	36.53	1.08	0.01	0.03	312.88	-2.27	0.94	39.73	2.45693	112.494	108.3	39.1	2.1	356.4	214.3																	5150.93	6082.44			0.3969	1172.38			0.127398	0.194418
2019-12-21_05:00:00	2019-12-21 15:00:01	4.61	78.75	37.96	1.12	0.01	0.04	312.35	-3.44	-0.98	39.2	3.57687	74.0987	145.5	40.3	3	77.5	213.5																	11564.9	13600.2			1.21	1218.71			0.332779	6.05588
2019-12-21_06:00:00	2019-12-21 16:00:01	4.54	83.15	40.22	1.22	0.01	0.03	309.85	-3.62	4.87	36.7	6.06806	143.375	118.1	39.2	2.6	73.5	122.4																	6065.29	8368.59			6.25	980.316			12.0274	20.7212
2019-12-21_07:00:00	2019-12-21 17:00:01	7.6	107.81	49.88	1.7	0.01	0.03	309.81	-2.51	-0.96	36.66	2.68732	69.0698	92.6	31.6	4.3	138.1	159.9																	1825	5721.41			25.6036	560.269			2.60073	8.24449
2019-12-21_08:00:00	2019-12-21 18:00:01	7.04	100.53	42.93	1.29	0.01	0.04	308.42	-2.73	-2.21	35.27	3.51241	51.0091		24.3	3	165.1	104.4																	1842.98	1842.98			120.341	224.4			0.262561	5.74276
2019-12-21_09:00:00	2019-12-21 19:00:01	5.73	92.93	40.67	1.17	0.01	0.03	305.46	-1.86	-2.45	32.31	3.07605	37.2053	46.7	22.3	1.9	170.3	54.8																	36.3609	421.481			100.2	100.4			1.3831	1.3831
2019-12-21_10:00:00	2019-12-21 20:00:01	4.49	87.89	41.69	1.22	0.01	0.03	303.3	-0.39	-1.4	30.15	1.45331	15.5664	28.9	21.5	2.1	159.8	41.4																	163.584	163.584			74.8225	74.8225			0.418212	0.418212
2019-12-21_11:00:00	2019-12-21 21:00:01	4.47	100.66	51.17	1.71	0.01	0.04	301.8	-2.46	8.01	28.65	8.37924	162.927	20.9	21.2	2	165.8	39.4																	916.273	916.273			55.5025	55.5025			40.6947	40.6947
2019-12-21_12:00:00	2019-12-21 22:00:01	4.4	109.15	57.9	1.97	0.01	0.03	300.03	-4.52	2.87	26.88	5.35419	122.414	17.8	20.6	1.9	164.8	52.7																	1608.01	1608.01			39.4384	39.4384			11.9314	11.9314
2019-12-21_13:00:00	2019-12-21 23:00:01	7.56	122.11	53.67	1.56	0.01	0.02	299.6	-1.8	1.85	26.45	2.58118	135.785	12.7	20	1.8	167.3	43.1																	1678.54	1678.54			41.6025	41.6025			0.610245	0.610245
2019-12-21_14:00:00	2019-12-22 00:00:01	7.98	116.09	47.75	1.25	0.01	0.03	299.64	-0.42	-1	26.49	1.08462	22.7825	16.4	19.6	1.8	168.8	39.7																	982.823	982.823			47.4721	47.4721			0.511769	1.5163
2019-12-21_15:00:00	2019-12-22 01:00:01	8.07	114.02	46.64	1.21	0.01	0.03	299.89	-2.36	-1.9	26.74	3.02979	51.1631	17.5	19.5	1.7	164.4	37.3																	849.14	849.14			52.4176	52.4176			1.76833	1.76833
2019-12-21_16:00:00	2019-12-22 02:00:01	8.32	109.62	43.35	1.04	0.01	0.03	299.7	-0.37	-4.14	26.55	4.1565	5.10715	14.3	19.2	1.7	169.7	35.9																	843.903	843.903			54.0225	54.0225			6.0344	6.0344
2019-12-21_17:00:00	2019-12-22 03:00:01	7.68	124.96	60.25	1.96	0.01	0.02	298.38	0.72	-4.74	25.23	4.79437	351.363	14.8	19	1.5	167.3	36.3																	2065.7	2065.7			38.8129	38.8129			10.8529	10.8529
2019-12-21_18:00:00	2019-12-22 04:00:01	7.27	120.91	58.64	1.88	0.01	0.02	298.14	2.19	-3.22	24.99	3.89416	325.779	14.6	18.9	1.5	166.7	40.5																	1939.52	1939.52			37.0881	37.0881			5.73201	5.73201
2019-12-21_19:00:00	2019-12-22 05:00:01	0	49.96	30.97	1.25	0.01	0.02	293.41	1.1	3.27	20.26	3.45006	198.592	20.7	18.5	1.4	158.1	44																	105.473	230.129			3.0976	33.9889			4.20274	4.20274
2019-12-21_20:00:00	2019-12-22 06:00:01	0	31.15	17.5	0.64	0.01	0.02	293.41	0.84	3.65	20.26	3.74541	192.96	23.3	18.4	1.4	181.8	43.3																	33.64	678.082			3.4596	35.1649			5.50095	5.50095
2019-12-21_21:00:00	2019-12-22 07:00:01	0	25.5	13.43	0.46	0	0.01	294	0.43	3.18	20.85	3.20894	187.701	19.2	18.4	1.6	176.2	47.9																	33.2929	1170.32			6.0025	28.5156			2.58869	2.58869
2019-12-21_22:00:00	2019-12-22 08:00:01	0	21.62	10.49	0.31	0	0.01	295.07	-0.61	3.46	21.92	3.51336	170.001	19.1	18.3	1.7	185.6	43.1																	74.1321	1387.56			13.1044	19.0969			3.28828	3.28828
2019-12-21_23:00:00	2019-12-22 09:00:01	0	20.7	10.48	0.32	0	0.01	295.36	-1.45	3.26	22.21	3.56793	156.021	14	18.6	1.3	169.3	39.3																	12.3904	1794.37			13.0321	14.2884			5.14349	5.14349
2019-12-22_00:00:00	2019-12-22 10:00:01	0	20.3	10.56	0.33	0	0.01	296.21	-2.08	3.14	23.06	3.76643	146.479	14.3	19.8	1.8	154	35.4																	13.9876	1762.32			10.6276	10.6276			3.86685	3.86685
2019-12-22_01:00:00	2019-12-22 11:00:01	0	18.33	8.9	0.24	0	0.01	297.06	-2.6	2.96	23.91	3.93975	138.705	15.6	20.6	2.2	146.3	32.5																	44.89	1792.68			10.9561	10.9561			3.02672	4.09555
2019-12-22_02:00:00	2019-12-22 12:00:01	0	16.26	7.11	0.13	0	0.01	297.62	-3.3	2.89	24.47	4.38658	131.21	16.1	21.9	3.1	135.7	30.7																	80.8201	1903.58			6.6049	6.6049			1.65529	11.3608
2019-12-22_03:00:00	2019-12-22 13:00:01	0	17.54	8.11	0.16	0	0.01	298.37	-3.68	3.28	25.22	4.92958	131.711	19.3	22.7	3.4	135.2	32.1																	125.216	1554.72			6.3504	11.0889			2.33963	17.7543
2019-12-22_04:00:00	2019-12-22 14:00:01	0	17.58	7.7	0.13	0	0.01	298.57	-3.73	3.88	25.42	5.38213	136.129	19.9	22	3.4	134.4	34																	148.84	1539.78			11.6964	11.6964			3.92883	21.7727
2019-12-22_05:00:00	2019-12-22 15:00:01	0	16.81	7.08	0.1	0	0.01	298.31	-3.84	4.29	25.16	5.75758	138.168	18.1	20.9	3.2	138.8	37.1																	121.44	1735.56			18.1476	18.1476			6.5412	23.4409
2019-12-22_06:00:00	2019-12-22 16:00:01	0	14.89	6.19	0.08	0	0.01	297.88	-3.74	4.31	24.73	5.70646	139.05	19.7	19.9	2	158.7	40.7																	182.52	1676.9			23.3289	23.3289			13.7379	13.7379
2019-12-22_07:00:00	2019-12-22 17:00:01	0	13.92	5.28	0.04	0	0.01	297.01	-3.34	4.15	23.86	5.32711	141.172	14.4	19.6	1.9	163.8	40																	83.1744	2224.07			18.1476	18.1476			11.7451	11.7451
2019-12-22_08:00:00	2019-12-22 18:00:01	0	13.72	4.9	0.02	0	0.01	296.03	-2.87	3.98	22.88	4.90686	144.204	19.3	19.6	2	141.6	38.3																	207.36	1818.17			10.7584	10.7584			8.44985	8.44985
2019-12-22_09:00:00	2019-12-22 19:00:01	0	14.99	5.24	0.01	0	0.01	295.04	-2.21	3.77	21.89	4.37001	149.621	19.5	18.7	1.6	155	38.5																	203.348	1772.41			10.1761	16			7.67296	7.67296
2019-12-22_10:00:00	2019-12-22 20:00:01	0	18.22	6.53	0	0	0.01	294.36	-1.57	3.33	21.21	3.68155	154.757	20	17.8	1.1	175.4	41																	181.441	1624.9			11.6281	31.1364			6.66439	6.66439
2019-12-22_11:00:00	2019-12-22 21:00:01	0	21.1	7.56	0	0	0.01	293.99	-1.13	3.14	20.84	3.33714	160.207	14	17.7	1.2	187.3	39.9																	41.4736	2050.28			9.8596	36.6025			4.56737	4.56737
2019-12-22_12:00:00	2019-12-22 22:00:01	0	21.09	7.48	0	0	0.02	293.66	-0.98	3.1	20.51	3.25122	162.457	17.2	17.6	1.2	188.1	38																	94.4784	1777.47			8.4681	41.9904			4.20748	4.20748
2019-12-22_13:00:00	2019-12-22 23:00:01	0	20.44	7.13	0	0	0.02	293.29	-0.29	2.61	20.14	2.62606	173.66	18.3	17.4	1.1	197.5	36.6																	124.769	1714.79			7.5076	49.7025			2.32886	2.32886
2019-12-22_14:00:00	2019-12-23 00:00:01	0	23.28	7.43	0	0.01	0.03	292.78	0.59	2.05	19.63	2.13321	196.056	19.3	17.4	1.2	202.7	37.5																	140.897	1608.81			4.9729	57.1536			0.870888	0.870888
2019-12-22_15:00:00	2019-12-23 01:00:01	0	24.87	7.61	0	0.01	0.03	292.1	1.4	1.88	18.95	2.34401	216.674	19.7	17.2	0.7	209.4	38.2																	146.168	1562.62			3.0625	71.2336			2.70278	2.70278
2019-12-22_16:00:00	2019-12-23 02:00:01	0	25.23	7.59	0	0.01	0.03	291.42	1.58	1.98	18.27	2.53314	218.589	20.1	17.1	0.7	195.8	36.2																	156.5	1532.72			1.3689	85.0084			3.3604	3.3604
2019-12-22_17:00:00	2019-12-23 03:00:01	0	25.04	7.45	0	0.01	0.03	290.95	1.71	1.58	17.8	2.3282	227.263	16.2	16.6	1.1	223.9	36.4																	76.5625	1865.38			1.44	103.836			1.50847	1.50847
2019-12-22_18:00:00	2019-12-23 04:00:01	0	24.08	7.15	0.01	0.01	0.03	290.59	1.96	1.36	17.44	2.38562	235.244	18.7	16.2	1.3	236.5	36.9																	133.402	1680.18			1.5376	119.903			1.17858	1.17858
2019-12-22_19:00:00	2019-12-23 05:00:01	0	22.72	6.78	0.01	0.01	0.03	290.27	1.95	1.51	17.12	2.46629	232.247	21.9	16.2	1.2	228.8	37.3																	228.614	1456.19			0.8464	127.013			1.6035	1.6035
2019-12-22_20:00:00	2019-12-23 06:00:01	0	21.13	6.46	0.01	0.01	0.02	290.55	2.11	1.23	17.4	2.44233	239.76	22.4	16.3	1	242.9	36.9																	254.084	1442.48			1.21	118.592			2.08033	2.08033
2019-12-22_21:00:00	2019-12-23 07:00:01	0	19.79	6.37	0.01	0	0.02	291.78	1.56	1.01	18.63	1.85841	237.08	20.3	16.8	1.3	240.5	39.9																	194.045	1613.63			3.3489	83.9056			0.311825	0.916972
2019-12-22_22:00:00	2019-12-23 08:00:01	0	20.19	6.78	0.01	0	0.02	293.46	0.27	1.19	20.31	1.22025	192.783	19.1	18.3	0.9	217.9	42.2																	151.782	1677.72			4.0401	35.7604			0.102557	3.98303
2019-12-22_23:00:00	2019-12-23 09:00:01	0	20.61	7.43	0.04	0.01	0.02	295.14	-0.57	0.64	21.99	0.85703	138.311	18.9	19.7	0.2	33	43.1																	131.561	1641.06			5.2441	8.41			0.431688	9.3573
2019-12-23_00:00:00	2019-12-23 10:00:01	0	21.39	8.16	0.06	0.01	0.02	297.02	-1.56	0.61	23.87	1.67502	111.357	16.4	21.1	1.1	79.7	46.8																	67.8976	1787.6			7.6729	7.6729			0.330651	1.79822
2019-12-23_01:00:00	2019-12-23 11:00:01	0	22.76	9.26	0.09	0.01	0.02	298.95	-2.32	0.67	25.8	2.41481	106.108	15.4	22	2.3	66.3																		37.6996	1779.15			14.44	14.44			0.013181	0.358572
2019-12-23_02:00:00	2019-12-23 12:00:01	0	24.2	10.89	0.13	0	0.02	300.38	-3.51	0.46	27.23	3.54001	97.4662	13.7	23.1	2.4	39.4																		7.8961	1785.06			17.0569	32.9476			1.29963	3.32703
2019-12-23_03:00:00	2019-12-23 13:00:01	0	24.61	11.61	0.14	0	0.01	300.91	-4.61	0.13	27.76	4.61183	91.6151	13	23.4	2.7	32.7	77.6																	1.9321	1783.37			19.0096	43.1649			3.6551	10.2133
2019-12-23_04:00:00	2019-12-23 14:00:01	0	23.45	11.9	0.18	0	0.01	300.62	-5.38	-0.02	27.47	5.38004	89.7872	13.7	23.9	3.1	35	48.5																	3.24	1700.74			12.7449	45.9684			5.19857	19.0448
2019-12-23_05:00:00	2019-12-23 15:00:01	0	23.03	12.26	0.21	0	0.01	300.13	-5.68	-0.23	26.98	5.68465	87.6813	11.2	24.4	3.5	42.8	38.8																	1.1236	1881.82			6.6564	46.1041			4.77272	25.6913
2019-12-23_06:00:00	2019-12-23 16:00:01	0	22.77	12.23	0.2	0	0.01	299.27	-5.39	-0.83	26.12	5.45353	81.246	14.8	24.7	3.9	72.6	35.9																	6.6049	1584.84			2.0164	38.8129			2.41346	27.4317
2019-12-23_07:00:00	2019-12-23 17:00:01	0	22.33	12.09	0.19	0	0.01	298.35	-4.95	-1.34	25.2	5.12817	74.8528	10.7	24.6	4	69	33.1																	1.9321	1940.4			0.36	27.1441			1.27276	25.1218
2019-12-23_08:00:00	2019-12-23 18:00:01	0	22.73	11.85	0.16	0	0.01	297.33	-3.99	-1.65	24.18	4.31771	67.5334	12.2	23.8	4.1	66.8	33.4																	0.1225	1830.98			0.1444	11.4921			0.0473967	18.5047
2019-12-23_09:00:00	2019-12-23 19:00:01	0	23.12	11.34	0.13	0	0.01	296.58	-3.03	-1.12	23.43	3.23037	69.714	11.4	22.6	3.7	72.9	29.9																	0.0036	1944.81			0.6889	2.0736			0.220551	7.92069
2019-12-23_10:00:00	2019-12-23 20:00:01	0	24.55	11.33	0.12	0	0.01	296.36	-2.88	-0.52	23.21	2.92657	79.7653	9.4	21.6	3	66.6	27.9																	3.7249	2126.13			2.5921	2.5921			0.00539227	3.27816
2019-12-23_11:00:00	2019-12-23 21:00:01	0	26.57	11.43	0.1	0	0.02	296.08	-2.9	-0.52	22.93	2.94625	79.8344	12.8	21.2	2.2	59.9	24.8																	1.8769	1815.61			2.9929	2.9929			0.556892	1.06142
2019-12-23_12:00:00	2019-12-23 22:00:01	0	28.18	11.4	0.08	0	0.02	295.96	-2.34	-0.42	22.81	2.37739	79.8246	12.9	20.9	2	41.6	21.3																	2.25	1809.65			3.6481	3.6481			0.142426	0.142426
2019-12-23_13:00:00	2019-12-23 23:00:01	0	29.48	11.24	0.06	0.01	0.02	295.89	-2.15	-0.4	22.74	2.18689	79.461	11.4	20.5	1.7	34.9	19.2																	0.0256	1953.64			5.0176	5.0176			0.237065	0.237065
2019-12-23_14:00:00	2019-12-24 00:00:01	0	31.1	11.25	0.06	0.01	0.03	295.79	-0.19	0.7	22.64	0.725328	164.814	8.1	20.5	1.1	349.9	16.4																	9.9225	2255.3			4.5796	4.5796			0.140379	5.24718
2019-12-23_15:00:00	2019-12-24 01:00:01	0	33.03	11.23	0.05	0.01	0.04	295.82	-2.15	0.57	22.67	2.22428	104.848	5.3	20.7	0.5	309	14																	35.1649	2531.1			3.8809	3.8809			2.97312	2.97312
2019-12-23_16:00:00	2019-12-24 02:00:01	0	34.8	11.22	0.05	0.01	0.05	295.8	-1.33	-0.12	22.65	1.3354	84.8446	8.4	20.6	0.3	141.6	15.3																	7.9524	2229.73			4.2025	4.2025			1.07206	6.15336
2019-12-23_17:00:00	2019-12-24 03:00:01	0	34.07	10.98	0.04	0.01	0.05	295.58	-2.07	-0.28	22.43	2.08885	82.2967	10.2	20.5	0.7	142	17.6																	0.6084	2084.84			3.7249	3.7249			1.92891	1.92891
2019-12-23_18:00:00	2019-12-24 04:00:01	0	33.79	11.03	0.03	0.01	0.05	295.26	-1.24	0.06	22.11	1.24145	92.7701	10.1	19.7	0.4	143.3	17.3																	0.8649	2089.4			5.8081	7.7284			0.708039	6.12339
2019-12-23_19:00:00	2019-12-24 05:00:01	0	18.29	5.84	0	0.01	0.06	293.58	-0.26	0.87	20.43	0.90802	163.361	9.7	20.1	0.5	118.8	18.1																	14.8996	2631.69			0.1089	16.4836			0.16648	7.33316
2019-12-23_20:00:00	2019-12-24 06:00:01	0	19.16	6.17	0	0.02	0.07	293.89	-0.73	0.6	20.74	0.944934	129.417	8.1	20.5	0.4	159.5	21.3																	3.7249	2763.6			0.0576	11.2225			0.296953	7.67881
2019-12-23_21:00:00	2019-12-24 07:00:01	0	19.62	6.45	0	0.01	0.05	294.73	-1.61	-0.42	21.58	1.66388	75.3793	9.4	21.5	0.4	155.5	28.6																	8.7025	2599.98			0.0064	2.2801			1.5974	4.21119
2019-12-23_22:00:00	2019-12-24 08:00:01	0	19.81	6.7	0	0	0.02	295.87	-2.55	-0.32	22.72	2.57	82.8475	8.9	21.3	0.7	286.5	25.6																	4.84	2625.54			2.0164	2.0164			3.4969	3.4969
2019-12-23_23:00:00	2019-12-24 09:00:01	0	17.98	6.34	0	0	0.01	296.62	-2.9	-0.24	23.47	2.90991	85.2692	9.5	22.7	0.6	268.8	22.3																	9.9856	2601			0.5929	2.4964			5.3357	5.3357
2019-12-24_00:00:00	2019-12-24 10:00:01	0	13.17	4.9	0	0	0.01	297.59	-3.45	-0.04	24.44	3.45023	89.3359	9.1	23.6	0.3	27	24.3																	17.64	2792.07			0.7056	11.9025			9.92396	9.92396
2019-12-24_01:00:00	2019-12-24 11:00:01	0	9.68	3.82	0.02	0	0.01	298.46	-4.6	0.91	25.31	4.68915	101.19	9.3	24.1	1.8	38	22.4																	30.0304	2885.84			1.4641	23.2324			8.34717	8.34717
2019-12-24_02:00:00	2019-12-24 12:00:01	0	8.97	4.26	0.07	0	0.01	299.76	-4.85	1.25	26.61	5.00849	104.452	8.5	25.9	2.7	100.6	22.7																	17.9776	2924.65			0.5041	62.7264			5.32914	12.906
2019-12-24_03:00:00	2019-12-24 13:00:01	0	12.25	5.89	0.11	0	0.01	300.16	-5.2	1.67	27.01	5.46158	107.804	12.3	25.9	4.1	119.6	25.3																	41.0881	2366.82			1.2321	69.2224			1.85391	29.6544
2019-12-24_04:00:00	2019-12-24 14:00:01	0	15.97	6.83	0.09	0	0.01	300.14	-5.39	1.92	26.99	5.72176	109.607	15.3	26.4	4.4	122.6	35																	71.7409	1998.98			0.3481	77.44			1.74704	36.0691
2019-12-24_05:00:00	2019-12-24 15:00:01	0	19.07	7.32	0.05	0	0.01	299.81	-5.39	1.92	26.66	5.72176	109.607	22.8	26.1	4.1	123.2	37																	239.63	1348.36			0.3136	66.7489			2.63009	32.5557
2019-12-24_06:00:00	2019-12-24 16:00:01	0	22.92	8.07	0.02	0	0.01	299.29	-5.5	1.37	26.14	5.66806	103.987	31.6	25.2	3.9	132.6	36.2																	553.661	738.209			0.8836	45.5625			3.12603	29.725
2019-12-24_07:00:00	2019-12-24 17:00:01	0	27.45	9.35	0.01	0	0.01	298.51	-5.17	0.55	25.36	5.19917	96.0723	27.9	23.8	2.9	139.2	36.7																	344.102	875.568			2.4336	20.8849			5.2862	15.8657
2019-12-24_08:00:00	2019-12-24 18:00:01	0	31.24	10.5	0	0	0.01	297.58	-4.81	0.18	24.43	4.81337	92.143	23.5	23.2	2.3	146.5	33																	169	1078.47			1.5129	9.2416			6.31701	8.98421
2019-12-24_09:00:00	2019-12-24 19:00:01	0	35	11.6	0	0	0.01	296.52	-4.26	0.4	23.37	4.27874	95.364	19.7	22.5	1.8	149.4	34.6																	65.61	1263.09			0.7569	1.6384			6.14414	6.14414
2019-12-24_10:00:00	2019-12-24 20:00:01	0	39.21	12.71	0	0	0.01	295.75	-3.7	0.84	22.6	3.79415	102.791	14.9	22	1.4	146.7	29.5																	4.7961	1538.99			0.36	0.36			5.73197	5.73197
2019-12-24_11:00:00	2019-12-24 21:00:01	0	41.53	13.24	0	0	0.02	295.14	-3.39	1.17	21.99	3.58622	109.041	14.7	20.9	1.3	146.5	26.6																	2.1316	1513.21			1.1881	2.89			5.22682	5.22682
2019-12-24_12:00:00	2019-12-24 22:00:01	0	41.9	13.31	0	0	0.02	294.98	-3.24	1.28	21.83	3.48368	111.557	9.1	20.9	1.4	136.3	26.8																	17.7241	1974.02			0.8649	3.4596			4.34171	4.34171
2019-12-24_13:00:00	2019-12-24 23:00:01	0	42.04	13.37	0	0	0.02	294.83	-3.27	1.1	21.68	3.45006	108.592	10.5	20.9	1.3	129.9	26.4																	8.2369	1846.42			0.6084	4.0401			4.62275	4.62275
2019-12-24_14:00:00	2019-12-25 00:00:01	0	44.24	13.92	0	0	0.02	294.66	-2.75	1.19	21.51	2.99643	113.399	11.8	20.7	0.9	137.2	27.7																	4.4944	1690.85			0.6561	5.6644			4.39502	4.39502
2019-12-24_15:00:00	2019-12-25 01:00:01	0	46.16	14.43	0	0.01	0.03	294.43	-2.29	1.18	21.28	2.57614	117.261	16.5	20.5	0.5	154.4	31.7																	4.2849	1289.53			0.6084	7.8961			4.31036	4.31036
2019-12-24_16:00:00	2019-12-25 02:00:01	0	46.47	14.47	0	0.01	0.04	293.96	-1.9	1.26	20.81	2.27982	123.551	19	20.4	0.5	158.7	32.8																	20.5209	1113.56			0.1681	11.4244			3.16778	3.16778
2019-12-24_17:00:00	2019-12-25 03:00:01	0	45.37	14.16	0	0.01	0.04	294.08	-1.82	1.31	20.93	2.24243	125.745	22.7	20.1	0.9	132.7	36.4																	72.9316	898.8			0.6889	12.6736			1.80212	1.80212
2019-12-24_18:00:00	2019-12-25 04:00:01	0	43.15	13.42	0	0.01	0.04	294.16	-2.08	1.38	21.01	2.49616	123.563	24.5	19.7	0.8	125.4	32.7																	122.766	836.366			1.7161	15.0544			2.87695	2.87695
2019-12-24_19:00:00	2019-12-25 05:00:01	0	40.45	12.52	0	0.01	0.03	294.2	-2.22	1.25	21.05	2.54772	119.382	23.2	19.6	1.4	120.3	29.3																	114.062	968.454			2.1025	15.5236			1.31727	1.31727
2019-12-24_20:00:00	2019-12-25 06:00:01	0	39.27	12.22	0	0.01	0.02	294.51	-2.52	0.94	21.36	2.68961	110.456	22.4	19.7	1.5	123.9	27.9																	103.632	1038.13			2.7556	12.4609			1.41517	1.41517
2019-12-24_21:00:00	2019-12-25 07:00:01	0	37.89	11.92	0	0	0.02	295.18	-2.68	0.88	22.03	2.82078	108.178	20	20.7	1.6	129.4	33																	65.2864	1219.41			1.7689	3.4596			1.4903	1.4903
2019-12-24_22:00:00	2019-12-25 08:00:01	0	36.04	11.43	0	0	0.01	296.03	-3.33	0.45	22.88	3.36027	97.6959	19.9	22.2	2.3	100.3	35.3																	71.7409	1260.96			0.4624	0.4624			1.12417	2.38476
2019-12-24_23:00:00	2019-12-25 09:00:01	0	32.55	10.46	0	0	0.01	296.84	-3.71	-0.21	23.69	3.71594	86.7604	20.9	23.1	2.6	102.8	32.1																	108.994	1258.83			0.3481	4.84			1.24532	4.83973
2019-12-25_00:00:00	2019-12-25 10:00:01	0	28.01	8.99	0	0	0.01	297.52	-4.21	-0.02	24.37	4.21005	89.728	18	24.5	3.5	74.1	29.1																	81.1801	1588.02			0.0169	18.3184			0.504167	12.9172
2019-12-25_01:00:00	2019-12-25 11:00:01	0	25.82	8.19	0	0	0.01	297.82	-5	-0.39	24.67	5.01519	85.5401	17.7	25.3	3.8	76.9	22.8																	90.4401	1676.9			0.3969	28.9444			1.47668	22.0824
2019-12-25_02:00:00	2019-12-25 12:00:01	0	24.34	7.82	0	0	0	298.43	-5.2	-1.09	25.28	5.31301	78.1615	15.4	26.3	4	76	20																	57.4564	1902.7			1.0404	48.8601			1.724	27.0089
2019-12-25_03:00:00	2019-12-25 13:00:01	0	22.79	7.42	0	0	0	298.74	-5.45	-1.5	25.59	5.65265	74.6117	14.5	27.5	4.7	89.3	22.7																	50.1264	2017.81			3.6481	72.25			0.90755	38.8959
2019-12-25_04:00:00	2019-12-25 14:00:01	0	20.23	6.64	0	0	0	298.71	-5.62	-1.58	25.56	5.83788	74.2974	17.3	27.5	4.9	81.1	24.9																	113.636	1840.41			3.7636	71.7409			0.879612	43.8492
2019-12-25_05:00:00	2019-12-25 15:00:01	0	17.89	5.94	0	0	0	298.61	-5.5	-1.61	25.46	5.7308	73.6839	17.2	27.4	5.3	87.9	24.1																	126.788	1909.69			3.7636	68.3929			0.185591	47.8145
2019-12-25_06:00:00	2019-12-25 16:00:01	0	16.74	5.63	0	0	0	298.28	-5.35	-1.81	25.13	5.64788	71.3085	14.9	27	4.9	77.2	21.7																	85.9329	2144.62			3.4969	56.8516			0.559331	41.3691
2019-12-25_07:00:00	2019-12-25 17:00:01	0	16.31	5.58	0	0	0	297.76	-5.08	-2.1	24.61	5.49694	67.5406	14	26.2	4.8	79.8	21.8																	70.8964	2233.51			2.5281	38.6884			0.485732	38.2041
2019-12-25_08:00:00	2019-12-25 18:00:01	0	17.42	5.97	0	0	0.01	296.85	-4.63	-2.13	23.7	5.09645	65.2957	14.2	25.1	4.1	65.9	22.9																	67.7329	2178.09			1.96	17.7241			0.992912	25.811
2019-12-25_09:00:00	2019-12-25 19:00:01	0	18.65	6.38	0	0	0.01	295.73	-4.03	-2.25	22.58	4.61556	60.825	12.5	24.2	3.4	68.1	23.5																	37.4544	2300.16			2.6244	4.7961			1.47759	15.2066
2019-12-25_10:00:00	2019-12-25 20:00:01	0	18.98	6.48	0	0	0.01	294.93	-3.36	-2.3	21.78	4.07181	55.6076	12.1	23.3	3.4	54.3	23.3																	31.5844	2329.03			2.3104	2.3104			0.451323	11.2614
2019-12-25_11:00:00	2019-12-25 21:00:01	0	19.17	6.56	0	0	0.01	294.52	-2.58	-2.05	21.37	3.29528	51.5304	12.3	22.4	2.9	43	22.1																	32.9476	2302.08			1.0609	1.0609			0.15625	4.32342
2019-12-25_12:00:00	2019-12-25 22:00:01	0	19.59	6.73	0	0	0.02	294.22	-2.04	-1.81	21.07	2.72721	48.4189	12	22.3	1.9	60.6	20.5																	27.7729	2314.57			1.5129	1.5129			0.684284	0.684284
2019-12-25_13:00:00	2019-12-25 23:00:01	0	19.19	6.65	0	0.01	0.02	293.95	-1.57	-1.66	20.8	2.28484	43.404	10.3	21.9	1.4	67.1	20.7																	13.3225	2489.01			1.21	3.5721			0.782944	0.782944
2019-12-25_14:00:00	2019-12-26 00:00:01	0	18.35	6.43	0	0.01	0.02	293.7	-1.23	-1.45	20.55	1.90142	40.3072	11.1	20.9	0.6	65.6	19.8																	21.8089	2431.48			0.1225	9.8596			1.6937	2.60687
2019-12-25_15:00:00	2019-12-26 01:00:01	0	17.9	6.31	0	0.01	0.02	293.36	-1.05	-1.56	20.21	1.88045	33.9437	11.4	20.7	0.9	125.4	20.7																	25.9081	2413.76			0.2401	13.5424			0.961286	1.78369
2019-12-25_16:00:00	2019-12-26 02:00:01	0	17.64	6.26	0	0.01	0.03	292.94	-0.72	-1.7	19.79	1.84619	22.9542	10	19.6	0.7	130.5	18.8																	13.9876	2558.34			0.0361	27.04			1.31374	2.46432
2019-12-25_17:00:00	2019-12-26 03:00:01	0	17.21	6.18	0	0.01	0.03	292.28	-0.3	-1.55	19.13	1.57877	10.9541	11.4	18.8	0.4	125.6	19.3																	27.2484	2426.55			0.1089	44.3556			1.38949	4.56777
2019-12-25_18:00:00	2019-12-26 04:00:01	0	16.68	6.08	0	0.01	0.03	291.76	0.16	-1.57	18.61	1.57813	354.181	11.1	18.7	0.4	141.1	20.1																	25.2004	2466.12			0.0081	52.9984			1.38799	4.57048
2019-12-25_19:00:00	2019-12-26 05:00:01	0	16.45	6.12	0.01	0.01	0.03	291.21	0.76	-1.76	18.06	1.91708	336.644	17.2	19.1	0.5	122.6	22.4																	122.766	1893.99			1.0816	55.2049			2.00812	2.88633
2019-12-25_20:00:00	2019-12-26 06:00:01	0	16.44	6.36	0.03	0.01	0.03	291.2	1.16	-1.57	18.05	1.95205	323.541	16.5	20.1	0	134.3	25.2																	102.82	1934.24			4.2025	41.4736			3.8105	4.68268
2019-12-25_21:00:00	2019-12-26 07:00:01	0	15.81	6.11	0.02	0.01	0.03	291.95	1.01	-1.38	18.8	1.71012	323.8	13.4	21.7	1.6	33.9	23.9																	53.1441	2240.13			8.41	16.7281			0.0121257	0.649447
2019-12-25_22:00:00	2019-12-26 08:00:01	0	14.93	5.67	0.01	0.01	0.02	294.05	0.38	-1.61	20.9	1.65424	346.72	14.8	22.9	2.3	13.3	20.6																	83.3569	2150.18			4	4			0.41701	0.41701
2019-12-25_23:00:00	2019-12-26 09:00:01	0	13.8	5.31	0.01	0	0.02	296.08	-0.03	-1.35	22.93	1.35033	1.27311	10.8	24.1	2.3	8.5	20.8																	30.1401	2573.53			1.3689	5.9536			0.901867	0.901867
2019-12-26_00:00:00	2019-12-26 10:00:01	0	13.16	5.08	0.01	0	0.02	297.86	-1.12	-0.97	24.71	1.48165	49.1052	10.9	25.8	2.1	353.3	22.8																	33.8724	2586.74			1.1881	35.0464			0.382351	0.382351
2019-12-26_01:00:00	2019-12-26 11:00:01	0	12.57	4.84	0.01	0	0.01	299.46	-2.55	-1.07	26.31	2.76539	67.2368	12.4	27.9	2.3	18.8	21.7																	57.1536	2460.16			2.5281	92.5444			0.216591	0.901348
2019-12-26_02:00:00	2019-12-26 12:00:01	0	11.23	4.46	0.01	0	0.01	300.5	-4.19	-1.65	27.35	4.50318	68.5059	14	29.5	2.9	56.4	20.5																	91.0116	2340.62			4.6225	150.308			2.57018	10.8055
2019-12-26_03:00:00	2019-12-26 13:00:01	0	10.06	4.19	0.02	0	0	300.56	-5.17	-1.89	27.41	5.50463	69.9192	8.1	30.1	4.7	90.5	23.5																	15.2881	2975.7			7.2361	166.926			0.647437	37.0715
2019-12-26_04:00:00	2019-12-26 14:00:01	0	9.66	4.21	0.03	0	0	300.38	-5.51	-1.99	27.23	5.85834	70.1424	7.9	30	5.6	89	17.5																	13.6161	2995.37			7.6729	159.77			0.0667419	53.91
2019-12-26_05:00:00	2019-12-26 15:00:01	0	9.48	4.14	0.03	0	0	300.07	-5.7	-2.38	26.92	6.17692	67.3375	9.8	29.4	5.6	82.8	20.6																	32.0356	2798.41			6.1504	137.593			0.332842	58.6898
2019-12-26_06:00:00	2019-12-26 16:00:01	0	9.2	3.86	0.02	0	0	299.46	-5.52	-2.75	26.31	6.16708	63.5182	11.1	28.8	5.8	82.5	13.8																	52.4176	2691.53			6.2001	110.67			0.134749	61.6395
2019-12-26_07:00:00	2019-12-26 17:00:01	0	9.43	3.75	0.01	0	0	298.67	-4.94	-3.14	25.52	5.85348	57.559	11.8	28	5.3	72.8	15.9																	64.8025	2630.66			6.1504	79.7449			0.306337	49.5261
2019-12-26_08:00:00	2019-12-26 18:00:01	0	10.71	4.1	0	0	0.01	297.57	-4.14	-3.34	24.42	5.31932	51.1048	11	26.9	5	67.7	13.6																	47.61	2677.03			6.1504	45.2929			0.101967	38.4812
2019-12-26_09:00:00	2019-12-26 19:00:01	0	11.75	4.47	0	0	0.01	296.2	-3.47	-3.43	23.05	4.87912	45.3323	10.4	25.7	4	68.8	17.5																	35.1649	2700.88			7.0225	17.3056			0.77285	22.6873
2019-12-26_10:00:00	2019-12-26 20:00:01	0	13.23	4.97	0	0	0.01	294.98	-2.94	-3.4	21.83	4.49484	40.8503	6.7	24.8	2.7	71.3	16.3																	2.9929	3043.73			8.8209	8.8209			3.22146	9.47926
2019-12-26_11:00:00	2019-12-26 21:00:01	0	13.55	5.06	0	0	0.01	294.23	-2.52	-3.01	21.08	3.92562	39.9365	8.1	24.1	2.4	81.3	14.9																	9.2416	2881.54			9.1204	9.1204			2.32752	4.88242
2019-12-26_12:00:00	2019-12-26 22:00:01	0	12.75	4.83	0	0.01	0.02	293.77	-2.08	-2.63	20.62	3.3531	38.3397	8.5	23.1	2.5	95.4	17.7																	13.4689	2863.32			6.1504	6.1504			0.727785	3.01753
2019-12-26_13:00:00	2019-12-26 23:00:01	0	10.37	4.13	0	0.01	0.02	293.28	-1.42	-2.83	20.13	3.16628	26.6461	4.7	22.5	2	92.2	15.3																	0.3249	3365.16			5.6169	5.6169			1.3602	1.3602
2019-12-26_14:00:00	2019-12-27 00:00:01	0	9.29	3.83	0	0.01	0.02	292.64	-0.98	-2.86	19.49	3.02324	18.9145	4	22	2.3	93.6	14.7																	0.0289	3482.18			6.3001	9.61			0.523081	1.45744
2019-12-26_15:00:00	2019-12-27 01:00:01	0	9.04	3.76	0	0.01	0.03	292.01	-0.85	-2.76	18.86	2.88792	17.1174	3.6	21.3	1.5	101.8	14																	0.0256	3537.87			5.9536	19.6249			1.92633	1.92633
2019-12-26_16:00:00	2019-12-27 02:00:01	0	9.09	3.78	0	0.01	0.03	291.61	-0.61	-2.78	18.46	2.84614	12.376	4.5	20.6	0.8	97.2	12.8																	0.5184	3429.27			4.5796	30.5809			4.18668	4.18668
2019-12-26_17:00:00	2019-12-27 03:00:01	0	9.23	3.85	0.01	0.01	0.03	291.27	-0.47	-2.65	18.12	2.69136	10.0574	4.7	19.7	0.7	134.1	13.7																	0.7225	3397.72			2.4964	45.8329			3.9655	3.9655
2019-12-26_18:00:00	2019-12-27 04:00:01	0	9.6	4.05	0.01	0.01	0.03	290.9	-0.27	-2.57	17.75	2.58414	5.99748	5.9	18.7	0.4	143	13																	3.4225	3236.47			0.9025	66.2596			4.77048	4.77048
2019-12-26_19:00:00	2019-12-27 05:00:01	0	9.94	4.28	0.02	0.01	0.03	290.6	0	-2.57	17.45	2.57	7.60198e-05	9.2	18.1	0.4	149.5	14.4																	24.2064	2847.29			0.4225	81.7216			4.7089	4.7089
2019-12-26_20:00:00	2019-12-27 06:00:01	0	10.04	4.41	0.02	0.01	0.03	291.25	-0.07	-2.64	18.1	2.64093	1.51893	9.4	18.4	0.4	269.9	17.7																	24.9001	2812.18			0.09	65.4481			5.02176	5.02176
2019-12-26_21:00:00	2019-12-27 07:00:01	0	9.49	4.24	0.02	0.01	0.02	293.02	-0.02	-2.96	19.87	2.96007	0.387204	10.5	21	0.2	337	20.7																	39.1876	2714.41			1.2769	13.8384			7.61797	7.61797
2019-12-26_22:00:00	2019-12-27 08:00:01	0	8.16	3.67	0.01	0	0.01	295.29	-0.12	-2.75	22.14	2.75262	2.49867	8.9	22.5	1.7	19.3	13																	27.3529	2945.23			0.1296	0.1296			1.108	1.108
2019-12-26_23:00:00	2019-12-27 09:00:01	0	6.82	3.1	0.01	0	0.01	297.47	-0.11	-2.42	24.32	2.4225	2.60264	6.9	24.3	1.2	32.7	13.6																	14.44	3230.79			0.0004	16.2409			1.4945	1.4945
2019-12-27_00:00:00	2019-12-27 10:00:01	0	6.02	2.74	0.01	0	0.01	299.56	-0.32	-2.18	26.41	2.20336	8.35084	4.6	26.2	1.8	31	9.9																	3.4596	3540.25			0.0441	64.3204			0.1627	0.1627
2019-12-27_01:00:00	2019-12-27 11:00:01	0	5.79	2.6	0.01	0	0.01	301.35	-1.17	-1.8	28.2	2.14683	33.024	3.4	27.8	2.2	62.1	12.3																	0.64	3701.51			0.16	130.188			0.00282653	0.0532847
2019-12-27_02:00:00	2019-12-27 12:00:01	0	6.4	2.78	0.01	0	0.01	302.71	-2.6	-1.88	29.56	3.20849	54.1303	5.3	29.3	2.6	71.4	11.1																	6.3504	3452.74			0.0676	203.633			0.370259	2.86452
2019-12-27_03:00:00	2019-12-27 13:00:01	0	7.9	3.24	0	0	0.01	303.09	-4.24	-2.05	29.94	4.70958	64.1968	5.4	30.1	3.7	74.5	17.7																	4.6656	3387.24			0.0256	238.702			1.01924	18.4348
2019-12-27_04:00:00	2019-12-27 14:00:01	0	10.15	3.95	0	0	0.01	302.41	-5.49	-2.45	29.26	6.01187	65.9506	8.1	29.7	5.4	87.9	10.2																	17.2225	3001.94			0.1936	206.497			0.374387	53.2297
2019-12-27_05:00:00	2019-12-27 15:00:01	0	11.38	4.31	0	0	0.01	301.54	-5.78	-2.74	28.39	6.39656	64.6369	7.2	29	5.3	74.9	10.3																	8.3521	3061.41			0.3721	163.84			1.20245	57.4649
2019-12-27_06:00:00	2019-12-27 16:00:01	0	11.63	4.39	0	0	0.01	300.72	-5.6	-2.98	27.57	6.34353	61.9808	6.2	28.5	5.1	84.1	11.7																	3.2761	3164.06			0.8649	131.79			1.54637	53.6927
2019-12-27_07:00:00	2019-12-27 17:00:01	0	11.91	4.47	0	0	0.01	299.59	-5.29	-3.14	26.44	6.15172	59.3079	2.5	27.5	4.9	74.3	14.6																	3.8809	3584.42			1.1236	87.4225			1.56681	48.1043
2019-12-27_08:00:00	2019-12-27 18:00:01	0	13.81	5.15	0.01	0	0.01	298.11	-4.56	-3.45	24.96	5.71805	52.8897	3.2	26.7	4.4	69.4	13.9																	3.8025	3421.08			3.0276	49.9849			1.73726	36.0246
2019-12-27_09:00:00	2019-12-27 19:00:01	0	18.91	7.16	0.03	0	0.01	296.51	-3.88	-3.38	23.36	5.14576	48.9399	3.9	25.2	3.5	75.2	15.3																	10.6276	3111.41			3.3856	15.7609			2.70851	20.5187
2019-12-27_10:00:00	2019-12-27 20:00:01	0	21.44	8.4	0.06	0	0.01	295.32	-3.32	-3.25	22.17	4.64596	45.6105	1	24.1	2.9	72.6	14																	54.76	3299.35			3.7249	3.7249			3.04836	11.7646
2019-12-27_11:00:00	2019-12-27 21:00:01	0	23.25	9.78	0.13	0	0.01	294.73	-2.63	-3.07	21.58	4.0425	40.586	4.4	23.3	2.4	75.7	12.8																	28.9444	2773.08			2.9584	2.9584			2.6978	5.4126
2019-12-27_12:00:00	2019-12-27 22:00:01	0	23.38	11.04	0.23	0	0.02	294.4	-1.83	-3.31	21.25	3.7822	28.937	6	22.8	2.1	74.3	14.2																	25.4016	2480.04			2.4025	2.4025			2.82978	3.11945
2019-12-27_13:00:00	2019-12-27 23:00:01	0	21.18	10.23	0.21	0.01	0.02	293.92	-1.2	-3.32	20.77	3.53021	19.8723	6.3	22.4	2.1	59.8	15.9																	15.4449	2531.1			2.6569	2.6569			2.04551	2.29284
2019-12-27_14:00:00	2019-12-28 00:00:01	0	18.93	8.97	0.16	0.01	0.03	293.47	-0.97	-3.24	20.32	3.38209	16.6669	7.1	21.9	1.5	75.9	16.8																	3.4969	2577.59			2.4964	5.6169			3.54224	3.54224
2019-12-27_15:00:00	2019-12-28 01:00:01	0	17.04	7.91	0.12	0.01	0.03	292.91	-0.74	-2.97	19.76	3.0608	13.9909	7.4	21.2	1	75.5	17																	0.2601	2655.34			2.0736	13.1769			4.2469	4.2469
2019-12-27_16:00:00	2019-12-28 02:00:01	0	15.57	7.28	0.1	0.01	0.03	292.44	-1.01	-3.11	19.29	3.26989	17.9918	8.9	19.6	0.4	66	15.6																	2.6244	2566.44			0.0961	32.49			8.23629	8.23629
2019-12-27_17:00:00	2019-12-28 03:00:01	0	14.72	7.28	0.12	0.01	0.03	292.01	-1.11	-2.93	18.86	3.13321	20.7488	7.9	18.7	0.3	105.8	15.5																	0.3844	2668.76			0.0256	49.4209			8.02707	8.02707
2019-12-27_18:00:00	2019-12-28 04:00:01	0	13.82	7.27	0.14	0.01	0.03	291.75	-1.14	-2.63	18.6	2.86644	23.4349	11.5	17.8	0.3	227.1	16.3																	17.8929	2310.72			0.64	67.0761			6.58663	6.58663
2019-12-27_19:00:00	2019-12-28 05:00:01	0	13.26	7.44	0.16	0.01	0.03	291.43	-0.96	-2.45	18.28	2.63137	21.3972	12.5	17	0.3	218.7	16.6																	25.6036	2199.61			1.6384	86.6761			5.43528	5.43528
2019-12-27_20:00:00	2019-12-28 06:00:01	0	13.82	8.41	0.22	0.01	0.03	291.85	-0.42	-1.8	18.7	1.84835	13.1341	11.3	17.5	0.4	238.8	20.4																	8.3521	2221.24			1.44	70.3921			2.09772	3.48811
2019-12-27_21:00:00	2019-12-28 07:00:01	0	15.06	9.76	0.3	0.01	0.03	293.66	-0.05	-0.82	20.51	0.821523	3.4894	8.5	20.4	0.3	1.8	25.4																	1.5876	2360.02			0.0121	13.5424			0.271986	8.96689
2019-12-27_22:00:00	2019-12-28 08:00:01	0	15.78	10.78	0.36	0.01	0.03	296.23	-0.93	-0.15	23.08	0.942019	80.8378	14.6	22.3	1.4	39.3	17																	14.5924	1718.93			0.6084	0.6241			0.209746	3.14701
2019-12-27_23:00:00	2019-12-28 09:00:01	0	16.76	12.14	0.44	0.01	0.03	299.51	-1.44	-0.48	26.36	1.51789	71.5652	8.9	24.5	1	19.7	15.7																	10.4976	2097.64			3.4596	39.3129			0.268213	2.55395
2019-12-28_00:00:00	2019-12-28 10:00:01	0	19.14	14.68	0.57	0.01	0.02	302.94	-1.65	-0.64	29.79	1.76977	68.7999	5.9	27	1.3	22.7	17.4																	77.0884	2139.99			7.7841	148.84			0.220688	1.09459
2019-12-28_01:00:00	2019-12-28 11:00:01	0	22.68	18.21	0.74	0.01	0.02	305.75	-2.14	-0.71	32.6	2.25471	71.6455	11.2	29.4	1.7	47.5	18.8																	49.1401	1401			10.24	303.108			0.307699	0.307699
2019-12-28_02:00:00	2019-12-28 12:00:01	0	27.06	22.28	0.93	0.01	0.02	307.61	-3.1	-1.21	34.46	3.32778	68.6783	12.7	32.1	2.5	54.3	19.6																	91.7764	1015.06			5.5696	482.681			0.685215	2.93018
2019-12-28_03:00:00	2019-12-28 13:00:01	0	30.08	24.78	1.04	0.01	0.02	308.58	-3.8	-1.85	35.43	4.22641	64.0414	10.1	33.9	3.1	84	26.5																	215.502	1021.44			2.3409	612.068			1.26879	10.3067
2019-12-28_04:00:00	2019-12-28 14:00:01	0	28.79	22.92	0.93	0.01	0.01	308.99	-4.42	-2.63	35.84	5.14328	59.2465	8.8	34.2	4.1	92.1	35.6																	199.374	1233.41			2.6896	647.703			1.08843	26.289
2019-12-28_05:00:00	2019-12-28 15:00:01	0	25.76	19	0.72	0	0.01	308.74	-4.85	-3.3	35.59	5.86622	55.7683	17.9	34.1	5	89.5	33.1																	1.21	896.404			2.2201	630.01			0.750332	45.5654
2019-12-28_06:00:00	2019-12-28 16:00:01	0	21.41	12.96	0.38	0	0.01	307.12	-5.07	-3.04	33.97	5.91156	59.053	19.7	33.3	4.7	88.2	29.3																	45.4276	1168.27			0.4489	514.382			1.46787	42.1923
2019-12-28_07:00:00	2019-12-28 17:00:01	0	21.06	11.04	0.25	0	0.01	305.03	-4.69	-2.79	31.88	5.45712	59.2524	19.8	32.4	3.8	86.1	26.5																	76.7376	1296			0.2704	387.696			2.74606	26.4312
2019-12-28_08:00:00	2019-12-28 18:00:01	0	23.19	12.07	0.27	0	0.01	303.01	-3.79	-2.75	29.86	4.68258	54.0357	19.2	30.8	4.1	91.8	28.1																	50.8369	1265.22			0.8836	258.245			0.339405	21.777
2019-12-28_09:00:00	2019-12-28 19:00:01	0	24.75	12.32	0.26	0	0.02	301.14	-2.4	-1.3	27.99	2.72947	61.5572	17.4	29	3.1	100.7	26.3																	25.8064	1377.89			1.0201	153.76			0.137293	2.93598
2019-12-28_10:00:00	2019-12-28 20:00:01	0	25.12	12.5	0.27	0.01	0.02	300.06	-1.45	-0.24	26.91	1.46973	80.6019	13.4	27.5	2.2	103.2	24.7																	0.81	1676.08			0.3481	96.4324			0.533297	0.533297
2019-12-28_11:00:00	2019-12-28 21:00:01	0	23.36	11.9	0.27	0.01	0.02	299.44	-2.18	-2.97	26.29	3.6842	36.279	15.1	25.7	0.9	124.1	27																	10.24	1587.23			0.3481	54.76			7.75175	7.75175
2019-12-28_12:00:00	2019-12-28 22:00:01	0	19.28	9.7	0.19	0.01	0.02	299.08	-1.42	-4.43	25.93	4.65202	17.7729	10.3	24.1	0.8	125.6	24.6																	0.36	2193.99			3.3489	29.5936			14.8381	14.8381
2019-12-28_13:00:00	2019-12-28 23:00:01	0	17.66	9.2	0.19	0.01	0.02	298.68	-0.12	-3.36	25.53	3.36214	2.04549	4.3	23.6	0.7	146.4	23.9																	24.01	2845.16			3.7249	20.6116			7.087	7.087
2019-12-28_14:00:00	2019-12-29 00:00:01	0	20.18	12.27	0.38	0.01	0.02	298.2	-0.42	-2.94	25.05	2.96985	8.13019	1.8	23	1.3	134.5	27.3																	109.621	2784.67			4.2025	11.9716			2.78839	2.78839
2019-12-28_15:00:00	2019-12-29 01:00:01	0	25.14	17.41	0.66	0.01	0.03	297.43	-1.52	-0.96	24.28	1.79778	57.7245	3.1	22.2	2.2	117.3	29.7																	204.776	2146.47			4.3264	4.3264			0.161784	0.161784
2019-12-28_16:00:00	2019-12-29 02:00:01	0	28.86	21.09	0.85	0.01	0.04	296.51	-2.15	-1.29	23.36	2.50731	59.0364	3.3	21.3	1	137.8	26.9																	316.484	1802			4.2436	4.2436			2.27198	2.27198
2019-12-28_17:00:00	2019-12-29 03:00:01	0	33.75	25.93	1.09	0.01	0.04	295.78	-1.73	-1.71	22.63	2.43249	45.3332	5.4	20.3	0.6	178.6	25.3																	421.481	1260.96			5.4289	5.4289			3.35801	3.35801
2019-12-28_18:00:00	2019-12-29 04:00:01	0	41.56	33.72	1.5	0.01	0.04	295.38	-1.25	-1.49	22.23	1.94489	39.9943	7.9	19.7	0.7	183.1	25.1																	666.672	666.672			6.4009	7.0756			1.54975	2.16416
2019-12-28_19:00:00	2019-12-29 05:00:01	0	48.25	40.49	1.85	0.01	0.04	294.81	-0.4	-1.16	21.66	1.22703	19.0257	5.7	19.3	0.6	162.2	22.8																	1210.34	1210.34			5.5696	13.1769			0.393165	5.23939
2019-12-28_20:00:00	2019-12-29 06:00:01	0	55.01	47.2	2.18	0.01	0.04	295.45	-0.3	-1.3	22.3	1.33417	12.9947	2.5	19.2	0.3	161	23.1																	1998.09	1998.09			9.61	9.61			1.0695	6.1595
2019-12-28_21:00:00	2019-12-29 07:00:01	0	61.06	53.09	2.46	0.02	0.05	297.33	-0.1	-1.09	24.18	1.09458	5.2419	5	19.8	0.7	254.2	25.4																	2312.65	2312.65			19.1844	19.1844			0.155691	5.389
2019-12-28_22:00:00	2019-12-29 08:00:01	0	67.3	59.09	2.75	0.02	0.04	299.82	0.07	-0.62	26.67	0.623939	353.558	6.6	21.3	0.2	293.9	26.2																	2755.2	2755.2			28.8369	28.8369			0.179724	10.8377
2019-12-28_23:00:00	2019-12-29 09:00:01	0	71.56	63.28	2.95	0.02	0.04	302.66	-0.18	-0.2	29.51	0.269072	41.9873	8.9	22.6	0.6	316.7	24.7																	2957.18	2957.18			47.7481	56.5504			0.109513	10.5425
2019-12-29_00:00:00	2019-12-29 10:00:01	0	74.48	66.23	3.09	0.01	0.04	305.36	-0.43	0.11	32.21	0.443847	104.349	8.6	25	0.9	40.7	23.2																	3321.22	3321.22			51.9841	159.264			0.208076	7.68483
2019-12-29_01:00:00	2019-12-29 11:00:01	0	72.72	64.91	3.01	0.01	0.03	307.91	-0.75	-0.77	34.76	1.0749	44.2463	12.7	27.7	1.1	78.1	30.8																	2725.88	2725.88			49.8436	319.337			0.000630244	3.76789
2019-12-29_02:00:00	2019-12-29 12:00:01	0.01	66.86	59.69	2.72	0.01	0.02	309.79	-1.53	-0.78	36.64	1.71735	62.9875	17.4	29.9	1.4	48	31.9																	1788.44	1788.44			45.4276	481.803			0.100713	0.997297
2019-12-29_03:00:00	2019-12-29 13:00:01	0.01	64.28	57.07	2.58	0.01	0.02	310.26	-3.39	-1.09	37.11	3.56093	72.1758	19.4	31.2	2	52.5	49.7																	1419.03	1419.03			34.9281	562.638			2.43649	2.43649
2019-12-29_04:00:00	2019-12-29 14:00:01	0	59.07	51.31	2.28	0.01	0.03	309.54	-4.74	-1.92	36.39	5.1141	67.9491	35.9	32.2	2.3	78.6	91																	237.468	414.937			17.5561	576			7.91915	10.8775
2019-12-29_05:00:00	2019-12-29 15:00:01	0.01	41.36	33.64	1.39	0.01	0.02	308.86	-4.9	-1.83	35.71	5.23057	69.521	47.9	32.3	2.8	85.8	76.3																	203.348	216.09			11.6281	548.496			5.90769	15.3239
2019-12-29_06:00:00	2019-12-29 16:00:01	0	30.08	22.32	0.82	0.01	0.02	308.12	-4.05	-0.91	34.97	4.15098	77.3366	39.9	32.1	3.6	94.6	61.2																	309.056	309.056			8.2369	505.35			0.303574	13.213
2019-12-29_07:00:00	2019-12-29 17:00:01	0.01	26.52	18.07	0.58	0.01	0.02	306.49	-4.06	-1.81	33.34	4.44519	65.9722	44.3	31.6	2.8	120.3	79.5																	688.013	688.013			3.0276	414.123			2.70664	9.79182
2019-12-29_08:00:00	2019-12-29 18:00:01	0.01	25.35	16.31	0.48	0	0.01	304.72	-3.52	-3.12	31.57	4.7037	48.4475	55.6	30.4	2.4	126.4	74.7																	1543.7	1543.7			1.3689	302.064			5.30704	8.92636
2019-12-29_09:00:00	2019-12-29 19:00:01	0.01	24.16	14.97	0.4	0.01	0.02	303.41	-1.61	-2.19	30.26	2.71812	36.3219	49.1	28.6	1.8	127.3	67																	1164.86	1164.86			2.7556	203.633			0.842952	0.842952
2019-12-29_10:00:00	2019-12-29 20:00:01	0	23.88	14.12	0.35	0.01	0.03	302.77	-2.58	0.63	29.62	2.6558	103.722	41.9	26.8	2.2	119.5	61.8																	771.728	771.728			7.9524	139.949			0.207758	0.547311
2019-12-29_11:00:00	2019-12-29 21:00:01	0	22.51	12.53	0.26	0.01	0.03	301.56	-2.74	-1.25	28.41	3.01166	65.4775	35.4	24.7	2.5	96.7	55.9																	523.037	523.037			13.7641	72.5904			0.261797	1.94787
2019-12-29_12:00:00	2019-12-29 22:00:01	0	20.67	11.03	0.19	0.01	0.03	300.33	-2.79	-2.22	27.18	3.56546	51.4909	24.9	23.2	2.6	102.6	38.3																	192.377	955.428			15.8404	33.5241			0.932112	4.20028
2019-12-29_13:00:00	2019-12-29 23:00:01	0	18.61	9.47	0.13	0.01	0.03	299.35	-1.89	-2.61	26.2	3.22245	35.9098	16.6	22.4	1.8	108.7	33.1																	50.8369	1662.19			14.44	16.0801			2.02337	2.02337
2019-12-29_14:00:00	2019-12-30 00:00:01	0	16.68	8.39	0.11	0.01	0.03	298.5	-0.99	-2.72	25.35	2.89456	20.0001	12.9	21.7	0.8	125	31																	20.3401	2074.8			13.3225	13.3225			4.3872	4.3872
2019-12-29_15:00:00	2019-12-30 01:00:01	0	18.7	11.01	0.27	0.01	0.03	297.82	-0.31	-2.77	24.67	2.78729	6.38567	11.9	20.9	0.8	182	28																	0.7921	1929.84			14.2129	14.2129			3.94933	3.94933
2019-12-29_16:00:00	2019-12-30 02:00:01	0.01	24.44	17.12	0.61	0.01	0.03	297.51	-0.12	-1.9	24.36	1.90379	3.61396	8.1	20.3	1.2	141.3	24.4																	81.3604	1732.22			16.4836	16.4836			0.495314	1.02458
2019-12-29_17:00:00	2019-12-30 03:00:01	0.01	30.03	22.81	0.91	0.01	0.04	297.08	-1.24	-1.05	23.93	1.62484	49.7431	5.5	20.1	1.3	130	26.5																	299.636	1484.56			14.6689	14.6689			0.10552	1.41887
2019-12-29_18:00:00	2019-12-30 04:00:01	0.01	33.57	26.39	1.09	0.01	0.05	296.37	-1.48	-1.12	23.22	1.85602	52.8833	7.4	19.4	0.6	146.9	21.7																	360.62	1092.3			14.5924	14.5924			1.57758	2.75554
2019-12-29_19:00:00	2019-12-30 05:00:01	0.01	36.58	29.41	1.24	0.01	0.05	295.8	-1.22	-1.25	22.65	1.74668	44.3042	7.5	18.9	0.4	197	20.2																	480.048	895.805			14.0625	14.0625			1.81355	3.87821
2019-12-29_20:00:00	2019-12-30 06:00:01	0.01	38.62	31.57	1.34	0.01	0.05	296.42	-0.74	-1.13	23.27	1.35074	33.2196	6.6	19.3	0.6	186.3	25.8																	623.501	821.969			15.7609	15.7609			0.563611	4.68835
2019-12-29_21:00:00	2019-12-30 07:00:01	0.01	39.5	32.59	1.39	0.02	0.05	298.25	-0.31	-0.61	25.1	0.684251	26.9396	4.8	20.5	0.6	177.6	27																	772.284	867.303			21.16	21.16			0.0070983	8.0188
2019-12-29_22:00:00	2019-12-30 08:00:01	0.02	39.64	32.9	1.4	0.02	0.05	300.57	-0.71	-0.01	27.42	0.71007	89.1932	9.1	21.7	0.2	97.2	28.3																	566.44	617.026			32.7184	32.7184			0.260172	10.278
2019-12-29_23:00:00	2019-12-30 09:00:01	0.02	40	33.37	1.41	0.01	0.05	303.31	-1.23	0.18	30.16	1.2431	98.3255	10.2	23.8	0.3	274.5	28.6																	536.849	541.493			40.4496	87.7969			0.889439	6.61981
2019-12-30_00:00:00	2019-12-30 10:00:01	0.04	42.73	35.89	1.53	0.01	0.04	306.37	-1.44	-0.21	33.22	1.45523	81.703	10	26.3	0.5	346.1	27.2																	670.292	670.292			47.8864	222.905			0.912468	4.66892
2019-12-30_01:00:00	2019-12-30 11:00:01	0.12	47.34	39.72	1.71	0.01	0.02	309.1	-1.85	-0.65	35.95	1.96087	70.6411	8.3	29.2	1.1	68.5	31.4																	987.216	987.216			45.5625	422.714			0.741092	1.11331
2019-12-30_02:00:00	2019-12-30 12:00:01	0.34	50.82	42.16	1.8	0.01	0.02	310.74	-2.92	-1.31	37.59	3.20039	65.8377	10.6	31.7	1.8	63.5	35.7																	996.034	996.034			34.6921	610.09			1.96109	1.96109
2019-12-30_03:00:00	2019-12-30 13:00:01	0.4	51	41.82	1.78	0.01	0.02	311.04	-4.2	-1.84	37.89	4.58537	66.3421	9	34.4	2.6	72.9	39.6																	1077.15	1077.15			12.1801	767.29			3.94169	9.42102
2019-12-30_04:00:00	2019-12-30 14:00:01	0.32	43.6	34.03	1.39	0.01	0.02	310.59	-5.25	-2.35	37.44	5.75196	65.8859	17.6	36.2	3.4	70.4	67.9																	269.945	269.945			1.5376	843.902			5.5317	25.3609
2019-12-30_05:00:00	2019-12-30 15:00:01	0.22	33.81	23.64	0.86	0.01	0.01	309.79	-5.45	-2.75	36.64	6.10451	63.2252	27.3	35.2	4.3	87.8	56.5																	13.3956	252.81			2.0736	742.563			3.25624	39.5453
2019-12-30_06:00:00	2019-12-30 16:00:01	0.11	29.52	18.52	0.57	0	0.01	308.41	-5.17	-3.07	35.26	6.0128	59.2978	34.2	33.3	4.8	94.3	60.2																	245.862	245.862			3.8416	574.561			1.47089	44.8472
2019-12-30_07:00:00	2019-12-30 17:00:01	0.05	27.53	15.83	0.42	0	0.01	306.92	-3.88	-3.2	33.77	5.02935	50.4863	42.7	33	3.8	96.4	57.6																	721.997	721.997			0.5929	491.952			1.51131	22.2157
2019-12-30_08:00:00	2019-12-30 18:00:01	0.02	26.26	13.58	0.3	0	0.01	305.29	-2.99	-2.64	32.14	3.9887	48.5574	44.2	32.7	3.2	84.3	78.7																	937.584	937.584			0.3136	410.063			0.622042	9.44146
2019-12-30_09:00:00	2019-12-30 19:00:01	0.02	26.75	12.62	0.23	0	0.02	303.4	-3.21	-2.11	30.25	3.84138	56.6824	58.8	30.5	1.9	119.6	69.3																	2132.59	2132.59			0.0625	261.146			3.76896	3.76896
2019-12-30_10:00:00	2019-12-30 20:00:01	0.03	26.21	11.88	0.18	0.01	0.02	302.1	-2.47	-3.09	28.95	3.95588	38.6373	38.1	27.9	1.2	129.4	42																	687.488	687.488			1.1025	150.308			7.59488	7.59488
2019-12-30_11:00:00	2019-12-30 21:00:01	0.02	20.92	10.45	0.21	0	0.02	302.77	-2.53	-5.38	29.62	5.94519	25.1858	16.8	26.4	1.1	125	44.8																	40.3225	1567.37			10.3684	130.645			23.4759	23.4759
2019-12-30_12:00:00	2019-12-30 22:00:01	0.03	28.67	20.02	0.84	0.01	0.01	303.83	-0.55	-4.99	30.68	5.02022	6.28986	9.2	25	0.9	119.7	39.9																	117.072	1415.26			32.2624	122.988			16.9762	16.9762
2019-12-30_13:00:00	2019-12-30 23:00:01	0.01	37.64	27.73	1.24	0.01	0.02	301.97	0.08	-3.54	28.82	3.5409	358.705	11.3	24.2	1.5	109.9	40.1																	269.945	773.396			21.3444	71.0649			4.16529	4.16529
2019-12-30_14:00:00	2019-12-31 00:00:01	0.02	42.72	32.45	1.48	0.01	0.03	300.24	-0.09	-2.87	27.09	2.87141	1.79622	14.5	23.1	0.9	123.5	39.6																	322.203	395.612			15.9201	31.36			3.88646	3.88646
2019-12-30_15:00:00	2019-12-31 01:00:01	0.08	50.14	39.67	1.86	0.01	0.03	299.44	0.02	-1.97	26.29	1.9701	359.418	15.7	22	0.8	127.9	38.2																	574.561	574.561			18.4041	18.4041			1.36914	1.81144
2019-12-30_16:00:00	2019-12-31 02:00:01	0.23	53.75	43.35	2	0.01	0.03	298.97	-0.08	-1.81	25.82	1.81177	2.53084	18.8	21	0.5	148.3	41.7																	602.702	602.702			23.2324	23.2324			1.72073	3.25526
2019-12-30_17:00:00	2019-12-31 03:00:01	0.28	43.09	34.36	1.49	0.01	0.03	299.71	0.44	-1.37	26.56	1.43892	342.195	19	20	0.3	210.3	45.7																	235.93	235.93			43.0336	43.0336			1.29715	5.65049
2019-12-30_18:00:00	2019-12-31 04:00:01	0.21	29.68	22.74	0.9	0.01	0.02	300.19	0.59	-2.63	27.04	2.69537	347.356	22.6	19.4	0.2	235	45.7																	0.0196	462.25			58.3696	58.3696			6.22685	6.22685
2019-12-30_19:00:00	2019-12-31 05:00:01	0.11	18.4	13.09	0.45	0	0.01	300.07	0.83	-2.89	26.92	3.00683	343.976	24.4	19.1	0.5	249	45.4																	127.916	861.423			61.1524	61.1524			6.28417	6.28417
2019-12-30_20:00:00	2019-12-31 06:00:01	0.05	12.93	8.64	0.27	0	0.01	301.33	1.3	-2.94	28.18	3.21459	336.146	23.1	19.3	0.8	236.5	52.2																	209.092	1232.01			78.8544	78.8544			5.83025	5.83025
2019-12-30_21:00:00	2019-12-31 07:00:01	0.02	9.27	5.79	0.16	0	0.02	303.48	1.61	-2.82	30.33	3.24723	330.277	25	21.3	0.9	242.1	55.5																	369.024	1299.6			81.5409	81.5409			5.50949	5.50949
2019-12-30_22:00:00	2019-12-31 08:00:01	0	6.31	3.61	0.08	0	0.01	305.9	1.87	-2.81	32.75	3.37535	326.357	31.5	24.4	0.9	265.3	59.8																	777.852	1006.79			69.7225	157.754			6.12737	6.12737
2019-12-30_23:00:00	2019-12-31 09:00:01	0	5.3	3.02	0.06	0	0.01	308.21	2.39	-2.69	35.06	3.59836	318.38	34.7	29.5	1.4	343.4	77.9																	1003.62	1003.62			30.9136	398.801			4.83279	4.83279
2019-12-31_00:00:00	2019-12-31 10:00:01	0.02	5.94	3.6	0.09	0	0.01	310.16	2.59	-3.15	37.01	4.07806	320.572	72.2	35.6	2.7	346.1	148.4																	4705.96	4705.96			1.9881	785.12			1.89906	7.08658
2019-12-31_01:00:00	2019-12-31 11:00:01	0.06	8.62	5.72	0.18	0	0.01	311.31	2.7	-3.72	38.16	4.59656	324.028																						32.7184	3735.65			1456.19	1456.19			21.1284	21.1284
2019-12-31_02:00:00	2019-12-31 12:00:01	0.11	11.77	8.2	0.28	0	0	312.13	2.93	-4.16	38.98	5.08827	324.842																						67.24	3438.65			1519.44	1519.44			25.8905	25.8905
2019-12-31_03:00:00	2019-12-31 13:00:01	0.2	15.75	11.49	0.42	0	0	312.71	2.82	-4.65	39.56	5.43828	328.765																						132.02	3063.62			1564.99	1564.99			29.5749	29.5749
2019-12-31_04:00:00	2019-12-31 14:00:01	0.26	19.7	14.97	0.6	0	0	313.1	2.56	-4.75	39.95	5.39593	331.678																						224.101	2690.5			1596	1596			29.1161	29.1161
2019-12-31_05:00:00	2019-12-31 15:00:01	0.21	19.93	15.35	0.62	0	0	313.38	2.53	-4.58	40.23	5.23233	331.084																						235.623	2651.22			1618.45	1618.45			27.3773	27.3773
2019-12-31_06:00:00	2019-12-31 16:00:01	0.1	17.77	13.69	0.56	0	0	313.39	2.86	-4.26	40.24	5.131	326.124																						187.416	2824.92			1619.26	1619.26			26.3272	26.3272
2019-12-31_07:00:00	2019-12-31 17:00:01	0.04	14.24	10.73	0.43	0	0	313.18	3.05	-4.11	40.03	5.11807	323.421																						115.133	3148.33			1602.4	1602.4			26.1946	26.1946
2019-12-31_08:00:00	2019-12-31 18:00:01	0.01	11.65	8.54	0.33	0	0	312.56	1.88	-4.23	39.41	4.62896	336.038																						72.9316	3398.89			1553.15	1553.15			21.4273	21.4273
2019-12-31_09:00:00	2019-12-31 19:00:01	0.05	31.48	24.99	1.19	0.01	0.02	309.85	-1.19	-4.08	36.7	4.25	16.2603																						624.5	1751.42			1346.89	1346.89			18.0625	18.0625
2019-12-31_10:00:00	2019-12-31 20:00:01	0.08	49.71	39.4	1.87	0.01	0.02	306.27	-2.07	-3.23	33.12	3.83638	32.6546																						1552.36	1552.36			1096.93	1096.93			14.7178	14.7178
2019-12-31_11:00:00	2019-12-31 21:00:01	0.24	73.82	32.2	0.56	0	0.01	299.47	-3.65	6.09	26.32	7.10004	149.064																						1036.84	1199.93			692.742	692.742			50.4106	50.4106
2019-12-31_12:00:00	2019-12-31 22:00:01	0.26	76.95	29.01	0.23	0	0.01	295.79	-2.52	5.81	22.64	6.33297	156.552																						841.58	1431.11			512.57	512.57			40.1065	40.1065
2019-12-31_13:00:00	2019-12-31 23:00:01	0.31	67.98	26.32	0.28	0	0.01	295.25	-0.69	4.72	22.1	4.77017	171.683																						692.742	1641.87			488.41	505.8			22.7545	22.7545
2019-12-31_14:00:00	2020-01-01 00:00:01	0.38	65.01	26.02	0.34	0	0.01	294.67	0.16	3.79	21.52	3.79338	182.417																						677.04	1666.27			463.11	532.225			14.3897	14.3897
2019-12-31_15:00:00	2020-01-01 01:00:01	0.42	62.88	26.52	0.43	0	0.02	294.27	0.36	3.23	21.12	3.25	186.36																						703.31	1625.7			446.054	550.841			10.5625	10.5625
2019-12-31_16:00:00	2020-01-01 02:00:01	0.5	62.84	27.68	0.52	0	0.02	293.83	0.1	3.88	20.68	3.88129	181.476																						766.182	1533.51			427.662	571.688			15.0644	15.0644
2019-12-31_17:00:00	2020-01-01 03:00:01	0.51	64.56	30.2	0.66	0.01	0.02	293.3	-0.69	3.59	20.15	3.65571	169.12																						912.04	1342.49			406.023	597.314			13.3642	13.3642
2019-12-31_18:00:00	2020-01-01 04:00:01	0.43	64.34	31.27	0.76	0.01	0.02	292.98	-0.24	3.47	19.83	3.47829	176.043																						977.813	1265.22			393.229	613.058			12.0985	12.0985
2019-12-31_19:00:00	2020-01-01 05:00:01	0.4	65.5	33.41	0.89	0.01	0.02	292.71	-0.64	2.2	19.56	2.2912	163.78																						1116.23	1117.56			382.594	626.501			5.2496	5.2496
2019-12-31_20:00:00	2020-01-01 06:00:01	0.39	66.43	35.41	1	0.01	0.02	293.05	-0.38	1.88	19.9	1.91802	168.573																						1253.87	1253.87			396.01	609.596			3.6788	4.83112
2019-12-31_21:00:00	2020-01-01 07:00:01	0.39	64.19	35.03	0.99	0.01	0.02	294.12	-0.71	1.04	20.97	1.25925	145.679																						1227.1	1227.1			439.741	557.904			1.5857	8.16104
2019-12-31_22:00:00	2020-01-01 08:00:01	0.37	59.89	33.13	0.93	0.01	0.03	296.08	-0.85	0.24	22.93	0.883233	105.767																						1097.6	1136.36			525.785	525.785			0.7801	10.4508
2019-12-31_23:00:00	2020-01-01 09:00:01	0.32	51.99	28.79	0.79	0.01	0.03	299.03	-1.38	-1.23	25.88	1.84859	48.2894																						828.864	1447.8			669.774	669.774			3.4173	5.14113
2020-01-01_00:00:00	2020-01-01 10:00:01	0.26	41.96	23.2	0.61	0.01	0.02	302.47	-1.01	-1.21	29.32	1.57613	39.8522																						538.24	1904.45			859.662	859.662			2.4842	6.45092
																																			2.48964e+06	4.13332e+06			48478.7	114054			2813.84	8938.95
															23	1.2	83.5
															23.6	2.1	94.7	82.6
															24.6	2.3	99.9	73.9
															25.7	2.8	95.6	62.4
															26.3	3.3	102.6	32.3
															25.6	4.8	104.2	22.7
															24.8	4.3	108.6	31.2
														0.4	23.6	3.7	119.2	41.1
														2.6	22.9	3.5	114.1	36
														-1.5	22.7	3.2	111.7	31.5
														-0.4	22.6	2.4	117.3	37
														8.9	22.5	1.6	128.9	40.9
														17	22.4	1.5	134.9	40.1
														18.5	22.2	1.4	136.9	41.7
														22.7	22	0.8	155.7	46.2
														37.2	21.7	0.9	189.5	57.7
														41.5	21.6	0.8	195.2	64.5
														37.5	21.5	0.8	193.5	64.4
														36.6	21.3	0.8	191.5	62
														35.1	21.6	0.8	207.7	60.7
														35.6	22.4	0.9	211.9	58
														33.2	23.2	0.3	140.9	47.3
														24.8	24.7	0.5	113.1	47.4
														19.8	26.5	1.4	61.8	48.3
														21.3	28.2	1.8	17.8	45.5
														24.7	30	2.5	37.9	52.6
															31.6	3.6	92.3	48.1
															32.1	4	86.3	47.5
														27.1	31.4	5.3	93.2	46.8
														26.4	30.2	5.8	88.4	30.2
														23.8	29.1	5	81.9	27.5
														22.4	28.7	4.4	78.1	21.2
														10.2	27.4	3.6	69.1	22.2
														7.1	26.6	2.5	83.9	18.8
														11.3	26.1	1.9	97	19
														11.7	25.3	1.7	112.9	23.5
														9.8	24.3	1.5	115.1	23.6
														8.1	23.7	1.4	127	25.4
														8.9	23	0.9	127.1	24.6
														11.4	22.5	0.6	148.3	25.5
														10.7	21.8	0.4	182.3	23.7
														9.5	21.2	0.3	197.5	23.9
														7.1	21	0.3	234.3	24.3
														11.8	21.5	0.5	245.1	27
														12.9	23.1	0.9	304.6	30.7
														14.4	25.9	1	297.9	26.3
														14.1	29.1	1.6	341.3	40.6
														26.4	32.9	2.3	357.2	65.3
														43.4	37.9	2.3	357.7	77.6
														45.9	42.4	3.2	306.9	66.1
														42.6	44.9	5.3	280.8	48.3
														35.3	46.2	6.2	269	65.6
														26.6	46.8	6.1	282.9	55.7
														22.4	46.5	5.4	288.7
															22.3	2.3	103.4
															22.9	2.5	90.2	54.7
															23.1	1.9	94.1	48.8
															22.9	2.4	126.1	45.8
															22.1	2.6	122.5	41.2
															22.3	1.9	104.5	37.5
														-5.6	21.7	1.6	134.3	32.1
															21.8	2.2	118.3	25.8
														-9.9	21.5	2	92.3	18.7
														-4.6	21.1	1.5	105.9	12.8
														2.1	20.5	1.2	90.4	11.7
														5.7	20.5	1.2	268.7	11.7
														-0.2	20.1	3.1	263.5	7.1
														1.5	19.7	2.3	269.3	7.8
														0	19.7	3.3	276.4	14.6
														3.7	19.9	2.3	252.7	13.4
														7.2	20	2.3	292.2	13.7
														8.1	20.2	1.8	319.6	23.2
														18.4	20.8	1.7	31.1	45.9
														44.5	22	0.2	222.1	41.1
														30.6	23.8	2.1	41.9	14.5
														0.3	25.9	2.1	23.8	15.3
														-4.2	28.1	3.8	27.3	15.8
														2.2	29.3	3.2	13.7	23.3
														3.9	30.6	3.1	26.5	24.6
														12.4	30.9	3.1	27.8	28.5
														16.8	31.9	3.2	20.7	26.9
														17.1	33.3	2.8	54.7	34.9
														18.2	31.7	4.6	100.4	49.3
														19.5	28.6	3.6	123.3	51.5
														24.1	27.4	3.5	99.9	43.4
														22.8	26.4	2.3	119.6	47
														19.1	25.5	2.6	132.2	48
														17.6	24.2	1.8	147.5	46.9
														21.9	24.1	2.5	225.2	46.9
														17.2	22.9	1.7	152.1	48.8
														13.3	21.6	1.1	230.3	25.8
														17.1	22.1	1.1	188.7	39.3
														22.3	22	0.8	167.5	46.2
														30	21.5	0.7	111.6	52.2
														37.5	21.3	0.6	149.7	58.3
														44.8	21.4	0.7	144.8	71
														50	22	0.7	142.2	78.3
														55	22.7	0.6	142.6	82.4
														69.2	23.8	1.1	131.7	114.7
														81.9	24.9	1.8	122.5	116.3
														85.1	26.1	2.1	133.2	118.8
														78.9	26.8	1.9	152.7	111
														85.6	26.9	2.3	142.8	129.3
														105.7	26.8	2.5	144	149.4
														114.3	26.2	2.6	146.1	163.6
														128.6	25.3	3.7	129.2	168.3
														131.2	25	2.3	143	160.8
														125.3	24	2.3	144.7	157.4
														111.2	23	1.8	152	115.5
														74.2	22.6	1.4	163.5	73.2
														60.8	22.5	1.3	172.9	86.4
														78.5	22.3	0.9	187.5	103.7
														83.1	22.3	0.8	216.2	95.2
														82.7	21.9	1.2	238.8	96.4
														80.3	21.6	1.4	238.4	94.6
														76.6	21.6	1.1	220.5	89.6
														70.7	21.5	0.4	143.7	85.2
														67.2	21.4	0.3	143.3	68.1
														54.5	21.4	0.5	185.2	35.7
														28.3	21.6	0.8	182.5	11.2
														13.5	21.8	1	179.5	4.5
														5.4	22	0.8	172.3	0.9
														2.8	22.3	1.5	141.6	6
														2.9	22.9	1.2	157.3	2.7
														2.7	24.1	1.4	142.2	1.1
														1.2	25.1	2	140.4	-0.5
														1	25.9	1.6	140.8	2.5
														1.7	26.2	2.5	126.6	5
														5.1	26.1	2.4	118.7	5.6
														5.9	25.7	2.7	129.7	1.7
														3.6	25	2.3	135.1	5.5
														2.8	24.2	1.9	143.5	7.6
														4.8	23.6	1.7	141	5
														3.9	23	1.5	139.2	9.6
														-1.5	22.7	1.2	140.1	10.1
														-3.2	22.6	0.8	136.3	6.4
														0.6	22.4	0.5	167.6	5.8
														2.7	22.3	0.4	166.5	5.4
														6.3	22.2	0.3	241.2	5.6
														5.8	22.2	0.4	232.2	5.9
														5	22.3	0.2	118.8	6.7
														5.7	22.2	0.5	357.1	8.1
														12.8	22.2	0.6	343.3	9.7
														12.9	22.3	1	338.2	12.9
														10.1	22.6	1.5	327.6	15.1
														6.9	23.4	2.1	1.5	22.4
														7.9	25	3	16.9	17.9
														9.4	26.8	3.2	21.4	19.6
														14.2	28.8	3.3	27.8	25.9
														18.2	31.1	2.8	47.3	30.7
														24.7	32.9	2.8	65.2	35.3
														25	33.5	4.6	102.2	47.2
														17	33.2	5.2	89.5	43.3
														15.9	33.2	4.5	74.1	34.3
														21.2	33.1	4.1	72.2	33.4
														20.6	32.8	3.7	79	37.1
														21.7	31.8	2.8	82	37.2
														18.5	30.9	1.5	105.3	37.3
														21.5	30	0.9	112.8	38.1
														24	28.9	0.6	129.6	40.8
														21.8	28.4	0.6	124	39.9
														22.3	27.6	0.8	212.9	41.1
														21.3	27.9	2.2	154.4	44.1
														37.3	23.1	2.6	154.5	107.2
														49.6	22.4	2.2	175.5	86
														93.8	21.3	2.3	178	250.5
														167.6	20.7	2.3	182.5	119.4
														114.1	20.5	1.8	182.6	42.7
														51.7	19.2	2.3	144.6	26.1
														32.4	18.5	1.8	193.1	28.9
														26.5	18.5	1.5	188.5	31
														25.7	19.4	1.2	173.4	35.2
														18.2	20	1.8	171.5	18.9
														11.4	20.9	2	157.2	21.7
														12.7	21.8	1.7	160.1	33.7
														31	22	2	127.2	76.2
														48.7	22	2	133.5	68.8
														45.4	21.8	2.2	121.1	61.9
														45.8	21.8	2.7	120	61.5
														41.7	21.4	2.5	126.3	50.1
														28.7	21.2	1.9	134.3	44.7
														24.3	20.9	1.2	149.1	48.9
														26.3	20.7	1	143.3	42.2
														29.2	20.4	0.5	189	40.8
														23.1	20.1	1	162.5	47.7
														22	19.7	0.9	162.2	37.4
														21.4	18.5	0.9	180.2	39.9
														19.4	17.7	0.5	229.5	30
														18	18	0.7	213.2	31.8
														32.2	18.4	0.4	194.4	63.9
														48.2	18.6	0.6	187.9	80.2
														51.8	18.7	0.7	241.7	80.9
														54.7	19.1	0.7	250.6	60.7
															23.2	3.2	119.2
															23.6	3.6	115.5
															24.4	3.4	118.6	16.1
															25.3	3.6	98.7	14.4
															25.3	3.5	99.3	16.9
															25.3	4	81	13.6
															24.4	4.2	81.1	16.8
															23.1	3.8	75.2	18.1
															22.2	2.8	77.3	14.1
															21.7	2.5	65	13.8
														-3.6	20.7	0.6	78.4	14.5
														-0.4	19.5	0.5	238.8	13.8
														-1.9	19	0.5	225.3	15.7
														4	18.3	0.4	250.8	12.2
														4.5	17.7	0.4	266.7	11.5
														1.6	17.9	0.2	243.1	11.3
														4.3	17.4	0.2	190.6	11.8
														2.7	17.5	0.5	248.1	14.2
														3.9	17.4	0.1	297.9	17.7
														5.9	19.4	0.5	201.9	22.4
														5.7	22.3	0.5	56.9	25.3
														7.7	23.8	0.8	75.4	24.4
														9.4	24.8	1.3	0	19.8
														4.3	26.3	2.5	91.3	26.6
														5.3	27	3.6	107.5	30
														6.5	27.8	3.7	84.9	27.6
														11.1	28.1	4.5	78.1	29.9
														12.2	27.9	4.9	90.2	22.4
														11.1	27.4	4.8	83	20.2
														8.3	26.6	4.6	91.1	17.6
														7.6	25.8	3.8	80.7	19.2
														7.7	24.3	3.8	102.2	17.6
														7.1	23.3	2.9	103.2	13
														7.1	22.9	2	90.7	12.2
														5.3	22.5	1.3	81	11.6
														7.3	21.2	0.4	146.4	10.4
														6.6	19.7	0.5	231.2	10.3
														4.4	19.2	0.6	251.3	10.1
														3.5	18.5	0.3	244.7	9.2
														3.7	18.1	0.3	223.1	8.3
														5.6	17.5	0.3	223.5	8.8
														5.6	17.1	0.5	258.5	11
														11.9	17	0.4	287	20
														10	18.8	0.7	247	31.2
														7.4	21	0.3	283.6	28.5
														9.6	22.8	0.8	281.9	15.5
														6.1	24.7	0.5	331.9	14.8
														5.8	26.2	1.4	17.2	20.7
														6.2	27.8	1.8	37.9	19.3
														0	29.2	2.2	65.4	23.7
														-2.2	29.5	3.3	71.4	27.4
														4.9	28.4	4.1	78.8	24.7
														3.9	27.5	4.2	69.5	20.2
														4.1	26.8	4.4	81.5	16.4
														6	26.2	3.7	76.2	17.9
														7.6	25.7	3.5	59	17.2
														6.9	25.3	2.7	58.2	15.2
														8.6	24.8	1.5	80.5	13.3
														8.7	24.2	0.7	113.8	13.9
														5.6	23.9	0.7	129.2	12.9
														0.2	23	0.7	126.4	12.6
														6.7	22.8	0.6	128.9	16.7
														8.7	22.3	0.5	185.9	15.1
														4.9	22.3	0.5	198.8	15.3
														6.5	22.4	0.6	155.9	15.6
														11.3	22.5	1.4	257.1	20.5
														9	22.5	2.7	232.9	25.4
														20.6	21.2	0.4	214.3	41.8
														25.4	21.2	0.5	246.9	48.5
														30.6	21.5	1.9	271.1	40.7
														29.6	21.4	1.3	286	33.2
														24.3	21.6	2	256.8	36.4
														27	22.3	1.3	327.7	44.9
														34.2	24.5	1.8	343.6	37.6
														31.9	26.4	2.1	4.1	37.4
														30.5	27.8	2.3	17.4	30.7
														23.4	29.7	2.7	25.1	21.4
														16.9	29.3	1.5	115.8	25.1
														15.2	23.3	2.5	181.5	25.5
														13.3	21.1	0.7	139.6	27.6
														15.6	20.6	1.3	271.7	26.2
														21.5	20.4	2	263.1	27.9
														27.4	20.2	0.7	282.9	27.9
														23.7	19.8	0.8	250.9	25.8
														20.3	19.6	0.6	277.4	26.6
														19.5	19.4	0.5	246.6	29.3
														20.1	19.9	0.9	243.3	38.5
														30.5	21	0.7	240.4	51.7
														34.4	21	0.6	228.6	46.1
														27.5	20.8	1.8	179.4	18.2
														17.4	20.3	1.6	193.6	17.8
														14.1	19	1.6	184.2	13.6
														8.6	18.3	1.2	208.8	10.5
														8.7	18.4	1.9	231.4	11.2
														10	18.3	1.5	220.1	25.9
														23.3	18.8	1.8	226.2	45.2
														35	19.5	1.4	228.3	59.5
														37.1	19.9	1.4	219.8	60.5
														43.2	20.7	1.3	207.6	61.8
														49.9	21.1	1	195.1	65
														45.4	21.4	1.1	182.6	55.9
														43.2	22	1.7	160.8	55.3
														41.8	22.1	1.6	187.5	52.5
														41.6	21.9	0.9	165.3	53.1
														39	21.4	0.9	185.2	51.1
														35.5	21.1	0.9	204.9	52.4
														40.2	20.9	1.1	201.5	49.5
														44	20.8	1.1	202.3	46.1
														36.2	20.5	1.8	224.3	36
														25.6	20.4	1.1	213.6	30.9
														20.9	20.2	0.9	209.7	18.1
														15.6	20.5	1.1	202	17.3
														14.3	20.8	1.5	195	24.4
														15.6	20.7	1.3	199.2	24.3
														15.9	20.2	1.5	214.6	17.9
														15.4	20.9	1.9	205.4	21.1
														15.7	21.2	2	211.8	18
														12.6	21.5	2.6	208.7	16.3
														12	22.1	2.8	199.5	16
														12.9	22.7	2.7	205.5	17.6
														13	23.7	2.7	206.9	19.2
														16.6	22.3	1.8	216.8	30.4
														20.6	22.7	1.5	188.7	26.1
														20.7	23.8	2.4	203.6	24.1
														18.2	23.7	2.1	200.7	21
														12.8	23.5	1.3	183.3	15.7
														10.9	23.2	1.3	187.9	15.8
														13.2	22.3	2.1	218.2	19.7
														10.2	20.9	1.4	235.1	16.6
														13.7	20.5	0.5	283.7	16.2
														18.4	20.3	0.4	340.5	18.2
														16.3	19.6	1	240.7	13.1
														10.9	19.1	0.7	276.2	12.5
														10.9	18.9	0.5	13.9	14.1
														9.8	18.7	0.1	192.6	12.1
														7.4	18.6	0.3	177	11.9
														8.6	18.6	0.6	249.6	13.3
														7.5	18.6	0.8	256.2	14
														8.6	18.7	0.7	247	16.6
														8.8	19.1	1.2	246.2	15.5
														9.6	19.7	1.4	246	13.8
														6.4	20.9	0.8	257.9	12.6
														6.3	22.4	0.7	210.9	13.7
														7	23	1.1	273.2	13.4
														5	23.6	1.6	263.8	12.1
														4.9	22	1.1	155.3	13.2
														4.5	21.6	2.3	230.4	6.5
														4.1	22.8	1.4	224.8	7.6
														6.2	23.8	1.2	158.3	3.7
														6.9	24.5	2.1	130.6	7.5
														6.2	24.3	2	118.2	6.7
														35.9	24.1	1.8	113.3	12.6
														5	23.3	1.8	106.6	10.4
														-0.9	22.7	0.9	132.5	10.5
														2.3	22.5	0.7	229.7	10.4
														0.4	22.4	1.1	246.2	10
														-0.9	22.1	0.3	208.3	6.1
														2.1	21.4	0.2	41.7	7.3
														3	21.1	0.6	267.7	11.1
														4.7	21.1	0.4	270.5	9.6
														5.2	20.7	0.2	137	10.8
														10.3	20	0.6	179.8	13.1
														13.6	19.9	0.6	99.5	17.1
														9.7	21.4	1.8	97.8	15.6
														10.1	22.9	1.5	101.2	18.7
														10.6	23.2	1.8	98.1	23.8
														8.6	26	0.9	65.7	15.7
														7.9	28.1	2.4	76.4	19
														6.8	29.6	4.2	86.2	19.3
														9.9	30.7	4.5	91.9	18.2
														10.4	29.1	4.5	90.4	20.4
														7.5	28.2	2.9	131.7	18.8
														4	27.2	3.1	171.9	13.5
														6.4	21.5	1.5	162.9	18.3
														3.2	23.5	1.9	138	18.3
														8	24.6	1.4	142.3	12.9
														12.1	23.5	0.8	124.5	24.7
														13.8	22.5	1	28	26.4
														15	21.3	0.2	263.8	25.2
														13.2	20.7	0.7	265.7	25.5
														11.4	20.1	0.4	204	25
														13.5	19.2	0.1	166.6	23.3
														12.7	18.6	0.1	228.3	26
														14.6	18.1	0.2	56.7	22.8
														11.8	17.5	0.2	137.6	23.5
														11	17.2	0.3	234.5	30.3
														12.7	17.2	0.2	212.5	37.2
														15.9	19.9	0.2	163.8	52.8
														22.9	23	1.4	263.9	38.5
														21.3	25.2	2.4	241.8	27.8
														15	26.3	3.2	265.8	11.3
														4.5	27.6	3	237.9	3
														-1.9	29.1	2	225.8	5.4
														-4.3	30.5	1.6	226.4	5.4
														-0.3	31.7	0.6	237.5	9
														3.4	30.2	5	95	17.2
														5.5	28.6	5.6	102.6	10.9
														3.3	27.7	5.2	103.6	13.5
														2.5	27	4.2	107.3	16.6
														4.5	25.8	3.1	114.4	16.6
														5.5	24.7	1.9	119.9	19
														5	23.8	1.2	126.3	17
														4.1	22.7	0.5	158.1	13.5
														3.4	21.5	0.2	164.1	13.9
														4.1	20.9	0.4	216.2	12.4
														6.4	20.2	0.3	212.7	10.6
														5.3	19.7	0.4	234.8	10.3
														5.7	19.4	0.7	226.7	11.4
														5.7	19.1	0.8	243.5	15.2
														4.1	18.7	0.3	275.7	12.8
														4.7	18.5	0.4	295.3	21
														11	20.5	0.5	265.1	30.3
														9.7	22.8	0.9	260.8	28.7
														8.6	25.1	1.4	347.3	29.4
														12	27.2	2.2	13	42.7
														8.8	29.3	2.4	36.6	45.7
														11.3	31.6	1.9	25.8	36.1
														15.8	32.9	3	75	47.5
														14.4	33.3	5.5	88.4	40.4
														14.2	32.6	5.8	79.5	53.3
														11.2	32.1	5.9	84.3	41.1
														11	31.5	5.2	78.9	42.2
														11.4	31.2	4.2	71	34.3
														10.2	30.2	3.8	62.6	29.9
														9.5	28.8	3	58.1	39
														9	27.7	1.5	80	43.5
														6.8	25.8	0.4	150.1	37.7
														11.6	24.5	0.3	189.4	36.7
														10.9	23.4	0.3	212.1	33.2
														13.1	22.3	0.6	259	34.5
														13.3	21.4	0.4	229.7	43.3
														15.2	20.4	0.3	278	34.9
														13.3	19.8	0.3	331.5	41.6
														12.6	19.2	0.2	267.3	32.2
														15.6	19.1	0.6	218.7	40.4
														17.7	21.5	1.1	251.8	48.7
														17.4	24.8	1.1	241.7	52.3
														20.1	31.4	3.1	333	63
														17.6	35.6	5.1	332	56.4
														9.9	38.1	7.1	336.9	42.4
														8.8	40	7	325	41.5
														2.9	41.4	7.3	317.1	66.5
														8.4	41.5	6.9	314.6	105.6
														13.3	41.6	6.6	324.4	165.9
														23.7	41.2	6.7	333.1	358.1
														45	40.6	4.7	332.6	475.9
														71	39.4	4.4	269.4	829.6
														99.9	37.3	1.7	217.4	745.6
															35.7	1.4	113.6	549.1
															33.2	1.3	78.4	325.5
															32.2	1.7	21.1	300
														47.8	31.2	4.9	357.5	171.1
														33.9	30.4	4.1	353.9	58.5
														26.1	30	2.1	348.1	64.1
														25.9	29.1	1.8	213.1	99.1
														28.8	27.6	0.8	172.1	104.3
														24.1	26.8	0.9	129.4	99.1
														23.4	25.9	2.5	116.4	135.3
														47.9	24.3	2.8	125.3	148.6
														63.9	24	2.5	129.5	126
														64.1	23.5	1.3	146.1	129.7
														59.7	23.4	1.2	160.8	116.6
														54.4	23.5	1.3	222.8	120.3
														69.9	22.9	1.9	211.7	225.8
														96.4	21.8	1.2	218.9	233.9
														90.7	22.5	0.7	127.5	188.9
														76.8	22.8	2.1	88.6	121.1
														47.7	24.1	3	104.7	54.2
														37.1	26.1	3.3	102.8	80.6
														28.4	26.4	3.8	110.4	64.7
														21.2	25.1	4	109	53.2
														20	24.7	3.6	107.5	49.9
														20.7	24.7	2.6	102.2	48.2
														17.3	24.3	2.4	115.3	48.4
														15.7	22.9	2.3	90.2	49.6
														16.7	23	1.7	87.5	43.5
														19	23.2	1.4	93.5	47.5
														20.8	23.5	1.1	95.7	49
														18.9	23.7	2	98.2	51.6
														16.6	23.5	2.3	103.5	60
														18.2	23.4	1.8	109.8	61.2
														15.4	23.4	1.9	102.6	69.8
														15.6	23.4	1.8	104.9	76.8
														19.5	23.7	1.4	98.3	82.6
														21.7	24.5	1.9	72	92.2
														17.2	25.3	2.2	63.3	98
														18.6	27	1.8	67.7	94.9
														19.2	28.1	1.5	61	101.6
														39.1	29.3	2.3	95.9	107.1
														41.8	29.4	2.8	93.7	102.8
														15.1	29.2	2.8	84.2	76.8
														7.3	29.2	3.9	78.3	71.4
														9.6	28.5	4.3	84.2	47
														7.3	27.9	4.2	75.8	26.8
														4.8	27.6	3.8	89.8	24.4
														7.7	27	3.2	81.7	33.1
														6.9	26.5	2.3	63.4	22.3
														2.2	26.3	1.7	61.3	25.6
														-2.3	25.7	0.6	24.5	19.7
														4.5	25.3	0.3	41.8	20
														7.9	25.2	0.7	99.4	23.2
														7.9	25.1	1.3	74.4	19.2
														6.9	25.2	1.4	61.7	17.3
														7.5	25.2	1	38	21.5
														7.1	24.8	0.9	284.1	24.1
														7.8	24.2	1.1	273.5	21.1
														9.5	24.2	1.2	264.2	24.3
														11.7	25.2	2.1	255.3	31.3
														11.7	27.1	0.6	297.7	29.1
														13.6	28.9	1.6	14.8	30.1
														13.4	31	1.6	340.9	22.9
														12.6	32.7	2	319.8	25.2
														10.2	34.3	1.8	313.5	31.1
														12	36.1	1.7	337.6	35.1
															28.2		115
															26.8		135.8	39.2
															26		149	36
															25.2		170	25.1
															25.2		177.1	32.5
															25.2		173.4	30.7
															25.1		177.9	31.1
														-5.1	24.4		183.7	32.6
														-3.9	24.2		188.8	32.4
														3.7	24.1		179.4	35
														7.9	23.8		185.7	37.5
														14.9	23.5		178.4	44.3
														17.5	23.4		182.9	44.1
														26.8	23.2		174.8	51.6
														31.4	23.4		149.9	56.3
														35.3	23.9		153.2	56.1
														22.5	26.3		124.4	59.9
														22.1	26.7		95.8	43.7
														16	27.7		102.6	36.4
														21.3	28		98.1	41.9
														25.3	27.7		100.3	38.7
														22.8	27.4		101	44.9
														18.9	27.5		117.3	38.4
														21.4	26.6		125.1	30.3
														18.6	25.8		127	24.7
														14.4	25.1		115.5	28
														9.8	24.4		99.8	21.7
														11.6	23.9		118.2	17.7
														10.1	23.1		120.4	13.3
														6.8	22.2		132.1	14.9
														8.9	21.1		165.8	15.8
														8.6	20.5		227.9	16
														10.4	19.7		235.7	15.7
														9.3	19.1		183	14.2
														6.7	18.6		218.8	14.5
														11.6	18.2		237.8	16.3
														12	18.2		290.9	22.5
														9.4	19.7		249.7	26.9
														12.9	21.9		299.7	37.7
															24.1		22.8	26.9
															25.3		3.1
															26.7		358.9
														13.9	28.2		15.8	22.6
														19.9	29.6		23.1	28.1
														21.9	31.5		44.2	31.5
														22	32.1		74.6	43.8
														22.7	31.4		86.2	44.7
														20.7	30		80.6	36.4
														10.4	28.5		81.8	30.7
														9.8	27		77.6	30.4
														11.9	25.9		72.6	31.7
														17.5	25.2		50	26.4
														16.8	24.7		40.9	22.7
														11.2	24.2		40.5	21.4
														10.9	23.4		180.7	19.9
														13.4	23.2		158.5	19.7
														10	22.5		235.9	19.2
														10.4	21.9		187.3	17.8
														12.9	21.9		242.5	19
														4.6	22.6		275.3	22.3
														6.8	23.1		313.1	35.8
														11.3	23.9		335	25
														13.3	24.5		23.2	31.8
														14.1	26.1		359.2	34.3
														16.1	28.1		35.8	35.9
														15.3	30.8		47.4	34.8
														14.1	33.6		38.7	29.6
														8.5	35.8		87.2	44.3
														13.9	36		80.7	56
														20.4	35.5		87.1	51.1
														18.8	35.2		96.2	47.7
														24.9	34.4		92.1	40
														21.1	33.3		78.3	34
														14.6	31.6		85.1	28.4
														9.3	30		89.7	26.9
														6.5	28.7		108.2	31.6
														9.2	27.6		116.2	32.4
														8.4	26.7		120	32.5
														8	26		138.1	30.8
