# Supplementary material for: Black Carbon Emission, Transport and Effect on Radiation Forcing Modelling During the Summer 2019–2020 Wildfires in Southeast Australia
Source: Preprints.org preprint supplement (doi:10.20944/preprints202302.0293.v1), 2023-02-17
Supplement: Supplementary file 5 [file dec2019_500.xlsx]

## Sheet: dec2019_500
Date_time	Datetime (AEST)	dust_1	PM10	PM2.5	BC	NO2	NO	Temp2m	U	V	Temp2m(C)	Wsp(pred)	Wdr(pred)	PM2.5 (obs)	Temperature(obs)	Wsp(obs)	Wdr(obs)	PM10 (obs)	BC(obs) nanograms/m3	Date	PM2.5_avg	PM2.5_avg_obs	BC_avg	BC_avg_obs(nanogras/m3)	BC_avg_obs(micrograms/m3)				PM25_cor	PM25_IOA	PM25(P-O)^2	(P-O)+(O-O)^2	PM25_Obs_avg		PM25(P-O)^2	(P-O)+(O-O)^2	PM25_Obs_avg		Temp(P-O)^2	(P-O)+(O-O)^2	Temp_Obs_avg		Wsp(P-O)^2	(P-O)+(O-O)^2	Wsp_Obs_avg
2019-12-01_00:00:00	2019-12-01 10:00:00	0	0	0	0	0	0	291.43	-3.21	-3.33	18.28	4.62526	43.9489	0.3	19	2.3	52.1	22.3	118	2019-12-01	1.25929	9.00714	0.035	162.429	0.162429				0.0961456	0.576458	60.0293	2710.41	17.5212		0.09	4427.57	18.477		0.5184	53.4361	21.0164		5.40682	7.89192	1.96054
2019-12-01_01:00:00	2019-12-01 11:00:00	0	0.1	0.03	0	0	0	291.24	-4.5	-4.51	18.09	6.37104	44.9365	1.5	19.9	3	57.4	20.4	174	2019-12-02	7.22958	4.84583	0.122917	172.125	0.172125				0.310928	0.797425	5.68226	2525.32			2.1609	4265.4			3.2761	43.56			11.3639	27.6154
2019-12-01_02:00:00	2019-12-01 12:00:00	0	0.87	0.27	0	0	0	291.28	-7.69	-5.46	18.13	9.43121	54.6249	2.1	20.2	3.6	56	23.8	100	2019-12-03	21.9117	6.28333	0.69	125.208	0.125208						244.245	1165.06			3.3489	4156.38			4.2849	39.1876			34.003	79.4809
2019-12-01_03:00:00	2019-12-01 13:00:00	0	2.45	0.95	0.02	0	0	290.63	-8.67	-7.72	17.48	11.6089	48.3174	-1.2	20.6	4.2	43.3	19.4	81	2019-12-04	11.0971	5.8125	0.137917	465.25	0.46525				Temp_cor	Temp_IOA	27.9268	2062.83			4.6225	4501.07			9.7344	42.3801			54.8923	136.725
2019-12-01_04:00:00	2019-12-01 14:00:00	0	3.37	1.39	0.03	0	0	291.13	-7.33	-8.62	17.98	11.3152	40.3762	1.5	20.9	4.3	29	22.5	117	2019-12-05	10.9283	11.1	0.402083	753.583	0.753583				0.651368	0.686836	0.0294694	1624.06			0.0121	4089.6			8.5264	32.6041			49.2128	132.231
2019-12-01_05:00:00	2019-12-01 15:00:00	0	3.97	1.37	0.02	0	0	291.55	-6.22	-7.37	18.4	9.64393	40.1632	4.7	20.8	3.8	27	26.8	175	2019-12-06	10.6483	36.6417	0.338333	1760.71	1.76071						675.653	675.653			11.0889	3692.99			5.76	29.0521			34.1515	87.0102
2019-12-01_06:00:00	2019-12-01 16:00:00	0	5.24	2.07	0.04	0	0	291.92	-6.15	-7.84	18.77	9.96434	38.1121	1.4	20.7	3	49.6	33.5	136	2019-12-07	14.38	24.1417	0.38875	1127.62	1.12763				Wsp_cor	Wsp_IOA	95.2901	566.742			0.4489	4015.76			3.7249	26.2144			48.5021	78.2931
2019-12-01_07:00:00	2019-12-01 17:00:00	0	6.23	2.4	0.05	0	0	292.41	-6.19	-7.18	19.26	9.4799	40.7653	2	20.3	2.1	52.6	34.8	173	2019-12-08	50.87	10.3792	2.30208	304.25	0.30425				0.334266	0.308874	1639.51	1639.51			0.16	3898.75			1.0816	25.3009			54.4629	55.7098
2019-12-01_08:00:00	2019-12-01 18:00:00	0	6.9	2.42	0.03	0	0	292.53	-5.56	-6.93	19.38	8.88473	38.7405	1.4	20.2	2.1	44.5	37.1	167	2019-12-09	35.6887	5.175	1.18708	339	0.339						931.089	931.089			1.0404	3971.52			0.6724	25.1001			46.0326	47.1795
2019-12-01_09:00:00	2019-12-01 19:00:00	0	9.59	5.51	0.22	0	0	292.42	2.46	-1.37	19.27	2.81576	299.114	4.1	20.1	1	28.2	40.2	158	2019-12-10	23.4313	61.1458	0.484583	3096.67	3.09667				BC_cor		1422.39	1422.39			1.9881	3275.27			0.6889	27.2484			3.29698	3.29698
2019-12-01_10:00:00	2019-12-01 20:00:00	0	0.19	0.16	0.01	0	0	290.96	5.44	1.81	17.81	5.73321	251.597	12.1	20.3	2.7	249.8	-6.9	153	2019-12-11	11.1271	10.525	0.0245833	456.583	0.456583				0.238414		0.362504	1654.53			142.564	2978.98			6.2001	41.9904			9.20036	18.6383
2019-12-01_11:00:00	2019-12-01 21:00:00	0	0.71	0.64	0.04	0	0	290.32	10.35	-0.36	17.17	10.3563	271.992	43.3	19.4	5.2	263	38.2	269	2019-12-12	12.715	6.00417	0.00625	287	0.287						45.0353	1901.73			1819.88	1819.88			4.9729	64.3204			26.587	130.88
2019-12-01_12:00:00	2019-12-01 22:00:00	0	0.29	0.27	0.02	0	0	289.84	9.11	0.02	16.69	9.11002	269.874	35.3	18.8	3.6	264.7	32	208	2019-12-13	10.735	4.60833	0.00666667	235.875	0.235875						37.536	2207.56			1227.1	1227.1			4.4521	82.81			30.3603	73.8572
2019-12-01_13:00:00	2019-12-01 23:00:00	0	0.17	0.15	0.01	0	0	289.44	9.3	-0.96	16.29	9.34942	275.894	17.6	18.2	2.9	254.9	15.6	245	2019-12-14	10.8854	10.0583	0.03	402.417	0.402417						0.684067	1712.66			304.503	2409.83			3.6481	102.01			41.595	66.1525
2019-12-01_14:00:00	2019-12-02 00:00:00	0	0.58	0.53	0.03	0	0	289.81	10.1	-2.07	16.66	10.3099	281.582	8.1	17.9	2.5	251.1	13.2	295	2019-12-15	15.1813	13.5708	0.626667	639.375	0.639375						2.59344	1127.34			57.3049	3388.4			1.5376	100.601			60.9952	75.5846
2019-12-01_15:00:00	2019-12-02 01:00:00	0	2.02	1.84	0.11	0	0	290.18	8.44	-2.11	17.03	8.69975	284.036	9.9	17.8	2.2	270.4	14.4	501	2019-12-16	7.17	17.6042	0.0333333	869.625	0.869625						108.872	1410.29			64.9636	3036.01			0.5929	95.2576			42.2468	46.0193
2019-12-01_16:00:00	2019-12-02 02:00:00	0	5.06	4.61	0.26	0	0	289.94	5.93	-1.86	16.79	6.21486	287.415	2.8	17.7	2.6	264.2	10.9	367	2019-12-17	8.37958	4.475	0.0170833	278.875	0.278875						15.2458	2447.62			3.2761	3531.92			0.8281	102.01			13.0672	22.0793
2019-12-01_17:00:00	2019-12-02 03:00:00	0.11	3.86	2.7	0.14	0	0	289.16	7.15	-0.87	16.01	7.20274	276.938	2.7	17.4	2.9	247.3	11.2	334	2019-12-18	10.9979	9.94583	0.245	468.333	0.468333						1.10688	1712.66			0	3774.87			1.9321	124.992			18.5135	35.841
2019-12-01_18:00:00	2019-12-02 04:00:00	0.06	1.07	0.58	0.03	0	0	287.81	7.35	-1.19	14.66	7.44571	279.197	1.5	16.9	2.7	258.6	7.1	331	2019-12-19	37.4158	67.7	1.65417	4175.96	4.17596						917.131	1830.8			0.8464	4193.86			5.0176	169.781			22.5218	36.3574
2019-12-01_19:00:00	2019-12-02 05:00:00	0.06	0.94	0.38	0.01	0	0	287.37	7.65	-1.41	14.22	7.77886	280.443	7.2	16.3	2.1	246.6	3.9	112	2019-12-20	21.7383	11.0292	0.664583	669.5	0.6695						114.686	873.823			46.5124	3511.75			4.3264	197.965			32.2494	33.2105
2019-12-01_20:00:00	2019-12-02 06:00:00	0.09	2.05	1.11	0.05	0	0	287.73	7.93	-2.38	14.58	8.27945	286.706	6.4	15.8	1.3	259.2	3.9	150	2019-12-21	37.555	28.9875	1.09958	579.75	0.57975						73.4021	73.4021			27.9841	3520.05			1.4884	201.924			48.7127	48.7127
2019-12-01_21:00:00	2019-12-02 07:00:00	0.15	4.79	3.17	0.16	0	0	288.8	6.13	-2.68	15.65	6.69024	293.615	4.2	15.9	1.2	276.6	4.2	246	2019-12-22	20.6688	16.7417	0.606667	535.667	0.535667						15.422	620.886			1.0609	3536.68			0.0625	170.042			30.1427	30.1427
2019-12-01_22:00:00	2019-12-02 08:00:00	0.29	8.5	5.59	0.27	0	0	289.73	4.43	-2.64	16.58	5.15699	300.792	4	16.6	2.1	254	9.8	64	2019-12-23	8.4725	13.9333	0.0229167	552.208	0.552208						29.8207	1593.78			2.5281	3277.56			0.0004	130.188			9.34516	9.86579
2019-12-01_23:00:00	2019-12-02 09:00:00	0.32	6.32	1.97	0.03	0	0	290.68	7.79	-0.36	17.53	7.79831	272.646	1	17.3	4	261.6	7.6	43	2019-12-24	9.81917	36.0917	0.0141667	1580.29	1.58029						690.244	690.244			0.9409	4079.38			0.0529	95.2576			14.4272	59.0179
2019-12-02_00:00:00	2019-12-02 10:00:00	0.04	3.68	1.21	0	0	0	291.61	9.11	-0.19	18.46	9.11198	271.195	-1.1	19.1	4.7	266.4	5.7	49	2019-12-25	7.775	19.5917	0	1121.25	1.12125						139.634	1222.29			5.3361	4452.89			0.4096	49.4209			19.4656	94.012
2019-12-02_01:00:00	2019-12-02 11:00:00	0.01	7.09	2.67	0	0	0	291.95	9.99	-0.36	18.8	9.99648	272.064	-0.4	20.4	4.7	270.6	9.4	33	2019-12-26	5.82917	9.25833	0.00208333	511.292	0.511292						11.7592	2231.66			9.4249	4169.28			2.56	29.0521			28.0527	111.947
2019-12-02_02:00:00	2019-12-02 12:00:00	0	19.56	6.76	0	0	0	292.33	10.54	-0.35	19.18	10.5458	271.902	3	20.1	5.1	274.4	12	34	2019-12-27	5.57333	4.50833	0.0133333	546.458	0.546458						1.13423	2729.68			14.1376	3258.13			0.8464	28.1961			29.6568	132.937
2019-12-02_03:00:00	2019-12-02 13:00:00	0	16.75	5.67	0.01	0	0	292.44	11.72	0.65	19.29	11.738	266.826	3.4	20.4	4.7	264.1	14	41	2019-12-28	12.9217	10.2625	0.335833	399.042	0.399042						7.07117	1532.24			5.1529	3337.37			1.2321	24.01			49.5336	151.832
2019-12-02_04:00:00	2019-12-02 14:00:00	0	19.43	6.82	0.01	0	0	292.45	12.47	1.17	19.3	12.5248	264.64	6	20.4	6.1	273	14.1	79	2019-12-29	44.2192	10.9042	1.88125	602.458	0.602458						1109.89	1109.89			0.6724	2918.16			1.21	23.9121			41.2776	210.504
2019-12-02_05:00:00	2019-12-02 15:00:00	0	22.88	8.1	0.01	0	0	292.65	12.48	1.52	19.5	12.5722	263.056	1.5	20.6	5	262	15.3	306	2019-12-30	26.4471	15.2417	0.912917	929.042	0.929042						125.561	425.979			43.56	3276.42			1.21	20.1601			57.3386	181.07
2019-12-02_06:00:00	2019-12-02 16:00:00	0	33.74	11.57	0	0	0	292.39	13.01	1.9	19.24	13.148	261.691	2.2	20	5.4	254.2	20	263	2019-12-31	27.2471	38.9583	1.01792	1582.58	1.58258						137.153	137.153			87.7969	2816.42			0.5776	28.6225			60.0316	208.283
2019-12-02_07:00:00	2019-12-02 17:00:00	0	25.64	8.38	0	0	0	292.3	12.41	3.06	19.15	12.7817	256.149	5.1	19.6	5.6	252.7	21.5	204	2020-01-01	46.8682	26.1455	1.61818	740.091	0.740091						429.431	429.431			10.7584	2847.29			0.2025	34.1056			51.5767	203.51
2019-12-02_08:00:00	2019-12-02 18:00:00	0	19.37	6.99	0	0	0	292.14	11.32	3.81	18.99	11.944	251.398	7.2	19	5.7	270	16.8	124												9115.62	44998.7			0.0441	2772.02			0.0001	43.56			38.9872	183.006
2019-12-02_09:00:00	2019-12-02 19:00:00	0	29.25	10.45	0	0	0	291.56	9.51	3.37	18.41	10.0894	250.487	6.9	18.2	4.5	259.1	16.9	117																12.6025	2449.26			0.0441	63.6804			31.242	109.693
2019-12-02_10:00:00	2019-12-02 20:00:00	0	29.66	10.84	0.03	0	0	291.03	8.31	2.37	17.88	8.64135	254.082	10	17.6	3.7	256.8	17.3	137																0.7056	2116			0.0784	82.9921			24.417	67.6564
2019-12-02_11:00:00	2019-12-02 21:00:00	0	39.58	15.37	0.17	0	0	290.47	7.57	1.49	17.32	7.71524	258.865	10.9	17.3	3.5	258.2	14.7	151																19.9809	1645.92			0.0004	99.4009			17.7683	50.3993
2019-12-02_12:00:00	2019-12-02 22:00:00	0	53.23	24.91	0.63	0	0	289.78	6.97	-0.05	16.63	6.97018	270.411	6.5	16.9	2.8	254.7	13.5																	338.928	1255.28			0.0729	122.324			17.3904	31.9697
2019-12-02_13:00:00	2019-12-02 23:00:00	0	59.78	31.29	1	0	0	289.18	6.37	-1.43	16.03	6.52854	282.653	7.3	16.8	2.1	247.2	11.2	150																575.52	798.063			0.5929	138.298			19.6119	20.363
2019-12-02_14:00:00	2019-12-03 00:00:00	0	55.63	27.49	0.78	0	0	288.56	6.87	-1.12	15.41	6.9607	279.259	3.7	16.5	1.7	240.2	9.6	171																565.964	1270.92			1.1881	160.782			27.6749	27.6749
2019-12-02_15:00:00	2019-12-03 01:00:00	0	51.91	21.11	0.33	0	0	288.08	7.03	0.49	14.93	7.04706	266.013	5.7	16	1.1	272	10.5	122																237.468	1602.4			1.1449	186.596			35.3675	35.3675
2019-12-02_16:00:00	2019-12-03 02:00:00	0	49.99	18.15	0.13	0	0	287.76	5.97	0.97	14.61	6.04829	260.771	3.3	15.9	0.8	277.8	9.5	116																220.522	2060.25			1.6641	198.246			27.5445	27.5445
2019-12-02_17:00:00	2019-12-03 03:00:00	0	48.48	16.62	0.04	0	0	287.7	3.73	2.5	14.55	4.49031	236.168	2.8	15.2	1	282.1	9.7	156																190.992	2248.66			0.4225	220.226			12.1823	12.1823
2019-12-02_18:00:00	2019-12-03 04:00:00	0	41.86	14.37	0.01	0	0	287.9	0.95	3.7	14.75	3.82001	194.4	4.8	14.9	0.4	306.8	12.2	92																91.5849	2272.43			0.0225	223.204			11.6965	11.6965
2019-12-02_19:00:00	2019-12-03 05:00:00	0	38.87	13.6	0.01	0	0	287.94	1.05	1.59	14.79	1.90541	213.44	9.6	14.1	0.4	231.4	12.6	75																16	1904.45			0.4761	246.49			2.26627	3.27822
2019-12-02_20:00:00	2019-12-03 06:00:00	0	37.32	13.47	0.04	0	0	288.07	1.24	-1.34	14.92	1.82571	317.22	9.6	15.8	1.3	261.7	12.1	65																14.9769	1915.81			0.7744	192.377			0.276366	0.980684
2019-12-02_21:00:00	2019-12-03 07:00:00	0	36.78	13.54	0.04	0	0	288.6	3.08	-1.82	15.45	3.57754	300.579	-1.4	16.6	2.4	260.8	13.8	58																223.204	2992.09			1.3225	157.252			1.3866	3.46534
2019-12-02_22:00:00	2019-12-03 08:00:00	0	33.44	12.25	0	0	0	290.27	5	-0.26	17.12	5.00676	272.977	4.8	18.2	2.8	257.5	11.4	40																55.5025	2479.04			1.1664	85.9329			4.86977	13.6217
2019-12-02_23:00:00	2019-12-03 09:00:00	0	29	11.04	0	0	0	291.92	5.87	0.12	18.77	5.87123	268.829		20	3.8	266.5	13	36																121.882	3113.64			1.5129	33.8724			4.28998	30.8605
2019-12-03_00:00:00	2019-12-03 10:00:00	0	24.79	9.58	0	0	0	293.6	6.38	-0.1	20.45	6.38078	270.898		21.9	3.6	266.5		54																91.7764	3278.71			2.1025	5.0176			7.73276	34.3957
2019-12-03_01:00:00	2019-12-03 11:00:00	0	22.24	8.53	0	0	0	294.8	6.4	-0.13	21.65	6.40132	271.164		23.5	4	270.1		46																72.7609	3400.06			3.4225	3.4225			5.76634	39.5052
2019-12-03_02:00:00	2019-12-03 12:00:00	0	19.63	7.56	0	0	0	295.45	5.43	0.21	22.3	5.43406	267.785		24.9	3.4	273.6	4.5	117																57.1536	3514.12			6.76	6.8121			4.1374	22.2601
2019-12-03_03:00:00	2019-12-03 13:00:00	0	17.37	6.85	0.01	0	0	295.68	4.56	0.33	22.53	4.57193	265.861	2.6	26.4	4.2	270.2	10.5	128																18.0625	3293.61			14.9769	18.8356			0.138328	21.6776
2019-12-03_04:00:00	2019-12-03 14:00:00	0	16.11	6.19	0.01	0	0	296.03	4.75	0.13	22.88	4.75178	268.432	5.7	27.1	1.1	260.4	9.5	234																0.2401	3019.5			17.8084	29.0521			13.3355	13.3355
2019-12-03_05:00:00	2019-12-03 15:00:00	0	15.05	5.85	0.02	0	0	296.49	5.65	-0.08	23.34	5.65057	270.811	6.8	25.7	0.9	60.4	12.3	181																0.9025	2936.56			5.5696	19.8025			22.5679	22.5679
2019-12-03_06:00:00	2019-12-03 16:00:00	0	13.6	6.07	0.03	0	0	296.65	6.34	-0.18	23.5	6.34255	271.626		23	2.5	54.8	73.5	236																36.8449	3692.99			0.25	3.6481			14.7652	22.3403
2019-12-03_07:00:00	2019-12-03 17:00:00	0	15.74	7.21	0.02	0	0	296.55	6.31	-0.14	23.4	6.31155	271.271	30.1	27	4.8	277.1	27.9	204																523.952	872.021			12.96	33.7561			2.28479	48.9378
2019-12-03_08:00:00	2019-12-03 18:00:00	0	15.46	7.08	0	0	0	295.96	4.4	-0.21	22.81	4.40501	272.733	25.4	27.2	3.3	265	15.3	157																335.622	1180.61			19.2721	29.3764			1.22104	12.881
2019-12-03_09:00:00	2019-12-03 19:00:00	0	19.24	10.96	0.26	0	0	295.28	2.3	-1.06	22.13	2.53251	294.744	18.4	25.6	3.1	250.1	15.4	151																55.3536	1404.75			12.0409	12.0409			0.322046	2.2998
2019-12-03_10:00:00	2019-12-03 20:00:00	0	62.17	50.31	2.58	0.01	0	294.86	3.42	-2.24	21.71	4.08828	303.224	6.7	24.2	2.7	248.7	14.1	107																1901.83	1901.83			6.2001	6.2001			1.92731	7.14106
2019-12-03_11:00:00	2019-12-03 21:00:00	0	105.74	88.9	4.74	0.01	0	293.71	4.68	-2.31	20.56	5.21905	296.27	3.5	22.8	3.9	245.1	18.9	124																7293.16	7293.16			5.0176	5.0176			1.7399	25.0305
2019-12-03_12:00:00	2019-12-03 22:00:00	0	114.56	95.04	4.96	0.01	0	292.96	4.68	-3.48	19.81	5.83205	306.634	6.1	21.8	3	250.3	14.7	104																7910.32	7910.32			3.9601	8.8804			8.0205	22.2411
2019-12-03_13:00:00	2019-12-03 23:00:00	0	70.63	54.11	2.55	0.01	0	292.69	4.62	-3.82	19.54	5.99473	309.585	2.6	21.4	2.4	236.4	13.1	231																2653.28	2653.28			3.4596	13.3225			12.9221	18.3075
2019-12-03_14:00:00	2019-12-04 00:00:00	0	38.56	24.42	0.84	0	0	292.68	4.67	-2.92	19.53	5.50775	302.016	4.8	21.4	2.8	250.8	14.2	223																384.944	1415.26			3.4969	13.3956			7.33191	17.5708
2019-12-03_15:00:00	2019-12-04 01:00:00	0	31.05	17.35	0.43	0	0	292.66	4.01	-1.57	19.51	4.30639	291.381	6.7	21	3.1	249.5	15.5	1870																113.423	1830.98			2.2201	16.6464			1.45538	10.8267
2019-12-03_16:00:00	2019-12-04 02:00:00	0	27.36	13.92	0.24	0	0	292.67	3.24	0.14	19.52	3.24302	267.526	4.4	20.5	3.2	273.8	13.8	162																90.6304	2354.19			0.9604	20.8849			0.001851	5.41504
2019-12-03_17:00:00	2019-12-04 03:00:00	0	25.8	12.27	0.14	0	0	292.17	4.12	1.77	19.02	4.48412	246.751	4.5	18.6	0.5	290.4	11.2	123																60.3729	2507			0.1764	48.5809			15.8732	15.8732
2019-12-03_18:00:00	2019-12-04 04:00:00	0	24.81	10.84	0.06	0	0	291.16	5.88	3.82	18.01	7.0119	236.99	5.9	15.9	0.2	14.2	12.7	95																24.4036	2510.01			4.4521	114.062			46.402	46.402
2019-12-03_19:00:00	2019-12-04 05:00:00	0	26.64	11.51	0.06	0	0	290.53	6.26	5.37	17.38	8.2477	229.376	2.2	15.1	0.2	287.6	16.5	108																86.6761	2822.8			5.1984	146.652			64.7654	64.7654
2019-12-03_20:00:00	2019-12-04 06:00:00	0	24.24	10.4	0.01	0	0	290.38	5.2	4.82	17.23	7.0903	227.172	0.4	16.8	0.3	323.6	18.7	72																100	3140.48			0.1849	111.514			46.1082	46.1082
2019-12-03_21:00:00	2019-12-04 07:00:00	0	17.21	7.84	0	0	0	290.99	4.59	4.04	17.84	6.11471	228.647	-1.1	21.2	2.3	275.9	19.3	63																79.9236	3612.01			11.2896	30.8025			14.552	18.4789
2019-12-03_22:00:00	2019-12-04 08:00:00	0	13.91	6.43	0	0	0	292.11	3.66	3.37	18.96	4.97519	227.362	0.4	22.9	3	252.8	16.5	54																36.3609	3601.2			15.5236	15.5236			3.90137	14.8933
2019-12-03_23:00:00	2019-12-04 09:00:00	0	13.12	6.02	0	0	0	293.2	2.4	3.2	20.05	4	216.87	0.1	24.7	3.7	255.2	13.3	56																35.0464	3686.92			21.6225	21.6225			0.09	12.8451
2019-12-04_00:00:00	2019-12-04 10:00:00	0	13.81	6.23	0	0	0	294.03	0.61	2.51	20.88	2.58306	193.66	2.8	26.4	4.6	267.8	13.8	63																11.7649	3342			30.4704	30.4704			4.06805	9.40686
2019-12-04_01:00:00	2019-12-04 11:00:00	0	14.85	6.66	0	0	0	293.97	-2.03	0.03	20.82	2.03022	90.8465	4.7	27.6	4.8	273.5	15.4	98																3.8416	3078.03			45.9684	45.9684			7.67167	7.67167
2019-12-04_02:00:00	2019-12-04 12:00:00	0	16.36	7.39	0.01	0	0	293.23	-3.44	-2.83	20.08	4.45449	50.5569	10.4	29	3.7	257	13.6	149																9.0601	2405.9			79.5664	79.5664			0.569258	16.3094
2019-12-04_03:00:00	2019-12-04 13:00:00	0	16.42	7.43	0.01	0	0	293.32	-3.11	-2.61	20.17	4.06007	49.9958		27.3	0.9	121.3	23.8	634																55.2049	3529.55			50.8369	50.8369			9.98607	9.98607
2019-12-04_04:00:00	2019-12-04 14:00:00	0	16.66	7.56	0.02	0	0	293.38	-3.72	-2.47	20.23	4.46534	56.4168		23.9	2.7	82.6	73.9	1474																57.1536	3514.12			13.4689	13.4689			3.11644	9.2985
2019-12-04_05:00:00	2019-12-04 15:00:00	0	17.37	8	0.04	0	0	293.47	-3.84	-2.6	20.32	4.63741	55.8988		22.8	3.2	107.2	54.1	2384																64	3462.15			6.1504	6.1504			2.06616	13.8489
2019-12-04_06:00:00	2019-12-04 16:00:00	0	18.28	8.53	0.07	0	0	293.73	-3.92	-2.81	20.58	4.82312	54.3658	3.4	21.7	2.8	94.3	34	391																26.3169	3015.11			1.2544	5.3361			4.09302	12.2999
2019-12-04_07:00:00	2019-12-04 17:00:00	0	22.85	10.57	0.1	0	0	293.68	-4.5	-2.98	20.53	5.39726	56.4867	7.5	21.3	2	76.2	38	175																9.4249	2378.51			0.5929	7.6176			11.5414	11.5414
2019-12-04_08:00:00	2019-12-04 18:00:00	0	34.64	15.69	0.17	0	0	293.58	-5.24	-3.74	20.43	6.43779	54.4831	10.1	20.7	1.8	82.6	38.3	151																31.2481	1685.1			0.0729	11.9716			21.5091	21.5091
2019-12-04_09:00:00	2019-12-04 19:00:00	0	37.66	17.89	0.25	0	0	293.79	-4.16	-4.19	20.64	5.90438	44.7943	17.3	20	1.2	66.2	38.2	154																0.3481	1001.72			0.4096	15.6025			22.1312	22.1312
2019-12-04_10:00:00	2019-12-04 20:00:00	0	33.39	16.63	0.27	0	0	294.29	-0.1	-2.85	21.14	2.85175	2.00963	15.6	19.7	0.9	52.2	40	154																1.0609	1197.85			2.0736	14.0625			3.80934	3.80934
2019-12-04_11:00:00	2019-12-04 21:00:00	0	26.86	14.93	0.35	0	0	294.17	5.25	-0.04	21.02	5.25015	270.437	11.4	19.3	0.4	347.2	41.9	113																12.4609	1641.06			2.9584	18.2329			23.524	23.524
2019-12-04_12:00:00	2019-12-04 22:00:00	0	18.12	9.47	0.15	0	0	293.74	5.56	1.04	20.59	5.65643	259.405	15.3	18.3	0.5	253.3	30.9	602																33.9889	1769.88			5.2441	32.49			26.5888	26.5888
2019-12-04_13:00:00	2019-12-04 23:00:00	0	16.99	8.35	0.09	0	0	292.94	5.55	-0.46	19.79	5.56903	274.738	12.7	17.4	0.6	259.3	27.1	1798																18.9225	2096.72			5.7121	54.76			24.6913	24.6913
2019-12-04_14:00:00	2019-12-05 00:00:00	0	17.73	7.83	0.03	0	0	292.65	5.33	-0.96	19.5	5.41576	280.21	14.6	16.1	0.4	274.1	22.5	987																45.8329	1972.25			11.56	80.8201			25.1579	25.1579
2019-12-04_15:00:00	2019-12-05 01:00:00	0	18.61	8.2	0.03	0	0	292.65	4.82	-1.52	19.5	5.05399	287.503	16.6	15	0.3	276.5	20.2	386																70.56	1767.36			20.25	101.808			22.6004	22.6004
2019-12-04_16:00:00	2019-12-05 02:00:00	0	17.06	7.94	0.05	0	0	292.5	4.29	-1.85	19.35	4.67189	293.327	17.6	14	0.2	274.8	18.3	396																93.3156	1705.69			28.6225	126.338			19.9978	19.9978
2019-12-04_17:00:00	2019-12-05 03:00:00	0	14.99	7.22	0.06	0	0	292.41	4.15	-1.32	19.26	4.35487	287.644	20.5	13.8	0.2	11.8	17.8	367																176.358	1530.37			29.8116	132.941			17.263	17.263
2019-12-04_18:00:00	2019-12-05 04:00:00	0	14.29	6.63	0.04	0	0	292.56	4.04	-0.6	19.41	4.08431	278.448	31	14.3	0	205.9	16.8	357																593.897	853.224			26.1121	118.374			16.6816	16.6816
2019-12-04_19:00:00	2019-12-05 05:00:00	0	15.44	6.72	0.02	0	0	292.99	4.1	0.29	19.84	4.11024	265.954	31.4	15.2	0	58	12.2	432																609.102	824.838			21.5296	91.2025			16.8941	16.8941
2019-12-04_20:00:00	2019-12-05 06:00:00	0	17.54	7.41	0.01	0	0	294.16	3.02	1.34	21.01	3.30394	246.073	11.2	20.4	1.9	234.4	10.7	817																14.3641	2326.13			0.3721	10.1124			1.97104	1.97104
2019-12-04_21:00:00	2019-12-05 07:00:00	0	17.92	7.79	0.03	0	0	294.2	-0.85	0.71	21.05	1.10752	129.872		23	2.9	250.1	19	961																60.6841	3486.9			3.8025	3.8025			3.21299	3.21299
2019-12-04_22:00:00	2019-12-05 08:00:00	0	18.42	8.77	0.1	0	0	294.49	-0.64	-1.7	21.34	1.81648	20.63		25.6	1.3	245.7	11.9	570																76.9129	3372.12			18.1476	18.1476			0.266752	0.99904
2019-12-04_23:00:00	2019-12-05 09:00:00	0	15.48	7.43	0.08	0	0	294.65	-0.1	-1.58	21.5	1.58316	3.62156	0.2	28	2.9	260.1	16.8	741																52.2729	3505.82			42.25	42.25			1.73406	1.73406
2019-12-05_00:00:00	2019-12-05 10:00:00	0	11.49	5.69	0.06	0	0	295.47	0.07	-1.85	22.32	1.85132	357.833	6.1	30	3.1	256.9	16.9	875																0.1681	3030.5			58.9824	59.7529			1.55919	1.55919
2019-12-05_01:00:00	2019-12-05 11:00:00	0	9.29	4.95	0.09	0	0	296.29	0.57	-1.9	23.14	1.98366	343.301	10.4	31.1	4.1	278.1	11.7	728																29.7025	2651.22			63.3616	93.1225			4.4789	4.4789
2019-12-05_02:00:00	2019-12-05 12:00:00	0	9.77	5.51	0.14	0	0	296.83	1.33	-1.8	23.68	2.23806	323.54	8.6	31.9	6.3	269.8	17.1	4267																9.5481	2780.45			67.5684	120.78			16.4994	19.5546
2019-12-05_03:00:00	2019-12-05 13:00:00	0	10.15	5.63	0.14	0	0	296.94	1.7	-1.83	23.79	2.49778	317.109	19.7	32.4	6.1	279.1	20.5	3284																197.965	1723.08			74.1321	134.56			12.976	20.0863
2019-12-05_04:00:00	2019-12-05 14:00:00	0	7.13	4.1	0.11	0	0	297.6	3.66	-1.43	24.45	3.92944	291.341	18.5	33.1	5.1	272.9	20.2	1199																207.36	1957.18			74.8225	167.962			1.37021	24.1419
2019-12-05_05:00:00	2019-12-05 15:00:00	0.01	2.83	1.5	0.01	0	0	298.18	5.2	-0.55	25.03	5.22901	276.038	5.9	33.4	5.1	269.6	26	332																19.36	3533.11			70.0569	191.546			0.0166425	38.6014
2019-12-05_06:00:00	2019-12-05 16:00:00	0.02	2.2	1.19	0.01	0	0	298.46	5.84	-0.6	25.31	5.87074	275.866	-2	33.8	5.3	265.5	29.5	182																10.1761	4576.52			72.0801	210.83			0.325745	49.7694
2019-12-05_07:00:00	2019-12-05 17:00:00	0.05	2.4	1.29	0.01	0	0	298.35	5.58	-0.78	25.2	5.63425	277.958	2.9	34.2	5.1	260.3	40.6	241																2.5921	3925.02			81	219.336			0.285426	43.8013
2019-12-05_08:00:00	2019-12-05 18:00:00	0.07	2.39	1.25	0	0	0	297.88	4.15	-1.09	24.73	4.29076	284.716	5.1	33.4	5.1	261.2	50.3	193																14.8225	3659.04			75.1689	183.332			0.654873	27.8231
2019-12-05_09:00:00	2019-12-05 19:00:00	0.08	2.98	1.78	0.04	0	0	297.43	4.84	-2.11	24.28	5.27993	293.555	9.3	32.1	3.8	266.9	56.3	134																56.5504	3109.18			61.1524	139.004			2.1902	24.6406
2019-12-05_10:00:00	2019-12-05 20:00:00	0.07	4.06	2.87	0.11	0	0	297.2	6.13	-1.55	24.05	6.32293	284.19	13	30.5	2.4	256.1	52.5	150																102.617	2597.94			41.6025	99.2016			15.3894	21.2238
2019-12-05_11:00:00	2019-12-05 21:00:00	0.07	43.1	38.49	2.19	0	0	296.39	6.26	-0.8	23.24	6.31091	277.283		21.1	2.9	151.2	75.3	134																1481.48	1481.48			4.5796	4.5796			11.6343	25.9581
2019-12-05_12:00:00	2019-12-05 22:00:00	0.07	90.8	81.95	4.66	0.01	0	295.68	6.63	-0.64	22.53	6.66082	275.514	3.4	19.6	1.8	176	73.3	163																6170.1	6170.1			8.5849	8.5849			23.6276	23.6276
2019-12-05_13:00:00	2019-12-05 23:00:00	0.06	34.28	30.14	1.63	0	0	295.11	5.23	1.26	21.96	5.37964	256.455	22.4	19	1.3	189.9	86	190																59.9076	204.49			8.7616	13.1769			16.6434	16.6434
2019-12-05_14:00:00	2019-12-06 00:00:00	0.04	34.17	27.09	1.31	0	0	294.35	3.1	3.09	21.2	4.377	225.093	46.9	18.8	1.3	175.3	102.3	191																392.436	392.436			5.76	21.0681			9.46791	9.46791
2019-12-05_15:00:00	2019-12-06 01:00:00	0.03	40.52	28.63	1.19	0	0	293.57	1.97	4.05	20.42	4.50371	205.939	61.7	18.5	1.2	172.3	103.1	175																1093.62	1093.62			3.6864	32.1489			10.9145	10.9145
2019-12-05_16:00:00	2019-12-06 02:00:00	0.02	42.84	27.55	0.99	0	0	292.94	1.34	4.87	19.79	5.05099	195.384	71.2	18.4	0.7	150.8	94.6	182																1905.32	1905.32			1.9321	40.96			18.9311	18.9311
2019-12-05_17:00:00	2019-12-06 03:00:00	0.02	43.12	26.38	0.85	0	0	292.36	1.1	4.94	19.21	5.06099	192.553	62.5	18.2	0.4	135.3	95.4	170																1304.65	1304.65			1.0201	51.5524			21.7248	21.7248
2019-12-05_18:00:00	2019-12-06 04:00:00	0.02	38.66	23.33	0.72	0	0	292.2	1.36	3.95	19.05	4.17757	198.999	66.2	17.7	0.1	16.5	86.1	194																1837.84	1837.84			1.8225	61.4656			16.6266	16.6266
2019-12-05_19:00:00	2019-12-06 05:00:00	0.02	29.94	18.29	0.56	0	0	292.41	1.64	2.19	19.26	2.736	216.828	56.2	16.7	0.2	300.7	43.9	198																1437.17	1437.17			6.5536	74.4769			6.4313	6.4313
2019-12-05_20:00:00	2019-12-06 06:00:00	0.02	21.22	13.25	0.42	0	0	292.98	0.66	0.29	19.83	0.720902	246.28	45.8	17.4	0.7	4.3	68.1	1666																1059.5	1059.5			5.9049	54.1696			0.000436902	7.26355
2019-12-05_21:00:00	2019-12-06 07:00:00	0.02	24.02	14.84	0.44	0	0	293.19	-1.51	-1.6	20.04	2.20002	43.3425	42.5	19.1	1.5	26.2	56.3	2113																765.076	765.076			0.8836	29.7025			0.490032	0.490032
2019-12-05_22:00:00	2019-12-06 08:00:00	0.02	26.81	18.1	0.63	0	0	293.56	-2.31	-3.42	20.41	4.12704	34.0367	39.5	20.1	1.9	48	61.9	2456																457.96	457.96			0.0961	16.6464			4.95973	4.95973
2019-12-05_23:00:00	2019-12-06 09:00:00	0.02	28.1	22.26	1.01	0	0	294.51	-0.78	-2.4	21.36	2.52357	18.0043	35.1	21.1	1.8	63.1	58.8	3408																164.866	164.866			0.0676	4.5369			0.523552	0.523552
2019-12-06_00:00:00	2019-12-06 10:00:00	0	0	0	0	0	0	293.5	-4.05	-2.27	20.35	4.64278	60.7298	23.9	20.7	2.5	48.9	48.2	3466																571.21	1843.84			0.1225	12.5316			4.5915	9.16139
2019-12-06_01:00:00	2019-12-06 11:00:00	0	0.79	0.11	0	0	0	292.41	-5.82	-1.31	19.26	5.96561	77.3151	18.2	21.4	1.9	57.2	54.2	3023																327.248	2355.16			4.5796	15.4449			16.5292	16.5292
2019-12-06_02:00:00	2019-12-06 12:00:00	0	1.78	0.4	0	0	0	292.62	-7.01	-2.66	19.47	7.49771	69.2205	13.3	23	2.1	73.9	61.6	3346																166.41	2823.86			12.4609	12.4609			29.1353	30.0492
2019-12-06_03:00:00	2019-12-06 13:00:00	0	3.17	0.84	0	0	0	292.74	-7.23	-2.8	19.59	7.75325	68.83	17.1	23.8	2.1	68	49.1	3044																264.388	2391.21			17.7241	17.7241			31.9592	32.916
2019-12-06_04:00:00	2019-12-06 14:00:00	0	5.17	1.44	0	0	0	292.82	-7.5	-3.24	19.67	8.16992	66.6358	24.6	24.7	2.9	83.4	64.1	1898																536.386	1664.64			25.3009	25.3009			27.7721	48.357
2019-12-06_05:00:00	2019-12-06 15:00:00	0	7.22	2.06	0	0	0	293.05	-7.31	-3.02	19.9	7.90927	67.553	36.8	23.8	2.2	98.1	78.7	3809																1206.87	1206.87			15.21	15.21			32.5957	35.9192
2019-12-06_06:00:00	2019-12-06 16:00:00	0	8.51	2.44	0	0	0	293.21	-6.8	-3.02	20.06	7.44046	66.0533	34.7	23	2	89.1	68.4	1900																1040.71	1040.71			8.6436	8.6436			29.5986	29.5986
2019-12-06_07:00:00	2019-12-06 17:00:00	0	9.68	2.8	0	0	0	293.34	-6.22	-3.73	20.19	7.25268	59.0499	36.3	21.9	2.5	146.1	61	1738																1122.25	1122.25			2.9241	6.25			22.5879	31.7721
2019-12-06_08:00:00	2019-12-06 18:00:00	0	11.24	3.25	0	0	0	293.62	-5.14	-4.02	20.47	6.52534	51.9711	40.4	21.4	3.3	161.5	52	1497																1380.12	1380.12			0.8649	7.3984			10.4028	32.5965
2019-12-06_09:00:00	2019-12-06 19:00:00	0	13.17	3.84	0	0	0	293.71	-4.54	-3.76	20.56	5.89485	50.3688	32.9	20.4	2.5	146.6	28	1032																844.484	906.01			0.0256	13.1769			11.525	18.3085
2019-12-06_10:00:00	2019-12-06 20:00:00	0	14.47	4.21	0	0	0.01	293.8	-4.04	-3.75	20.65	5.51218	47.1321	20.7	19.6	2.6	148.3	35.6	1957																271.92	1758.12			1.1025	18.8356			8.48078	15.9694
2019-12-06_11:00:00	2019-12-06 21:00:00	0	16.04	4.56	0	0	0.01	293.83	-3.29	-3.35	20.68	4.69538	44.4824	17.7	19.2	1.9	141.9	39.3	1556																172.66	1987.38			2.1904	22.1841			7.81415	7.81415
2019-12-06_12:00:00	2019-12-06 22:00:00	0	17.14	4.8	0	0	0.01	293.75	-2.66	-2.57	20.6	3.69872	45.986	18.2	19.2	1.6	136.4	40.6	1356																179.56	1921.95			1.96	22.9441			4.40461	4.40461
2019-12-06_13:00:00	2019-12-06 23:00:00	0	18.11	5.09	0	0	0.01	293.7	-2.53	-2.79	20.55	3.7663	42.2022	17	19.3	1.2	137.9	41.5	1882																141.848	2002.56			1.5625	22.4676			6.58588	6.58588
2019-12-06_14:00:00	2019-12-07 00:00:00	0	18.56	5.25	0	0	0.01	293.63	-2.19	-3.32	20.48	3.97725	33.4105	13.5	19.2	0.9	122.7	39.3	2469																68.0625	2312.65			1.6384	24.1081			9.46945	9.46945
2019-12-06_15:00:00	2019-12-07 01:00:00	0	18.82	5.33	0	0	0.01	293.53	-2.13	-3.7	20.38	4.2693	29.9281	15.3	19.1	0.6	90.8	39.2	2369																99.4009	2135.36			1.6384	26.1121			13.4637	13.4637
2019-12-06_16:00:00	2019-12-07 02:00:00	0	19.08	5.37	0	0	0.01	293.44	-1.63	-4.13	20.29	4.44002	21.5379	13.7	18.8	0.6	250.1	37.5	1762																69.3889	2281.97			2.2201	30.25			14.7458	14.7458
2019-12-06_17:00:00	2019-12-07 03:00:01	0	18.78	5.29	0.01	0	0.02	293.2	-0.74	-4.53	20.05	4.59004	9.27771	15.2	18	0.2	305.6	32.8	1325																98.2081	2148.32			4.2025	42.7716			19.2725	19.2725
2019-12-06_18:00:00	2019-12-07 04:00:01	0	19	5.34	0.02	0.01	0.02	292.79	0.76	-4.57	19.64	4.63276	350.558	14.2	17.1	0.3	236.9	25.7	269																78.4996	2237.29			6.4516	61.6225			18.7728	18.7728
2019-12-06_19:00:00	2019-12-07 05:00:01	0	20.04	6.27	0.1	0.01	0.03	291.99	2.51	-4.01	18.84	4.73077	327.956	16	16.2	0.5	244.4	20.9	346																94.6729	1986.48			6.9696	91.2025			17.8994	17.8994
2019-12-06_20:00:00	2019-12-07 06:00:01	0	20.43	8.2	0.24	0.01	0.03	292.53	2.54	-4.28	19.38	4.97695	329.313	17.2	16.6	0.2	294.9	24.8	318																81	1717.27			7.7284	74.1321			22.8192	22.8192
2019-12-06_21:00:00	2019-12-07 07:00:01	0	21.59	10.76	0.39	0.01	0.02	293.49	1.61	-4.89	20.34	5.14822	341.776	33.4	19.3	1.6	356	112.3	381																512.57	514.382			1.0816	24.5025			12.5899	12.5899
2019-12-06_22:00:00	2019-12-07 08:00:01	0	25.15	15.62	0.64	0.01	0.02	294.11	-0.11	-4.28	20.96	4.28141	1.47231	91.9	20.9	1.5	75.4	136.2	312																5818.64	5818.64			0.0036	7.4529			7.73626	7.73626
2019-12-06_23:00:00	2019-12-07 09:00:01	0	27	16.29	0.64	0.01	0.02	294.03	-3.01	-3.48	20.88	4.60114	40.858	93.3	21	2.5	70.8	83.9	417																5930.54	5930.54			0.0144	7.3441			4.41479	8.91107
2019-12-07_00:00:00	2019-12-07 10:00:01	0	22.95	11.54	0.36	0.01	0.02	293.28	-5.19	-3.97	20.13	6.53429	52.5866	49.2	21.7	2.5	60.5	53.4	438																1418.28	1418.28			2.4649	7.6176			16.2755	24.1896
2019-12-07_01:00:00	2019-12-07 11:00:01	0	28.11	18.69	0.72	0	0.01	293.19	-5.73	-5.24	20.04	7.7647	47.5577	23.8	22.2	2.5	60.6	41.3	342																26.1121	592.923			4.6656	5.5225			27.717	37.8065
2019-12-07_02:00:00	2019-12-07 12:00:01	0	33.22	23.1	0.91	0	0.01	293.32	-6.43	-6.26	20.17	8.97399	45.7676	18.9	22.2	2.6	66.3	33.8	574																17.64	617.026			4.1209	4.9284			40.6278	55.6216
2019-12-07_03:00:00	2019-12-07 13:00:01	0	32.65	20.48	0.72	0	0.01	293.33	-6.76	-6.55	20.18	9.41276	45.904	14.1	22.5	2.7	63	36.3	550																40.7044	1040.71			5.3824	5.3824			45.0612	63.9482
2019-12-07_04:00:00	2019-12-07 14:00:01	0	33.49	18.59	0.55	0	0.01	293.57	-6.49	-6.7	20.42	9.32792	44.088	15.3	22.6	2.6	60.1	35.6	627																10.8241	1085.7			4.7524	4.7524			45.2649	61.0261
2019-12-07_05:00:00	2019-12-07 15:00:01	0	36.11	19.14	0.52	0	0.01	293.99	-6.37	-7.27	20.84	9.66591	41.2251	14.3	22.5	2.6	65.5	35.7	1108																23.4256	1115.56			2.7556	2.7556			49.9271	66.421
2019-12-07_06:00:00	2019-12-07 16:00:01	0	38.05	19.72	0.51	0	0.01	294.23	-6.06	-7.45	21.08	9.60344	39.1258	15.7	22.2	2.1	62.5	35.6	4120																16.1604	987.216			1.2544	1.7161			56.3016	57.5693
2019-12-07_07:00:00	2019-12-07 17:00:01	0	40.38	20.14	0.48	0	0.01	294.34	-5.46	-7.78	21.19	9.50474	35.0613	15.1	21.9	1.9	63	36.4	3804																25.4016	998.56			0.5041	2.25			57.832	57.832
2019-12-07_08:00:00	2019-12-07 18:00:01	0	40.32	19.34	0.43	0	0.01	294.55	-4.27	-7.87	21.4	8.95376	28.4829	13.6	21.7	1.6	80.7	36.4	2128																32.9476	1149.21			0.09	2.2201			54.0778	54.0778
2019-12-07_09:00:00	2019-12-07 19:00:01	0	39.03	17.88	0.36	0	0.01	294.62	-2.78	-7.11	21.47	7.63417	21.3555	16.7	21	1.7	126.1	38.3	1038																1.3924	1040.71			0.2209	4.4944			35.2143	35.2143
2019-12-07_10:00:00	2019-12-07 20:00:01	0	38.85	17.03	0.32	0	0.01	294.54	-1.24	-6.21	21.39	6.33259	11.2923	15.9	20.7	1.9	139.9	36.4	691																1.2769	1149.89			0.4761	6.25			19.6479	19.6479
2019-12-07_11:00:00	2019-12-07 21:00:01	0	38.05	17.16	0.35	0	0.02	294.54	-0.14	-5.62	21.39	5.62174	1.42708	14.1	20.2	1.6	122.1	30.8	511																9.3636	1265.94			1.4161	9			16.1744	16.1744
2019-12-07_12:00:00	2019-12-07 22:00:01	0	37.5	18.14	0.45	0.01	0.02	294.5	-0.12	-5.29	21.35	5.29136	1.29957	12.4	19.8	2.5	104.2	40.8	609																32.9476	1317.69			2.4025	11.8336			7.7917	13.5083
2019-12-07_13:00:00	2019-12-07 23:00:01	0	39.07	20.45	0.61	0.01	0.02	294.33	-0.18	-4.23	21.18	4.23383	2.43673	16.6	19.3	2.4	85.5	39.1	555																14.8225	887.444			3.5344	16.8921			3.36293	6.33946
2019-12-07_14:00:00	2019-12-08 00:00:01	0	44.72	26.13	0.95	0.01	0.03	294.27	-0.94	-4.82	21.12	4.9108	11.0354	16.7	19.1	1.6	68.4	41.4	547																88.9249	576.48			4.0804	19.0969			10.9614	10.9614
2019-12-07_15:00:00	2019-12-08 01:00:01	0	57.1	37.72	1.59	0.01	0.03	294.14	-1.03	-4.8	20.99	4.90927	12.1111	17.1	19	1.3	56.2	41.6	555																425.184	425.184			3.9601	21.16			13.0268	13.0268
2019-12-07_16:00:00	2019-12-08 02:00:01	0	66.94	47.29	2.1	0.01	0.03	294.05	-1.2	-4.88	20.9	5.02538	13.8151	15.7	18.9	0.9	55.9	45.3	498																997.928	997.928			4	22.9441			17.0187	17.0187
2019-12-07_17:00:00	2019-12-08 03:00:01	0	71.74	52.86	2.4	0.01	0.03	294.03	-0.6	-5.23	20.88	5.2643	6.5446	17.1	19.4	1.4	66.3	32.3	506																1278.78	1278.78			2.1904	18.5761			14.9328	14.9328
2019-12-07_18:00:00	2019-12-08 04:00:01	0	82.94	64.81	3.04	0.01	0.04	293.97	0.68	-5.18	20.82	5.22444	352.521	19.4	19.1	1	40.3	33.6	523																2062.07	2062.07			2.9584	21.8089			17.8459	17.8459
2019-12-07_19:00:00	2019-12-08 05:00:01	0	99.64	82.25	3.96	0.02	0.03	294.21	1.72	-4.69	21.06	4.99545	339.86	20.3	18.7	0.4	332.3	35.5	508																3837.8	3837.8			5.5696	23.3289			21.1181	21.1181
2019-12-07_20:00:00	2019-12-08 06:00:01	0	113.14	97.14	4.79	0.02	0.03	295.14	2.01	-3.81	21.99	4.30769	332.186	14.4	19.2	0.5	323.5	32.5	364																6845.91	6845.91			7.7841	11.56			14.4985	14.4985
2019-12-07_21:00:00	2019-12-08 07:00:01	0	104.89	91.56	4.6	0.01	0.02	296.35	1.42	-3.52	23.2	3.79563	338.03	11.5	20.2	0.8	25.5	37.1	328																6409.6	6409.6			9	9			8.97379	8.97379
2019-12-07_22:00:00	2019-12-08 08:00:01	0	86.1	75.02	3.78	0.01	0.02	297.46	0.68	-4.04	24.31	4.09683	350.446	12	21.5	1.7	61.5	34.2	277																3971.52	3971.52			7.8961	7.8961			5.74478	5.74478
2019-12-07_23:00:00	2019-12-08 09:00:01	0	59.74	52.2	2.64	0.01	0.02	299.13	0.9	-3.44	25.98	3.55578	345.339	7.5	22.1	2.5	59.8	35.4	276																1998.09	1998.09			15.0544	15.0544			1.11468	3.76276
2019-12-08_00:00:00	2019-12-08 10:00:01	0.04	43.83	37.59	1.88	0.01	0.02	299.46	-0.81	-3.56	26.31	3.65099	12.8183	9.6	22.3	2.8	58.7	27.1	261																783.44	783.44			16.0801	16.1604			0.724177	5.45216
2019-12-08_01:00:00	2019-12-08 11:00:01	0.04	51.46	43.65	2.13	0.01	0.02	297.27	-3.3	-4.33	24.12	5.44416	37.312	8.1	22.6	3.2	59.7	27.6	227																1263.8	1263.8			2.3104	4.5369			5.03626	20.5043
2019-12-08_02:00:00	2019-12-08 12:00:01	0.02	61.36	52.23	2.5	0.01	0.03	295.82	-3.54	-4.16	22.67	5.46234	40.3966	9.2	22.8	3.4	54.4	23.2	113																1851.58	1851.58			0.0169	0.7744			4.25326	22.5278
2019-12-08_03:00:00	2019-12-08 13:00:01	0.01	75.61	64.62	3.05	0.01	0.03	294.78	-3	-3.05	21.63	4.27814	44.5266	9.5	23.1	3.5	53.9	25.6	109																3038.21	3038.21			2.1609	2.1609			0.605505	13.4113
2019-12-08_04:00:00	2019-12-08 14:00:01	0.02	65	55.15	2.57	0.01	0.02	294.96	-2.33	-2.44	21.81	3.3738	43.6791	7.1	23	3.5	54.6	23.1	338																2308.8	2308.8			1.4161	1.4161			0.0159274	7.60544
2019-12-08_05:00:00	2019-12-08 15:00:01	0.01	48.73	40.33	1.83	0.01	0.02	295.77	-2.18	-3.52	22.62	4.14039	31.7708	7.9	22.9	3.1	52.6	24.1	422																1051.7	1051.7			0.0784	0.8649			1.0824	9.76179
2019-12-08_06:00:00	2019-12-08 16:00:01	0.01	37.5	30.57	1.36	0.01	0.01	296.96	-2.09	-5.64	23.81	6.01479	20.3332	7.7	22.5	2.8	46.5	24.6	299																523.037	816.245			1.7161	2.9584			10.3349	22.0786
2019-12-08_07:00:00	2019-12-08 17:00:01	0	34.36	27.9	1.22	0	0.01	297.28	-2.8	-6.51	24.13	7.08661	23.273	7.2	22.2	2.3	45.8	28.7	222																428.49	1007.43			3.7249	3.7249			22.9117	27.7794
2019-12-08_08:00:00	2019-12-08 18:00:01	0	40.21	29.14	1.16	0.01	0.02	296.32	-0.99	-2.52	23.17	2.70749	21.4478	10.2	21.8	2.7	44.5	32.7	198																358.724	756.25			1.8769	1.8769			5.60943e-05	1.66795
2019-12-08_09:00:00	2019-12-08 19:00:01	0	42.6	28.55	1.03	0.01	0.02	295.69	-2.06	-2.13	22.54	2.96319	44.043	10.8	21.4	2.2	41	42.1	200																315.062	755.7			1.2996	1.2996			0.58246	1.09661
2019-12-08_10:00:00	2019-12-08 20:00:01	0	43.8	27.9	0.94	0.01	0.02	295.55	-1.1	1.1	22.4	1.55563	135	10.1	21.2	2.1	39.2	32.1	113																316.84	831.746			1.44	1.44			0.296333	0.296333
2019-12-08_11:00:00	2019-12-08 21:00:01	0.02	71.91	56.47	2.15	0.01	0.01	294.07	1.93	8.27	20.92	8.49222	193.136			2	43		148																3188.86	3188.86			437.646	560.269			42.1489	42.1489
2019-12-08_12:00:00	2019-12-08 22:00:01	0.07	66.79	52.01	1.9	0.01	0.01	293.72	2.59	6.81	20.57	7.28589	200.823			1.5	29.2		146																2705.04	2705.04			423.125	576.96			33.4765	33.4765
2019-12-08_13:00:00	2019-12-08 23:00:01	0.1	63.4	47.79	1.68	0.01	0.01	293.18	1.64	6.49	20.03	6.694	194.181			1.2	29.5		124																2283.88	2283.88			401.201	603.194			30.1841	30.1841
2019-12-08_14:00:00	2019-12-09 00:00:01	0.1	61.74	46.51	1.63	0.01	0.01	293.12	0.58	5.14	19.97	5.17262	186.438			1.1	36.7		142																2163.18	2163.18			398.801	606.144			16.5862	16.5862
2019-12-08_15:00:00	2019-12-09 01:00:01	0.09	61.44	46.36	1.63	0.01	0.01	292.98	0.79	4.55	19.83	4.61807	189.85			0.8	18.5		118																2149.25	2149.25			393.229	613.058			14.5777	14.5777
2019-12-08_16:00:00	2019-12-09 02:00:01	0.09	60.2	45.3	1.58	0.01	0.01	292.97	0.17	4.24	19.82	4.24341	182.296			0.9	21.2		184																2052.09	2052.09			392.832	613.553			11.1784	11.1784
2019-12-08_17:00:00	2019-12-09 03:00:01	0.08	59.11	43.72	1.49	0.01	0.01	292.72	-0.24	3.76	19.57	3.76765	176.348			1	23.5		184																1911.44	1911.44			382.985	626			7.6599	7.6599
2019-12-08_18:00:00	2019-12-09 04:00:01	0.1	56.02	41.04	1.38	0.01	0.02	292.7	1.14	3.6	19.55	3.77619	197.571			1.1	22.8		209																1684.28	1684.28			382.203	627.002			7.16199	7.16199
2019-12-08_19:00:00	2019-12-09 05:00:01	0.09	53.36	38.21	1.25	0.01	0.02	292.71	0.47	2.7	19.56	2.7406	189.875			1	23.4		157																1460	1460			382.594	626.501			3.0297	3.0297
2019-12-08_20:00:00	2019-12-09 06:00:01	0.07	51.95	35.84	1.12	0.01	0.02	292.67	1.01	1.3	19.52	1.64624	217.844			1.1	24.1		196																1284.51	1284.51			381.03	628.505			0.298376	1.87625
2019-12-08_21:00:00	2019-12-09 07:00:01	0.05	50.09	32.83	0.97	0.01	0.02	292.98	0.14	-0.16	19.83	0.212603	318.814			1.5	30.5		182																1077.81	1156.68			393.229	613.058			1.65739	5.77632
2019-12-08_22:00:00	2019-12-09 08:00:01	0.03	48.71	30.77	0.86	0.01	0.02	292.85	-1.58	-1.01	19.7	1.87523	57.4118			1.7	34.8		252																946.793	1301.04			388.09	619.512			0.0307067	0.292429
2019-12-08_23:00:00	2019-12-09 09:00:01	0.02	46.5	27.96	0.71	0	0.01	292.47	-3.35	-1.53	19.32	3.68285	65.4532			2.3	50.7		212																781.762	1511.65			373.262	638.573			1.91228	3.48514
2019-12-09_00:00:00	2019-12-09 10:00:01	0.02	46.57	27.4	0.66	0	0.01	292.48	-3.24	-1.94	19.33	3.7764	59.0884			2.8	51.5		246																750.76	1555.51			373.649	638.068			0.953358	6.05357
2019-12-09_01:00:00	2019-12-09 11:00:01	0.02	48.28	27.97	0.66	0	0.01	292.5	-3.3	-0.08	19.35	3.30097	88.6114			3.9	50.9		274																782.321	1510.88			374.423	637.058			0.358837	9.51704
2019-12-09_02:00:00	2019-12-09 12:00:01	0.02	48.05	28.04	0.67	0	0.01	292.81	-2.45	0.24	19.66	2.46173	95.5947			3.9	46.1		337																786.242	1505.44			386.516	621.505			2.06863	5.04329
2019-12-09_03:00:00	2019-12-09 13:00:01	0.02	47.69	28.65	0.72	0	0.01	292.84	-1.8	0.01	19.69	1.80003	90.3182			4.1	47.5		350																820.822	1458.48			387.696	620.01			5.28987	5.28987
2019-12-09_04:00:00	2019-12-09 14:00:01	0.02	47.82	29.47	0.78	0	0.01	292.91	-0.99	0.14	19.76	0.99985	98.0489			4.1	41.7		457																868.481	1396.52			390.458	616.529			9.61093	9.61093
2019-12-09_05:00:00	2019-12-09 15:00:01	0.03	45.06	28.94	0.82	0	0.01	293.05	0.24	-0.85	19.9	0.883233	344.233			3.7	41.6		908																837.524	1436.41			396.01	609.596			7.93418	7.93418
2019-12-09_06:00:00	2019-12-09 16:00:01	0.02	43.4	29.1	0.88	0.01	0.02	293.12	-1.58	-2.55	19.97	2.99982	31.7828			3.6	43.9		725																846.81	1424.31			398.801	606.144			0.36022	6.16935
2019-12-09_07:00:00	2019-12-09 17:00:01	0.02	42.43	29.77	0.98	0.01	0.02	293.22	-0.77	-0.86	20.07	1.15434	41.8397	15	22.2	3.5	41.3	40.4	790																218.153	487.085			4.5369	5.3824			5.50212	5.50212
2019-12-09_08:00:00	2019-12-09 18:00:01	0.04	42.73	30.33	1.07	0.01	0.02	293.53	-0.92	-2.18	20.38	2.36618	22.8807	17.6	21.9	2.6	39	49.3	625																162.053	357.588			2.3104	5.3361			0.0546726	0.722803
2019-12-09_09:00:00	2019-12-09 19:00:01	0.16	46.84	32.16	1.22	0.01	0.03	294.7	1.16	-0.57	21.55	1.29248	296.169	20	21.3	2.5	44.5	50.6	602																147.866	215.502			0.0625	3.0276			1.45811	1.45811
2019-12-09_10:00:00	2019-12-09 20:00:01	0.36	57.8	40.96	1.8	0.01	0.03	295.95	1.89	-1.43	22.8	2.37002	307.112	18.3	21	2.1	49	58.1	404																513.476	513.476			3.24	3.24			0.0729114	0.125331
2019-12-09_11:00:00	2019-12-09 21:00:01	0.72	71.77	51.88	2.53	0.01	0.03	296.94	1.73	-3.28	23.79	3.70827	332.191	20.7	21.1	1.4	23.4	47.7	288																972.192	972.192			7.2361	7.2361			5.32813	5.32813
2019-12-09_12:00:00	2019-12-09 22:00:01	0.33	56.63	40.28	1.54	0.01	0.01	293.27	1.64	9.37	20.12	9.51244	189.928	17.8	20.9	0.8	32.7	41.5																	505.35	505.35			0.6084	12.7449			75.9066	75.9066
2019-12-09_13:00:00	2019-12-09 23:00:01	0.2	60.56	43.04	1.54	0.01	0.01	293.62	2.73	10.22	20.47	10.5783	194.956	14.8	20.4	0.6	47.4	44.7	294																797.498	797.498			0.0049	13.8384			99.5673	99.5673
2019-12-09_14:00:00	2019-12-10 00:00:01	0.17	67.94	49.78	1.89	0.01	0.01	293.65	1.7	8.07	20.5	8.24711	191.896	11.1	20.1	0.7	45.3	43.6	414																1496.14	1496.14			0.16	15.9201			56.9589	56.9589
2019-12-09_15:00:00	2019-12-10 01:00:01	0.21	71.85	54.15	2.16	0.01	0.01	293.77	1.2	6.59	20.62	6.69837	190.32	13.6	20	0.6	61.5	49	559																1644.3	1644.3			0.3844	15.7609			37.1901	37.1901
2019-12-09_16:00:00	2019-12-10 02:00:01	0.24	69.13	51.92	2.05	0.01	0.01	293.85	0.2	5.52	20.7	5.52362	182.075	13.7	19.6	0.8	23.9	39.5	707																1460.77	1460.77			1.21	18.4041			22.3126	22.3126
2019-12-09_17:00:00	2019-12-10 03:00:01	0.27	65.05	47.91	1.83	0.01	0.01	293.88	0.42	8.48	20.73	8.49039	182.835	12.9	19	0.2	27.3	29.8	550																1225.7	1225.7			2.9929	23.6196			68.7306	68.7306
2019-12-09_18:00:00	2019-12-10 04:00:01	0.36	54.44	39.48	1.44	0	0.01	293.86	2.78	10.01	20.71	10.3889	195.521	13.5	18.2	0.3	250.9	27.1	565																674.96	674.96			6.3001	32.2624			101.785	101.785
2019-12-09_19:00:00	2019-12-10 05:00:01	0.31	48.54	32.94	1.02	0	0.01	292.98	4.1	10.7	19.83	11.4586	200.966	12.2	17.5	0.5	248.7	34.5	561																430.148	470.89			5.4289	52.7076			120.091	120.091
2019-12-09_20:00:00	2019-12-10 06:00:01	0.41	42.42	25.08	0.64	0	0.01	292.9	4.4	9.74	19.75	10.6877	204.311	24.3	18.1	1	251.3	57.1	715																0.6084	304.852			2.7225	45.4276			93.8521	93.8521
2019-12-09_21:00:00	2019-12-10 07:00:01	0.42	34.48	15.56	0.29	0	0	293.23	3.46	9.19	20.08	9.81976	200.631	12.2	20.4	0.4	242.9	72.6	750																11.2896	1527.25			0.1024	16.8921			88.7319	88.7319
2019-12-09_22:00:00	2019-12-10 08:00:02	0.34	31.23	11.72	0.14	0	0	293.62	1.45	8.71	20.47	8.82987	189.452	54.8	23.8	0.7	57.3	207.6	729																1855.89	1855.89			11.0889	11.0889			66.0948	66.0948
2019-12-09_23:00:00	2019-12-10 09:00:02	0.26	31.92	10.57	0.06	0	0	293.62	0.19	9.65	20.47	9.65187	181.128	159.8	25.7	1	77.4	367	680																22269.6	22269.6			27.3529	27.3529			74.8549	74.8549
2019-12-10_00:00:00	2019-12-10 10:00:02	0.2	38.2	12.1	0.01	0	0	292.9	-1.31	10.89	19.75	10.9685	173.141	299.7	26.3	1.6	71.8	459.1	697																82713.8	82713.8			42.9025	42.9025			87.769	87.769
2019-12-10_01:00:00	2019-12-10 11:00:02	0.18	44.13	14.28	0.01	0	0	292.37	-1.6	10.25	19.22	10.3741	171.128	250.3	26.8	2.4	146.3	208.6	571																55705.4	55705.4			57.4564	57.4564			63.5867	74.9632
2019-12-10_02:00:00	2019-12-10 12:00:02	0.13	50.49	16.66	0.01	0	0	292.13	-1.98	9.34	18.98	9.54757	168.031	151.4	23.8	3.3	161.9	86.3	676																18154.9	18154.9			23.2324	23.2324			39.0321	76.2402
2019-12-10_03:00:00	2019-12-10 13:00:02	0.11	52.1	17.23	0.01	0	0	292.01	-2.01	8.85	18.86	9.07538	167.204	86.7	24.6	2.6	158.2	81.6	860																4826.08	4826.08			32.9476	32.9476			41.9306	57.1443
2019-12-10_04:00:00	2019-12-10 14:00:02	0.1	48.5	16.24	0.02	0	0	291.88	-2.22	8.52	18.73	8.80448	165.395	70.7	24.3	2.8	153.6	97.9	2148																2965.89	2965.89			31.0249	31.0249			36.0537	56.0773
2019-12-10_05:00:00	2019-12-10 15:00:02	0.03	51.15	17.26	0.01	0	0	291.85	-2.23	8.4	18.7	8.69097	165.132	72.8	23.3	4	162.6	85.1	4015																3084.69	3084.69			21.16	21.16			22.0052	73.5301
2019-12-10_06:00:00	2019-12-10 16:00:02	0.01	51.96	17.55	0.01	0	0	291.77	-1.96	8.79	18.62	9.00587	167.43	55.2	22.4	4.8	168.1	49.1	3891																1417.52	1417.52			14.2884	14.2884			17.6893	93.8936
2019-12-10_07:00:00	2019-12-10 17:00:02	0.01	53.41	18.21	0	0	0	291.65	-1.36	9.26	18.5	9.35934	171.645	39.5	21.2	5.3	171.5	52.9	9371																453.264	453.264			7.29	23.9121			16.4782	111.162
2019-12-10_08:00:00	2019-12-10 18:00:02	0	51.91	17.9	0	0	0	291.48	-0.46	9.68	18.33	9.69092	177.279	29	20.5	5.6	173.2	43.8	14048																123.21	397.604			4.7089	33.1776			16.7357	124.879
2019-12-10_09:00:00	2019-12-10 19:00:02	0	48.5	16.89	0	0	0	291.42	0.45	9.64	18.27	9.6505	182.673	17	19.6	5.3	172.7	41.6	14665																0.0121	1085.7			1.7689	45.1584			18.9268	117.386
2019-12-10_10:00:00	2019-12-10 20:00:02	0	42.93	15.07	0	0	0	291.36	0.67	9.4	18.21	9.42385	184.077	16	19.2	4.4	172.7	40.9	8407																0.8649	1279.49			0.9801	51.5524			25.239	94.2423
2019-12-10_11:00:00	2019-12-10 21:00:02	0	40.26	14.44	0	0	0	291.14	1.12	9.01	17.99	9.07934	187.086	14.9	18.9	3.4	183	27.8	2641																0.2116	1406.25			0.8281	59.29			32.255	69.9455
2019-12-10_12:00:00	2019-12-10 22:00:02	0	40.85	14.81	0.01	0	0	291.04	1.31	8.37	17.89	8.47189	188.895	17.3	18.4	3.5	180.1	27	2981																6.2001	1206.17			0.2601	68.89			24.7197	61.7151
2019-12-10_13:00:00	2019-12-10 23:00:02	0	39.97	14.6	0.02	0	0	290.74	1.27	8.31	17.59	8.40649	188.689	18.9	18.2	3.6	179.4	25.4	3119																18.49	1111.56			0.3721	77.44			23.1023	62.2598
2019-12-10_14:00:00	2019-12-11 00:00:02	0	36.36	13.7	0.04	0	0	290.51	1.03	7.66	17.36	7.72894	187.658	15	18.1	2.5	187.4	23.3	2251																1.69	1454.66			0.5476	83.3569			27.3418	37.368
2019-12-10_15:00:00	2019-12-11 01:00:02	0	35.09	13.59	0.04	0	0	290.25	0.59	7.49	17.1	7.5132	184.504	12.9	18.3	1.8	203	22.8	930																0.4761	1628.12			1.44	84.4561			32.6407	32.6407
2019-12-10_16:00:00	2019-12-11 02:00:02	0	34.26	13.52	0.04	0	0	290.02	0.49	7.4	16.87	7.41621	183.788	11.9	18.2	1.9	226	22.2	562																2.6244	1715.62			1.7689	90.6304			30.4285	30.4285
2019-12-10_17:00:00	2019-12-11 03:00:02	0	34.16	13.64	0.05	0	0	289.9	0.27	7.1	16.75	7.10513	182.178	10.3	17.9	1.7	227.7	23	494																11.1556	1840.41			1.3225	98.8036			29.2155	29.2155
2019-12-10_18:00:00	2019-12-11 04:00:02	0	34.52	13.78	0.05	0	0	289.78	0.12	6.53	16.63	6.5311	181.053	9.6	18	1.7	228.2	24.9	468																17.4724	1888.77			1.8769	99.2016			23.3396	23.3396
2019-12-10_19:00:00	2019-12-11 05:00:02	0	33.48	13.53	0.06	0	0	289.73	0.16	6.24	16.58	6.24205	181.469	10.9	18.1	1.6	230.8	27	377																6.9169	1798.61			2.3104	98.2081			21.5486	21.5486
2019-12-10_20:00:00	2019-12-11 06:00:02	0	32.31	13.42	0.08	0	0	289.71	0.46	6.36	16.56	6.37661	184.137	9.5	18.2	1.7	223.3	32.2	202																15.3664	1928.97			2.6896	96.6289			21.8707	21.8707
2019-12-10_21:00:00	2019-12-11 07:00:02	0	30.3	12.98	0.09	0	0	289.88	0.48	5.9	16.73	5.91949	184.651	6.6	18.4	1.7	222.3	37.1	220																40.7044	2233.51			2.7889	89.4916			17.8041	17.8041
2019-12-10_22:00:00	2019-12-11 08:00:02	0	28.27	12.21	0.09	0	0	290.1	0.12	5.74	16.95	5.74125	181.198	9	18.8	1.7	214.9	34.5	201																10.3041	2082.1			3.4225	78.1456			16.3317	16.3317
2019-12-10_23:00:00	2019-12-11 09:00:02	0	22.74	9.59	0.04	0	0	290.5	-1.31	5.71	17.35	5.85834	167.079	11.3	19.1	1.5	218.8	25.3	171																2.9241	2111.4			3.0625	66.2596			18.9952	18.9952
2019-12-11_00:00:00	2019-12-11 10:00:02	0	19.56	7.94	0.01	0	0	290.71	-2.31	5.13	17.56	5.6261	155.758	13.9	20	1.2	194.8	33.9	133																35.5216	2025			5.9536	49.4209			19.5904	19.5904
2019-12-11_01:00:00	2019-12-11 11:00:02	0	19.81	7.77	0	0	0	290.71	-3.14	4.39	17.56	5.39738	144.425	9.5	20.4	3.1	139.3	34.2	134																2.9929	2457.18			8.0656	43.9569			5.27795	19.1965
2019-12-11_02:00:00	2019-12-11 12:00:02	0	21.09	8.08	0	0	0	290.63	-3.68	4.14	17.48	5.53913	138.366	8.7	20.2	2.9	139.2	28.9	152																0.3844	2506			7.3984	47.7481			6.96503	18.6895
2019-12-11_03:00:00	2019-12-11 13:00:02	0	22.1	8.25	0	0	0	290.51	-3.83	3.87	17.36	5.4448	135.298	10.8	20.8	3.3	132.6	26.7	188																6.5025	2283.88			11.8336	41.3449			4.60015	21.4257
2019-12-11_04:00:00	2019-12-11 14:00:02	0	23.5	8.73	0	0	0	290.59	-4.2	3.62	17.44	5.54476	130.758	12.9	21.1	3	134	26.4	322																17.3889	2043.94			13.3956	36.6025			6.47582	19.6139
2019-12-11_05:00:00	2019-12-11 15:00:02	0	24.55	9.25	0	0	0	290.77	-4.46	3.05	17.62	5.40316	124.366	6.5	20.3	2.9	140.7	21.8	557																7.5625	2610.19			7.1824	44.4889			6.26579	17.5323
2019-12-11_06:00:00	2019-12-11 16:00:02	0	25.37	9.65	0	0	0	290.88	-4.59	2.5	17.73	5.22667	118.575	11	19.8	2.4	136.2	21.5	720																1.8225	2133.52			4.2849	49.8436			7.99007	12.3248
2019-12-11_07:00:00	2019-12-11 17:00:02	0	26.49	10.15	0	0	0	290.93	-4.46	1.72	17.78	4.78017	111.089	6.5	19.4	2.3	152	19.9	567																13.3225	2519.04			2.6244	54.9081			6.15123	8.78629
2019-12-11_08:00:00	2019-12-11 18:00:02	0	27.68	10.64	0	0	0	291.03	-4.29	0.81	17.88	4.3658	100.692	8.7	19.1	2	159	22.3	442																3.7636	2256.25			1.4884	57.9121			5.597	5.597
2019-12-11_09:00:00	2019-12-11 19:00:02	0	27.95	10.8	0	0	0	291.11	-4.3	0.11	17.96	4.30141	91.4652	10	19	2.4	160.5	22.2	582																0.64	2119.68			1.0816	58.2169			3.61535	6.68433
2019-12-11_10:00:00	2019-12-11 20:00:02	0	27.83	10.88	0	0	0	291.32	-4.14	-0.32	18.17	4.15235	85.5803	6.8	18.9	2	165.5	23.9	430																16.6464	2416.71			0.5329	56.5504			4.63261	4.63261
2019-12-11_11:00:00	2019-12-11 21:00:02	0	28.07	11.2	0	0	0	291.41	-3.69	-0.52	18.26	3.72646	81.9788	11.6	18.8	1.9	166.3	24.8	339																0.16	1939.52			0.2916	56.7009			3.33595	3.33595
2019-12-11_12:00:00	2019-12-11 22:00:02	0	28.88	11.7	0	0	0	291.44	-3.26	-0.6	18.29	3.31475	79.5716	16.6	18.6	1.5	209.4	25.8	279																24.01	1485.33			0.0961	59.29			3.29334	3.29334
2019-12-11_13:00:00	2019-12-11 23:00:02	0	29.51	12.05	0	0	0	291.43	-2.81	-0.46	18.28	2.8474	80.7032	12.1	18.3	1.9	234.2	18.8	237																0.0025	1822.44			0.0004	64.1601			0.897571	0.897571
2019-12-11_14:00:00	2019-12-12 00:00:02	0.01	28.99	11.97	0.01	0	0	291.44	-2.29	0.35	18.29	2.31659	98.6896	7.7	18.1	1.5	234.2	17.8	314																18.2329	2225.01			0.0361	67.24			0.666823	0.666823
2019-12-11_15:00:00	2019-12-12 01:00:02	0.01	28.28	11.81	0.01	0	0	291.31	-2.09	0.93	18.16	2.28758	113.988	8.2	18	1.2	235.6	18.5	279																13.0321	2193.05			0.0256	71.0649			1.18282	1.18282
2019-12-11_16:00:00	2019-12-12 02:00:02	0.01	28.85	12.02	0.01	0	0	291.1	-1.77	1.46	17.95	2.29445	129.518	8.8	18.1	1.4	225	16.8	268																10.3684	2117.84			0.0225	72.9316			0.80004	0.80004
2019-12-11_17:00:00	2019-12-12 03:00:02	0.01	30.09	12.47	0.01	0	0	290.91	-1.39	1.63	17.76	2.1422	139.544	6.8	18.1	1.2	215.5	13.3	256																32.1489	2262.9			0.1156	76.2129			0.887732	0.887732
2019-12-11_18:00:00	2019-12-12 04:00:02	0	30.82	12.84	0.01	0	0.01	290.78	-0.9	2.08	17.63	2.26636	156.602	7.8	18	1.3	225.2	18.1	256																25.4016	2134.44			0.1369	80.2816			0.933857	0.933857
2019-12-11_19:00:00	2019-12-12 05:00:02	0	31.23	13.08	0.01	0	0.01	290.72	-0.44	2.53	17.57	2.56798	170.134	-1.2	17.9	1	196.9	21.5	299																203.918	3020.6			0.1089	83.1744			2.45855	2.45855
2019-12-11_20:00:00	2019-12-12 06:00:02	0	31.57	13.2	0.01	0	0.01	290.53	-0.19	2.99	17.38	2.99603	176.364	-2.3	17.9	1	236	19.9	370																240.25	3129.28			0.2704	86.6761			3.98414	3.98414
2019-12-11_21:00:00	2019-12-12 07:00:02	0	31.7	13.12	0	0	0.01	290.42	-0.38	3.25	17.27	3.27214	173.331	5.4	18.5	1.1	196	19	316																59.5984	2334.82			1.5129	77.7924			4.71819	4.71819
2019-12-11_22:00:00	2019-12-12 08:00:02	0	31.58	13.11	0	0	0	290.46	-1.17	3.05	17.31	3.26671	159.013	9	19.3	1.2	177	23.8	205																16.8921	2000.77			3.9601	63.6804			4.27129	4.27129
2019-12-11_23:00:00	2019-12-12 09:00:02	0	32.07	13.57	0	0	0	290.55	-2.02	2.99	17.4	3.60839	145.958	7	18.6	2.5	134.9	26.5	188																43.1649	2140.91			1.44	73.7881			1.22854	3.96963
2019-12-12_00:00:00	2019-12-12 10:00:02	0	33.2	14.34	0	0	0	290.56	-2.92	1.99	17.41	3.53362	124.275	2.2	18.8	2.2	138.9	14.5	241																147.38	2530.09			1.9321	70.2244			1.77855	2.61671
2019-12-12_01:00:00	2019-12-12 11:00:02	0	33.67	14.74	0	0	0	290.66	-3.78	1.04	17.51	3.92046	105.383	0.2	19.6	2.2	123.8	15.5	105																211.412	2693.61			4.3681	55.9504			2.95998	4.01786
2019-12-12_02:00:00	2019-12-12 12:00:02	0	33.3	14.73	0	0	0	290.87	-4.16	1.31	17.72	4.36139	107.479	5.8	20	2.6	122.6	15.4	112																79.7449	2144.62			5.1984	47.1969			3.10249	8.09623
2019-12-12_03:00:00	2019-12-12 13:00:02	0	31.24	14	0.01	0	0	291.19	-4.92	1.42	18.04	5.12082	106.099	8.6	19.6	2.2	135.4	15	229																29.16	1957.18			2.4336	48.3025			8.53119	10.2709
2019-12-12_04:00:00	2019-12-12 14:00:02	0.01	29.65	13.4	0.01	0	0	291.45	-5.44	2.09	18.3	5.82767	111.016	7.9	19.4	2.4	123.5	17.2	325																30.25	2073.89			1.21	47.4721			11.7489	16.9058
2019-12-12_05:00:00	2019-12-12 15:00:02	0.01	29.09	13.22	0.01	0	0	291.57	-5.31	2.23	18.42	5.75925	112.78	12.1	19.4	2.5	132	15.9	603																1.2544	1723.91			0.9604	45.8329			10.6227	17.1665
2019-12-12_06:00:00	2019-12-12 16:00:02	0	28.72	13.03	0.01	0	0	291.61	-5.45	2.15	18.46	5.85875	111.529	8.5	19.3	2.2	122	14.6	352																20.5209	2053			0.7056	46.6489			13.3865	15.5453
2019-12-12_07:00:00	2019-12-12 17:00:02	0	28.72	13.11	0	0	0	291.68	-4.95	3.54	18.53	6.08556	125.57	9.4	19.2	1.8	136.5	16.3	527																13.7641	1965.15			0.4489	47.0596			18.3661	18.3661
2019-12-12_08:00:00	2019-12-12 18:00:02	0	29.01	13.35	0	0	0	291.66	-4.38	4.2	18.51	6.06831	133.798	8.3	19.1	1.7	147.2	17.1	459																25.5025	2042.14			0.3481	48.7204			19.0821	19.0821
2019-12-12_09:00:00	2019-12-12 19:00:02	0	28.82	13.11	0	0	0	291.55	-3.91	4.47	18.4	5.93877	138.823	9.9	19	1.8	143.8	22.5	262																10.3041	1921.07			0.36	51.6961			17.1294	17.1294
2019-12-12_10:00:00	2019-12-12 20:00:02	0	26.45	12	0	0	0	291.41	-3.62	4.58	18.26	5.83788	141.677	7.9	18.8	1.8	152.9	17.1	209																16.81	2203.36			0.2916	56.7009			16.3044	16.3044
2019-12-12_11:00:00	2019-12-12 21:00:02	0	23.21	10.57	0.01	0	0	291.36	-3.19	4.39	18.21	5.42662	143.996	-0.5	18.8	1.6	156.3	12.9	241																122.545	3222.83			0.3481	57.4564			14.643	14.643
2019-12-12_12:00:00	2019-12-12 22:00:02	0	20.59	9.5	0.01	0	0	291.48	-2.76	3.9	18.33	4.77782	144.713	0.7	18.7	1.2	148.4	12.6	228																77.44	3208.09			0.1369	57.1536			12.8008	12.8008
2019-12-12_13:00:00	2019-12-12 23:00:02	0	18.84	8.87	0.02	0	0	291.54	-2.8	3.42	18.39	4.42	140.692	5.9	18.8	1.5	122.7	12.7	244																8.8209	2711.28			0.1681	54.76			8.5264	8.5264
2019-12-12_14:00:00	2019-12-13 00:00:02	0	17.29	8.32	0.03	0	0	291.64	-2.72	3.32	18.49	4.29195	140.673	5.5	18.8	1.3	148.4	17	239																7.9524	2811.12			0.0961	53.29			8.95174	8.95174
2019-12-12_15:00:00	2019-12-13 01:00:02	0	15.9	7.83	0.03	0	0	291.64	-2.81	3.65	18.49	4.60637	142.409	3.6	18.6	1.2	167.1	19.4	244																17.8929	3070.27			0.0121	56.25			11.6033	11.6033
2019-12-12_16:00:00	2019-12-13 02:00:02	0	15.97	7.8	0.03	0	0	291.48	-2.84	4.39	18.33	5.22855	147.1	3	17.9	1.1	222.5	18.1	289																23.04	3140.48			0.1849	69.8896			17.0449	17.0449
2019-12-12_17:00:00	2019-12-13 03:00:02	0	17.36	7.93	0.02	0	0	291.13	-2.7	5.2	17.98	5.85918	152.56	1.6	17.3	0.9	230.1	21.8	271																40.0689	3284.44			0.4624	86.6761			24.5935	24.5935
2019-12-12_18:00:00	2019-12-13 04:00:02	0	14.78	6.08	0.01	0	0	290.76	-3.11	5.92	17.61	6.68719	152.285	5.5	16.6	1.6	243.1	11	267																0.3364	3053.67			1.0201	107.744			25.8795	25.8795
2019-12-12_19:00:00	2019-12-13 05:00:02	0	14.36	5.28	0	0	0	290.36	-2.28	6.34	17.21	6.73751	160.22	8	16.7	1.6	246.4	12.4	185																7.3984	2868.67			0.2601	114.062			26.394	26.394
2019-12-12_20:00:00	2019-12-13 06:00:02	0	24.94	8.9	0	0	0	289.95	-1.77	5.85	16.8	6.11191	163.166	5.8	16.9	1.4	242.9	15.6	131																9.61	2718.58			0.01	118.592			22.2021	22.2021
2019-12-12_21:00:00	2019-12-13 07:00:02	0	38.86	13.78	0	0	0	289.7	-1.34	5.89	16.55	6.0405	167.183	7.5	17.3	1.3	240.7	18.3	109																39.4384	2075.71			0.5625	115.348			22.4724	22.4724
2019-12-12_22:00:00	2019-12-13 08:00:02	0	40.6	14.48	0	0	0	289.39	-0.73	6.95	16.24	6.98823	174.004	7.8	18	1.2	238.8	23.7	270																44.6224	1985.59			3.0976	107.122			33.5036	33.5036
2019-12-12_23:00:00	2019-12-13 09:00:02	0	34.09	12.15	0	0	0	289.45	-1.42	6.34	16.3	6.49708	167.375	7.6	18.7	1.1	123.6	28.2	197																20.7025	2217.47			5.76	91.9681			29.1284	29.1284
2019-12-13_00:00:00	2019-12-13 10:00:02	0	31.04	10.99	0	0	0	289.53	-1.28	5.4	16.38	5.54963	166.665	5.6	19.3	1.3	68.1	20.8	127																29.0521	2525.06			8.5264	79.3881			18.0594	18.0594
2019-12-13_01:00:00	2019-12-13 11:00:02	0	31.06	11.1	0	0	0	289.72	-2.5	5.43	16.57	5.97787	155.278	7.9	19.6	1.5	91.5	18.2	104																10.24	2288.67			9.1809	70.8964			20.0513	20.0513
2019-12-13_02:00:00	2019-12-13 12:00:03	0	30.95	11.22	0	0	0	289.77	-3.18	5.06	16.62	5.97629	147.852	4.1	20.3	2	98.9	19.2	213																50.6944	2654.31			13.5424	58.8289			15.8109	15.8109
2019-12-13_03:00:00	2019-12-13 13:00:03	0	30.36	11.15	0	0	0	289.76	-3.93	4.39	16.61	5.89211	138.164	2.1	19.9	2.5	107.6	16.6	119																81.9025	2871.89			10.8241	65.2864			11.5064	18.2851
2019-12-13_04:00:00	2019-12-13 14:00:03	0	30.05	11.11	0	0	0	289.92	-4.1	3.42	16.77	5.33914	129.833	4.7	20	2	92.2	17.4	260																41.0881	2604.06			10.4329	61.1524			11.1498	11.1498
2019-12-13_05:00:00	2019-12-13 15:00:03	0	30.26	11.18	0	0	0	290.11	-4.56	2.48	16.96	5.19076	118.54	5.9	19.7	1.9	81.8	15.8	480																27.8784	2476.06			7.5076	62.8849			10.8291	10.8291
2019-12-13_06:00:00	2019-12-13 16:00:03	0	30.79	11.4	0	0	0	290.35	-4.95	2.12	17.2	5.38488	113.184	2.5	19.7	1.6	89.5	16.8	463																79.21	2802.64			6.25	59.1361			14.3253	14.3253
2019-12-13_07:00:00	2019-12-13 17:00:03	0	31.53	11.72	0	0	0	290.44	-4.71	2.7	17.29	5.42901	119.823	4	19.5	1.4	91.4	17.5	605																59.5984	2613.25			4.8841	60.84			16.2329	16.2329
2019-12-13_08:00:00	2019-12-13 18:00:03	0	32.73	12.2	0	0	0	290.46	-4.58	2.5	17.31	5.21789	118.628	4.4	19.5	1.6	66.3	18.8	492																60.84	2524.06			4.7961	60.5284			13.0891	13.0891
2019-12-13_09:00:00	2019-12-13 19:00:03	0	33.37	12.52	0	0	0	290.41	-4.24	2.06	17.26	4.71394	115.913	5	19.4	1.1	70.3	22.5	132																56.5504	2432.46			4.5796	62.8849			13.0605	13.0605
2019-12-13_10:00:00	2019-12-13 20:00:03	0	33.13	12.57	0.01	0	0	290.47	-3.92	1.93	17.32	4.36936	116.213	-0.7	19.5	1.1	86.8	22.8	111																176.093	3021.7			4.7524	60.3729			10.6887	10.6887
2019-12-13_11:00:00	2019-12-13 21:00:03	0	32.73	12.6	0.01	0	0	290.41	-3.82	1.84	17.26	4.24005	115.719	1.6	19.2	0.3	162.3	23.5	115																121	2770.97			3.7636	66.0969			15.524	15.524
2019-12-13_12:00:00	2019-12-13 22:00:03	0	32.44	12.65	0.01	0	0	290.45	-3.34	1.4	17.3	3.62155	112.741	2.5	19.1	0.8	250.8	18.4	117																103.023	2671.86			3.24	67.0761			7.96113	7.96113
2019-12-13_13:00:00	2019-12-13 23:00:03	0	32.21	12.68	0.01	0	0	290.56	-2.86	0.68	17.41	2.93973	103.374	5.1	18.9	1.1	238.7	16.4	121																57.4564	2406.88			2.2201	68.5584			3.3846	3.3846
2019-12-13_14:00:00	2019-12-14 00:00:03	0	32.49	12.77	0.01	0	0	290.7	-1.97	-0.11	17.55	1.97307	86.8042	4.6	18.6	1.3	241.6	21.1	160																66.7489	2447.28			1.1025	71.2336			0.453021	0.710533
2019-12-13_15:00:00	2019-12-14 01:00:03	0	32.61	12.69	0.01	0	0.01	290.67	-0.91	-1.3	17.52	1.58685	34.9921	0.5	17.9	1	227	12.8	184																148.596	2878.32			0.1444	84.0889			0.344396	2.33829
2019-12-13_16:00:00	2019-12-14 02:00:03	0	32.31	12.36	0.01	0	0.01	290.73	-0.4	-2.53	17.58	2.56143	8.98434	3.6	17.1	1.3	242.1	11.6	183																76.7376	2588.77			0.2304	98.2081			1.59119	1.59119
2019-12-13_17:00:00	2019-12-14 03:00:03	0	32.53	11.97	0.01	0	0.01	290.54	1.43	-3.18	17.39	3.48673	335.787	3.1	16.6	1.2	235.2	11.3	188																78.6769	2680.13			0.6241	112.36			5.22914	5.22914
2019-12-13_18:00:00	2019-12-14 04:00:03	0	34.79	11.92	0.02	0	0.02	290.16	3.49	-2.94	17.01	4.5633	310.111	4.4	16	0.7	236.7	10.4	227																56.5504	2552.27			1.0201	134.096			14.9251	14.9251
2019-12-13_19:00:00	2019-12-14 05:00:03	0	34.1	11.55	0.03	0	0.02	290.23	3.63	-2.81	17.08	4.59053	307.744	7	16.1	0.7	226	15.2	177																20.7025	2331.92			0.9604	130.188			15.1363	15.1363
2019-12-13_20:00:00	2019-12-14 06:00:03	0	29.04	10.62	0.02	0	0.01	290.94	2.26	-4.25	17.79	4.81353	331.998	-0.6	17	0.7	227.3	17.1	328																125.888	3228.51			0.6241	96.04			16.9212	16.9212
2019-12-13_21:00:00	2019-12-14 07:00:03	0	26.11	10.13	0.03	0	0.01	291.82	2.15	-4.74	18.67	5.20482	335.602	1.4	18.6	0.7	214.8	25.6	288																76.2129	3059.2			0.0049	53.5824			20.2934	20.2934
2019-12-13_22:00:00	2019-12-14 08:00:03	0	24.03	10.07	0.08	0	0.01	293.05	1.88	-4.16	19.9	4.56508	335.681	6	20.1	1.2	124.2	40.1	330																16.5649	2577.59			0.04	21.0681			11.3238	11.3238
2019-12-13_23:00:00	2019-12-14 09:00:03	0	22.59	9.79	0.11	0	0.01	294.01	-0.47	-3.1	20.86	3.13543	8.62121	6.2	20.8	2	104	26.7	336																12.8881	2585.72			0.0036	8.5849			1.28919	1.28919
2019-12-14_00:00:00	2019-12-14 10:00:03	0	25.15	9.82	0.08	0.01	0.02	293.34	-4.61	-3.22	20.19	5.62321	55.0665	4.5	21.2	2	101.5	24	230																28.3024	2758.35			1.0201	10.24			13.1277	13.1277
2019-12-14_01:00:00	2019-12-14 11:00:03	0	28.98	10.49	0.03	0.01	0.03	292.56	-6.11	-4	19.41	7.30288	56.7888	9	21.5	2.3	76.9	27.6	190																2.2201	2242.02			4.3681	13.5424			25.0288	30.1059
2019-12-14_02:00:00	2019-12-14 12:00:03	0	28.55	10.63	0.02	0	0.02	292.34	-5.93	-3.72	19.19	7.00024	57.8993	12.6	21.9	2.4	78.8	26.9	259																3.8809	1901.83			7.3441	12.25			21.1622	27.9231
2019-12-14_03:00:00	2019-12-14 13:00:03	0	27.07	10.32	0.02	0	0.01	292.44	-6.01	-3.29	19.29	6.85158	61.3029	6.6	22.2	1.7	85.1	27	363																13.8384	2492.01			8.4681	9.61			26.5388	26.5388
2019-12-14_04:00:00	2019-12-14 14:00:03	0	26.52	10.31	0.04	0	0.01	292.72	-5.78	-2.89	19.57	6.46224	63.4351	5.7	22.4	1.8	82.7	33.4	558																21.2521	2583.69			8.0089	8.0089			21.7364	21.7364
2019-12-14_05:00:00	2019-12-14 15:00:03	0	25.24	9.8	0.04	0	0.01	292.95	-4.82	-2.76	19.8	5.55428	60.2041	14.3	22.5	2	117.2	32	736																20.25	1826.71			7.29	7.29			12.6329	12.6329
2019-12-14_06:00:00	2019-12-14 16:00:03	0	24.42	9.44	0.02	0	0.01	292.96	-3.64	-0.61	19.81	3.69076	80.4868	18	22	2.5	138.5	34.6	675																73.2736	1552.36			4.7961	7.7284			1.41791	4.30462
2019-12-14_07:00:00	2019-12-14 17:00:03	0	23.8	9.36	0.02	0	0.01	292.9	-2.08	2.72	19.75	3.42415	142.595	16.8	21.7	2.5	141.1	30.1	974																55.3536	1654.86			3.8025	9.8596			0.854052	3.2694
2019-12-14_08:00:00	2019-12-14 18:00:03	0	22.99	9.29	0.03	0	0.01	292.98	-1.35	5.38	19.83	5.54679	165.914	22.5	21.1	2.6	151.5	29.1	575																174.504	1228.5			1.6129	13.3956			8.68358	16.2473
2019-12-14_09:00:00	2019-12-14 19:00:03	0	25.74	10.53	0.03	0	0.01	292.91	-1.86	7.16	19.76	7.39765	165.438	22.5	20.4	2.5	145.9	28.4	467																143.281	1143.12			0.4096	19.6249			23.987	33.4275
2019-12-14_10:00:00	2019-12-14 20:00:03	0	32.6	12.16	0.03	0	0	292.19	-4.14	7.6	19.04	8.65446	151.421	18.1	20.2	2.3	131.7	34.9	535																35.2836	1338.1			1.3456	28.6225			40.3791	46.7645
2019-12-14_11:00:00	2019-12-14 21:00:03	0	33.54	12.26	0.01	0	0	291.7	-4.59	6.54	18.55	7.98997	144.937	19.1	20.2	2.1	130.2	32.4	459																46.7856	1258.83			2.7225	34.1056			34.6918	35.6884
2019-12-14_12:00:00	2019-12-14 22:00:03	0	32.35	12.36	0.01	0	0	291.68	-3.41	5.19	18.53	6.21001	146.694	20.6	19.8	1	202.9	28.8	533																67.8976	1147.85			1.6129	39.1876			27.1442	27.1442
2019-12-14_13:00:00	2019-12-14 23:00:03	0	26.66	10.61	0.01	0	0	291.74	-2.91	4.16	18.59	5.07678	145.026	14.9	18.9	1.4	252.4	21.2	703																18.4041	1708.17			0.0961	50.41			13.5187	13.5187
2019-12-14_14:00:00	2019-12-15 00:00:03	0	22.77	9.2	0.01	0	0	291.74	-2.92	3.09	18.59	4.25141	136.62	13.9	18.7	1.2	261.8	22.1	740																22.09	1913.19			0.0121	53.29			9.31111	9.31111
2019-12-14_15:00:00	2019-12-15 01:00:03	0	21.57	8.83	0	0	0	291.74	-2.58	2.43	18.59	3.54419	133.285	9.1	18.8	1.2	251.4	20.7	648																0.0729	2392.19			0.0441	51.84			5.49524	5.49524
2019-12-14_16:00:00	2019-12-15 02:00:03	0	21.92	9.09	0	0	0	291.63	-2.39	1.94	18.48	3.07826	129.067	8.1	18.8	1.1	251.1	18	614																0.9801	2465.12			0.1024	53.4361			3.91352	3.91352
2019-12-14_17:00:00	2019-12-15 03:00:03	0	22.65	9.49	0	0	0	291.55	-1.97	1.33	18.4	2.37693	124.024	12.7	19	0.2	303.3	19.3	681																10.3041	1993.62			0.36	51.6961			4.73903	4.73903
2019-12-14_18:00:00	2019-12-15 04:00:03	0	22.76	9.58	0	0	0	291.56	-1.77	0.76	18.41	1.92627	113.238	12.8	18.7	0.4	257.8	21.1	634																10.3684	1976.69			0.0841	55.9504			2.32949	3.20315
2019-12-14_19:00:00	2019-12-15 05:00:03	0	22.51	9.46	0	0	0.01	291.68	-1.65	-0.27	18.53	1.67194	80.7068	15.7	18.7	0.5	260	18.1	734																38.9376	1737.22			0.0289	54.1696			1.37346	3.77935
2019-12-14_20:00:00	2019-12-15 06:00:03	0	22.39	9.24	0	0	0.01	291.67	-1.12	-2.05	18.52	2.336	28.6497	18.8	18.8	0.4	245.3	19.5	604																91.3936	1505.44			0.0784	52.8529			3.7481	3.7481
2019-12-14_21:00:00	2019-12-15 07:00:03	0	21.8	8.98	0.01	0	0.01	291.99	-0.83	-3.6	18.84	3.69444	12.9831	13.5	20.3	0.4	358.4	24.6	535																20.4304	1967.81			2.1316	29.7025			10.8533	10.8533
2019-12-14_22:00:00	2019-12-15 08:00:03	0	21.43	9.23	0.05	0	0.01	292.58	-1.33	-3.79	19.43	4.01659	19.3373	7.5		1.6	65	32.9	549																2.9929	2511.01			377.525	633.026			5.83991	5.83991
2019-12-14_23:00:00	2019-12-15 09:00:03	0	22.13	9.28	0.05	0	0.01	292.95	-3.18	-4.09	19.8	5.18078	37.8654		22.3	1.8	68.2		628																86.1184	3313.15			6.25	6.25			11.4297	11.4297
2019-12-15_00:00:00	2019-12-15 10:00:03	0	22.73	9.11	0.03	0	0.01	292.89	-5.06	-5.38	19.74	7.38566	43.2445		22.9	2.5	55.2		617																82.9921	3332.75			9.9856	9.9856			23.8697	33.289
2019-12-15_01:00:00	2019-12-15 11:00:03	0	0.67	0.05	0	0	0	294.23	-5.08	-3.82	21.08	6.35601	53.0581	-0.1	23.1	3.1	51.4		410																0.0225	4474.27			4.0804	4.0804			10.6016	28.5157
2019-12-15_02:00:00	2019-12-15 12:00:03	0	2.36	0.56	0	0	0	293.87	-6.53	-6.08	20.72	8.92229	47.0439	13.6	23.1	3.1	38.7		516																170.042	2775.18			5.6644	5.6644			33.8991	62.5095
2019-12-15_03:00:00	2019-12-15 13:00:03	0	4.34	1.29	0.01	0	0	293.86	-6.59	-6.12	20.71	8.99347	47.1179	17.3	23.4	2.7	31.3		631																256.32	2328.06			7.2361	7.2361			39.6078	57.418
2019-12-15_04:00:00	2019-12-15 14:00:03	0	7.31	2.81	0.07	0	0.01	294.26	-5.56	-6.16	21.11	8.29814	42.0694	18.1	23.9	2.6	45.8		682																233.784	2109.56			7.7841	7.7841			32.4688	45.9975
2019-12-15_05:00:00	2019-12-15 15:00:03	0	13.29	8.67	0.43	0	0.01	294.96	-4.67	-6.38	21.81	7.90654	36.2033	17.9	23.7	2.2	44		1081																85.1929	1621.67			3.5721	3.5721			32.5645	35.8865
2019-12-15_06:00:00	2019-12-15 16:00:03	0	26.23	20.28	1.12	0	0.01	295.76	-4.41	-6.69	22.61	8.01275	33.3927	16.3	24.3	2	62		781																15.8404	915.668			2.8561	5.3824			36.1532	36.1532
2019-12-15_07:00:00	2019-12-15 17:00:03	0	23.83	17.76	0.96	0	0.01	296.13	-3.41	-5.94	22.98	6.84921	29.8591	23.5	23.3	1.7	57		625																32.9476	654.336			0.1024	2.8561			26.5144	26.5144
2019-12-15_08:00:00	2019-12-15 18:00:03	0	23.7	17.51	0.95	0	0.01	296.19	-3.25	-6.05	23.04	6.86768	28.2444	17.7	23.1	1.7	49.1																		0.0361	1000.46			0.0036	2.4025			26.7049	26.7049
2019-12-15_09:00:00	2019-12-15 19:00:03	0	57.34	48.08	2.8	0.01	0.02	296.24	-0.61	-4.87	23.09	4.90805	7.13958	18.1	22.9	1	56.6		478																898.8	898.8			0.0361	1.96			15.2729	15.2729
2019-12-15_10:00:00	2019-12-15 20:00:03	0	101.89	88.35	5.21	0.02	0.02	296.88	2.35	-3.49	23.73	4.20745	326.046	18.4	22.4	0.3	21		792																4893	4893			1.7689	2.3716			15.2681	15.2681
2019-12-15_11:00:00	2019-12-15 21:00:03	0	57.71	49.5	2.89	0.01	0.02	297.28	4.2	-0.51	24.13	4.23085	276.923	10.1	22.3	0.7	234.8		906																1552.36	1552.36			3.3489	3.3856			12.4669	12.4669
2019-12-15_12:00:00	2019-12-15 22:00:03	0	5.92	4.23	0.24	0	0.01	297.26	4.81	1.68	24.11	5.09495	250.747	19.2	23	1.3	230.9		792																224.101	1884.43			1.2321	6.3504			14.4016	14.4016
2019-12-15_13:00:00	2019-12-15 23:00:03	0	5.49	3.77	0.21	0	0.01	296.72	4.37	3.84	23.57	5.81743	228.694	23.5	22.8	0.5	214		667																389.273	1565.78			0.5929	3.1684			28.2751	28.2751
2019-12-15_14:00:00	2019-12-16 00:00:03	0	8.08	5.25	0.25	0	0.01	295.71	3.77	5.17	22.56	6.39858	216.1	28.5	22.1	0.1	338.8		758																540.562	1094.95			0.2116	0.2116			39.6721	39.6721
2019-12-15_15:00:00	2019-12-16 01:00:03	0	7.65	4.31	0.17	0	0.01	294.87	4.22	5.92	21.72	7.27013	215.483	23.6	21.4	0.4	227.2		767																372.104	1515.54			0.1024	2.1609			47.1987	47.1987
2019-12-15_16:00:00	2019-12-16 02:00:03	0	6.89	3.61	0.12	0	0	293.94	4.04	6.96	20.79	8.04756	210.133	28.9	21.3	1.6	212.9		806																639.584	1178.55			0.2601	6.25			41.571	41.571
2019-12-15_17:00:00	2019-12-16 03:00:03	0	7.06	3.31	0.08	0	0	293.12	4.79	8.37	19.97	9.6437	209.782	52	19.9	3.9	178.4		918																2370.72	2370.72			0.0049	22.2784			32.9901	88.8816
2019-12-15_18:00:00	2019-12-16 04:00:03	0	8.51	3.71	0.06	0	0	292.29	5	8.93	19.14	10.2345	209.245	42.5	19	2.8	181.2		962																1504.66	1504.66			0.0196	41.6025			55.2717	79.5396
2019-12-15_19:00:00	2019-12-16 05:00:03	0	11.29	4.37	0.05	0	0	291.95	4.55	9.12	18.8	10.192	206.515	25.4	18.7	3	175.9		1017																442.261	1374.18			0.01	50.2681			51.7249	82.3738
2019-12-15_20:00:00	2019-12-16 06:00:03	0	24.14	7.78	0.02	0	0	292.01	1.76	10.04	18.86	10.1931	189.943	18.8	18.8	2.9	177.6		1567																121.44	1620.87			0.0036	48.0249			53.1892	80.5882
2019-12-15_21:00:00	2019-12-16 07:00:03	0	22.95	7.11	0.01	0	0	292	0.83	9.46	18.85	9.49634	185.014	17.1	19.2	2.9	171.3		1480																99.8001	1817.32			0.1225	42.7716			43.5117	68.5641
2019-12-15_22:00:00	2019-12-16 08:00:03	0	20.13	6.29	0	0	0	292	0.14	9.34	18.85	9.34105	180.859	15.1	20.4	3.3	165.1		1345																77.6161	2065.7			2.4025	28.5156			36.4943	72.6765
2019-12-15_23:00:00	2019-12-16 09:00:03	0	15.31	4.82	0	0	0	292.1	-0.52	9.49	18.95	9.50424	176.864	17.7	21.1	3.3	162.2		1297																165.894	1964.26			4.6225	20.6116			38.4925	75.4854
2019-12-16_00:00:00	2019-12-16 10:00:03	0	12.68	4.04	0.01	0	0	292.04	-1.63	9.91	18.89	10.0432	170.66	14.7	21.3	3.5	146.7		1327																113.636	2313.61			5.8081	19.36			42.8129	88.8713
2019-12-16_01:00:00	2019-12-16 11:00:03	0	10.39	3.47	0.02	0	0	291.97	-2.01	10.91	18.82	11.0936	169.561	15.1	21.7	3.5	147.4		2750																135.257	2329.99			8.2944	16.5649			57.6629	109.78
2019-12-16_02:00:00	2019-12-16 12:00:03	0	13.09	4.24	0.01	0	0	291.74	-2.45	10.92	18.59	11.1915	167.354	18.1	21.9	3.8	156.7		1413																192.1	1980.25			10.9561	16.81			54.6338	118.276
2019-12-16_03:00:00	2019-12-16 13:00:03	0	18.43	6.12	0	0	0	291.53	-3.09	10.46	18.38	10.9069	163.542	20.1	21.2	4.1	157.1		725																195.44	1649.98			7.9524	25.1001			46.3334	118.611
2019-12-16_04:00:00	2019-12-16 14:00:03	0	28.63	9.59	0	0	0	291.45	-3.64	9.78	18.3	10.4354	159.585	17.7	21.1	3.8	157.7		535																65.7721	1564.2			7.84	26.9361			44.0288	102.403
2019-12-16_05:00:00	2019-12-16 15:00:03	0	37.95	12.83	0	0	0	291.53	-3.61	9.03	18.38	9.72487	158.209	12.4	21.1	4.1	162.8	17.7	445																0.1849	1731.39			7.3984	26.1121			31.6391	94.2621
2019-12-16_06:00:00	2019-12-16 16:00:03	0	34.15	11.61	0	0	0	291.65	-2.96	8.1	18.5	8.6239	159.926	16.2	20.5	4	167.3	28.2	530																21.0681	1523.34			4	31.2481			21.3804	72.3843
2019-12-16_07:00:00	2019-12-16 17:00:03	0	33.74	11.51	0	0	0	291.7	-2.16	7.65	18.55	7.94909	164.233	7.7	19.8	3.3	161.3	25.3	559																14.5161	2268.62			1.5625	38.9376			21.6141	50.881
2019-12-16_08:00:00	2019-12-16 18:00:03	0	30.75	10.29	0	0	0	291.65	-1.83	7.77	18.5	7.98259	166.747	3	19.5	3	160.3	22.5	535																53.1441	2867.6			1	43.4281			24.8262	47.1501
2019-12-16_09:00:00	2019-12-16 19:00:03	0	26.39	8.6	0	0	0	291.6	-1.49	7.24	18.45	7.39173	168.371	2.9	19.2	2.5	163.2	19	401																32.49	3062.52			0.5625	48.1636			23.929	33.3591
2019-12-16_10:00:00	2019-12-16 20:00:03	0	27.77	9.18	0	0	0	291.53	-1.56	6.57	18.38	6.75267	166.643	2.6	18.9	2.1	159.8	20.3	302																43.2964	3031.6			0.2704	53.4361			21.6473	22.436
2019-12-16_11:00:00	2019-12-16 21:00:03	0	29.78	9.95	0	0	0	291.48	-1.29	5.98	18.33	6.11756	167.827	7	18.6	1.8	163.5	19.9	259																8.7025	2489.01			0.0729	58.6756			18.6413	18.6413
2019-12-16_12:00:00	2019-12-16 22:00:03	0	29.74	10.01	0	0	0	291.42	-0.93	5.47	18.27	5.5485	170.351	6.7	18.5	1.7	162.5	17.7																	10.9561	2513.02			0.0529	61.1524			14.8109	14.8109
2019-12-16_13:00:00	2019-12-16 23:00:03	0	29.84	10.08	0	0	0	291.26	-0.34	4.66	18.11	4.67239	175.827	8.7	18.3	1	178.7	19	173																1.9044	2309.76			0.0361	66.9124			13.4864	13.4864
2019-12-16_14:00:00	2019-12-17 00:00:03	0	30.91	10.45	0	0	0	291.09	-0.11	4.38	17.94	4.38138	178.561	6.5	17.9	1.1	242.9	19.7	240																15.6025	2489.01			0.0016	76.5625			10.7675	10.7675
2019-12-16_15:00:00	2019-12-17 01:00:03	0	31.58	10.67	0	0	0	290.8	0.82	3.37	17.65	3.46833	193.676	3.6	17.4	0.6	222	16.3	284																49.9849	2763.6			0.0625	91.0116			8.22731	8.22731
2019-12-16_16:00:00	2019-12-17 02:00:03	0	31.36	10.53	0.01	0	0.01	290.45	1.64	2.74	17.3	3.19331	210.902	1.9	16.3	1	239.3	13.8	178																74.4769	2960.45			1	120.78			4.81059	4.81059
2019-12-16_17:00:00	2019-12-17 03:00:03	0	30.75	10.32	0.02	0	0.01	290.19	1.97	2.66	17.04	3.31006	216.524	4.5	15.5	1	231.2	12.2	133																33.8724	2706.08			2.3716	145.202			5.33638	5.33638
2019-12-16_18:00:00	2019-12-17 04:00:03	0	29.95	10.14	0.03	0	0.01	289.99	2.26	2.73	16.84	3.54408	219.619	6	15	1	234.6	12	132																17.1396	2570.49			3.3856	162.562			6.47234	6.47234
2019-12-16_19:00:00	2019-12-17 05:00:03	0	29.46	10.05	0.03	0	0.01	289.88	2.48	2.17	16.73	3.29535	228.814	10.5	14.3	0.3	256.8	12.7	76																0.2025	2142.76			5.9049	183.874			8.97209	8.97209
2019-12-16_20:00:00	2019-12-17 06:00:03	0	29.03	9.94	0.03	0	0.01	289.92	2.05	1.72	16.77	2.67599	230.002	8.7	15.3	0.7	235.6	16.8	96																1.5376	2323.24			2.1609	156.75			3.90452	3.90452
2019-12-16_21:00:00	2019-12-17 07:00:03	0	28.93	10.12	0.03	0	0.01	290.25	0.84	1.86	17.1	2.04088	204.304	3.3	18.3	1	242.2	19.8	77																46.5124	2853.7			1.44	84.4561			1.08344	1.15588
2019-12-16_22:00:00	2019-12-17 08:00:03	0	29.02	10.33	0.04	0	0.01	290.52	-0.5	1.57	17.37	1.6477	162.335	5.7	19.5	0.9	133.2	28.6	162																21.4369	2581.66			4.5369	59.5984			0.559048	2.45958
2019-12-16_23:00:00	2019-12-17 09:00:03	0	29.43	10.71	0.05	0	0.01	290.55	-1.97	1.11	17.4	2.26119	119.399	7.3	20.3	2	112.4	21.2	179																11.6281	2384.37			8.41	47.4721			0.0682225	0.0682225
2019-12-17_00:00:00	2019-12-17 10:00:03	0	29.03	10.81	0.06	0	0	290.48	-2.69	0.93	17.33	2.84623	109.071	6.5	20.3	2.4	98.2	18.2	137																18.5761	2453.22			8.8209	48.4416			0.199117	1.27741
2019-12-17_01:00:00	2019-12-17 11:00:03	0	27.53	10.43	0.06	0	0	290.62	-3.18	0.48	17.47	3.21602	98.5835	1.8	20.9	2	79.3	14.5	115																74.4769	2982.25			11.7649	38.6884			1.47871	1.47871
2019-12-17_02:00:00	2019-12-17 12:00:03	0	25.52	9.49	0.04	0	0	290.86	-3.69	0.09	17.71	3.6911	91.397	5.5	20.9	2.6	79.5	13.4	187																15.9201	2688.42			10.1761	35.7604			1.19049	4.73105
2019-12-17_03:00:00	2019-12-17 13:00:03	0	21.85	7.94	0.01	0	0	291.08	-4.18	-0.44	17.93	4.20309	83.9911	4.3	21.4	2.5	71.7	14.9	229																13.2496	2981.16			12.0409	27.6676			2.90053	6.69306
2019-12-17_04:00:00	2019-12-17 14:00:03	0	19.1	6.95	0	0	0	291.34	-4.35	-1.07	18.19	4.47967	76.181	1.3	21.5	2.3	73.1	12.7	944																31.9225	3432.79			10.9561	24.01			4.75094	7.09511
2019-12-17_05:00:00	2019-12-17 15:00:03	0	17.63	6.47	0	0	0	291.65	-4.32	-1.43	18.5	4.55053	71.6846	3.6	21.5	2.4	67.6	12.4	1659																8.2369	3222.83			9	21.0681			4.62477	8.03455
2019-12-17_06:00:00	2019-12-17 16:00:03	0	16.6	6.12	0	0	0	291.94	-4.04	-1.8	18.79	4.42285	65.985	4.9	21.3	2.3	62.3	11.2	635																1.4884	3115.87			6.3001	20.25			4.50649	6.79567
2019-12-17_07:00:00	2019-12-17 17:00:03	0	16.07	5.9	0	0	0	292.22	-3.79	-2.34	19.07	4.45418	58.3084	3.6	21.3	1.9	59.1	13.6	524																5.29	3287.88			4.9729	17.8084			6.52382	6.52382
2019-12-17_08:00:00	2019-12-17 18:00:03	0	15.82	5.82	0	0	0	292.4	-3.32	-2.53	19.25	4.17412	52.691	-0.2	21	1.8	52.7	15.6	183																36.2404	3747.89			3.0625	18.8356			5.63646	5.63646
2019-12-17_09:00:00	2019-12-17 19:00:03	0	15.62	5.73	0	0	0	292.58	-2.85	-2.58	19.43	3.84433	47.8467	4.4	20.3	1.3	50.1	18.9	146																1.7689	3216.02			0.7569	23.6196			6.47363	6.47363
2019-12-17_10:00:00	2019-12-17 20:00:03	0	15.37	5.63	0	0	0	292.7	-2.61	-2.46	19.55	3.5866	46.6948	8	19.9	0.9	18.6	25.1	93																5.6169	2831.3			0.1225	26.4196			7.21782	7.21782
2019-12-17_11:00:00	2019-12-17 21:00:03	0	15.13	5.55	0	0	0.01	292.76	-2.33	-2.31	19.61	3.28101	45.2471	1.7	19.3	0.8	329.4	15.7	86																14.8225	3550.97			0.0961	32.2624			6.15539	6.15539
2019-12-17_12:00:00	2019-12-17 22:00:03	0	15	5.51	0	0	0.01	292.78	-1.79	-3.09	19.63	3.57102	30.0833	1.3	18.4	0.5	329.2	12.7	94																17.7241	3603.6			1.5129	43.0336			9.43118	9.43118
2019-12-17_13:00:00	2019-12-17 23:00:03	0	15.03	5.5	0	0	0.01	292.8	-0.95	-3.85	19.65	3.96548	13.8611	2.7	18.6	0.9	358.8	11.6	104																7.84	3438.65			1.1025	40.1956			9.39714	9.39714
2019-12-17_14:00:00	2019-12-18 00:00:03	0	15.7	5.52	0	0	0.01	292.72	0.17	-4.5	19.57	4.50321	357.837	0.7	18.3	1.4	2.3	11	86																23.2324	3674.78			1.6129	45.1584			9.62991	9.62991
2019-12-17_15:00:00	2019-12-18 01:00:03	0	18.28	5.87	0.01	0.01	0.02	292.25	1.87	-5	19.1	5.33825	339.494	2.3	18.1	1.1	358.5	12.1	74																12.7449	3442.17			1	54.6121			17.9628	17.9628
2019-12-17_16:00:00	2019-12-18 02:00:03	0	22.64	8.84	0.17	0.01	0.02	291.33	3.69	-4.08	18.18	5.50114	317.873	0.4	18.2	1.7	356.5	12.9	90																71.2336	3317.76			0.0004	67.4041			14.4486	14.4486
2019-12-17_17:00:00	2019-12-18 03:00:03	0	32.83	18.98	0.74	0.01	0.02	291.04	4.19	-3.93	17.89	5.74465	313.166	0.6	18.4	1.7	349.9	13.6	102																337.824	2233.51			0.2601	68.89			16.3592	16.3592
2019-12-17_18:00:00	2019-12-18 04:00:03	0	38.31	24.88	1.06	0.01	0.01	290.98	4.35	-4.21	17.83	6.05364	314.063	5.5	18	1.2	358	12.8	120																375.584	1329.33			0.0289	76.7376			23.5579	23.5579
2019-12-17_19:00:00	2019-12-18 05:00:03	0	37.1	24.58	1.04	0.01	0.01	291	4.29	-4.33	17.85	6.09533	315.266	8.1	16.5	0.3	258.2	12.7	297																271.59	1166.91			1.8225	104.858			33.5858	33.5858
2019-12-17_20:00:00	2019-12-18 06:00:03	0	33.62	22.11	0.91	0.01	0.01	291.42	3.14	-4.46	18.27	5.45447	324.853	8.4	16.8	0.5	345.4	15	560																187.964	1319.87			2.1609	90.6304			24.5467	24.5467
2019-12-17_21:00:00	2019-12-18 07:00:03	0	26.2	16.56	0.61	0	0.01	292.53	2.28	-5.01	19.38	5.50441	335.53	4.4	19.9	1.9	1.4	27.7	490																147.866	2104.97			0.2704	28.1961			12.9918	12.9918
2019-12-17_22:00:00	2019-12-18 08:00:03	0	21.13	12.69	0.42	0	0.01	293.83	0.83	-5.5	20.68	5.56227	351.418	14.8	21.6	2.4	10.3	33.2	153																4.4521	1548.42			0.8464	5.3361			9.99998	14.7938
2019-12-17_23:00:00	2019-12-18 09:00:03	0	19.31	10.45	0.3	0	0.02	294.49	-1.4	-5.46	21.34	5.63663	14.3815	19.6	23.7	2	16.1	42.7	207																83.7225	1353.5			5.5696	5.5696			13.2251	13.2251
2019-12-18_00:00:00	2019-12-18 10:00:03	0	18.95	8.61	0.18	0.01	0.03	294.48	-4.1	-5.2	21.33	6.62193	38.2545	30.5	23.5	3.2	56.8	71.8	238																479.172	768.953			4.7089	4.7089			11.7096	32.5577
2019-12-18_01:00:00	2019-12-18 11:00:03	0	18.87	7.71	0.09	0	0.02	293.72	-5.88	-6.05	20.57	8.43664	44.1837	22.4	23.2	3.6	50.4	41.4	195																215.796	1349.09			6.9169	6.9169			23.3931	62.7365
2019-12-18_02:00:00	2019-12-18 12:00:03	0	20.22	7.84	0.05	0	0.01	293.62	-6.69	-6.82	20.47	9.55345	44.4488	4.7	23.5	3.1	47.5	28.1	170																9.8596	2948.49			9.1809	9.1809			41.6471	72.8881
2019-12-18_03:00:00	2019-12-18 13:00:03	0	21.44	7.9	0.02	0	0.01	293.56	-7.25	-7.24	20.41	10.246	45.0397	-0.2	23.8	3.7	44.7	28.8	208																65.61	3497.54			11.4921	11.4921			42.8499	96.6285
2019-12-18_04:00:00	2019-12-18 14:00:03	0	21.3	7.71	0.01	0	0.01	293.66	-7.39	-8.12	20.51	10.9794	42.3054	12.3	23.9	3.9	39.5	53.1	557																21.0681	2193.05			11.4921	11.4921			50.1174	115.85
2019-12-18_05:00:00	2019-12-18 15:00:03	0	21.16	7.83	0.01	0	0.01	294.02	-7.1	-8.75	20.87	11.2682	39.057	21	23.3	4.9	44.4	41.5	922																173.449	1444.76			5.9049	5.9049			40.5541	145.256
2019-12-18_06:00:00	2019-12-18 16:00:03	0	21.55	8.07	0.01	0	0.01	294.43	-6.71	-9.39	21.28	11.5411	35.5493	18.8	23.3	4.6	38.3	31.2	820																115.133	1597.6			4.0804	4.0804			48.1784	144.602
2019-12-18_07:00:00	2019-12-18 17:00:03	0	22.44	8.36	0.01	0	0.01	294.99	-5.38	-9	21.84	10.4854	30.8701	10.5	23.1	3.8	34.4	41.5	951																4.5796	2302.08			1.5876	1.5876			44.6951	103.417
2019-12-18_08:00:00	2019-12-18 18:00:03	0	23.19	8.58	0.01	0	0.01	295.27	-4.22	-7.96	22.12	9.00944	27.9304	8.4	22.9	2.9	34.1	39.1	1133																0.0324	2486.02			0.6084	0.6084			37.3253	60.7377
2019-12-18_09:00:00	2019-12-18 19:00:03	0	22.14	8.2	0.02	0	0.01	295.31	-3.08	-6.8	22.16	7.46501	24.3678	10.1	22.3	2.4	39.3	45.3	1681																3.61	2356.13			0.0196	0.0196			25.6543	33.0511
2019-12-18_10:00:00	2019-12-18 20:00:03	0	21.81	8.04	0.02	0	0.01	295.12	-2.27	-6.53	21.97	6.91331	19.1689	10.3	22	1.2	30.7	31.6	805																5.1076	2352.25			0.0009	0.3844			32.6419	32.6419
2019-12-18_11:00:00	2019-12-18 21:00:03	0	22.13	8.11	0.03	0	0.02	294.96	-1.39	-7.07	21.81	7.20535	11.1229	8.3	21.9	1.2	37.5	26.1	309																0.0361	2543.18			0.0081	0.7744			36.0642	36.0642
2019-12-18_12:00:00	2019-12-18 22:00:03	0	21.37	7.82	0.04	0.01	0.02	294.92	0.08	-6.72	21.77	6.72048	359.318	9.4	21.6	1.5	59.5	35.5	320																2.4964	2462.14			0.0289	1.4884			27.2534	27.2534
2019-12-18_13:00:00	2019-12-18 23:00:03	0	21.53	8.69	0.12	0.01	0.02	294.95	0.27	-7.02	21.8	7.02519	357.797	7.4	21.3	1.4	57.2	38.3	752																1.6641	2575.56			0.25	2.2201			31.6428	31.6428
2019-12-18_14:00:00	2019-12-19 00:00:03	0	24.49	12.06	0.34	0.01	0.03	294.94	0.47	-7.55	21.79	7.56461	356.438	3.9	20.9	1	41.9	34.4	404																66.5856	2588.77			0.7921	3.61			43.0942	43.0942
2019-12-18_15:00:00	2019-12-19 01:00:03	0	30.35	18.45	0.71	0.01	0.03	294.71	0.38	-7.38	21.56	7.38978	357.052	5	20.8	1.2	49.6	36.9	324																180.902	1882.69			0.5776	4.9729			38.3133	38.3133
2019-12-18_16:00:00	2019-12-19 02:00:03	0	37.88	25.51	1.09	0.01	0.03	294.5	1.09	-7.17	21.35	7.25238	351.356	5.6	20.6	0.7	58	37.4	400																396.408	1276.63			0.5625	6.9696			42.9337	42.9337
2019-12-18_17:00:00	2019-12-19 03:00:03	0.01	47.99	34.92	1.59	0.01	0.03	294.43	1.82	-6.92	21.28	7.15533	345.265	9.6	19.1	0.2	225.3	31.3	325																641.102	641.102			4.7524	17.7241			48.3767	48.3767
2019-12-18_18:00:00	2019-12-19 04:00:03	0.01	61.02	47.48	2.25	0.01	0.03	294.53	2.46	-5.65	21.38	6.16231	336.472	7.2	19	0.4	184.1	31.3	332																1622.48	1622.48			5.6644	17.7241			33.2042	33.2042
2019-12-18_19:00:00	2019-12-19 05:00:03	0.01	70.37	57.34	2.78	0.01	0.03	294.84	1.96	-5.07	21.69	5.43567	338.864	14.7	18.5	0.5	250.2	48.7	417																1818.17	1818.17			10.1761	19.36			24.3608	24.3608
2019-12-18_20:00:00	2019-12-19 06:00:03	0.02	71.08	59.41	2.93	0.01	0.02	295.81	2	-4.63	22.66	5.0435	336.637	39.2	19.2	0.5	196.3	122.1	422																408.444	1009.33			11.9716	11.9716			20.6434	20.6434
2019-12-18_21:00:00	2019-12-19 07:00:03	0.02	64.82	54.82	2.73	0.01	0.02	296.76	1.54	-4.5	23.61	4.75622	341.108	145.8	23.8	0.4	132.7	439.1	418																8277.36	17897.1			0.0361	7.9524			18.9766	18.9766
2019-12-18_22:00:00	2019-12-19 08:00:03	0.02	57.34	48.48	2.41	0.01	0.01	298.78	3.12	-3.87	25.63	4.97105	321.124	377.7	30.5	1.3	108	494.7	376																108386	129125			23.7169	133.172			13.4766	13.4766
2019-12-18_23:00:00	2019-12-19 09:00:03	0.01	45.74	38.58	1.86	0.01	0.01	300.6	3.8	-2.04	27.45	4.31296	298.229	380.3	34.5	1.4	77.2	259.7	371																116773	123932			49.7025	301.37			8.48532	8.48532
2019-12-19_00:00:00	2019-12-19 10:00:03	0.01	31.53	26.21	1.15	0	0.01	301.75	3.17	-0.21	28.6	3.17695	273.79	256.9	37.9	0.5	20.1	211.1	333																53217.9	53217.9			86.49	480.048			7.16605	7.16605
2019-12-19_01:00:00	2019-12-19 11:00:03	0.07	28.12	22.64	0.94	0	0.01	302.11	1.61	1.32	28.96	2.08195	230.652	153.1	41	3.6	271	38.4	417																17019.8	17019.8			144.962	643.637			2.30449	2.45219
2019-12-19_02:00:00	2019-12-19 12:00:03	0.21	33.19	26	1.11	0.01	0.02	302.45	-0.29	-0.15	29.3	0.326497	62.6503		37.4	1.5	73.1	257.3	806																676	1667.91			65.61	488.852			1.37711	5.24183
2019-12-19_03:00:00	2019-12-19 13:00:03	0.24	35.52	27.5	1.18	0.01	0.02	300.89	0.07	-1.8	27.74	1.80136	357.773		32.7	1.4	78.5	226.8	1121																756.25	1547.64			24.6016	251.223			0.16109	0.836565
2019-12-19_04:00:00	2019-12-19 14:00:03	0.26	35.47	27.44	1.2	0.01	0.01	301	0.68	-2.56	27.85	2.64877	345.124		28.8	2.8	174	191.6	3244																752.954	1552.36			0.9025	145.444			0.0228695	1.77628
2019-12-19_05:00:00	2019-12-19 15:00:03	0.28	37.2	28.73	1.34	0.01	0.01	302.47	0.92	-1.39	29.32	1.66688	326.501	95.4	27.2	3.5	179.8	30.6	9711																4444.89	4444.89			4.4944	142.325			3.36032	3.36032
2019-12-19_06:00:00	2019-12-19 16:00:03	0.06	47.98	35.89	1.4	0.01	0.01	297.71	3.65	12.6	24.56	13.118	196.155	58.3	27.5	3.9	178	22.1	23727																502.208	748.022			8.6436	55.8009			84.9719	166.462
2019-12-19_07:00:00	2019-12-19 17:00:03	0.01	32.18	19.14	0.5	0	0.01	296.26	3.01	9.75	23.11	10.204	197.156	33.6	27	4.4	172.3	32.8	18933																209.092	209.092			15.1321	30.4704			33.687	109.999
2019-12-19_08:00:00	2019-12-19 18:00:03	0.04	30.3	16.83	0.37	0	0.01	295.63	1.95	9.06	22.48	9.26748	192.147	18.7	25.1	3.1	171.2	54.9	9403																3.4969	980.316			6.8644	8.9401			38.0378	68.0868
2019-12-19_09:00:00	2019-12-19 19:00:03	0.12	34.3	17.55	0.33	0	0.01	294.98	1.74	9.74	21.83	9.8942	190.129	6.5	23.9	1.7	189.8	29.9	7479																122.103	1830.98			4.2849	4.2849			67.1449	67.1449
2019-12-19_10:00:00	2019-12-19 20:00:03	0.19	38.97	19.93	0.41	0	0.01	294.56	1.28	9.24	21.41	9.32824	187.887	5.5	23.2	1.2	210.8	17.6	1272																208.225	1714.79			3.2041	3.2041			66.0682	66.0682
2019-12-19_11:00:00	2019-12-19 21:00:03	0.26	57.02	36.91	1.39	0	0.01	294.16	1.83	7.95	21.01	8.1579	192.963		22.5	1.1	196.1	37.1	7120																1362.35	1362.35			2.2201	2.2201			49.814	49.814
2019-12-19_12:00:00	2019-12-19 22:00:03	0.3	116.95	92.37	4.52	0.01	0.01	293.81	2.35	7.84	20.66	8.18463	196.686	4.5	21.5	1.6	170.5	59.1	7146																7721.14	7721.14			0.7056	5.9049			43.3573	43.3573
2019-12-19_13:00:00	2019-12-19 23:00:03	0.28	127.27	103.79	5.17	0.01	0.01	293.57	2.54	7.78	20.42	8.18413	198.081	3.3	20.8	0.9	225.4	45.6	5722																10098.2	10098.2			0.1444	11.3569			53.0586	53.0586
2019-12-19_14:00:00	2019-12-20 00:00:03	0.24	101.1	80.91	3.9	0.01	0.01	293.31	2.84	7.41	20.16	7.9356	200.97	8.3	20.2	1.4	182.1	65.3	1129																5272.21	5272.21			0.0016	17.8929			42.714	42.714
2019-12-19_15:00:00	2019-12-20 01:00:03	0.21	69.88	54.03	2.46	0.01	0.01	293.3	2.67	6.1	20.15	6.65875	203.639	2.6	19.7	1.5	184.8	58.8	558																2645.04	2645.04			0.2025	22.4676			26.6127	26.6127
2019-12-19_16:00:00	2019-12-20 02:00:03	0.18	53.5	40.09	1.73	0.01	0.01	293.22	2.02	6	20.07	6.33091	198.607	8.6	19.2	0.9	209.2	42.8	488																991.62	991.62			0.7569	28.3024			29.4948	29.4948
2019-12-19_17:00:00	2019-12-20 03:00:03	0.16	45.74	33.39	1.38	0	0.01	292.98	1.17	6.54	19.83	6.64383	190.143	11.5	18.5	0.8	250.9	30.2	505																479.172	481.803			1.7689	39.1876			34.1504	34.1504
2019-12-19_18:00:00	2019-12-20 04:00:03	0.14	43.34	31.04	1.25	0	0.01	292.73	0.85	6.05	19.58	6.10942	187.997	12.7	17.7	0.7	241.3	31.3	368																336.356	533.61			3.5344	53.4361			29.2618	29.2618
2019-12-19_19:00:00	2019-12-20 05:00:03	0.13	41.76	29.42	1.15	0	0.01	292.49	0.89	5.39	19.34	5.46298	189.376	12.9	17.9	0.7	264.8	31.7	369																272.91	601.23			2.0736	54.0225			22.686	22.686
2019-12-19_20:00:00	2019-12-20 06:00:03	0.13	39.11	26.85	0.99	0	0.01	292.36	1.03	4.77	19.21	4.87994	192.185	18.7	17.8	0.1	254.6	37.2	788																66.4225	453.264			1.9881	57.4564			22.8478	22.8478
2019-12-19_21:00:00	2019-12-20 07:00:03	0.12	36.82	24.72	0.86	0	0.01	292.49	0.41	3.62	19.34	3.64314	186.462	12.7	19.9	1	126.9	41.8	860																144.48	865.536			0.3136	28.6225			6.98621	6.98621
2019-12-19_22:00:00	2019-12-20 08:00:03	0.11	34.55	22.54	0.72	0	0.01	292.54	-0.78	3.13	19.39	3.22572	166.007	12.2	21	1.4	113.2	41.1	516																106.916	1030.41			2.5921	17.64			3.33327	3.33327
2019-12-19_23:00:00	2019-12-20 09:00:03	0.1	32.18	20.11	0.56	0	0.01	292.18	-1.66	2.25	19.03	2.79609	143.581	14.9	21.6	1.5	92.7	35.4	693																27.1441	1013.15			6.6049	15.6816			1.67984	1.67984
2019-12-20_00:00:00	2019-12-20 10:00:03	0.1	28.28	16.59	0.35	0	0.01	291.72	-2.24	0.89	18.57	2.41033	111.669	18.9	22.8	1.3	76.2	33.9	700																5.3361	982.823			17.8929	17.8929			1.23284	1.23284
2019-12-20_01:00:00	2019-12-20 11:00:03	0.09	23.97	12.89	0.16	0	0.01	291.45	-2.78	-0.45	18.3	2.81619	80.8054	12.8	22.8	2.2	74.4	30.1	331																0.0081	1693.32			20.25	20.25			0.379684	0.810334
2019-12-20_02:00:00	2019-12-20 12:00:03	0.08	21.16	10.5	0.06	0	0.01	291.49	-3.28	-1.46	18.34	3.59026	66.0052	10.4	22.9	2.2	67.3	27.7	376																0.01	2110.48			20.7936	20.7936			1.93284	2.80316
2019-12-20_03:00:00	2019-12-20 13:00:03	0.07	20.35	9.78	0.04	0	0.01	291.94	-3.37	-2.26	18.79	4.05765	56.1534	5.6	22.9	2.2	60.8	29	619																17.4724	2648.13			16.8921	16.8921			3.45085	4.58665
2019-12-20_04:00:00	2019-12-20 14:00:03	0.06	20.01	9.5	0.03	0	0.01	292.37	-3.39	-2.9	19.22	4.46118	49.4545	4.2	23.2	2.5	57	25.8	1305																28.09	2823.86			15.8404	15.8404			3.84622	8.09503
2019-12-20_05:00:00	2019-12-20 15:00:03	0.06	20.33	9.55	0.03	0	0.01	292.82	-3.3	-4.02	19.67	5.201	39.3825	6.6	23.5	2.5	57.5	26.7	2663																8.7025	2569.48			14.6689	14.6689			7.2954	12.8522
2019-12-20_06:00:00	2019-12-20 16:00:03	0.06	21.5	10.01	0.03	0	0.01	293.16	-3.39	-4.57	20.01	5.69008	36.5679	6.9	23.6	2.8	52	20.5	1121																9.6721	2493			12.8881	12.8881			8.35256	19.1326
2019-12-20_07:00:00	2019-12-20 17:00:03	0.07	22.64	10.43	0.03	0	0.01	293.42	-3.32	-4.64	20.27	5.70544	35.5845	13.1	22.9	3.3	45.5	33.3	772																7.1289	1875.76			6.9169	6.9169			5.78612	23.9066
2019-12-20_08:00:00	2019-12-20 18:00:03	0.08	22.44	10.32	0.03	0	0.01	293.7	-3.06	-3.83	20.55	4.9023	38.6234	10	22.5	2.9	42.9	34.8	581																0.1024	2164.11			3.8025	3.8025			4.00919	13.5888
2019-12-20_09:00:00	2019-12-20 19:00:03	0.08	23.57	10.68	0.03	0	0.01	293.79	-4.21	-1.42	20.64	4.44303	71.3613	10.6	22	2.4	42.3	40.2	530																0.0064	2075.71			1.8496	3.8025			4.17396	7.43668
2019-12-20_10:00:00	2019-12-20 20:00:03	0.08	25.04	11.29	0.03	0	0.01	293.66	-4.4	-2.31	20.51	4.96952	62.3007	11.6	21.6	2.1	37.8	39.5	244																0.0961	1931.6			1.1881	6.1504			8.23413	8.72326
2019-12-20_11:00:00	2019-12-20 21:00:03	0.08	26.39	11.89	0.03	0	0.01	293.65	-3.1	-4.32	20.5	5.31718	35.663	13.2	21.2	1.1	354.7	23.5	205																1.7161	1743.06			0.49	8.3521			17.7846	17.7846
2019-12-20_12:00:00	2019-12-20 22:00:03	0.09	27.56	12.53	0.04	0	0.01	293.64	-2.28	-4.88	20.49	5.38635	25.0427	13.3	20.7	0.9	356.1	27	186																0.5929	1681.82			0.0441	11.56			20.1274	20.1274
2019-12-20_13:00:00	2019-12-20 23:00:03	0.1	27.3	12.66	0.06	0	0.01	293.68	-0.33	-6.4	20.53	6.4085	2.95178	12.4	20.7	1.3	329.7	23.5	161																0.0676	1745.57			0.0289	11.2896			26.0968	26.0968
2019-12-20_14:00:00	2019-12-21 00:00:04	0.11	27.53	12.64	0.08	0.01	0.02	293.81	0.6	-5.58	20.66	5.61217	353.863	8.8	20.3	0.5	339	17.4	185																14.7456	2061.16			0.1296	13.1769			26.1342	26.1342
2019-12-20_15:00:00	2019-12-21 01:00:04	0.12	28.36	13.48	0.12	0.01	0.03	293.73	0.72	-6.18	20.58	6.2218	353.355	12.3	20.4	0.9	355.3	24.4	199																1.3924	1685.92			0.0324	13.0321			28.3216	28.3216
2019-12-20_16:00:00	2019-12-21 02:00:04	0.13	29.58	15.49	0.2	0.01	0.02	293.98	2.99	-6.89	20.83	7.51081	336.541	8.7	19.7	1	342.3	25.6	239																46.1041	1819.02			1.2769	16.4836			42.3906	42.3906
2019-12-20_17:00:00	2019-12-21 03:00:04	0.15	31.65	18.34	0.32	0	0.01	294.1	3.4	-8.12	20.95	8.80309	337.28	7.1	19.8	1.5	352.2	25.1	236																126.338	1713.96			1.3225	14.7456			53.3351	53.3351
2019-12-20_18:00:00	2019-12-21 04:00:04	0.17	34.82	21.35	0.45	0	0.01	294.57	5.17	-6.58	21.42	8.36811	321.843	8.4	19.4	1	8.1	26.1	238																167.703	1375.67			4.0804	14.2129			54.2891	54.2891
2019-12-20_19:00:00	2019-12-21 05:00:04	0.19	38.35	25.13	0.66	0	0.01	294.86	4.48	-5.29	21.71	6.93214	319.739	11	19.8	2.1	356.3	35.4	215																199.657	943.104			3.6481	9.4864			23.3495	24.1684
2019-12-20_20:00:00	2019-12-21 06:00:04	0.23	42.88	29.62	0.91	0	0.01	295.6	3.97	-5.16	22.45	6.51049	322.426	16.2	20.3	2.3	14.6	37.8	364																180.096	441.84			4.6225	4.6225			17.7282	22.0383
2019-12-20_21:00:00	2019-12-21 07:00:04	0.26	45.99	32.68	1.04	0	0.01	296.09	0.94	-7.09	22.94	7.15204	352.448	20.6	21.1	2.5	19.4	36.7	414																145.926	183.874			3.3856	3.3856			21.6415	30.6478
2019-12-20_22:00:00	2019-12-21 08:00:04	0.27	49.47	34.56	1.12	0.01	0.02	296.45	1.56	-6.05	23.3	6.24789	345.541	21.3	23.1	2.5	27	35	363																175.828	175.828			0.04	3.2761			14.0467	21.4544
2019-12-20_23:00:00	2019-12-21 09:00:04	0.65	53.74	35.18	1.13	0.01	0.02	296.84	-1.21	-5.76	23.69	5.88572	11.8637	21.3	26.2	2.3	33.9	38.9	291																192.654	192.654			6.3001	28.09			12.8574	16.5626
2019-12-21_00:00:00	2019-12-21 10:00:04	1.43	60.18	36.01	1.1	0.01	0.03	296.74	-2.44	-5.46	23.59	5.9804	24.0793	23.8	26	2.6	55.6	57.5	270																149.084	149.084			5.8081	25			11.4271	19.9309
2019-12-21_01:00:00	2019-12-21 11:00:04	1.12	61.32	37.09	1.09	0.01	0.03	295.43	-5.47	-4.89	22.28	7.3371	48.2045	23	24.8	3.1	51.2	83.5	254																198.528	198.528			6.3504	6.3504			17.953	39.9563
2019-12-21_02:00:00	2019-12-21 12:00:04	1.65	65.65	37.31	1.01	0.01	0.03	294.6	-3.17	-5.39	21.45	6.25308	30.461	34.2	26.3	2.6	45.7	80.9	296																9.6721	21.8089			23.5225	23.5225			13.345	22.4399
2019-12-21_03:00:00	2019-12-21 13:00:04	2.43	70.1	37.58	1.01	0.01	0.03	295.3	-2.88	-4.77	22.15	5.57201	31.1226	42.8	27	2.6	43.7	70	348																27.2484	183.332			23.5225	23.5225			8.83285	16.4512
2019-12-21_04:00:00	2019-12-21 14:00:04	2.47	72.47	38.41	1.05	0.01	0.02	295.3	-2.84	-4.46	22.15	5.28746	32.4879	45.3	27.2	2.5	37.8	75.1	522																47.4721	284.597			25.5025	25.5025			7.76992	13.4796
2019-12-21_05:00:00	2019-12-21 15:00:04	2.71	74.32	38.17	1.04	0.01	0.02	295.55	-1.27	-3	22.4	3.25774	22.9447	44.1	27	1.7	65.3	98.2	592																35.1649	238.085			21.16	23.1361			2.42657	2.42657
2019-12-21_06:00:00	2019-12-21 16:00:04	8.5	103.81	43.76	1.31	0.01	0.02	299.26	0.15	-4.02	26.11	4.0228	357.863	53.6	27.2	4.3	173.2	141.2	583																96.8256	931.47			1.1881	76.0384			0.0768412	17.6971
2019-12-21_07:00:00	2019-12-21 17:00:04	9.65	117.76	51.46	1.69	0.01	0.02	299.17	-0.65	-2.21	26.02	2.30361	16.3896	80.2	24.4	6	182.5	185.9	613																825.988	4201.63			2.6244	33.9889			13.6633	17.536
2019-12-21_08:00:00	2019-12-21 18:00:04	7.24	107.9	49.16	1.54	0.01	0.02	296.15	-1.49	-3.32	23	3.63902	24.1704	70.6	22.6	4.5	183.9	23.8	735																459.674	2800.53			0.16	1.0201			0.741279	16.1847
2019-12-21_09:00:00	2019-12-21 19:00:04	6.25	100.36	45.58	1.36	0.01	0.03	297.46	-0.48	-0.79	24.31	0.924392	31.2828	55	21.2	3.6	181.6	58.3	879																88.7364	1138.39			9.6721	9.6721			7.15888	7.15888
2019-12-21_10:00:00	2019-12-21 20:00:04	4.07	89.32	43.3	1.19	0.01	0.02	294.8	1.42	7.16	21.65	7.29945	191.218	32.8	20.6	2.9	189	58.9	1722																110.25	110.25			1.1025	5.4756			19.3552	37.0084
2019-12-21_11:00:00	2019-12-21 21:00:04	8.89	179.56	101.51	4.25	0.01	0.01	295.25	-6.37	-1.14	22.1	6.47121	79.8537	18.6	20.1	2.9	182.2	59.2	1386																6874.07	6874.07			4	5.7121			12.7535	27.6172
2019-12-21_12:00:00	2019-12-21 22:00:04	10.32	146.88	62.02	1.82	0.01	0.01	295.12	-1.59	-2.16	21.97	2.68211	36.3573	18.9	19.7	2.1	191.3	47.5	1378																1859.33	1859.33			5.1529	8.5264			0.338849	0.443699
2019-12-21_13:00:00	2019-12-21 23:00:04	9.68	113.2	41.49	0.9	0	0.01	296.17	-0.95	-6.37	23.02	6.44045	8.48246	17.1	19.5	2.3	191.8	40.3	1592																594.872	594.872			12.3904	12.3904			17.1433	21.3855
2019-12-21_14:00:00	2019-12-22 00:00:04	8.43	98.45	37.12	0.79	0	0.01	297.43	1.24	-10.88	24.28	10.9504	353.498	17.4	19.5	2.3	188.4	42.1	1702																388.878	388.878			22.8484	22.8484			74.83	83.4379
2019-12-21_15:00:00	2019-12-22 01:00:04	8.67	128.51	60.83	2.06	0.01	0.01	296.25	3.55	3.4	23.1	4.91554	226.236	20.7	19.5	2.4	180.7	38.2	3892																1610.42	1610.42			12.96	12.96			6.32792	10.237
2019-12-21_16:00:00	2019-12-22 02:00:04	8.79	133.74	65.79	2.35	0.01	0.01	295.89	0.82	-3.46	22.74	3.55584	346.667	18.6	19.2	3	169.2	40.2	1985																2226.9	2226.9			12.5316	12.5316			0.308958	5.95282
2019-12-21_17:00:00	2019-12-22 03:00:04	8.15	141.08	74.38	2.82	0.01	0.02	296.45	5.15	-5.09	23.3	7.2409	314.664	15.4	18.8	3.2	167.6	41	268																3478.64	3478.64			20.25	20.25			16.3289	40.0043
2019-12-21_18:00:00	2019-12-22 04:00:04	8.05	154.57	86.91	3.51	0.01	0.02	295.66	3.04	-0.08	22.51	3.04105	271.507	17.4	18.4	3	168.4	41.4	264																4831.64	4831.64			16.8921	16.8921			0.0016853	3.70583
2019-12-21_19:00:00	2019-12-22 05:00:04	0	24.59	13.83	0.5	0	0	292.77	3.31	8.78	19.62	9.3832	200.656	16.6	18.3	2.4	177.4	47.8	213																7.6729	1325.69			1.7424	44.4889			48.7651	58.786
2019-12-21_20:00:00	2019-12-22 06:00:04	0	26.88	15.84	0.62	0	0	292.55	3.01	8.07	19.4	8.61307	200.455	20.4	18.1	1.9	189.2	45.1	239																20.7936	936.36			1.69	50.2681			45.0653	45.0653
2019-12-21_21:00:00	2019-12-22 07:00:04	0	27.86	17	0.69	0	0	292.62	2.38	8.01	19.47	8.35611	196.548	14.4	18.1	2	193.7	42.1	187																6.76	1255.99			1.8769	49.2804			40.4001	40.4001
2019-12-21_22:00:00	2019-12-22 08:00:04	0	26.19	15.89	0.64	0	0	292.88	1.41	7.87	19.73	7.99531	190.157	14.8	18.2	1.9	186.8	43.3	167																1.1881	1306.82			2.3409	44.3556			37.1528	37.1528
2019-12-21_23:00:00	2019-12-22 09:00:04	0	21.78	12.42	0.46	0	0	293.17	0.17	7.83	20.02	7.83185	181.244	13.2	18.4	2.4	178.2	36.4	171																0.6084	1699.09			2.6244	38.0689			29.5049	37.4036
2019-12-22_00:00:00	2019-12-22 10:00:04	0	16	6.66	0.11	0	0	293.2	-1.08	7.84	20.05	7.91404	172.156	13	19.1	3.3	171.4	36.9	225																40.1956	2225.95			0.9025	29.5936			21.2893	50.3821
2019-12-22_01:00:00	2019-12-22 11:00:04	0	15.38	5.4	0.01	0	0	293.02	-1.92	7.67	19.87	7.90666	165.946	18.8	19.8	3.5	166.3	33.4	260																179.56	1818.17			0.0049	24.2064			19.4187	53.1537
2019-12-22_02:00:00	2019-12-22 12:00:04	0	18.24	6.24	0	0	0	292.8	-2.66	7.18	19.65	7.65689	159.672	17.4	19.6	3.6	156.1	31.6	232																124.546	1866.24			0.0025	28.5156			16.4584	50.9923
2019-12-22_03:00:00	2019-12-22 13:00:04	0	18.93	6.58	0	0	0	292.8	-3.09	7.18	19.65	7.81668	156.715	15.3	19.6	3.5	163.3	31.8	236																76.0384	2021.4			0.0025	28.5156			18.6337	51.8498
2019-12-22_04:00:00	2019-12-22 14:00:04	0	17.54	6.23	0	0	0	292.82	-3.12	7	19.67	7.66384	155.977	19.4	18.7	3.2	167.8	33.9	223																173.449	1698.26			0.9409	38.6884			19.9258	45.5333
2019-12-22_05:00:00	2019-12-22 15:00:04	0	17.23	6.05	0	0	0	292.87	-3.1	6.95	19.72	7.61003	155.961	15.6	18.7	2.6	165.9	39.1	172																91.2025	2042.14			1.0404	38.0689			25.1004	37.1372
2019-12-22_06:00:00	2019-12-22 16:00:04	0	16.19	5.61	0	0	0	292.97	-3.02	7.11	19.82	7.7248	156.986	12.7	18.8	2.4	165.3	35.8	206																50.2681	2355.16			1.0404	35.6409			28.3535	36.1057
2019-12-22_07:00:00	2019-12-22 17:00:04	0	17.5	6.22	0	0	0	293.16	-2.71	6.1	20.01	6.67489	156.046	14.9	19.2	2.3	160.4	30.6	253																75.3424	2090.32			0.6561	28.9444			19.1396	23.6088
2019-12-22_08:00:00	2019-12-22 18:00:04	0	20.58	7.6	0	0	0	293.25	-1.71	5.75	20.1	5.99888	163.438	17.7	18.9	2.2	153.8	36.5	240																102.01	1725.57			1.44	31.2481			14.4315	16.6699
2019-12-22_09:00:00	2019-12-22 19:00:04	0	22.39	8.42	0	0	0	293.25	-1.29	6.1	20.1	6.23491	168.059	18.9	18.3	2.1	161.8	38	397																109.83	1561.83			3.24	38.3161			17.0975	17.7992
2019-12-22_10:00:00	2019-12-22 20:00:04	0	21.19	8.07	0	0	0	293.21	-1.02	6.44	20.06	6.52028	171	14.4	17.9	1.8	167.6	35	288																40.0689	1968.7			4.6656	43.9569			22.281	22.281
2019-12-22_11:00:00	2019-12-22 21:00:04	0	19.16	7.38	0	0	0	293.22	-1.18	6.1	20.07	6.21308	169.052	20.7	17.3	1.1	233.6	39	262																177.422	1502.34			7.6729	52.1284			26.1436	26.1436
2019-12-22_12:00:00	2019-12-22 22:00:04	0	20.32	7.73	0	0	0	293.19	-1.23	5.87	20.04	5.99748	168.165	18.3	16.5	1.4	240.9	31.4	374																111.725	1665.46			12.5316	64.8025			21.1368	21.1368
2019-12-22_13:00:00	2019-12-22 23:00:04	0	20.93	7.85	0	0	0	293.02	-1.4	5.5	19.87	5.67539	165.719	15.8	16.4	1.5	239.9	29.3	400																63.2025	1865.38			12.0409	69.2224			17.4338	17.4338
2019-12-22_14:00:00	2019-12-23 00:00:04	0	20.98	7.77	0	0	0	292.72	-1.2	4.56	19.57	4.71525	165.256	16.5	16.3	1.5	239.2	29.4	398																76.2129	1812.2			10.6929	76.0384			10.3378	10.3378
2019-12-22_15:00:00	2019-12-23 01:00:04	0	20.17	7.41	0	0	0	292.49	-0.83	4.25	19.34	4.33029	168.949	18.6	16.4	1.4	240.2	30.1	384																125.216	1667.09			8.6436	78.3225			8.58659	8.58659
2019-12-22_16:00:00	2019-12-23 02:00:04	0	18.8	6.91	0	0	0	292.39	-0.14	4.1	19.24	4.10239	178.044	16.2	16.7	1.1	230.2	30.7	395																86.3041	1912.31			6.4516	74.8225			9.01434	9.01434
2019-12-22_17:00:00	2019-12-23 03:00:04	0	18.47	6.64	0	0	0.01	292.12	0.94	4.21	18.97	4.31366	192.586	15.3	16.6	1.2	234.3	30.7	396																74.9956	2016.01			5.6169	81.3604			9.69491	9.69491
2019-12-22_18:00:00	2019-12-23 04:00:04	0	18.58	6.51	0	0	0.01	291.71	2.13	3.77	18.56	4.3301	209.466	20.4	16.9	0.5	241.2	31.9	424																192.932	1594.4			2.7556	83.3569			14.6697	14.6697
2019-12-22_19:00:00	2019-12-23 05:00:04	0	18.28	6.29	0	0	0.01	291.39	2.21	2.98	18.24	3.71005	216.561	23.7	17	0.6	227.5	36.6	507																303.108	1357.92			1.5376	87.4225			9.67244	9.67244
2019-12-22_20:00:00	2019-12-23 06:00:04	0	18.05	6.22	0	0	0.01	291.45	1.86	2.37	18.3	3.01272	218.125	21.4	17.5	0.6	244.3	35.1	513																230.432	1538.21			0.64	77.2641			5.82123	5.82123
2019-12-22_21:00:00	2019-12-23 07:00:04	0	18.52	6.51	0	0	0.01	291.82	0.64	1.62	18.67	1.74184	201.557	15.3	18	0.9	240.4	36.4	451																77.2641	2027.7			0.4489	62.7264			0.708691	2.17315
2019-12-22_22:00:00	2019-12-23 08:00:04	0	19.18	6.82	0	0	0.01	292.05	-0.39	0.9	18.9	0.980867	156.571	11	18.7	1	241.5	39.9	403																17.4724	2402.96			0.04	48.8601			0.000366073	4.55879
2019-12-22_23:00:00	2019-12-23 09:00:04	0	19.71	7.1	0	0	0.01	292.14	-1.24	0.31	18.99	1.27816	104.036	9.3	20	0.4	182.3		377																4.84	2544.19			1.0201	31.36			0.77117	5.94305
2019-12-23_00:00:00	2019-12-23 10:00:04	0	19.76	7.32	0	0	0.01	291.91	-2.55	-0.72	18.76	2.6497	74.233	7.1	20.6	1.6	102.4	39.2	418																0.0484	2747.86			3.3856	27.3529			1.10187	1.10187
2019-12-23_01:00:00	2019-12-23 11:00:04	0	20.89	7.91	0.01	0	0.01	291.82	-3.7	-1.07	18.67	3.85161	73.8708	9.6	21.1	1.7	85.3	37.5	358																2.8561	2433.45			5.9049	23.2324			4.62943	4.62943
2019-12-23_02:00:00	2019-12-23 12:00:04	0	22.72	8.8	0.01	0	0.01	292.42	-4.41	-1.89	19.27	4.79794	66.8015	10.6	21	1.9	81.1	36.2	463																3.24	2250.55			2.9929	18.6624			8.39804	8.39804
2019-12-23_03:00:00	2019-12-23 13:00:04	0	22.32	8.86	0.01	0	0	293.08	-5.14	-2.08	19.93	5.54491	67.9685	14.4	21	2.1	67.6	18.9	478																30.6916	1899.22			1.1449	13.3956			11.8674	12.4532
2019-12-23_04:00:00	2019-12-23 14:00:04	0	21.2	8.5	0.01	0	0	293.47	-5.63	-2.25	20.32	6.06295	68.2163	18.1	22.4	2.6	54.7	30.6	793																92.16	1619.26			4.3264	4.3264			11.992	20.6748
2019-12-23_05:00:00	2019-12-23 15:00:04	0	21.18	8.49	0.01	0	0	293.84	-6.05	-2.63	20.69	6.59692	66.505	19.4	23.1	2.9	53.9	32.7	1027																119.028	1517.1			5.8081	5.8081			13.6672	28.9543
2019-12-23_06:00:00	2019-12-23 16:00:04	0	25.09	9.67	0.01	0	0	294.07	-6.15	-2.84	20.92	6.77408	65.2132	13.2	22.8	3.3	47.8	32.6	633																12.4609	1933.36			3.5344	3.5344			12.0692	35.4987
2019-12-23_07:00:00	2019-12-23 17:00:04	0	28.58	10.92	0.02	0	0	294.23	-5.54	-2.97	21.08	6.2859	61.8043	12	22.2	3.2	48.2	37.6	505																1.1664	1928.97			1.2544	1.7161			9.52276	28.8358
2019-12-23_08:00:00	2019-12-23 18:00:04	0	25.97	10.34	0.02	0	0	294.36	-4.73	-2.46	21.21	5.33146	62.5219	12.7	21.7	2.7	41.4	40.8	1051																5.5696	1918.44			0.2401	2.8224			6.9246	15.3309
2019-12-23_09:00:00	2019-12-23 19:00:04	0	22.94	9.72	0.04	0	0	294.49	-3.77	-1.69	21.34	4.13146	65.8546	11.7	21.3	2.8	33.6	39.7	897																3.9204	2062.98			0.0016	3.8025			1.7728	7.92684
2019-12-23_10:00:00	2019-12-23 20:00:04	0	22.3	10.17	0.07	0	0	294.58	-3.79	-0.95	21.43	3.90725	75.9283	14.2	21	2.1	29.9	34	785																16.2409	1803.7			0.1849	4.6656			3.26615	3.57683
2019-12-23_11:00:00	2019-12-23 21:00:04	0	22.41	10.88	0.11	0	0.01	294.45	-3.92	-1.22	21.3	4.10546	72.7127	12.8	20.5	1.5	10.8	32.3	754																3.6864	1862.79			0.64	7.7841			6.78842	6.78842
2019-12-23_12:00:00	2019-12-23 22:00:04	0	24.88	11.72	0.12	0	0.01	294.39	-3.48	-1.94	21.24	3.98422	60.8617	6.6	20.1	0.7	1.2	21.2																	26.2144	2354.19			1.2996	10.5625			10.7861	10.7861
2019-12-23_13:00:00	2019-12-23 23:00:04	0	26.44	11.86	0.11	0	0.01	294.41	-3.15	-2.77	21.26	4.19469	48.6728	4.3	20.1	0.2	267.7	17.6	843																57.1536	2568.46			1.3456	10.4329			15.9575	15.9575
2019-12-23_14:00:00	2019-12-24 00:00:04	0	28.34	11.99	0.1	0	0.01	294.48	-0.11	1.54	21.33	1.54392	175.914	6.5	20.5	0.2	14.2	15.2	566																30.1401	2337.72			0.6889	7.6176			1.80613	5.62675
2019-12-23_15:00:00	2019-12-24 01:00:04	0	28.73	12.15	0.08	0	0.01	294.28	-3.8	1.03	21.13	3.93712	105.166	4.8	20.8	0.2	57.4	13.5	513																54.0225	2489.01			0.1089	7.0756			13.9661	13.9661
2019-12-23_16:00:00	2019-12-24 02:00:04	0	29.22	11.64	0.05	0	0	294.52	-4.14	-2.48	21.37	4.82597	59.0771	2.7	21	0.8	344.3	13.8	542																79.9236	2756.25			0.1369	4.9284			16.2084	16.2084
2019-12-23_17:00:00	2019-12-24 03:00:04	0	30.34	11.7	0.04	0	0	294.62	-3.9	-2.38	21.47	4.56885	58.6062	3.1	20.8	1	352.4	12.1	483																73.96	2708.16			0.4489	5.3824			12.7367	12.7367
2019-12-23_18:00:00	2019-12-24 04:00:04	0	30.76	12	0.04	0	0	294.71	-3.86	-2.82	21.56	4.78038	53.8494	6.7	20.5	0.6	340.3	14.5	348																28.09	2317.46			1.1236	6.4009			17.4755	17.4755
2019-12-23_19:00:00	2019-12-24 05:00:04	0	16.65	5.43	0	0	0	294.12	-5.83	-3.6	20.97	6.85193	58.305	11.6	19.3	0.4	250.9	16.4	402																38.0689	2481.04			2.7889	18.6624			41.6274	41.6274
2019-12-23_20:00:00	2019-12-24 06:00:04	0	19.31	6.25	0	0	0	293.98	-6.42	-3.15	20.83	7.15115	63.8651	14.7	19.4	0.7	243	20.1	499																71.4025	2105.89			2.0449	19.0096			41.6173	41.6173
2019-12-23_21:00:00	2019-12-24 07:00:04	0	21.99	7.09	0	0	0	294.04	-6.28	-2.93	20.89	6.92988	64.9882	9.8	21	0.1	54.2	33.5	506																7.3441	2495			0.0121	7.29			46.6473	46.6473
2019-12-23_22:00:00	2019-12-24 08:00:04	0	20.03	6.61	0	0	0	294.05	-6.68	-3.62	20.9	7.59782	61.5461	11.4	21.9	1.4	128.9	48.4	675																22.9441	2384.37			1	3.2041			38.4129	38.4129
2019-12-23_23:00:00	2019-12-24 09:00:04	0	21	6.99	0	0	0	294.08	-6.46	-2.72	20.93	7.00928	67.1665	47.9	21	2	142.6	152.1	561																1673.63	1673.63			0.0049	7.0756			25.0929	25.0929
2019-12-24_00:00:00	2019-12-24 10:00:04	0	19.73	6.85	0.02	0	0	294.1	-6.68	-0.68	20.95	6.71452	84.1877	96.5	21.4	2	145.5	125.9	438																8037.12	8037.12			0.2025	5.0176			22.2267	22.2267
2019-12-24_01:00:00	2019-12-24 11:00:04	0	22.56	7.61	0.01	0	0	294.17	-6.07	0.26	21.02	6.07557	92.4525	99.1	21.6	2.1	156.4	115.6	287																8370.42	8370.42			0.3364	3.8809			15.8051	16.4801
2019-12-24_02:00:00	2019-12-24 12:00:04	0	27	8.51	0	0	0	294.14	-6.3	0.67	20.99	6.33553	96.0704	88.3	21.5	2.8	166	97.9	346																6366.44	6366.44			0.2601	4.41			12.4999	25.1956
2019-12-24_03:00:00	2019-12-24 13:00:04	0	26.73	8.28	0	0	0	294.14	-6.65	1.64	20.99	6.84924	103.854	77.7	21.7	2.3	163.6	81.2	376																4819.14	4819.14			0.5041	3.61			20.6956	25.3335
2019-12-24_04:00:00	2019-12-24 14:00:04	0	26.25	8.13	0	0	0	294.12	-6.58	1.92	20.97	6.8544	106.267	62.5	21.6	2.5	164.1	78.1	773																2956.1	2956.1			0.3969	4.0804			18.9608	27.4408
2019-12-24_05:00:00	2019-12-24 15:00:04	0	29.8	9.34	0	0	0	294.13	-6.19	1.6	20.98	6.39344	104.493	49.6	21.6	2.7	171.9	67.3	1484																1620.87	1620.87			0.3844	4.0401			13.6415	24.7749
2019-12-24_06:00:00	2019-12-24 16:00:04	0	35.5	11.16	0	0	0	294.17	-6	0.86	21.02	6.06132	98.1567	33	21.4	2.4	177.3	51.2	1406																476.986	514.382			0.1444	4.7089			13.4053	18.8818
2019-12-24_07:00:00	2019-12-24 17:00:04	0	39.56	12.35	0	0	0	294.23	-6.29	0.36	21.08	6.30029	93.2755	25.1	21.5	2.5	179.6	38.9	1389																162.563	863.772			0.1764	4.0401			14.4422	21.9426
2019-12-24_08:00:00	2019-12-24 18:00:04	0	40.13	12.57	0	0	0	294.32	-6.2	-0.06	21.17	6.20029	89.4457	21.1	21.5	1.7	189.2	39.3	7559																72.7609	1100.25			0.1089	3.6864			20.2526	20.2526
2019-12-24_09:00:00	2019-12-24 19:00:04	0	41.04	12.84	0	0	0	294.24	-6.21	-0.05	21.09	6.2102	89.5388	15.6	21.3	1.3	226.9	34.8	4777																7.6176	1474.56			0.0441	4.84			24.1101	24.1101
2019-12-24_10:00:00	2019-12-24 20:00:04	0	39.76	12.46	0	0	0	294.16	-6.47	0.06	21.01	6.47028	90.5312	26	20.8	1.1	238.3	70.5	4112																183.332	805.424			0.0441	7.7284			28.8399	28.8399
2019-12-24_11:00:00	2019-12-24 21:00:04	0	36.21	11.39	0	0	0	294.01	-6.44	0.18	20.86	6.44252	91.6009	43.7	20.3	0.9	239	62.4	3962																1043.94	1043.94			0.3136	11.7649			30.7195	30.7195
2019-12-24_12:00:00	2019-12-24 22:00:04	0	35.69	11.17	0	0	0	293.99	-6.19	-0.07	20.84	6.1904	89.3522	52.6	19.9	0.9	223.2	63.4	3149																1716.44	1716.44			0.8836	14.8225			27.9883	27.9883
2019-12-24_13:00:00	2019-12-24 23:00:04	0	35.59	11.15	0	0	0	293.91	-6.2	-0.18	20.76	6.20261	88.3372	56.2	19.8	1.1	236.1	51.7	2774																2029.5	2029.5			0.9216	16.2409			26.0367	26.0367
2019-12-24_14:00:00	2019-12-25 00:00:04	0	34.91	10.94	0	0	0	293.88	-5.91	0.26	20.73	5.91572	92.5189	44.8	19.8	0.9	220.8	34.8	1790																1146.5	1146.5			0.8649	16.4836			25.1574	25.1574
2019-12-24_15:00:00	2019-12-25 01:00:04	0	34.06	10.68	0	0	0	293.8	-5.57	0.37	20.65	5.58228	93.8003	31.5	19.7	1.1	224.7	26.3	987																433.472	608.116			0.9025	17.9776			20.0908	20.0908
2019-12-24_16:00:00	2019-12-25 02:00:04	0	32.98	10.36	0	0	0	293.83	-5.29	0.66	20.68	5.33101	97.1115	26.3	19.5	1.2	240.1	19.7	690																254.084	910.832			1.3924	19.4481			17.0653	17.0653
2019-12-24_17:00:00	2019-12-25 03:00:04	0	31.17	9.83	0	0	0	293.83	-5.27	0.58	20.68	5.30182	96.2804	17.4	19.3	0.8	225.4	12.5	670																57.3049	1568.95			1.9044	21.2521			20.2664	20.2664
2019-12-24_18:00:00	2019-12-25 04:00:04	0	30.03	9.51	0	0	0	293.88	-4.98	0.6	20.73	5.01601	96.8698	12.5	19.4	0.4	231.4	14.6	632																8.9401	2009.73			1.7689	19.8916			21.3076	21.3076
2019-12-24_19:00:00	2019-12-25 05:00:04	0	30.54	9.64	0	0	0	293.83	-4.82	0.4	20.68	4.83657	94.7438	14.5	19.2	0.3	289	15.1	1910																23.6196	1823.29			2.1904	22.1841			20.5805	20.5805
2019-12-24_20:00:00	2019-12-25 06:00:04	0	30.31	9.55	0	0	0	293.93	-5.11	-0.06	20.78	5.11035	89.3274	16.8	19.1	0.5	250.4	21.6	2274																52.5625	1639.44			2.8224	22.1841			21.2553	21.2553
2019-12-24_21:00:00	2019-12-25 07:00:04	0	28.04	8.88	0	0	0	294.01	-4.75	-0.03	20.86	4.75009	89.6383	19.3	19.5	0.5	298.6	27.6	2707																108.576	1494.6			1.8496	17.8929			18.0633	18.0633
2019-12-24_22:00:00	2019-12-25 08:00:04	0	26.68	8.48	0	0	0	294.03	-5.24	-0.21	20.88	5.24421	87.7052	17.9	20.8	0.6	183.1	34.8	2222																88.7364	1637.01			0.0064	8.4681			21.5687	21.5687
2019-12-24_23:00:00	2019-12-25 09:00:04	0	25.91	8.28	0	0	0	294.06	-5.55	-1.13	20.91	5.66387	78.4918	22.6	22.1	1.3	98.9	47.7	1480																205.062	1293.12			1.4161	2.4964			19.0433	19.0433
2019-12-25_00:00:00	2019-12-25 10:00:04	0	24.29	7.79	0	0	0	293.89	-5.67	-1.18	20.74	5.79149	78.244	21.7	22.7	2.2	111.3	38.3	1289																193.488	1395.02			3.8416	3.8416			12.8988	15.0194
2019-12-25_01:00:00	2019-12-25 11:00:04	0	22.79	7.34	0	0	0	293.64	-5.48	-1.5	20.49	5.68158	74.692	22.4	23	2.6	106.9	37.8	1140																226.804	1376.41			6.3001	6.3001			9.49616	17.3521
2019-12-25_02:00:00	2019-12-25 12:00:04	0	22.53	7.24	0	0	0	293.61	-5.78	-2	20.46	6.11624	70.9135	20.1	23.1	2.2	92.5	38.2	665																165.38	1560.25			6.9696	6.9696			15.3369	17.642
2019-12-25_03:00:00	2019-12-25 13:00:04	0	22.38	7.19	0	0	0	293.68	-5.88	-2.5	20.53	6.3894	66.9664	20.4	23.3	2.2	98.4	40.3	681																174.504	1540.56			7.6729	7.6729			17.5511	20.0113
2019-12-25_04:00:00	2019-12-25 14:00:04	0	21.12	6.85	0	0	0	293.79	-6.16	-2.9	20.64	6.80849	64.79	27.6	23.6	2.4	78.5	37.9	769																430.562	1049.11			8.7616	8.7616			19.4348	25.9335
2019-12-25_05:00:00	2019-12-25 15:00:04	0	20.07	6.58	0	0	0	293.91	-6.35	-3.17	20.76	7.09728	63.4712	20.8	24.3	2.7	58.3	32.8	823																202.208	1557.09			12.5316	12.5316			19.3361	32.277
2019-12-25_06:00:00	2019-12-25 16:00:04	0	18.82	6.25	0	0	0	294.08	-6.46	-3.85	20.93	7.52025	59.2062	16.1	24.5	2.8	47.5	25.8	881																97.0225	1979.36			12.7449	12.7449			22.2807	38.4927
2019-12-25_07:00:00	2019-12-25 17:00:04	0	17.44	5.87	0	0	0	294.24	-6.21	-4.52	21.09	7.68079	53.9508	14.7	24	2.5	47.2	27.4	980																77.9689	2140.91			8.4681	8.4681			26.8406	36.7817
2019-12-25_08:00:00	2019-12-25 18:00:04	0	17.56	5.95	0	0	0	294.3	-5.89	-5.18	21.15	7.84376	48.6699	11.8	23.4	2.6	41.5	28.7	1026																34.2225	2409.83			5.0625	5.0625			27.497	40.0405
2019-12-25_09:00:00	2019-12-25 19:00:04	0	16.97	5.82	0	0	0	294.41	-5.63	-5.4	21.26	7.80108	46.1947	15.3	22.7	2.7	39.2	33.5	657																89.8704	2090.32			2.0736	2.0736			26.0211	40.7693
2019-12-25_10:00:00	2019-12-25 20:00:04	0	16.39	5.67	0	0	0	294.44	-5.34	-5.56	21.29	7.70903	43.8438	13.5	22.4	2.3	37.2	32.4	629																61.3089	2272.43			1.2321	1.2321			29.2576	34.7278
2019-12-25_11:00:00	2019-12-25 21:00:04	0	17.02	5.88	0	0	0	294.43	-4.72	-5.73	21.28	7.4237	39.4796	15.7	22.1	1.5	30.4	27.5	645																96.4324	2048.47			0.6724	1.4641			35.0902	35.0902
2019-12-25_12:00:00	2019-12-25 22:00:04	0	17.36	6	0	0	0	294.41	-4.08	-5.64	21.26	6.96103	35.8822	13.3	21.5	0.9	2.7	22.5	652																53.29	2260.05			0.0576	3.3489			36.7361	36.7361
2019-12-25_13:00:00	2019-12-25 23:00:04	0	17.27	6.02	0	0	0.01	294.37	-3.34	-5.57	21.22	6.49465	30.9487	13.2	20.9	0.7	344.6	17.6	711																51.5524	2267.66			0.1024	6.1009			33.578	33.578
2019-12-25_14:00:00	2019-12-26 00:00:04	0	16.87	5.96	0	0	0.01	294.34	-2.68	-5.31	21.19	5.94798	26.7805	9.2	20.3	0.7	354.5	15.9	652																10.4976	2670.82			0.7921	9.61			27.5413	27.5413
2019-12-25_15:00:00	2019-12-26 01:00:04	0	16.87	5.96	0	0	0.01	294.21	-2.17	-5.12	21.06	5.56087	22.9687	9.8	20.3	0.6	353.5	15.4	516																14.7456	2609.17			0.5776	10.4329			24.6103	24.6103
2019-12-25_16:00:00	2019-12-26 02:00:04	0	17.1	6.02	0	0	0.01	294.08	-1.78	-4.8	20.93	5.11941	20.3466	7.8	20	0.7	348.7	16.1	565																3.1684	2811.12			0.8649	13.3956			19.5312	19.5312
2019-12-25_17:00:00	2019-12-26 03:00:04	0	17.27	6.07	0	0	0.02	293.97	-1.48	-4.68	20.82	4.90844	17.5491	7	19.6	0.2	4.6	17.6	703																0.8649	2891.21			1.4884	17.3889			22.1694	22.1694
2019-12-25_18:00:00	2019-12-26 04:00:04	0	17.33	6.1	0	0	0.02	293.88	-1.03	-4.56	20.73	4.67488	12.7283	9.5	19	0.2	272	17.2	521																11.56	2625.54			2.9929	23.6196			20.0245	20.0245
2019-12-25_19:00:00	2019-12-26 05:00:04	0	17.24	6.1	0	0.01	0.02	293.78	-0.43	-4.24	20.63	4.26175	5.79094	7.8	18.4	0.2	284.5	15.8	446																2.89	2802.64			4.9729	30.9136			16.4978	16.4978
2019-12-25_20:00:00	2019-12-26 06:00:04	0	16.9	6.07	0	0.01	0.03	293.65	-0.11	-4.13	20.5	4.13146	1.52575	6.7	19.4	0.4	342.6	19.6	449																0.3969	2923.56			1.21	21.9961			13.9238	13.9238
2019-12-25_21:00:00	2019-12-26 07:00:04	0	16.57	6.12	0.01	0.01	0.03	293.78	-0.02	-3.77	20.63	3.77005	0.30403	3.3	22.1	1.2	18.1	19.5	582																7.9524	3297.06			2.1609	3.4596			6.60517	6.60517
2019-12-25_22:00:00	2019-12-26 08:00:04	0	16.26	6.19	0.02	0.01	0.03	294.15	-0.92	-3.53	21	3.64792	14.6077	6.7	23.7	2	55.1	24	650																0.2601	2910.6			7.29	7.29			2.71563	2.71563
2019-12-25_23:00:00	2019-12-26 09:00:04	0	16.11	6.09	0.02	0.01	0.03	294.18	-3.11	-3.57	21.03	4.73466	41.0608	6.3	24.1	2.7	58.8	23.4	518																0.0441	2964.8			9.4249	9.4249			4.13984	11.0135
2019-12-26_00:00:00	2019-12-26 10:00:04	0	15.68	5.68	0	0.01	0.02	293.92	-5.34	-4.67	20.77	7.09398	48.8294	7.9	24.2	3	63.3	24.9	441																4.9284	2836.63			11.7649	11.7649			16.7606	35.7362
2019-12-26_01:00:00	2019-12-26 11:00:04	0	15.02	5.44	0	0	0.01	293.79	-6.89	-6.23	20.64	9.28897	47.8799	11.8	24.6	3.2	50.4	24.9	406																40.4496	2460.16			15.6816	15.6816			37.0756	70.1067
2019-12-26_02:00:00	2019-12-26 12:00:04	0	15.03	5.44	0	0	0	293.75	-7.69	-6.94	20.6	10.3586	47.9348	10.1	24.8	3.4	40.3	23.3	493																21.7156	2631.69			17.64	17.64			48.4215	92.9789
2019-12-26_03:00:00	2019-12-26 13:00:04	0	15.05	5.51	0	0	0	293.82	-7.75	-6.88	20.67	10.3632	48.4033	15.5	25.1	3.3	43	23.3	547																99.8001	2100.39			19.6249	19.6249			49.8895	91.1499
2019-12-26_04:00:00	2019-12-26 14:00:04	0	15.7	5.71	0	0	0	293.93	-7.69	-7.63	20.78	10.833	45.2245	19.2	25.2	3.5	46.9	21.6	574																181.98	1758.12			19.5364	19.5364			53.7723	104.386
2019-12-26_05:00:00	2019-12-26 15:00:04	0	16.15	5.86	0	0	0	294.12	-7.61	-8.19	20.97	11.1798	42.8978	12.7	24.8	4.1	47.1	21.7	703																46.7856	2330.96			14.6689	14.6689			50.1237	124.631
2019-12-26_06:00:00	2019-12-26 16:00:04	0	16.67	6	0	0	0	294.3	-7.37	-8.65	21.15	11.364	40.4319	6.7	24.5	4.2	47	22.6	500																0.49	2931.14			11.2225	11.2225			51.3222	131.056
2019-12-26_07:00:00	2019-12-26 17:00:04	0	16.81	6.02	0	0	0	294.59	-6.51	-8.8	21.44	10.9462	36.4931	6.5	24.1	3.6	43.4	23	495																0.2304	2950.66			7.0756	7.0756			53.9672	108.79
2019-12-26_08:00:00	2019-12-26 18:00:04	0	16.08	5.8	0	0	0	294.89	-5.65	-8.82	21.74	10.4745	32.6433	9.7	23.5	3.9	44.3	23.8	506																15.21	2635.8			3.0976	3.0976			43.2239	105.237
2019-12-26_09:00:00	2019-12-26 19:00:04	0	16.25	5.86	0	0	0.01	295.06	-4.78	-8.61	21.91	9.84787	29.0378	9.4	23.1	3.1	45.7	34.8	559																12.5316	2660.5			1.4161	1.4161			45.5337	78.0019
2019-12-26_10:00:00	2019-12-26 20:00:04	0	15.55	5.66	0	0	0.01	295.01	-3.79	-8.44	21.86	9.2519	24.1827	12.3	22.7	1.4	35.2	39.1	403																44.0896	2389.25			0.7056	0.7056			61.6524	61.6524
2019-12-26_11:00:00	2019-12-26 21:00:04	0	14.72	5.43	0	0	0.01	294.84	-2.54	-7.84	21.69	8.24119	17.9514	9.7	21.9	0.9	51.6	48.3	376																18.2329	2673.92			0.0441	1			53.8931	53.8931
2019-12-26_12:00:00	2019-12-26 22:00:04	0	14.72	5.45	0	0	0.01	294.64	-1.67	-7.41	21.49	7.59585	12.7007	6.4	21.2	0.3	19.5	27.5	362																0.9025	3023.9			0.0841	3.61			53.2295	53.2295
2019-12-26_13:00:00	2019-12-26 23:00:04	0	14.37	5.36	0	0	0.01	294.43	-1.06	-7.01	21.28	7.08969	8.59878	10.2	20.2	0.3	261.1	18.4	304																23.4256	2629.64			1.1664	9.6721			46.0999	46.0999
2019-12-26_14:00:00	2019-12-27 00:00:04	0	12.58	4.84	0	0	0.02	294.21	-0.46	-6.78	21.06	6.79559	3.88146	8.6	19.4	0.3	243.8	14.4	282																14.1376	2851.56			2.7556	17.0569			42.1926	42.1926
2019-12-26_15:00:00	2019-12-27 01:00:04	0	9.95	4.04	0	0	0.02	293.83	-0.07	-7.22	20.68	7.22034	0.555558	7.5	18.8	0.2	243.8	9.8	289																11.9716	3058.09			3.5344	26.1121			49.2852	49.2852
2019-12-26_16:00:00	2019-12-27 02:00:04	0	8.63	3.64	0	0.01	0.02	293.47	0.4	-7.51	20.32	7.52064	356.951	5.3	18.5	0.4	250	12.5	322																2.7556	3352.41			3.3124	33.2929			50.7036	50.7036
2019-12-26_17:00:00	2019-12-27 03:00:04	0	8.39	3.6	0.01	0.01	0.02	293.13	0.84	-7.65	19.98	7.69598	353.734	2.4	18.1	0.4	265.3	9.6	219																1.44	3701.51			3.5344	42.3801			53.2313	53.2313
2019-12-26_18:00:00	2019-12-27 04:00:04	0	8.57	3.71	0.01	0.01	0.02	292.89	1.18	-7.74	19.74	7.82943	351.332	6.8	17.7	0.3	266.3	8.5	154																9.5481	3173.07			4.1616	51.1225			56.6923	56.6923
2019-12-26_19:00:00	2019-12-27 05:00:04	0	8.72	3.83	0.01	0.01	0.02	292.73	1.39	-8.08	19.58	8.19869	350.239		17.4	0.3	260.6	9	482																14.6689	3970.26			4.7524	57.9121			62.3893	62.3893
2019-12-26_20:00:00	2019-12-27 06:00:04	0	8.91	3.96	0.02	0.01	0.02	292.75	1.36	-7.96	19.6	8.07535	350.304		18	0.1	227.4	14.5	725																15.6816	3953.89			2.56	48.8601			63.6061	63.6061
2019-12-26_21:00:00	2019-12-27 07:00:04	0	8.69	3.95	0.02	0.01	0.02	293.36	1.06	-7.48	20.21	7.55473	351.934		21.6	1.1	357.9	10.4	620																15.6025	3955.15			1.9321	7.7284			41.6636	41.6636
2019-12-26_22:00:00	2019-12-27 08:00:04	0	8.07	3.74	0.02	0	0.02	294.37	0.18	-7.1	21.22	7.10228	358.548	-1.4	23.1	1.6	72.9	24.9	868																26.4196	4160.25			3.5344	3.5344			30.2751	30.2751
2019-12-26_23:00:00	2019-12-27 09:00:04	0	7.38	3.42	0.02	0	0.02	295.25	-1.38	-6.35	22.1	6.49822	12.2611	-0.3	23.8	2.5	63	14.7	1185																13.8384	4060.24			2.89	2.89			15.9858	23.8361
2019-12-27_00:00:00	2019-12-27 10:00:04	0	7.75	3.38	0.01	0	0.02	295.48	-3.98	-5.43	22.33	6.73241	36.2402	6	24.6	2.6	61	17	795																6.8644	3301.65			5.1529	5.4756			17.0768	27.2109
2019-12-27_01:00:00	2019-12-27 11:00:04	0	11.68	4.53	0	0	0.01	294.69	-6.62	-6.14	21.54	9.02906	47.1544	4.8	24.7	3.1	52.3	18.5	782																0.0729	3307.4			9.9856	9.9856			35.1538	64.2092
2019-12-27_02:00:00	2019-12-27 12:00:04	0	14.77	5.48	0	0	0.01	294.45	-7.65	-7.43	21.3	10.6643	45.8359	10.8	24.7	3.5	42.2	15.9	864																28.3024	2556.31			11.56	11.56			51.3273	100.968
2019-12-27_03:00:00	2019-12-27 13:00:04	0	16.01	5.82	0	0	0	294.35	-8.2	-8.02	21.2	11.47	45.6359	8.3	24.9	3.4	44.3	18.2	655																6.1504	2779.4			13.69	13.69			65.1245	115.648
2019-12-27_04:00:00	2019-12-27 14:00:04	0	17.35	6.16	0	0	0	294.37	-8.2	-8.11	21.22	11.5331	45.3163	5.5	25	3.4	45.6	16.9	869																0.4356	3044.83			14.2884	14.2884			66.1471	117.009
2019-12-27_05:00:00	2019-12-27 15:00:04	0	18.68	6.53	0	0	0	294.58	-8.12	-8.64	21.43	11.8568	43.223	3.5	25	3	43.6	14.8	1373																9.1809	3227.38			12.7449	12.7449			78.4431	115.365
2019-12-27_06:00:00	2019-12-27 16:00:04	0	20.14	7	0	0	0	294.84	-7.4	-8.8	21.69	11.4978	40.0609	3.3	24.5	3.9	42.2	13.6	484																13.69	3196.77			7.8961	7.8961			57.727	127.28
2019-12-27_07:00:00	2019-12-27 17:00:04	0	20.48	7.05	0	0	0	295.07	-6.72	-8.69	21.92	10.9852	37.715	3	24.1	4.6	42.9	17.3	399																16.4025	3225.1			4.7524	4.7524			40.7707	131.542
2019-12-27_08:00:00	2019-12-27 18:00:04	0	19.88	6.82	0	0	0.01	295.18	-6.25	-8.83	22.03	10.8181	35.2915	3.1	23.7	3.9	41.6	19.8	309																13.8384	3239.89			2.7889	2.7889			47.8602	112.405
2019-12-27_09:00:00	2019-12-27 19:00:04	0	19.83	6.89	0	0	0.01	295.31	-5.07	-9.05	22.16	10.3734	29.2586	4.5	22.9	3	36.9	26.6	475																5.7121	3074.7			0.5476	0.5476			54.367	85.6994
2019-12-27_10:00:00	2019-12-27 20:00:04	0	21.43	7.6	0.01	0	0.01	295.21	-3.63	-9.15	22.06	9.84375	21.6394	7.1	22.6	2.3	34.6	19.9	333																0.25	2718.58			0.2916	0.2916			56.9082	64.4448
2019-12-27_11:00:00	2019-12-27 21:00:04	0	22.97	8.31	0.01	0	0.01	295.05	-2.36	-8.95	21.9	9.25592	14.772	7.6	22.4	1.5	29.4	18	193																0.5041	2593.86			0.25	0.25			60.1543	60.1543
2019-12-27_12:00:00	2019-12-27 22:00:04	0	24.6	9.2	0.04	0	0.01	294.87	-1.35	-8.68	21.72	8.78436	8.84047	6.1	21.8	0.7	10.1	17.1	196																9.61	2656.37			0.0064	1.1449			65.3568	65.3568
2019-12-27_13:00:00	2019-12-27 23:00:04	0	24.31	10.26	0.14	0	0.01	294.7	-0.23	-8.67	21.55	8.67305	1.51968	5.7	21.1	0.9	1.3	10.1	242																20.7936	2588.77			0.2025	3.7636			60.4203	60.4203
2019-12-27_14:00:00	2019-12-28 00:00:04	0	21.15	9.86	0.18	0	0.02	294.45	0.25	-8.94	21.3	8.94349	358.398	4.6	20.8	0.7	1.2	11.4	180																27.6676	2743.66			0.25	6.2001			67.9552	67.9552
2019-12-27_15:00:00	2019-12-28 01:00:04	0	18.64	8.8	0.15	0.01	0.02	294.11	0.12	-9.37	20.96	9.37077	359.266	5.6	20	0.2	304.6	12.2	172																10.24	2749.95			0.9216	13.1769			84.103	84.103
2019-12-27_16:00:00	2019-12-28 02:00:04	0	16.87	8.03	0.13	0.01	0.02	293.84	0.15	-9.11	20.69	9.11123	359.057	6.9	19.2	0.2	26.3	13	292																1.2769	2694.65			2.2201	22.09			79.4101	79.4101
2019-12-27_17:00:00	2019-12-28 03:00:04	0	15.94	7.84	0.14	0.01	0.02	293.67	0.29	-8.41	20.52	8.415	358.025	5.7	18.7	0.2	20.8	13.5	194																4.5796	2840.89			3.3124	28.8369			67.4862	67.4862
2019-12-27_18:00:00	2019-12-28 04:00:04	0	15.5	7.99	0.16	0.01	0.03	293.52	0.17	-7.79	20.37	7.79185	358.75	10.1	18.9	0.9	3.4	16.2	143																4.4521	2376.56			2.1609	28.3024			47.4977	47.4977
2019-12-27_19:00:00	2019-12-28 05:00:04	0	14.93	8.01	0.17	0.01	0.03	293.47	0.14	-8	20.32	8.00122	358.998	12.3	18.7	0.8	28.4	17.8	190																18.4041	2165.04			2.6244	31.0249			51.8576	51.8576
2019-12-27_20:00:00	2019-12-28 06:00:04	0	14.64	8.23	0.19	0.01	0.03	293.49	0.63	-7.28	20.34	7.30721	355.054	8.1	19.8	1.1	19.3	19.7	218																0.0169	2551.26			0.2916	19.8025			38.5294	38.5294
2019-12-27_21:00:00	2019-12-28 07:00:04	0	14.9	8.95	0.24	0.01	0.03	294.32	0.36	-6.08	21.17	6.09065	356.612	7.3	21.2	2.3	13.3	20.4	317																2.7225	2559.35			0.0009	4.9284			14.369	18.2726
2019-12-27_22:00:00	2019-12-28 08:00:04	0	14.91	9.21	0.26	0.01	0.03	295.13	-1.71	-5.34	21.98	5.60711	17.7564	8.8	22.6	1.9	49	27.7	313																0.1681	2384.37			0.3844	0.3844			13.7427	13.7427
2019-12-27_23:00:00	2019-12-28 09:00:04	0	14.88	9.17	0.26	0.01	0.03	295.08	-3.75	-5.4	21.93	6.57438	34.7779	3.1	23.3	2.1	56.3	23.7	313																36.8449	2977.88			1.8769	1.8769			20.0201	20.7788
2019-12-28_00:00:00	2019-12-28 10:00:04	0	16.3	9.79	0.27	0.01	0.02	294.81	-5.11	-5.93	21.66	7.82796	40.7522	5.1	23.9	2.6	47.2	24.9	467																21.9961	2698.8			5.0176	5.0176			27.3316	39.8409
2019-12-28_01:00:00	2019-12-28 11:00:04	0	19.57	12.42	0.39	0.01	0.02	294.78	-5.86	-6.58	21.63	8.81113	41.6877	14.1	24.3	3.4	30.1	29.6	458																2.8224	1625.7			7.1289	7.1289			29.2803	65.5311
2019-12-28_02:00:00	2019-12-28 12:00:04	0	24.06	16.21	0.55	0.01	0.02	295.47	-6.03	-7.09	22.32	9.30747	40.3811	20.6	24.5	3.3	34.5	31.2	492																19.2721	901.801			4.7524	4.9729			36.0897	72.1051
2019-12-28_03:00:00	2019-12-28 13:00:04	0	33.46	22.29	0.78	0.01	0.02	296.14	-6.21	-7.23	22.99	9.53084	40.6601	11.8	25	3.2	26.1	25.3	573																110.04	1072.56			4.0401	11.56			40.0796	74.2155
2019-12-28_04:00:00	2019-12-28 14:00:04	0	33.81	20.8	0.66	0.01	0.02	296.56	-6.03	-7.1	23.41	9.31509	40.3412	12.5	25.5	3.7	28.4	28	650																68.89	1124.93			4.3681	18.6624			31.5292	79.1938
2019-12-28_05:00:00	2019-12-28 15:00:04	0	32.29	17.67	0.46	0	0.01	296.76	-5.86	-7.81	23.61	9.764	36.8817	10.6	25.5	3.6	30.5	31	633																49.9849	1487.64			3.5721	20.4304			37.9949	85.5255
2019-12-28_06:00:00	2019-12-28 16:00:04	0	30.18	14.81	0.29	0	0.01	296.96	-5.44	-8.12	23.81	9.77384	33.8202	11.8	25.1	3.3	30.3	35.4	552																9.0601	1618.45			1.6641	18.6624			41.9106	80.2429
2019-12-28_07:00:00	2019-12-28 17:00:04	0	29.8	13.74	0.22	0	0.01	296.97	-3.72	-6.68	23.82	7.64597	29.1129	9.8	25	2.6	32.3	39.6	519																15.5236	1874.89			1.3924	17.8929			25.4618	37.5765
2019-12-28_08:00:00	2019-12-28 18:00:04	0	29.6	13.55	0.21	0	0.01	296.96	-2.14	-5.86	23.81	6.23853	20.0617	14.2	24.5	2.2	43.2	43.6	501																0.4225	1528.03			0.4761	13.8384			16.3097	18.6842
2019-12-28_09:00:00	2019-12-28 19:00:04	0	28.77	13.91	0.25	0	0.01	297.21	-2.04	-6.82	24.06	7.11857	16.6531	16.5	24.1	1.7	45.8	38.4	455																6.7081	1327.14			0.0016	12.7449			29.3609	29.3609
2019-12-28_10:00:00	2019-12-28 20:00:04	0.01	29.24	16.52	0.45	0	0.01	297.69	-2.8	-9.72	24.54	10.1153	16.07	18.4	23	1.2	44.4	48.7	570																3.5344	1018.89			2.3716	8.7025			79.4818	79.4818
2019-12-28_11:00:00	2019-12-28 21:00:04	0.01	33.12	19.77	0.62	0.01	0.02	297.1	0.64	-5.36	23.95	5.39807	353.191	9.6	22.2	0.4	58.7	58.2	563																103.429	1404			3.0625	3.0625			24.9807	24.9807
2019-12-28_12:00:00	2019-12-28 22:00:04	0	27.47	16.7	0.52	0.01	0.02	297.06	2.05	-2.96	23.91	3.60057	325.295	6.8	21.3	0.2	90.7	82.4	404																98.01	1878.36			6.8121	6.8121			11.5639	11.5639
2019-12-28_13:00:00	2019-12-28 23:00:04	0	25.91	15.85	0.51	0.01	0.03	296.91	1.08	-3.07	23.76	3.25443	340.619	12	20.9	0.6	196.5	50.3	408																14.8225	1520.22			8.1796	8.1796			7.04599	7.04599
2019-12-28_14:00:00	2019-12-29 00:00:04	0	29.8	19.24	0.69	0.01	0.03	296.62	-0.37	-2.52	23.47	2.54702	8.35288	9	20.7	0.5	177.2	44.5	343																104.858	1489.96			7.6729	7.6729			4.19028	4.19028
2019-12-28_15:00:00	2019-12-29 01:00:04	0	32.78	21.07	0.76	0.01	0.03	296.14	-1.74	-3.43	22.99	3.8461	26.8983	9.4	20.1	0.3	203.7	33.7	368																136.189	1322.78			8.3521	8.3521			12.5748	12.5748
2019-12-28_16:00:00	2019-12-29 02:00:04	0	29.22	17.72	0.57	0.01	0.03	295.82	-2.11	-4.81	22.67	5.25245	23.6857	4.9	19.9	1	239	28.4	332																164.352	1955.41			7.6729	7.6729			18.0833	18.0833
2019-12-28_17:00:00	2019-12-29 03:00:04	0	27.97	17.64	0.58	0.01	0.03	295.61	-1.37	-5.09	22.46	5.27115	15.0645	8.1	19.4	0.9	235.6	27.8	317																91.0116	1689.21			9.3636	9.3636			19.1069	19.1069
2019-12-28_18:00:00	2019-12-29 04:00:04	0	32.77	23.43	0.91	0.01	0.03	295.58	-0.08	-5.37	22.43	5.3706	0.853582	9.4	19.1	0.6	254.8	25.6	350																196.841	1156.68			11.0889	11.0889			22.7586	22.7586
2019-12-28_19:00:00	2019-12-29 05:00:04	0	43.71	34.51	1.49	0.01	0.03	295.67	1.27	-5.17	22.52	5.3237	346.199	9.7	18.3	0.3	267.3	22.4	355																615.536	615.536			17.8084	17.8084			25.2376	25.2376
2019-12-28_20:00:00	2019-12-29 06:00:04	0	75.18	64.58	3.03	0.01	0.04	295.99	2.02	-5.1	22.84	5.48547	338.393	7	18	0.1	279.3	22.4	347																3315.46	3315.46			23.4256	23.4256			29.0033	29.0033
2019-12-28_21:00:00	2019-12-29 07:00:04	0.01	115.32	102.41	4.95	0.02	0.04	296.43	1.01	-3.47	23.28	3.614	343.772	3.7	19.9	0.1	0.5	26.4	822																9743.66	9743.66			11.4244	11.4244			12.3482	12.3482
2019-12-28_22:00:00	2019-12-29 08:00:04	0.02	125.16	111.87	5.41	0.02	0.04	297.05	-0.03	-3.03	23.9	3.03015	0.567343	2.6	21.6	1	53.4	39.4	823																11939.9	11939.9			5.29	5.29			4.1215	4.1215
2019-12-28_23:00:00	2019-12-29 09:00:04	0.02	126.96	113.7	5.51	0.02	0.04	297.39	-1.08	-3.54	24.24	3.70108	16.9662	5.9	22	1.5	72.5	35.4	530																11620.8	11620.8			5.0176	5.0176			4.84476	4.84476
2019-12-29_00:00:00	2019-12-29 10:00:04	0.02	108.92	97	4.63	0.02	0.04	297.17	-2.82	-4.47	24.02	5.2852	32.2468	8.6	22.6	1.6	68.2	32.8	627																7814.56	7814.56			2.0164	4.1209			13.5807	13.5807
2019-12-29_01:00:00	2019-12-29 11:00:04	0.01	83.11	72.95	3.37	0.02	0.04	296.28	-4.76	-5.61	23.13	7.35729	40.3142	8.2	23.3	2.1	67.2	39.1	389																4192.56	4192.56			0.0289	3.3856			27.6391	28.5294
2019-12-29_02:00:00	2019-12-29 12:00:04	0	65.52	56.16	2.48	0.01	0.03	296.18	-5.68	-6.06	23.03	8.30578	43.1462	11.5	23.9	2.1	65.3	37.6	602																1994.52	1994.52			0.7569	5.4756			38.5117	39.5613
2019-12-29_03:00:00	2019-12-29 13:00:05	0	66.85	56.43	2.44	0.01	0.03	296.43	-5	-5.79	23.28	7.6501	40.8126	15.9	23.6	1.7	62.6	42.2	727																1642.68	1642.68			0.1024	5.2441			35.4037	35.4037
2019-12-29_04:00:00	2019-12-29 14:00:05	0.01	62.36	51.2	2.15	0.01	0.03	296.67	-3.19	-4.75	23.52	5.72177	33.8846	18.8	23.6	1.7	72.5	45.8	1105																1049.76	1049.76			0.0064	6.4009			16.1746	16.1746
2019-12-29_05:00:00	2019-12-29 15:00:05	0.03	52.29	41.09	1.65	0.01	0.02	297.12	-2.62	-5.33	23.97	5.93913	26.1769	16.4	24.6	1.5	74.9	39.3	1347																609.596	609.596			0.3969	15.8404			19.7059	19.7059
2019-12-29_06:00:00	2019-12-29 16:00:05	0.02	43.69	32.13	1.18	0.01	0.02	297.39	-4.19	-6.75	24.24	7.94472	31.8297	20	24.7	1.4	77.4	43.9	1318																147.137	216.384			0.2116	18.9225			42.8334	42.8334
2019-12-29_07:00:00	2019-12-29 17:00:05	0.02	37.26	23.78	0.72	0	0.01	296.96	-4.45	-4.19	23.81	6.11217	46.7238	17	23.2	1.2	61	40.1	764																45.9684	679.124			0.3721	5.8564			24.1294	24.1294
2019-12-29_08:00:00	2019-12-29 18:00:05	0.02	36.44	22.31	0.63	0.01	0.02	297.04	-0.81	-1.55	23.89	1.74889	27.5908	13	23	0.9	101.1	38.9	419																86.6761	994.141			0.7921	5.29			0.720606	2.15243
2019-12-29_09:00:00	2019-12-29 19:00:05	0.03	34.58	22.43	0.68	0.01	0.02	297.17	-2.01	-3.86	24.02	4.35198	27.5072	12.1	22.9	0.6	55.3	41.8	434																106.709	1043.94			1.2544	5.4289			14.0773	14.0773
2019-12-29_10:00:00	2019-12-29 20:00:05	0.01	30	18.69	0.51	0.01	0.02	297.04	-2.69	-5.92	23.89	6.5025	24.4368	11.3	22.1	0.7	53.7	47.5	435																54.6121	1357.92			3.2041	3.2041			33.669	33.669
2019-12-29_11:00:00	2019-12-29 21:00:05	0	25.4	14.67	0.33	0	0.01	297.33	-3.61	-8.29	24.18	9.04191	23.5315	13.4	21.8	0.9	31.3	40.9	489																1.6129	1503.11			5.6644	5.6644			66.2908	66.2908
2019-12-29_12:00:00	2019-12-29 22:00:05	0	25.2	13.38	0.24	0	0.01	297.22	-0.83	-7.31	24.07	7.35697	6.47788	15.3	21.8	1	13.8	34.4	584																3.6864	1456.19			5.1529	5.1529			40.4111	40.4111
2019-12-29_13:00:00	2019-12-29 23:00:05	0	23.89	12.87	0.24	0.01	0.02	297.18	0.28	-6.56	24.03	6.56597	357.556	10.5	21.8	0.8	8	33.5	632																5.6169	1889.64			4.9729	4.9729			33.2464	33.2464
2019-12-29_14:00:00	2019-12-30 00:00:05	0.01	22.73	13.34	0.3	0.01	0.03	297.33	2.88	-5.3	24.18	6.03195	331.481	7.8	22	0.6	23.2	35.4	745																30.6916	2088.49			4.7524	4.7524			29.5061	29.5061
2019-12-29_15:00:00	2019-12-30 01:00:05	0.02	26.25	18.1	0.58	0.01	0.03	297.28	3.01	-3.49	24.13	4.60871	319.223	5	21.4	0.3	343.4	28.6	854																171.61	1913.19			7.4529	7.4529			18.565	18.565
2019-12-29_16:00:00	2019-12-30 02:00:05	0.04	34.81	26.63	1.02	0.01	0.03	297.22	1.72	-2.97	24.07	3.4321	329.924	10.3	20.3	0.4	229.1	24.8	488																266.669	894.608			14.2129	14.2129			9.19362	9.19362
2019-12-29_17:00:00	2019-12-30 03:00:05	0.06	43.54	34.85	1.43	0.01	0.03	296.89	0.8	-3.53	23.74	3.61952	347.231	16.5	19.5	0.4	251.8	30.7	423																336.723	336.723			17.9776	17.9776			10.3653	10.3653
2019-12-29_18:00:00	2019-12-30 04:00:05	0.07	46.64	37.4	1.54	0.01	0.03	296.7	0.49	-4.59	23.55	4.61608	353.907	23.2	18.9	0.4	258.3	38.8	521																201.64	201.64			21.6225	21.6225			17.7753	17.7753
2019-12-29_19:00:00	2019-12-30 05:00:05	0.07	46.59	37.39	1.54	0.01	0.03	296.49	0.49	-5.17	23.34	5.19317	354.586	25	18.4	0.3	271.9	33.1	551																153.512	153.512			24.4036	24.4036			23.9431	23.9431
2019-12-29_20:00:00	2019-12-30 06:00:05	0.06	48.1	39.36	1.65	0.01	0.03	296.47	0.59	-5	23.32	5.03469	353.27	20.6	18.3	0.2	294.3	30.6	849																351.938	351.938			25.2004	25.2004			23.3742	23.3742
2019-12-29_21:00:00	2019-12-30 07:00:05	0.06	47.14	38.96	1.64	0.01	0.03	296.72	0.04	-4.45	23.57	4.45018	359.485	9.3	19.9	0	288.8	39.8	598																879.716	879.716			13.4689	13.4689			19.8041	19.8041
2019-12-29_22:00:00	2019-12-30 08:00:05	0.05	43.33	35.56	1.47	0.01	0.03	297.08	-1.03	-3.82	23.93	3.95643	15.0901	9.5	21.6	0.9	71.8	45.1	526																679.124	679.124			5.4289	5.4289			9.34173	9.34173
2019-12-29_23:00:00	2019-12-30 09:00:05	0.03	37.86	29.98	1.18	0.01	0.04	296.69	-3.31	-4.57	23.54	5.64278	35.9155	13.3	22	1.5	65	44.8	508																278.222	555.074			2.3716	2.3716			17.1627	17.1627
2019-12-30_00:00:00	2019-12-30 10:00:05	0.02	34.49	26.09	0.97	0.01	0.03	295.91	-4.74	-5.71	22.76	7.42103	39.6969	12.9	22.5	1.6	64.2	39.9	463																173.976	775.623			0.0676	0.4489			33.8844	33.8844
2019-12-30_01:00:00	2019-12-30 11:00:05	0.01	34.26	25.31	0.92	0.01	0.03	295.88	-5.16	-6.4	22.73	8.22105	38.8776	14.9	23.3	2	65.2	39.5	537																108.368	709.157			0.3249	2.0736			38.7014	38.7014
2019-12-30_02:00:00	2019-12-30 12:00:05	0.02	38.44	28.48	1.05	0.01	0.02	296.12	-5.6	-6.85	22.97	8.84774	39.2667	12.2	23.9	2.2	68.1	38	1325																265.038	684.346			0.8649	5.1984			44.1924	48.049
2019-12-30_03:00:00	2019-12-30 13:00:05	0.05	47.68	36.2	1.4	0.01	0.02	296.55	-5.8	-7.36	23.4	9.37068	38.2398	10.2	24.6	2.4	69.7	39.6	1929																676	676			1.44	11.6281			48.5903	58.5941
2019-12-30_04:00:00	2019-12-30 14:00:05	0.07	47.96	33.3	1.18	0.01	0.02	296.82	-5.77	-7.65	23.67	9.58204	37.0255	8.5	24.5	2.5	68.4	35.7	1941																615.04	627.002			0.6889	12.8164			50.1552	63.4577
2019-12-30_05:00:00	2019-12-30 15:00:05	0.09	41.96	24.68	0.7	0	0.01	297.31	-5.61	-7.85	24.16	9.64855	35.5516	11.2	24.1	2.1	59.5	35.1	2945																181.71	958.522			0.0036	13.4689			56.9807	58.2559
2019-12-30_06:00:00	2019-12-30 16:00:05	0.08	40.11	21.62	0.53	0	0.01	297.52	-4.24	-7.28	24.37	8.42473	30.2174	15.9	23.8	1.8	63.3	51.6	3367																32.7184	859.662			0.3249	12.8164			43.887	43.887
2019-12-30_07:00:00	2019-12-30 17:00:05	0.11	41.5	22.23	0.56	0	0.01	297.21	-0.42	-2.95	24.06	2.97975	8.10299	21.5	23.9	1.4	65.4	68.4	868																0.5329	534.072			0.0256	11.3569			2.4956	2.4956
2019-12-30_08:00:00	2019-12-30 18:00:05	0.13	38.33	20.98	0.54	0	0.01	297.36	-2.49	-4.6	24.21	5.23069	28.427	20.7	23.5	1.2	58.5	86.5	560																0.0784	633.026			0.5041	9.7344			16.2464	16.2464
2019-12-30_09:00:00	2019-12-30 19:00:05	0.06	34.84	16.83	0.32	0	0.01	297.18	-3.12	-6.08	24.03	6.8338	27.1651	24.9	22.6	1.1	60.5	86.6	593																65.1249	630.512			2.0449	4.1616			32.8764	32.8764
2019-12-30_10:00:00	2019-12-30 20:00:05	0.02	33.65	14.03	0.14	0	0.01	297.06	-3.38	-7	23.91	7.77331	25.774	23.9	22	0.8	44.2	66.7	648																97.4169	835.788			3.6481	3.6481			48.6271	48.6271
2019-12-30_11:00:00	2019-12-30 21:00:05	0.02	34.29	13.85	0.12	0	0.01	297.1	-3	-9.29	23.95	9.76238	17.8968	20.6	21.3	0.5	36.8	74.9	692																45.5625	1049.11			7.0225	7.0225			85.7917	85.7917
2019-12-30_12:00:00	2019-12-30 22:00:05	0.03	32.38	14.26	0.2	0.01	0.02	297.19	2.44	-5.32	24.04	5.85286	335.362	14.7	20.9	0.1	246.5	65.7																	0.1936	1434.89			9.8596	9.8596			33.0954	33.0954
2019-12-30_13:00:00	2019-12-30 23:00:05	0.15	38.36	25.3	0.93	0.01	0.02	297.88	3.24	-4.38	24.73	5.44812	323.509	13.2	20.4	0.1	175.2	51.4	366																146.41	803.156			18.7489	18.7489			28.6024	28.6024
2019-12-30_14:00:00	2019-12-31 00:00:05	0.28	57.91	46.03	2.13	0.01	0.02	298.64	3.7	-5.38	25.49	6.5295	325.482	14.9	19.9	0.1	300.6	38.7	525																969.077	969.077			31.2481	31.2481			41.3385	41.3385
2019-12-30_15:00:00	2019-12-31 01:00:05	0.34	65.54	53.29	2.5	0.01	0.02	298.61	3.47	-6.56	25.46	7.42122	332.123	13.6	19.2	0.3	251.5	48.3	658																1575.3	1575.3			39.1876	39.1876			50.7118	50.7118
2019-12-30_16:00:00	2019-12-31 02:00:05	0.43	73.39	61.18	2.88	0.01	0.02	298.11	3.39	-5.81	24.96	6.72668	329.737	13.5	18.5	0.4	256.5	37	643																2273.38	2273.38			41.7316	41.7316			40.0269	40.0269
2019-12-30_17:00:00	2019-12-31 03:00:05	0.39	58.33	48.35	2.22	0.01	0.02	298.13	3.45	-5.21	24.98	6.24873	326.488	15.3	18.1	0.3	274.7	38.3	796																1092.3	1092.3			47.3344	47.3344			35.3874	35.3874
2019-12-30_18:00:00	2019-12-31 04:00:05	0.28	42.74	34.5	1.57	0.01	0.01	298.23	3.9	-4.37	25.08	5.85721	318.253	19.4	17.8	0.4	260.3	40.6	944																228.01	228.01			52.9984	52.9984			29.7811	29.7811
2019-12-30_19:00:00	2019-12-31 05:00:05	0.2	33.44	26.16	1.19	0	0.01	298.36	4.37	-3.37	25.21	5.5185	307.638	12.9	17.5	0.2	276.2	39.4	740																175.828	771.728			59.4441	59.4441			28.2864	28.2864
2019-12-30_20:00:00	2019-12-31 06:00:05	0.18	26.97	20.57	0.92	0	0.01	299	5.68	-3.4	25.85	6.61985	300.904	12.8	19.2	0.8	30.7	83.9	669																60.3729	1120.24			44.2225	44.2225			33.8706	33.8706
2019-12-30_21:00:00	2019-12-31 07:00:05	0.17	23.99	18.18	0.83	0	0	299.28	4.85	-3.78	26.13	6.14906	307.932	18.2	21.7	0.9	37.4	111	575																0.0004	927.812			19.6249	19.6249			27.5526	27.5526
2019-12-30_22:00:00	2019-12-31 08:00:05	0.13	20.15	15.13	0.69	0	0	300.17	5.58	-3.94	27.02	6.83081	305.226	34.7	24.5	1.4	79.7	94.6	749																382.985	382.985			6.3504	48.0249			29.4937	29.4937
2019-12-30_23:00:00	2019-12-31 09:00:05	0.07	15.67	11.8	0.53	0	0.01	300.54	4.47	-3.76	27.39	5.8411	310.069	45.3	28.4	1.4	97.2	98.3	1026																1122.25	1122.25			1.0201	125.44			19.7234	19.7234
2019-12-31_00:00:00	2019-12-31 10:00:05	0.04	11.39	8.53	0.37	0	0.01	300.98	1.86	-4.34	27.83	4.72178	336.801	83.9	32.8	1.5	81.6	168.3	1128																5680.64	5680.64			24.7009	257.282			10.3799	10.3799
2019-12-31_01:00:00	2019-12-31 11:00:05	0.06	10.39	7.49	0.29	0	0.01	300.83	-0.15	-4.55	27.68	4.55247	1.88827	107	32.9	2	73.1	140.1	1637																9902.24	9902.24			27.2484	255.68			6.51511	6.51511
2019-12-31_02:00:00	2019-12-31 12:00:05	0.11	14.02	9.66	0.35	0	0.01	300.15	-1.26	-4.62	27	4.78874	15.2552	85.9	29	2.7	76.1	151	1789																5812.54	5812.54			4	130.188			4.36282	11.3754
2019-12-31_03:00:00	2019-12-31 13:00:05	0.16	20.59	14.49	0.58	0	0.01	299.57	-1.71	-4.45	26.42	4.76724	21.0203	70.6	27.2	2.2	67.7	123.6	2002																3148.33	3148.33			0.6084	81.5409			6.59073	8.12958
2019-12-31_04:00:00	2019-12-31 14:00:05	0.18	24.99	17.76	0.73	0	0.01	299.42	-1.66	-4.19	26.27	4.50685	21.6126	67.2	27.3	2.3	50.5	111.3	1901																2444.31	2444.31			1.0609	80.6404			4.87019	7.24068
2019-12-31_05:00:00	2019-12-31 15:00:05	0.21	31.86	23.05	0.99	0	0.01	299.76	-1.62	-4.25	26.61	4.54829	20.8658	57.7	26	2	63.6	121.5	1743																1200.62	1200.62			0.3721	64.3204			6.49376	6.49376
2019-12-31_06:00:00	2019-12-31 16:00:05	0.19	38.63	27.66	1.2	0	0.01	299.88	-1.82	-4.71	26.73	5.04941	21.1272	57.1	24.5	1.5	152.3	112.5	1710																866.714	866.714			4.9729	44.0896			12.5983	12.5983
2019-12-31_07:00:00	2019-12-31 17:00:05	0.12	42.88	30.15	1.32	0	0.01	299.7	-2.06	-5.21	26.55	5.60247	21.5736	52.5	21.9	5.3	173.7	151.6	1956																499.523	499.523			21.6225	21.6225			0.0914897	46.0562
2019-12-31_08:00:00	2019-12-31 18:00:05	0.06	40.07	26.85	1.12	0	0.01	299.56	-2.55	-6.2	26.41	6.70392	22.357	41.8	20.6	5.5	176	96	2701																223.502	223.502			33.7561	33.7561			1.44942	65.4144
2019-12-31_09:00:00	2019-12-31 19:00:05	0.39	91.44	39.86	0.76	0	0.01	296.42	4.27	13.37	23.27	14.0353	197.712	31.1	20.1	4.4	177.3	68.9	3599																76.7376	76.7376			10.0489	10.0489			92.8391	205.043
2019-12-31_10:00:00	2019-12-31 20:00:05	0.22	85.56	32.23	0.31	0	0	293.19	3.43	12.45	20.04	12.9138	195.403	28.3	20.1	3.8	182.2	60.1	3143																15.4449	39.8161			0.0036	19.8025			83.0622	158.706
2019-12-31_11:00:00	2019-12-31 21:00:05	0.22	75.06	27.6	0.23	0	0	292.93	3.24	11.72	19.78	12.1596	195.453	16.7	19.8	2.8	192	44	3092																118.81	508.052			0.0004	25.1001			87.6022	117.584
2019-12-31_12:00:00	2019-12-31 22:00:05	0.29	69.52	26.16	0.29	0	0	292.94	2.81	10	19.79	10.3873	195.695	16.7	19.7	2.4	196.5	43	2303																89.4916	575.04			0.0081	26.01			63.797	75.1915
2019-12-31_13:00:00	2019-12-31 23:00:05	0.32	67.94	27.25	0.43	0	0	292.66	3.34	8.61	19.51	9.23513	201.202	17.9	19.6	2.5	194.2	38.6	1953																87.4225	470.456			0.0081	30.0304			45.362	58.0512
2019-12-31_14:00:00	2020-01-01 00:00:05	0.32	67.35	28.79	0.55	0	0	292.33	3.77	7.81	19.18	8.67231	205.767	16.7	19.3	1.8	197.1	42.3	1724																146.168	455.823			0.0144	37.3321			47.2287	47.2287
2019-12-31_15:00:00	2020-01-01 01:00:05	0.31	71.02	33.89	0.86	0	0	291.74	4.25	9.12	18.59	10.0617	204.986	10.6	19	1.8	201.4	34.4	1829																542.424	542.424			0.1681	49			68.2549	68.2549
2019-12-31_16:00:00	2020-01-01 02:00:05	0.25	67.92	33.72	0.93	0	0	291.56	4.02	8.51	18.41	9.41172	205.285	14.2	18.6	1.9	204.3	39.5	1887																381.03	381.03			0.0361	57.4564			56.426	56.426
2019-12-31_17:00:00	2020-01-01 03:00:05	0.2	73.18	40.24	1.3	0	0.01	291.15	3.61	8.01	18	8.78591	204.26	23.6	18.7	1.6	225.1	51.4	770																276.89	276.89			0.49	62.2521			51.6373	51.6373
2019-12-31_18:00:00	2020-01-01 04:00:05	0.28	78.58	47.17	1.66	0	0.01	291.13	2.36	5.37	17.98	5.86571	203.724	46.3	18.6	1.6	230.1	58.9	473																0.7569	709.157			0.3844	64.1601			18.1962	18.1962
2019-12-31_19:00:00	2020-01-01 05:00:05	0.33	83.23	52.93	1.97	0.01	0.01	291.43	2.17	5.76	18.28	6.1552	200.643	54.2	18.7	1.5	230.7	50.9	328																1.6129	1623.28			0.1764	57.9121			21.6709	21.6709
2019-12-31_20:00:00	2020-01-01 06:00:05	0.4	82.23	52.93	1.97	0.01	0.01	291.76	1.6	4.47	18.61	4.74773	199.694	36.1	19	1.5	229.5	52	399																283.249	492.396			0.1521	48.7204			10.5477	10.5477
2019-12-31_21:00:00	2020-01-01 07:00:05	0.46	79.82	51.21	1.87	0.01	0.01	292.3	0.56	3.31	19.15	3.35704	189.603	28.1	19.6	1.4	224.2	48.5	308																534.072	534.072			0.2025	34.1056			3.83	3.83
2019-12-31_22:00:00	2020-01-01 08:00:05	0.47	83.24	54.69	2.05	0.01	0.01	292.63	-1.14	3	19.48	3.2093	159.193	12.8	20.2	1.5	183.5	49.3	213																1754.77	1754.77			0.5184	24.1081			2.9217	2.9217
2019-12-31_23:00:00	2020-01-01 09:00:05	0.39	92.7	63.65	2.52	0.01	0.01	292.58	-1.76	4.36	19.43	4.70183	158.017	15.1	20.8	0.7	195	61.9	210																2357.1	2357.1			1.8769	19.0096			16.0146	16.0146
2020-01-01_00:00:00	2020-01-01 10:00:05	0.33	84.62	56.33	2.12	0.01	0.01	292.72	-2.19	3.6	19.57	4.2138	148.686	29.9	21.5	2.5	117.1	90.8																	698.545	698.545			3.7249	12.3904			2.93711	6.74856
														42	22.1	2.6	118.9	79.9																	895788	2.11499e+06			13116.2	41882.8			16784.1	24285.2
														45	22.3	2.6	137.3	87.7
														47.9	22.4	3.1	137.9	92.1
														76.5	22.6	3	145.6	167.1
														93.4	22.3	2.9	143.1	79.2
														42.6	22.1	2.6	138.7	41.6
														20.3	21.6	2.3	153.6	40.3
														16.8	21.5	2.6	166.4	43.5
														15.9	21.1	2.6	172.6	46.9
														22.1	21	1.6	184	46.4
														25.2	20.6	1.6	194.4	33.2
														24.5	20.2	1.8	212.9	30.5
														23.7	20.2	1.7	207.8	38.1
														24.5	20.2	1.7	209.9	39.1
														27.9	20	1.7	226.1	45.3
														33.1	19.8	1.4	236.3	50.4
														42.4	19.6	1.1	243	55.1
														44.6	19.2	1.1	235.2	64.2
														46.1	18.4	1.2	236.1	75.2
														54.4	18.7	1.2	236.4	88.7
														76.9	19.6	1.2	235.6	114.4
														81	20.4	0.7	197.4	92.8
														58.2	21.1	1.3	140.4	69.2
														35.9	21.9	1.1	91.5	57.3
														34.9	21.9	1.4	80.6	68.6
														46.2	22.5	1.7	84.5	86.7
														57.1	22.7	1.8	72	97.6
														68.8	23.5	2.4	75.8	44.2
														37.5	23.7	2.4	74	13.5
														18.2	23.4	2.2	71.2	29.8
														11.1	23.1	1.8	82	38.8
														14.5	22.4	1.9	96.6	40
														19.3	22.1	1.7	116.1	53.6
														25.1	22.1	1.4	122.4	55
														28	22.2	1.5	124.3	65.9
														43.8	22.1	1.5	115.5	81.2
														50.1	22.1	1.2	76.3	72.6
														50.8	22.1	1.2	104.4	65.5
														41.8	22	0.9	110.7	55.1
														37.5	21.9	1	118.2	43.2
														34.8	21.9	0.5	137.6	38.7
														31.9	21.6	0.8	255	50.6
														28	21.6	0.8	251.5	49
														29.8	21.2	0.7	243.8	45.8
														30.8	22.2	0.3	262	46.1
														30.1	23.4	0.9	84.3	57.1
														33.4	23.6	1.5	77.1	53.1
														34.1	24.6	2.2	84.3	38.1
														32.3	25.4	2.2	74.8	51.8
														22.2	25.4	2.5	64.5	64.1
														25.6	25.6	2.6	63.9	46.7
														24.7	26.5	3.2	59.5	33.5
														15.2	25.9	3.1	50.7	33.6
														10.2	25.9	3.1	41.1	16
														8.4	25	3	41.4	28.2
														8.5	24.8	2.7	40.7	11.8
														11.4	25.1	1.8	34.4	19.4
														11.6	24.3	1.4	52.2	52.7
														4.7	23.6	1.5	53.5	41
														5.7	23.2	1.4	35.7	20.9
														6	22.8	1.1	39	22.3
														9.4	22.5	0.8	40.9	21.4
														7.3	22.2	0.8	40.8	23.6
														6.5	21.8	0.7	20.8	17
														13.2	21.4	0.2	345.6	19.6
														12	20.8	0.4	357.5	8.4
														15.8	20.6	0.5	37.5	22.3
														14.6	21.4	0.2	62.3	36.3
														7.3	23.3	1.1	88.1	42
														15.6	26.9	0.9	106.5	43.2
														30.3	28	2	89.8	63.9
														34	29.4	1.7	93	58.8
														32.2	33.1	2	84.4	57.9
														38.7	31	2.8	76.5	76.7
														37.3	29.8	2.7	66	68.7
														39.7	28.6	2.1	63.3	79.3
														41.4	27.5	1.6	62.7	72.7
														39.5	27.7	1.4	63.4	74.1
														44.2	29.1	1.4	56.9	90.9
														39.3	29	0.7	75.7	93.3
														42.7	28.8	0.2	144.9	104.9
														60.3	28.2	3.9	191.8	247.3
														107.1	26	3.7	192.4	147.5
														98.9	24.7	3.6	201.1	133.1
														95.4	23.8	3.1	203	125.3
														87.7	23.3	2.3	195.6	84.8
														71.5	22.9	2.4	205.7	66.3
														55.8	22.8	2.1	211.9	46.5
														38.9	23.1	1.9	211.1	31.8
														23.6	22.9	2.2	199.8	66.5
														21.9	21.9	2.6	183.5	81.2
														16.2	20.9	2.4	183.2	79.3
														6.7	20.9	2.3	185.7	78
														5.6	21.6	2.3	191	76.5
														11.2	22.6	2.9	180	76.9
														37.3	22.7	2.9	173.5	136.9
														73.5	22.3	3.9	171.1	145.7
														77	22	4.2	170.6	104.7
														57.3	21.9	4.6	171.8	85.7
														46.1	20.8	3.6	171.5	87.9
														49.7	20.1	2.9	179.6	81.4
														44.4	20.7	4.7	171.7	41.3
														36.4	20.5	3.5	169.9	47.4
														30.2	20.3	3.5	171.3	40.4
														15.5	20.4	2.7	169	37.9
														12.5	19.6	2	170	46.6
														12.3	19.6	1.8	159.4	31.6
														13.6	19.3	1.3	213.2	35.9
														8.2	18.5	1.3	242.1	23.2
														7.2	18.4	1.4	245.4	19.9
														8.8	18.6	1.2	243.1	23.1
														9.6	18.7	1.1	241.4	25.4
														9.6	18.6	0.9	231.2	22.6
														8.4	18.6	1.1	244.3	22.3
														14.6	18.7	0.9	236.7	23.1
														13.9	18.7	1.5	243.4	28.2
														13.2	19.4	0.6	234	31.2
														13.3	19.5	1.4	252.5	33.7
														9	20.4	0.9	242.8	38.1
														10.7	22.4	1.7	64.7	36.4
														12	22.2	1.6	66.4	43
														8.1	22.5	2	65.8	42.8
														12.6	22.5	2.4	52.2	34.7
														20	22.8	2.3	41.6	46.9
														14.8	22.3	1.9	59	45.9
														14.5	21.9	1.8	64.3	42.3
														10.2	21.5	1.9	75.8	40.2
														10.7	21.6	1.4	59.6	41
														10.9	21.5	1.3	65.1	46.5
														10.4	21	0.8	48.1	28.7
														11.3	21	1.7	95.3	21.2
														8.5	20.7	1.4	71.4	15.2
														2.6	20.5	1.9	31.2	6.8
														4.8	20.5	1.5	338.3	2.4
														7.9	21	1.6	354.8	-0.4
														3.4	20.8	0.8	19.1	2.5
														3.4	20.9	1.3	247.5	11.5
														3.7	20.4	0.9	23.4	6.3
														1.6	20.1	0.7	2.9	10.6
														2.9	21.1	0.9	8.3	10.4
														12.8	22	1.6	32.8	36.2
														23.4	23.1	1.8	343.4	41.3
														17.4	24.2	1.1	17.1	24.6
														12.8	24	1.9	61.4	43.7
														11.2	24.4	2.6	60.6	27.7
														9.7	25.1	2.7	63.2	24.1
														8.4	26.1	2.6	68.8	31.5
														12.3	25.4	2.7	71.2	27.2
														21.8	25.1	2.1	85.7	39.2
														24.9	24.5	2.1	84.7	39.1
														22.8	23.9	1.4	70.3	43.8
														18.3	23.9	1.3	77	44.7
														22.4	23.9	1	114.3	42.8
														21.2	23.3	1.6	164.5	50
														22.5	23.7	1.6	177	53.7
														31.9	23.7	2.4	179	50.2
														30.9	23.3	1.6	172.3	51
														26.8	22.1	1.4	209.8	39.3
														24.8	22	0.8	199.8	31.4
														31.9	22	1.3	227.1	30.6
														30.2	21.8	1	185.5	35.9
														33.3	21.6	0.6	208.3	62.6
														46.2	21.1	0.8	228.3	67.6
														62.8	21.1	1.2	228.5	94
														86	22	1.4	189	147.9
														128.9	22.7	1.6	186.4	177.1
														149.6	23.9	2.3	178.4	186.1
														149.8	24.6	3.5	164.7	193
														134.8	24.7	3.4	157.9	158.8
														134.5	24.3	3.7	159.9	180.3
														146.6	24	3.7	172.2	198.1
														168.6	23.5	4.4	173.6	203.5
														171.2	23.9	3.6	164.3	193.2
														154.3	23.5	3.5	166.9	158.6
														134.4	23.1	3.5	173.7	138.4
														109.4	22.7	2.9	175.5	112.5
														89.4	22.6	2.2	188.6	98.1
														91.8	22.2	1.6	211.7	101.7
														91.2	22.2	1.6	210.8	97.4
														92.9	21.7	1.6	219.7	89.4
														83.7	21.5	1.5	231.8	82.5
														75.3	21.4	1.4	232.8	80.1
														70.9	21.2	1.1	225.6	69.9
														66.6	20.6	1	217.2	67.2
														52.6	20.9	1.4	207.3	34.5
														23.9	21	1.5	193.8	13.7
														11.4	21.2	1.4	196.1	3.1
														6.3	21.1	1.8	183.8	10.5
														7.9	21.4	1.8	202.7	-4.7
														7.9	21.7	1.8	192.3	0.1
														1.2	22.5	1.3	207.8	-1.2
														1.3	23.1	1.9	181	6.9
														2.8	22.8	2.5	158.9	9.2
														4.3	23.6	2.2	162.8	20
														9.7	23	2.3	151.9	15.6
														6	23.8	2.5	155	7.9
														1.1	23.6	2.7	148	12.6
														0.2	23.3	2.5	155.6	2.5
														0.5	23.1	2.3	150.9	11.5
														4.4	22	2	154.2	9.3
														1.9	21.5	0.6	216.9	12.7
														-1.4	21.4	1.1	247.2	5.3
														2.2	21.4	1.2	245.6	2.2
														6	21.5	1	241.9	0.5
														5.6	21.5	1.2	240.1	3.5
														1.6	21.5	1	249.7	-3.3
														5.2	21.5	0.7	238.6	2
														4.3	21.5	0.6	245.8	4.1
														3.9	21.6	0.1	199.7	4
														0.5	21.7	0.2	0	4.6
														0.6	21.8	0.3	30.6	14
														4.5	21.9	0.2	73.9	47.9
														8.3	22.2	0.7	66.1	35.8
														7.7	22.9	1.2	62.8	34.2
														8.3	24.3	1.6	46.4	13.1
														4.5	24.3	2.4	57.8	30.5
														6.7	25.3	3.8	51.1	21.1
														9.5	25.8	3.5	45.7	23
														6.1	25.9	4.2	47.3	23.3
														11.4	26.4	4.5	54.3	31.7
														14	26.7	3.8	39.8	23
														18.6	26.9	3.6	18.8	37.1
														18.3	27.3	2.5	24.7	39.1
														22.7	27.2	1.9	31.8	42
														23.2	26.1	1.3	56.4	66.5
														26.2	25.6	0.7	61.8	73
														22	25.4	0.4	38.8	63.5
														20.9	24.9	0.1	36.4	60.9
														22	24.3	0.4	98.9	80.6
														23.5	24	2.3	173.5	71.1
														53.7	22.5	3.1	190.4	93.1
														65.1	21.6	3	199.6	75.4
														123.1	20.7	2.7	189.4	277.2
														191.9	20.1	2.3	203.6	182.1
														131.5	19.6	2.9	194.8	59.7
														66.2	18.4	2.5	180.8	33.2
														47.6	18.1	2.3	188.8	35.4
														31.2	18.2	1.9	211.3	13
														19.4	19.1	2.2	210.3	11.5
														26.4	19.6	2.1	185.7	32.5
														21.3	19.9	2.4	172.3	29.1
														29.9	20.5	2.9	163.8	67.2
														37.5	20.9	2.6	161.7	57.5
														42.6	21.4	2.6	165.5	51.8
														43.3	21.1	2.3	154.7	44.6
														33.9	21.3	2	135.2	44.4
														31.1	21	2.1	136.9	44.7
														24.5	20.9	1.8	142.3	51.9
														24.5	20.8	1.4	141.3	48.6
														17.9	20.8	1.8	143.3	43.5
														20.4	20.7	2	142.9	45.2
														21.9	20.6	1.7	149.5	44.5
														20.9	20.4	1.9	154.2	38.9
														21	20.1	2.3	154.1	28
														23	20	2	157.6	46.4
														29	20	1.9	159.4	48.7
														29.9	20	1.7	153.4	54.4
														34.2	20	1.9	161.7	66
														34.9	17.8	1.9	240.5	101
														53.7	17.5	1.7	250	104.5
														76.3	18.2	1.7	240.8	118.2
														92.5	19.1	1.8	236.9	137.7
														112.4	19.8	1.6	208.5	147.5
														107.9	20.1	2	198.3	96.2
														86.8	19.5	1.5	205.7	80.2
														70.9	19.2	2	233.6	64.6
														67.9	19.3	1.9	215.6	87.1
														80	19.4	1.8	224.3	76.8
														83.6	19.6	1.7	220	107.3
														100.4	19.4	1.8	205.3	112.6
														96.4	19.2	1.6	219	83.1
														73.9	19.6	1.5	186.7	67.1
														53.4	19.9	1.7	177.3	66.8
														38.7	19.6	1.8	172.9	70.2
														25.8	19.4	1.2	203.9	41.3
														29.1	19.2	1.3	216.9	41.7
														34.1	19	1.6	233.1	45.7
														41.4	18.8	1.9	240.6	52
														43	18.6	1.4	232.2	52.9
														43.5	18.6	1.9	237.8	53
														43.3	18.6	1.9	234.4	53.4
														55.3	18.7	1.8	238.8	69.9
														68.9	18.5	1.5	241.8	99.4
														95.3	18.3	1.5	241.8	119.7
														107.6	18.5	0.9	222.5	135.5
														110.4	18.8	1.4	247.4	135.1
														108.3	19.5	1.7	239.6	121.2
														92.5	20.6	1.1	230.3	99.3
														66.7	22.4	2.4	117	90.7
														60.5	22.3	2.4	124.3	69.1
														46.3	22.7	2.2	84.7	33.7
														23.5	22.3	2	82.4	30.7
														17.2	22.9	1.9	84.1	24.6
														17.6	23.3	2	66.4	2.4
														11.5	23	2.1	61.8	9.5
														8.1	22.8	1.9	60.2	29.8
														2.3	22.2	2	44.3	24.6
														0.2	21.8	2.2	41.5	27.7
														5.8	21.5	1.7	25.8	8.6
														8.8	20.7	0.9	351.8	10.3
														8.2	20.2	0.8	346.2	14.6
														5.9	20.2	1.2	339.3	13.9
														1.6	20.2	1.4	350.5	10.6
														2.4	19.6	0.7	1.2	9.6
														4.4	19.6	0.9	327.2	10.6
														3.6	18.5	0.4	299	5.8
														-2.9	19.4	1.1	321.8	19
														-4.8	19.6	0.6	302.7	16.4
														0.4	21.2	1.3	337.1	18.3
														0.5	22.9	0.8	42.4	22.5
														6.3	23.7	2	83	31.4
														-0.8	23.8	2.5	88.3	47.3
														13.8	24.1	2.6	71.1	224.2
														15.2	24.3	2.7	59.3	20.7
														10.5	24.6	2.6	53.9	11.9
														5.9	24.9	2.5	59.9	17.4
														7.3	24.5	2.6	56.5	10
														6.3	24.1	2.6	56	7.8
														3.9	23.9	1.9	59.8	14.7
														6.8	23.4	1.5	60.4	9.8
														2.1	22.9	1.1	49.1	15.2
														7.7	22.7	0.8	48.3	24.6
														1.7	22.2	0.5	49.7	32.1
														0.8	21.3	0.3	266.4	16
														6	20.5	0.3	256.7	0.8
														3.6	19.5	0.4	258.1	-0.7
														5.7	18.7	0.3	260.1	-0.7
														3.9	18.2	0.3	270.9	0.4
														4.5	17.8	0.3	271.4	-0.3
														4.4	17.5	0.4	273.1	2.8
														7.9	17.1	0.3	270.4	4.5
														8.2	17.3	0.2	285.6
														-0.6	19.2	0.2	242.5
														-1.2	22.2	0.6	31.5	11.9
														8	23.6	1.6	16.4	8.6
														14.4	24.1	1.9	77.6	13.2
														9.3	24.1	2.3	75.6	13.4
														4.5	24.2	2.8	56.6	13
														7.9	24.3	3.3	52.3	13.5
														12.2	24.5	3.3	55.8	14.9
														11.8	24.6	3.1	51.5	14.4
														10.8	24.3	3.2	41.8	18.5
														5.6	24.2	2.6	43.7	22.4
														2.8	23.8	2.7	38.5	21.6
														-0.7	23.6	2.4	36.2	28.7
														3.4	23.4	1.2	30.1	21.9
														3.2	23.4	0.4	26.2	22
														9.8	23.5	0.3	28.3	17.6
														4.1	23.2	0.8	50.3	33.6
														4.6	22.9	1.1	53	27.5
														2.3	22.9	0.9	23.8	23.7
														6.6	22.5	0.4	234.9	17.9
														3.1	22.2	0.7	207.3	14.7
														6.7	22.4	0.5	6.9	19.7
														12.7	22.2	0.6	223.4	31.4
														13.8	21.8	0.5	245.9	18.7
														17.3	20.9	0.7	14.1	30.3
														21.2	21.1	0.1	137.6	40.1
														22.8	23.2	0.2	105.1	44.1
														28.3	25	0.2	88	29.5
														26.8	26.6	0.7	33.8	28.1
														27.4	27.6	0.9	16.7	31.7
														24.5	29.2	1.3	46.6	34.7
														22.7	27.2	1.9	72.7	46.5
														20.1	25.5	2.5	51.4	45.4
														18.1	23.8	1.9	254.9	45.7
														27.5	19.6	1.8	255.2	26.2
														19.2	19.3	0.8	350.5	20.5
														11.6	19.7	0.7	229.2	24.3
														11.4	20.2	1.5	228.5	27.1
														13.7	21.2	1.2	228.9	38.3
														24.3	21.3	1.3	235.5	49.4
														32.9	21.3	1.4	233.5	57.4
														44.6	21.7	1.8	219.5	80.7
														51.2	21.5	1.9	218.6	54.3
														33.8	20.3	2.3	225.3	20.3
														22	20.2	2.3	219.5	40.2
														23.8	19.5	2.6	218	34.5
														19.8	19	2.2	224.8	25.3
														16.7	18.4	2.2	228.4	15
														15.9	18.1	2.2	224.8	16.5
														23.7	17.9	2.2	224.3	49.2
														46.3	17.5	2.7	231.5	79.2
														60.5	17.8	1.9	238.2	81.8
														59	18.5	2	230.8	72.3
														52.8	19.1	1.7	229.2	75
														50.6	19.2	1.7	227.2	81
														64.1	19.8	1.6	230.4	77.6
														64.9	20.7	1.8	216	73
														56.8	21.3	1.7	203.2	56.4
														53.5	21.9	1.6	201	50.2
														47.2	22	1.3	199	42.2
														40.7	21.7	0.9	196.7	53.6
														40.8	21.4	0.8	214.4	45.8
														44.6	21.1	1.3	215.7	28.5
														29.2	20.4	1.4	234.4	19
														13.2	20	1.6	239.4	13.2
														4.2	20.2	1.4	246.1	9.4
														3.6	20.8	1.8	198.2	25.2
														10.9	20.6	2	214.1	29.5
														20	20.2	1.7	212.5	31.1
														20.8	19.7	2.1	220	33.5
														26.2	19.9	2.2	212	31.6
														24.5	19.9	2.1	216.6	25.7
														18.7	20	2.3	216.4	21
														15.2	20.7	2.5	205.1	22.4
														15	20.9	1.9	198.7	19.2
														14.9	21.6	2.7	203	20.7
														12	22.1	2.7	211.1	23.1
														16.5	22.4	2.9	202.2	25.4
														15.2	22.5	2.5	212.9	24.5
														16.1	22.7	2.7	212.8	25
														14.9	22.5	2.2	211.6	21.7
														15.8	22.4	2.6	201.9	19.4
														13.1	21.9	2.3	204.6	18.6
														13.6	21.6	1.9	210.1	11.5
														8.6	21	1.8	231.8	13.9
														7.1	20.5	1.3	231.6	13.1
														1.7	20.7	1.2	226.4	10.8
														7.7	20.4	0.9	239.8	12.9
														6.7	20	0.1	136.3	13
														6.8	19.5	0.3	232.7	16.2
														4.8	18.9	0.8	247.5	12.5
														1.5	19	0.3	23.4	12.4
														4.4	19	0	23	12.1
														2.5	18.8	0.5	252	12.2
														6.2	18.7	0.4	226.3	14.6
														5.8	18.7	0.3	258.9	16.7
														7.8	19.4	0.5	237.8	17.7
														2.6	21.2	0.8	227.3	12.4
														6.5	22.4	1	233.8	13.9
														9	22.6	1	235.7	21.4
														8.2	22.9	1.2	232.5	15.1
														6.4	23.3	1.2	136.6	23.1
														9.9	22.3	1.1	135.9	19.7
														5.6	21.9	1.1	143.2	18.6
														6.6	22.1	0.5	193.6	20.7
														11.7	21.8	0.8	239	12.6
														6.8	22	0.3	267.2	9.2
														11	22.4	0.7	300.9	13.9
														12.8	22.7	0.3	32.9	14.1
														9.5	22.4	0.1	153.6	13.6
														9.3	21.8	1.2	248.1	16.3
														5.6	21.3	0.9	228.8	14.3
														4.7	21.5	0.8	240.5	9.5
														3.8	21.5	0.2	281.4	9.5
														6.3	20.9	0.3	6.1	12
														6	20.4	0.1	297.2	13.3
														5	20	0.4	267.3	13.1
														1.9	19.8	0.9	240.8	14.1
														5.3	19.4	0.5	235.8	14
														9	19	0.4	256.7	23
														4.5	21	0.7	51.9	36.1
														8.5	23	0.8	69.8	28.4
														10.9	24.1	1	76.1	18.8
														10.6	25	1.4	85	9.9
														5.9	24.4	2.1	70.2	11.8
														1.8	24.6	2.6	67.8	16.6
														1	25	2.4	58.5	14.2
														3.8	24.5	2.3	39.5	16.1
														1.2	23	0.4	126.5	18.5
														0.7	23.4	0.2	223.7	28
														7	23.4	0.2	187.4	25.1
														9.9	24.4	0.7	75.4	34.9
														13.1	23.8	0.4	14.9	42.7
														13.3	22.5	0.3	308.1	30.1
														10.1	20.7	0.3	303.2	32.3
														20.9	19.5	0.6	263	27
														20	18.6	0.3	254.2	27.1
														16.4	18.7	0.3	189.5	24.9
														15.8	19.3	0.3	84.3	22.3
														13.1	18.2	0.2	214.5	23.9
														10.9	17.8	0.3	295	15.8
														8.8	17.6	0.3	257.5	14.5
														13.6	16.9	0	289.9	16.4
														11	19.2	1.4	283.3	17.5
														10.7	22.7	1.8	232.2	18.5
														13.8	23	3.8	265.4	10.7
														5.3	24.2	4.8	267.2	7.7
														1.5	26.4	3.3	258.7	6.4
														8.2	27.8	1.7	222.7	4.6
														6.3	27.1	2.1	119.8	14.3
														2.5	26.6	2.5	97.1	11
														3.7	27.1	2.2	89.5	9
														-1.1	26.6	2.7	97.9	11
														-0.5	26.2	2.9	106	11.6
														-1.2	25.4	1.8	95.2	14.7
														-2.5	24.9	1.6	86.2	16.7
														-1.3	24.2	1.5	76.2	16.9
														0.1	23.6	0.9	64	24.7
														1.7	23.3	0.7	80.9	15.9
														5.6	22.9	0.3	334.9	22.8
														2.7	21.5	0.3	267.5	14.9
														5.2	20.5	0.2	212	12.5
														1	20.1	0.2	246.4	10.8
														4.5	19.7	0.3	236.2	8.5
														-1.3	19.3	0.3	263.7	8.6
														3.1	19	0.3	247.4	9.7
														3.3	18.8	0.6	232	12.3
														2.8	19	0.6	245.5	16.4
														0.2	22.3	0.3	253.3	19.3
														1.9	24.8	1.7	354.5	25.7
														5	25.3	1.8	64.8	32.6
														7.7	25.7	2.4	62.1	30.2
														6.5	26	2.9	54.5	32
														6.2	26	3.5	52.5	35.5
														6.9	26.6	3.9	36.7	32.3
														2.2	26.3	3.9	44.4	33.3
														8.4	26.2	3.5	45.6	36.4
														8	26.7	3.9	45.4	44
														6.2	26.7	4.2	46.1	53.5
														10	26.2	3.3	36.1	52.2
														11.9	25.9	2.3	25.7	45.4
														17.9	25.6	0.6	36.5	40.5
														18.4	25.3	0.6	15.2	25.3
														23.1	26.2	0.9	9.7	32
														18.6	24.3	0.3	173.7	53.1
														14.5	22.5	0.3	237.4	39.3
														8	21.9	0.2	272.1	33
														8.9	22.4	0.5	6.8	17.8
														18.1	24.9	1.4	4.5	24.6
														18.4	25.7	2.2	6.5	33.4
														16.3	25.7	2.5	14.5	30.9
														12.6	26.8	3.6	324.5	31.8
														9.7	27.4	5.1	318.7	37.7
														17.4	28.7	5.8	318.7	54.2
														21.8	30.9	5.3	322.7	64.9
														19.6	33.1	5.2	327.8	64.7
														9.5	36.9	4	342.8	40.8
														28.4	39.8	5.4	329	46.6
														31.5	41	5.3	329.9	50.3
														16.5	41.1	4.5	322.5	81.1
														13.6	40.8	3.5	312.9	236.2
														20.5	40.8	2.5	309.1	446.1
															28.4	1.5	73.5	208.6
															28	0.7	68.9	127.8
														-3.2	27.8	0.8	41.6	135.3
														10.2	28.1	0.8	60.4	184.3
														19.3	26.2	0.9	50	128
														18.9	26.8	0.9	242.4	132.8
														24.8	29	1.2	241.9	218.3
														45.2	27.1	0.3	75.8	236.9
														37.6	26.2	0.9	280	129.6
														44.6	27.2	1.2	254.9	88.8
															25.8	0.3	298	122.2
														44	24.2	1.8	159.4	177.1
														85.8	24	0.5	259.5	172.7
														106.4	24.3	1.2	192.2	141.3
														82.8	23.4	2.4	170.4	129.8
														60.7	21.6	1.3	204.2	111.1
														48.2	20.3	1.2	235.6	111.9
														63.4	21	1	251.3	121.1
														49.5	23.1	0.5	254.2	80.2
														36.3	24.1	1.6	82.5	70.8
														38.7	24.6	1.6	91.7	55.6
														31.5	24.2	2.2	51.9	46.8
														26.2	24.2	2.1	65.3	56.3
														36.1	24.4	1.7	79.2	85.7
														45.5	24.2	1.5	63	91.3
														43.1	23.7	1.4	67.2	97
														29.7	23.4	0.8	72.3	92.3
														33.4	23.3	1	121.7	72.2
														31.8	23.7	0.3	90.4	79.8
														32.5	23.7	0.4	35.1	80.6
														22	22.8	1	37.9	65.9
														14.6	22.3	0.4	6.7	46.9
														11.7	22.4	0.4	27.1	53.8
														12.2	22.7	0.8	57.7	66.1
														17.4	22.6	0.5	38.5	76.4
														17.4	22.5	0.7	355.9	71.1
														31.6	22.4	0.5	4.2	62.4
														25.2	22.6	0.6	13.2	72.6
														20.2	22.9	0.6	12.7	73.4
														20.5	23.5	0.7	347.1	78.7
														19.8	24.6	1	53	95
														19.8	25.6	1.8	60.8	95.8
														16.1	26.2	2.4	61.1	87.5
														16.7	26.6	2.4	54	85.3
														16.8	26.6	2.6	50.1	79.8
														18.6	26.4	2.9	48.3	68.9
														14.9	25.9	3	52	63.5
														10.2	25.7	2.8	43.8	64.5
														12.9	25.2	2.7	45.8	61.9
														9	25.2	1.9	37.2	61.3
														8.6	25.2	1.7	35	57.3
														8.8	25.1	1.8	29.8	38.2
														9.9	25.1	1.1	11.4	25.4
														9.3	25.3	0.4	24.7	27.1
														7.1	24.8	0.6	50.1	24.6
														10.2	24.2	0.6	50.4	34.4
														9	24	0.2	70.8	42.4
														7.7	24	0.9	44.2	44.3
														4.4	24.2	0.5	10.3	31.5
														4.7	24.4	0.6	324.6	26.9
														4.1	24.6	0.3	241.5	15.6
														3.9	24.2	0.1	198.7	22.7
														5.7	25.6	0.6	71.8	40
														10.9	27.2	1.5	86.4	42.8
														12.5	27	2	55.3	39.1
														14.4	27.8	2.4	52.6	40.4
														15.3	27.5	2.9	53.3	37.6
														18.6	28.1	2.6	58.5	43.1
														20.8	28.1	2.3	49.1	36.5
														22.3	27.1	2	31	48.7
														22.9	27.8	2.3	36.4	34.9
														20.3	28.8	1.9	46.7	42.4
														21.7	27.6	2.2	65.8	41.5
														26.4	27.4	1.7	46.9	45.9
														27.3	27.2	2	25.1	32.8
														19.6	28.2	0.9	356.6	36.4
														14.3	28.5	1	22.9	33.1
														10.4	26.1	1.5	181.5	62.6
														24.5	24.9	3	201.3	73.5
														55.7	24.2	2.6	203.1	83.3
														57.1	23.8	2.6	200.7	54.3
														35.9	23.5	2.1	206.7	47.6
														29.2	23.3	1.5	213	57.9
														31	23.3	2	194.8	50.9
														25.7	23.5	1.7	197	33.1
														19.7	23.7	1.3	204.9	25.5
														16.5	23.8	1.3	221.7	24.1
														15.8	24.2	1.1	212.6	20.9
														13.9	24.6	1	177.4	28.6
														10.3	26.3	1.2	184.3	24
														14.4	26.4	2.9	130.2	27.7
														9.4	25.7	3.2	138	22.9
														7.7	25.6	2.7	119.7	33
														11.6	25.2	2.8	113.9	30.5
														15.2	25.2	2.1	110.7	32.1
														14.7	25.1	1.8	80.4	27.4
														11.2	25.1	1.9	61	29.1
														10.1	25.4	2.1	40.4	28.8
														8	24.7	1.6	54.1	33
														8	24.5	1	37.2	30
														9.4	24.3	0.1	220.8	31.1
														8.9	24.4	0.6	232.2	18.6
														9.8	24.8	0.4	235.7	19.7
														7.3	24.4	0.2	174.9	21.6
														4.7	24.4	0.5	110.1	20.1
														7.3	24	0.5	122.7	18.6
														5.2	23.6	0.3	190.6	23.3
														0.6	23.7	0.8	162.7	23
														1.9	23.9	1.1	168.5	36.2
														9.2	24	1	178.1	54.8
														18	24.2	0.9	199	59.8
														20.5	24.6	0.8	184.7	55.9
														24.3	24.8	1.3	137.2	50.1
														17.6	25.2	1.5	111.4	34.3
														17.6	25.8	1.8	98.8	43.6
														16.2	26.1	2	91.9	35.5
														10.9	25.8	2.4	77.6	34.7
														10.9	26.2	1.9	105.6	30.6
														10.9	26.9	1.9	110.6	31.6
														12.9	25.9	2.6	137.5	27.9
														12	25.6	3.8	168.8	30.2
														14	25.4	3.5	170.1	35.8
														18.6	25.2	2	193.7	33.5
														17	24.7	2.1	201.5	23.1
														10.9	24.3	2	200.6	22.5
														13.9	23.9	1.8	214.3	24.7
														13.6	23.6	1.6	224.4	24.6
														15	23.6	1.7	201.7	23.8
														18	23.6	1.5	200.7	23.3
														19.1	23.4	1.5	201.3	28.6
														27.5	23.1	1.7	211.5	39.9
														31.9	22.9	1.7	211	42.9
														31.2	22.6	1.6	214.2	52.4
														36.1	22.5	1.6	212.7	55.2
														34.5	22.9	1.3	207.8	45.1
														28.9	23.7	1.4	199.2	31.9
														16.9	24.5	2	155.5	32.4
														13.1	24.9	2.4	133.8	31.7
														12.4	24.9	2.9	139.9	30.3
														12.7	25.1	2.9	140.2	27.9
														3.5	25.6	2.8	131.6	6.1
														1	25.6	3.1	135.5	17.9
														-4.8	25.7	2.8	119.1	23.5
														-3.4	25.5	2.7	120.7	15.3
														-1	25	2.6	114.5	14.5
														6.1	24.6	2	107	12.4
														3.1	24.1	1.3	102.6	13.4
														-2.8	23.8	1.6	104.1	17.6
														1.2	23.4	1.2	80.2	13.9
														5.5	23.1	0.8	50.9	12
														3.7	22.5	0.5	296.6	18.4
														9.3	21.2	0.4	257.4	10.4
														6	20.2	0.4	246	8.7
														8.8	19.6	0.4	268	7.9
														7	18.9	0.3	271.7	5.7
														4.2	18.4	0.3	264.4	8
														12.6	18	0.3	264.2	8.6
														14.5	18.1	0.3	263.8	18.1
														1.3	21.4	0.5	359.6	31.9
														5.8	23.4	1.8	337.1	13.7
														10.5	24.7	1.9	66.5	24.2
														12	25.1	2.6	71.3	24.4
														9	25.6	2.8	60.9	25.3
														7	26	3.1	57.9	33.7
														7.1	26.2	3.3	55.3	29.9
														10.1	26.1	3.8	55.6	29.5
														8.2	26.6	3.4	49.3	31.3
														10.9	26.2	4.2	46	33.2
														9.7	25.9	3.7	38.1	33.4
														6.7	25.4	3.2	39.2	29
														7.5	24.8	3.1	42	30.2
														8.6	24.4	2	33.4	26.9
														9.3	24.1	1.4	17.9	21.1
														15	24.1	1.3	353.8	22
														17.5	24.4	1.3	5.2	24
														14.8	24.7	1.5	12.2	23.1
														14.8	24.4	1.3	28.8	21.1
														9.2	23.8	1.3	25.9	19.8
														14.7	23.6	1.1	29.7	18.4
														11.9	22.9	0.6	35.6	17.5
														7.4	22.4	0.5	315.4	22.4
														5.9	21.9	0.4	54	26.4
														4.9	24.1	1.4	46.4	30.5
														11.1	25.4	1.8	61.1	29.8
														9.9	26.1	2.2	58.5	23.5
														4.5	26.6	2.7	59.1	22.6
														6	27	2.9	60	23.6
														3.7	27.4	3.3	55.9	21.4
														1.9	27.7	3	52.2	20.9
														8.6	27.7	3.4	35	13
														11.2	27.8	3.3	36.6	26.2
														7.2	27.9	3.1	33.2	26.2
														4.3	27.7	2.7	33.6	27.4
														12.4	26.9	2.5	33.3	32.7
														16.3	26.1	2.5	35.5	34.9
														10.6	25.5	1.6	39.4	36.4
														6.2	25	1.1	53.9	42.2
														10.7	24.6	0.8	48.5	45
														10.5	24.2	1	51.2	55.9
														11.1	24	0.6	25.6	41.5
