# Supplementary material for: Black Carbon Emission, Transport and Effect on Radiation Forcing Modelling During the Summer 2019–2020 Wildfires in Southeast Australia
Source: Preprints.org preprint supplement (doi:10.20944/preprints202302.0293.v1), 2023-02-17
Supplement: Supplementary file 6 [file dec2019_573.xlsx]

## Sheet: dec2019_573
Date_time	Datetime (AEST)	dust_1	Predicted PM₁₀	Predicted PM₂ι₅	Predicted_BC	NO2	NO	Temp2m	U	V	Temp2m(C)	Wsp(pred)	Wdr(pred)	Observed PM₂ι₅	Temperature(obs)	Wsp(obs)	Wdr(obs)	Observed PM₁₀	BC_obs(nanograms/m3)	Date	Predicted PM₂ι₅	Observed PM₂ι₅	BC_pred	BC_obs_avg(nanograms/m3)	BC_obs(avg(micrograms/m3)		PM25_cor	PM25_IOA	PM25(P-O)^2	(P-O)+(O-O)^2	PM25_Obs_avg		PM25(P-O)^2	(P-O)+(O-O)^2	PM25_Obs_avg		Temp(P-O)^2	(P-O)+(O-O)^2	Temp_Obs_avg		Wsp(P-O)^2	(P-O)+(O-O)^2	Wsp_Obs_avg
2019-12-01_00:00:00	2019-12-01 10:00:00	0	0	0	0	0	0	295.05	-0.92	-0.81	21.9	1.22577	48.6383	5.4	19	1.3	12.3	31	166	2019-12-01	34.4479	24.1214	2.07286	467.714	0.467714		0.103421	0.337087	106.635	106.635	28.6802		29.16	3229.42	31.1143		8.41	23.04	22.8476		0.00551083	0.918214	1.74228
2019-12-01_01:00:00	2019-12-01 11:00:00	0	0.04	0.04	0	0	0	295.56	-2.95	-2.75	22.41	4.03299	47.0097	2.8	20.2	1.8	50.3	36.3	169	2019-12-02	11.8013	4.0875	0.440417	224.25	0.22425		0.656575	0.787341	59.5019	1719.86			7.6176	3526.93			4.8841	9.5481			4.98624	5.51775
2019-12-01_02:00:00	2019-12-01 12:00:00	0	1.81	1.65	0.1	0	0	296.92	-2.77	-3.51	23.77	4.47135	38.2797	9	22.2	2.8	41.1	61.3	183	2019-12-03	24.9429	4.06667	0.949167	49	0.049				435.818	803.746			54.0225	2660.29			2.4649	2.4649			2.79342	14.344
2019-12-01_03:00:00	2019-12-01 13:00:00	0	32.29	29.38	1.77	0	0	301.08	1.42	-3.36	27.93	3.64774	337.09	25.6	23.4	3	64.6	88.1	184	2019-12-04	17.6808	9.04583	0.664583	118	0.118		Temp_cor	Temp_IOA	74.5632	938.401			14.2884	52.5335			20.5209	31.6969			0.419566	10.0092
2019-12-01_04:00:00	2019-12-01 14:00:00	0	58.6	53.32	3.22	0.01	0	301.83	4.58	-3.55	28.68	5.79473	307.78	47.8	25	2.7	37.7	83	196	2019-12-05	29.9213	30.7625	1.58542	2200.33	2.20033		0.826941	0.784147	0.707702	11.0473			30.4704	1512.59			13.5424	63.6804			9.57736	25.1074
2019-12-01_05:00:00	2019-12-01 15:00:00	0	65.85	59.9	3.63	0.01	0	301.95	4.6	-2.22	28.8	5.10768	295.762	52.5	25.7	2.8	69.1	86.8	151	2019-12-06	13.9467	19.3208	0.75	781.167	0.781167				28.8817	580.449			54.76	2517.23			9.61	77.44			5.32539	19.5689
2019-12-01_06:00:00	2019-12-01 16:00:00	0	44.83	40.76	2.47	0.01	0	301.36	4.64	-1.95	28.21	5.0331	292.795	41.9	25.3	3.3	70.1	58.2	142	2019-12-07	65.5837	86.3708	3.465	2802.38	2.80238		Wsp_cor	Wsp_IOA	432.103	8948.14			1.2996	417.467			8.4681	60.9961			3.00364	23.5138
2019-12-01_07:00:00	2019-12-01 17:00:00	0	44.1	40.11	2.43	0.01	0	300.48	5.09	-2.07	27.33	5.49482	292.131	26.6	23.4	3	69.1	48.5	142	2019-12-08	61.0279	24.8167	3.2375	1672.12	1.67213		0.657604	0.71868	1311.25	1311.25			182.52	182.52			15.4449	25.3009			6.22411	25.1083
2019-12-01_08:00:00	2019-12-01 18:00:00	0	81.99	74.58	4.51	0.01	0	298.39	2.67	-1.38	25.24	3.00554	297.332	13.5	22.8	1.8	67.3	43.3	149	2019-12-09	73.1804	64.8	3.98167	1967.54	1.96754				70.2314	6499.65			3730.77	3730.77			5.9536	5.9536			1.45334	1.74648
2019-12-01_09:00:00	2019-12-01 19:00:00	0	171.71	156.26	9.37	0.02	0.01	295.41	2.57	-1.23	22.26	2.84918	295.576	10.2	21.9	1.9	65.2	40.4	185	2019-12-10	36.22	98.9625	1.32583	0	0		BC_cor		3936.62	6056.34			21333.5	21333.5			0.1296	2.3716			0.900934	1.60067
2019-12-01_10:00:00	2019-12-01 20:00:00	0	6.91	6.29	0.37	0	0	291.53	4.64	2.83	18.38	5.43493	238.62	16.9	22.3	2.4	248.1	-1.6	349	2019-12-11	14.4796	24.5458	0.187083	263.792	0.263792		0.611912		101.329	336.157			112.572	1523.97			15.3664	25.2004			9.21082	18.9306
2019-12-01_11:00:00	2019-12-01 21:00:00	0	3.07	2.79	0.16	0	0	290.02	2.4	0.69	16.87	2.49722	253.96	35.8	22.1	5.9	246.6	88.9	1120	2019-12-12	13.06	18.0375	0.0666667	748.292	0.748292				24.7755	689.719			1089.66	1089.66			27.3529	45.2929			11.5789	24.1397
2019-12-01_12:00:00	2019-12-01 22:00:00	0	9.7	8.83	0.51	0	0	288.19	0.49	-1.23	15.04	1.32401	338.279	29.3	19.7	3.2	248	51.2	1771	2019-12-13	9.10292	9.0375	0.0141667	619.125	0.619125				0.00427934	1538.18			419.021	580.714			21.7156	120.122			3.51934	3.51934
2019-12-01_13:00:00	2019-12-01 23:00:00	0	9.17	8.36	0.48	0	0	287.35	0.84	-2.07	14.2	2.23394	337.913	20.4	18.6	0.4	30.1	31	1641	2019-12-14	13.6908	39.3667	0.37125	1511.17	1.51117				659.248	659.248			144.962	1120.11			19.36	166.41			3.36335	3.36335
2019-12-01_14:00:00	2019-12-02 00:00:00	0	8.25	7.52	0.44	0	0	287.79	1.07	-2.88	14.64	3.07234	339.619	13.3	17.1	0.4	39.3	33	1642	2019-12-15	26.1183	30.5083	1.26708	1541.75	1.54175				19.2721	19.2721			33.4084	1714.62			6.0516	194.882			7.14142	7.14142
2019-12-01_15:00:00	2019-12-02 01:00:00	0	9.63	8.77	0.51	0	0	288.91	0.38	-3.07	15.76	3.09343	352.944	10	17.9	2.5	250.1	29.1	811	2019-12-16	8.88458	23.0625	0.277083	1081.5	1.0815				201.013	645.816			1.5129	1888.6			4.5796	144.962			0.352157	4.44969
2019-12-01_16:00:00	2019-12-02 02:00:00	0	9.43	8.57	0.5	0	0	286.96	0.12	-2.97	13.81	2.97242	357.686	5.1	18.2	3.6	286.9	18.7	590	2019-12-17	10.5	8.05417	0.167083	366.458	0.366458				5.9821	1505.89			12.0409	2357.88			19.2721	187.416			0.393853	9.53836
2019-12-01_17:00:00	2019-12-02 03:00:00	0.1	8.24	6.84	0.39	0	0	287.23	-0.44	-2.17	14.08	2.21416	11.4623	5.5	16.5	2.8	287.3	7.8	617	2019-12-18	17.8388	30.8375	0.724167	918.958	0.918958				168.968	168.968			1.7956	2488.81			5.8564	228.614			0.34321	2.34139
2019-12-01_18:00:00	2019-12-02 04:00:00	0.35	10.75	7.53	0.4	0	0	285.35	-0.38	-2.66	12.2	2.68701	8.13019	3.5	16.1	2.4	292.2	5	668	2019-12-19	48.0496	46.8458	2.41292	2411.83	2.41183				1.44901	1408.91			16.2409	2621.24			15.21	302.76			0.0823723	2.56963
2019-12-01_19:00:00	2019-12-02 05:00:00	0.57	12.7	7.87	0.4	0	0	285.51	0.49	-3.1	12.36	3.13849	351.018	5.3	16	2.4	294.1	3.6	235	2019-12-20	32.2746	7.46667	1.29917	1090.17	1.09017				615.433	615.433			6.6049	2406.69			13.2496	300.676			0.545363	4.22092
2019-12-01_20:00:00	2019-12-02 06:00:00	0.83	16.17	9.25	0.45	0	0	288.73	-0.16	-2.91	15.58	2.9144	3.14719	4.9	16.6	1.4	283.2	4.7	94	2019-12-21	54.6892	49.6542	2.13708	955.167	0.955167				25.3512	2207.43			18.9225	2311.49			1.0404	182.79			2.29339	2.29339
2019-12-01_21:00:00	2019-12-02 07:00:00	0.76	12.37	6.39	0.29	0	0	290.19	3.25	-2.01	17.04	3.82133	301.735	1.7	17.1	2.4	258.2	2	85	2019-12-22	34.3	15.3625	1.35875	1089.42	1.08942				358.629	358.629			21.9961	2930.92			0.0036	133.634			2.02019	7.493
2019-12-01_22:00:00	2019-12-02 08:00:00	1.06	10.78	3.14	0.07	0	0	291.86	4.35	-0.77	18.71	4.41762	280.038	-1.1	16.9	2.5	292.5	4.3	82	2019-12-23	9.77708	14.0708	0.09875	470.75	0.47075				18.4363	1123.06			17.9776	3622.6			3.2761	101.808			3.67728	11.7898
2019-12-01_23:00:00	2019-12-02 09:00:00	0.49	6.16	2.17	0.05	0	0	292.95	6.04	-1.22	19.8	6.16198	281.419	-0.7	18.2	4.5	280.2	3.8	81	2019-12-24	8.78	10.1667	0.0370833	479.958	0.479958				1.92284	1475.58			8.2369	3691.53			2.56	59.29			2.76218	51.5234
2019-12-02_00:00:00	2019-12-02 10:00:00	0.29	4.08	1.45	0.02	0	0	293.6	6.57	0.12	20.45	6.5711	268.954		19.6	5.6	275.1	17.9	64	2019-12-25	10.0642	13.1083	0.00208333	625.292	0.625292				9.26695	1168.79			2.1025	3693.97			0.7225	31.9225			0.943027	75.4656
2019-12-02_01:00:00	2019-12-02 11:00:00	0.1	5.35	2.8	0.09	0	0	294.42	7.46	0.01	21.27	7.46001	269.923	-1.3	19.9	5.3	274.4	15.9	37	2019-12-26	5.23792	10.7125	0.0329167	547.083	0.547083				29.9711	1714.75			16.81	3687.89			1.8769	20.5209			4.66563	86.0443
2019-12-02_02:00:00	2019-12-02 12:00:00	0.01	8.31	4.7	0.16	0	0	294.87	7.75	-0.17	21.72	7.75186	271.257	0.1	20.2	6.1	269.8	14.9	36	2019-12-27	6.16333	8.79583	0.132917	544.292	0.544292				6.93006	1797.83			21.16	3297.98			2.3104	14.2884			2.72866	107.493
2019-12-02_03:00:00	2019-12-02 13:00:00	0.01	17.37	7.03	0.09	0	0	294.7	8.48	0.78	21.55	8.5158	264.745		21.1	7.7	257.5	36.8	28	2019-12-28	18.5121	16.65	0.72375	477.167	0.477167				3.46735	492.748			49.4209	3046.82			0.2025	9.3025			0.665525	162.099
2019-12-02_04:00:00	2019-12-02 14:00:00	0.01	17.46	6.62	0.05	0	0	294.82	8.86	1.34	21.67	8.96076	261.4	-0.3	21.3	7.8	269.2	42.9	26	2019-12-29	49.9354	44.2708	2.33083	1834.38	1.83438				32.0875	1357.65			47.8864	3125.7			0.1369	7.4529			1.34736	176.272
2019-12-02_05:00:00	2019-12-02 15:00:00	0	18.46	6.82	0.02	0	0	294.56	8.59	1.83	21.41	8.78277	257.974	1.6	20.8	7	273.9	25.5	50	2019-12-30	34.7271	61.2667	1.47917	2507.96	2.50796				704.349	1492.57			27.2484	2895.3			0.3721	12.1801			3.17826	151.26
2019-12-02_06:00:00	2019-12-02 16:00:00	0	26.34	9.3	0.03	0	0	294.16	8.45	1.86	21.01	8.65229	257.586	3.4	20.5	7.3	261.2	27.2	27	2019-12-31	26.1858	52.4375	1.2175	2895.25	2.89525				689.15	689.15			34.81	2453.02			0.2601	17.5561			1.82868	155.458
2019-12-02_07:00:00	2019-12-02 17:00:00	0	31.24	11.16	0.06	0	0	293.62	8	2.34	20.47	8.3352	253.696	6.7	20.1	5.8	241.7	25.5	35	2020-01-01	31.7682	17.1545	0.804545	1752	1.752				213.558	213.558			19.8916	1968.52			0.1369	26.3169			6.42725	113.448
2019-12-02_08:00:00	2019-12-02 18:00:00	0	26.88	10.19	0.09	0	0	292.61	6.96	2.04	19.46	7.25281	253.664	7.9	19.2	6.4	263.8	50.2	25										10346.9	48654.9			5.2441	1948.16			0.0676	49.5616			0.727279	103.405
2019-12-02_09:00:00	2019-12-02 19:00:00	0	36.25	18.85	0.61	0	0	288.28	2.79	-0.14	15.13	2.79351	272.873	6.3	18	4.7	262.9	39.8	40														157.503	1374.78			8.2369	158.005			3.6347	16.0762
2019-12-02_10:00:00	2019-12-02 20:00:00	0	58.6	40.48	1.91	0	0	287.61	2.21	-2.19	14.46	3.1113	314.74	8	17.3	3.7	268	24.7	36														1054.95	1054.95			8.0656	194.324			0.346565	11.0709
2019-12-02_11:00:00	2019-12-02 21:00:00	0	69.69	50.37	2.45	0.01	0	286.85	2.16	-2.52	13.7	3.31904	319.399	7.6	16.6	2.6	261.9	21.3	27														1829.27	1829.27			8.41	237.16			0.517013	5.9294
2019-12-02_12:00:00	2019-12-02 22:00:00	0	43.78	24.79	0.9	0	0	285.66	2.06	-2.49	12.51	3.23167	320.399	5.6	16.3	2.6	266.6	18.6															368.256	1013.66			14.3641	285.272			0.399009	5.51156
2019-12-02_13:00:00	2019-12-02 23:00:00	0	41.89	20.62	0.59	0	0	284.46	1.9	-2.26	11.31	2.95256	319.946	5	16	2.7	270.7	15.6	46														243.984	1340.15			21.9961	338.192			0.0637857	4.70264
2019-12-02_14:00:00	2019-12-03 00:00:00	0	43.44	18.62	0.37	0	0	283.45	1.71	-2.22	10.3	2.80223	322.394	3	15.5	1.8	264.1	13.3	45														243.984	1649.01			27.04	396.01			1.00447	1.25044
2019-12-02_15:00:00	2019-12-03 01:00:00	0	44	18.01	0.3	0	0	283.21	1.12	-1.9	10.06	2.20554	329.482	2.8	14.7	1.4	294.5	15.3	45														231.344	1715.45			21.5296	438.484			0.648892	0.648892
2019-12-02_16:00:00	2019-12-03 02:00:00	0	44.86	18.02	0.27	0	0	282.93	0.42	-2.23	9.78	2.26921	349.334	2.7	15.5	2.1	275.8	13.5	44														234.702	1722.91			32.7184	416.976			0.028631	0.783591
2019-12-02_17:00:00	2019-12-03 03:00:00	0	44.54	17.24	0.21	0	0	282.77	-0.56	-2.03	9.62	2.10583	15.4223	4.7	15.9	2.2	270.3	13.5	58														157.252	1623.12			39.4384	407.232			0.00886888	0.675397
2019-12-02_18:00:00	2019-12-03 04:00:00	0	44.12	16.96	0.19	0	0	282.39	-0.73	-2.24	9.24	2.35595	18.0505	3	15.5	1.7	277.7	15.4	53														194.882	1786.58			39.1876	439.322			0.43027	0.43027
2019-12-02_19:00:00	2019-12-03 05:00:00	0	45.93	18.98	0.3	0	0	282.39	-0.39	-3.29	9.24	3.31303	6.76043	4.7	14.6	1	330.1	16	43														203.918	1485.95			28.7296	477.86			5.35013	5.35013
2019-12-02_20:00:00	2019-12-03 06:00:00	0	52.07	25.01	0.65	0	0	286.05	-0.43	-1.91	12.9	1.9578	12.6876	5.5	15.8	1.7	269.7	13.4	61														380.64	1006.03			8.41	289			0.0664634	0.0664634
2019-12-02_21:00:00	2019-12-03 07:00:00	0	45.68	20.34	0.41	0	0	289.78	-0.38	-2.24	16.63	2.272	9.62824	2.7	18.1	3.5	257.7	12.6	34														311.17	1535.7			2.1609	120.341			1.50798	5.23496
2019-12-02_22:00:00	2019-12-03 08:00:00	0	40.6	17.57	0.31	0	0	291.52	1.43	-2.05	18.37	2.49948	325.102		19.7	3.9	259.2	10	30														308.705	1994.34			1.7689	58.2169			1.96146	8.50002
2019-12-02_23:00:00	2019-12-03 09:00:00	0	29.49	11.61	0.09	0	0	294.25	2.72	-0.75	21.1	2.82151	285.415		21.1	3.2	278.8	9	32														134.792	2562.18			4.54384e-28	12.25			0.143257	6.43894
2019-12-03_00:00:00	2019-12-03 10:00:00	0	21.86	8.26	0.01	0	0	296.82	4.57	-0.03	23.67	4.5701	270.376		23.4	2.7	277.1	9.4	29														68.2276	2912.55			0.0729	1.8769			3.49727	14.3345
2019-12-03_01:00:00	2019-12-03 11:00:00	0	18.76	7.5	0.04	0	0	298.5	5.03	0.2	25.35	5.03397	267.723	-1.9	25.2	3.1	288.8	8	29														88.36	3206.73			0.0225	23.5225			3.74026	21.6223
2019-12-03_02:00:00	2019-12-03 12:00:00	0	17.11	7.2	0.08	0	0	299.79	5.52	0.62	26.64	5.55471	263.591	-0.1	27.1	3.6	271.2	7.7	35														53.29	3039.1			0.2116	64.6416			3.82089	32.1569
2019-12-03_03:00:00	2019-12-03 13:00:00	0	15.91	6.45	0.06	0	0	300.66	5.57	0.99	27.51	5.6573	259.922	9.8	28.3	3.6	286.1	12.9	39														11.2225	2113.98			0.6241	102.212			4.23247	33.3309
2019-12-03_04:00:00	2019-12-03 14:00:00	0	15.22	6.85	0.13	0	0	301.34	5.56	1.12	28.19	5.67168	258.611	5.3	29.3	4.1	287	10.3	109														2.4025	2507.81			1.2321	139.004			2.47019	39.535
2019-12-03_05:00:00	2019-12-03 15:00:00	0	12.69	5.31	0.07	0	0	301.5	5.74	1.16	28.35	5.85604	258.575	6.3	29.3	5.1	275.9	12.7	173														0.9801	2562.18			0.9025	142.803			0.571596	55.8314
2019-12-03_06:00:00	2019-12-03 16:00:00	0	13.25	5.58	0.07	0	0	301.15	5.72	1.24	28	5.85286	257.768	5.3	29.1	5.4	274	13.3	51														0.0784	2636.62			1.21	129.96			0.205084	60.3552
2019-12-03_07:00:00	2019-12-03 17:00:00	0	11.66	5.39	0.07	0	0	300.38	5.52	1.19	27.23	5.64681	257.834	1.7	28.3	4.8	274	16.6	35														13.6161	3040.2			1.1449	96.6289			0.717093	48.4808
2019-12-03_08:00:00	2019-12-03 18:00:00	0	20.54	13	0.47	0	0	298.95	3.92	0.91	25.8	4.02424	256.931	5.4	27.2	4.2	255.1	22	36														57.76	1920.89			1.96	53.29			0.0308919	22.4699
2019-12-03_09:00:00	2019-12-03 19:00:00	0	56.53	44.72	2.3	0	0	294.2	1.33	-0.19	21.05	1.3435	278.13	5.5	25.5	2.5	264	22.2	37														1538.21	1538.21			19.8025	19.8025			1.33749	1.33749
2019-12-03_10:00:00	2019-12-03 20:00:00	0	139.51	120.48	6.76	0.01	0.01	292.43	0.95	-2.06	19.28	2.2685	335.243	9.1	23.5	2.4	263.6	24.4	36														12405.5	12405.5			17.8084	17.8084			0.0172918	1.40304
2019-12-03_11:00:00	2019-12-03 21:00:00	0	153.59	133.57	7.44	0.02	0.01	292.04	1.56	-3.09	18.89	3.46146	333.213	5.7	23.1	3.6	259.4	24.2	35														16350.7	16350.7			17.7241	17.7241			0.0191935	12.7982
2019-12-03_12:00:00	2019-12-03 22:00:00	0	41.65	30.47	1.38	0	0	290.15	1.31	-2.8	17	3.09129	334.927	10.2	22.6	4.3	253.6	19.1	45														410.873	464.747			31.36	37.21			1.46097	15.2669
2019-12-03_13:00:00	2019-12-03 23:00:00	0	33.18	21.49	0.8	0	0	290.07	0.93	-3.33	16.92	3.45743	344.396	6.2	21.9	4.1	249.8	20	42														233.784	1192.87			24.8004	47.3344			0.4129	16.5928
2019-12-03_14:00:00	2019-12-04 00:00:00	0	41.03	28.06	1.15	0	0	290.11	1.02	-3.54	16.96	3.68402	343.926	7.1	20.9	2.8	260.2	19	50														439.322	732.677			15.5236	61.4656			0.781491	9.00012
2019-12-03_15:00:00	2019-12-04 01:00:00	0	41.65	27.88	1.1	0	0	289.69	1.29	-3.22	16.54	3.46879	338.168	5.6	18	0.4	285.4	21.9	47														496.398	826.448			2.1316	124.546			9.41747	9.41747
2019-12-03_16:00:00	2019-12-04 02:00:00	0	40.49	26.26	0.98	0	0	289.19	1.37	-3.38	16.04	3.64709	337.936	7.8	15.3	0.7	9.3	20.7	46														340.772	793.436			0.5476	206.21			8.68537	8.68537
2019-12-03_17:00:00	2019-12-04 03:00:00	0	37.46	23.13	0.78	0	0	287.19	1.53	-2.71	14.04	3.11207	330.552	9.8	14.7	0.6	351.4	17.3	54														177.689	858.373			0.4356	287.642			6.31051	6.31051
2019-12-03_18:00:00	2019-12-04 04:00:00	0	32.71	18.3	0.48	0	0	286.93	1.55	-1.44	13.78	2.11568	312.893	5.3	14.5	1.2	313.5	18.8	52														169	1492.12			0.5184	303.456			0.838469	0.838469
2019-12-03_19:00:00	2019-12-04 05:00:00	0	33.47	18.71	0.49	0	0	286.81	1.14	-0.49	13.66	1.24085	293.259	3.5	14.2	0.8	299.6	19.9	65														231.344	1601.44			0.2916	318.266			0.194346	2.08269
2019-12-03_20:00:00	2019-12-04 06:00:00	0	39.02	23.64	0.76	0	0	290.53	0.71	-0.36	17.38	0.796053	296.887	0.9	15.2	0.5	337.2	25.3	61														517.108	1420.39			4.7524	172.134			0.0876472	4.78711
2019-12-03_21:00:00	2019-12-04 07:00:00	0	40.67	24.62	0.79	0	0	291.98	-0.3	1.18	18.83	1.21754	165.735		21.5	1.5	325.6	15.5	44														606.144	1414.36			7.1289	28.8369			0.0797845	0.587463
2019-12-03_22:00:00	2019-12-04 08:00:00	0	35.31	20.57	0.58	0	0	293.11	0.72	0.15	19.96	0.735459	258.232		23.8	1.9	303.9	11	48														423.125	1735.39			14.7456	14.7456			1.35616	1.35616
2019-12-03_23:00:00	2019-12-04 09:00:00	0	26.81	14.72	0.33	0	0	295.23	0.94	-0.41	22.08	1.02552	293.565		25.8	2.6	285.4	7.3	56														216.678	2257.01			13.8384	13.8384			2.47897	2.47897
2019-12-04_00:00:00	2019-12-04 10:00:00	0	16.73	8.89	0.16	0	0	297.42	1.2	1.38	24.27	1.82877	221.009	-2.4	27.6	3.8	257.9	5.6	112														127.464	3106.72			11.0889	38.0689			3.88575	4.60004
2019-12-04_01:00:00	2019-12-04 11:00:00	0	10.56	5.53	0.08	0	0	299.02	1.36	2.4	25.87	2.75855	209.539	0.3	29.3	3.3	265.5	5.2	468														27.3529	3180.73			11.7649	89.6809			0.293168	6.62831
2019-12-04_02:00:00	2019-12-04 12:00:00	0	4.82	2.46	0.02	0	0	300.79	2.52	2.25	27.64	3.3783	228.24	-0.8	30.8	4.1	268.3	10.7	126														10.6276	3668.48			9.9856	162.308			0.520853	15.9544
2019-12-04_03:00:00	2019-12-04 13:00:00	0	3.48	1.82	0.02	0	0	302.09	4.73	2.03	28.94	5.14721	246.772		31.7	4.1	268.9	13	137														3.3124	3649.13			7.6176	223.204			1.09665	33.2146
2019-12-04_04:00:00	2019-12-04 14:00:00	0	4.15	2.18	0.02	0	0	302.44	5.2	1.9	29.29	5.53624	249.928		32.3	4.4	281.8	17.8	189														4.7524	3605.76			9.0601	252.492			1.29105	41.6315
2019-12-04_05:00:00	2019-12-04 15:00:00	0	5.23	2.68	0.03	0	0	302.51	5.16	1.96	29.36	5.51971	249.201	-2.5	32.2	4.7	267.7	11.5	604														26.8324	3849.95			8.0656	251.54			0.671925	45.3698
2019-12-04_06:00:00	2019-12-04 16:00:00	0	6.95	3.5	0.03	0	0	302.18	5.01	1.9	29.03	5.35818	249.231	3	32.1	4.7	276.2	19	241														0.25	3105.61			9.4249	238.085			0.433202	43.2199
2019-12-04_07:00:00	2019-12-04 17:00:00	0	8.74	4.18	0.03	0	0	301.49	4.78	1.81	28.34	5.11121	249.26	6.7	31.2	5	273.8	28.8	61														6.3504	2636.62			8.1796	191.546			0.0123684	43.92
2019-12-04_08:00:00	2019-12-04 18:00:00	0	13.49	7.88	0.23	0	0	300.14	3.49	1.46	26.99	3.78308	247.299	8.1	29.8	4.4	271.1	26.6	32														0.0484	2138.88			7.8961	122.988			0.380589	22.0814
2019-12-04_09:00:00	2019-12-04 19:00:00	0	9.64	4.62	0.03	0	0	294.6	2.54	1.29	21.45	2.84881	243.075	35.1	26.4	1.2	162.7	182.2	58														929.03	929.03			24.5025	24.5025			2.71856	2.71856
2019-12-04_10:00:00	2019-12-04 20:00:00	0	22.06	16.01	0.69	0	0	293.04	2.42	0.57	19.89	2.48622	256.746		22.6	1.1	149.5	178.7	97														256.32	2136.1			7.3441	10.3041			1.92161	1.92161
2019-12-04_11:00:00	2019-12-04 21:00:00	0	93.31	80.87	4.44	0.01	0	292.31	3.14	-1.12	19.16	3.33377	289.631		20.2	1.2	188.7	148.3	55														6539.96	6539.96			1.0816	40.1956			4.55296	4.55296
2019-12-04_12:00:00	2019-12-04 22:00:00	0	47.86	38.75	1.94	0	0	290.14	2.99	-1.26	16.99	3.24464	292.851	81	18.4	1.8	221.1	117	67														1785.06	3308.78			1.9881	106.296			2.08699	2.4356
2019-12-04_13:00:00	2019-12-04 23:00:00	0	27.12	19.08	0.79	0	0	289.13	2.82	-1.39	15.98	3.14396	296.239	48.6	17.9	1.8	193.7	77.1	62														871.43	871.43			3.6864	139.712			1.80624	2.13149
2019-12-04_14:00:00	2019-12-05 00:00:00	0	25.14	16.36	0.6	0	0	287.9	2.57	-1.61	14.75	3.03266	302.065	41	16.1	0.5	235.3	53	58														607.13	607.13			1.8225	220.523			6.41434	6.41434
2019-12-04_15:00:00	2019-12-05 01:00:00	0	26.15	16.75	0.59	0	0	287.56	2	-2.17	14.41	2.95108	317.335	31.6	13.8	0.3	334.2	38.5	70														220.523	220.523			0.3721	305.9			7.02825	7.02825
2019-12-04_16:00:00	2019-12-05 02:00:00	0	25.4	16.29	0.56	0	0	287.29	1.31	-2.82	14.14	3.10942	335.083	33.6	12.7	0.2	294.9	48.8	82														299.636	299.636			2.0736	355.7			8.46473	8.46473
2019-12-04_17:00:00	2019-12-05 03:00:00	0	23.34	15.1	0.52	0	0	287.17	0.84	-3.21	14.02	3.31809	345.336	40	11.4	0	349.2	47.4	76														620.01	620.01			6.8644	411.278			11.0097	11.0097
2019-12-04_18:00:00	2019-12-05 04:00:00	0	22.47	14.52	0.5	0	0	287.26	0.72	-3.37	14.11	3.44606	347.94	47.6	10.6	0.2	244.7	46.2	5129														1094.29	1094.29			12.3201	440.58			10.5369	10.5369
2019-12-04_19:00:00	2019-12-05 05:00:00	0	22.66	14.57	0.51	0	0	287.44	0.74	-3.5	14.29	3.57737	348.062	55.4	10	0.2	51.8	46.2	4497														1667.09	1667.09			18.4041	458.388			11.4067	11.4067
2019-12-04_20:00:00	2019-12-05 06:00:00	0	23.51	15.18	0.54	0	0	290.08	-0.21	-2.15	16.93	2.16023	5.57872	52.3	10.2	0.1	237.7	64.7	4096														1377.89	1377.89			45.2929	344.845			4.24455	4.24455
2019-12-04_21:00:00	2019-12-05 07:00:00	0	28.23	19.61	0.8	0	0	295.05	-0.66	-2.25	21.9	2.3448	16.3483		16.1	0.6	54.2	54.6	3202														384.552	1816.29			33.64	59.29			3.04434	3.04434
2019-12-04_22:00:00	2019-12-05 08:00:00	0	19.97	12.6	0.41	0	0	297.54	-0.17	-1.84	24.39	1.84784	5.27873	55.7	22	1.9	59.6	157.7	1895														1857.61	1857.61			5.7121	5.7121			0.00272102	0.0696097
2019-12-04_23:00:00	2019-12-05 09:00:00	0	18.98	12.33	0.42	0	0	299.59	0.32	-2.2	26.44	2.22315	351.724	128.3	26.6	1.1	27.5	158.6	1558														13449	13449			0.0256	53.8756			1.26147	1.26147
2019-12-05_00:00:00	2019-12-05 10:00:00	0	14.39	9.26	0.31	0	0	301.74	0.62	-1.56	28.59	1.67869	338.325	96.2	30.7	2.6	282.5	9.7	1544														7558.56	7558.56			4.4521	184.688			0.848812	0.848812
2019-12-05_01:00:00	2019-12-05 11:00:00	0	6.75	4.15	0.13	0	0	303.85	2.09	0.56	30.7	2.16372	255	26	32.4	4.8	275.3	0.8	1790														477.423	1029			2.89	302.76			6.94995	12.1085
2019-12-05_02:00:00	2019-12-05 12:00:00	0	6.81	5.3	0.27	0	0	305.45	4.49	1.21	32.3	4.65018	254.918	3.6	33	4.9	274.6	5.1	1869														2.89	2843.88			0.49	384.16			0.0624086	36.7986
2019-12-05_03:00:00	2019-12-05 13:00:00	0	15.6	13.64	0.8	0	0	306.04	5.87	1.12	32.89	5.97589	259.198	-1	34.1	6.4	269.4		1853														214.33	2458.97			1.4641	453.264			0.179867	79.0658
2019-12-05_04:00:00	2019-12-05 14:00:00	0.01	20.57	17.68	1.02	0	0	306.16	6.73	1.36	33.01	6.86604	258.575		34.6	6.1	265		1999														312.582	1984.52			2.5281	480.048			0.586817	89.9091
2019-12-05_05:00:00	2019-12-05 15:00:00	0.02	18.93	15.98	0.9	0	0	305.94	6.42	1.57	32.79	6.60918	256.258	-2.5	34.8	5.8	259.7	28	2578														341.51	2376.37			4.0401	479.172			0.654777	79.6589
2019-12-05_06:00:00	2019-12-05 16:00:00	0.04	16.22	13.55	0.75	0	0	305.71	5.99	1.52	32.56	6.17985	255.761	4.4	34.8	6.1	284.1	41.9	3053														83.7225	1960.54			5.0176	469.156			0.00637543	77.3669
2019-12-05_07:00:00	2019-12-05 17:00:00	0.08	18.53	15.58	0.88	0	0	305.16	5.79	1.59	32.01	6.00435	254.644	6.5	34.5	5.6	280.2	89.7	8536														82.4464	1611.86			6.2001	433.056			0.163498	65.9401
2019-12-05_08:00:00	2019-12-05 18:00:00	0.09	49.31	43.45	2.58	0.01	0	303.6	3.65	1.43	30.45	3.92013	248.606	6.4	33.5	5.1	281.7	144.6	8219														1372.7	1372.7			9.3025	333.063			1.3921	30.6487
2019-12-05_09:00:00	2019-12-05 19:00:00	0.1	110.36	98.9	5.9	0.01	0.01	297.63	2.69	0.79	24.48	2.8036	253.634	14.2	32	3.4	285.2	205.5	527														7174.09	7174.09			56.5504	116.208			0.355687	7.39625
2019-12-05_10:00:00	2019-12-05 20:00:00	0.11	235.71	212.97	12.63	0.03	0.01	295.73	3.1	-0.82	22.58	3.20662	284.816	21.7	30	1.4	280.9	187.6	34														36584.2	36584.2			55.0564	55.0564			3.26387	3.26387
2019-12-05_11:00:00	2019-12-05 21:00:00	0.12	93.83	83.57	4.84	0.01	0	294.68	3.22	-0.58	21.53	3.27182	280.211	25.7	28.9	1.4	280.9	183.1	44														3348.94	3348.94			54.3169	54.3169			3.50371	3.50371
2019-12-05_12:00:00	2019-12-05 22:00:00	0.12	20.39	16.6	0.87	0	0	293.71	3.27	-0.31	20.56	3.28466	275.416	28.2	25.6	0.6	285.6	167.2	47														134.56	303.735			25.4016	25.4016			7.20741	7.20741
2019-12-05_13:00:00	2019-12-05 23:00:00	0.11	17.6	14.17	0.72	0	0	292.67	3.22	-0.04	19.52	3.22025	270.712	23.4	26.2	2.7	244.9	115.9	52														85.1929	608.017			44.6224	44.6224			0.270658	5.93531
2019-12-05_14:00:00	2019-12-06 00:00:00	0.09	16.25	13.39	0.7	0	0	291.66	3.1	-0.23	18.51	3.10852	274.243	15.4	23.8	1.6	283.5	115.8	68														4.0401	1118.1			27.9841	27.9841			2.27563	2.27563
2019-12-05_15:00:00	2019-12-06 01:00:00	0.07	18.86	16.14	0.88	0	0	290.79	2.92	-0.59	17.64	2.97901	281.423	16.9	21.6	0.8	287.5	98.9	78														0.5776	851.939			15.6816	41.7316			4.74808	4.74808
2019-12-05_16:00:00	2019-12-06 02:00:00	0.06	23.7	20.76	1.16	0	0	290.04	2.68	-1.02	16.89	2.86754	290.837		19.4	1	133.9	135.2	120														430.978	1719.6			6.3001	88.5481			3.48771	3.48771
2019-12-05_17:00:00	2019-12-06 03:00:00	0.05	30.18	26.77	1.51	0	0	289.21	2.49	-1.39	16.06	2.8517	299.172	-2	17.8	0.7	181.5	68.2	145														827.713	1403.1			3.0276	140.186			4.62982	4.62982
2019-12-05_18:00:00	2019-12-06 04:00:00	0.05	32.68	29.13	1.66	0	0	288.81	2.57	-1.56	15.66	3.00641	301.258	17.4	15.8	0.8	225.1	57.9	225														137.593	246.427			0.0196	202.778			4.86824	4.86824
2019-12-05_19:00:00	2019-12-06 05:00:00	0.03	34.06	30.43	1.73	0	0	288.63	2.62	-1.53	15.48	3.03402	300.284	21.9	15.1	0.5	293.5	52.5	251														72.7609	97.9704			0.1444	228.614			6.42128	6.42128
2019-12-05_20:00:00	2019-12-06 06:00:00	0.03	40.62	36.39	2.08	0	0	294.15	0.92	-0.72	21	1.16825	308.047	26.2	15.4	0.6	301.5	75.5	285														103.836	103.836			31.36	86.49			0.322904	2.94381
2019-12-05_21:00:00	2019-12-06 07:00:00	0.02	40.12	35.96	2.05	0	0	298.11	0.16	-0.82	24.96	0.835464	348.959	18.2	19.5	0.1	19.1	53.7	778														315.418	315.418			29.8116	29.8116			0.540907	6.49504
2019-12-05_22:00:00	2019-12-06 08:00:00	0.01	31.05	27.8	1.59	0	0	301.2	0.7	-1.19	28.05	1.38062	329.535	15.7	21.1	1.1	50.6	70.5	444														146.41	350.738			48.3025	48.3025			0.0787452	1.00678
2019-12-05_23:00:00	2019-12-06 09:00:00	0	7.29	6.39	0.35	0	0	304.08	3.56	-0.42	30.93	3.58469	276.729	23.8	23.8	1.7	41.2	87.2	212														303.108	1026.43			50.8369	81.5409			3.55206	3.55206
2019-12-06_00:00:00	2019-12-06 10:00:00	0	4.63	4.02	0.22	0	0	305.53	5.87	0.59	32.38	5.89958	264.26	79.2	28.7	2.7	295.5	88.1	181														5652.03	5652.03			13.5424	236.544			10.2373	26.1691
2019-12-06_01:00:00	2019-12-06 11:00:00	0	0.39	0.33	0.02	0	0	302.17	1.99	1.14	29.02	2.2934	240.193	75.7	30.6	3.2	288.8	20.3	919														5680.64	5680.64			2.4964	193.766			0.821917	4.0377
2019-12-06_02:00:00	2019-12-06 12:00:00	0	2.07	1.86	0.11	0	0	303	0.71	1.7	29.85	1.84231	202.668	28.8	31.8	3.6	278.4	12.2	1457														725.764	996.539			3.8025	254.403			3.08948	3.83497
2019-12-06_03:00:00	2019-12-06 13:00:00	0	2.26	1.97	0.12	0	0	303.59	-2.88	1.78	30.44	3.38568	121.718	14.4	32.7	5.3	268.7	16.3	1585														154.505	2102.96			5.1076	304.154			3.66464	27.0574
2019-12-06_04:00:00	2019-12-06 14:00:00	0	4.96	3.77	0.21	0	0	301.92	-6.46	0.25	28.77	6.46484	92.2161	6.9	34.1	5.6	281.5		1443														9.7969	2658.23			28.4089	294.809			0.747941	73.6307
2019-12-06_05:00:00	2019-12-06 15:00:00	0	10.36	7.83	0.42	0	0	300.9	-6.8	-0.74	27.75	6.84015	83.7895	1.1	34.6	6.3	284	20.3	1669														45.2929	2840.68			46.9225	277.222			0.291758	93.2412
2019-12-06_06:00:00	2019-12-06 16:00:00	0	10.54	7.5	0.39	0	0	299.64	-6.16	-1.3	26.49	6.29568	78.0834	0.2	34.5	5.8	279.7	18.6	1207														53.29	2973.3			64.1601	233.784			0.2457	74.1611
2019-12-06_07:00:00	2019-12-06 17:00:00	0	13.74	9.64	0.49	0	0	298.2	-4.93	-1.32	25.05	5.10366	75.0109	4.8	33.9	4.4	274.8	19.4	1345														23.4256	2283.69			78.3225	175.563			0.495131	36.2363
2019-12-06_08:00:00	2019-12-06 18:00:00	0	16.05	11.11	0.56	0	0	296.62	-3.51	-1.02	23.47	3.6552	73.7964	3.3	33.1	3.1	278.5	16.9	2344														60.9961	2286.56			92.7369	118.157			0.308249	10.7008
2019-12-06_09:00:00	2019-12-06 19:00:00	0	17.46	11.27	0.53	0	0	293.4	-1.67	0.43	20.25	1.72447	104.439	6.9	31.1	1.8	264.2	25.3	3732														19.0969	1941.11			117.723	117.723			0.00570464	0.00570464
2019-12-06_10:00:00	2019-12-06 20:00:00	0	15.6	8.39	0.33	0	0	292.09	-1.16	1.69	18.94	2.0498	145.535		21.9	3.7	148.2	96.3	83														70.3921	2898.53			8.7616	23.6196			2.72314	5.13387
2019-12-06_11:00:00	2019-12-06 21:00:00	0	14.93	7.25	0.25	0	0.01	290.94	-1.35	1.51	17.79	2.02549	138.202	30.5	21	2.3	169.5	70	69														540.562	599.172			10.3041	47.7481			0.0753571	0.708101
2019-12-06_12:00:00	2019-12-06 22:00:00	0	15.05	7.8	0.29	0	0.01	290.19	-1.56	0.18	17.04	1.57035	96.5818	36.6	20.9	2.3	178.2	45.3	62														829.44	829.44			14.8996	60.2176			0.532389	0.532389
2019-12-06_13:00:00	2019-12-06 23:00:00	0	16.15	8.82	0.35	0	0.01	289.76	-0.07	0.68	16.61	0.683593	174.123	21.8	20.3	2.5	176.4	39	46														168.48	999.066			13.6161	77.2641			3.29933	3.29933
2019-12-06_14:00:00	2019-12-07 00:00:00	0	17.7	10.17	0.42	0	0.01	289.11	0.45	1.23	15.96	1.30973	200.095	23.1	19.2	1.2	148.3	36.9	50														167.185	838.566			10.4976	111.092			0.0120413	0.949197
2019-12-06_15:00:00	2019-12-07 01:00:00	0	18.02	10.38	0.43	0	0.01	288.6	0.58	1.55	15.45	1.65496	200.515	21.3	18.7	0.3	139.8	35.6	66														119.246	933.18			10.5625	133.402			1.83592	2.33796
2019-12-06_16:00:00	2019-12-07 02:00:00	0	17.81	10.14	0.41	0	0.01	288.21	0.57	1.61	15.06	1.70792	199.496	19.6	17.8	0.3	230.8	36.6	73														89.4916	1055.47			7.5076	164.866			1.98225	2.1788
2019-12-06_17:00:00	2019-12-07 03:00:00	0	17.81	10.07	0.4	0	0.01	287.8	0.62	1.73	14.65	1.83774	199.717	14.3	16.9	0.4	279.7	34.4	65														17.8929	1433.23			5.0625	200.222			2.06711	2.06711
2019-12-06_18:00:00	2019-12-07 04:00:00	0	18.12	10.27	0.4	0	0.01	287.44	0.62	1.92	14.29	2.01762	197.896	17	15.6	0.1	99.2	31.3	235														45.2929	1222.06			1.7161	249.956			3.67728	3.67728
2019-12-06_19:00:00	2019-12-07 05:00:00	0	19.12	11.17	0.45	0	0.01	287.17	0.65	1.64	14.02	1.76411	201.62	24.8	14.4	0.4	295	23.3	2169														185.777	689.483			0.1444	298.598			1.86081	1.86081
2019-12-06_20:00:00	2019-12-07 06:00:00	0	21.26	13.1	0.54	0	0.01	290.68	0.54	1.25	17.53	1.36165	203.364	23.1	14.3	0.1	163.9	28.9	1630														100	677.457			10.4329	192.377			1.59177	4.08989
2019-12-06_21:00:00	2019-12-07 07:00:00	0	24.88	17.38	0.76	0	0.01	292.91	0.11	1.04	19.76	1.0458	186.038	10.6	17.6	0.4	293	35.4	913														45.9684	1172.93			4.6656	69.5556			0.417059	4.15425
2019-12-06_22:00:00	2019-12-07 08:00:00	0	33.46	26.24	1.21	0.01	0.01	295.04	0	1.15	21.89	1.15	180	2.6	20.1	0.9	50.5	52.2	686														558.85	1114.76			3.2041	13.7641			0.0625	2.05636
2019-12-06_23:00:00	2019-12-07 09:00:00	0	46.36	39.23	1.85	0.01	0.01	297.59	-0.34	1.06	24.44	1.11319	162.216	37.4	21.7	1.3	23.1	146	653														3.3489	207.418			7.5076	7.5076			0.0348966	1.14663
2019-12-07_00:00:00	2019-12-07 10:00:00	0	53.28	46.23	2.2	0.01	0.01	300.24	-0.64	0.92	27.09	1.12071	145.175	96.1	23.3	2.2	59.1	202.2	1125														2487.02	6416.33			14.3641	21.9961			1.16486	1.16486
2019-12-07_01:00:00	2019-12-07 11:00:00	0	53.93	48.02	2.3	0.01	0.01	303.31	-1.01	0.22	30.16	1.03368	102.288	154.6	25.4	2	58.4	282.8	1058														11359.3	19709.9			22.6576	97.2196			0.933769	0.933769
2019-12-07_02:00:00	2019-12-07 12:00:00	0	42.91	38.58	1.88	0	0	305.57	-1.01	-0.25	32.42	1.04048	76.0975	245.2	27.6	1.6	81.6	309.2	1040														42691.8	49085.3			23.2324	205.062			0.313062	0.711525
2019-12-07_03:00:00	2019-12-07 13:00:00	0	43.26	39.02	1.93	0	0.01	306.88	-1.18	-0.38	33.73	1.23968	72.1498	265.5	28.9	2.4	55.9	353.6	1054														51293.2	58705.4			23.3289	286.625			1.34635	1.34635
2019-12-07_04:00:00	2019-12-07 14:00:00	0	52.41	47.38	2.43	0.01	0.01	307.74	-1.52	-0.49	34.59	1.59703	72.1325	311.5	29.5	2.2	56.4	441.4	971														69759.4	88002.4			25.9081	338.192			0.363575	0.363575
2019-12-07_05:00:00	2019-12-07 15:00:00	0	86.44	78.06	4.23	0.01	0.01	307.93	-2.7	-0.52	34.78	2.74962	79.0989	328.1	29.7	2.8	72.9	338.7	1165														62520	118289			25.8064	352.688			0.00253833	4.26678
2019-12-07_06:00:00	2019-12-07 16:00:00	0	154.09	135.95	7.57	0.02	0.02	305.53	-5.53	-1.33	32.38	5.68769	76.477	215.8	27.4	3.5	80.1	96	971														6376.02	83823			24.8004	198.246			4.78598	32.5321
2019-12-07_07:00:00	2019-12-07 17:00:00	0	92.2	75.78	3.93	0.01	0.01	302.16	-5.14	-1.72	29.01	5.42015	71.4983	96.4	25.7	2.7	93.4	68.5	1367														425.184	12089.4			10.9561	81.1801			7.3992	21.4939
2019-12-07_08:00:00	2019-12-07 18:00:00	0	112.98	93.01	4.98	0.01	0.01	299.53	-3.45	-1.41	26.38	3.72701	67.7705	57.7	23.9	2	83.9	59.3	4972														1246.8	7829.06			6.1504	20.9764			2.98256	5.03109
2019-12-07_09:00:00	2019-12-07 19:00:00	0	150.32	126.07	7	0.02	0.01	295.99	-1.5	-1.18	22.84	1.90851	51.8092	38.7	22.5	1.2	97	50.7	6765														7633.52	10514.9			0.1156	0.1296			0.501983	0.501983
2019-12-07_10:00:00	2019-12-07 20:00:00	0	191.82	164.29	9.18	0.02	0.02	294.94	1.25	-0.31	21.79	1.28787	283.928	31.2	19.9	0.4	144.6	46.7	8613														17712.9	17758.8			3.5721	16.0801			0.788307	3.2261
2019-12-07_11:00:00	2019-12-07 21:00:00	0	205.18	177.68	9.84	0.02	0.02	294.8	1.4	-0.17	21.65	1.41028	276.923		18.5	0.8	137.1	48.5	8134														31570.2	31570.2			9.9225	30.8025			0.372446	1.62235
2019-12-07_12:00:00	2019-12-07 22:00:00	0	209.06	181.96	9.97	0.02	0.02	295.02	0.63	-0.31	21.87	0.70214	296.2	19.3	17.2	0.8	225.8	47.1	9991														26458.3	26458.3			21.8089	43.9569			0.00957666	3.92777
2019-12-07_13:00:00	2019-12-07 23:00:00	0	188.53	163.83	8.85	0.02	0.02	294.29	0.16	-1.06	21.14	1.07201	351.416	19	16.9	0.9	196.1	47	13491														20975.7	20975.7			17.9776	58.6756			0.0295866	2.28612
2019-12-07_14:00:00	2019-12-08 00:00:00	0	157.01	135.94	7.24	0.02	0.02	293.19	0.44	-1.81	20.04	1.86271	346.337	8.6	18.1	0.7	221.7	35.5	9496														16215.5	16215.5			3.7636	57.1536			1.3519	1.3519
2019-12-07_15:00:00	2019-12-08 01:00:00	0	134.24	116.26	6.12	0.01	0.01	292.85	0.52	-1.72	19.7	1.79689	343.179	6	18.5	0.7	191.4	32.3	2553														12157.3	12157.3			1.44	56.25			1.20316	1.20316
2019-12-07_16:00:00	2019-12-08 02:00:00	0	122.32	106.45	5.55	0.01	0.01	292.22	0.07	-2.12	19.07	2.12116	358.109	5.1	18.8	0.5	144	28.8	1707														10271.8	10271.8			0.0729	61.3089			2.62814	2.62814
2019-12-07_17:00:00	2019-12-08 03:00:00	0	123.64	108.99	5.68	0.01	0.01	291.66	0.29	-2.28	18.51	2.29837	352.751	10.1	19.1	0.7	124.1	29.9	1244														9779.23	9779.23			0.3481	65.4481			2.55478	2.55478
2019-12-07_18:00:00	2019-12-08 04:00:00	0	121.67	108.54	5.63	0.01	0.01	291.25	0.78	-1.76	18.1	1.9251	336.098	12.9	18.6	0.5	160.6	32.3	953														9147.01	9147.01			0.25	81			2.0309	2.0309
2019-12-07_19:00:00	2019-12-08 05:00:00	0	105.11	94.19	4.85	0.01	0.01	291.15	1.37	-1.47	18	2.00943	317.017	17.7	18.4	0.4	137.9	32.6	916														5850.72	5850.72			0.16	86.49			2.59026	2.59026
2019-12-07_20:00:00	2019-12-08 06:00:00	0	92.44	83.09	4.26	0.01	0.01	295.19	-0.41	-2.3	22.04	2.33626	10.1075	20.5	18.3	0.4	279.4	39.5	839														3917.51	3917.51			13.9876	28.7296			3.74909	3.74909
2019-12-07_21:00:00	2019-12-08 07:00:00	0	86.11	77.44	3.97	0.01	0.01	300	-0.28	-2.01	26.85	2.02941	7.93055	17.4	19.6	0.8	189.3	41.2	1141														3604.8	3604.8			52.5625	52.5625			1.51145	1.51145
2019-12-07_22:00:00	2019-12-08 08:00:00	0	69.11	62.11	3.19	0.01	0.01	304.73	-0.15	-2.28	31.58	2.28493	3.76411	9.5	20.4	0.3	146.3	34.7	1010														2767.81	2767.81			124.992	124.992			3.93994	3.93994
2019-12-07_23:00:00	2019-12-08 09:00:00	0	42.83	38.47	1.97	0.01	0.01	308.99	1.15	-2.73	35.84	2.96233	337.157	10.7	21.6	1.1	39.2	30.7	796														771.173	771.173			202.778	202.778			3.46827	3.46827
2019-12-08_00:00:00	2019-12-08 10:00:00	0	20.6	18.58	0.92	0	0	311.19	2.52	-2.6	38.04	3.62083	315.895	20.8	23	1.5	51.5	59.7	713														4.9284	522.031			226.202	235.316			4.49791	4.49791
2019-12-08_01:00:00	2019-12-08 11:00:00	0	20.6	18.56	0.97	0	0	312.12	2.14	-2.39	38.97	3.20807	318.159	48.4	24.7	1.7	96.9	120.6	478														890.426	890.426			203.633	322.921			2.27427	2.27427
2019-12-08_02:00:00	2019-12-08 12:00:00	0.02	23.18	20.83	1.13	0	0	312.92	1.55	-2.06	39.77	2.578	323.041	78.2	26.1	1.8	98.6	105.8	347														3291.32	3291.32			186.869	406.829			0.605289	0.799242
2019-12-08_03:00:00	2019-12-08 13:00:00	0.08	24.23	21.59	1.21	0	0	313.51	1.03	-1.5	40.36	1.81959	325.524	80.4	27.2	2.2	73	96.6	300														3458.62	3458.62			173.186	477.86			0.144713	0.286854
2019-12-08_04:00:00	2019-12-08 14:00:00	0.2	24.33	21.17	1.19	0	0	313.85	0.61	-0.48	40.7	0.776209	308.199	67.7	27	3.4	85.8	69.9	297														2165.04	2165.04			187.69	484			6.88428	6.88428
2019-12-08_05:00:00	2019-12-08 15:00:00	0.36	24.87	21	1.17	0	0	313.95	0.65	0.55	40.8	0.851469	229.764	48.4	26.5	3.6	86.1	61.5	340														750.76	750.76			204.49	466.56			7.55442	7.55442
2019-12-08_06:00:00	2019-12-08 16:00:00	0.51	22.65	18.29	0.99	0	0	313.51	0.15	2.37	40.36	2.37474	183.621	35.3	24.9	3.9	82.7	49	320														289.34	289.34			239.012	382.594			2.32641	7.78824
2019-12-08_07:00:00	2019-12-08 17:00:00	0.41	32.48	27.13	1.47	0	0	311.75	-3.74	3.49	38.6	5.11544	133.019	27.2	23.1	3.5	89.4	36.1	274														0.0049	62.3784			240.25	256			2.60964	26.3316
2019-12-08_08:00:00	2019-12-08 18:00:00	0.01	97.01	85.82	4.93	0.01	0.01	306.99	-4.32	-2.13	33.84	4.81657	63.7543	13.8	22.2	2.6	96.4	28.2	313														5186.88	5186.88			135.49	135.49			4.91316	15.4651
2019-12-08_09:00:00	2019-12-08 19:00:00	0	91.37	80.61	4.6	0.01	0.02	303.86	-4.19	-3.57	30.71	5.50463	49.5682	11.6	21.8	2.3	79.6	26.1	2184														4762.38	4762.38			79.3881	79.3881			10.2697	18.6679
2019-12-08_10:00:00	2019-12-08 20:00:00	0	67.11	58.05	3.2	0.01	0.01	302.77	-2.31	-3.47	29.62	4.16857	33.6521	3.8	20.9	1.4	86.5	25.9	4691														2943.06	2943.06			76.0384	76.0384			7.665	7.665
2019-12-08_11:00:00	2019-12-08 21:00:00	0.01	59.37	50.36	2.68	0.01	0.02	299.16	1.9	-1.35	26.01	2.33077	305.395	15.8		1.2	91.7	26.8	3860														1194.39	1194.39			676.52	676.52			1.27865	1.27865
2019-12-08_12:00:00	2019-12-08 22:00:00	0.01	52.46	44.35	2.34	0.01	0.01	298.62	2.26	-1.69	25.47	2.822	306.789	15		1	99.9	25.2	3164														861.423	861.423			648.721	648.721			3.31969	3.31969
2019-12-08_13:00:00	2019-12-08 23:00:00	0.01	55.6	46.85	2.44	0.01	0.02	297.09	0.89	2.46	23.94	2.61605	199.889	10.7		1	109.1	24.8	2195														1306.82	1306.82			573.124	573.124			2.61161	2.61161
2019-12-08_14:00:00	2019-12-09 00:00:00	0.01	44.6	33.55	1.52	0.01	0.03	295.96	-1.38	2.08	22.81	2.49616	146.437	9		0.8	127.3	25.7	1857														602.702	602.702			520.296	523.952			2.87695	2.87695
2019-12-08_15:00:00	2019-12-09 01:00:00	0.01	48.81	34.27	1.3	0.01	0.03	294.57	0.41	2.49	21.42	2.52353	189.35	6.9		0.9	120.5	24.4	1258														749.117	749.117			458.816	589.518			2.63585	2.63585
2019-12-08_16:00:00	2019-12-09 02:00:00	0.03	56.22	40.58	1.49	0.01	0.03	293.2	1.04	2.21	20.05	2.44248	205.201	10.2		0.5	136.7	23.8	662														922.944	922.944			402.003	657.922			3.77322	3.77322
2019-12-08_17:00:00	2019-12-09 03:00:00	0.04	57.71	42.72	1.59	0.01	0.03	292.48	0.87	2.4	19.33	2.55282	199.926	8.6		0.4	252.5	22.6	328														1164.17	1164.17			373.649	695.377			4.63464	4.63464
2019-12-08_18:00:00	2019-12-09 04:00:00	0.05	57.66	42.67	1.56	0.01	0.03	291.57	-0.53	1.76	18.42	1.83807	163.241	8.3		0.6	199.7	24	303														1181.3	1181.3			339.296	744.198			1.53282	1.53282
2019-12-08_19:00:00	2019-12-09 05:00:00	0.04	57.6	42.1	1.5	0.01	0.03	290.86	-0.67	1.14	17.71	1.32231	149.556	9.8		0.5	204	30.3	257														1043.29	1043.29			313.644	783.44			0.676191	2.76122
2019-12-08_20:00:00	2019-12-09 06:00:00	0.04	57.62	41.85	1.49	0.01	0.03	294.06	-0.18	0.23	20.91	0.292062	141.953	11.7		0.5	256.2	31.6	273														909.023	909.023			437.228	614.544			0.0432384	7.24653
2019-12-08_21:00:00	2019-12-09 07:00:00	0.05	55.66	41.95	1.57	0.01	0.03	296.53	-0.02	-1.21	23.38	1.21017	0.947028	13.7		0.7	215.6	35.5	326														798.063	798.063			546.624	546.624			0.260269	2.47696
2019-12-08_22:00:00	2019-12-09 08:00:00	0.08	52.09	40.73	1.66	0.01	0.02	300.17	-1.06	-1.52	27.02	1.85311	34.8908	11.9		0.2	261	70.1	351														831.169	831.169			730.08	730.08			2.73276	2.73276
2019-12-08_23:00:00	2019-12-09 09:00:00	0.08	40.07	32.9	1.52	0.01	0.01	305.22	-0.23	-2.81	32.07	2.8194	4.67934	64.4		1.2	21.4	176.9	248														992.25	1230.05			1028.48	1028.48			2.62245	2.62245
2019-12-09_00:00:00	2019-12-09 10:00:00	0.02	16.73	14.47	0.78	0	0	310.53	0.67	-3.52	37.38	3.5832	349.223	107.5		0.7	34.1	184.1	243														8654.58	8654.58			1397.26	1397.26			8.31282	8.31282
2019-12-09_01:00:00	2019-12-09 11:00:00	0.1	7.46	5.89	0.33	0	0	313.67	2.93	-4.08	40.52	5.02308	324.317	124.5		2	67.1	201.5	176														14068.3	14068.3			1641.87	1641.87			9.13899	12.5251
2019-12-09_02:00:00	2019-12-09 12:00:00	0.27	20.09	16.63	1	0	0	314.98	3.61	-3.6	41.83	5.09824	314.921	141.7		2	80.2	231.1	305														15642.5	15642.5			1749.75	1749.75			9.59912	13.0628
2019-12-09_03:00:00	2019-12-09 13:00:00	0.52	34.04	27.47	1.67	0	0	315.36	4.08	-4.11	42.21	5.79124	315.21	158.9		2.2	84.8	239.3	395														17273.8	17273.8			1781.68	1781.68			12.897	20.3152
2019-12-09_04:00:00	2019-12-09 14:00:00	1.18	71.34	57.21	3.48	0.01	0	313.79	3.96	-2.46	40.64	4.66189	301.849	196.5		2.5	80.6	348.4	459														19401.7	36665.4			1651.61	1651.61			4.67376	13.5269
2019-12-09_05:00:00	2019-12-09 15:00:00	2.91	106.48	79.48	4.7	0.01	0.01	313.01	0.84	-2.9	39.86	3.01921	343.846	261.6		2.9	76.7	319.6	710														33167.7	77758.4			1588.82	1588.82			0.0142099	5.93022
2019-12-09_06:00:00	2019-12-09 16:00:00	4.36	97.6	64.81	3.63	0.01	0	313.28	0.11	-2.21	40.13	2.21274	357.151	168.7		3.1	87.3	110	564														10793.1	29337.5			1610.42	1610.42			0.787238	3.34427
2019-12-09_07:00:00	2019-12-09 17:00:00	4.39	119.68	85.25	4.86	0.01	0.01	312.52	-1.5	-0.61	39.37	1.61929	67.8702	73.7	27.1	3	70.8	67.3	2784														133.402	9355.15			150.553	431.393			1.90636	1.90636
2019-12-09_08:00:00	2019-12-09 18:00:00	1.75	326.82	285.69	17.32	0.04	0.02	308.56	-4.87	-2.98	35.41	5.7094	58.5373	33.8	25.6	2.5	76	37.3	5992														63448.6	66183.7			96.2361	234.396			10.3003	22.3294
2019-12-09_09:00:00	2019-12-09 19:00:00	2.07	233.46	198.81	12.04	0.03	0.02	306.26	-3.1	-4.07	33.11	5.11614	37.2956	29.9	24.2	1.6	86.3	49.5	5481														28530.6	28530.6			79.3881	134.792			12.3632	12.3632
2019-12-09_10:00:00	2019-12-09 20:00:00	1.9	236.78	203.9	12.27	0.03	0.02	304.86	-1.1	-4.03	31.71	4.17743	15.2672	29.6	22.9	0.9	106.4	44.5	5260														30380.5	30380.5			77.6161	79.3881			10.7415	10.7415
2019-12-09_11:00:00	2019-12-09 21:00:00	2.2	170.42	142.39	8.33	0.02	0.01	301.68	0.39	-3.07	28.53	3.09467	352.76	28.6	21.5	0.5	140	27.6	5572														12948.2	12948.2			49.4209	49.4209			6.73233	6.73233
2019-12-09_12:00:00	2019-12-09 22:00:01	3.29	147.22	115.85	6.55	0.01	0.01	299.67	1.15	-2.82	26.52	3.04547	337.814	25.1	20.1	0.3	171.8	28.6	3318														8235.56	8235.56			41.2164	41.2164			7.53762	7.53762
2019-12-09_13:00:00	2019-12-09 23:00:01	4.93	100.42	65.16	3.4	0.01	0.01	299.91	1.73	-3.1	26.76	3.55006	330.836	20.6	19.1	0.3	189.2	25.7	10099														1985.59	1985.59			58.6756	58.6756			10.5629	10.5629
2019-12-09_14:00:00	2019-12-10 00:00:01	5.1	96.68	61.09	3.07	0.01	0.01	299.85	1.58	3.29	26.7	3.64973	205.652	14.1	17.8	0.3	261.3	22.2															2208.06	2208.06			79.21	79.21			11.2207	11.2207
2019-12-09_15:00:00	2019-12-10 01:00:01	1.98	104.74	77.04	3.8	0.01	0.03	297.21	-0.55	3.14	24.06	3.1878	170.065	11.4	17.2	0.3	240.3	19.8															4308.61	4308.61			47.0596	47.0596			8.33942	8.33942
2019-12-09_16:00:00	2019-12-10 02:00:01	1.42	97.67	71.91	3.35	0.01	0.03	294.14	-1.85	1.11	20.99	2.15745	120.964	14.2	16.7	0.3	309.5	16.5															3330.44	3330.44			18.4041	64.1601			3.45013	3.45013
2019-12-09_17:00:00	2019-12-10 03:00:01	1.44	102.25	76.2	3.54	0.01	0.03	293.85	-0.54	-0.35	20.7	0.643506	57.0509	12.9	16	0.2	239.7	6															4006.89	4006.89			22.09	81			0.196698	6.97221
2019-12-09_18:00:00	2019-12-10 04:00:01	2.07	101.69	74.43	3.5	0.01	0.02	294.33	-0.03	-2.92	21.18	2.92015	0.588711	13.4	15.8	0.2	32	20.4															3724.66	3724.66			28.9444	76.0384			7.39924	7.39924
2019-12-09_19:00:00	2019-12-10 05:00:01	2.66	101.47	72.99	3.46	0.01	0.02	293.63	-1.57	-1.4	20.48	2.10354	48.2761	18.5	14.7	0.3	174.7	14.1															2969.16	2969.16			33.4084	110.67			3.25277	3.25277
2019-12-09_20:00:00	2019-12-10 06:00:01	1.76	105.21	78.22	3.57	0.01	0.02	296	-2.73	0.56	22.85	2.78684	101.592	21.1	14.9	0.1	130.1	27.3															3262.69	3262.69			63.2025	63.2025			7.21913	7.21913
2019-12-09_21:00:00	2019-12-10 07:00:01	0.94	86.03	63.08	2.66	0.01	0.02	297.85	-2.03	1.66	24.7	2.62231	129.274	15.1	16.3	0.4	145.8	54.2															2302.08	2302.08			70.56	70.56			4.93865	4.93865
2019-12-09_22:00:00	2019-12-10 08:00:01	0.77	62.77	42.5	1.56	0.01	0.02	299.34	-1.97	2.66	26.19	3.31006	143.476	10.7	19.8	0.9	94.5	68.4															1011.24	1011.24			40.8321	40.8321			5.80839	5.80839
2019-12-09_23:00:00	2019-12-10 09:00:01	0.85	51.25	31.93	1.06	0.01	0.02	300.9	-1.87	3.33	27.75	3.81914	150.683	41.8	22.4	0.6	73.2	217.8															97.4169	132.296			28.6225	28.6225			10.3628	10.3628
2019-12-10_00:00:00	2019-12-10 10:00:01	0.97	40.24	21.12	0.62	0	0.01	302.36	-2.81	2.54	29.21	3.78784	132.111	193.1	25.4	0.6	63.2	577.2															29577.1	29577.1			14.5161	79.3881			10.1623	10.1623
2019-12-10_01:00:00	2019-12-10 11:00:01	0.93	34.59	15.25	0.4	0	0.01	303.2	-2.83	2.89	30.05	4.04487	135.601	361.2	29.3	0.8	79	776.8															119681	119681			0.5625	186.323			10.5292	10.5292
2019-12-10_02:00:00	2019-12-10 12:00:01	0.98	34.81	14.49	0.35	0	0.01	303.57	-3.47	1.86	30.42	3.93707	118.192	491.3	33.4	0.8	93.2	805.4															227348	227348			8.8804	328.334			9.84119	9.84119
2019-12-10_03:00:00	2019-12-10 13:00:01	0.84	37.82	15.24	0.33	0	0.01	304.07	-3.53	2.93	30.92	4.58757	129.694	513	38.5	1.1	57.1	514															247765	247765			57.4564	562.638			12.1631	12.1631
2019-12-10_04:00:00	2019-12-10 14:00:01	0.46	42.09	15.33	0.19	0	0.01	301.86	-4.12	3.6	28.71	5.47123	131.146	371.9	41.1	2.3	98.1	103.8															127142	127142			153.512	581.292			10.0567	18.3804
2019-12-10_05:00:00	2019-12-10 15:00:01	0.38	46.28	16.1	0.11	0	0.01	300.07	-3.67	4.09	26.92	5.49518	138.098		32	4.2	147.7	445.6															259.21	2127.79			25.8064	174.768			1.67749	38.5788
2019-12-10_06:00:00	2019-12-10 16:00:01	0.37	44.52	15.09	0.06	0	0.01	298.66	-3.3	4.05	25.51	5.22422	140.826		26.9	3.5	140.1	193.1															227.708	2221.99			1.9321	45.0241			2.97294	27.4599
2019-12-10_07:00:00	2019-12-10 17:00:01	0.33	41.71	13.83	0.04	0	0.01	297.26	-2.75	4.32	24.11	5.12103	147.52	98.5	24.2	1.5	122	95.9															7169.01	7169.01			0.0081	6.8121			13.1118	13.1118
2019-12-10_08:00:00	2019-12-10 18:00:01	0.21	44.28	14.9	0.04	0	0.01	295.29	-2.48	4.28	22.14	4.94659	149.91	62.3	23.3	2.2	132.9	46.2															2246.76	2246.76			1.3456	1.3456			7.54378	13.4146
2019-12-10_09:00:00	2019-12-10 19:00:01	0.11	47.37	16.27	0.05	0	0.01	293.34	-1.69	3.41	20.19	3.80581	153.637	37.8	22	2.2	128.7	25.1															463.541	463.541			3.2761	12.3201			2.57863	6.35953
2019-12-10_10:00:00	2019-12-10 20:00:01	0.05	48.81	16.87	0.04	0	0.01	291.92	-0.74	1.95	18.77	2.08569	159.219	24.4	20.4	2.1	139	24.9															56.7009	439.238			2.6569	42.6409			0.000204795	0.492368
2019-12-10_11:00:00	2019-12-10 21:00:01	0.03	46.48	15.88	0	0	0.01	291.12	-0.29	2.39	17.97	2.40753	173.082	17.5	19.4	1.7	150.1	19.9															2.6244	832.207			2.0449	69.3889			0.500598	0.500598
2019-12-10_12:00:00	2019-12-10 22:00:01	0.01	43.73	15.07	0	0	0.01	290.44	0.29	2.7	17.29	2.71553	186.13	17.5	18.8	1.7	163.5	17															5.9049	879.597			2.2801	92.3521			1.0313	1.0313
2019-12-10_13:00:00	2019-12-10 23:00:01	0	41.03	14.45	0.02	0	0.01	289.78	0.75	2.84	16.63	2.93736	194.793	13.4	18.2	1.7	164.1	14.2															1.1025	1181.85			2.4649	118.157			1.53107	1.53107
2019-12-10_14:00:00	2019-12-11 00:00:01	0	39.92	14.71	0.06	0	0.01	288.64	1.23	2.24	15.49	2.55548	208.771	16.3	17.5	1.6	165.5	14.9															2.5281	974.564			4.0401	161.544			0.91295	0.91295
2019-12-10_15:00:00	2019-12-11 01:00:01	0.01	40.36	16.34	0.18	0	0.01	287.6	1.64	1.83	14.45	2.45734	221.866	17.5	17.2	1.5	173.1	20.8															1.3456	805.879			7.5625	197.402			0.916492	0.916492
2019-12-10_16:00:00	2019-12-11 02:00:01	0.01	41.63	18.8	0.35	0	0	287.01	1.94	1.92	13.86	2.72947	225.297	13.5	15.9	1	204.2	19.8															28.09	895.685			4.1616	254.084			2.99106	2.99106
2019-12-10_17:00:00	2019-12-11 03:00:01	0.01	42.93	21.29	0.52	0	0	286.43	1.9	1.93	13.28	2.7083	224.551	15.8	15.1	1.4	241.6	21.4															30.1401	631.919			3.3124	299.982			1.71165	1.71165
2019-12-10_18:00:00	2019-12-11 04:00:01	0.01	43.78	23.43	0.67	0	0	286.06	1.9	2.19	12.91	2.89933	220.944	8.9	16.1	1.5	251.6	21															211.121	893.89			10.1761	278.556			1.95812	1.95812
2019-12-10_19:00:00	2019-12-11 05:00:01	0.01	43.98	24.48	0.74	0	0	285.5	1.77	2.05	12.35	2.70839	220.808	9	16.5	0.9	237.5	19.3															239.63	826.448			17.2225	283.922			3.27029	3.27029
2019-12-10_20:00:00	2019-12-11 06:00:01	0.01	42.59	23.1	0.66	0	0	288.21	1.87	2.73	15.06	3.30905	214.41	6.6	16.9	0.4	292.7	25.5															272.25	1058.07			3.3856	188.788			8.46256	8.46256
2019-12-10_21:00:00	2019-12-11 07:00:01	0	40.23	19.94	0.45	0	0	289.74	1.3	2.93	16.59	3.20545	203.926	13.4	17.7	0.7	185	70.6															42.7716	834.517			1.2321	130.188			6.27727	6.27727
2019-12-10_22:00:00	2019-12-11 08:00:01	0	36.22	16.71	0.28	0	0.01	291.11	0.41	2.58	17.96	2.61237	189.03	56.7	18.7	1.5	201.6	127.6															1599.2	1599.2			0.5476	81.7216			1.23738	1.23738
2019-12-10_23:00:00	2019-12-11 09:00:01	0	34.79	15.33	0.22	0	0.01	292.57	-0.45	2.3	19.42	2.34361	168.93	82	19.6	1.8	170.1	111.9															4444.89	4444.89			0.0324	44.6224			0.29551	0.435083
2019-12-11_00:00:00	2019-12-11 10:00:01	0	29.97	12.27	0.09	0	0.01	293.5	-1.32	1.74	20.35	2.18403	142.815	69.2	20.6	1.4	126.1	76.7															3241.02	3241.02			0.0625	22.5625			0.614708	0.614708
2019-12-11_01:00:00	2019-12-11 11:00:01	0	24.25	9.75	0.03	0	0.01	294.64	-2.02	1.25	21.49	2.37548	121.75	42.2	22.1	1.4	179.5	42.5															1053	1053			0.3721	4.4521			0.951559	0.951559
2019-12-11_02:00:00	2019-12-11 12:00:01	0.01	21.93	8.77	0.02	0	0	295.69	-3.14	0.93	22.54	3.27483	106.498	25.9	23.2	1.2	145.6	46.7															293.437	759.443			0.4356	0.4356			4.30491	4.30491
2019-12-11_03:00:00	2019-12-11 13:00:01	0.02	21.3	8.61	0.03	0	0	296.89	-3.3	1.15	23.74	3.49464	109.213	24.2	24.8	1.3	55.5	66															243.048	865.419			1.1236	8.0656			4.81644	4.81644
2019-12-11_04:00:00	2019-12-11 14:00:01	0.03	21.33	8.58	0.02	0	0	297.46	-4.3	1.5	24.31	4.55412	109.231	29.2	25.9	2.2	91	72.9															425.184	597.705			2.5281	20.3401			5.54188	10.6937
2019-12-11_05:00:00	2019-12-11 15:00:01	0.02	22.58	9	0.02	0	0	296.85	-4.84	1.31	23.7	5.01415	105.145	38.8	25.9	2.7	119.9	66.6															888.04	888.04			4.84	15.21			5.35529	17.8942
2019-12-11_06:00:00	2019-12-11 16:00:01	0.03	23.34	9.45	0.04	0	0	295.87	-4.79	1.26	22.72	4.95295	104.738	28.2	24.4	3.1	130.6	44.2															351.562	604.078			2.8224	2.8224			3.43342	20.8753
2019-12-11_07:00:00	2019-12-11 17:00:01	0.04	24.86	10.23	0.04	0	0	294.68	-4.76	1.36	21.53	4.95047	105.945	22.6	22.8	2.9	121.6	37.6															153.017	864.242			1.6129	1.8769			4.20445	19.0661
2019-12-11_08:00:00	2019-12-11 18:00:01	0.02	27.65	11.19	0.03	0	0	293.33	-4.24	1.03	20.18	4.36331	103.654	18.2	21	2.7	134.6	30.6															49.1401	1078.33			0.6724	20.4304			2.76661	12.8115
2019-12-11_09:00:00	2019-12-11 19:00:01	0.02	30.37	12.16	0.02	0	0	291.58	-2.55	0.26	18.43	2.56322	95.8217	14.8	20.1	2.3	121.7	27.6															6.9696	1243.83			2.7889	51.4089			0.0692851	1.90225
2019-12-11_10:00:00	2019-12-11 20:00:01	0.01	32.81	12.97	0.01	0	0	289.68	-1.72	0.45	16.53	1.77789	104.661	13.7	19.7	1.6	123.4	25.9	805														0.5329	1264.37			10.0489	89.6809			0.0316456	0.0316456
2019-12-11_11:00:00	2019-12-11 21:00:01	0.01	34.1	13.34	0.01	0	0	288.61	-1.58	0.54	15.46	1.66973	108.869	9.4	18.8	1.9	146.2	29.4	1251														15.5236	1559.3			11.1556	130.874			0.053024	0.053024
2019-12-11_12:00:00	2019-12-11 22:00:01	0	34.56	13.49	0	0	0	287.9	-1.13	0.42	14.75	1.20553	110.389	6.9	18.3	1.4	162.5	21.3	2172														43.4281	1750.42			12.6025	160.023			0.037819	0.771711
2019-12-11_13:00:00	2019-12-11 23:00:01	0.01	34.69	13.57	0	0	0	287.43	-0.06	0.13	14.28	0.143178	155.225	6.1	17.8	2.6	190.1	23.4	2103														55.8009	1811.18			12.3904	185.504			6.03597	6.03597
2019-12-11_14:00:00	2019-12-12 00:00:01	0.01	34.55	13.57	0.01	0	0.01	286.68	0.99	0.12	13.53	0.997246	263.089	9.2	17	2	212.8	17.4	1597														19.0969	1556.93			12.0409	230.129			1.00552	1.00552
2019-12-11_15:00:00	2019-12-12 01:00:01	0.01	34.23	13.51	0.01	0	0.01	286.22	1.2	0.84	13.07	1.46479	235.008	5.7	16.9	1.5	241.5	15.3	980														60.9961	1850.55			14.6689	247.433			0.00123998	0.269582
2019-12-11_16:00:00	2019-12-12 02:00:01	0.01	33.9	13.42	0.01	0	0.01	285.93	1.09	0.84	12.78	1.37612	232.381	8.4	17	1.6	238.3	16.7	780														25.2004	1632.81			17.8084	253.446			0.0501233	0.257944
2019-12-11_17:00:00	2019-12-12 03:00:01	0.01	33.73	13.37	0.01	0	0.01	285.56	1.4	0.85	12.41	1.63783	238.736	7.8	17.1	1.7	223.4	22	622														31.0249	1685.76			21.9961	262.116			0.00386462	0.0213645
2019-12-11_18:00:00	2019-12-12 04:00:01	0.01	33.52	13.21	0.01	0	0.01	287.91	0.79	1.01	14.76	1.28226	218.032	11.2	17.1	1.4	220.2	23.7	537														4.0401	1430.2			5.4756	191.546			0.0138619	0.642781
2019-12-11_19:00:00	2019-12-12 05:00:01	0.01	33.26	12.96	0.01	0	0.01	288.54	0.6	1.15	15.39	1.29711	207.553	18.9	17	1	240.5	25.4	453														35.2836	922.215			2.5921	177.156			0.0882756	1.4087
2019-12-11_20:00:00	2019-12-12 06:00:01	0.01	32.87	12.74	0.02	0	0.01	289.47	0.95	1.89	16.32	2.11533	206.686	15.6	17.4	1	250.2	26.7	431														8.1796	1148.4			1.1664	143.52			1.24395	1.24395
2019-12-11_21:00:00	2019-12-12 07:00:01	0.02	32.58	12.86	0.03	0	0.01	290.65	0.94	2.21	17.5	2.4016	203.042	18.9	18.1	1.1	241.2	29.4	380														36.4816	928.299			0.36	102.01			1.69417	1.69417
2019-12-11_22:00:00	2019-12-12 08:00:01	0.04	32.14	13.64	0.04	0	0.01	292.17	0.75	1.64	19.02	1.80336	204.575	17.7	19.1	0.4	202	26.5	342														16.4836	954.069			0.0064	57.4564			1.96941	1.96941
2019-12-11_23:00:00	2019-12-12 09:00:01	0.06	32.34	14.34	0.06	0	0.01	293.51	0.49	0.65	20.36	0.814002	217.011	12	20.2	0.7	184.9	27	286														5.4756	1287.95			0.0256	26.4196			0.0129966	3.88089
2019-12-12_00:00:00	2019-12-12 10:00:01	0.06	32.44	14.37	0.06	0	0.01	295.26	-0.34	-0.5	22.11	0.604649	34.2158	17	21.6	0.9	48.6	32.8	289														6.9169	952.216			0.2601	3.9601			0.0872324	3.91783
2019-12-12_01:00:00	2019-12-12 11:00:01	0.08	31.87	15.04	0.13	0	0.01	297.19	-1	-0.26	24.04	1.03325	75.4259	23.6	22.4	1.1	115.6	54	244														73.2736	556.394			2.6896	2.6896			0.00445592	1.82453
2019-12-12_02:00:00	2019-12-12 12:00:01	0.08	31.18	14.94	0.14	0	0.01	298.88	-1.99	-0.11	25.73	1.99304	86.8363	28.6	23.7	1.1	68.5	61.2	362														186.596	349.241			4.1209	13.9129			0.797517	0.797517
2019-12-12_03:00:00	2019-12-12 13:00:01	0.07	30.27	15.18	0.2	0	0	300.01	-3.12	-0.63	26.86	3.18297	78.5843		25.2	1.2	88.6		402														230.432	2213.51			2.7556	40.4496			3.93217	3.93217
2019-12-12_04:00:00	2019-12-12 14:00:01	0.05	31.79	16.42	0.3	0	0	299.67	-4.82	0.23	26.52	4.82548	92.7318	55	25.4	3.3	104.7	74.5	439														1488.42	1488.42			1.2544	38.6884			2.3271	21.5434
2019-12-12_05:00:00	2019-12-12 15:00:01	0.04	29.45	14.49	0.2	0	0	298.78	-5.64	0.92	25.63	5.71454	99.2644	32.8	24	3.4	118.9	48.5	672														335.256	335.256			2.6569	15.4449			5.35711	31.703
2019-12-12_06:00:00	2019-12-12 16:00:01	0.04	27.25	12.67	0.1	0	0	297.22	-6.06	1.91	24.07	6.35387	107.494	26.7	23	3.2	120.5	39.6	724														196.841	522.488			1.1449	1.8769			9.94691	36.8434
2019-12-12_07:00:00	2019-12-12 17:00:01	0.03	26.42	12.04	0.07	0	0	295.82	-5.46	1.61	22.67	5.69242	106.429	22.8	21.8	2.7	107.1	32.4	535														115.778	750.103			0.7569	1.5129			8.95461	24.0926
2019-12-12_08:00:00	2019-12-12 18:00:01	0.02	25.59	11.27	0.04	0	0	294.32	-4.61	1.51	21.17	4.851	108.136	21.4	20.5	2.4	113.1	28.1	594														102.617	873.675			0.4489	16.2409			6.0074	14.1903
2019-12-12_09:00:00	2019-12-12 19:00:01	0.02	25.27	11.08	0.03	0	0	293.27	-3.54	1.3	20.12	3.77115	110.165	13.6	19.7	2	115.6	25.3	877														6.3504	1409.85			0.1764	34.5744			3.13699	5.23107
2019-12-12_10:00:00	2019-12-12 20:00:01	0.02	24.9	10.86	0.03	0	0	292.58	-2.68	1.57	19.43	3.10601	120.363	12.8	19.2	1.4	128	25.8	1330														3.7636	1487.49			0.0529	49.9849			2.91047	2.91047
2019-12-12_11:00:00	2019-12-12 21:00:01	0.02	24.51	10.64	0.03	0	0	292.23	-1.83	1.78	19.08	2.5529	134.206	19.3	18.5	1	162.7	28.6	1677														74.9956	1042.51			0.3364	65.9344			2.4115	2.4115
2019-12-12_12:00:00	2019-12-12 22:00:01	0.01	24.27	10.47	0.03	0	0.01	292	-1.32	1.66	18.85	2.12085	141.509	22	18.1	1.3	168.9	19.2	1858														132.941	885.539			0.5625	76.5625			0.673793	0.673793
2019-12-12_13:00:00	2019-12-12 23:00:01	0.01	24.23	10.35	0.03	0	0.01	291.77	-0.86	1.21	18.62	1.48449	144.597	11.9	16.6	1.9	182.3	19.7	1548														2.4025	1598.24			4.0804	109.83			0.172652	0.172652
2019-12-12_14:00:00	2019-12-13 00:00:01	0.01	24.41	10.35	0.02	0	0.01	291.62	-0.76	1.07	18.47	1.31244	144.614	6.8	15.7	1.2	202.3	10.6	1111														12.6025	2032.03			7.6729	132.941			0.0126429	0.943928
2019-12-12_15:00:00	2019-12-13 01:00:01	0.01	24.96	10.57	0.02	0	0.01	291.4	-0.7	1.28	18.25	1.4589	151.327	3.6	15.7	1.1	221.5	9.2	955														48.5809	2309.57			6.5025	138.063			0.128812	0.855803
2019-12-12_16:00:00	2019-12-13 02:00:01	0	26.06	10.99	0.02	0	0.01	288.76	-0.6	1.32	15.61	1.44997	155.556	8.1	15.7	0.7	280.6	12.1	849														8.3521	1860.89			0.0081	207.072			0.562448	1.77965
2019-12-12_17:00:00	2019-12-13 03:00:01	0	27.03	11.26	0.01	0	0.02	290.4	-0.4	1.44	17.25	1.49452	164.476	10.9	15.7	0.7	271	15.8	687														0.1296	1605.44			2.4025	162.563			0.631267	1.66275
2019-12-12_18:00:00	2019-12-13 04:00:01	0	26.81	11.14	0.01	0	0.02	290.27	-0.42	1.63	17.12	1.68324	165.551	11.2	15.7	0.4	263.2	17.3	522														0.0036	1591.05			2.0164	165.894			1.64671	1.96213
2019-12-12_19:00:00	2019-12-13 05:00:01	0	24.57	10.23	0.02	0.01	0.02	290.16	-0.39	1.44	17.01	1.49188	164.846	20.9	15.4	0.2	276.2	20.4	544														113.849	967.086			2.5921	176.624			1.66895	3.2117
2019-12-12_20:00:00	2019-12-13 06:00:01	0	20.11	8.65	0.03	0	0.02	290.66	-0.42	1.95	17.51	1.99472	167.845	20.1	16.1	0.1	245	24.2	598														131.103	1120.78			1.9881	146.168			3.58996	3.58996
2019-12-12_21:00:00	2019-12-13 07:00:01	0	17.31	7.8	0.04	0	0.01	291.23	-0.63	1.86	18.08	1.9638	161.288	13	17.2	0.3	287.4	28.2	441														27.04	1716.28			0.7744	108.576			2.76822	2.76822
2019-12-12_22:00:00	2019-12-13 08:00:01	0	16.98	7.76	0.03	0	0.01	292.16	-0.53	1.7	19.01	1.7807	162.684	15.6	18.3	0.6	190.2	24.3	414														61.4656	1510.72			0.5041	70.3921			1.39406	1.39406
2019-12-12_23:00:00	2019-12-13 09:00:01	0	16.88	7.54	0.03	0	0.01	292.76	-0.38	1.72	19.61	1.76148	167.542	12	20.2	0.6	74.1	19.2	339														19.8916	1822.27			0.3481	34.6921			1.34903	1.34903
2019-12-13_00:00:00	2019-12-13 10:00:01	0	15.74	6.69	0.02	0	0.01	294.14	-1.67	1.83	20.99	2.47746	137.617	8.3	21	0.6	43.7	18.3	310														2.5921	2231.43			0.0001	13.7641			3.52485	3.52485
2019-12-13_01:00:00	2019-12-13 11:00:01	0	14.12	5.69	0.02	0	0	295.18	-2.46	1.42	22.03	2.84042	119.995	13.7	22.1	1.4	61.1	44.5	227														64.1601	1835.09			0.0049	2.4649			2.07482	2.07482
2019-12-13_02:00:00	2019-12-13 12:00:01	0	13.38	5.29	0.02	0	0	296.26	-3.12	1.03	23.11	3.28562	108.269		23.4	2	47.9	43.3	337														27.9841	3241.94			0.0841	0.6561			1.65282	3.24584
2019-12-13_03:00:00	2019-12-13 13:00:01	0	14.78	5.69	0.01	0	0	296.12	-3.71	1	22.97	3.84241	105.085		24.4	2	59.6		367														32.3761	3196.55			2.0449	2.7889			3.39447	5.56209
2019-12-13_04:00:00	2019-12-13 14:00:01	0	19.22	7.27	0.01	0	0	295.71	-4.53	0.95	22.56	4.62854	101.844		24.9	1.2	83		402														52.8529	3020.38			5.4756	5.4756			11.7549	11.7549
2019-12-13_05:00:00	2019-12-13 15:00:01	0	23.38	9	0.01	0	0	295.38	-4.86	1.01	22.23	4.96384	101.74		24.5	2.6	90.3		610														81	2833.22			5.1529	5.1529			5.58774	16.6451
2019-12-13_06:00:00	2019-12-13 16:00:01	0	25.28	9.67	0.01	0	0	294.37	-4.89	0.82	21.22	4.95828	99.5192		23.8	3.3	91.5		630														93.5089	2762.34			6.6564	6.6564			2.74988	22.7937
2019-12-13_07:00:00	2019-12-13 17:00:01	0	26.35	9.9	0	0	0	293.32	-4.65	0.34	20.17	4.66241	94.1818	-2.2	23.1	2.7	107.6	26.9	571														146.41	2973.3			8.5849	8.5849			3.85107	15.0421
2019-12-13_08:00:00	2019-12-13 18:00:01	0	26.98	10.1	0	0	0	292.47	-3.95	0.42	19.32	3.97227	96.0693	9.2	22.1	2.4	98	22.8	397														0.81	1842.81			7.7284	18.3184			2.47202	8.34208
2019-12-13_09:00:00	2019-12-13 19:00:01	0	27.43	10.23	0	0	0	291.75	-3.07	0.66	18.6	3.14014	102.133	5.3	21.2	2.4	91.1	22.5	416														24.3049	2180.7			6.76	34.81			0.547812	4.22773
2019-12-13_10:00:00	2019-12-13 20:00:01	0	27.86	10.34	0	0	0	291.24	-1.87	1.08	18.09	2.15947	120.008	13.7	20.7	1.5	101.3	20.1	742														11.2896	1458.32			6.8121	47.7481			0.434897	0.434897
2019-12-13_11:00:00	2019-12-13 21:00:01	0	28.66	10.63	0	0	0	290.82	-0.72	1.53	17.67	1.69095	154.799	18.6	20.4	1.1	109.3	19.1	828														63.5209	1088.87			7.4529	58.2169			0.349218	0.480323
2019-12-13_12:00:00	2019-12-13 22:00:01	0	29.32	10.83	0	0	0.01	290.37	0.31	1.62	17.22	1.64939	190.833	19.9	20.2	0.7	123.5	18.9	1072														82.2649	992.124			8.8804	68.5584			0.901349	1.28733
2019-12-13_13:00:00	2019-12-13 23:00:01	0	29.54	10.85	0.01	0	0.01	290.06	0.43	1.83	16.91	1.87984	193.223	8.2	19.7	0.4	157.3	19.2	1490														7.0225	1864.34			7.7841	82.6281			2.18993	2.18993
2019-12-13_14:00:00	2019-12-14 00:00:01	0	29.71	10.8	0.01	0	0.01	289.86	0.84	1.51	16.71	1.72792	209.087	4.7	19.2	0.1	219.4	22.3	1222														37.21	2183.51			6.2001	95.8441			2.65012	2.74261
2019-12-13_15:00:00	2019-12-14 01:00:01	0	29.74	10.77	0.01	0	0.01	289.75	0.59	1.38	16.6	1.50083	203.148	4.8	18.6	0.5	262.3	20.5	963														35.6409	2176.97			4	110.25			1.00167	2.19978
2019-12-13_16:00:00	2019-12-14 02:00:01	0	29.8	10.75	0.01	0	0.01	289.68	0.6	0.94	16.53	1.11517	212.55	8.8	18.6	0.4	261.5	21.2	792														3.8025	1821.41			4.2849	111.725			0.511465	3.8763
2019-12-13_17:00:00	2019-12-14 03:00:01	0	29.76	10.74	0.01	0	0.01	289.7	0.87	0.73	16.55	1.13569	230.001	4.6	18.3	0.4	290	18.5	468														37.6996	2198.48			3.0625	117.722			0.541245	3.7959
2019-12-13_18:00:00	2019-12-14 04:00:01	0	29.41	10.7	0.01	0	0.01	289.71	0.98	0.44	16.56	1.07424	245.821	5.8	18.1	0.4	260.2	17.3	349														24.01	2091.05			2.3716	121.882			0.454605	4.03912
2019-12-13_19:00:00	2019-12-14 05:00:01	0	28.48	10.76	0.03	0	0.01	289.7	0.57	-0.39	16.55	0.690652	304.38		17.7	0.4	224.3	19.2	293														115.778	2648.96			1.3225	131.102			0.0844785	5.72812
2019-12-13_20:00:00	2019-12-14 06:00:01	0	27.68	11.28	0.08	0	0.01	290.58	0.28	-1.02	17.43	1.05773	344.65	3	16.7	0.6	232.2	22.8	283														68.5584	2299.01			0.5329	133.865			0.20952	3.33525
2019-12-13_21:00:00	2019-12-14 07:00:01	0	23.68	10.16	0.08	0	0	292.53	0.02	-1.75	19.38	1.75011	359.345	4.1	18.7	0.6	216.4	34.1	282														36.7236	2300.93			0.4624	58.0644			1.32276	1.32276
2019-12-13_22:00:00	2019-12-14 08:00:01	0	20.33	9.11	0.06	0	0	294.51	-0.02	-2.33	21.36	2.33009	0.491874	6.4	20.8	0.2	92.3	32.8	300														7.3441	2182.57			0.3136	12.5316			4.53727	4.53727
2019-12-13_23:00:00	2019-12-14 09:00:01	0	16.61	8.04	0.09	0	0	296.6	0.23	-1.54	23.45	1.55708	351.506	37	22.5	0.8	71.9	163.1	433														838.682	838.682			0.9025	0.9025			0.573171	1.26995
2019-12-14_00:00:00	2019-12-14 10:00:01	0	12.73	6.58	0.1	0	0	298.49	0.02	-0.04	25.34	0.0447214	333.435	113.7	24.2	1.4	61.7	208.4	408														11474.7	11474.7			1.2996	14.7456			1.83678	4.15866
2019-12-14_01:00:00	2019-12-14 11:00:01	0	10.27	5.5	0.1	0	0	300.1	-0.23	1.1	26.95	1.12379	168.19	150.2	26.6	1.2	49.2	162.8	245														20938.1	20938.1			0.1225	61.6225			0.00580823	1.34609
2019-12-14_02:00:00	2019-12-14 12:00:01	0	8.71	4.77	0.09	0	0	301.6	-0.2	1.27	28.45	1.28565	171.05	132.8	28.6	1.5	67.7	123.8	338														16391.7	16391.7			0.0225	128.823			0.0459452	0.487691
2019-12-14_03:00:00	2019-12-14 13:00:01	0	7.96	4.71	0.12	0	0	302.89	-0.07	1.06	29.74	1.06231	176.222	112	30.2	0.5	37.1	99.9	331														11511.1	11511.1			0.2116	202.778			0.316191	3.6929
2019-12-14_04:00:00	2019-12-14 14:00:01	0	10.6	7.7	0.33	0	0	303.96	0.02	0.77	30.81	0.77026	181.488	97	31.3	0.7	36.9	136.4	394														7974.49	7974.49			0.2401	269.288			0.00493642	4.05515
2019-12-14_05:00:00	2019-12-14 15:00:01	0	26.75	23.11	1.28	0	0	304.95	0.29	0.54	31.8	0.612944	208.237	111.6	31.8	1.3	92.4	169.4	638														7830.48	7830.48			1.13596e-28	320.41			0.472046	2.46822
2019-12-14_06:00:00	2019-12-14 16:00:01	0	52.73	47.55	2.79	0.01	0	305.72	2.19	2.19	32.57	3.09713	225		29.4	3.8	105.5	88.2	900														2261	2261			10.0489	264.713			0.494029	11.6494
2019-12-14_07:00:00	2019-12-14 17:00:01	0	47.69	40.82	2.27	0.01	0	304.02	-1.71	3.2	30.87	3.62824	151.881	40.6	27.1	3	132.1	56.9	969														0.0484	368.333			14.2129	150.553			0.394681	9.88622
2019-12-14_08:00:00	2019-12-14 18:00:01	0.01	36.03	24.43	0.97	0	0.01	299.56	-4.99	-1.57	26.41	5.23116	72.535	34.7	25.3	3	151	60.3	6154														105.473	105.473			1.2321	36.1201			4.97806	22.5355
2019-12-14_09:00:00	2019-12-14 19:00:01	0.01	24.73	12.25	0.15	0	0.01	296.42	-2.5	2.34	23.27	3.42427	133.106	26.1	23.7	2.1	142.8	46.9	6837														191.823	570.159			0.1849	1.6129			1.75368	4.16269
2019-12-14_10:00:00	2019-12-14 20:00:01	0.02	26.35	12.81	0.12	0	0.01	294.75	-1.81	2.44	21.6	3.03804	143.432	12.3	22.7	2.1	149.1	33.1	4149														0.2601	1377.75			1.21	1.96			0.879923	2.73586
2019-12-14_11:00:00	2019-12-14 21:00:01	0.02	26.61	12.5	0.07	0	0.01	293.61	-1.19	2.01	20.46	2.33585	149.373	11	22	2	150.1	26.4	3106														2.25	1499.86			2.3716	10.4976			0.112796	0.72565
2019-12-14_12:00:00	2019-12-14 22:00:01	0.02	26.37	11.83	0.06	0	0.02	292.46	-0.38	1.92	19.31	1.95724	168.805	10.6	21.3	2.2	157.1	27	2462														1.5129	1583.88			3.9601	25.9081			0.058931	0.453256
2019-12-14_13:00:00	2019-12-14 23:00:01	0.01	26.32	10.91	0.07	0	0.02	291.99	0.63	2.42	18.84	2.50066	194.592	13	20.9	1.8	163.9	27.2	3952														4.3681	1468.27			4.2436	35.5216			0.490924	0.666933
2019-12-14_14:00:00	2019-12-15 00:00:01	0	31.36	11.95	0.07	0	0.02	291.02	0.79	2.23	17.87	2.3658	199.507	15.5	20.5	1.3	172.9	28.6	5040														12.6025	1209.51			6.9169	53.7289			1.13593	1.13593
2019-12-14_15:00:00	2019-12-15 01:00:01	0	35.8	13.21	0.08	0	0.02	289.99	0.92	1.98	16.84	2.1833	204.922	14.8	20.4	1.2	180.9	30.1	1746														2.5281	1170.87			12.6736	71.5716			0.966879	0.966879
2019-12-14_16:00:00	2019-12-15 02:00:01	0	36.05	13.26	0.07	0	0.02	289.15	1.16	1.59	16	1.96817	216.113	11.6	20.1	0.9	187.9	30.9	1453														2.7556	1396.37			16.81	92.16			1.14099	1.14099
2019-12-14_17:00:00	2019-12-15 03:00:01	0	35.14	13.18	0.07	0	0.01	288.53	1.54	1.31	15.38	2.02181	229.614	16.5	19.7	1	208.8	29.8	1477														11.0224	1059.37			18.6624	112.784			1.04409	1.04409
2019-12-14_18:00:00	2019-12-15 04:00:01	0	34.01	12.92	0.07	0	0.01	288.78	1.18	1.11	15.63	1.62003	226.751	15.2	18.5	0.6	249.8	26.7	1358														5.1984	1163.36			8.2369	133.865			1.04046	1.59762
2019-12-14_19:00:00	2019-12-15 05:00:01	0	33.03	12.64	0.06	0	0.01	290.2	1.06	0.92	17.05	1.40357	229.044	17.6	17.1	0.7	207.1	24.4	902														24.6016	1023.23			0.0025	133.402			0.495006	1.9056
2019-12-14_20:00:00	2019-12-15 06:00:01	0	32.6	12.82	0.08	0	0.01	291.07	0.9	0.71	17.92	1.14634	231.73	17	17.5	0.2	94	30	690														17.4724	1050.28			0.1764	105.678			0.895563	4.56958
2019-12-14_21:00:00	2019-12-15 07:00:01	0	30.49	12.1	0.07	0	0.01	292.37	0.43	0.13	19.22	0.449222	253.179	9.9	20	0.4	170.6	34.9	596														4.84	1618.29			0.6084	41.9904			0.00242276	6.94206
2019-12-14_22:00:00	2019-12-15 08:00:01	0	27.16	11.75	0.1	0	0.01	294.11	0.23	-0.76	20.96	0.79404	343.163	9.1	21.9	0.5	87.2	38.2	541														7.0225	1712.14			0.8836	8.0656			0.0864597	4.79592
2019-12-14_23:00:00	2019-12-15 09:00:01	0	25	12.21	0.19	0	0.01	296.35	-0.12	-1.07	23.2	1.07671	6.39904	25.3	22.9	1.3	37.5	80.8	537														171.348	610.98			0.09	0.16			0.0498593	1.2261
2019-12-15_00:00:00	2019-12-15 10:00:01	0	20.99	11.82	0.29	0	0	298.89	-0.74	-0.81	25.74	1.09713	42.4143	52.4	24.8	1.6	57.8	113.6	539														1646.74	1646.74			0.8836	23.4256			0.252876	0.61916
2019-12-15_01:00:00	2019-12-15 11:00:01	0	0.08	0.06	0	0	0	303.11	-1.65	-1.26	29.96	2.07608	52.6335	72.8	27.1	2.5	64	112.2	402														5291.11	5291.11			8.1796	129.05			0.17971	1.19263
2019-12-15_02:00:00	2019-12-15 12:00:01	0	3.64	3.29	0.2	0	0	304.81	-1.43	-2.05	31.66	2.49948	34.8982	65.6	29	2.5	60.9	72.8	520														3882.54	3882.54			7.0756	223.802			2.70456e-07	2.29668
2019-12-15_03:00:00	2019-12-15 13:00:01	0	21.44	19.5	1.18	0	0	306.53	-0.91	-1.76	33.38	1.98134	27.3411	65.7	30.7	2.8	69.3	111	475														2134.44	2134.44			7.1824	337.824			0.670208	1.68309
2019-12-15_04:00:00	2019-12-15 14:00:01	0	26.79	24.36	1.49	0	0	308.01	1.99	0.81	34.86	2.14853	247.852	95.8	32.2	2.1	56.4	130.3	469														5103.67	5103.67			7.0756	456.25			0.00235559	0.584513
2019-12-15_05:00:00	2019-12-15 15:00:01	0	28.7	26.08	1.6	0	0	308.2	3.26	2.48	35.05	4.0961	232.738	104.6	35.4	2.9	265.2	48.5	585														6165.39	6165.39			0.1225	612.563			1.43064	12.3348
2019-12-15_06:00:00	2019-12-15 16:00:01	0	33.67	30.61	1.88	0	0	307.75	2.61	2.24	34.6	3.43943	229.363	64.2	35.1	4.6	256	19.3	559														1128.29	1128.29			0.25	576			1.34692	20.752
2019-12-15_07:00:00	2019-12-15 17:00:01	0	31.72	28.81	1.76	0	0	307.08	2.4	1.61	33.93	2.89	236.145	27.2	34.1	4.6	233.1	16.7	839														2.5921	38.6635			0.0289	498.629			2.9241	16.048
2019-12-15_08:00:00	2019-12-15 18:00:01	0	83.25	75.39	4.59	0.01	0.01	305.07	0.36	0.35	31.92	0.502096	225.807		32.6	1.6	215	50	2891														5683.65	5683.65			0.4624	354.192			1.20539	1.90966
2019-12-15_09:00:00	2019-12-15 19:00:01	0	71.83	64.05	3.82	0.01	0.01	300.33	-2.22	-2.11	27.18	3.06276	46.4554		28.8	1.6	77	56.8	3785														4102.4	4102.4			2.6244	105.678			2.13967	2.13967
2019-12-15_10:00:00	2019-12-15 20:00:01	0	60.52	53	3.1	0.01	0.02	296.27	-0.63	-2.57	23.12	2.64609	13.7737		26.3	1.5	78.3	40.3	3111														2809	2809			10.1124	13.8384			1.31353	1.31353
2019-12-15_11:00:00	2019-12-15 21:00:01	0	127.4	114.81	6.75	0.02	0.02	296.78	1.11	-1.79	23.63	2.10623	328.197	1	24.6	0.5	78	35	2049														12952.7	12952.7			0.9409	6.4009			2.57997	2.57997
2019-12-15_12:00:00	2019-12-15 22:00:01	0	40.54	36.6	2.15	0.01	0	295.19	3.37	-0.08	22.04	3.37095	271.36	9	23	0.3	336.7	33.2	3002														761.76	761.76			0.9216	0.9216			9.43073	9.43073
2019-12-15_13:00:00	2019-12-15 23:00:01	0	13.79	12.42	0.74	0	0	296.36	3.72	0.73	23.21	3.79095	258.898	21.4	20.7	0.6	178.2	35	3436														80.6404	807.014			6.3001	6.3001			10.1822	10.1822
2019-12-15_14:00:00	2019-12-16 00:00:01	0	12.32	11.06	0.66	0	0	295.08	3.56	0.57	21.93	3.60534	260.903	22.8	20.7	0.2	311.6	43.3	1141														137.828	804.743			1.5129	9.4249			11.5964	11.5964
2019-12-15_15:00:00	2019-12-16 01:00:01	0	11.98	10.75	0.64	0	0	293.5	3.25	1.05	20.35	3.41541	252.096	22.9	19.3	0.6	290.3	36.1	225														147.622	816.702			1.1025	36.6025			7.92651	7.92651
2019-12-15_16:00:00	2019-12-16 02:00:01	0	12.26	10.95	0.65	0	0	292.39	3.06	1.22	19.24	3.29424	248.263	23.2	20.3	0.8	299.1	26.1	64														150.062	788.374			1.1236	37.9456			6.22122	6.22122
2019-12-15_17:00:00	2019-12-16 03:00:01	0	13.93	12.36	0.73	0	0	291.06	2.29	1.71	17.91	2.85801	233.25	27.5	17.8	0.4	243.4	34.2	622														229.22	500.327			0.0121	99.8001			6.04179	6.04179
2019-12-15_18:00:00	2019-12-16 04:00:01	0	18.67	15.95	0.92	0	0.01	289.81	0.22	2.99	16.66	2.99808	184.208	32.6	17.2	0.9	127.9	47.6	1475														277.223	277.223			0.2916	140.186			4.40195	4.40195
2019-12-15_19:00:00	2019-12-16 05:00:01	0	23.68	19.86	1.14	0	0.01	289.1	-0.03	3.23	15.95	3.23014	179.468		18.7	1	145.5	63.9	1117														394.42	1795.05			7.5625	122.102			4.97352	4.97352
2019-12-15_20:00:00	2019-12-16 06:00:01	0	21.35	17.53	0.98	0	0.01	293.9	1.43	3.63	20.75	3.90151	201.501	26.1	18.4	1.1	129.3	61.6	1154														73.4449	345.886			5.5225	42.9025			7.84847	7.84847
2019-12-15_21:00:00	2019-12-16 07:00:01	0	14.41	9.39	0.42	0	0	294.33	1.42	4.64	21.18	4.85242	197.016	28.7	19.9	1.7	152.6	57	1278														372.876	582.643			1.6384	21.3444			9.93776	9.93776
2019-12-15_22:00:00	2019-12-16 08:00:01	0	14.23	7.04	0.21	0	0.01	295.45	0.49	4.08	22.3	4.10932	186.848	28.5	20.6	2.1	166.9	56.4	1185														460.532	712.249			2.89	7.84			4.03736	7.42736
2019-12-15_23:00:00	2019-12-16 09:00:01	0	15.38	5.62	0.05	0	0.01	296.94	-0.41	3.69	23.79	3.71271	173.66	31	21.7	2	156.2	65.9	1276														644.144	655.77			4.3681	4.3681			2.93337	4.96714
2019-12-16_00:00:00	2019-12-16 10:00:01	0	14.22	4.79	0.02	0	0	298.28	-1.31	3.49	25.13	3.72776	159.426	41.3	23.3	2.1	135.3	86.8	1194														1332.98	1332.98			3.3489	7.4529			2.6496	5.49321
2019-12-16_01:00:00	2019-12-16 11:00:01	0	12.74	4.31	0.02	0	0	299.17	-1.75	3.52	26.02	3.93102	153.565	42.5	24.3	2.5	125.9	70.9	680														1458.48	1458.48			2.9584	21.3444			2.04781	8.68491
2019-12-16_02:00:00	2019-12-16 12:00:01	0	12.29	4.23	0.03	0	0	299.72	-2.49	3.59	26.57	4.369	145.255	39.9	24.9	2.8	133.6	80.8	530														1272.35	1272.35			2.7889	33.2929			2.46178	13.5793
2019-12-16_03:00:00	2019-12-16 13:00:01	0	11.61	4.09	0.04	0	0.01	299.75	-3.38	3.94	26.6	5.19115	139.375	31.5	25	3.6	116.9	73	834														751.308	751.308			2.56	34.81			2.53175	28.1658
2019-12-16_04:00:00	2019-12-16 14:00:01	0	11.05	3.75	0.04	0	0.01	298.92	-3.94	4.29	25.77	5.82475	137.435	31.7	24.1	3.7	117.4	50	1934														781.202	781.202			2.7889	17.3889			4.51456	36.4906
2019-12-16_05:00:00	2019-12-16 15:00:01	0	12.25	4.22	0.03	0	0	298.03	-4	4.31	24.88	5.88014	137.136	24.3	23.1	4.1	109.3	40.3	1855														403.206	1136.23			3.1684	5.1984			3.16891	42.1999
2019-12-16_06:00:00	2019-12-16 16:00:01	0	16.14	5.55	0.02	0	0	296.92	-3.82	4.41	23.77	5.83442	139.1	17.1	22	3.3	114.9	31.2	1427														133.403	1566.42			3.1329	3.1329			6.4233	31.9273
2019-12-16_07:00:00	2019-12-16 17:00:01	0	21.95	7.54	0.01	0	0	295.7	-3.28	4.61	22.55	5.65778	144.568	15.8	21.4	2.7	125.6	27.9	1460														68.2276	1512.28			1.3225	3.0625			8.74848	23.7538
2019-12-16_08:00:00	2019-12-16 18:00:01	0	22.39	7.64	0	0	0	294.31	-2.85	4.21	21.16	5.08396	145.903	17.6	21	2.6	130.7	27	1577														99.2016	1368.11			0.0256	12.5316			6.17003	17.6396
2019-12-16_09:00:00	2019-12-16 19:00:01	0	25.37	8.6	0	0	0.01	292.3	-1.72	2.26	19.15	2.84007	142.727	16.5	20.3	2.7	137	27.1	1695														62.41	1378.49			1.3225	39.0625			0.0196197	4.22743
2019-12-16_10:00:00	2019-12-16 20:00:01	0	30.89	10.27	0.01	0	0.01	290.02	-1.25	1.83	16.87	2.21617	145.664	7.7	19.8	2.2	157.6	26	1312														6.6049	1958.77			8.5849	81.5409			0.0002614	0.868937
2019-12-16_11:00:00	2019-12-16 21:00:01	0	30.39	9.79	0	0	0.01	288.87	-0.59	1.96	15.72	2.04688	163.247	9.9	19.5	1.7	154.7	21.9	1173														0.0121	1809.48			14.2884	109.83			0.120323	0.120323
2019-12-16_12:00:00	2019-12-16 22:00:01	0	28.12	8.98	0.01	0	0.01	287.97	0.17	2.03	14.82	2.03711	184.787	9.7	19.3	1.6	173.8	18.1															0.5184	1896.43			20.0704	134.096			0.191061	0.191061
2019-12-16_13:00:00	2019-12-16 23:00:01	0	27.59	8.96	0.02	0	0.01	287.17	0.66	1.95	14.02	2.05866	198.699	4.7	18.9	1.5	172	19.7	748														18.1476	2358.85			23.8144	163.328			0.312106	0.312106
2019-12-16_14:00:00	2019-12-17 00:00:01	0	28.33	9.59	0.05	0	0.01	286.45	1.67	1.32	13.3	2.12869	231.676	5.3	18.5	1.2	163.9	19.8	566														18.4041	2240.89			27.04	193.21			0.862456	0.862456
2019-12-16_15:00:00	2019-12-17 01:00:01	0	28.17	10.22	0.11	0	0.01	285.96	2.07	1.11	12.81	2.34883	241.798	2.8	17.6	1	169.9	19	406														55.0564	2421.43			22.9441	233.784			1.81934	1.81934
2019-12-16_16:00:00	2019-12-17 02:00:01	0	29.39	11.51	0.18	0	0	285.58	2.02	1.33	12.43	2.41853	236.638	6.9	15.9	0.4	206.4	17.3	353														21.2521	1920.02			12.0409	301.717			4.07447	4.07447
2019-12-16_17:00:00	2019-12-17 03:00:01	0	31.63	13.28	0.26	0	0	285.26	2.07	1.36	12.11	2.47679	236.695	9.3	14.3	0.5	215.7	18.3	318														15.8404	1571.96			4.7961	372.104			3.90771	3.90771
2019-12-16_18:00:00	2019-12-17 04:00:01	0	33.45	15.13	0.36	0	0	284.98	2.24	1.19	11.83	2.53647	242.021	6.9	12.9	0.4	223	15.8	238														67.7329	1615.88			1.1449	439.741			4.56452	4.56452
2019-12-16_19:00:00	2019-12-17 05:00:01	0	34.51	16.52	0.45	0	0.01	284.61	2.06	1.48	11.46	2.53653	234.305	14.4	12.2	0.5	263.1	16.4	235														4.4944	980.191			0.5476	485.762			4.14747	4.14747
2019-12-16_20:00:00	2019-12-17 06:00:01	0	35.27	17.49	0.5	0	0.01	288.55	0.8	1.31	15.4	1.53496	211.412	12.3	13.4	0.6	293	21.6	150														26.9361	1052.22			4	285.61			0.874149	1.81991
2019-12-16_21:00:00	2019-12-17 07:00:01	0	35.07	16.04	0.38	0	0.01	290.63	0.33	1.39	17.48	1.42864	193.355		17.5	0.8	188	22.5	177														257.282	2133.33			0.0004	114.918			0.395183	1.57594
2019-12-16_22:00:00	2019-12-17 08:00:01	0	31.92	13.92	0.24	0	0	292.33	-0.28	1.44	19.18	1.46697	168.996	-0.8	19.8	1	121.4	21.9	453														216.678	2411.6			0.3844	45.1584			0.218061	1.03435
2019-12-16_23:00:00	2019-12-17 09:00:01	0	28.74	12.59	0.21	0	0.01	294.07	-0.54	1.34	20.92	1.44471	158.051	9.3	21	0.7	71.9	23.6	154														10.8241	1627.15			0.0064	14.2884			0.5546	1.79369
2019-12-17_00:00:00	2019-12-17 10:00:01	0	27.55	11.89	0.19	0	0.01	295.94	-0.65	1.38	22.79	1.52542	154.779	12.3	22.3	1	32.6	31.7	93														0.1681	1446.89			0.2401	0.3721			0.276064	0.918879
2019-12-17_01:00:00	2019-12-17 11:00:01	0	25.71	10.78	0.16	0	0.01	297.79	-0.83	1.51	24.64	1.72308	151.204	14.3	23.6	0.2	74.9	29.7	106														12.3904	1379.97			1.0816	6.4516			2.31977	2.43648
2019-12-17_02:00:00	2019-12-17 12:00:01	0	26.88	10.7	0.13	0	0.01	299.31	-1.47	1.53	26.16	2.12174	136.146	14.9	25.1	0.9	39.9	30.8	366														17.64	1341.61			1.1236	30.9136			1.49266	1.49266
2019-12-17_03:00:00	2019-12-17 13:00:01	0	23.29	9.1	0.09	0	0.01	300.42	-2.82	1.51	27.27	3.19883	118.167	10.3	26.8	1.1	74.9	31	300														1.44	1834.24			0.2209	70.0569			4.40508	4.40508
2019-12-17_04:00:00	2019-12-17 14:00:01	0	19.74	7.75	0.05	0	0	300.42	-4.54	0.98	27.27	4.64457	102.181	12.7	28.3	1.7	118.7	40.6	442														24.5025	1745.4			1.0609	97.4169			8.67047	8.67047
2019-12-17_05:00:00	2019-12-17 15:00:01	0	17.82	6.95	0.03	0	0	299.52	-5.39	0.72	26.37	5.43788	97.6084	6.6	28.1	3.1	126.2	61	555														0.1225	2369.55			2.9929	76.9129			5.46567	25.5417
2019-12-17_06:00:00	2019-12-17 16:00:01	0	15.96	6.26	0.03	0	0	298.76	-5.11	0.47	25.61	5.13157	95.2549	2.1	27.4	3.2	98	26.4	314														17.3056	2901.76			3.2041	53.4361			3.73096	23.4989
2019-12-17_07:00:00	2019-12-17 17:00:01	0	14.28	5.69	0.03	0	0	297.62	-4.63	0.48	24.47	4.65481	95.9187	9.6	26.3	3.1	103.8	23.7	117														15.2881	2203.18			3.3489	25.7049			2.41745	18.2399
2019-12-17_08:00:00	2019-12-17 18:00:01	0	14.52	5.67	0.02	0	0	296	-3.95	0	22.85	3.95	89.9998	9.5	24.7	3	96	24.3	231														14.6689	2214.46			3.4225	3.4225			0.9025	12.0132
2019-12-17_09:00:00	2019-12-17 19:00:01	0	16.24	6.63	0.06	0	0	292.57	-2.35	-0.35	19.42	2.37592	81.529	5.6	22.6	2.3	89.1	20	421														1.0609	2499.8			10.1124	13.5424			0.00576398	1.42068
2019-12-17_10:00:00	2019-12-17 20:00:01	0	16.84	6.41	0.02	0	0	290.27	-2.37	-0.78	17.12	2.49506	71.783	3.3	20.4	1.7	94.2	21.6	594														9.6721	2758.14			10.7584	66.9124			0.632113	0.632113
2019-12-17_11:00:00	2019-12-17 21:00:01	0	17.97	6.96	0.03	0	0	288.36	-1.89	-1.25	15.21	2.26597	56.5204	6.5	18.9	0.8	105.6	19.3	636														0.2116	2378.32			13.6161	134.328			2.14906	2.14906
2019-12-17_12:00:00	2019-12-17 22:00:01	0	20.09	8.57	0.11	0	0	287.13	-0.67	-1.9	13.98	2.01467	19.4244	12.2	16.8	0.3	276.1	17.8	664														13.1769	1718.77			7.9524	222.606			2.9401	2.9401
2019-12-17_13:00:00	2019-12-17 23:00:01	0	24.53	12.35	0.32	0	0.01	286.58	0.97	-2.13	13.43	2.34047	335.516	7	15.3	0.4	255.2	15.6	906														28.6225	1838.52			3.4969	287.981			3.76542	3.76542
2019-12-17_14:00:00	2019-12-18 00:00:01	0	29.5	16.88	0.57	0	0.01	286.41	1.76	-1.66	13.26	2.41934	313.325	4.6	14.3	0.3	224.8	16.4	572														150.798	1660.4			1.0816	329.06			4.4916	4.4916
2019-12-17_15:00:00	2019-12-18 01:00:01	0	30.18	17.68	0.61	0	0.01	286.14	1.74	-1.5	12.99	2.2973	310.764	3.4	13.5	0.2	338.2	15.9	295														203.918	1693.16			0.2601	369.024			4.39868	4.39868
2019-12-17_16:00:00	2019-12-18 02:00:01	0	28.79	16.8	0.57	0	0.01	286.02	1.98	-1.63	12.87	2.56462	309.462	2.8	12.7	0.2	184.9	14.2	244														196	1817.15			0.0289	405.217			5.59145	5.59145
2019-12-17_17:00:00	2019-12-18 03:00:01	0	26.21	14.99	0.48	0	0.01	285.81	1.81	-1.87	12.66	2.6025	315.934	2.8	12.3	0	338.7	11.4	190														148.596	1974.74			0.1296	430.148			6.773	6.773
2019-12-17_18:00:00	2019-12-18 04:00:01	0	23.7	13.32	0.39	0	0.01	285.5	1.92	-1.76	12.35	2.60461	312.51	3.3	11.6	0.2	203.1	13.6	123														100.4	2080.09			0.5625	473.062			5.78216	5.78216
2019-12-17_19:00:00	2019-12-18 05:00:01	0	21.73	12.37	0.36	0	0.01	285.35	1.61	-1.69	12.2	2.33414	316.389	7	11.3	0.3	186.2	13.6	117														28.8369	1836.81			0.81	492.84			4.13772	4.13772
2019-12-17_20:00:00	2019-12-18 06:00:02	0	20.38	11.6	0.33	0	0.01	289.87	0.02	-1.08	16.72	1.08019	358.939	5.6	11.7	0.1	117.5	28.7	113														36	2027.52			25.2004	298.598			0.960763	5.30756
2019-12-17_21:00:00	2019-12-18 07:00:02	0	18.09	9.67	0.21	0	0	292.75	-0.37	-2.15	19.6	2.1816	9.76464		15.9	0.2	36.8	28.2	161														93.5089	2762.34			13.69	104.04			3.92676	3.92676
2019-12-17_22:00:00	2019-12-18 08:00:02	0	15.69	8.36	0.16	0	0	295.1	-0.68	-2.67	21.95	2.75523	14.2885		18.8	0.5	32.2	59.6	214														69.8896	2901.76			9.9225	24.5025			5.08607	5.08607
2019-12-17_23:00:00	2019-12-18 09:00:02	0	14.88	8.36	0.19	0	0	297.35	-0.86	-2.92	24.2	3.04401	16.4109	48.8	21.3	1.3	49.6	141	199														1635.39	1635.39			8.41	8.41			3.04157	3.04157
2019-12-18_00:00:00	2019-12-18 10:00:02	0	14.12	8.43	0.23	0	0	299.59	-1.17	-3.04	26.44	3.25738	21.0502	83	24.7	1.6	59	73.5	290														5560.68	5560.68			3.0276	29.5936			2.7469	2.7469
2019-12-18_01:00:00	2019-12-18 11:00:02	0	12.64	7.72	0.23	0	0	301.67	-1.34	-2.96	28.52	3.24918	24.3565	68.9	27.2	2	85.2	41.7	196														3742.99	3742.99			1.7424	100.4			1.56046	3.11588
2019-12-18_02:00:00	2019-12-18 12:00:02	0	13.38	8.86	0.33	0	0	303.65	-1.41	-2.98	30.5	3.29674	25.3215	48.9	29.4	2.5	73.9	45.2	326														1603.2	1603.2			1.21	201.64			0.634796	5.34877
2019-12-18_03:00:00	2019-12-18 13:00:02	0	17.44	12.84	0.59	0	0	305.26	-1.67	-3.04	32.11	3.4685	28.7819	47.5	30.9	2.7	77.4	65.7	441														1201.32	1201.32			1.4641	299.636			0.590594	7.20655
2019-12-18_04:00:00	2019-12-18 14:00:02	0	19.75	15.28	0.76	0	0	306.45	-2.04	-2.94	33.3	3.57844	34.756	66.4	33.1	3.6	77.9	122.8	489														2613.25	2613.25			0.04	428.49			0.000465031	13.6489
2019-12-18_05:00:00	2019-12-18 15:00:02	0	25.29	19.66	1	0	0.01	306.92	-2.54	-3.09	33.77	3.99996	39.4205	88.9	34.5	3.3	71.1	116.7	1119														4794.18	4794.18			0.5329	509.405			0.489948	14.5616
2019-12-18_06:00:00	2019-12-18 16:00:02	0	26.71	18.88	0.88	0	0.01	306	-3.76	-3.13	32.85	4.89229	50.2245		33	3.9	74.8	70.4	1481														356.454	1879.05			0.0225	406.023			0.984639	28.1779
2019-12-18_07:00:00	2019-12-18 17:00:02	0	21.1	11.65	0.36	0	0.01	303.38	-4.4	-3.34	30.23	5.52409	52.7983		30.4	3.2	80.8	44.5	2906														135.722	2558.13			0.0289	222.905			5.40141	27.4586
2019-12-18_08:00:00	2019-12-18 18:00:02	0	19.21	9.53	0.21	0	0.01	300.57	-3.42	-2.65	27.42	4.32653	52.2297	3.6	28.7	2.6	77.6	34.9	5602														35.1649	2410.61			1.6384	108.576			2.98092	11.851
2019-12-18_09:00:00	2019-12-18 19:00:02	0	20.89	10.5	0.25	0	0.01	297.12	-2.56	-2.26	23.97	3.41485	48.5617	8.6	26.7	1.6	88.3	34.1	1689														3.61	1860.02			7.4529	24.7009			3.29368	3.29368
2019-12-18_10:00:00	2019-12-18 20:00:02	0	32.01	20.08	0.81	0.01	0.02	294.13	-1.12	-2.21	20.98	2.4776	26.8754	2.5	24.5	1	85.5	32.9	811														309.056	1571.96			12.3904	12.3904			2.1833	2.1833
2019-12-18_11:00:00	2019-12-18 21:00:02	0	54.59	41.17	2.04	0.01	0.02	292.62	0.69	-2.18	19.47	2.28659	342.437	99.3	22.2	0.5	181.5	33.6	775														3379.1	6121.81			7.4529	16.2409			3.19191	3.19191
2019-12-18_12:00:00	2019-12-18 22:00:02	0	72.79	59.1	3.05	0.01	0.01	292.39	0.96	-1.63	19.24	1.89169	329.504	107.4	20.8	0.4	170.2	42.6	1359														2332.89	10872.6			2.4336	32.0356			2.22515	2.22515
2019-12-18_13:00:00	2019-12-18 23:00:02	0	66.74	54.4	2.77	0.01	0.01	291.86	0.14	-2.09	18.71	2.09468	356.168	36.8	19.9	0.4	271.9	32.9	2343														309.76	839.377			1.4161	50.2681			2.87195	2.87195
2019-12-18_14:00:00	2019-12-19 00:00:02	0.01	60.32	49.49	2.49	0.01	0	291.45	-0.75	-2.52	18.3	2.62924	16.5741	12.9	19.9	0.5	149.3	33.9	2229														1338.83	1338.83			2.56	56.25			4.53366	4.53366
2019-12-18_15:00:00	2019-12-19 01:00:02	0.01	59.74	50.02	2.51	0.01	0	290.97	-1.07	-2.62	17.82	2.83007	22.215	7.5	19.4	0.1	240.1	31.3	860														1807.95	1807.95			2.4964	71.9104			7.45329	7.45329
2019-12-18_16:00:00	2019-12-19 02:00:02	0.03	65.85	56.68	2.87	0.01	0.01	290.57	-0.64	-2.82	17.42	2.89171	12.7868	8.9	18	0.4	260.8	26.6	577														2282.93	2282.93			0.3364	105.678			6.20863	6.20863
2019-12-18_17:00:00	2019-12-19 03:00:02	0.05	70.36	61.6	3.13	0.01	0.01	290.83	-0.04	-3.05	17.68	3.05026	0.751454	10.3	17	0.1	237.6	44	434														2631.69	2631.69			0.4624	121.44			8.70405	8.70405
2019-12-18_18:00:00	2019-12-19 04:00:02	0.07	71.11	62.63	3.18	0.01	0.01	291.66	0.53	-3.27	18.51	3.31267	350.794	8.6	16.2	0.2	251.5	26.1	366														2919.24	2919.24			5.3361	120.78			9.68873	9.68873
2019-12-18_19:00:00	2019-12-19 05:00:02	0.08	89.38	79.57	3.99	0.01	0.01	291.74	-0.19	-3.36	18.59	3.36537	3.23657	0.7	15.7	0.1	8.1	24.8	390														6220.48	6220.48			8.3521	130.188			10.6626	10.6626
2019-12-18_20:00:00	2019-12-19 06:00:02	0.07	96.1	85.91	4.27	0.01	0.01	296.91	-0.74	-2.56	23.76	2.66481	16.1227	3.2	15.4	0	258.5	49.4	879														6840.94	6840.94			69.8896	69.8896			7.1012	7.1012
2019-12-18_21:00:00	2019-12-19 07:00:02	0.04	87.49	78.14	3.85	0.01	0.01	302.68	-1.1	-2.66	29.53	2.87847	22.4668	4.3	18.3	0.5	99.9	117.5	719														5452.35	5452.35			126.113	126.113			5.65713	5.65713
2019-12-18_22:00:00	2019-12-19 08:00:02	0.01	68.06	60.51	2.96	0.01	0.01	306.49	0.16	-2.49	33.34	2.49514	356.323	7	21.5	0.8	58.2	57.7	761														2863.32	2863.32			140.186	140.186			2.87348	2.87348
2019-12-18_23:00:00	2019-12-19 09:00:02	0.01	45.02	39.66	1.91	0.01	0.01	310.2	1.58	-1.36	37.05	2.08471	310.721	11.3	24.1	1.2	49.5	70.2	603														804.29	804.29			167.703	238.703			0.782705	0.782705
2019-12-19_00:00:00	2019-12-19 10:00:02	0.01	26.66	23.3	1.06	0	0	312.55	2.88	0.53	39.4	2.92836	259.573	45.8	28.2	1.2	32.9	162.4	571														506.25	506.25			125.44	479.61			2.98723	2.98723
2019-12-19_01:00:00	2019-12-19 11:00:02	0.02	24	20.76	0.96	0	0	313.6	3.38	1.92	40.45	3.88726	240.401	89	33.4	1	25.7	203.7	480														4656.7	4656.7			49.7025	792.423			8.33628	8.33628
2019-12-19_02:00:00	2019-12-19 12:00:02	0.12	29.17	24.92	1.24	0	0	314.2	3	2.76	41.05	4.07647	227.386	130.3	39.3	2.2	1.9	216.3	906														11104.9	11104.9			3.0625	1200.62			3.52114	7.79788
2019-12-19_03:00:00	2019-12-19 13:00:02	0.32	34.25	28.43	1.42	0	0	314.59	1.74	2.06	41.44	2.69652	220.186	170.5	40.3	2.4	12.8	261.7	766														20183.9	20183.9			1.2996	1298.88			0.0879219	2.60021
2019-12-19_04:00:00	2019-12-19 14:00:02	0.53	49.12	40.94	2.19	0	0	315.06	1.67	2.19	41.91	2.75409	217.328	169	40.4	2	54.7	200.8	740														16399.4	21818.8			2.2801	1340.29			0.568649	1.61312
2019-12-19_05:00:00	2019-12-19 15:00:02	0.93	55.49	44.82	2.45	0.01	0	315.21	2.33	2.94	42.06	3.75133	218.397	138.2	40.9	1.6	55.5	156.7	1086														8719.82	14590.7			1.3456	1388.31			4.62823	4.62823
2019-12-19_06:00:00	2019-12-19 16:00:02	0.84	76.74	64.53	3.68	0.01	0	314.82	2.75	3.15	41.67	4.18151	221.121	122.8	34.6	5.2	150.3	400.7	1576														3395.39	15650.5			49.9849	934.525			1.03733	34.7806
2019-12-19_07:00:00	2019-12-19 17:00:02	0.71	73.84	62.4	3.56	0.01	0	313.93	3.1	2.83	40.78	4.19749	227.607	94.8	29.1	4	171.4	72.1	1582														1049.76	9019.68			136.422	584.672			0.0390013	22.217
2019-12-19_08:00:00	2019-12-19 18:00:02	0.45	96.68	83.59	4.82	0.01	0.01	311.54	-0.22	4.07	38.39	4.07594	176.906	39.2	28.2	2.8	168.6	18.4	2857														1970.47	3667.76			103.836	436.392			1.62803	11.5053
2019-12-19_09:00:00	2019-12-19 19:00:02	0.02	38.31	27.05	0.94	0.01	0.02	300.28	-0.38	4.25	27.13	4.26695	174.891	17.3	26.8	2.1	172.5	13.3	6607														95.0625	319.623			0.1089	67.7329			4.69569	8.31143
2019-12-19_10:00:00	2019-12-19 20:00:02	0.02	30.66	20.07	0.65	0	0.01	298.57	1.16	3.48	25.42	3.66824	198.435	8.4	25.4	2	186.8	6.1	7148														136.189	1139.6			0.0004	26.2144			2.78303	4.77091
2019-12-19_11:00:00	2019-12-19 21:00:02	0.06	29.32	18.62	0.62	0	0.01	297.09	0.98	3.14	23.94	3.28938	197.333	9.4	23.4	1.8	214.1	15.5	8470														85.0084	1170.19			0.2916	2.6896			2.21824	2.57723
2019-12-19_12:00:00	2019-12-19 22:00:02	0.14	40.32	28.35	1.21	0	0.01	294.97	1.11	2.31	21.82	2.56285	205.665	7.7	22.3	2	215.9	18.1	9384														426.423	685.288			0.2304	2.4964			0.3168	1.16392
2019-12-19_13:00:00	2019-12-19 23:00:02	0.23	54.52	41.2	1.95	0.01	0.01	294.33	1.13	2.49	21.18	2.73441	204.409	7.2	20.6	1.3	215.5	14.2	7893														1156	1156			0.3364	15.3664			2.05753	2.05753
2019-12-19_14:00:00	2019-12-20 00:00:02	0.31	70.49	56.5	2.82	0.01	0.01	293.12	1.22	2.36	19.97	2.65669	207.337	6.2	18.3	0.2	263.2	10.9	6407														2530.09	2530.09			2.7889	55.2049			6.03532	6.03532
2019-12-19_15:00:00	2019-12-20 01:00:02	0.35	81.97	67.89	3.46	0.01	0.01	292.64	1.29	2.51	19.49	2.82209	207.201	7.2	16.3	0.1	138.6	11	5065														3683.28	3683.28			10.1761	98.2081			7.40978	7.40978
2019-12-19_16:00:00	2019-12-20 02:00:02	0.35	79.64	65.69	3.3	0.01	0.01	292.12	1.13	2.65	18.97	2.88087	203.094	7.9	14.9	0.6	232.1	9.4	783														3339.68	3339.68			16.5649	139.949			5.20236	5.20236
2019-12-19_17:00:00	2019-12-20 03:00:02	0.34	76.49	63.11	3.16	0.01	0.01	290.87	1.53	1.97	17.72	2.49435	217.835	4.7	14	0.6	264.6	11.4	451														3411.73	3411.73			13.8384	195.44			3.58858	3.58858
2019-12-19_18:00:00	2019-12-20 04:00:02	0.34	76.72	63.59	3.2	0.01	0.01	290.42	1.44	1.39	17.27	2.00142	226.012	4.7	13.5	0.7	261.1	22.9	305														3468.03	3468.03			14.2129	222.905			1.69371	1.69371
2019-12-19_19:00:00	2019-12-20 05:00:02	0.32	75.89	62.49	3.11	0.01	0.01	290.38	0.26	1.06	17.23	1.09142	193.782	10.3	13.9	0.7	297.2	26.9	108														2723.8	2723.8			11.0889	212.285			0.15321	2.86482
2019-12-19_20:00:00	2019-12-20 06:00:02	0.29	71.55	57.77	2.79	0.01	0.02	293.56	-0.57	0.41	20.41	0.70214	125.727	13.7	14.4	0.7	286.2	37.4	284														1942.16	1942.16			36.1201	118.592			4.57783e-06	4.33414
2019-12-19_21:00:00	2019-12-20 07:00:02	0.22	54.28	42.08	1.91	0.01	0.01	295.63	-0.53	1.07	22.48	1.19407	153.649		18.2	0.8	301.7	65.2	251														1770.73	1770.73			18.3184	25.2004			0.15529	2.2199
2019-12-19_22:00:00	2019-12-20 08:00:02	0.19	42.05	31.3	1.32	0.01	0.01	297.52	-0.92	0.08	24.37	0.923472	94.9696		19.9	0.6	317.9	54.2	218														979.69	979.69			19.9809	19.9809			0.104634	3.84367
2019-12-19_23:00:00	2019-12-20 09:00:02	0.19	34.93	25.13	0.99	0	0.01	299.71	-1.28	-0.08	26.56	1.2825	86.4238		21	0.9	351.6	34.2	189														631.517	1376.26			30.9136	30.9136			0.146304	1.69391
2019-12-20_00:00:00	2019-12-20 10:00:02	0.19	33.08	23.62	0.9	0	0.01	302.1	-1.36	-0.17	28.95	1.37058	82.8751	0.4	23.2	0.4	353.3	34.7	226														539.168	1459.85			33.0625	41.6025			0.942033	2.9358
2019-12-20_01:00:00	2019-12-20 11:00:02	0.19	32.41	22.78	0.84	0	0.01	304.44	-2.01	0.01	31.29	2.01002	90.2849	19.3	25.5	0.9	19.1	40	288														12.1104	405.942			33.5241	122.988			1.23216	1.23216
2019-12-20_02:00:00	2019-12-20 12:00:02	0.22	32.93	22.6	0.82	0	0.01	306.44	-3.06	0.65	33.29	3.12827	101.992	24.3	27.6	0.6	54.2	40.8	223														2.89	234.948			32.3761	230.736			6.39217	6.39217
2019-12-20_03:00:00	2019-12-20 13:00:02	0.18	28.49	17.25	0.44	0	0.01	306.34	-4.49	0.7	33.19	4.54424	98.8611	13.9	29.4	1.3	15.7	36	508														11.2225	965.842			14.3641	285.272			10.5251	10.5251
2019-12-20_04:00:00	2019-12-20 14:00:02	0.15	25.18	14.04	0.23	0	0	305.07	-5.13	0.77	31.92	5.18747	98.5361	10.8	30.8	1.1	72		1313														10.4976	1397.86			1.2544	289.68			16.7074	16.7074
2019-12-20_05:00:00	2019-12-20 15:00:02	0.18	24.72	13.86	0.24	0	0	304.13	-4.79	0.48	30.98	4.81399	95.7223	8.6	30.7	3.4	77.6		1889														27.6676	1581.49			0.0784	255.36			1.99937	22.3728
2019-12-20_06:00:00	2019-12-20 16:00:02	0.22	25.32	14.39	0.26	0	0	303.54	-4.35	-0.13	30.39	4.35194	88.2884	4.4	29.2	3.6	84.2	41.2	2485														99.8001	1886.86			1.4161	192.932			0.565417	19.9625
2019-12-20_07:00:00	2019-12-20 17:00:02	0.22	25.58	14.53	0.25	0	0	302.33	-3.92	-0.48	29.18	3.94928	83.0191	4.6	27.5	3.1	87.9	38.9	815														98.6049	1857.44			2.8224	120.56			0.721274	12.7112
2019-12-20_08:00:00	2019-12-20 18:00:02	0.19	25.56	14.41	0.22	0	0	300.21	-3.69	-1.1	27.06	3.85047	73.4007	9.9	25.7	2.9	96.3	38.9	499														20.3401	1437.77			1.8496	49.8436			0.903388	10.6698
2019-12-20_09:00:00	2019-12-20 19:00:02	0.16	26.78	14.91	0.21	0	0	297.13	-2.74	-1.05	23.98	2.9343	69.0327	4.3	23.9	2.3	89.3	42	736														112.572	1850.55			0.0064	4.7524			0.402333	3.06354
2019-12-20_10:00:00	2019-12-20 20:00:02	0.13	28.31	15.48	0.17	0	0	295.26	-2.2	-0.88	22.11	2.36947	68.1987	4.4	22.4	1.8	79	38	1111														122.766	1793.35			0.0841	1.4161			0.324299	0.469873
2019-12-20_11:00:00	2019-12-20 21:00:02	0.12	29.72	16.08	0.16	0	0.01	293.43	-1.99	-0.49	20.28	2.04944	76.1673	7.2	21.3	1.3	71.7	38.5	839														78.8544	1516.95			1.0404	16.9744			0.561659	0.561659
2019-12-20_12:00:00	2019-12-20 22:00:02	0.12	31.31	17.04	0.18	0	0.01	291.44	-1.33	-0.34	18.29	1.37277	75.6602	4.4	20.5	0.9	59.3	32.6	622														159.77	1663.66			4.8841	47.7481			0.223512	1.46708
2019-12-20_13:00:00	2019-12-20 23:00:02	0.12	32.66	18.05	0.2	0	0.01	290.62	-0.97	-0.49	17.47	1.08674	63.1993	8	19.4	0.3	20.3	26.4	549														101.003	1308.85			3.7249	77.9689			0.618957	4.39851
2019-12-20_14:00:00	2019-12-21 00:00:02	0.12	34.53	19.64	0.26	0	0.01	290.12	-0.34	-1.56	16.97	1.59662	12.2954	8.5	17.7	0.4	83.6	25.2	322														124.1	1161.99			0.5329	121.661			1.4319	2.2123
2019-12-20_15:00:00	2019-12-21 01:00:02	0.14	36.37	21.92	0.38	0	0.01	290.32	1.69	-1.53	17.17	2.27969	312.155	8.3	16.4	0.1	310.9	21	297														185.504	1024.51			0.5929	147.137			4.75106	4.75106
2019-12-20_16:00:00	2019-12-21 02:00:02	0.16	37.3	23.43	0.48	0	0.01	290.1	0.09	-1.44	16.95	1.44281	356.424	7.7	15.9	0.3	232.6	19.2	226														247.433	967.086			1.1025	165.122			1.30601	3.03174
2019-12-20_17:00:00	2019-12-21 03:00:02	0.16	39.25	24.94	0.51	0	0.01	289.72	-1.3	-1.13	16.57	1.72247	49.0019	4	15.1	0.4	238.8	18.3	266														438.484	1108.09			2.1609	196.841			1.74892	1.85377
2019-12-20_18:00:00	2019-12-21 04:00:02	0.14	41.76	26.67	0.51	0	0.01	291.06	-1.7	-1.89	17.91	2.54207	41.9706	5.3	14.8	0.1	310.7	14.2	281														456.677	915.547			9.6721	168.74			5.96369	5.96369
2019-12-20_19:00:00	2019-12-21 05:00:02	0.15	45.02	29.34	0.6	0	0.01	290.36	-1.23	-2.37	17.21	2.67017	27.4288	4.2	14.5	0.1	102.6	3.3	278														632.02	823.001			7.3441	195.72			6.60577	6.60577
2019-12-20_20:00:00	2019-12-21 06:00:02	0.16	48.16	32.01	0.71	0	0.01	292.37	-1.65	-1.57	19.22	2.27759	46.4233	4.5	14.6	0.3	203.8	22.8	282														756.8	756.8			21.3444	141.134			3.91085	3.91085
2019-12-20_21:00:00	2019-12-21 07:00:02	0.17	50.42	33.82	0.79	0.01	0.02	293.58	-0.82	-0.28	20.43	0.866487	71.147		17.7	0.3	314.5	24.6	264														1143.79	1143.79			7.4529	57.3049			0.320908	5.37087
2019-12-20_22:00:00	2019-12-21 08:00:02	0.22	52.13	36.14	0.97	0.01	0.01	297.69	-0.62	-2.46	24.54	2.53693	14.1459	3	20.9	0.8	351.7	51.5	343														1098.26	1098.26			13.2496	13.2496			3.01692	3.01692
2019-12-20_23:00:00	2019-12-21 09:00:02	0.48	56.33	39.43	1.26	0.01	0.01	302.15	-0.99	-3.06	29	3.21616	17.928	20	23.2	0.8	354.9	56.2	294														377.525	377.525			33.64	42.25			5.83784	5.83784
2019-12-21_00:00:00	2019-12-21 10:00:02	1.04	62.53	42.73	1.52	0.01	0.01	305.6	0.22	-2.6	32.45	2.60929	355.163	22.6	26.1	1.1	54.3	70.9	310														405.217	405.217			40.3225	165.123			2.27796	2.27796
2019-12-21_01:00:00	2019-12-21 11:00:02	4.58	71.71	37.43	1.25	0	0.01	312	-1.94	0.21	38.85	1.95133	96.1779	38.2	29.4	0.8	91.9	94.7	298														0.5929	179.614			89.3025	508.503			1.32557	1.32557
2019-12-21_02:00:00	2019-12-21 12:00:02	7.34	82.75	38.41	1.29	0	0.01	314.83	-0.99	0.97	41.68	1.386	134.415	52.4	32.4	1.4	55.1	126.3	352														195.72	816.931			86.1184	805.424			0.00019596	0.487202
2019-12-21_03:00:00	2019-12-21 13:00:02	9.42	123.62	66.79	2.99	0.01	0.01	315.03	1.72	0.31	41.88	1.74771	259.783	80.6	34.5	1.6	61.2	176	323														190.716	7252.57			54.4644	941.262			0.0218191	0.0218191
2019-12-21_04:00:00	2019-12-21 14:00:02	12.22	177.79	104.52	5.19	0.01	0.01	313.68	1.66	2.13	40.53	2.70046	217.931	124.7	36.3	1.5	48.6	226	340														407.232	27886.3			17.8929	969.077			1.44111	1.44111
2019-12-21_05:00:00	2019-12-21 15:00:02	11.8	149.99	80.26	3.64	0.01	0.01	313.63	-0.8	1.2	40.48	1.44222	146.31	149.1	36.1	0.8	326.2	234.7	477														4738.95	27933.1			19.1844	953.574			0.412447	1.54202
2019-12-21_06:00:00	2019-12-21 16:00:02	11.18	138.1	71.2	3.03	0.01	0.01	312.97	1.35	1.37	39.82	1.92338	224.579	154.8	33.8	0.7	272.2	228.9	636														6988.96	26821.3			36.2404	779.526			1.49666	1.49666
2019-12-21_07:00:00	2019-12-21 17:00:02	4.25	79.98	41.14	1.3	0.01	0.02	306.71	-3.81	2.4	33.56	4.5029	122.208	141.5	32.3	0.5	214.9	232.6	1032														10072.1	14499			1.5876	406.426			16.0232	16.0232
2019-12-21_08:00:00	2019-12-21 18:00:02	5.3	88.49	42.57	1.34	0.01	0.02	305.02	-1.87	-2.04	31.87	2.7674	42.5106	124.7	28.7	4.8	143.3	269.3	928														6745.34	11033.8			10.0489	221.117			4.13146	16.6742
2019-12-21_09:00:00	2019-12-21 19:00:02	5.76	140.33	90.98	4.26	0.01	0.02	301.99	0.15	-2.79	28.84	2.79403	356.923	89.3	24.4	4	149.1	120	1358														2.8224	13936.3			19.7136	56.8516			1.45437	10.9563
2019-12-21_10:00:00	2019-12-21 20:00:02	7.15	208.52	148.09	7.61	0.02	0.02	300.29	1.19	-2.12	27.14	2.43115	330.694	54.9	22.5	2.9	151.9	73.9	2036														8684.38	19813.9			21.5296	21.5296			0.219818	3.41197
2019-12-21_11:00:00	2019-12-21 21:00:02	7.88	213.85	149.9	7.54	0.02	0.02	299.79	1.41	-1.19	26.64	1.84505	310.163	37.3	21.7	2.3	153.7	47.2	2815														12678.8	15618			24.4036	24.4036			0.206982	0.436984
2019-12-21_12:00:00	2019-12-21 22:00:02	4.62	101.99	53.09	1.83	0.01	0.03	298.44	-2.65	0.34	25.29	2.67172	97.3111	31.9	21.5	2.3	162.3	34	3839														449.016	518.109			14.3641	14.3641			0.138177	2.21332
2019-12-21_13:00:00	2019-12-21 23:00:02	4.14	106.64	58.09	2.03	0.01	0.03	297.09	1.45	2.3	23.94	2.71892	212.229	24.2	20.8	2.4	170.1	36.7	5327														1148.53	1148.53			9.8596	9.8596			0.101707	2.67295
2019-12-21_14:00:00	2019-12-22 00:00:02	6.04	144.4	85.12	3.45	0.01	0.02	296.14	1.58	1.95	22.99	2.50976	219.016	10.7	20.3	2	171.2	40.7	5710														5538.34	5538.34			7.2361	7.2361			0.259856	1.05219
2019-12-21_15:00:00	2019-12-22 01:00:02	6.84	136.64	75.11	2.84	0.01	0.02	295.92	-0.7	-1.57	22.77	1.71898	24.0303	9.3	19.6	2.5	180.1	41.9	5082														4330.96	4330.96			10.0489	11.0889			0.609989	0.609989
2019-12-21_16:00:00	2019-12-22 02:00:02	6.82	134.39	74.12	2.8	0.01	0.01	295.68	2.58	-0.91	22.53	2.73578	289.428	12.9	19.3	2.3	176.6	37.6	4974														3747.89	3747.89			10.4329	14.9769			0.189905	2.40803
2019-12-21_17:00:00	2019-12-22 03:00:02	6.91	117.38	58.39	1.9	0.01	0.01	296.86	1.42	-3.94	23.71	4.18808	340.181	13.3	19.1	1.6	170.4	41.4	3417														2033.11	2033.11			21.2521	21.2521			6.69815	6.69815
2019-12-21_18:00:00	2019-12-22 04:00:02	6.89	109.95	51.9	1.53	0	0.01	296.7	1.26	-4.65	23.55	4.81769	344.839	12.5	18.7	1.4	163.9	38.1	1768														1552.36	1552.36			23.5225	23.5225			11.6806	11.6806
2019-12-21_19:00:00	2019-12-22 05:00:02	0	176.57	153.13	7.81	0.02	0.01	292.02	2.14	2.88	18.87	3.58804	216.614	13.7	18.1	1.2	167.5	39.9	808														19440.7	19440.7			0.5929	76.2129			5.70271	5.70271
2019-12-21_20:00:00	2019-12-22 06:00:02	0	110.35	91.89	4.57	0.01	0.01	293.27	2.1	4.18	20.12	4.67786	206.675	11	18.1	1.9	171.8	46	409														6543.19	6543.19			4.0804	55.9504			7.71652	9.57199
2019-12-21_21:00:00	2019-12-22 07:00:02	0	69.37	55.2	2.67	0.01	0.01	293.81	1.6	4.38	20.66	4.66309	200.067	11.2	18.8	2.4	167.7	45.1	214														1936	1936			3.4596	38.9376			5.12157	12.8099
2019-12-21_22:00:00	2019-12-22 08:00:02	0	47.18	35.15	1.62	0	0.01	294.69	1.13	3.58	21.54	3.7541	197.518	17.1	19.4	2.4	164.7	48.6	170														325.802	325.802			4.5796	22.6576			1.8336	7.12946
2019-12-21_23:00:00	2019-12-22 09:00:02	0	34.89	23.84	1.03	0	0.01	296.11	0.4	2.89	22.96	2.91755	187.88	16.5	19.2	3.1	168.9	41.2	178														53.8756	479.085			14.1376	14.1376			0.0332879	6.41888
2019-12-22_00:00:00	2019-12-22 10:00:02	0	24.14	13.5	0.46	0	0.01	297.94	-0.63	2.53	24.79	2.60726	166.017	16.1	18.7	2.5	174.2	38.8	213														6.76	1064.59			37.0881	37.0881			0.0115045	2.63497
2019-12-22_01:00:00	2019-12-22 11:00:02	0	20.8	10.2	0.28	0	0.01	298.93	-1.72	2.67	25.78	3.17605	147.21	13.2	19	2.3	177.3	40.2	144														9	1507.61			45.9684	45.9684			0.767465	3.96827
2019-12-22_02:00:00	2019-12-22 12:00:02	0	20.05	9.95	0.26	0	0.01	299.99	-2.77	2.19	26.84	3.53115	128.33	11.6	19.8	2.1	187.6	39.6	163														2.7225	1654.7			49.5616	49.5616			2.04818	4.61024
2019-12-22_03:00:00	2019-12-22 13:00:02	0	20.53	10.94	0.31	0	0.01	301.15	-3.03	2.23	28	3.76215	126.352	11.8	20.4	1.7	158.7	36.5	128														0.7396	1559.3			57.76	57.76			4.25248	4.25248
2019-12-22_04:00:00	2019-12-22 14:00:02	0	20.17	10.73	0.29	0	0.01	301.66	-3.54	3.02	28.51	4.65317	130.468	18.3	21.6	2	120.9	35.2	191														57.3049	1102.11			47.7481	47.7481			7.03932	10.0436
2019-12-22_05:00:00	2019-12-22 15:00:02	0	19.99	10.39	0.26	0	0.01	301.14	-3.86	3.23	27.99	5.03314	129.922	24.1	21.6	2.8	124.2	35.4	221														187.964	769.397			40.8321	40.8321			4.98692	18.915
2019-12-22_06:00:00	2019-12-22 16:00:02	0	19.53	9.94	0.23	0	0.01	300.13	-4.03	2.96	26.98	5.00025	126.297	26.4	20.6	2.9	124.3	37.7	264														270.932	670.189			40.7044	40.7044			4.41105	19.5033
2019-12-22_07:00:00	2019-12-22 17:00:02	0	17.32	8.21	0.16	0	0.01	298.72	-3.93	3.06	25.57	4.98081	127.905	15.6	19.9	2.8	139.1	43.6	379														54.6121	1475.94			32.1489	32.1489			4.75595	18.4626
2019-12-22_08:00:00	2019-12-22 18:00:02	0	15.2	6.57	0.09	0	0.01	297.02	-3.63	2.88	23.87	4.63371	128.428	15.8	19.7	2.6	153.8	46.2	283														85.1929	1588.66			17.3889	17.3889			4.13599	14.0604
2019-12-22_09:00:00	2019-12-22 19:00:02	0	14.44	5.46	0.04	0	0.01	294.48	-2.21	1.59	21.33	2.72254	125.733	18.3	19.1	1.9	143.7	47.1	238														164.866	1479.79			4.9729	27.7729			0.676565	1.29626
2019-12-22_10:00:00	2019-12-22 20:00:02	0	14.78	4.98	0.01	0	0.01	291.86	-1.92	1.37	18.71	2.35866	125.509	15.9	18.1	1.3	155	47.4	239														119.246	1709.66			0.3721	79.0321			1.12077	1.12077
2019-12-22_11:00:00	2019-12-22 21:00:02	0	16.17	5.36	0	0	0.01	290.78	-1.09	1.97	17.63	2.25144	151.044	19	17.5	1.2	156.6	46.1	288														186.05	1433.99			0.0169	111.725			1.10553	1.10553
2019-12-22_12:00:00	2019-12-22 22:00:02	0	18.22	6.2	0	0	0.02	290.3	-0.05	2.28	17.15	2.28055	178.744	18.2	17	0.9	197.1	39.8	342														144	1430.96			0.0225	133.402			1.90591	1.90591
2019-12-22_13:00:00	2019-12-22 23:00:02	0	19.8	6.92	0	0	0.01	289.36	1.26	1.69	16.21	2.10801	216.707	16.2	16.4	1.5	227	40.2	323														86.1184	1529.44			0.0361	171.348			0.369674	0.369674
2019-12-22_14:00:00	2019-12-23 00:00:02	0	20.02	7.1	0	0	0.01	289.19	1.66	1.64	16.04	2.3335	225.347	13.3	16.8	1	208.1	38.1	329														38.44	1749.58			0.5776	165.38			1.77821	1.77821
2019-12-22_15:00:00	2019-12-23 01:00:02	0	19.3	6.98	0	0	0.01	289	1.9	1.97	15.85	2.73695	223.964	15.2	16.9	1.4	201.8	38.6	387														67.5684	1603.84			1.1025	167.702			1.78744	1.78744
2019-12-22_16:00:00	2019-12-23 02:00:02	0	18.42	6.76	0	0	0.01	288.62	1.88	1.77	15.47	2.58211	226.726	14.7	16.3	1.9	207.4	33.7	450														63.0436	1662.03			0.6889	194.045			0.465276	0.996227
2019-12-22_17:00:00	2019-12-23 03:00:02	0	17.78	6.59	0.01	0	0.01	288.12	1.87	1.59	14.97	2.45459	229.627	14	16.1	0.9	242.5	33.8	521														54.9081	1733.72			1.2769	214.037			2.41674	2.41674
2019-12-22_18:00:00	2019-12-23 04:00:02	0	17.27	6.5	0.02	0	0.01	287.91	1.83	1.73	14.76	2.51829	226.609	15.5	16.1	0.7	190.4	34.9	469														81	1618.29			1.7956	220.226			3.30619	3.30619
2019-12-22_19:00:00	2019-12-23 05:00:02	0	16.67	6.49	0.03	0	0	287.25	1.88	1.49	14.1	2.39885	231.601	16.3	15.8	0.2	238	32.9	467														96.2361	1555.36			2.89	249.64			4.83496	4.83496
2019-12-22_20:00:00	2019-12-23 06:00:02	0	16.58	6.54	0.03	0	0	290.45	1.33	1.77	17.3	2.214	216.922	18.1	15.9	0.2	147.7	42.9	443														133.634	1412.86			1.96	156.25			4.0562	4.0562
2019-12-22_21:00:00	2019-12-23 07:00:02	0	17.69	6.7	0.03	0	0.01	291.97	0.7	2.04	18.82	2.15676	198.939	16.2	17.2	0.8	233.3	47.8	447														90.25	1546.69			2.6244	93.7024			1.84079	1.84079
2019-12-22_22:00:00	2019-12-23 08:00:02	0	18.58	7.19	0.03	0	0.01	293.75	0.17	1.46	20.6	1.46986	186.641	19.3	18.1	0.8	188.3	44.3	457														146.652	1277.2			6.25	49			0.448718	1.47413
2019-12-22_23:00:00	2019-12-23 09:00:02	0	18.68	8.15	0.08	0	0.01	295.74	-0.27	0.77	22.59	0.815966	160.677	16.6	18.8	0.8	210.4	47.2	406														71.4025	1404.6			14.3641	18.5761			0.000254903	3.48955
2019-12-23_00:00:00	2019-12-23 10:00:02	0	20.13	9.71	0.15	0	0.01	297.96	-0.87	0.13	24.81	0.879659	98.4984	17.4	19.7	0.4	2.1	51.8	416														59.1361	1233.27			26.1121	26.1121			0.230073	4.85912
2019-12-23_01:00:00	2019-12-23 11:00:02	0	22.06	11.28	0.2	0	0.01	300.12	-1.15	-0.27	26.97	1.18127	76.7874	20.2	20.6	0.8	52.2	45.2	318														79.5664	945.44			40.5769	40.5769			0.145367	2.2582
2019-12-23_02:00:00	2019-12-23 12:00:02	0	23.98	11.68	0.18	0	0.01	302.12	-1.98	0.13	28.97	1.98426	93.7563	17	21.4	1.5	34.1	41.4	391														28.3024	1125.47			57.3049	57.3049			0.234511	0.234511
2019-12-23_03:00:00	2019-12-23 13:00:02	0	25.53	12.36	0.17	0	0	303.35	-3.35	0.46	30.2	3.38143	97.8184	14.8	22.4	1.5	25.6	38.2	375														5.9536	1229.76			60.84	60.84			3.5398	3.5398
2019-12-23_04:00:00	2019-12-23 14:00:02	0	24.98	12.3	0.16	0	0	303.29	-4.82	0.54	30.14	4.85015	96.3922	12.6	23.7	1.7	42.5	40	376														0.09	1393.38			41.4736	66.2596			9.92347	9.92347
2019-12-23_05:00:00	2019-12-23 15:00:02	0	21.95	12	0.2	0	0	302.63	-5.28	0.47	29.48	5.30088	95.0866	13.7	24.3	2.8	58	38.6	425														2.89	1334.29			26.8324	65.2864			6.25439	21.3156
2019-12-23_06:00:00	2019-12-23 16:00:02	0	21.44	12.22	0.22	0	0	301.64	-5.33	-0.11	28.49	5.33113	88.8179	13	25	3	55.4	31.9	613														0.6084	1369.59			12.1801	60.6841			5.43419	23.4947
2019-12-23_07:00:00	2019-12-23 17:00:02	0	22.75	12.59	0.21	0	0	300	-5.02	-0.94	26.85	5.10725	79.3943	11	25.1	3.1	57.4	27.9	586														2.5281	1492.9			3.0625	39.0625			4.02905	22.3091
2019-12-23_08:00:00	2019-12-23 18:00:02	0	24.49	12.53	0.16	0	0	298.11	-4.48	-1.17	24.96	4.63026	75.3636	12	24.5	3.3	68.7	32.9	813														0.2809	1421.14			0.2116	14.1376			1.76959	19.7692
2019-12-23_09:00:00	2019-12-23 19:00:02	0	25.17	12.3	0.14	0	0	296.13	-2.44	0.01	22.98	2.44002	90.2347	6.9	23.1	3	81.6	30.3	1007														29.16	1851.41			0.0144	0.1444			0.313577	3.82602
2019-12-23_10:00:00	2019-12-23 20:00:02	0	25.59	11.87	0.11	0	0	294.21	-2.13	0.58	21.06	2.20756	105.232	5.3	21.6	2	80	27.9	785														43.1649	2030.22			0.2916	9.2416			0.0430792	0.523532
2019-12-23_11:00:00	2019-12-23 21:00:02	0	26.11	11.54	0.09	0	0	294.29	-1.72	0.48	21.14	1.78572	105.593	15.4	20.9	1.3	74.5	23.2	446														14.8996	1245.24			0.0576	13.3956			0.235925	0.235925
2019-12-23_12:00:00	2019-12-23 22:00:02	0	27.38	11.59	0.08	0	0	295.15	-0.92	0.53	22	1.06174	119.946	13.4	21.1	1.3	72.5	24.3															3.2761	1386.67			0.81	6.76			0.056766	1.25946
2019-12-23_13:00:00	2019-12-23 23:00:02	0	28.66	11.68	0.07	0	0	295.26	-1.24	0.46	22.11	1.32257	110.353	5.8	20.9	1.4	54.6	16.5	371														34.5744	2002.38			1.4641	7.2361			0.0059949	0.579771
2019-12-23_14:00:00	2019-12-24 00:00:02	0	29.2	11.71	0.07	0	0.01	295.16	0.23	1.35	22.01	1.36945	189.669	4.6	20.5	0.6	39.7	14.2	356														50.5521	2108.46			2.2801	10.1761			0.592057	2.29385
2019-12-23_15:00:00	2019-12-24 01:00:02	0	29.57	11.83	0.08	0	0.01	294.93	-0.39	1.01	21.78	1.08268	158.886	6.3	20.3	0.7	131.4	14	382														30.5809	1944.63			2.1904	13.1044			0.146445	2.89448
2019-12-23_16:00:00	2019-12-24 02:00:02	0	28.99	11.69	0.08	0	0.01	294.91	0.12	0.88	21.76	0.888144	187.765	4.9	20.2	0.3	109	14.2	430														46.1041	2082.83			2.4336	13.9876			0.345914	5.27095
2019-12-23_17:00:00	2019-12-24 03:00:02	0	27.28	11.14	0.08	0	0.01	294.41	-1.8	-1.37	21.26	2.26206	52.725	5	20	0.5	215.5	17.4	438														37.6996	2124.1			1.5876	19.7136			3.10484	3.10484
2019-12-23_18:00:00	2019-12-24 04:00:02	0	27.48	11.14	0.08	0	0.01	293.68	0.69	1.01	20.53	1.22319	214.34	7.9	19.8	0.4	259.2	19.2	405														10.4976	1865.2			0.5329	28.8369			0.677646	3.4626
2019-12-23_19:00:00	2019-12-24 05:00:02	0	14.58	4.82	0.01	0	0.01	291.93	0.44	0.83	18.78	0.939415	207.929		19.7	0.5	232	21.9	342														23.2324	3295.68			0.8464	52.1284			0.193085	4.18033
2019-12-23_20:00:00	2019-12-24 06:00:02	0	15.16	5.18	0.03	0	0.01	292.93	0.27	1.17	19.78	1.20075	192.995		19.9	1.2	229.5	23.3	331														26.8324	3254.47			0.0144	36.2404			5.62149e-07	1.17343
2019-12-23_21:00:00	2019-12-24 07:00:02	0	16.48	5.51	0.02	0	0.01	293.95	-0.23	0.48	20.8	0.532259	154.398	3.9	20.9	1.4	214.4	28.4	340														2.5921	2789.74			0.01	16			0.752974	2.4079
2019-12-23_22:00:00	2019-12-24 08:00:02	0	18.87	6.27	0.01	0	0.01	295.61	-0.34	1.1	22.46	1.15135	162.824	7.5	21.7	1.2	203.2	28.4	311														1.5129	2348.18			0.5776	2.3716			0.00236711	1.2829
2019-12-23_23:00:00	2019-12-24 09:00:02	0	19.55	6.7	0	0	0.01	297.94	-0.78	1.25	24.79	1.4734	148.036	6.7	21.8	1.5	169.7	28.4	429														0	2384.17			8.9401	8.9401			0.000707696	0.260715
2019-12-24_00:00:00	2019-12-24 10:00:02	0	19.31	6.72	0	0	0	298	-2.22	1.26	24.85	2.55265	119.578	5.9	22.6	1.5	189.8	25.3	369														0.6724	2460.95			5.0625	5.0625			1.10806	1.10806
2019-12-24_01:00:00	2019-12-24 11:00:02	0	16.63	6.02	0	0	0	299.39	-3.71	1.01	26.24	3.84502	105.229	4.5	24.3	0.7	2.9	23.4	257														2.3104	2673.72			3.7636	23.4256			9.89117	9.89117
2019-12-24_02:00:00	2019-12-24 12:00:02	0	11.39	4.45	0.02	0	0	299.4	-3.91	1.64	26.25	4.24001	112.755	2.7	26.1	1.4	53.7	18.7	362														3.0625	3033.59			0.0225	44.2225			8.06567	8.06567
2019-12-24_03:00:00	2019-12-24 13:00:02	0	9.76	4.63	0.07	0	0	300.49	-4.43	1.34	27.34	4.62823	106.83	5.9	27.7	1.6	79.2	23.6	351														1.6129	2672.68			0.1296	87.2356			9.17017	9.17017
2019-12-24_04:00:00	2019-12-24 14:00:02	0	10.43	5.53	0.13	0	0	301.34	-5.1	1.89	28.19	5.43894	110.334	15.8	28.7	2.1	94.3	27.1	332														105.473	1672.65			0.2601	125.216			11.1485	16.4426
2019-12-24_05:00:00	2019-12-24 15:00:02	0	12.07	5.96	0.12	0	0	301.16	-5.25	2.28	28.01	5.72371	113.474	19.8	28.5	3.3	107.7	28.8	391														191.546	1329.92			0.2401	116.856			5.87439	30.6884
2019-12-24_06:00:00	2019-12-24 16:00:02	0	14.18	6.01	0.07	0	0	300.25	-5.05	2.15	27.1	5.48862	113.061	16.3	27.5	3.8	102.6	26	520														105.884	1593.45			0.16	79.21			2.85145	33.6937
2019-12-24_07:00:00	2019-12-24 17:00:02	0	17.46	6.39	0.02	0	0	299.15	-4.64	1.97	26	5.04088	113.004	17.1	26.7	3.2	120	33.1	577														114.704	1500.63			0.49	49			3.38885	22.6279
2019-12-24_08:00:00	2019-12-24 18:00:02	0	25.08	8.62	0	0	0	297.82	-4.19	1.89	24.67	4.59654	114.279	14.3	25.2	3.1	139.6	26.8	1065														32.2624	1545.12			0.2809	17.3889			2.23964	17.7455
2019-12-24_09:00:00	2019-12-24 19:00:02	0	35.31	11.72	0	0	0	295.91	-2.51	1.44	22.76	2.89373	119.843	15.9	23.6	2.6	151.6	35.8	843														17.4724	1197.71			0.7056	0.7056			0.08628	4.03903
2019-12-24_10:00:00	2019-12-24 20:00:02	0	42.46	13.6	0	0	0	293.62	-1.55	1.03	20.47	1.86102	123.605	16.8	22.7	1.6	154.3	35.3	809														10.24	1013.02			4.9729	6.4009			0.0681321	0.0681321
2019-12-24_11:00:00	2019-12-24 21:00:02	0	45.26	14.34	0	0	0	292.69	-1.19	1.31	19.54	1.7698	137.748	22.6	22.5	1.5	156.6	35.6	667														68.2276	639.483			8.7616	13.3956			0.0727933	0.0727933
2019-12-24_12:00:00	2019-12-24 22:00:02	0	47.81	15.07	0	0	0.01	292.42	-1.02	1.56	19.27	1.86387	146.821	21.3	22.1	1.2	148.2	30	631														38.8129	668.636			8.0089	18.7489			0.440719	0.440719
2019-12-24_13:00:00	2019-12-24 23:00:02	0	49.72	15.67	0	0	0.01	291.86	-0.97	1.59	18.71	1.86253	148.614	18.3	21.7	0.8	158.8	27.5	581														6.9169	798.515			8.9401	27.9841			1.12896	1.12896
2019-12-24_14:00:00	2019-12-25 00:00:02	0	49.48	15.71	0	0	0.01	291.59	-0.53	1.88	18.44	1.95328	164.256	11.8	21.2	0.7	171.9	23.6	526														15.2881	1205.34			7.6176	36.7236			1.57071	1.57071
2019-12-24_15:00:00	2019-12-25 01:00:02	0	47.11	15.13	0	0	0.01	291.3	-0.76	1.87	18.15	2.01854	157.882	12.5	20.1	0.9	190.4	21	469														6.9169	1197.02			3.8025	55.5025			1.25113	1.25113
2019-12-24_16:00:00	2019-12-25 02:00:02	0	42.59	13.94	0	0	0.01	290.89	-0.84	1.77	17.74	1.95921	154.612	9.7	19.6	0.7	204.7	20.8	582														17.9776	1489.03			3.4596	69.8896			1.58561	1.58561
2019-12-24_17:00:00	2019-12-25 03:00:02	0	39.82	13.21	0	0	0.01	290.91	-0.39	1.72	17.76	1.76366	167.224	11.2	19.2	0.5	245.7	20.8	551														4.0401	1430.2			2.0736	76.3876			1.59684	1.59684
2019-12-24_18:00:00	2019-12-25 04:00:02	0	40.74	13.46	0	0	0.01	291.62	-0.12	1.26	18.47	1.2657	174.56	8.8	19	0.5	185.5	18.5	733														21.7156	1597.44			0.2809	67.7329			0.586299	2.95255
2019-12-24_19:00:00	2019-12-25 05:00:02	0	42.4	13.85	0	0	0.02	291.75	0.26	1.23	18.6	1.25718	191.936	9.7	19.1	0.1	8.7	24	589														17.2225	1495.99			0.25	64			1.33906	4.52337
2019-12-24_20:00:00	2019-12-25 06:00:02	0	43.03	13.9	0	0	0.02	292.54	-0.43	1.14	19.39	1.2184	159.334	5.6	19.3	0.4	205.2	30.9	555														68.89	1825.68			0.0081	49.1401			0.66978	3.48046
2019-12-24_21:00:00	2019-12-25 07:00:02	0	40.44	13.3	0	0	0.01	294.37	-1.07	1	21.22	1.46455	133.063	2.4	20.9	0.1	136.1	26.3	743														118.81	2164.85			0.1024	12.8164			1.86199	3.6843
2019-12-24_22:00:00	2019-12-25 08:00:02	0	34.82	11.79	0	0	0	296.16	-1.24	1.17	23.01	1.70485	133.336	8.4	23	2.4	68.7	19.6	809														11.4921	1767.19			0.0001	0.0961			0.483239	0.483239
2019-12-24_23:00:00	2019-12-25 09:00:02	0	32.69	10.99	0	0	0	296.74	-1.4	1.6	23.59	2.12603	138.814	8.5	24.5	2.4	74.9	19.1	773														6.2001	1826.54			0.8281	5.7121			0.07506	1.08582
2019-12-25_00:00:00	2019-12-25 10:00:02	0	30.62	10.21	0	0	0	296.91	-2.5	1.18	23.76	2.76449	115.267	14.9	25.6	2.9	35.8	23.3	668														21.9961	1377.75			3.3856	13.3956			0.0183632	4.75453
2019-12-25_01:00:00	2019-12-25 11:00:02	0	28.84	9.52	0	0	0	298.02	-3.41	0.78	24.87	3.49807	102.884	15.4	26.1	2.9	70.4	21.5	609														34.5744	1391.89			1.5129	27.7729			0.357689	8.49181
2019-12-25_02:00:00	2019-12-25 12:00:02	0	29.19	9.4	0	0	0	298.13	-4.41	0.47	24.98	4.43497	96.0832	15.5	27.4	2.9	87.7	24	741														37.21	1393.38			5.8564	44.6224			2.35615	14.83
2019-12-25_03:00:00	2019-12-25 13:00:02	0	24.76	8.07	0	0	0	299.33	-4.48	0.16	26.18	4.48286	92.0453	19.7	28.6	2.6	83.2	25.4	707														135.257	1187.35			5.8564	82.4464			3.54515	12.9518
2019-12-25_04:00:00	2019-12-25 14:00:02	0	20.94	6.9	0	0	0	299.76	-4.82	-0.74	26.61	4.87647	81.2718	22.9	29	3.3	85.3	27.2	758														256	1051.58			5.7121	98.2081			2.48527	22.0193
2019-12-25_05:00:00	2019-12-25 15:00:02	0	19.32	6.46	0	0	0	300	-5.42	-0.43	26.85	5.43703	85.464	18.3	29	3.8	89.9	26.1	778														140.186	1403.85			4.6225	103.023			2.67987	33.0974
2019-12-25_06:00:00	2019-12-25 16:00:02	0	18.59	6.31	0	0	0	299.37	-5.39	-0.77	26.22	5.44472	81.87	19.2	28.9	3.9	87.3	25.9	680														166.152	1348.21			7.1824	88.7364			2.38617	34.3481
2019-12-25_07:00:00	2019-12-25 17:00:02	0	18.36	6.28	0	0	0	298.52	-5.35	-1.19	25.37	5.48075	77.46	22.2	27.8	3.9	77.4	23.4	392														253.446	1138.93			5.9049	55.8009			2.49876	34.7716
2019-12-25_08:00:00	2019-12-25 18:00:02	0	19.22	6.55	0	0	0	297.18	-4.8	-1.5	24.03	5.02892	72.6461	21.6	26.4	3.8	81.9	27	438														226.503	1161.31			5.6169	22.3729			1.51024	28.5681
2019-12-25_09:00:00	2019-12-25 19:00:02	0	20.6	6.98	0	0	0	295.47	-2.76	-1.02	22.32	2.94245	69.7176	16.4	25	3	74.4	24.9	540														88.7364	1509.17			7.1824	7.1824			0.00331224	6.04397
2019-12-25_10:00:00	2019-12-25 20:00:02	0	21.93	7.41	0.01	0	0	293.34	-1.72	-0.59	20.19	1.81838	71.067	10.9	23.3	2.1	77.6	27.1	560														12.1801	1928.79			9.6721	9.6721			0.0793107	0.188685
2019-12-25_11:00:00	2019-12-25 21:00:02	0	21.94	7.46	0.01	0	0	292.15	-1.37	-0.64	19	1.51212	64.9603	8.7	22.3	2.4	74.4	25	619														1.5376	2122.26			10.89	19.36			0.788335	0.788335
2019-12-25_12:00:00	2019-12-25 22:00:02	0	21.43	7.41	0.01	0	0.01	291.45	-0.79	-0.42	18.3	0.894707	62.003	9	21.5	1.7	71.5	17.1	602														2.5281	2099.29			10.24	34.81			0.648497	0.790843
2019-12-25_13:00:00	2019-12-25 23:00:02	0	20.52	7.3	0.02	0	0.01	290.96	-0.23	-0.54	17.81	0.586941	23.0705	11.3	20.4	0.9	76.9	22.9	585														16	1903.4			6.7081	56.1001			0.0980058	3.98824
2019-12-25_14:00:00	2019-12-26 00:00:02	0	19.51	7.11	0.02	0	0.01	290.43	-0.13	-1.08	17.28	1.0878	6.86377	11.9	18.1	0.4	245.9	16.6	546														22.9441	1867.8			0.6724	106.502			0.473063	3.98483
2019-12-25_15:00:00	2019-12-26 01:00:02	0	18.71	6.93	0.02	0	0.02	289.68	0.21	-1.16	16.53	1.17886	349.739	12.4	17.1	0.4	253	20.3	543														29.9209	1840.24			0.3249	145.685			0.606616	3.62958
2019-12-25_16:00:00	2019-12-26 02:00:02	0	18.04	6.75	0.02	0	0.02	290.26	0.33	-1.16	17.11	1.20603	344.12	8.9	16.7	0.4	270.7	20.6	510														4.6225	2169.51			0.1681	141.372			0.649679	3.52678
2019-12-25_17:00:00	2019-12-26 03:00:02	0	17.66	6.69	0.03	0	0.02	290.45	0.03	-1.17	17.3	1.17038	358.531	7	16.2	0.5	284	17.5	533														0.0961	2355.94			1.21	148.84			0.449415	3.2892
2019-12-25_18:00:00	2019-12-26 04:00:02	0	16.77	6.26	0.01	0	0.02	290.72	0.08	-0.96	17.57	0.963328	355.236	8.8	16	0.3	249	17.9	521														6.4516	2224.82			2.4649	147.137			0.440003	4.93139
2019-12-25_19:00:00	2019-12-26 05:00:02	0	16.14	5.98	0.01	0	0.01	291.08	-0.11	-0.93	17.93	0.936483	6.74566	9	16.2	0.3	177.8	23.1	555														9.1204	2232.37			2.9929	133.865			0.40511	5.05133
2019-12-25_20:00:00	2019-12-26 06:00:02	0	15.63	5.79	0.01	0	0.01	291.73	-0.12	-0.9	18.58	0.907965	7.59473	3.8	17.9	0.2	145.5	25.6	531														3.9601	2770.76			0.4624	85.0084			0.501214	5.64554
2019-12-25_21:00:00	2019-12-26 07:00:02	0	14.94	5.57	0	0	0.01	292.76	-0.09	-1.2	19.61	1.20337	4.28923	3.7	20.2	0.5	79.5	30.7	368														3.4969	2804.55			0.3481	34.6921			0.49473	3.17064
2019-12-25_22:00:00	2019-12-26 08:00:02	0	14.18	5.37	0	0	0.01	294.57	-0.47	-1.59	21.42	1.65801	16.4676	4.3	22.6	0.8	70.3	31.5	472														1.1449	2762.34			1.3924	2.8224			0.736183	1.05265
2019-12-25_23:00:00	2019-12-26 09:00:02	0	12.35	4.98	0.01	0	0.01	296.6	-0.74	-1.8	23.45	1.94618	22.3482	6.8	24.1	1	60.8	27.8	462														3.3124	2545			0.4225	3.4225			0.895249	0.895249
2019-12-26_00:00:00	2019-12-26 10:00:02	0	10.58	4.65	0.03	0	0.01	298.42	-1.06	-1.53	25.27	1.86132	34.7147	12.9	25.5	0.8	62.6	31.5	504														68.0625	1996.12			0.0529	25.7049			1.12639	1.12639
2019-12-26_01:00:00	2019-12-26 11:00:02	0	10.09	4.55	0.03	0	0.01	300.08	-1.36	-1.24	26.93	1.84043	47.6427	15.5	27.3	1.9	76.8	23.9	436														119.902	1778.98			0.1369	72.7609			0.00354802	0.0657588
2019-12-26_02:00:00	2019-12-26 12:00:02	0	10.14	4.82	0.05	0	0.01	301.66	-1.94	-0.92	28.51	2.14709	64.6286	19.8	29.4	2.1	85.2	20.2	579														224.4	1414.36			0.7921	149.084			0.00221757	0.582308
2019-12-26_03:00:00	2019-12-26 13:00:02	0	10.45	4.97	0.06	0	0.01	302.63	-3.1	-0.84	29.48	3.21179	74.8389	19.5	31.3	2.1	60.4	20.9	521														211.121	1425.67			3.3124	227.406			1.23608	3.34082
2019-12-26_04:00:00	2019-12-26 14:00:02	0	10.34	4.99	0.07	0	0	302.81	-4.55	-1.39	29.66	4.75758	73.0125	26	33	2.3	92.9	23.6	540														441.42	975.813			11.1556	287.642			6.03972	12.7705
2019-12-26_05:00:00	2019-12-26 15:00:02	0	9.5	4.34	0.05	0	0	302.2	-5.36	-1.95	29.05	5.70369	70.0084		32.9	3.5	77.4	38.9	510														18.8356	3351.02			14.8225	264.063			4.85626	32.7149
2019-12-26_06:00:00	2019-12-26 16:00:03	0	8.51	3.93	0.04	0	0	301.32	-5.4	-1.95	28.17	5.7413	70.1449	4.9	31.9	4.6	74.6	25	607														0.9409	2851.35			13.9129	206.497			1.30256	47.0225
2019-12-26_07:00:00	2019-12-26 17:00:03	0	7.98	3.74	0.04	0	0	300.24	-4.89	-2.24	27.09	5.37863	65.3887	12.2	30.1	4.6	76.6	14	658														71.5716	2142.58			9.0601	132.02			0.60627	42.1803
2019-12-26_08:00:00	2019-12-26 18:00:03	0	8.12	3.51	0.02	0	0	298.63	-4.25	-2.59	25.48	4.97701	58.6415	17.1	28.3	3.2	84.5	19	643														184.688	1732.06			7.9524	65.2864			3.15775	22.0243
2019-12-26_09:00:00	2019-12-26 19:00:03	0	9.46	3.84	0.01	0	0	296.26	-2.99	-1.88	23.11	3.53193	57.84	15.6	26.9	2.6	83	21	645														138.298	1830.81			14.3641	18.5761			0.868486	7.01151
2019-12-26_10:00:00	2019-12-26 20:00:03	0	11.83	4.81	0.03	0	0.01	294.06	-2.52	-1.57	20.91	2.96906	58.0766	13.9	25.4	2.1	67.2	13	563														82.6281	1893.82			20.1601	20.1601			0.75526	2.51241
2019-12-26_11:00:00	2019-12-26 21:00:03	0	11.39	4.56	0.02	0	0.01	292.24	-1.28	-1.47	19.09	1.94918	41.0478	13.3	23.3	1.1	93	18.3	576														76.3876	1968.52			17.7241	17.7241			0.721106	0.721106
2019-12-26_12:00:00	2019-12-26 22:00:03	0	11.39	5.08	0.06	0	0.02	290.88	-0.15	-1.52	17.73	1.52738	5.63602	7.1	21.6	0.5	138.2	20.4	649														4.0804	2504.8			14.9769	40.5769			1.05552	2.12173
2019-12-26_13:00:00	2019-12-26 23:00:03	0	12.51	6.49	0.15	0	0.02	290.31	0.6	-0.8	17.16	1	323.13	2.7	20	0.6	270.3	17.1	658														14.3641	2813.03			8.0656	72.9316			0.16	3.54946
2019-12-26_14:00:00	2019-12-27 00:00:03	0	13.12	7.34	0.2	0	0.01	289.98	0.52	-0.23	16.83	0.568595	293.86	5.3	18.3	0.6	235.7	16.7	759														4.1616	2458.97			2.1609	111.725			0.000986289	5.3611
2019-12-26_15:00:00	2019-12-27 01:00:03	0	13	7.39	0.21	0	0.01	289.57	-0.1	-0.36	16.42	0.373631	15.5242	4.5	17.7	0.8	202.5	25.3	466														8.3521	2533.91			1.6384	134.096			0.181791	5.33781
2019-12-26_16:00:00	2019-12-27 02:00:03	0	13.39	7.79	0.23	0	0.01	288.8	-0.58	-0.62	15.65	0.848999	43.091	6.3	16.8	0.5	249.7	22	389														2.2201	2317.27			1.3225	175.562			0.121801	4.55823
2019-12-26_17:00:00	2019-12-27 03:00:03	0	12.97	7.39	0.2	0	0.01	287.99	-0.71	-1.27	14.84	1.45499	29.2077	4.8	16.2	0.4	292.3	15.1	335														6.7081	2503.8			1.8496	214.916			1.11301	2.65367
2019-12-26_18:00:00	2019-12-27 04:00:03	0	12.3	6.75	0.16	0	0.01	287.4	-0.38	-1.59	14.25	1.63478	13.4413	6.2	15.3	0.4	239.4	15.4	358														0.3025	2428.32			1.1025	260.823			1.52468	2.10024
2019-12-26_19:00:00	2019-12-27 05:00:03	0	12.15	6.66	0.15	0	0.01	286.96	0.18	-1.8	13.81	1.80898	354.289	11.8	14.7	0.3	270.4	17.4	288														26.4196	1915.64			0.7921	295.496			2.27701	2.27701
2019-12-26_20:00:00	2019-12-27 06:00:03	0	12.41	7.05	0.18	0	0.01	289.96	-0.07	-1.07	16.81	1.07229	3.74307	7.3	15.1	0.3	317.2	18.1	327														0.0625	2292.3			2.9241	190.164			0.596428	4.45933
2019-12-26_21:00:00	2019-12-27 07:00:03	0	10.66	5.66	0.11	0	0.01	292.52	-0.48	-1.89	19.37	1.95	14.2501	1.5	19	0.5	225.8	54.9	339														17.3056	3032.48			0.1369	53.7289			2.1025	2.1025
2019-12-26_22:00:00	2019-12-27 08:00:03	0	8.78	4.47	0.06	0	0	295.12	-0.74	-2.28	21.97	2.39708	17.9815	22.2	21.9	0.4	179.4	65.6	394														314.353	1264.37			0.0049	3.3489			3.98833	3.98833
2019-12-26_23:00:00	2019-12-27 09:00:03	0	6.89	3.46	0.04	0	0	297.55	-0.77	-2.39	24.4	2.51098	17.8578	16	24.2	0.8	60.1	27.1	421														157.252	1829.1			0.04	8.41			2.92744	2.92744
2019-12-27_00:00:00	2019-12-27 10:00:03	0	5.58	2.84	0.03	0	0	299.71	-0.76	-2.55	26.56	2.66085	16.5962	13.7	25.9	1.5	79	16.6	440														117.94	2087.39			0.4356	45.6976			1.34756	1.34756
2019-12-27_01:00:00	2019-12-27 11:00:03	0	4.67	2.41	0.03	0	0	301.59	-1.1	-2.39	28.44	2.63099	24.7144	20.9	28.1	1.4	86.1	3.9	326														341.88	1514.61			0.1156	117.506			1.51533	1.51533
2019-12-27_02:00:00	2019-12-27 12:00:03	0	4.19	2.14	0.03	0	0	303.29	-1.65	-2.36	30.14	2.8796	34.9595	40.5	30.3	1.8	78	15.6	457														1471.49	1471.49			0.0256	217.268			1.16554	1.42946
2019-12-27_03:00:00	2019-12-27 13:00:03	0	4.18	2.21	0.04	0	0	304.63	-2.03	-2.44	31.48	3.17404	39.7595	23.1	31.9	2.3	86.1	19.3	463														436.392	1362.94			0.1764	312.582			0.763938	3.96024
2019-12-27_04:00:00	2019-12-27 14:00:03	0	5.1	2.71	0.05	0	0	305.52	-2.64	-2.35	32.37	3.53442	48.3262	10.3	33.2	2.7	76.6	19.7	595														57.6081	2422.41			0.6889	394.817			0.696251	7.56479
2019-12-27_05:00:00	2019-12-27 15:00:03	0	8.11	3.83	0.05	0	0.01	305.26	-4.17	-2.46	32.11	4.84154	59.4626	5.5	33.3	3.9	71.8	31.4	533														2.7889	2798.2			1.4161	388.484			0.886496	27.6417
2019-12-27_06:00:00	2019-12-27 16:00:03	0	10.83	4.43	0.03	0	0.01	303.56	-5.33	-2.76	30.41	6.00221	62.6239		31.7	4.3	76	17.4	2132														19.6249	3340.61			1.6641	269.288			2.89751	46.488
2019-12-27_07:00:00	2019-12-27 17:00:03	0	10.67	4.31	0.03	0	0	301.64	-5.24	-2.61	28.49	5.85403	63.5226	-1.9	30.2	3.7	77.2	15.1	1574														38.5641	3578.19			2.9241	168.74			4.63986	36.8453
2019-12-27_08:00:00	2019-12-27 18:00:03	0	12.36	5.33	0.06	0	0	299.45	-4.45	-2.3	26.3	5.00924	62.6678	0.5	28.3	3.2	82.2	14.6	674														23.3289	3180.73			4	79.21			3.27335	22.3279
2019-12-27_09:00:00	2019-12-27 19:00:03	0	17.76	8.13	0.15	0	0	296.85	-3.02	-1.51	23.7	3.37646	63.4351		26.2	2.4	92.5	20.7	433														66.0969	2926.59			6.25	17.64			0.953479	5.25538
2019-12-27_10:00:00	2019-12-27 20:00:03	0	21.63	10.08	0.2	0	0.01	294.79	-2.26	-1.15	21.64	2.53576	63.0309		24.1	1.5	94.6	19.4	301														101.606	2719.41			6.0516	6.0516			1.07281	1.07281
2019-12-27_11:00:00	2019-12-27 21:00:03	0	22.94	11.63	0.29	0	0.01	293.21	-1.03	-0.94	20.06	1.39445	47.6159	-0.3	22.6	1.1	91.5	15.7	361														142.325	2590.61			6.4516	9.2416			0.0867027	0.979203
2019-12-27_12:00:00	2019-12-27 22:00:03	0	23.08	12.2	0.34	0	0.02	292.48	-0.31	-0.92	19.33	0.970824	18.6217	5.4	21.4	0.6	106.3	15.5	363														46.24	1991.66			4.2849	24.7009			0.137511	3.66024
2019-12-27_13:00:00	2019-12-27 23:00:03	0	22.14	11.71	0.32	0	0.02	292.06	0.23	-0.36	18.91	0.4272	327.426	7.5	19.4	0.6	199.9	16.5	335														17.7241	1850.55			0.2401	54.6121			0.0298598	6.03587
2019-12-27_14:00:00	2019-12-28 00:00:03	0	20.68	10.95	0.28	0	0.01	291.56	0.14	-0.46	18.41	0.480833	343.073	6.7	18.2	0.4	273	21.4	359														18.0625	1987.2			0.0441	82.6281			0.00653391	6.77648
2019-12-27_15:00:00	2019-12-28 01:00:03	0	20.16	11.05	0.3	0	0.01	290.72	-0.81	-0.85	17.57	1.17414	43.6198	10.2	17	0.3	187.5	17.5	225														0.7225	1679.2			0.3249	123.877			0.764117	4.03955
2019-12-27_16:00:00	2019-12-28 02:00:03	0	19.98	11.3	0.32	0	0.01	290.04	-1.56	-1.4	16.89	2.09609	48.0942	6.8	15.9	0.3	235.5	16.8	165														20.25	1947.28			0.9801	166.668			3.22595	3.22595
2019-12-27_17:00:00	2019-12-28 03:00:03	0	19.24	11.37	0.33	0	0.01	289.83	-1.65	-2.02	16.68	2.60824	39.2431	6.9	15.4	0.3	318.9	12.2	143														19.9809	1932.31			1.6384	185.504			5.32796	5.32796
2019-12-27_18:00:00	2019-12-28 04:00:03	0	18.85	11.76	0.37	0	0.01	289.24	-1.36	-2.2	16.09	2.58643	31.7237	5.7	14.7	0.2	188.7	11.3	174														36.7236	2004.17			1.9321	222.308			5.69503	5.69503
2019-12-27_19:00:00	2019-12-28 05:00:03	0	19.84	13.29	0.46	0	0.01	288.56	-1.21	-2.06	15.41	2.38908	30.4292	9.3	14.2	0.1	7	11.5	196														15.9201	1571.17			1.4641	258.888			5.23988	5.23988
2019-12-27_20:00:00	2019-12-28 06:00:03	0	21.79	15.67	0.59	0	0.01	290.38	-1	-1	17.23	1.41421	45.0001	7.5	14.3	0.2	203.2	18.9	263														66.7489	1525.53			8.5849	200.789			1.47431	3.4961
2019-12-27_21:00:00	2019-12-28 07:00:03	0	23.11	17.22	0.67	0	0.01	293.64	-1.29	-0.57	20.49	1.41032	66.1614		18	0.4	214.5	28.7	260														296.528	2025.72			6.2001	51.9841			1.02074	2.80121
2019-12-27_22:00:00	2019-12-28 08:00:03	0	25.99	20.3	0.84	0	0.01	297.41	-1.02	-0.4	24.26	1.09563	68.5872		21.3	0.3	52.3	24.6	424														412.09	1757.96			8.7616	8.7616			0.633023	4.3613
2019-12-27_23:00:00	2019-12-28 09:00:03	0	29.74	24.25	1.05	0	0.01	301.23	-1	-0.93	28.08	1.36561	47.0773	-0.4	24.1	1	72.8	26.9	565														607.622	1472.87			15.8404	41.9904			0.133673	1.25079
2019-12-28_00:00:00	2019-12-28 10:00:03	0	30.91	25.68	1.13	0	0.01	304.56	-1.27	-1.15	31.41	1.7133	47.8389	13.4	26.5	1.1	73	40.9	573														150.798	535.83			24.1081	149.084			0.376138	0.449837
2019-12-28_01:00:00	2019-12-28 11:00:03	0	29.75	24.95	1.08	0	0.01	307.11	-1.56	-1.56	33.96	2.20617	45.0001	28.6	29.3	1.1	55.5	51.9	323														13.3225	75.3077			21.7156	308.354			1.22362	1.22362
2019-12-28_02:00:00	2019-12-28 12:00:03	0	30.92	26.32	1.13	0	0	308.9	-1.83	-1.93	35.75	2.65966	43.4766	38.5	32.3	1.1	72.8	42.3	296														148.352	148.352			11.9025	499.522			2.43254	2.43254
2019-12-28_03:00:00	2019-12-28 13:00:03	0	32.41	27.83	1.19	0	0	309.97	-2.04	-1.86	36.82	2.76065	47.6427	56.4	35.7	1.6	64.5	32.9	257														816.245	816.245			1.2544	719.312			1.34711	1.34711
2019-12-28_04:00:00	2019-12-28 14:00:03	0	32.76	28.23	1.21	0	0	310.66	-2.39	-1.96	37.51	3.09091	50.6455	50.4	38.4	2.5	68.9	22.6	301														491.509	491.509			0.7921	912.644			0.34917	4.43905
2019-12-28_05:00:00	2019-12-28 15:00:03	0	33.4	28.88	1.25	0	0	310.97	-2.98	-2.72	37.82	4.0347	47.6118	30.4	39.7	2.5	87.1	20.4	437														2.3104	8.6907			3.5344	1012.51			2.3553	9.30677
2019-12-28_06:00:00	2019-12-28 16:00:03	0	31.22	26.65	1.17	0	0.01	310.37	-3.29	-3.49	37.22	4.79627	43.3105	24.6	39.2	3.8	64.8	65.8	542														4.2025	120.516			3.9204	943.718			0.992553	26.1353
2019-12-28_07:00:00	2019-12-28 17:00:03	0	22.61	17.54	0.71	0	0.01	308.64	-3.73	-3.41	35.49	5.05381	47.5663	23.4	37.1	4.3	80.4	31.9	377														34.3396	453.179			2.5921	723.072			0.56823	34.4547
2019-12-28_08:00:00	2019-12-28 18:00:03	0	18.69	11.51	0.38	0	0.01	304.9	-3.45	-1.89	31.75	3.93378	61.2851	20.3	34.9	3.5	78.8	39.8	495														77.2641	925.255			9.9225	438.902			0.188162	15.6007
2019-12-28_09:00:00	2019-12-28 19:00:03	0	21.79	12.57	0.39	0	0.01	300.83	-2.67	-1.45	27.68	3.03832	61.495	17.7	31.7	2.2	80	35.3	951														26.3169	1021.31			16.1604	187.142			0.702784	3.07765
2019-12-28_10:00:00	2019-12-28 20:00:03	0	24.61	14.69	0.5	0.01	0.02	299.23	-0.64	0.42	26.08	0.765506	123.275	11.1	28.5	0.8	105.5	37.2	1253														12.8881	1327.73			5.8564	78.8544			0.00118981	3.68062
2019-12-28_11:00:00	2019-12-28 21:00:03	0	23.71	14.13	0.47	0	0.02	298.27	-1.2	0.81	25.12	1.44779	124.019	10.5	26.4	0.6	114	30	1208														13.1769	1413.61			1.6384	33.8724			0.71875	2.0627
2019-12-28_12:00:00	2019-12-28 22:00:03	0	22.85	13.93	0.48	0	0.01	297.24	-1.84	-1.4	24.09	2.31206	52.7337	12.1	24	0.7	203.6	34.4	870														3.3489	1310.3			0.0081	5.7121			2.59872	2.59872
2019-12-28_13:00:00	2019-12-28 23:00:03	0	33.34	24.22	1.07	0	0.01	297.05	-1.07	-2.32	23.9	2.55486	24.7596	9.5	22.4	0.7	206.6	37.4	795														216.678	812.706			2.25	2.25			3.4405	3.4405
2019-12-28_14:00:00	2019-12-29 00:00:03	0	55.03	44.99	2.23	0.01	0.01	296.59	-0.51	-2.29	23.44	2.3461	12.5554	10.5	21.8	0.9	196.9	34.4	1051														1189.56	1189.56			2.6896	2.6896			2.09121	2.09121
2019-12-28_15:00:00	2019-12-29 01:00:03	0	72.61	62.45	3.19	0.01	0.01	295.11	-0.48	-2.5	21.96	2.54566	10.8686	11.3	20.8	0.9	206.6	33.7	1262														2616.32	2616.32			1.3456	8.6436			2.70821	2.70821
2019-12-28_16:00:00	2019-12-29 02:00:03	0	78.71	69.29	3.51	0.01	0.01	294.61	0.1	-1.92	21.46	1.9226	357.019	11.2	20.2	1.5	221.2	31.8	509														3374.45	3374.45			1.5876	16.3216			0.178593	0.178593
2019-12-28_17:00:00	2019-12-29 03:00:03	0	76.91	67.73	3.36	0.01	0.01	293.24	-1.84	-0.59	20.09	1.93228	72.2216	7.6	20.2	1.2	201.3	32	521														3615.62	3615.62			0.0121	29.2681			0.536232	0.536232
2019-12-28_18:00:00	2019-12-29 04:00:03	0	77.79	68.78	3.38	0.01	0.01	292.44	-1.34	-1.64	19.29	2.11783	39.2514	8.2	18.7	0.4	213.6	27.8	540														3669.94	3669.94			0.3481	59.4441			2.95094	2.95094
2019-12-28_19:00:00	2019-12-29 05:00:03	0	83.14	73.93	3.62	0.01	0.01	292.97	0	-1.27	19.82	1.27	7.60198e-05	10.7	17.7	0.4	276	26	416														3998.03	3998.03			4.4944	66.9124			0.7569	3.2906
2019-12-28_20:00:00	2019-12-29 06:00:03	0	85.93	76.47	3.72	0.01	0.01	296.42	0.34	-0.08	23.27	0.349285	283.241	14.6	17.3	0.4	257.9	28	376														3827.9	3827.9			35.6409	35.6409			0.00257201	7.47867
2019-12-28_21:00:00	2019-12-29 07:00:03	0	86.94	77.47	3.74	0.01	0.01	298.46	-0.37	0.04	25.31	0.372156	96.17	10.6	18.6	0.5	315.6	43.8	500														4471.6	4471.6			45.0241	45.0241			0.0163441	6.82173
2019-12-28_22:00:00	2019-12-29 08:00:03	0	85.58	76.29	3.65	0.01	0.01	300.94	-0.39	-0.19	27.79	0.43382	64.0257	20.9	21.5	0.3	17.1	64.5	606														3068.05	3068.05			39.5641	39.5641			0.0179079	7.56349
2019-12-28_23:00:00	2019-12-29 09:00:03	0	83.7	74.85	3.57	0.01	0.01	304.16	-0.29	-0.58	31.01	0.64846	26.5651	16.4	23.1	0.2	24.2	56.1	635														3416.4	3416.4			62.5681	70.7281			0.201116	6.94607
2019-12-29_00:00:00	2019-12-29 10:00:03	0	78.82	70.8	3.36	0.01	0.01	307.27	-0.17	-0.96	34.12	0.974936	10.0421	41.6	25.2	0.8	68.9	165.6	659														852.64	2517.23			79.5664	185.504			0.0306026	2.9209
2019-12-29_01:00:00	2019-12-29 11:00:03	0	66.72	59.89	2.77	0.01	0.01	309.74	-0.45	-1.07	36.59	1.16078	22.8098	101.7	27.6	1.1	64.9	204.4	566														1748.08	9872.81			80.8201	341.88			0.00369367	1.49628
2019-12-29_02:00:00	2019-12-29 12:00:03	0.03	55.19	48.95	2.21	0.01	0.01	311.23	-0.77	-1.04	38.08	1.29402	36.5158	122.2	30.4	0.9	82.2	143.6	663														5365.56	11864			58.9824	518.928			0.155255	1.66404
2019-12-29_03:00:00	2019-12-29 13:00:03	0.1	46.49	40.51	1.79	0	0	311.92	-1.19	-0.24	38.77	1.21396	78.5976	109.4	32.4	0.8	36.9	136.1	653														4745.83	7688.13			40.5769	648.721			0.171363	2.16102
2019-12-29_04:00:00	2019-12-29 14:00:03	0.17	42.84	36.87	1.6	0	0	312.47	-2.1	0.13	39.32	2.10402	93.5422	115.4	34.1	0.7	23.5	159.8	857														6166.96	8107.56			27.2484	768.398			1.97127	1.97127
2019-12-29_05:00:00	2019-12-29 15:00:03	0.13	43.76	37.74	1.62	0	0.01	312.43	-3.25	-0.23	39.28	3.25813	85.9521	133.7	35.2	0.2	141.7	165.4	636														9208.32	11927.3			16.6464	828.288			9.35215	9.35215
2019-12-29_06:00:00	2019-12-29 16:00:03	0.12	43.82	37.02	1.63	0.01	0.01	307.67	1.37	2.38	34.52	2.74614	209.926	121.4	37.3	0.5	227.1	159.2	1311														7119.98	9252.9			7.7284	682.254			5.04516	5.04516
2019-12-29_07:00:00	2019-12-29 17:00:03	0.13	46.16	38.89	1.73	0.01	0.01	306.91	-0.14	-0.49	33.76	0.509608	15.9455		37.1	1.4	120.7	147.1	1545														1512.43	1512.43			11.1556	633.026			0.792798	2.47871
2019-12-29_08:00:00	2019-12-29 18:00:03	0.09	39.49	32.27	1.37	0	0.01	305.88	-1.1	-1.51	32.73	1.86818	36.0726		34.6	2	125.7	130.3	1832														1041.35	1041.35			3.4969	467.857			0.0173763	0.147595
2019-12-29_09:00:00	2019-12-29 19:00:03	0.05	33.44	25.91	1.04	0	0.01	303.11	-1.28	-1.39	29.96	1.88958	42.6409	41.1	31.6	1.9	167.1	75.2	6545														230.736	230.736			2.6896	251.54			0.000108646	0.0933771
2019-12-29_10:00:00	2019-12-29 20:00:03	0.02	29.07	21.21	0.8	0	0.01	301.26	-1.39	-0.95	28.11	1.68363	55.6493	36.3	29.5	2.8	184.6	75.5	7508														227.708	227.708			1.9321	141.848			1.24629	1.24629
2019-12-29_11:00:00	2019-12-29 21:00:03	0.02	27.33	19.53	0.72	0	0.01	299.5	-1.76	-0.74	26.35	1.90924	67.1956	42.3	27.3	1.4	199.7	65.3	4974														518.473	518.473			0.9025	63.2025			0.259326	0.259326
2019-12-29_12:00:00	2019-12-29 22:00:03	0.01	23.42	15.91	0.53	0.01	0.02	298.8	-1.99	-1.42	25.65	2.44469	54.4897	41.7	25.3	0.8	151.7	69.3	4485														665.124	665.124			0.1225	27.5625			2.705	2.705
2019-12-29_13:00:00	2019-12-29 23:00:03	0.03	28.28	20.7	0.8	0.01	0.02	298.46	-1.16	-1.93	25.31	2.25178	31.0075	33.7	23.5	0.8	168.3	60.7	5375														169	169			3.2761	9.6721			2.10766	2.10766
2019-12-29_14:00:00	2019-12-30 00:00:03	0.03	33.21	25.63	1.07	0.01	0.01	296.49	-0.66	-2.07	23.34	2.17267	17.6845	22.7	21.9	0.8	175	49.9	5347														8.5849	193.154			2.0736	2.0736			1.88423	1.88423
2019-12-29_15:00:00	2019-12-30 01:00:03	0.05	43.22	35.29	1.56	0.01	0.01	296.02	0.15	-2.13	22.87	2.13528	355.972	18.4	20.5	0.5	190.3	43.6	4917														285.272	285.272			5.6169	5.6169			2.67412	2.67412
2019-12-29_16:00:00	2019-12-30 02:00:03	0.05	44.86	37.16	1.65	0.01	0.01	295.83	-0.08	-2.36	22.68	2.36136	1.94156	17.5	19.4	0.8	240.9	33.8	4334														386.516	386.516			10.7584	13.1044			2.43783	2.43783
2019-12-29_17:00:00	2019-12-30 03:00:03	0.05	42.5	35.38	1.56	0	0.01	295.66	0.55	-1.93	22.51	2.00684	344.094	11	18.8	1	211.5	29.9	2979														594.384	594.384			13.7641	19.2721			1.01372	1.01372
2019-12-29_18:00:00	2019-12-30 04:00:03	0.06	44.2	37.32	1.66	0	0.01	295.67	0.4	-0.82	22.52	0.91236	333.997	8.4	18.6	0.8	197.3	28.1	1992														836.366	836.366			15.3664	20.9764			0.0126247	3.13871
2019-12-29_19:00:00	2019-12-30 05:00:03	0.06	48.23	41.22	1.85	0.01	0.01	294.89	-0.23	-0.73	21.74	0.765376	17.4881	7.9	18	0.7	189.3	22.7	1691														1110.22	1110.22			13.9876	35.5216			0.00427399	4.07484
2019-12-29_20:00:00	2019-12-30 06:00:03	0.07	51.72	44.57	2	0.01	0.01	297.29	-0.04	-0.28	24.14	0.282843	8.13019	5.8	17.6	0.4	306	24.5	1494														1503.11	1503.11			42.7716	42.7716			0.0137258	7.84648
2019-12-29_21:00:00	2019-12-30 07:00:03	0.07	54.43	47.14	2.11	0.01	0.01	299.71	-0.56	0.06	26.56	0.563205	96.1154	5.5	19.4	0.4	290.6	49.5	1503														1733.89	1733.89			51.2656	51.2656			0.0266359	6.35441
2019-12-29_22:00:00	2019-12-30 08:00:03	0.07	54.03	46.79	2.09	0.01	0.01	302.46	-0.64	0.22	29.31	0.676757	108.97	7.5	21.8	0.5	191.7	38.8	1157														1543.7	1543.7			56.4001	56.4001			0.031243	5.32337
2019-12-29_23:00:00	2019-12-30 09:00:03	0.08	58.67	51.09	2.29	0.01	0.01	305.6	-0.5	-0.92	32.45	1.04709	28.5232	12.2	24	0.6	82.8	39.7	1114														1512.43	1512.43			71.4025	115.563			0.199891	3.37423
2019-12-30_00:00:00	2019-12-30 10:00:03	0.14	61.75	53.54	2.38	0.01	0.01	308.52	-0.71	-1.39	35.37	1.56083	27.0577	21.4	26.2	1	53.4	94.3	1042														1032.98	1032.98			84.0889	251.857			0.314534	0.852237
2019-12-30_01:00:00	2019-12-30 11:00:03	0.62	53.9	44.19	1.86	0	0	310.6	-0.84	-1.94	37.45	2.11405	23.4122	96.2	28.3	1.2	52.2	352.9	801														2705.04	6109.3			83.7225	402.003			0.835484	0.835484
2019-12-30_02:00:00	2019-12-30 12:00:03	0.79	49.51	39.8	1.63	0	0	311.75	-1.22	-2.44	38.6	2.728	26.5651	178.9	31.7	1.4	69.1	205	872														19348.8	24483.5			47.61	605.16			1.76359	1.76359
2019-12-30_03:00:00	2019-12-30 13:00:03	0.9	47.73	37.72	1.54	0	0	312.32	-1.25	-2.98	39.17	3.23155	22.7563	155.3	34.9	1.6	74.2	154.8	705														13825.1	17106.5			18.2329	804.857			2.66195	2.66195
2019-12-30_04:00:00	2019-12-30 14:00:03	1.07	47.3	36.66	1.51	0	0	312.62	-1.32	-3.31	39.47	3.5635	21.7418	135.2	38.5	2.4	81.1	117	644														9710.13	12019.2			0.9409	1041.35			1.35372	6.1479
2019-12-30_05:00:00	2019-12-30 15:00:03	1.16	47.07	36.05	1.5	0	0	311.99	-0.94	-2.83	38.84	2.98203	18.3743	120.7	40.6	3	63.1	132.8	800														7165.62	8934.41			3.0976	1138.39			0.000322939	6.24015
2019-12-30_06:00:00	2019-12-30 16:00:03	1.01	43.62	33.07	1.37	0	0	309.65	-0.76	-0.15	36.5	0.774661	78.8353	117.4	39.9	4.1	72.8	157.9	1282														7111.55	7786.65			11.56	942.49			11.0579	11.0579
2019-12-30_07:00:00	2019-12-30 17:00:03	0.79	43.5	33.15	1.4	0	0.01	308.25	-0.05	-0.82	35.1	0.821523	3.4894	76.8	36.8	4.1	72.3	75.3	798														1905.32	2277.39			2.89	686.44			10.7484	10.7484
2019-12-30_08:00:00	2019-12-30 18:00:03	0.52	39.03	28.86	1.2	0	0.01	307.48	-1.41	0.05	34.33	1.41089	92.0308	46.5	34.7	2	81.9	68.4	872														311.17	311.17			0.1369	544.289			0.347055	0.347055
2019-12-30_09:00:00	2019-12-30 19:00:03	0.15	28.5	18.27	0.65	0	0.01	304.08	-2.21	-0.6	30.93	2.29	74.8109	61.1	32.5	0.7	125.9	119.2	2881														1834.41	1834.41			2.4649	314.353			2.5281	2.5281
2019-12-30_10:00:00	2019-12-30 20:00:03	0.04	23.69	13.26	0.38	0	0.01	302.26	-3.03	-1.2	29.11	3.25897	68.3946	88	29.6	0.6	162.9	137.9	12209														5586.07	5586.07			0.2401	169.26			7.07013	7.07013
2019-12-30_11:00:00	2019-12-30 21:00:03	0.01	22.5	12.54	0.37	0	0.01	301.05	-2.97	-0.85	27.9	3.08924	74.0293	93	26.5	0.6	257.2	126.3	6519														6473.81	6473.81			1.96	75.69			6.19631	6.19631
2019-12-30_12:00:00	2019-12-30 22:00:03	0.01	27.2	17.43	0.66	0	0.01	299.45	-2.31	-2.61	26.3	3.48543	41.5108	87.5	24.9	0.9	220	129.4															4909.8	4909.8			1.96	30.25			6.68443	6.68443
2019-12-30_13:00:00	2019-12-30 23:00:03	0.04	37.24	27.32	1.21	0.01	0.01	298.64	-0.21	-2.53	25.49	2.5387	4.74498	75.5	24.5	0.6	233.7	112.9	4238														2321.31	2321.31			0.9801	18.4041			3.75856	3.75856
2019-12-30_14:00:00	2019-12-31 00:00:03	0.23	54.09	43.5	2.06	0.01	0.01	297.29	0.17	-1.9	24.14	1.90759	354.887	67.9	22.1	0.6	290	103	4844														595.36	2417.89			4.1616	4.1616			1.70979	1.70979
2019-12-30_15:00:00	2019-12-31 01:00:03	0.5	64.01	53.32	2.49	0.01	0.01	297.13	1.1	-1.77	23.98	2.08396	328.14	63.8	20.4	0.3	274.4	95.9	3632														109.83	3013.13			12.8164	12.8164			3.18252	3.18252
2019-12-30_16:00:00	2019-12-31 02:00:03	0.35	40.35	32.28	1.38	0	0.01	296.71	0.45	-1.87	23.56	1.92338	346.47	59	19	0.1	298.4	90.5	1637														713.958	844.019			20.7936	20.7936			3.32472	3.32472
2019-12-30_17:00:00	2019-12-31 03:00:03	0.16	23.11	17.07	0.63	0	0.01	296.07	-0.38	-2.51	22.92	2.5386	8.60897	60.5	17.9	0.4	226.4	93	1729														1886.16	1886.16			25.2004	25.2004			4.57362	4.57362
2019-12-30_18:00:00	2019-12-31 04:00:03	0.07	15.06	10.31	0.32	0	0.01	296.06	-0.19	-2.95	22.91	2.95611	3.68523	64.2	17	0.1	248.6	93.1	2375														2904.13	2904.13			34.9281	34.9281			8.15738	8.15738
2019-12-30_19:00:00	2019-12-31 05:00:03	0.02	10.21	6.44	0.17	0	0.01	296.64	0.79	-3.25	23.49	3.34464	346.338	64.7	16.4	0	103.5	104.6	2511														3394.23	3394.23			50.2681	50.2681			11.1866	11.1866
2019-12-30_20:00:00	2019-12-31 06:00:03	0	6.72	3.76	0.07	0	0	299.8	2.09	-2.74	26.65	3.44611	322.665	75.1	16.5	0.1	272	148.4	2693														5089.4	5089.4			103.023	103.023			11.1965	11.1965
2019-12-30_21:00:00	2019-12-31 07:00:03	0	5.59	2.91	0.04	0	0	304.02	3.47	-3.39	30.87	4.85108	314.332	105.7	20.3	0.3	152	204.9	2988														10565.8	10565.8			111.725	111.725			20.7124	20.7124
2019-12-30_22:00:00	2019-12-31 08:00:03	0	5.41	2.75	0.04	0	0	305.83	3.41	-4	32.68	5.25624	319.552	127.5	24.8	0.4	132.9	202.9	2580														15562.6	15562.6			62.0944	138.768			23.5831	23.5831
2019-12-30_23:00:00	2019-12-31 09:00:03	0	5.26	2.67	0.04	0	0	307.58	2.86	-4.49	34.43	5.3235	327.504	122.6	30.6	0.6	83.8	152.7	2337														14383.2	14383.2			14.6689	373.649			22.3115	22.3115
2019-12-31_00:00:00	2019-12-31 10:00:03	0	5.45	2.83	0.04	0	0	308.97	3.22	-4.91	35.82	5.87167	326.743	103.9	37.8	1.5	24.2	110.1	2412														10215.1	10215.1			3.9204	779.526			19.1115	19.1115
2019-12-31_01:00:00	2019-12-31 11:00:03	0.01	6.61	3.8	0.08	0	0	310.15	3.56	-4.84	37	6.00826	323.664	74.9	42	3	326.8	48.9	2035														5055.21	5055.21			25	1108.89			9.04963	30.5175
2019-12-31_02:00:00	2019-12-31 12:00:03	0.05	9.31	6.11	0.18	0	0	311.17	3.58	-4.62	38.02	5.84472	322.228	48.5	43.1	3.3	323.1	65	2398														1796.91	1796.91			25.8064	1254.58			6.47562	32.0438
2019-12-31_03:00:00	2019-12-31 13:00:03	0.11	14.22	10.31	0.38	0	0	311.79	3.44	-4.49	38.64	5.6563	322.543	41.1	43.8	3.2	296.9	57	2571														948.024	948.024			26.6256	1349.83			6.0334	28.8616
2019-12-31_04:00:00	2019-12-31 14:00:03	0.14	17.45	13.1	0.5	0	0	312.26	3.19	-4.35	39.11	5.39431	323.746	29.4	44.3	2.1	297.6	59.1	2987														265.69	389.194			26.9361	1422.04			10.8525	16.0826
2019-12-31_05:00:00	2019-12-31 15:00:03	0.1	16.47	12.32	0.46	0	0	312.53	2.9	-4.25	39.38	5.14514	325.692	19.1	43.8	2.3	296	53.2	5064														45.9684	949.133			19.5364	1404.75			8.09484	15.6907
2019-12-31_06:00:00	2019-12-31 16:00:03	0.05	13.72	9.94	0.35	0	0	312.52	2.48	-4.03	39.37	4.73194	328.393	16.2	44	2.8	269	51.5	6928														39.1876	1302.34			21.4369	1419.03			3.73241	16.3859
2019-12-31_07:00:00	2019-12-31 17:00:03	0.01	11.76	8.2	0.28	0	0	312.21	2.08	-4.02	39.06	4.52623	332.642	10.7	44	3.5	267.6	74.3	6394														6.25	1877.32			24.4036	1395.77			1.05316	20.6319
2019-12-31_08:00:00	2019-12-31 18:00:03	0.02	26.19	21.25	1.04	0	0	310.96	0.47	-3.79	37.81	3.81903	352.931	15.7	39.2	4.4	196	231.8	4273														30.8025	638.977			1.9321	980.316			0.337525	22.4205
2019-12-31_09:00:00	2019-12-31 19:00:03	0.05	82.41	72.41	4.05	0.01	0	306.73	-0.54	-4.14	33.58	4.17507	7.43149		25.1	4.5	158.8	280.4	2600														5243.21	5243.21			71.9104	168.48			0.10558	26.9472
2019-12-31_10:00:00	2019-12-31 20:00:03	0.04	123.29	109.61	6.24	0.01	0.01	304.39	-0.12	-4	31.24	4.0018	1.71844		22.7	3.6	159.9	75	1179														12014.4	12014.4			72.9316	72.9316			0.161443	16.9563
2019-12-31_11:00:00	2019-12-31 21:00:03	0.02	116.01	102.72	5.76	0.01	0.01	301.12	-0.03	-2.83	27.97	2.83016	0.60743	30.3	21.2	2.9	161.5	50.6	1256														5244.66	5244.66			45.8329	45.8329			0.00487776	5.04523
2019-12-31_12:00:00	2019-12-31 22:00:03	0.1	70.43	49.24	2.15	0.01	0.02	300.04	-1.01	3.97	26.89	4.09646	165.726	29.3	21.1	2.1	169.3	46.6	1011														397.604	397.604			33.5241	33.5241			3.98586	7.35745
2019-12-31_13:00:00	2019-12-31 23:00:03	0.26	74.89	31.61	0.47	0	0.01	296.04	1.26	4.04	22.89	4.23193	197.322	28.4	20.7	2.4	168.5	53.6	1052														10.3041	10.3041			4.7961	4.7961			3.35595	9.90944
2019-12-31_14:00:00	2020-01-01 00:00:03	0.29	73.24	33.45	0.68	0	0.01	294.27	1.03	2.29	21.12	2.51098	204.217	16.8	20.4	2.2	182.6	31.1	755														277.223	277.223			0.5184	17.4724			0.096706	1.50547
2019-12-31_15:00:00	2020-01-01 01:00:03	0.33	69.9	34.9	0.89	0	0.01	293.13	0.98	1.92	19.98	2.15564	207.04	18.1	19.9	1.6	162.6	42.7	531														282.24	282.24			0.0064	33.8724			0.30874	0.30874
2019-12-31_16:00:00	2020-01-01 02:00:03	0.38	67.65	35.05	0.97	0	0.01	292.62	0.6	2.36	19.47	2.43508	194.264	9.9	19.7	2.1	180.8	34.4	412														632.522	632.522			0.0529	42.6409			0.112277	1.10476
2019-12-31_17:00:00	2020-01-01 03:00:03	0.42	65.99	33.7	0.9	0	0.01	291.44	0.22	1.96	18.29	1.97231	186.404	11.2	19.7	1.9	188.4	32.8	4178														506.25	506.25			1.9881	59.4441			0.00522849	0.150783
2019-12-31_18:00:00	2020-01-01 04:00:03	0.47	66.34	33.61	0.88	0.01	0.02	290.67	0.25	1.59	17.52	1.60953	188.936	12	19.7	2.3	194.1	39.7	5100														466.992	466.992			4.7524	71.9104			0.476743	0.476743
2019-12-31_19:00:00	2020-01-01 05:00:03	0.49	66.59	33.82	0.87	0.01	0.02	290.42	-0.01	0.3	17.27	0.300167	178.091	11.6	19.6	1.8	187.6	38.9	4838														493.728	493.728			5.4289	77.9689			2.2495	2.2495
2019-12-31_20:00:00	2020-01-01 06:00:03	0.48	66.76	34.12	0.88	0.01	0.02	292.06	-0.15	-0.14	18.91	0.205183	46.975	17.4	19.7	2.2	183.9	58.2	1289														279.558	279.558			0.6241	50.2681			3.9793	3.9793
2019-12-31_21:00:00	2020-01-01 07:00:03	0.47	64.29	32.58	0.8	0.01	0.02	293.79	-0.85	-0.42	20.64	0.948103	63.7053	15.9	19.9	1.3	151.9	63.6	1088														278.222	278.222			0.5476	26.6256			0.123831	1.52744
2019-12-31_22:00:00	2020-01-01 08:00:03	0.42	57.38	29.92	0.74	0	0.01	296.33	-1.24	-0.45	23.18	1.31913	70.0541	21	21	0.4	120.1	66.8	614														79.5664	127.871			4.7524	4.7524			0.844797	3.11477
2019-12-31_23:00:00	2020-01-01 09:00:03	0.36	50.22	26.82	0.67	0	0.01	299.59	-0.81	-0.89	26.44	1.20341	42.3058	27.3	22.5	0.5	66.4	67.6	467														0.2304	65.7397			15.5236	15.5236			0.494788	3.17049
2020-01-01_00:00:00	2020-01-01 10:00:03	0.25	38.36	21.48	0.57	0	0.01	303.45	-0.57	-2.12	30.3	2.19529	15.0492	27.5	24	1.1	59	64															36.2404	175.51			39.69	73.96			1.19966	1.19966
														21.3	25.6	1.7	51.6	59.7															2.39514e+06	3.61305e+06			30274.2	140254			2052.38	7295.55
														23.6	27.7	1.6	88	66.2
														24.8	30.4	1.9	107.7	69.1
														25.2	31.3	3.7	129.5	90.4
														38.8	29.4	3.7	127	99.6
														43.6	27.8	3.7	135.3	71.6
														31	26.3	3	125.1	40
														18	24.8	2.9	138.7	37.7
														10.9	23.3	2.4	133.4	41.6
														7	22.8	2.2	134.8	39.4
														10.7	22.5	2.6	162.4	36.1
														18.8	21.8	3.1	174.1	49.9
														24.6	21.4	2.7	171	49.5
														31.7	21.2	2.6	178.5	57.6
														30.1	20.2	2.7	182.7	38
														23.3	19.3	2.7	182.9	37.4
														27.9	19	1.6	177.5	49.2
														23.2	18.6	1.6	194.6	57.8
														30.6	18.6	1	190	64.4
														37.1	18.9	1	242.6	70.7
														41.8	19.4	1	256.8	86.5
														44	19.9	0.7	252.8	89.7
														42.9	20.9	1.5	227.1	84.5
														43.4	21.6	1.6	211.6	81.2
														44.5	22.5	0.7	220.1	91
														48.4	24.4	0.6	345.7	92.4
														51.5	26	0.9	41.2	85.5
														48.5	27.1	1.6	44.1	73.5
														35.1	28.6	1.5	61.2	48.9
														20.4	29.8	2.5	98.1	19.4
														17.4	27.8	3.8	123.7	25.6
														14.9	26	2.8	117.1	37.6
														14.3	24.2	2.1	110.7	34.1
														13.4	23.3	1.9	131.5	31.3
														12.7	22.8	1.7	126.3	25.1
														13.2	22.6	1.4	139.1	28.3
														12.9	22.6	0.9	148	33
														11.7	22.2	1	179.5	35.3
														15.2	21.4	2.6	231.4	36.4
														18.3	21.3	2.1	234	40.6
														16.9	21.2	1.7	223.4	45.8
														21.1	21	0.9	207.1	43.1
														21.7	21	0.7	245.1	47.4
														18.9	21.3	0.8	243.6	54.3
														24.3	22	1.1	232.8	53.4
														24.6	23	1	197.6
														21.7	24.6	0.8	225.1
														25	26.8	1.3	18.4	40.4
														22.1	28.3	1.8	41.2	42.8
														20.2	30.6	2.4	75.7	42.2
														16.2	32.3	3	88.2	39.3
														21.2	33.8	3	81.4	43.2
														22.1	35.2	2.9	66.7	43.6
														22.2	34.7	3.9	91.8	48.7
														18.1	32.2	3.8	90.7	42.1
														19.3	30.6	3.4	79.4	43.5
														30.1	28.8	2.6	78.8	47
														27.1	27.1	1.1	102.4	28.3
														18.1	25.8	0.5	142.2	36.5
														16.5	24.4	0.4	207.9	35.2
														13.6	23.3	0.7	206.1	38.6
														11.5	22.8	0.5	210.8	33.8
														13.1	21.9	0.6	210.4	32.3
														13	21.4	0.5	239.1	26.3
														10.9	20.7	0.4	204.9	25.9
														9.6	20.4	0.4	310.7	26.7
														15	19.9	0.1	279.1	29
														14.9	20.3	0.3	53.9	30.2
														7.3	23.2	0.9	39.7	33
														8	25.9	1	57.1	31.6
														7.9	29.1	0.9	57.8	47.6
														18.1	34.1	0.7	147.1	65.6
														37.6	39.8	0.7	54	69.2
														49	45	3.5	295.3	59.6
														47.9	45.6	3.8	286.2	54.4
														25	46.2	4.1	272.7	52.9
														14.8	46.5	3.6	285.4	52.7
														11.8	46.2	3.4	288.6	57.4
														13.7	45.6	2.1	318.4	60.6
														13.9	46	2.3	306	75.4
														16.8	44	1.6	324.5	79.2
														33.3	40.4	0.8	19.5	99.3
														38.6	35.5	0.8	82.1	96.4
															32.4	4.1	160.8	244.3
															28.1	4.7	175.1	205.8
														75.8	26.4	4.5	178.4	135.3
														65.7	25.1	2.7	168.1	99.7
														61.4	24.3	2.6	180.1	103.4
														110.7	23.8	3	196	258
														224.7	23.1	2.4	223.6	422.5
														300.6	21.7	0.4	169.8	415.7
														331.6	20.7	0.7	127.3	352.9
															23	1.8	147.3
														95.1	24.3	2.2	142.7	24.3
															24.6	2.2	135.7	43.6
															25.3	2.4	133.2	51.4
														-3.8	26.4	2.6	118.7	53.6
														4	27.1	2.9	126	56.3
														24.1	27.8	3	125.3	90.6
														74.1	27.5	3.7	121.9	226.1
														131.5	25.8	4.9	132.1	205.8
														103.4	23.2	4.7	147.9	149
														83.6	22	3.9	151.1	120.7
														66.6	21.5	3.9	162.1	85.4
														38.4	21.1	3.3	161.8	50.2
														21	20.8	2.7	158.9	44.6
														11.3	20.3	2.9	186	34.1
														13.6	20.5	2	174.7	30
														15	20.8	1.6	137	36.9
														13.6	20	0.8	133.5	43
														20.1	18.4	0.5	272.5	41.1
														15.5	18.2	0.2	296.9	41.1
														13	18.4	1.4	201.1	43.2
														12.7	18.4	1.1	227.2	41.4
														10	17.3	0.4	222.8	42.7
														8.8	16.8	0.6	191.6	43.6
														8.7	18.4	1.7	211.1	39.8
														9.5	19.9	1.6	239.6	37.6
														11.5	20.8	0.7	234.8	37.8
														10.4	21.8	0.6	65.4	41.8
														13.2	22.2	1.3	77.5	43.8
														9.1	22.3	1.5	77.3	45.2
														-1.5	22.7	1.9	93.6	43.2
														-2.8	23.6	2.2	70.3	29.4
														7.7	23.6	2.1	53.6	24.5
														10.9	23.4	2.1	60.7	27.7
														12.8	22.6	1.9	64.2	47.1
														10.9	20.6	0.9	96.6	45.8
														11.4	19.6	1.2	119.4	25.1
														11.3	19.4	0.6	200.7	20.2
														3.3	19.5	0.8	230.2	15.9
														4.9	19.7	0.5	259.9	14
														5.3	19.9	0.6	284.7	13.2
														8.6	19.9	1.1	276.9	12.7
														6.6	20	1.3	177.9	7
														5.9	19.9	0.8	259.6	10.4
														4.9	19.9	0.6	50.9	12.3
														3.3	20	0.5	148.5	14.1
														-2.3	19.9	0.3	285.9	14
														0.4	20.1	0.7	355.9	13.7
														5.7	20.7	1.7	49.3	15.2
														7.6	20.9	1.5	31.4	18.8
														4	22.5	2.7	29.5	10.6
														1.7	24.2	1.2	39.4	17.1
														5	28.4	2.8	29.7	9.3
														11.3	29.2	2.3	18.8	22.3
														18.9	29.7	2.4	53.9	26.9
														15.8	29.7	2.1	52.4	24.1
														9.4	30.2	2.4	58.2	22.2
														12	32.3	2.7	75.1	26.4
														15.8	33.3	2.1	66.6	29.7
														16.1	33.6	2	79.4	36.4
														14.7	31	2	121	49.1
														18.4	27.8	1.6	184.5	49.6
														27.7	26.9	2.4	190.2	43.9
														32.5	26.1	3.3	192.9	41.3
														24	24.9	5	193.7	57.3
														27.1	22.7	1.4	162	51
														24.5	22.1	2.6	226.7	35.4
														22.6	21.9	1.2	178.8	32.3
														22.6	22.1	1.1	191.2	34.8
														18.5	22.2	0.3	205.5	35.8
														20.2	22.2	0.3	281.9	38.6
														24.9	22.4	0.2	133.5	36.5
														23.4	22.9	1	83.5	40.8
														24.1	23.3	1.5	99.5	53.1
														36.1	23.3	1.6	106.6	72
														44	24	1.4	92.1	70.1
														52.6	24.8	1.6	110.5	94.7
														65.8	25.9	1.5	128.9	104.9
														78.3	26.9	2.2	112.8	104.5
														79.1	27.5	2.2	123.5	81.6
														69.7	27.7	2.6	129.8	98.5
														73.8	27.1	3	143.8	110.2
														80.3	25.8	2.7	137.9	124.9
														90.2	24.9	2.3	144.6	125.2
														95	24.2	2	149.6	117.7
														100.9	23.5	2.1	152.8	133.4
														101.3	22.9	1.4	160	88.9
														71.7	22.7	0.9	147.5	66
														57.7	21.9	1.3	206.9	64.4
														51	21.4	0.5	282.2	66.3
														52.2	21.4	0.8	226.7	70.2
														56.4	21.6	0.9	190.5	80.5
														68.3	21.6	0.8	180.2	92.4
														74.2	21.3	0.7	204.7	92.2
														80.3	21.3	0.6	180.6	85.5
														75.9	21.4	0.9	181.8	80
														62.5	21.5	1.2	180.5	57.4
														40.3	21.7	1.8	193.1	38.4
														23.5	22	1.4	184.7	28.9
														13.8	22.3	1.3	153.1	24.9
														7.3	22.3	1.4	159.9	15
														1.6	23.5	1.7	207.5	8.9
														1.3	24.5	1.5	167.2	5.1
														2.8	25.4	1.1	157.4	7.5
														3.4	25.5	1.7	128.6	10.8
														1.4	25.2	1.5	128	11.4
														3.1	24.9	1.9	121.5	9.1
														3.6	24.8	1.7	123.5	10.2
														4.7	24.2	1.9	115.5	7.8
														3	23.6	1.3	117.7	11.4
														3.2	23.3	0.9	125	12.5
														4.5	22.6	0.8	135.6	13.1
														3.7	21.8	1.7	246.9	10.9
														2.5	20.9	1.1	276.4	3.6
														2.7	20.8	0.7	276.4	2.1
														2.9	20.8	0.6	283.1	2.2
														0.7	21	0.2	319.3	1.9
														3.3	21	0.3	319.1	5.1
														12.1	21.3	0.6	11.5	10.1
														16.9	21.4	0.5	342.1	16.9
														9.6	21.7	0.6	323	20.6
														7.1	22.7	1.6	38.8	20.3
														7.5	24.9	2.3	49.6	15
														3.6	27.2	2.5	38.4	15.3
														10.8	29.2	2.5	56.9	20.8
														8.7	31.8	2.4	51	22.1
														12.7	34.3	2.4	52.9	34.5
														20.5	36.1	2.9	74	56.4
														24	37.9	3.2	92.4	67.1
														29.3	39.1	3.4	85.7	86.8
															36.8	3.9	86.7	68.8
														11.7	35.5	2.9	72.3	45.7
														13	33.6	1.7	80.9	48.6
														16.6	31.2	1	122.3	43.6
														20.5	29.3	0.3	245.1	43.5
														25.3	27.9	0.3	274.5	46.1
														20.9	26.7	0.3	282.8	45.1
														21.7	26	0.6	235.6	46.5
														18.6	27.6	0.9	191.6	34.8
														22.4	26.8	2.1	153.4	53.9
														32	24.2	1.9	132.3	104.7
														48.2	22.9	2.2	142	90
														68.7	21.9	2.6	144.8	190.3
														156.3	21	3.3	187.4	284.7
														187.8	20	0.3	306.2	232.3
														160.9	19.3	2.3	166.8	155.5
														75.7	18.7	2.8	169.7	5.5
														30.6	18.8	2.5	174	31.3
														26	19.1	3.2	189.8	33.7
														19	19.8	2.1	174.1	28.7
														23.2	20.5	1.7	163	32.4
														26.7	21.9	1.6	142.7	34.5
														22.9	22.1	1.6	94	40.7
														24.8	22.4	1.7	103.3	52.2
														38.6	22	2.1	114.5	74.2
														43.6	21.4	2.2	126.4	65.8
														37.7	21.1	1.6	117.3	65.8
														35.3	20.9	1.2	127.7	51.9
														29.3	20.8	0.9	155.9	50.2
														26.8	20.6	0.9	187.7	46.9
														25.3	19.8	0.5	184.2	49.2
														22.7	18.5	1.2	170.8	37
														17.9	17.7	1.4	194.1	33
														13.6	17.5	1.4	206.4	27.1
														12.6	17.3	1.4	195.5	20.9
														20	16.6	2	237.2	23
														19.5	16.6	0.7	278.3	27.5
														19.2	16.8	0.5	268	30.6
														18.2	18	1.2	232.7	37.4
														26.3	19.8	0.9	219.1	56.9
														37.2	20	1.4	171.2	59.3
														35.6	19.9	1.8	184	55.3
														33.4	21.3	0.7	157.8	59.8
														48.5	21.3	2.4	135.3	124.2
														73	21.6	3.2	123.1	130.9
														90.7	19.9	2.7	135.8	112.8
														82.9	18.9	2.6	145.3	81.3
														64.3	18	1.9	177.4	63.6
														48.3	18	1.3	218.7	62.5
														46.3	17.9	0.7	172.4	73.1
														55	16.9	1.3	218.6	75.4
														54.5	16.6	2.1	229.9	80.3
														60.7	16.4	1	247.5	75.1
														63.5	16.5	0.7	240.6	71.8
														57.9	16.7	0.7	251.2	63.5
														51	16.8	1.6	223.4	52.8
														43.2	16.8	1.7	213.2	48
														37.3	16.6	1.6	205.5	41.5
														32.6	16.6	1.7	206.5	35.2
														31.6	16.7	1.8	208.3	34.4
														34.2	16.5	1.7	214.2	41.2
														36.9	16.6	1.8	215.4	49.8
														47.5	17.2	1.3	214.8	64.5
														56.8	18.2	0.9	217.2	78.1
														61.4	19.7	1.6	221.3	88.2
														53.3	22.1	0.7	126.2	57.5
														42.7	23.6	1.3	6.4	40.1
														33.7	24.2	0.6	85.6	42.9
														30.3	25.3	0.9	159.9	31.4
														25.2	25.4	2.1	104.1	29.3
														12.3	25.7	2.6	70.3	12.2
														8.7	26.4	2.1	87.1	19.7
														11.8	25.6	2.9	98.4	13.7
														9.1	24.9	3	85.1	20.4
														5.6	23.6	3	88.8	37.2
														1.7	22.5	2.5	81.1	11.8
														11	21.9	1.6	72.6	17.4
														10.7	21.4	1.2	83.1	15.6
														3.8	20.5	0.6	110.6	12.9
														6.5	19.3	0.4	174.6	11
														3.9	19	0.2	191.4	10.9
														3	18.8	0.2	266	10.6
														1.7	18.7	0.5	198.9	9.9
														4.9	17.9	0.1	17.9	7.7
														4.5	16.8	0.2	101.3	7.1
														2.2	17.1	0.2	305.8	20.3
														-2.1	18.8	0.7	277.9	8.6
														-2.3	21.4	0.8	190.3	16.1
														1.3	23.7	0.8	87.8	20.4
														7.2	24.7	1.8	44.1	15.8
														10.7	26.5	1.9	45.3	22.9
														14.2	28.2	1.7	73.6	26
														17.8	29.5	1.4	85.4	34.2
														27.2	29.8	2.4	92.2	53.9
														20.2	29.7	3.2	94.6	35.5
														14.9	29.4	3.2	93.7	23.5
														14.6	28.3	3.6	85	23.4
														16.3	26.5	3.7	87.8	8.2
														19	25.1	3.1	95.4	29.7
														11.9	23.7	2.2	108.1	29.2
														5.9	22.8	1.9	105.5	20
														3.5	22.4	1.8	102.7	9.2
														1.3	21.1	0.7	119.9	8.8
														5.6	19.6	0.4	147.9	4.1
														4.9	18.6	0.3	259.2	8.5
														2.5	18	0.4	267	2.6
														1.8	17	0.3	217.9	0.2
														3.4	16.4	0.3	275.4	2.5
														5.9	16	0.2	284.8	3
														8.1	15.5	0.1	224.1	9
														0.2	17	0.2	202.8	38.3
														-9.4	20.1	0.4	310	0.5
														-1.8	22.4	0.8	62.8	9.9
														-0.2	23.9	1.4	28.2	7.7
														4.6	25.6	2	66.4	21.2
														6.5	27.2	2.2	72.5	13.7
														3.1	28.7	2.6	73.2	18.6
														7.3	30	2.5	76.6	21.3
														14.4	31	2.7	81.1	26.6
														15.6	29.8	3.5	69.4	38
														8	28.5	3.5	71.2	24
														2.9	27.4	3.3	76.3	26.1
														1.1	26.9	2.9	71.2	24.6
														3.2	25.4	2	79.5	20.8
														11.4	24.3	0.5	112.2	15
														10.2	22.9	0.5	229.3	10.6
														5.9	22.6	0.3	189.6	10.6
														4.5	21.9	0.2	220.9	9.4
														6.2	21.2	0.3	272.7	9
														3.8	20.8	0.6	200.6	11.6
														4.5	21.1	0.4	214.7	12.6
														3.8	21.1	0.5	221.8	12.6
														10.8	21.9	1.8	223	21.2
														15.6	20.5	1.9	215.9	27.1
														23.4	20.5	1.1	222.1	61
														25	21.2	0.5	259	48.1
														26.9	21.5	0.5	1.3	43.3
														24.9	21.4	0.9	12.1	49
														25	22.4	1.2	52.3	42.1
														23	23.6	0.7	141.6	43.4
														17.7	25.5	0.5	18.4	8.4
														16.5	26.9	1.7	46.2	14.8
														16.8	29.1	2.1	27.5	-9.7
														16.5	29.8	2.8	43.9	20.9
														12	29.5	3	69.8	10.7
														11.8	26.2	4.3	179.3	35.2
														19.1	20.1	3.2	215.3	32.5
														13.2	19.4	1.4	266.8	16.4
														4.8	19.3	1.6	252.8	14.3
														3.4	19.5	1.4	281.4	9.2
														6.6	19.3	0.3	307.1	6.2
														7.5	19.4	0.8	72.8	15.1
														10.2	19.2	0.6	167.6	13.7
														6	19.3	1	250	19.2
														6.5	19.6	1	232.8	20.9
														10.6	20.1	1.4	210.8	28
														16.2	20.7	2.9	194.3	23.6
														20.8	20.7	3	195.2	8.4
														15.7	20.7	3.5	191.1	6.8
														9.7	20.8	3.5	179.9	3.8
														10.6	19.9	3.7	188.9	11.3
														7.6	19.3	3.4	195.6	20.2
														13.8	19.3	3.4	190.9	31.5
														23.2	19.7	2.8	192	52
														23.6	20.5	4.2	190.5	49.1
														31.3	20.3	3.1	193.6	56
														36.9	21.1	2.9	188.1	53.3
														44.1	21.5	2.9	182.5	57.8
														41.7	21.6	2.8	188.2	52.7
														37.2	21.7	1.7	172.2	52.4
														38.4	21.6	0.8	193	61.3
														37.5	21.4	0.9	192.2	53.2
														29.8	21.2	0.7	201.6	57.5
														35	21.2	0.8	176	55.2
														40	21	1.4	205.7	60.7
														45.8	20.7	2.5	216.5	49.7
														39	20.7	2.1	208	38
														27.5	20.5	2.5	203.3	33.2
														18.3	20.1	2.3	215.3	16.8
														13.1	20.5	2.4	213.1	14.2
														14.5	20.8	2.9	204.5	17.9
														17.1	20.7	3.1	200.5	19.4
														19.9	20.7	3	204.7	23.9
														18.1	21.4	3.6	199.3	18.9
														12.7	21.9	3.6	205.4	10.2
														7.2	22.3	4	198.2	13.3
														10	22.1	3.1	196.1	19
														6.8	21.7	2.1	202.9	22
														2.1	22.1	1.7	221	10.1
														3.4	22.9	2.4	195.1	5.7
														8.4	23.5	2.6	200.6	17.9
														13.8	23.3	2	195.3	15.8
														15	23.4	2.6	180.6	17.3
														18.8	22.8	1.7	171.9	25.1
														15.3	21.1	0.4	160.5	39.1
														11.8	20.5	0.8	192.2	15.8
														17.6	20	0.7	212.7	21
														18.9	19.1	0.4	246.7	17.8
														13.7	19	0.4	306.9	22.3
														10.6	19.3	0.5	282	22.1
														13.9	19.1	0.4	326.7	17.9
														12.7	19	0.1	296.1	14.5
														13.1	18.9	0.1	138.2	17.2
														9.2	18.8	0.4	270.5	16.2
														9.3	18.5	0.7	242.2	15.3
														11.4	18.5	0.2	222	19.3
														8.7	18.9	0.5	249.7	20.1
														6.3	19.4	0.8	245.7	15.3
														5	21	1	208.1	0.1
														7.1	21	1.5	235.4	20.3
														7.3	20.5	1.9	235.6	19.2
														5	20.7	2.3	220	12.5
														2	21.7	2.3	218.5	4
														5.5	22.8	2.5	218.3	-1.3
														4.6	23.6	2	191.1	6.5
														6.1	22	1.4	131.8	7.8
														4.1	23.2	0.4	167.6	-0.7
														3.6	23.3	1	257.8	12.9
														4.1	22.9	0.9	265.7	10.5
														5	21.9	0.5	289.9	12.1
														2.7	21.5	0.6	276.5	10.9
														2.7	21.5	0.4	308.3	11.6
														4.3	20.9	0.2	282.2	14.6
														6.5	20.7	0.6	66	6.8
														0.8	20.7	1	51.5	8.3
														4	20.6	0.4	290.4	12.3
														6.6	20.3	1.2	69.9	11.7
														4.3	19.9	0.1	22.4	1.5
														5.8	19.1	0.5	106.6	7.5
														5.6	18.7	0.6	195.4	19.3
														3.8	19.8	0.5	164.4	34.6
														0.7	20.6	0.7	210.1	8.5
														1.3	22.2	0.9	199	13
														5.6	23.8	1.3	233.3	18.9
														6.6	25.7	0.9	220	21.4
														6.9	28.4	1.4	51	21.4
														9.7	30.6	1.9	46.9	12.4
														9.8	31.5	1.4	352.8	34.4
														8.9	32.5	1.9	70	17.3
														7.9	30.5	2.8	163.8	31.9
														10.6	27.9	6.8	188.8	-7.2
														16.1	27	4.3	179.9	9.3
														12.5	26.6	2	195.2	31.8
														14.4	24.7	0.4	90.1	40.6
														10.8	23	0.6	60.6	28.3
														14	21.1	0.7	296.2	28.7
														11.5	19.9	0.4	257.9	25
														9.7	19.3	0.3	287.3	25.6
														8	18.9	0.3	26	16.4
														8.6	18.5	0.4	30	24
														8.4	18	0.6	67.3	25.8
														11.1	17.3	0.2	211.3	8.2
														11.1	16.3	0.3	254.1	4.7
														10.7	16	0.4	281.5	31.8
														6.5	18.7	0.1	18.4	43.1
														7.2	23.5	0.8	2.9	22.4
														15.2	26.6	1.4	309.4	11.9
														20.1	28.6	1.8	238.5	8.8
														15.4	30.1	2.1	282.7	5.4
														13.2	31.4	2.6	265.8	9.1
														13.7	32.6	2.6	261.3	2.3
														8.8	33	2.4	229	9.6
														6.7	33.4	1.7	159.1	19.3
															32	2.6	106.7	30.4
														-4.9	29.6	3.3	88	13.3
														-3.2	27.9	3.2	76.9	17.8
														-0.4	26.4	2	89	20.2
														-6	24.5	1.4	84.8	22.9
														-4.5	22.8	0.6	77.1	19.5
														1.8	21.1	0.4	270.5	19.3
														3.7	20.1	0.6	246.5	17.4
														2.7	19.3	0.4	238.8	12.8
														6.3	18.8	0.5	280.5	11.4
														2	18.5	0.5	279.2	7.5
														2.1	18	0	30.7	8.6
														3.6	17.2	0.3	284.9	9.1
														7	16.9	0.3	34.4	7.5
														7.9	16.6	0.1	225.6	15.8
														1.5	19.5	0.3	169.1	25.2
														-1.2	22.4	1	92.9	12.4
														-0.2	24.9	1.5	64.7	26.1
														1.3	26.7	2.1	65.4	33.1
														2.7	29.4	2.2	58.9	29.2
														7.4	31.8	2.5	86.1	11.5
														13.8	33.8	2.9	84.1	4.1
														23.7	35.4	3.6	80	7
															35.2	4.5	83.7	99.3
															33.5	4.6	96.2	55.5
														-8.3	32.7	4	88	39.5
														5.6	32	3	94.4	22.4
														13.2	30.7	2.3	81.9	12.9
														22.6	28.5	1.2	80.8	36.9
														14.6	25.6	0.5	135.6	41.7
														7.5	23.6	0.5	253.6	32.5
														6.9	22.5	0.4	283.1	34.9
														8.8	20.8	0.2	265.8	28.8
														9.4	19.8	0.1	290.5	23.2
														10.9	19	0.1	65.3	29.9
														7.9	18	0.2	324.7	21.7
														6.9	17.5	0.1	192.5	17.7
														11.7	17.1	0.2	22.2	19.3
														10.4	16.9	0.3	331.7	33.4
														4.4	21.3	0.8	5.1	31.3
														1.4	28	0.7	36.3	37.8
														10.5	33.8	4.1	327.4	40.8
														20.3	36.2	5.1	329.9	37.9
														20.7	38.4	4.9	331.9	24.6
														22.2	40.3	6.5	324.4	37.3
														22.3	40.5	6.1	331	82.1
														19.7	41.3	6.1	328	130.1
														25.7	41.2	5.1	326.1	246.6
														43.9	41	5	323.2	420.6
														58.7	40.9	4.3	325.1	580.9
														68.4	39.2	3.3	248.7	789.5
														97.4	37.4	2	230.6	905.7
														104.2	35.3	0.3	151.1	730.4
															34.4	1.4	30.3	756.8
															33.2	4	21.2	512.5
															31	3.6	7.1	98.7
														21.3	32.2	3	326.9	96.1
														24.6	31.9	2.6	315.7	100.3
														21.4	29.4	1.6	4.1	87.1
														12.4	30	1.3	262.4	65.7
														17.2	28.2	1.8	193.6	73.6
														20.4	26.5	1.3	171.7	82.6
														29.1	25.7	1.8	112.6	153.1
														44.4	24.9	2.2	118	136.4
														56.8	21.1	2.3	195.2	134.7
														47.7	20.2	1	289.5	78.6
														34	21.4	1.1	261.4	63.9
														36.7	23.4	1	186.6	83.4
														40.7	23.9	2	200.2	86.1
														36.6	24.5	0.9	132.3	94.9
														36.1	26.1	0.8	15.1	85.3
														38.3	27.3	2.1	43	95.6
														39.6	28.5	2.3	82.6	115.2
														44.4	28.6	2.6	86.8	114.2
														47.9	27.4	2.8	98.3	86.5
														37.1	26.1	2.4	98.2	109.6
														21.9	25.1	2.4	85.3	72.5
														17	24.7	1.5	108.1	64.8
														18.2	24.6	1.3	119.9	68.5
														17	23.6	1.4	160.6	53.6
														13.8	22.8	1.4	170.5	43.3
														12.3	22.4	0.4	86.8	29.3
														10.8	22.2	0.7	209.7	29.2
														9.8	22	1.2	231.2	25.2
														5.7	21.9	0.9	227.8	30.5
														10	22	1.1	215.5	36.1
														11.3	22	1.1	195.6	41.6
														11.3	22.1	1	202	49.2
														13	22.8	1.1	220.4	54.4
														9.1	24.6	0.4	337	62.2
														11.3	25.4	1.2	255	70.4
														15.1	26.3	1.3	251.5	68.6
														16.4	27.7	0.9	280.1	67.4
														18	27.6	1.7	236.1	78.2
														16.2	28.5	0	85.3	71.8
														15.3	29.3	1.4	42.2	80.1
														15.7	29.8	2.1	67.6	82.6
														11.7	28.9	3	79.1	36.2
														7.9	28	2.2	93.4	19.6
														5.9	27.3	2.2	72.8	18
														6	26.1	1.3	80.2	20.6
														16.6	25.6	0.8	79.5	21.6
														16.9	24.8	0.4	198.9	17.5
														10.4	24.1	0.2	126.1	18.2
														6.8	23.6	0.4	204.2	11.6
														7.8	23	0	150.5	13.7
														6.9	23.5	0.5	30.7	28.9
														0.6	23.6	0.5	240.9	14.9
														6.7	23.6	0.5	219.1	13.7
														14.6	23.4	0.3	97.4	18.4
														9.6	23.4	0.2	265.3	24
														5.6	25.2	0.5	108.7	17.9
														5.1	26.9	1.4	76.7	25.5
														5.7	29.1	1.4	35.4	14.7
														10.9	31.6	0.4	158.1	16
														13.2	33.6	0.6	256.5	9
														14.2	35.5	1.1	338.6	18.7
														12.8	36.6	1.2	319.5	28
														11.6	35.5	2.8	24.2	57.6
														8.2	34.4	3.4	25.2	9.5
														7.9	33.5	3.1	57.7	59.7
														6.7	33.5	3.3	45.4	42.6
														17.3	31.9	3.5	32.2	8
														13	30.2	3	28.9	18.7
														12.8	28.4	1.8	11.2	2.4
														17	27.5	2.1	59.4	8.5
														15	27	1.6	24.1	10.2
														8	26.1	1	98.3	12.5
														6.2	25.4	1.5	182.9	8.7
														5.6	25.5	1.6	183.7	41.5
														21.7	25.3	2.3	174.5	70.9
														42.2	24.8	2.8	187.6	74.2
														47.6	24.7	2.9	192.6	69.2
														37.3	24.5	1.8	202.6	69.4
														33.3	24.4	1.4	191.1	68.4
														31.7	24.6	2.1	190.8	64.4
														27.8	25.1	2.2	193.6	62.6
														23.5	26.8	2.1	210	49.7
														21.8	27.9	0.6	160.5	44.7
														19.8	29.5	1.7	67.3	44.1
														19.3	30.3	2.6	63.5	47.5
														16.1	31.1	2.1	67.3	33.6
														21.6	32.2	2.5	48.7	33
														17.1	33	1.9	49.8	24.6
														16.7	33	2.6	67	40.7
														16.4	32.5	3.1	80.6	34
														14.4	31.1	2.6	85.8	38.9
														14	28.8	2.8	64.9	33.9
														13.8	27.1	2.1	85.4	26
														22.3	26.2	1.2	88.4	28.7
														19.2	25.5	0.4	144.7	26.9
														15.8	24.5	0.8	202.1	30.6
														14.4	24.6	1.1	186.1	28.5
														15.6	24.8	1.3	201.5	27.8
														10.2	24.9	1.5	182.5	17.7
														9.4	24.5	1.1	173.7	21
														8.1	24	1	190.7	22.4
														10.8	23.9	1.1	161.2	24.7
														11.3	23.9	1.3	180.3	25.9
														8	24.2	1.5	199.1	24.9
														9.9	25	1.3	210	28.1
														10.2	26.5	1.1	202.6	30.8
														14.9	27.7	0.9	223.7	34.7
														16.1	29.7	0.5	339.5	41.5
														15.2	31.4	1.5	45.8	44.1
														19.7	33	1.6	91.2	41.6
														14.7	35.2	1.2	103.2	30.1
														16.2	36.2	1	195.7	33.3
														15.9	37.2	2	132.5	73
														14.4	32.7	3.4	68.3	36.6
														15.9	30	2.3	139	14.7
														19.2	27.3	3.6	165	35.6
														20.1	26.2	3	172.5	36.3
														8.9	25.7	2.8	163.5	15.3
														9.1	25.5	2	159.5	29.5
														17.1	23.3	1.8	184.5	40.9
														11.6	22.7	2.4	217.4	15.3
														8.5	22.5	1.7	215.5	13.1
														6.4	22.6	1	254.3	18.5
														8.8	22.7	0.6	238	19.6
														6.3	22.9	0.9	220.7	10.3
														-2.5	22.9	0.9	207.2	14.4
														1.4	22.9	1.1	171.7	20.3
														11.2	23	1.1	149.8	22.6
														21.5	23.4	1.3	171.7	36.1
														30.3	23.8	1.3	197.9	49.9
														28.6	24.9	1.2	160.9	56.1
														27.7	26.5	1	100.4	55
														29.2	27.8	1.2	77.9	52
														27.8	29	1.8	77.3	42.8
														26.2	29	2.2	94.1	41.6
														21.6	29.2	2.7	111.9	42.6
														22.1	28.7	2.7	116.5	45.1
														21.3	27.8	2.9	123.1	46.2
														26.4	26.4	2.9	120.7	44.3
														25.2	25.4	2.3	93.4	34.6
														20.6	24.6	2.1	74.9	28.1
														18.9	24.2	1.9	82.8	26.8
														17.3	23.6	1.4	85	18.7
														14	23.1	1	83.2	14.3
														11.2	22.3	0.5	93	23
														12.5	20.9	0.2	14.9	21.9
														13.8	20.1	0.2	162.3	21.7
														11.1	19.8	0.3	175.7	18.7
														11.3	19	0.2	60.3	17.9
														10.8	18	0.5	83.5	7.3
														11.3	17.5	0.4	63.8	17.9
														8.7	18.8	0.2	190.3	58.4
														0.9	22.4	0.5	24.1	13.4
														8.4	24.2	1.4	44.9	18.8
														13.8	25.4	2.2	45.2	20.6
														15.8	27	2.2	37.4	26.8
														15.1	28.5	1.9	35.3	27.4
														12	29.8	2.3	64.9	34
														16.5	31.7	2.5	69.3	27.5
														22.8	33	2.5	70.8	36.1
														24.6	33.4	2.8	78.1	62.6
														19	32.4	3.4	74.7	60.9
														17.1	31	3.2	78.4	42.7
														14.2	28.9	2.8	81	35.7
														13.5	26.7	2.2	79.3	30.6
														17.2	25.3	1.5	76.7	31.4
														19.1	24.5	1.2	76.5	24.5
														12.7	23.6	0.5	88.2	19
														11.6	22.2	0.3	175.3	17.2
														11.9	21.5	0.5	199.2	10.4
														11.6	20.8	0.6	228.9	12.9
														7.9	20.6	0.3	214.5	9.5
														8.1	20.2	0.3	291.5	14.7
														3.7	20.8	0.4	288.9	32.9
														2.6	21.3	0.4	222.9	32
														5	22.2	0.3	253.8	41.2
														8.5	23.2	0.7	79.1	16.8
														14.4	23.8	0.8	54.2	33
														15.3	25.5	0.9	93.1	42.5
														16	28.8	0.9	84.6	39.3
														11.8	32	0.8	60.8	25.2
														14.1	35.1	1.2	105.6	27.4
														19.7	38	1.8	73.7	7
														16.9	40.4	2	61.4	27.2
														14.9	40.5	3.4	70.1	60.8
														17	39.6	3.6	74.4	41.3
														14.8	37.2	3.5	74.6	42.1
														14.2	34.2	2.8	77.3	19.6
														14.2	31.4	1.3	108	26.9
														10	29.6	0.7	177.7	27.2
														13	28.1	1	213.4	27.9
														11.1	27	0.7	201.2	32.7
														8.6	25.8	0.6	202.9	32.6
