# Supplementary material for: Black Carbon Emission, Transport and Effect on Radiation Forcing Modelling During the Summer 2019–2020 Wildfires in Southeast Australia
Source: Preprints.org preprint supplement (doi:10.20944/preprints202302.0293.v1), 2023-02-17
Supplement: Supplementary file 7 [file dec_2019_1350.xlsx]

## Sheet: dec_2019_1350
Date_time	Datetime (AEST)	dust_1	PM10	PM2.5	BC	NO2	NO	Temp2m	U	V	Temp2m(C)	Wsp(pred)	Wdr(pred)	PM2.5 (obs)	Temperature(obs)	Wsp(obs)	Wdr(obs)	PM10 (obs)	BC_obs (nanograms/m3)	Date	PM2.5_avg	PM2.5_avg_obs	BC_avg	BC_avg_obs(nanograms/m3)	BC_avg_obs(micrograms/m3)	BC_avg_obs (micrograms/m3)	BC_avg_obs(nanograms/m3)			PM25_cor	PM25_IOA	PM25(P-O)^2	(P-O)+(O-O)^2	PM25_Obs_avg		PM25(P-O)^2	(P-O)+(O-O)^2	PM25_Obs_avg		Temp(P-O)^2	(P-O)+(O-O)^2	Temp_Obs_avg		Wsp(P-O)^2	(P-O)+(O-O)^2	Wsp_Obs_avg
2019-12-01_00:00:00	2019-12-01 10:00:00	0	0	0	0	0	0	293.2	4.61	-3.42	20.05	5.74008	306.57	6.1	17.7	4.5	300.4	23.5	126	2019-12-01	0.015	12.5643	0.00142857	220	0.22	0.24875	248.75			0.246776	0.35946	157.485	7960.34	50.9055		37.21	9920.16	52.8459		5.5225	17.8929	1007.42		1.53779	29.5945	2.39919
2019-12-01_01:00:00	2019-12-01 11:00:00	0	0	0	0	0	0	293.75	8.17	-5.86	20.6	10.0543	305.65	6.1	17.4	3.8	289.3	14.1	114	2019-12-02	6.01958	14.6333	0.000833333	267.167	0.267167	0.307348	307.348			0.465365	0.459686	74.1967	6584.85			37.21	9920.16			10.24	15.8404			39.116	81.9799
2019-12-01_02:00:00	2019-12-01 12:00:00	0	0	0	0	0	0	294.91	9.18	-5.22	21.76	10.5603	299.624	13.3	19.5	4.9	292.2	40.5	130	2019-12-03	7.05292	12.5125	0.0204167	337.958	0.337958	0.2615	261.5					29.8071	6762.53			176.89	8537.76			5.1076	5.1076			32.0395	113.643
2019-12-01_03:00:00	2019-12-01 13:00:00	0	0	0	0	0	0	295.62	10.8	-5.49	22.47	12.1153	296.946	18.6	20.9	5.4	296.7	76.8	123	2019-12-04	4.31583	3.24167	0.00541667	200.667	0.200667	0.279042	279.042			Temp_cor	Temp_IOA	1.15383	8881.65			345.96	7586.41			2.4649	2.4649			45.095	161.678
2019-12-01_04:00:00	2019-12-01 14:00:00	0	0	0	0	0	0	295.12	11.29	-5.06	21.97	12.3721	294.141	20.3	21.6	6	294.1	85.9	118	2019-12-05	2.78708	3.90833	0.0104167	314.667	0.314667	0.300542	300.542			0.855141	0.793898	1.2572	9044.88			412.09	7293.16			0.1369	2.5281			40.6031	184.201
2019-12-01_05:00:00	2019-12-01 15:00:00	0	0	0	0	0	0	294.78	10.91	-4.28	21.63	11.7195	291.42	20.6	21.7	6.2	291.8	90.3	161	2019-12-06	32.4742	8.24583	2.00542	468.583	0.468583	0.45025	450.25					587.012	3730.77			424.36	7242.01			0.0049	1.8225			30.4648	172.121
2019-12-01_06:00:00	2019-12-01 16:00:00	0	0	0	0	0	0	294.21	11.08	-3.97	21.06	11.7698	289.713	18.8	19.6	5.5	301	89.1	190	2019-12-07	19.67	20.4417	1.185	271.5	0.2715	1.34154	1341.54			Wsp_cor	Wsp_IOA	0.595469	3805.45			353.44	7551.61			2.1316	2.1316			39.3099	155.495
2019-12-01_07:00:00	2019-12-01 17:00:00	0	0	0	0	0	0	293.46	11.23	-3.61	20.31	11.796	287.821	17.4	19.9	5.2	298.4	63.5	217	2019-12-08	12.8229	274.3	0.771667	11763.3	11.7633	13.8824	13882.4			0.584696	0.568288	68370.3	68370.3			302.76	7796.89			0.1681	3.1329			43.5069	148.742
2019-12-01_08:00:00	2019-12-01 18:00:00	0	0	0	0	0	0	292.55	10.78	-2.93	19.4	11.1711	285.206	12.7	20.4	5.8	297.3	56	246	2019-12-09	15.6179	115.025	0.88125	7518.88	7.51888	3.7147	3714.7					9881.77	9881.77			161.29	8649			1	4.7524			28.8486	148.135
2019-12-01_09:00:00	2019-12-01 19:00:00	0	0	0	0	0	0	291.04	9.37	-2.14	17.89	9.61127	282.865	8.6	19.4	5.5	288.1	47.7	370	2019-12-10	23.3633	95.4417	0.703333	4415.21	4.41521	3.67025	3670.25			BC_cor		5195.29	5195.29			73.96	9428.41			2.2801	21.9961			16.9025	106.322
2019-12-01_10:00:00	2019-12-01 20:00:00	0	0	0	0	0	0	290.04	8.68	-2.05	16.89	8.91879	283.288	8.2	18.2	4.5	295.6	29	228	2019-12-11	29.6617	23.2667	0.837083	1619.29	1.61929	0.831292	831.292			0.411685		40.896	2388.44			67.24	9506.25			1.7161	47.4721			19.5257	74.2836
2019-12-01_11:00:00	2019-12-01 21:00:00	0	0.01	0.01	0	0	0	288.75	7.56	-3.55	15.6	8.35201	295.154	6.1	16.7	3.6	304.9	25	293	2019-12-12	16.2437	25.8333	0.2225	627.792	0.627792	0.879208	879.208					91.9601	3566.83			37.0881	9918.17			1.21	93.7024			22.5816	51.1513
2019-12-01_12:00:00	2019-12-01 22:00:00	0	0.11	0.1	0.01	0	0	287.62	7.83	-4.57	14.47	9.06608	300.27	9.4	15.6	4.1	295.3	33.1	422	2019-12-13	14.4938	21.3375	0.128333	680.083	0.680083	0.385625	385.625					46.8369	4351.88			86.49	9254.44			1.2769	141.848			24.6619	69.9913
2019-12-01_13:00:00	2019-12-01 23:00:00	0	0.1	0.1	0.01	0	0	287.72	9	-3.79	14.57	9.76545	292.837	9.7	15.3	4.7	296	34.6	342	2019-12-14	9.89	17.4667	0.132083	456.042	0.456042	0.583542	583.542					57.4059	5541.81			92.16	9196.81			0.5329	146.652			25.6588	93.421
2019-12-01_14:00:00	2019-12-02 00:00:00	0	0.1	0.09	0.01	0	0	287.02	8.72	-3.14	13.87	9.26812	289.804	11.2	15	5	301	41.1	387	2019-12-15	9.86167	27.2417	0.515833	775.042	0.775042	0.863833	863.833					302.064	4185.66			123.432	8913.25			1.2769	171.872			18.2168	89.6452
2019-12-01_15:00:00	2019-12-02 01:00:00	0	0.1	0.09	0.01	0	0	285.87	8.16	-2.26	12.72	8.46718	285.481	10.4	14.3	4.5	299.6	44.5	516	2019-12-16	11.3229	47.1583	0.602083	771.833	0.771833	1.82639	1826.39					1284.18	1876.51			106.296	9064.94			2.4964	223.802			15.7385	66.7029
2019-12-01_16:00:00	2019-12-02 02:00:00	0	0.09	0.08	0	0	0	284.66	7.07	-2.01	11.51	7.35017	285.87	9.2	13.9	4.1	292.1	38.2	380	2019-12-17	22.305	108.008	1.06458	2822.58	2.82258	2.44192	2441.92					7345.06	7345.06			83.1744	9296.82			5.7121	274.565			10.5636	44.2248
2019-12-01_17:00:00	2019-12-02 03:00:00	0	0.06	0.05	0	0	0	284.05	6.41	-2.68	10.9	6.9477	292.69	8.6	13.7	4.3	298.8	32.4	307	2019-12-18	17.8996	135.367	0.9175	2009.12	2.00913	3.08725	3087.25					13798.5	13798.5			73.1025	9418.7			7.84	302.064			7.0103	41.5728
2019-12-01_18:00:00	2019-12-02 04:00:00	0.01	0.22	0.03	0	0	0	284.3	6.92	-3.54	11.15	7.7729	297.093	8	14.1	4.6	296.4	31.4	160	2019-12-19	20.7017	94.8708	1.0875	3439.67	3.43967	2.86442	2864.42					5501.07	5501.07			63.5209	9539.43			8.7025	279.893			10.0673	57.3488
2019-12-01_19:00:00	2019-12-02 05:00:00	0.04	1.02	0.06	0	0	0	284.2	7.94	-3.32	11.05	8.60616	292.692	11.2	13.8	4.9	294.3	41.9	153	2019-12-20	39.34	165.554	2.01792	4235.42	4.23542	4.91733	4917.33					15930	15930			124.1	8918.91			7.5625	293.437			13.7356	75.7972
2019-12-01_20:00:00	2019-12-02 06:00:00	0.06	1.57	0.09	0	0	0	285.51	9.35	-3.16	12.36	9.86955	288.674	9.8	14.1	5.2	291.9	47.2	321	2019-12-21	24.9425	93.225	0.929583	3744.25	3.74425	2.96454	2964.54					4662.5	4662.5			94.2841	9179.56			3.0276	240.87			21.8047	105.464
2019-12-01_21:00:00	2019-12-02 07:00:00	2.05	18.15	2.95	0	0	0	286.37	12.21	-3.34	13.22	12.6586	285.299	14.8	14.1	5.7	281.9	78.9	226	2019-12-22	13.6725	140.104	0.544167	4190.58	4.19058	3.51683	3516.83					15985	15985			140.423	7735.2			0.7744	214.916			48.4219	183.835
2019-12-01_22:00:00	2019-12-02 08:00:00	5.96	43.76	8.52	0	0	0	287.17	12.49	-3.7	14.02	13.0265	286.501	13	15.1	7.8	285.9	94.8	196	2019-12-23	7.28667	54.2958	0.3225	1209.92	1.20992	1.38896	1388.96					2209.86	2209.86			20.0704	7086.27			1.1664	165.38			27.3165	256.849
2019-12-01_23:00:00	2019-12-02 09:00:00	9.8	69.01	13.96	0	0	0	288.01	13.08	-4.11	14.86	13.7105	287.444	14.8	16.1	8	287.7	111.7	244	2019-12-24	2.9075	27.9083	0.0975	1375.5	1.3755	0.745667	745.667					625.042	5038.75			0.7056	5919.76			1.5376	121.44			32.6101	285.966
2019-12-02_00:00:00	2019-12-02 10:00:00	20.06	137.61	28.48	0	0	0	288.52	13.62	-4.28	15.37	14.2767	287.445	16	15.7	7.5	284.5	127.4	257	2019-12-25	3.285	9.52917	0.035	414.625	0.414625	0.26675	266.75					38.9896	7918.48			155.75	3747.89			0.1089	119.028			45.923	288.207
2019-12-02_01:00:00	2019-12-02 11:00:00	14.44	99.05	20.48	0	0	0	288.95	14.25	-3.34	15.8	14.6362	283.191	25.4	15.6	7.1	284.2	172.9	233	2019-12-26	4.7975	11.0083	0.07	317.667	0.317667	0.4255	425.5					38.5745	7395			24.2064	3578.43			0.04	111.936			56.7942	286.835
2019-12-02_02:00:00	2019-12-02 12:00:00	9.43	64.89	13.49	0	0	0	289.4	14.77	-3.34	16.25	15.1429	282.742	24.2	15.9	7	283	156.7	216	2019-12-27	2.88417	6.94583	0	269.958	0.269958	0.135708	135.708					16.4971	8458.48			114.704	4625.36			0.1225	96.6289			66.3074	300.777
2019-12-02_03:00:00	2019-12-02 13:00:00	5.09	34.15	7.46	0	0	0	290.05	14.83	-2.72	16.9	15.0774	280.393	19	16.9	7.3	270	114.8	227	2019-12-28	2.66458	5.11667	0.0420833	114.75	0.11475	0.123833	123.833					6.01271	8839.53			133.172	6278.98			1.26218e-27	66.9124			60.4876	308.964
2019-12-02_04:00:00	2019-12-02 14:00:00	2.65	16.57	4.04	0	0	0	290.39	15.04	-1.8	17.24	15.1473	276.825	10.1	18.2	8	280.1	78	324	2019-12-29	5.46542	11.2958	0.217083	206.958	0.206958	0.288833	288.833					33.9938	7231.59			36.7236	8383.23			0.9216	42.7716			51.0843	336.625
2019-12-02_05:00:00	2019-12-02 15:00:00	1.54	10.27	2.62	0	0	0	290.02	15.33	-0.78	16.87	15.3498	272.913	9	18.5	7.5	272.5	79.6	349	2019-12-30	4.28167	5.96667	0.172917	270.5	0.2705	0.205652	205.652					2.83923	8381.71			40.7044	8851.05			2.6569	43.6921			61.6198	325.796
2019-12-02_06:00:00	2019-12-02 16:00:00	1.03	7.44	2.08	0	0	0	289.42	15.56	-0.67	16.27	15.5744	272.466	9.8	18.5	8.6	272.1	65.7	293	2019-12-31	7.6075	15.1167	0.372083	362.042	0.362042	0.593542	593.542					56.3876	6252.99			59.5984	8802.19			4.9729	51.9841			48.6425	375.368
2019-12-02_07:00:00	2019-12-02 17:00:00	1.64	12.56	3.64	0	0	0	288.61	15.32	-0.27	15.46	15.3224	271.01	10.6	18	8.7	277.4	101.6	343	2020-01-01	6.37727	22.0455	0.148182	821.364	0.821364							245.492	5384.22			48.4416	8364.93			6.4516	72.5904			43.8559	369.5
2019-12-02_08:00:00	2019-12-02 18:00:00	1.72	16.06	4.93	0	0	0	287.46	14.32	0.17	14.31	14.321	269.32	8.9	17.1	7.4	272	120.4	244													152618	282462			15.7609	8440.1			7.7841	111.725			47.9004	286.321
2019-12-02_09:00:00	2019-12-02 19:00:00	1.02	15.54	5.08	0	0	0	285.99	11.9	0.44	12.84	11.9081	267.882	9.8	15.7	6.2	272.3	125.3	288																	22.2784	8248.27			8.1796	180.634			32.5828	177.106
2019-12-02_10:00:00	2019-12-02 20:00:00	0.14	14.08	4.97	0	0	0	285.09	11.29	1.19	11.94	11.3525	263.983	13.7	14.7	5.7	277.2	170.3	315																	76.2129	7574.22			7.6176	235.316			31.9512	150.125
2019-12-02_11:00:00	2019-12-02 21:00:00	0.07	16.93	5.88	0	0	0	284.14	9.81	1.83	10.99	9.97923	259.433	29.8	14.1	5.3	274.9	238.1	268																	572.166	4902.8			9.6721	285.272			21.8952	109.814
2019-12-02_12:00:00	2019-12-02 22:00:00	0.03	22.07	7.58	0	0	0	283.33	8.44	1.59	10.18	8.58846	259.331	30.2	13	4.5	268.2	252.2																		511.664	4613.13			7.9524	353.44			16.7155	68.6986
2019-12-02_13:00:00	2019-12-02 23:00:00	0.01	22.53	7.82	0	0	0	282.32	6.95	1.09	9.17	7.03496	261.087	23.7	12	4.4	277.8	205.2	165																	252.174	5502.67			8.0089	433.056			6.94299	44.0226
2019-12-02_14:00:00	2019-12-03 00:00:00	0	23.19	8.04	0	0	0	281.37	5.86	0.96	8.22	5.93811	260.696	32.3	10.8	2.9	279	281.1	184																	588.548	4271.93			6.6564	527.162			9.23014	16.3064
2019-12-02_15:00:00	2019-12-03 01:00:00	0	23.02	7.97	0	0	0	280.6	5.65	0.8	7.45	5.70636	261.941	35.7	9.9	2.9	294.9	313.5	293																	768.953	3847.72			6.0025	606.637			7.87563	14.4883
2019-12-02_16:00:00	2019-12-03 02:00:00	0	22.36	7.86	0	0	0	280.03	5.55	0.33	6.88	5.5598	266.597	33.1	9.2	3.4	295.6	252.8	263																	637.058	4191.27			5.3824	670.81			4.66475	17.304
2019-12-02_17:00:00	2019-12-03 03:00:00	0	26.91	9.32	0	0	0	279.88	5.69	-0.09	6.73	5.69071	270.906	32.4	8.5	3.2	299.1	239.1	224																	532.686	4093.44			3.1329	715.562			6.20364	16.7339
2019-12-02_18:00:00	2019-12-03 04:00:00	0	31.4	10.6	0	0	0	279.72	5.66	-0.19	6.57	5.66319	271.923	28.9	7.9	2.4	305.1	219.5	308																	334.89	4382.44			1.7689	756.8			10.6484	10.6484
2019-12-02_19:00:00	2019-12-03 05:00:00	0	31.98	10.88	0	0	0	279.38	5.58	-0.54	6.23	5.60607	275.528	23.4	6.9	1	309.1	161.6	354																	156.75	5100.82			0.4489	832.322			21.2159	21.2159
2019-12-02_20:00:00	2019-12-03 06:00:00	0	27.89	9.85	0	0	0	282.15	6.18	0.3	9	6.18728	267.221	16.8	7.4	1.3	300.2	111.7	479																	48.3025	6248.9			2.56	654.336			23.8855	23.8855
2019-12-02_21:00:00	2019-12-03 07:00:00	0	22.84	8.3	0	0	0	284.3	6.92	0.9	11.15	6.97828	262.59	12.4	10.5	2.9	293.3	75.8	384																	16.81	7225			0.4225	413.309			16.6324	25.7889
2019-12-02_22:00:00	2019-12-03 08:00:00	0	21.1	7.75	0	0	0	286.18	7.02	0.84	13.03	7.07008	263.177	10.6	12.5	3.9	262.2	56.2	424																	8.1225	7630.02			0.2809	270.602			10.0494	38.0699
2019-12-02_23:00:00	2019-12-03 09:00:00	0	20.81	7.65	0	0	0	287.89	7.39	0.66	14.74	7.41941	264.896	7.3	14.4	4.6	269.6	52.8	634																	0.1225	8235.56			0.1156	164.866			7.94909	52.1199
2019-12-03_00:00:00	2019-12-03 10:00:00	0	16.97	6.34	0	0	0	289.5	7.74	0.39	16.35	7.74982	267.115	6.6	16.6	4.3	272.8	45.8	534																	0.0676	8604.42			0.0625	81.5409			11.9013	52.5599
2019-12-03_01:00:00	2019-12-03 11:00:00	0	14.11	5.29	0	0	0	290.81	7.96	0.32	17.66	7.96643	267.698	5.5	18.6	3.7	279.2	39.2	511																	0.0441	9007.91			0.8836	32.7184			18.2024	47.1479
2019-12-03_02:00:00	2019-12-03 12:00:00	0	14.37	5.45	0	0	0	291.9	8	0.18	18.75	8.00202	268.711	7.5	20.1	4.2	283.8	38	518																	4.2025	8602.56			1.8225	9.7969			14.4554	54.79
2019-12-03_03:00:00	2019-12-03 13:00:00	0	14.33	5.67	0.02	0	0	292.75	8.26	0.21	19.6	8.26267	268.544	3	21.1	4.9	290.5	32.7	472																	7.1289	9414.82			2.25	2.25			11.3075	69.9342
2019-12-03_04:00:00	2019-12-03 14:00:00	0	13.16	5.49	0.05	0	0	293.32	8.39	0.35	20.17	8.3973	267.611	5.6	22	5.2	277.7	28.9	439																	0.0121	8951.05			3.3489	3.3489			10.2227	77.3924
2019-12-03_05:00:00	2019-12-03 15:00:00	0.01	12.73	5.41	0.06	0	0	293.62	8.3	0.56	20.47	8.31887	266.14	5	22.5	5	270.6	29.1	501																	0.1681	9080.18			4.1209	4.1209			11.0149	72.5711
2019-12-03_06:00:00	2019-12-03 16:00:00	0.04	13.66	5.82	0.08	0	0	293.49	8.47	0.72	20.34	8.50055	265.141	3.8	22.5	4.9	264.4	28.4	323																	4.0804	9231.37			4.6656	4.6656			12.9639	73.9694
2019-12-03_07:00:00	2019-12-03 17:00:00	0.07	14.39	5.88	0.06	0	0	292.8	8.78	0.86	19.65	8.82202	264.406	2.4	22.2	5	258	25.6	310																	12.1104	9490.66			6.5025	6.5025			14.6078	81.3968
2019-12-03_08:00:00	2019-12-03 18:00:00	0.05	15.07	5.97	0.05	0	0	291.5	8.49	0.69	18.35	8.51799	265.354	7.5	21.6	4.3	262.1	32.2	245																	2.3409	8506.37			10.5625	10.5625			17.7915	64.2882
2019-12-03_09:00:00	2019-12-03 19:00:00	0.05	16.76	6.53	0.05	0	0	289.15	7.36	0.01	16	7.36001	269.922	6.5	20.2	3.5	269.5	36.7	164																	0.0009	8587.73			17.64	33.4084			14.8997	36.7237
2019-12-03_10:00:00	2019-12-03 20:00:00	0.06	17.17	6.68	0.05	0	0	288.53	8.12	-0.46	15.38	8.13302	273.242	6.2	18.5	3.2	292.2	32.6	172																	0.2304	8615.55			9.7344	65.61			24.3347	42.6803
2019-12-03_11:00:00	2019-12-03 21:00:00	0.05	16.52	6.43	0.04	0	0	287.96	8.01	-0.72	14.81	8.04229	275.136	4.4	17.7	3.6	296.9	23.3	132																	4.1209	9000.32			8.3521	89.6809			19.734	46.817
2019-12-03_12:00:00	2019-12-03 22:00:00	0.03	14.11	5.42	0.02	0	0	287.32	7.85	-0.05	14.17	7.85016	270.365	2	17	3.6	299.3	17.5	106																	11.6964	9658.96			8.0089	116.856			18.0639	44.2246
2019-12-03_13:00:00	2019-12-03 23:00:00	0.01	12.08	4.67	0.01	0	0	286.5	7.24	0.26	13.35	7.24467	267.943	1.4	16	3.1	301.4	14.7	137																	10.6929	9926.14			7.0225	159.517			17.1783	30.7433
2019-12-03_14:00:00	2019-12-04 00:00:00	0	10.94	4.32	0.01	0	0	285.68	6.41	0.07	12.53	6.41038	269.374	4.1	15	2.6	304.8	15.4	171																	0.0484	9463.4			6.1009	208.802			14.519	17.7273
2019-12-03_15:00:00	2019-12-04 01:00:00	0	9.65	4.07	0.01	0	0	284.74	5.68	-0.01	11.59	5.68001	270.101	5.6	14.9	3	294.3	15.5	203																	2.3409	9221.76			10.9561	239.94			7.18245	15.0545
2019-12-03_16:00:00	2019-12-04 02:00:00	0	11.15	4.81	0.01	0	0	283.88	5.26	-0.11	10.73	5.26115	271.198	0.4	13.9	2	306.3	10.3	222																	19.4481	10098.2			10.0489	301.022			10.6351	10.6351
2019-12-03_17:00:00	2019-12-04 03:00:00	0	12.32	5.53	0.01	0	0	283.2	4.89	-0.33	10.05	4.90112	273.861	1.7	11.9	0.8	316.8	10.5	227																	14.6689	9696.34			3.4225	401.201			16.8192	16.8192
2019-12-03_18:00:00	2019-12-04 04:00:00	0	13.33	5.92	0	0	0	282.52	4.52	-0.48	9.37	4.54542	276.062	1.8	9.5	0.6	313.8	9.1	203																	16.9744	9600.08			0.0169	534.072			15.5663	15.5663
2019-12-03_19:00:00	2019-12-04 05:00:00	0	14.66	6.59	0	0	0	281.77	4.15	-0.92	8.62	4.25075	282.5	4.2	7.4	0.9	301.4	11.5	179																	5.7121	9007.91			1.4884	673.922			11.2275	11.2275
2019-12-03_20:00:00	2019-12-04 06:00:00	0	15.92	7.08	0	0	0	286.05	4.47	-0.51	12.9	4.499	276.509	2.3	8.7	1	312.8	11.7	143																	22.8484	9277.54			17.64	415.344			12.243	12.243
2019-12-03_21:00:00	2019-12-04 07:00:00	0.01	17.25	7.7	0	0	0	288.43	6.59	0.63	15.28	6.62005	264.539	1.6	15.4	2.1	281.7	15.4	230																	37.21	9292.96			0.0144	127.69			20.4308	20.4308
2019-12-03_22:00:00	2019-12-04 08:00:00	0.01	16.58	7.53	0	0	0	289.55	7.13	1.18	16.4	7.22698	260.603	1.1	17.6	3.4	266.6	10.8	79																	41.3449	9422.58			1.44	63.6804			14.6458	33.9537
2019-12-03_23:00:00	2019-12-04 09:00:00	0.01	15.18	6.96	0	0	0	290.69	7.27	1.19	17.54	7.36675	260.704	3.9	18.6	4.2	267.9	12.9	55																	9.3636	8994.63			1.1236	34.1056			10.0283	45.7889
2019-12-04_00:00:00	2019-12-04 10:00:00	0.01	12.41	5.8	0	0	0	291.83	7.75	1.18	18.68	7.83932	261.343	4.2	19.9	4.1	260.4	11.8	69																	2.56	9158.49			1.4884	11.56			13.9825	50.9699
2019-12-04_01:00:00	2019-12-04 11:00:00	0.02	9.47	4.43	0	0	0	292.84	8.09	1.19	19.69	8.17705	261.632	-0.2	21.5	3.9	273.4	7.5	62																	21.4369	10296.2			3.2761	3.2761			18.2932	52.9555
2019-12-04_02:00:00	2019-12-04 12:00:00	0.02	8.07	3.76	0	0	0	293.79	8.32	1.29	20.64	8.41941	261.187	2.4	22.7	3.9	275.9	8.9	66																	1.8496	9908.21			4.2436	4.2436			20.4251	56.5416
2019-12-04_03:00:00	2019-12-04 13:00:00	0.02	7.43	3.43	0	0	0	294.4	8.14	1.56	21.25	8.28814	259.151	2	23.8	4.1	276.9	9.4	88																	2.0449	10054.1			6.5025	9.4249			17.5405	57.5798
2019-12-04_04:00:00	2019-12-04 14:00:00	0.01	5.48	2.57	0.01	0	0	295.02	7.98	1.81	21.87	8.1827	257.221	5.3	24.6	5.1	257.9	13.7	281																	7.4529	9570.71			7.4529	20.1601			9.50301	71.9561
2019-12-04_05:00:00	2019-12-04 15:00:00	0	5.15	2.39	0	0	0	295.2	7.76	2	22.05	8.01359	255.548	5.8	24.8	4.9	259.5	15.6	1015																	11.6281	9508.2			7.5625	23.7169			9.69443	65.8303
2019-12-04_06:00:00	2019-12-04 16:00:00	0	4.94	2.28	0	0	0	295.08	7.54	1.99	21.93	7.79819	255.215	0.8	24.7	4.7	259.2	12.1	365																	2.1904	10530.9			7.6729	21.6225			9.59875	59.2621
2019-12-04_07:00:00	2019-12-04 17:00:00	0	4.14	1.88	0	0	0	294.6	7.22	1.92	21.45	7.47093	255.108	3.3	24.5	4.4	257.5	14.6	221																	2.0164	10104.3			9.3025	15.7609			9.43061	49.9981
2019-12-04_08:00:00	2019-12-04 18:00:00	0	4.79	2.12	0	0	0	293.42	6.49	1.62	20.27	6.68913	255.985	4.6	24.1	3.4	257.9	14.7	176																	6.1504	9797.04			14.6689	14.6689			10.8184	27.9749
2019-12-04_09:00:00	2019-12-04 19:00:00	0	5.61	2.51	0.01	0	0	289.21	3.94	0.12	16.06	3.94183	268.255	2.7	22.7	2.7	273.3	12	164																	0.0361	10098.2			44.0896	44.0896			1.54213	3.39233
2019-12-04_10:00:00	2019-12-04 20:00:00	0	5.96	2.83	0.03	0	0	288.26	4.42	-0.63	15.11	4.46467	278.112	4.7	20.4	1.6	285.9	13.5	128																	3.4969	9637.35			27.9841	41.8609			8.20635	8.20635
2019-12-04_11:00:00	2019-12-04 21:00:00	0	6.18	2.96	0.03	0	0	287.62	4.92	-0.67	14.47	4.96541	277.755	5.1	17.3	1.1	310.9	16.4	193																	4.5796	9533.57			8.0089	104.244			14.9414	14.9414
2019-12-04_12:00:00	2019-12-04 22:00:00	0	6.59	2.97	0.01	0	0	286.75	4.88	-0.45	13.6	4.9007	275.269	6.5	14.8	1.3	302.9	19.6	104																	12.4609	9260.21			1.44	184.416			12.9651	12.9651
2019-12-04_13:00:00	2019-12-04 23:00:00	0	7.08	3.14	0	0	0	285.89	4.74	-0.45	12.74	4.76131	275.423	3.9	13.3	0.6	280.6	18.1	172																	0.5776	9733.8			0.3136	254.084			17.3165	17.3165
2019-12-04_14:00:00	2019-12-05 00:00:00	0	6.99	3.1	0	0	0	284.69	4.19	-0.57	11.54	4.22859	277.747	3	12.2	1	284.5	17.9	203																	0.01	9920.16			0.4356	332.698			10.4238	10.4238
2019-12-04_15:00:00	2019-12-05 01:00:00	0	6.88	3.05	0	0	0	283.42	3.8	-0.81	10.27	3.88537	282.033	3.7	11.5	1	285.7	22.1	248																	0.4225	9791.1			1.5129	408.444			8.32536	8.32536
2019-12-04_16:00:00	2019-12-05 02:00:00	0	7.21	3.16	0	0	0	282.29	3.61	-0.91	9.14	3.72293	284.148	5.3	11.2	0.9	304.6	26.2	174																	4.5796	9455.62			4.2436	468.29			7.96893	7.96893
2019-12-04_17:00:00	2019-12-05 03:00:00	0	7.82	3.41	0	0	0	281.32	3.34	-1.15	8.17	3.53244	288.999	7.2	9.8	1.9	301.6	30.1	175																	14.3641	9042.11			2.6569	576.48			2.66485	2.66485
2019-12-04_18:00:00	2019-12-05 04:00:00	0	9.03	3.96	0	0	0	280.64	2.99	-1.15	7.49	3.20353	291.038	5	8.3	1.7	306.6	28.8	191																	1.0816	9358.63			0.6561	685.916			2.2606	2.2606
2019-12-04_19:00:00	2019-12-05 05:00:00	0	10.3	4.56	0	0	0	280.13	2.75	-1.01	6.98	2.92961	290.167	5.2	8.4	0.2	350.8	28.2	324																	0.4096	9204.48			2.0164	707.56			7.45076	7.45076
2019-12-04_20:00:00	2019-12-05 06:00:00	0	10.64	4.77	0	0	0	285.76	2.01	0.76	12.61	2.14888	249.288	6.3	10.1	0.1	305.8	30.3	444																	2.3409	8954.84			6.3001	371.333			4.19792	6.5082
2019-12-04_21:00:00	2019-12-05 07:00:00	0	9.72	4.6	0	0	0	288.01	2.36	1.87	14.86	3.01106	231.608	7.2	15.9	1.4	274.3	35.9	538																	6.76	8817.21			1.0816	125.888			2.59552	2.59552
2019-12-04_22:00:00	2019-12-05 08:00:00	0	6.46	3.21	0	0	0	289.95	2.76	2.49	16.8	3.71722	227.944	2.4	18.9	2.9	260.9	26.7	482																	0.6561	10018			4.41	39.4384			0.667843	3.30228
2019-12-04_23:00:00	2019-12-05 09:00:00	0	4.65	2.33	0	0	0	291.71	3.23	2.7	18.56	4.20986	230.107	2.1	21.1	3	265.4	19.5	814																	0.0529	10255.6			6.4516	6.4516			1.46376	5.80741
2019-12-05_00:00:00	2019-12-05 10:00:00	0	4.33	2.15	0	0	0	293.14	3.71	2.61	19.99	4.5361	234.873	5.7	23.1	3.2	264.7	18.8	307																	12.6025	9574.62			9.6721	9.6721			1.78516	8.62068
2019-12-05_01:00:00	2019-12-05 11:00:00	0	4.22	2.1	0	0	0	294.36	4.1	2.56	21.21	4.83359	238.02	8.9	24.2	3.7	262.7	19.5	164																	46.24	8968.09			8.9401	11.7649			1.28503	13.9397
2019-12-05_02:00:00	2019-12-05 12:00:00	0	4.06	2.01	0	0	0	295.42	4.55	2.27	22.27	5.08482	243.485	4.9	25.3	3.6	263.2	17.2	110																	8.3521	9759.46			9.1809	31.2481			2.20469	15.0918
2019-12-05_03:00:00	2019-12-05 13:00:00	0	3.92	1.92	0	0	0	296.25	4.76	2.13	23.1	5.21483	245.892	3	26.5	3.7	266.4	12.7	114																	1.1664	10156.6			11.56	58.0644			2.29472	16.9319
2019-12-05_04:00:00	2019-12-05 14:00:00	0	3.71	1.81	0	0	0	296.79	4.87	2.15	23.64	5.32348	246.18	0.8	27.2	3.9	268	7.7	330																	1.0201	10627.5			12.6736	78.4996			2.02628	19.5671
2019-12-05_05:00:00	2019-12-05 15:00:00	0	3.45	1.68	0	0	0	297.01	4.88	2.02	23.86	5.28155	247.514	2.2	27.6	3.9	270.4	9.6	1275																	0.2704	10367.3			13.9876	89.8704			1.90869	19.198
2019-12-05_06:00:00	2019-12-05 16:00:00	0	3.35	1.62	0	0	0	296.95	4.83	1.66	23.8	5.1073	251.033	-0.9	27.3	4.2	266.9	6.2	683																	6.3504	11020.8			12.25	83.1744			0.823191	20.3157
2019-12-05_07:00:00	2019-12-05 17:00:00	0	3.39	1.63	0	0	0	296.59	4.85	1.13	23.44	4.9799	256.885	1	26.9	3.9	267.9	8.4	199																	0.3969	10623.4			11.9716	69.8896			1.16618	16.6456
2019-12-05_08:00:00	2019-12-05 18:00:00	0	3.98	1.9	0	0	0	295.68	4.46	0.67	22.53	4.51004	261.457	0.7	26	4	266.9	8.7	143																	1.44	10629.6			12.0409	42.9025			0.260145	13.7644
2019-12-05_09:00:00	2019-12-05 19:00:00	0	5.2	2.6	0.02	0	0	290.71	3.27	-0.29	17.56	3.28283	275.068	0.4	24.3	2.7	283.9	8	106																	4.84	10547.3			45.4276	45.4276			0.339696	1.3991
2019-12-05_10:00:00	2019-12-05 20:00:00	0	6.97	4.03	0.1	0	0	290.21	3.15	-1.77	17.06	3.61323	299.332	2.9	21.8	1.6	309.1	11.3	146																	1.2769	9755.51			22.4676	22.4676			4.05308	4.05308
2019-12-05_11:00:00	2019-12-05 21:00:00	0	5.44	3.06	0.07	0	0	290.53	3.84	-2.17	17.38	4.41073	299.471	3.1	18.9	0.7	310	15.3	112																	0.0016	9908.21			2.3104	32.49			13.7695	13.7695
2019-12-05_12:00:00	2019-12-05 22:00:00	0.01	4.32	2.38	0.05	0	0	289.82	3.95	-1.92	16.67	4.39191	295.923	6.3	16.9	0.4	314.5	18.4	150																	15.3664	9412.88			0.0529	70.7281			15.9354	15.9354
2019-12-05_13:00:00	2019-12-05 23:00:00	0.04	3.9	1.85	0.01	0	0	288.99	3.86	-1.86	15.84	4.28476	295.728	7.4	15	0.7	331.6	19.1	120																	30.8025	9302.6			0.7056	124.1			12.8505	12.8505
2019-12-05_14:00:00	2019-12-06 00:00:00	0.05	4	1.9	0.01	0	0	288.4	3.71	-2.15	15.25	4.28796	300.093	6.6	13.5	0.9	326.5	17.3	203																	22.09	9447.84			3.0625	175.033			11.4783	11.4783
2019-12-05_15:00:00	2019-12-06 01:00:00	0.06	4	1.89	0.01	0	0	288.24	3.63	-2.6	15.09	4.46508	305.612	7.4	12.3	0.9	328.8	15.9	156																	30.3601	9294.89			7.7841	212.868			12.7098	12.7098
2019-12-05_16:00:00	2019-12-06 02:00:00	0.09	4.41	2	0	0	0	288.25	3.4	-3.1	15.1	4.60109	312.357	8.3	11.4	1	321	16.1	129																	39.69	9101.16			13.69	239.63			12.9678	12.9678
2019-12-05_17:00:00	2019-12-06 03:00:00	0.1	4.66	2.11	0	0	0	288.23	3.34	-3.4	15.08	4.76609	315.51	8.4	10.7	0.9	307.6	15.7	109																	39.5641	9061.14			19.1844	262.44			14.9466	14.9466
2019-12-05_18:00:00	2019-12-06 04:00:00	0.06	4.45	2.09	0.01	0	0	288.36	3.66	-3.52	15.21	5.07799	313.883	8.3	10.2	0.7	310.3	15.5	120																	38.5641	9084			25.1001	274.565			19.1668	19.1668
2019-12-05_19:00:00	2019-12-06 05:00:00	0.03	4.24	2.07	0.01	0	0	288.51	4.04	-3.51	15.36	5.35179	310.985	9.6	10.1	0.3	318	16.3	379																	56.7009	8841.64			27.6676	272.91			25.5206	25.5206
2019-12-05_20:00:00	2019-12-06 06:00:00	0.01	3.95	1.94	0.01	0	0	292.88	5.34	-2.78	19.73	6.0203	297.501	15.3	11.5	0.1	312.7	22.6	343																	178.49	7825.17			67.7329	115.562			35.0499	35.0499
2019-12-05_21:00:00	2019-12-06 07:00:00	0.05	4.03	1.87	0	0	0	295.3	6.98	-1.94	22.15	7.24458	285.533	18.7	19	1.3	277.6	27.5	503																	283.249	7247.12			9.9225	9.9225			35.3381	35.3381
2019-12-05_22:00:00	2019-12-06 08:00:00	0.26	5.13	2.06	0	0	0	296.42	7.88	-0.35	23.27	7.88777	272.543	9.2	23.8	4.8	286.6	19.8	766																	50.9796	8918.91			0.2809	25.9081			9.53432	62.2169
2019-12-05_23:00:00	2019-12-06 09:00:00	0.4	5.58	2.14	0	0	0	297.27	7.61	-0.13	24.12	7.61111	270.979	16	25.6	5.2	282.3	26.3	546																	192.1	7666.75			2.1904	59.9076			5.81345	64.1779
2019-12-06_00:00:00	2019-12-06 10:00:00	0.47	5.74	2.13	0	0	0	298.17	7.52	0.3	25.02	7.52598	267.715	8.6	27	5.4	277.7	21.4	505																	41.8609	9019.3			3.9204	100.802			4.5198	66.0316
2019-12-06_01:00:00	2019-12-06 11:00:00	0	0	0	0	0	0	299.02	4.7	0.51	25.87	4.72759	263.807	1.7	28.1	5.2	273.7	25.7	491																	2.89	10816			4.9729	143.76			0.223172	26.2922
2019-12-06_02:00:00	2019-12-06 12:00:00	0	0	0	0	0	0	299.63	5.84	0.97	26.48	5.92001	260.569	5	28.6	4.7	271.4	28.1	517																	25	10140.5			4.4944	171.61			1.48842	33.8725
2019-12-06_03:00:00	2019-12-06 13:00:00	0	0.06	0.05	0	0	0	300.1	5.6	1.21	26.95	5.72923	257.807	8.5	29.2	5	274.2	30.4	573																	71.4025	9438.12			5.0625	200.789			0.531779	35.1558
2019-12-06_04:00:00	2019-12-06 14:00:00	0	0.16	0.14	0.01	0	0	300.39	5.32	1.71	27.24	5.58807	252.181	10.7	29.9	5.2	280.1	35	892																	111.514	8998.42			7.0756	229.826			0.150596	35.857
2019-12-06_05:00:00	2019-12-06 15:00:00	0	0.09	0.08	0	0	0	300.47	5.16	1.82	27.32	5.47156	250.572	13	29.9	5.8	276.7	45.6	1678																	166.926	8578.46			6.6564	232.258			0.107871	41.8811
2019-12-06_06:00:00	2019-12-06 16:00:00	0	0.19	0.17	0.01	0	0	300.28	4.91	2.08	27.13	5.3324	247.041	11.5	29.6	4.9	279.2	41.8	914																	128.369	8841.64			6.1009	217.562			0.186971	29.511
2019-12-06_07:00:00	2019-12-06 17:00:00	0	0.34	0.3	0.02	0	0	299.74	4.68	1.84	26.59	5.02872	248.537	5.4	28.9	4.5	270.9	31	654																	26.01	10000			5.3361	182.52			0.279542	22.3608
2019-12-06_08:00:00	2019-12-06 18:00:00	0	132.61	120.67	7.88	0.02	0.01	296.93	-0.25	3.81	23.78	3.81819	176.246	6.1	28.3	4.1	269.6	33.6	657																	13126.3	13126.3			20.4304	102.01			0.079415	9.72313
2019-12-06_09:00:00	2019-12-06 19:00:00	0	308.87	281.23	18.05	0.04	0.02	289.78	-2.4	1.78	16.63	2.98804	126.563	2.7	26.6	2.8	259.7	22.9	221																	77579	77579			99.4009	99.4009			0.0353601	0.976229
2019-12-06_10:00:00	2019-12-06 20:00:00	0	171.77	156.31	9.89	0.02	0.01	287.94	-1.59	-2.09	14.79	2.62606	37.2627	3.1	24.6	2	283.9	27.1	166																	23473.3	23473.3			96.2361	96.2361			0.391953	0.391953
2019-12-06_11:00:00	2019-12-06 21:00:00	0	106.79	97	6.05	0.01	0.01	287.2	-1.17	-3.36	14.05	3.55788	19.1989	3.9	22.8	1.5	301.6	25.5	178																	8667.61	8667.61			76.5625	76.5625			4.23486	4.23486
2019-12-06_12:00:00	2019-12-06 22:00:00	0	63.6	57.7	3.54	0.01	0	286.72	-0.93	-3.89	13.57	3.99962	13.4457	3.9	22	1.5	303.5	24	271																	2894.44	2894.44			71.0649	71.0649			6.24813	6.24813
2019-12-06_13:00:00	2019-12-06 23:00:00	0	47.89	43.53	2.63	0.01	0	286.55	-0.58	-4.3	13.4	4.33894	7.68199	6	18.8	1	323.3	32.7	275																	1408.5	3155.07			29.16	95.6484			11.1485	11.1485
2019-12-06_14:00:00	2019-12-07 00:00:00	0	39.5	35.97	2.15	0	0	286.66	-0.09	-4.71	13.51	4.71086	1.09477	5	16.3	1.3	312.3	33.3	327																	959.141	4189.97			7.7841	148.109			11.634	11.634
2019-12-06_15:00:00	2019-12-07 01:00:00	0	34.89	31.78	1.87	0	0	285.85	-0.02	-4.81	12.7	4.81004	0.238311	6.3	14.1	1	314.6	34	184																	649.23	4572.46			1.96	230.432			14.5164	14.5164
2019-12-06_16:00:00	2019-12-07 02:00:00	0	30.07	27.38	1.59	0	0	285.59	-0.12	-4.93	12.44	4.93146	1.39443	6	13.1	0.7	322.4	31.9	190																	457.104	5230.18			0.4356	270.274			17.9053	17.9053
2019-12-06_17:00:00	2019-12-07 03:00:00	0	25.06	22.82	1.31	0	0	285.27	0.14	-4.99	12.12	4.99196	358.393	6	12	0.9	322.3	31.6	172																	282.912	5910.53			0.0144	318.98			16.7442	16.7442
2019-12-06_18:00:00	2019-12-07 04:00:00	0	20.08	18.3	1.04	0	0	285.35	0.46	-4.93	12.2	4.95141	354.669	5.9	11.1	0.8	334.8	29.9	174																	153.76	6642.25			1.21	348.942			17.2342	17.2342
2019-12-06_19:00:00	2019-12-07 05:00:00	0	15.32	13.96	0.78	0	0	285.57	0.92	-4.92	12.42	5.00528	349.409	6	9.7	0.8	326.2	28.6	509																	63.3616	7351.35			7.3984	394.42			17.6844	17.6844
2019-12-06_20:00:00	2019-12-07 06:00:00	0	11.54	10.46	0.58	0	0	291.92	1.7	-3.82	18.77	4.1812	336.01	6.2	10.8	0.6	325	27.3	207																	18.1476	7928.12			63.5209	154.008			12.825	12.825
2019-12-06_21:00:00	2019-12-07 07:00:00	0	7.56	6.85	0.38	0	0	295.97	2.38	-3.73	22.82	4.42462	327.459	3.2	15.6	0.6	314	25.9	319																	13.3225	9148.92			52.1284	52.1284			14.6278	14.6278
2019-12-06_22:00:00	2019-12-07 08:00:00	0	3.12	2.82	0.15	0	0	297.75	2.76	-2.57	24.6	3.77127	312.958	4.1	21.9	0.4	288.1	26.8	402																	1.6384	9757.49			7.29	20.4304			11.3655	11.3655
2019-12-06_23:00:00	2019-12-07 09:00:00	0	1.89	1.68	0.09	0	0	298.76	3.76	-2.02	25.61	4.26825	298.246	5.4	24.6	1.2	241.8	22.8	330																	13.8384	9725.9			1.0201	67.7329			9.41419	9.41419
2019-12-07_00:00:00	2019-12-07 10:00:00	0	1.47	1.3	0.07	0	0	299.68	4.54	-1.6	26.53	4.81369	289.414	5.3	26	2.3	253	19	279																	16	9820.81			0.2809	111.303			6.31863	6.31863
2019-12-07_01:00:00	2019-12-07 11:00:00	0	1.4	1.23	0.06	0	0	300.45	4.84	-1.38	27.3	5.03289	285.914	2.1	27.2	2.6	257.2	14.8	335																	0.7569	10479.6			0.01	156.75			5.91896	8.02528
2019-12-07_02:00:00	2019-12-07 12:00:00	0	1.37	1.19	0.06	0	0	301.16	4.96	-0.92	28.01	5.0446	280.508	2	28.1	3.2	271.6	15.2	305																	0.6561	10508.3			0.0081	199.657			3.40255	11.8653
2019-12-07_03:00:00	2019-12-07 13:00:00	0	1.25	1.07	0.05	0	0	301.75	4.82	-0.51	28.6	4.84691	276.04	4.8	28.9	3.5	250.2	13	241																	13.9129	9966.03			0.09	240.87			1.81416	12.5805
2019-12-07_04:00:00	2019-12-07 14:00:00	0	1.26	1.09	0.06	0	0	302.22	4.68	-0.25	29.07	4.68667	273.058	6.9	29.9	4.2	227.7	15	342																	33.7561	9547.24			0.6889	288.66			0.23685	16.7009
2019-12-07_05:00:00	2019-12-07 15:00:00	0	1.4	1.21	0.06	0	0	302.48	4.7	0.01	29.33	4.70001	269.878	6.8	29.9	4.5	224.7	14.9	550																	31.2481	9543.34			0.3249	297.563			0.0400043	19.3601
2019-12-07_06:00:00	2019-12-07 16:00:00	0	1.57	1.37	0.07	0	0	302.5	4.47	0.25	29.35	4.47699	266.799	5.8	29.7	4.2	240.6	12.3	405																	19.6249	9708.16			0.1225	291.385			0.076721	15.031
2019-12-07_07:00:00	2019-12-07 17:00:00	0	2.46	2.19	0.13	0	0	302.13	4.25	0.21	28.98	4.25519	267.171	7	29.6	3.8	241	13.1	260																	23.1361	9314.18			0.3844	275.56			0.207193	10.5962
2019-12-07_08:00:00	2019-12-07 18:00:00	0	19.93	17.96	1.15	0	0	300.61	0.67	1.12	27.46	1.30511	210.888	9.3	28.6	3.8	226.2	15.6	204																	74.9956	6152.83			1.2996	198.246			6.2245	6.2245
2019-12-07_09:00:00	2019-12-07 19:00:00	0	68.62	61.19	3.86	0.01	0	293.67	-3.06	-6.23	20.52	6.94093	26.1591	8.9	26.6	2.2	223.7	15	150																	2734.24	2734.24			36.9664	36.9664			22.4764	22.4764
2019-12-07_10:00:00	2019-12-07 20:00:00	0	77.51	69.11	4.32	0.01	0	292.42	-2.12	-6.28	19.27	6.62818	18.6537	10.9	22.8	0.7	285.4	19.2	146																	3388.4	3388.4			12.4609	12.4609			35.1433	35.1433
2019-12-07_11:00:00	2019-12-07 21:00:00	0	71.24	63.21	3.91	0.01	0	291.66	-1.81	-6.18	18.51	6.4396	16.3244	8.4	18.8	0.5	330	19.8	233																	3004.14	3004.14			0.0841	21.8089			35.2789	35.2789
2019-12-07_12:00:00	2019-12-07 22:00:00	0	50.31	44.08	2.68	0.01	0	291.43	-1.52	-5.92	18.28	6.11202	14.4001	25.4	17.1	0.9	117.9	37.3	125																	348.942	1311.89			1.3924	43.56			27.1652	27.1652
2019-12-07_13:00:00	2019-12-07 23:00:00	0	38.82	33.86	2.02	0	0	290.97	-1.1	-5.82	17.82	5.92304	10.7029	332.9	16.1	0.4	99.8	353.7	127																	89424.9	89424.9			2.9584	64.9636			30.504	30.504
2019-12-07_14:00:00	2019-12-08 00:00:00	0	31.61	27.82	1.64	0	0	290.64	-0.27	-5.76	17.49	5.76632	2.68385	305.4	13.6	0.4	334.4	324.8	161																	77050.7	77050.7			15.1321	118.592			28.7974	28.7974
2019-12-07_15:00:00	2019-12-08 01:00:00	0	31.42	27.72	1.62	0	0	290.07	0.18	-6.06	16.92	6.06267	358.299	190.3	12.3	0.6	329.4	209.6	365																	26432.3	26432.3			21.3444	162.818			29.8408	29.8408
2019-12-07_16:00:00	2019-12-08 02:00:00	0	18.44	15.9	0.9	0	0	290.82	1.23	-6.47	17.67	6.58588	349.236	152.3	10.9	0.8	322.9	168.8	312																	18605	18605			45.8329	179.828			33.4764	33.4764
2019-12-07_17:00:00	2019-12-08 03:00:00	0	6.97	5.38	0.27	0	0	290.99	2.18	-6.61	17.84	6.96021	341.747	164.9	9.8	0.6	316.5	179.8	543																	25446.6	25446.6			64.6416	205.636			40.4523	40.4523
2019-12-07_18:00:00	2019-12-08 04:00:00	0	4.06	2.79	0.12	0	0	290.98	2.91	-6.31	17.83	6.94868	335.242	193.9	10.2	1	120.4	208.7	521																	36523	36523			58.2169	194.602			35.3868	35.3868
2019-12-07_19:00:00	2019-12-08 05:00:00	0	3.41	2.2	0.09	0	0	290.62	3.3	-5.98	17.47	6.83011	331.108	323.1	11.7	1.5	120.1	341.6	869																	102977	102977			33.2929	164.096			28.4101	28.4101
2019-12-07_20:00:00	2019-12-08 06:00:00	0	3.27	2.12	0.08	0	0	293.15	4.17	-6.04	20	7.33965	325.379	734.1	14.2	1.9	115.8	768.1	765																	535795	535795			33.64	60.5284			29.5898	29.5898
2019-12-07_21:00:00	2019-12-08 07:00:00	0	2.41	1.48	0.05	0	0	295.61	4.85	-5.77	22.46	7.5376	319.951	910.9	14.7	2.7	120.3	942.5	5786																	827045	827045			60.2176	60.2176			23.4024	29.5675
2019-12-07_22:00:00	2019-12-08 08:00:00	0	1.9	1.1	0.04	0	0	297.59	5.32	-4.79	24.44	7.15867	311.999		16.6	3.3	120.6		12438																	1.21	10941.2			61.4656	61.4656			14.8893	32.0205
2019-12-07_23:00:00	2019-12-08 09:00:00	0	1.52	0.87	0.03	0	0	299.2	5.14	-3.71	26.05	6.33906	305.821		18.8	3.9	125.6		6735																	0.7569	10989.3			52.5625	52.5625			5.94902	29.5834
2019-12-08_00:00:00	2019-12-08 10:00:00	0	1.08	0.67	0.02	0	0	300.63	4.99	-2.37	27.48	5.52422	295.405		21.6	4.5	137.5		4978																	0.4489	11031.3			34.5744	50.41			1.04903	27.2925
2019-12-08_01:00:00	2019-12-08 11:00:00	0	0.92	0.58	0.02	0	0	301.43	5.02	-1.24	28.28	5.17088	283.875		25.2	5.3	148.9		4823																	0.3364	11050.2			9.4864	132.25			0.016672	32.1589
2019-12-08_02:00:00	2019-12-08 12:00:00	0	0.89	0.56	0.02	0	0	302.05	5.06	-0.41	28.9	5.07658	274.632						5454																	0.3136	11054.4			835.21	835.21			25.7717	25.7717
2019-12-08_03:00:00	2019-12-08 13:00:00	0	0.9	0.56	0.02	0	0	302.5	4.98	0.13	29.35	4.9817	268.505						8068																	0.3136	11054.4			861.423	861.423			24.8173	24.8173
2019-12-08_04:00:00	2019-12-08 14:00:00	0	0.94	0.59	0.02	0	0	302.9	4.51	0.38	29.75	4.52598	265.184						16136																	0.3481	11048.1			885.062	885.062			20.4845	20.4845
2019-12-08_05:00:00	2019-12-08 15:00:00	0	1.05	0.7	0.03	0	0	303.19	4.12	0.67	30.04	4.17412	260.763		27.3	4.5	138		28118																	0.49	11025			7.5076	235.93			0.106196	15.0088
2019-12-08_06:00:00	2019-12-08 16:00:00	0	1.35	0.98	0.05	0	0	303.2	3.87	0.86	30.05	3.9644	257.471		26.2	4.9	139.3		24130																	0.9604	10966.3			14.8225	203.633			0.87534	16.5194
2019-12-08_07:00:00	2019-12-08 17:00:00	0	1.84	1.42	0.07	0	0	302.89	3.54	0.91	29.74	3.65509	255.584	604.9	25.2	3.8	128	634.9	22118																	364188	364188			20.6116	167.962			0.0209982	7.04952
2019-12-08_08:00:00	2019-12-08 18:00:00	0	16.97	15.17	0.97	0	0	301.22	-1.01	2.61	28.07	2.79861	158.845	642.8	23.1	4.5	123.5	673.1	23000																	393919	393919			24.7009	84.4561			2.89474	6.24304
2019-12-08_09:00:00	2019-12-08 19:00:00	0	17.74	15.91	1	0	0	295.66	-2.34	-2.36	22.51	3.32343	44.7563	642.6	20.4	3.1	116.7	672.3	24000																	392740	392740			4.4521	4.4521			0.0499218	2.63553
2019-12-08_10:00:00	2019-12-08 20:00:00	0	61.07	55.38	3.55	0.01	0	295.26	-1.12	-5.33	22.11	5.4464	11.8671	536.5	18.2	2.5	114.1	561.1	26000																	231476	236371			15.2881	15.2881			8.68129	9.89985
2019-12-08_11:00:00	2019-12-08 21:00:00	0	62.25	56.48	3.55	0.01	0	294.41	-0.63	-4.8	21.26	4.84117	7.47741	447.9		2.3	115.4	467.2	23000																	153210	158946			451.988	451.988			6.45753	6.45753
2019-12-08_12:00:00	2019-12-08 22:00:00	0	40.15	36.32	2.24	0	0	293.84	-0.58	-4.33	20.69	4.36867	7.62939	415		2	116.3	433.7	20000																	143399	143399			428.076	453.264			5.61061	5.61061
2019-12-08_13:00:00	2019-12-08 23:00:00	0	38.72	35.05	2.12	0	0	293.52	-0.41	-4.55	20.37	4.56844	5.14909	318.6		2	121.8	335.9	24000																	80400.6	80400.6			414.937	466.992			6.59686	6.59686
2019-12-08_14:00:00	2019-12-09 00:00:00	0	37.52	34.02	2.03	0	0	293.16	0.29	-4.35	20.01	4.35966	356.186	260		1.4	119.7	275	22000																	51067	51067			400.4	482.681			8.75956	8.75956
2019-12-08_15:00:00	2019-12-09 01:00:00	0	16.96	15.25	0.89	0	0	292.98	0.88	-4.25	19.83	4.34015	348.302	216.3		0.9	105.1	229.8	15264																	40421.1	40421.1			393.229	490.622			11.8346	11.8346
2019-12-08_16:00:00	2019-12-09 02:00:00	0	31.12	28.2	1.64	0	0	293.3	1.81	-4.61	20.15	4.9526	338.564	96.2		1.5	73.2	108.1	16509																	4624	4624			406.023	476.549			11.9204	11.9204
2019-12-08_17:00:00	2019-12-09 03:00:00	0	22.32	20.02	1.13	0	0	293.26	2.06	-4.98	20.11	5.38925	337.527	70.6		1.1	70.3	80.7	17998																	2558.34	2558.34			404.412	478.297			18.3977	18.3977
2019-12-08_18:00:00	2019-12-09 04:00:00	0	8.72	7.24	0.37	0	0	292.6	2.32	-5.32	19.45	5.80386	336.439	58		1.3	84.1	66.7	18165																	2576.58	2576.58			378.303	507.601			20.2848	20.2848
2019-12-08_19:00:00	2019-12-09 05:00:00	0	4.92	3.56	0.15	0	0	292.05	2.65	-5.26	18.9	5.88983	333.261	51.2		0.7	111.4	57.5	14859																	2269.57	2594.88			357.21	532.686			26.9343	26.9343
2019-12-08_20:00:00	2019-12-09 06:00:00	0	5	3.34	0.12	0	0	294.73	3.91	-4.81	21.58	6.19873	320.893	48.3		1.6	123.8	54.1	14985																	2021.4	2922.48			465.696	465.696			21.1483	21.1483
2019-12-08_21:00:00	2019-12-09 07:00:00	0	4.8	3.07	0.1	0	0	297.37	5.24	-4.71	24.22	7.04569	311.951	45.8		2.4	125.2	51.7	11380																	1825.85	3229.65			586.608	586.608			21.5824	21.5824
2019-12-08_22:00:00	2019-12-09 08:00:00	0	4.26	2.74	0.08	0	0	299.38	6.04	-3.75	26.23	7.10944	301.835	60.6		2.7	125.9	66.2	8203																	3347.78	3347.78			688.013	688.013			19.4431	25.0945
2019-12-08_23:00:00	2019-12-09 09:00:00	0	3.67	2.42	0.07	0	0	300.97	6.13	-2.43	27.82	6.59407	291.624	77.7		2.8	129.7	86.5	7583																	5667.08	5667.08			773.952	773.952			14.395	21.1055
2019-12-09_00:00:00	2019-12-09 10:00:00	0	3.18	2.14	0.07	0	0	302.08	6.05	-1.01	28.93	6.13373	279.478	96		2	139.4	108.4	4694																	8809.7	8809.7			836.945	836.945			17.0877	17.0877
2019-12-09_01:00:00	2019-12-09 11:00:00	0	2.96	2.05	0.07	0	0	302.9	5.62	0.33	29.75	5.62968	266.64	106.5		0.2	181.7	119.1	3239																	10909.8	10909.8			885.062	885.062			29.4814	29.4814
2019-12-09_02:00:00	2019-12-09 12:00:00	0.06	3.3	2.12	0.07	0	0	303.59	5.09	1.13	30.44	5.21392	257.483	89.3		2.5	291	101.9	2648																	7600.35	7600.35			926.594	926.594			7.36538	8.49095
2019-12-09_03:00:00	2019-12-09 13:00:00	0.3	4.78	2.18	0.06	0	0	304.21	4.84	1.52	31.06	5.07307	252.565	58.4		3.1	272	70.9	1880																	3160.69	3160.69			964.724	964.724			3.89299	11.3776
2019-12-09_04:00:00	2019-12-09 14:00:00	0.53	6.53	2.58	0.07	0	0	304.62	4.82	1.49	31.47	5.04505	252.822	54		3.3	282.5	66.1	1788																	2644.02	2644.02			990.361	990.361			3.04519	12.5674
2019-12-09_05:00:00	2019-12-09 15:00:00	0.79	8.42	3	0.07	0	0	304.86	4.68	1.28	31.71	4.85189	254.703	55.6		2.6	288.4	68.2	1750																	2766.76	2766.76			1005.52	1005.52			5.07099	7.0325
2019-12-09_06:00:00	2019-12-09 16:00:00	1.22	11.69	3.76	0.09	0	0	304.82	4.8	1.13	31.67	4.93122	256.753	53.2		2.9	287.6	66.6	1747																	2444.31	2444.31			1002.99	1002.99			4.12584	9.18828
2019-12-09_07:00:00	2019-12-09 17:00:00	1.3	16.95	8.2	0.37	0	0	303.81	1.12	2.68	30.66	2.90462	202.681	40.1	31.5	2.6	265	52	2183																	1017.61	3294.76			0.7056	407.232			0.0927915	0.496485
2019-12-09_08:00:00	2019-12-09 18:00:00	0.85	37.02	28.6	1.72	0	0	299.66	-0.93	0.96	26.51	1.3366	135.909	35.2	30.8	2	294	46.5	2581																	43.56	1755.61			18.4041	235.009			0.440099	2.14154
2019-12-09_09:00:00	2019-12-09 19:00:00	0.84	24.61	17.21	0.97	0	0	296.25	-0.85	-2.75	23.1	2.87837	17.176	117	27.6	1.9	129.8	130.6	2792																	9958.04	9958.04			20.25	76.0384			0.957203	0.957203
2019-12-09_10:00:00	2019-12-09 20:00:01	0.83	15.08	8.62	0.41	0	0	296.14	-0.58	-5.05	22.99	5.0832	6.55188	442.5	24.5	1.9	117.6	463.7	2840																	188252	188252			2.2801	30.3601			10.1327	10.1327
2019-12-09_11:00:00	2019-12-09 21:00:01	0.72	25.37	18.41	1.05	0	0	295.88	-0.39	-5.24	22.73	5.25449	4.25661	252	22.7	1.5	121.6	271.4	1823																	54564.3	54564.3			0.0009	11.9025			14.0962	14.0962
2019-12-09_12:00:00	2019-12-09 22:00:01	0.56	87.38	76	4.7	0.01	0.01	295.51	-0.37	-5.72	22.36	5.73195	3.70112	193.7	21.3	1.4	117.7	211.1	1790																	13853.3	26896			1.1236	2.8224			18.7658	18.7658
2019-12-09_13:00:00	2019-12-09 23:00:01	0.43	91.19	80.1	4.85	0.01	0.01	295.24	0.06	-5.97	22.09	5.9703	359.424	182.4	20	1	111.8	199.3	1752																	10465.3	24586.2			4.3681	4.3681			24.7039	24.7039
2019-12-09_14:00:00	2019-12-10 00:00:01	0.52	68.55	58.62	3.45	0.01	0	295.35	1.19	-5.7	22.2	5.82289	348.208	216.1	18.9	0.8	103.5	233.7	1785																	24800	28567.8			10.89	10.89			25.2295	25.2295
2019-12-09_15:00:00	2019-12-10 01:00:01	0.34	53.54	45.96	2.64	0.01	0	295.09	2.26	-5.82	21.94	6.2434	338.778	239.5	18	0.4	81.5	259.5	1522																	37457.7	37457.7			15.5236	15.5236			34.1453	34.1453
2019-12-09_16:00:00	2019-12-10 02:00:01	0.11	38.34	33.39	1.86	0	0	294.98	3.66	-6.16	21.83	7.16528	329.283	224	16.5	0.1	16.9	240	1304																	36332.2	36332.2			28.4089	28.4089			49.9181	49.9181
2019-12-09_17:00:00	2019-12-10 03:00:01	0.11	15.65	12.15	0.56	0	0	294.46	4.32	-6.56	21.31	7.85468	326.634	209.2	15.6	0.6	331.7	223.4	1250																	38828.7	38828.7			32.6041	32.6041			52.6304	52.6304
2019-12-09_18:00:00	2019-12-10 04:00:01	0.11	11.59	8.14	0.3	0	0	294.02	4.85	-6.56	20.87	8.15819	323.523	198.3	14.8	0.4	322.3	212.7	9325																	36160.8	36160.8			36.8449	39.8161			60.1895	60.1895
2019-12-09_19:00:00	2019-12-10 05:00:01	0.06	11.45	8.29	0.28	0	0	293.62	5.59	-6.33	20.47	8.44494	318.552	198.4	14.3	0.6	325.6	214.1	8704																	36141.8	36141.8			38.0689	51.9841			61.5431	61.5431
2019-12-09_20:00:00	2019-12-10 06:00:01	0.07	10.65	7.92	0.28	0	0	295.71	7.18	-5.79	22.56	9.22369	308.883	196.5	14.8	1.1	309.3	211.7	7068																	35562.4	35562.4			60.2176	60.2176			65.9944	65.9944
2019-12-09_21:00:00	2019-12-10 07:00:01	0.05	10.73	8.18	0.28	0	0	297.95	6.54	-5.37	24.8	8.46218	309.389	131.6	22	3.8	302.9	148.2	7293																	15232.5	15232.5			7.84	23.2324			21.7359	55.6841
2019-12-09_22:00:00	2019-12-10 08:00:01	0.55	12.9	6.37	0.2	0	0	300.69	7.43	-4.71	27.54	8.7971	302.371	35.8	24.8	4.6	301.8	54.2	7147																	866.125	4036.06			7.5076	107.33			17.6157	73.9102
2019-12-09_23:00:00	2019-12-10 09:00:01	3.77	33.76	8.94	0.13	0	0	302.6	8.18	-2.77	29.45	8.63628	288.708	27	26.8	4.9	293	46.4	8323																	326.164	4866.46			7.0225	203.633			13.9598	76.3226
2019-12-10_00:00:00	2019-12-10 10:00:01	6.75	51.86	12.32	0.1	0	0	303.4	8.22	-1.46	30.25	8.34865	280.072	27	28.7	4.3	282.8	45.1	7608																	215.502	4406.3			2.4025	287.981			16.3916	61.6013
2019-12-10_01:00:00	2019-12-10 11:00:01	8.41	62.47	14.55	0.1	0	0	304.01	7.8	-0.74	30.86	7.83502	275.42	31.8	29.8	4	283.4	49.4	7627																	297.562	3522.42			1.1236	348.942			14.7074	49.4916
2019-12-10_02:00:00	2019-12-10 12:00:01	9.51	69.96	16.15	0.11	0	0	304.72	7.44	-0.16	31.57	7.44172	271.232	32	30.7	3.9	260.2	52.1	6787																	251.223	3312			0.7569	411.684			12.5438	42.7941
2019-12-10_03:00:00	2019-12-10 13:00:01	11.04	79.69	18.19	0.11	0	0	305.29	7.24	0.2	32.14	7.24276	268.418	22.7	31.6	3.5	276.9	40.7	7031																	20.3401	4200.34			0.2916	473.498			14.0083	35.3164
2019-12-10_04:00:00	2019-12-10 14:00:01	11	79.13	18.29	0.12	0	0	305.72	7.17	0.25	32.57	7.17436	268.003	26.5		3.3	267.1	43.1	6933																	67.4041	3710.03			1060.8	1060.8			15.0106	32.1983
2019-12-10_05:00:00	2019-12-10 15:00:01	11.89	85.3	19.37	0.12	0	0	306.04	6.81	0.13	32.89	6.81124	268.906		32.5	3.5	270.1		6654																	375.197	7452.87			0.1521	548.028			10.9643	30.3738
2019-12-10_06:00:00	2019-12-10 16:00:01	17.57	119.67	25.55	0.07	0	0	305.99	6.99	0.02	32.84	6.99003	269.836		31.5	2.9	269.3		1868																	652.803	6424.02			1.7956	499.97			16.7283	25.9084
2019-12-10_07:00:00	2019-12-10 17:00:01	16.93	115.24	24.16	0.04	0	0	303.57	3.04	1.37	30.42	3.33444	245.741	25.6	31.5	3.7	294	43	1248																	2.0736	3129.28			1.1664	397.604			0.133633	4.99273
2019-12-10_08:00:00	2019-12-10 18:00:01	16.11	119.98	32.53	0.66	0	0	300.32	-1.16	1.86	27.17	2.19208	148.05	20.8	31.6	2.9	281.9	39	1106																	137.593	2742.62			19.6249	281.904			0.501155	0.501155
2019-12-10_09:00:00	2019-12-10 19:00:01	13.39	118.18	43.03	1.52	0	0	296.31	-2.44	-0.72	23.16	2.54401	73.5598	17.9	29.7	1.8	256.9	36.3	1206																	631.517	2004.35			42.7716	118.374			0.553555	0.553555
2019-12-10_10:00:00	2019-12-10 20:00:01	12.73	102.28	31.26	0.78	0	0	295.59	-1.97	-3.4	22.44	3.92949	30.0886	14.8	26.5	2	173.8	32.3	1323																	270.932	3556.93			16.4836	48.4416			3.72294	3.72294
2019-12-10_11:00:00	2019-12-10 21:00:01	12.83	104.25	32.86	0.87	0	0	294.35	-1.01	-2.7	21.2	2.88272	20.5096	155.2	25.9	0.9	72.9	174.7	1071																	14967.1	14967.1			22.09	26.2144			3.9312	3.9312
2019-12-10_12:00:00	2019-12-10 22:00:01	12.64	106.16	34.45	0.96	0	0	293.39	-0.97	-2.44	20.24	2.62574	21.6799	177.2	25.2	1.2	8.7	194	892																	20377.6	20377.6			24.6016	24.6016			2.03273	2.03273
2019-12-10_13:00:00	2019-12-10 23:00:01	9.4	100.96	40.05	1.34	0	0	291.67	-1.85	0.64	18.52	1.95758	109.083	62.7	23.4	0.3	210.7	72.9	890																	513.023	513.023			23.8144	23.8144			2.74755	6.46392
2019-12-10_14:00:00	2019-12-11 00:00:01	6.81	91.22	39.12	1.31	0	0	289.88	-1.88	0.78	16.73	2.03539	112.533	122.5	23.6	1.5	183.9	134.3	890																	6952.22	6952.22			47.1969	47.1969			0.286639	1.59925
2019-12-10_15:00:00	2019-12-11 01:00:01	6.51	87.31	37.14	1.24	0	0	289.09	-1.98	0.55	15.94	2.05497	105.524	138.4	24.2	2.1	156.5	157.2	890																	10253.6	10253.6			68.2276	68.2276			0.00202774	0.416064
2019-12-10_16:00:00	2019-12-11 02:00:01	5.28	81.22	35.34	1.14	0	0	288.49	-2.5	1.75	15.34	3.05164	124.992	40.8	23.8	2.5	357	54.1	870																	29.8116	873.794			71.5716	71.5716			0.304305	0.564961
2019-12-10_17:00:00	2019-12-11 03:00:01	4.35	75.19	32.37	0.98	0	0	287.8	-2.58	0.95	14.65	2.74935	110.214	8.4	22.5	1.1	326.6	13.2	824																	574.561	4215.9			61.6225	61.6225			2.72034	2.72034
2019-12-10_18:00:00	2019-12-11 04:00:01	4.34	74.32	31.58	0.95	0	0	286.95	-2.03	-0.22	13.8	2.04189	83.8149	9.3	20.5	0.4	98	13.4	703																	496.398	4201.63			44.89	58.9824			2.69579	5.5607
2019-12-10_19:00:00	2019-12-11 05:00:01	4.81	76.87	32.58	1.02	0	0	286.84	-1.92	-0.92	13.69	2.12904	64.3979	12.2	18.9	0.2	312.6	18.4	1670																	415.344	3711.25			27.1441	88.1721			3.72119	6.10566
2019-12-10_20:00:00	2019-12-11 06:00:01	4.8	77.49	32.79	1.02	0	0	289.59	-2.16	0.33	16.44	2.18506	98.6862	17.6	18.3	0.2	14	26.2	8399																	230.736	3059.2			3.4596	52.4176			3.94047	5.83192
2019-12-10_21:00:00	2019-12-11 07:00:01	4.8	76.93	31.9	0.96	0	0	291.64	-1.7	0.4	18.49	1.74642	103.24	23.2	21.2	0.4	137.3	38.7	1694																	75.69	2560.36			7.3441	7.3441			1.81286	7.04146
2019-12-10_22:00:00	2019-12-11 08:00:01	5.6	77.9	30.91	0.94	0	0	295.62	-1.55	-1.35	22.47	2.05548	48.9453	48.8	24.8	0.9	281.7	69	2963																	320.052	675.48			5.4289	27.9841			1.33514	3.40225
2019-12-10_23:00:00	2019-12-11 09:00:01	6.86	77.04	26.8	0.7	0	0	298.94	-0.11	1.67	25.79	1.67362	176.231		28.8	2.8	302.5		5798																	718.24	6225.21			9.0601	159.012			1.26873	1.26873
2019-12-11_00:00:00	2019-12-11 10:00:01	5.27	74.63	28.11	0.74	0	0	298.29	-1.61	3.24	25.14	3.61797	153.576		30.8	3.7	291.5		2102																	790.172	6020.21			32.0356	194.882			0.00672908	6.34017
2019-12-11_01:00:00	2019-12-11 11:00:01	6.42	74.71	25.85	0.61	0	0	299.77	-0.18	0.64	26.62	0.664831	164.291	12.4	32.3	4.1	298.3	26.9	479																	180.903	4549.5			32.2624	286.964			11.8004	11.8004
2019-12-11_02:00:00	2019-12-11 12:00:01	7.65	75.64	24.4	0.51	0	0	300.17	0.17	0.72	27.02	0.739797	193.285	12.7	33.2	4.3	305.5	28.6	404																	136.89	4705.96			38.1924	332.698			12.675	12.675
2019-12-11_03:00:00	2019-12-11 13:00:01	4.06	74.35	30.59	0.9	0	0	298.02	-3.63	2.78	24.87	4.57223	127.446	9.6	33.4	3.7	282	29	573																	440.58	4291.56			72.7609	265.364			0.760788	12.0564
2019-12-11_04:00:00	2019-12-11 14:00:01	6.13	74.08	26.69	0.66	0	0	298.65	-1.95	-1.58	25.5	2.50976	50.9838	11.9	30.2	4.1	260.6	34.3	779																	218.744	4503.75			22.09	188.238			2.52886	3.27523
2019-12-11_05:00:00	2019-12-11 15:00:01	5.71	73.48	27.87	0.75	0	0	297.23	-2.34	-0.81	24.08	2.47623	70.9066	12.3	24.2	3.5	316.4	39	1333																	242.425	4294.18			0.0144	39.69			1.04811	1.38351
2019-12-11_06:00:00	2019-12-11 16:00:01	4.46	76.36	33.79	1.14	0	0	296.58	-3.95	-0.64	23.43	4.00151	80.7968	4.9	24	3.5	330.2	17.8	2541																	834.632	4490.34			0.3249	29.7025			0.251515	7.29817
2019-12-11_07:00:00	2019-12-11 17:00:01	2.13	83.9	45.55	1.9	0	0	295.79	-3.46	-2.28	22.64	4.14367	56.6169	9.9	21.4	3.2	332.9	18.1	2365																	1270.92	2525.06			1.5376	4.2436			0.890513	6.47026
2019-12-11_08:00:00	2019-12-11 18:00:01	0.78	64.55	31.88	1.02	0	0	293.34	-4.46	2.28	20.19	5.00899	117.076	0.6	20.8	1.3	83.6	6.1	764																	978.438	5361.17			0.3721	0.9801			13.7566	13.7566
2019-12-11_09:00:00	2019-12-11 19:00:01	0.34	53.94	24.25	0.53	0	0	290.6	-4.48	2.19	17.45	4.98663	116.051	-1	18.4	1.7	28.3	2.8	518																	637.562	6798			0.9025	37.5769			10.802	10.802
2019-12-11_10:00:00	2019-12-11 20:00:01	0.33	51.47	21.7	0.36	0	0	290.55	-4.15	0.93	17.4	4.25293	102.631	27.7	18.6	0.7	112.9	30.9	514																	36	3169.69			1.44	35.7604			12.6233	12.6233
2019-12-11_11:00:00	2019-12-11 21:00:01	0.48	49.93	19.83	0.23	0	0	290.08	-3.55	0.21	16.93	3.55621	93.3852	15.2	18.7	1.7	116.7	17.4	531																	21.4369	4994.25			3.1329	40.3225			3.4455	3.4455
2019-12-11_12:00:00	2019-12-11 22:00:01	0.84	51.62	19.85	0.21	0	0	289.94	-3.03	-0.87	16.79	3.15243	73.9798	11.4	17.7	0.8	107.5	13.3	583																	71.4025	5542.8			0.8281	56.1001			5.53392	5.53392
2019-12-11_13:00:00	2019-12-11 23:00:01	1.24	54.39	20.99	0.27	0	0	289.06	-2.23	-0.49	15.91	2.2832	77.6074	9.6	18.8	0.9	25.1	11.5	676																	129.732	5641.51			8.3521	52.8529			1.91324	2.61404
2019-12-11_14:00:00	2019-12-12 00:00:01	1.76	57.7	22.24	0.32	0	0	288.1	-2.02	-0.1	14.95	2.02247	87.166	10.1	18.5	0.3	30.9	11.6	931																	147.38	5381.69			12.6025	72.7609			2.96692	6.13814
2019-12-11_15:00:00	2019-12-12 01:00:01	2.24	60.1	22.97	0.34	0	0	287.48	-1.93	-0.49	14.33	1.99123	75.7545	11.2	19	0.6	317.2	12.6	492																	138.533	5116.54			21.8089	74.8225			1.93552	4.87866
2019-12-11_16:00:00	2019-12-12 02:00:01	3.05	63.08	23.78	0.38	0	0	286.95	-1.89	-0.78	13.8	2.04463	67.5743	13.2	17	0.5	134.6	14.9	385																	111.936	4722.44			10.24	124.992			2.38587	5.08671
2019-12-11_17:00:00	2019-12-12 03:00:01	3.39	62.11	23.09	0.35	0	0	286.6	-1.31	-0.66	13.45	1.46687	63.2604	16.7	16.1	0.7	330	17.8	517																	40.8321	4344.13			7.0225	154.505			0.588086	6.93339
2019-12-11_18:00:00	2019-12-12 04:00:01	3.05	56.56	21.1	0.27	0	0	286.54	0.15	-1.21	13.39	1.21926	352.933	11.6	14.7	0.7	334.7	13.5	888																	90.25	5329			1.7161	192.932			0.269633	8.29865
2019-12-11_19:00:00	2019-12-12 05:00:01	2.55	49.87	19.21	0.23	0	0	286.86	1.56	-2.29	13.71	2.77087	325.736	10.4	13.6	0.3	350.3	12.3	782																	77.6161	5789.69			0.0121	215.209			6.10518	6.10518
2019-12-11_20:00:00	2019-12-12 06:00:01	2.11	44.31	17.88	0.23	0	0	291.18	2.87	-3.06	18.03	4.19529	316.835	15.1	14	0.9	120.7	17.3	506																	7.7284	5288.2			16.2409	99.0025			10.859	10.859
2019-12-11_21:00:00	2019-12-12 07:00:01	1.72	38.41	16.29	0.23	0	0	293.25	4.29	-3.69	20.1	5.65864	310.7	14.4	17.9	1.2	116.7	18.6	474																	3.5721	5626.5			4.84	15.8404			19.8795	19.8795
2019-12-11_22:00:00	2019-12-12 08:00:01	1.5	34.88	15.4	0.24	0	0	294.73	5.09	-2.86	21.58	5.83847	299.331	11.9	21.7	0.7	234.1	17.2	395																	12.25	6146.56			0.0144	1.69			26.4038	26.4038
2019-12-11_23:00:00	2019-12-12 09:00:01	1.38	33.11	15.12	0.26	0	0	296.05	5.32	-1.05	22.9	5.42263	281.165	15.9	24.3	3.2	292.8	20.2	419																	0.6084	5577.1			1.96	27.2484			4.94008	14.6125
2019-12-12_00:00:00	2019-12-12 10:00:01	1.22	30.76	14.68	0.28	0	0	297.23	5.08	-0.29	24.08	5.08827	273.267	15.9	25.5	3.8	299.5	21.2	401																	1.4884	5643.01			2.0164	57.76			1.65964	16.714
2019-12-12_01:00:00	2019-12-12 11:00:01	1.04	27.35	13.47	0.27	0	0	298.28	5.28	-0.03	25.13	5.28009	270.326	15.2	26.3	3.8	304.2	21	412																	2.9929	5933.62			1.3689	89.3025			2.19065	18.3191
2019-12-12_02:00:00	2019-12-12 12:00:01	0.99	26.09	12.89	0.26	0	0	299.13	5.79	-0.18	25.98	5.7928	271.781	13	27.6	3.5	289.1	20.4	423																	0.0121	6369.64			2.6244	134.56			5.25692	20.1852
2019-12-12_03:00:00	2019-12-12 13:00:01	0.94	25.72	12.8	0.27	0	0	299.87	5.96	0.13	26.72	5.96142	268.75	12.6	28.8	3.6	289.8	22.9	418																	0.04	6448.09			4.3264	183.332			5.57629	22.6711
2019-12-12_04:00:00	2019-12-12 14:00:01	0.77	23.91	12.08	0.25	0	0	300.29	6.15	1.38	27.14	6.30293	257.353	10.5	30.1	3.7	291.6	23.7	513																	2.4964	6908.93			8.7616	232.868			6.77523	27.0705
2019-12-12_05:00:00	2019-12-12 15:00:01	0.69	24.63	12.39	0.25	0	0	300.26	5.34	2.23	27.11	5.78692	247.334	9.5	30.6	3.5	286.3	24	1099																	8.3521	7024.12			12.1801	247.433			5.23003	20.1325
2019-12-12_06:00:00	2019-12-12 16:00:01	0.48	19.59	9.94	0.21	0	0	300	3.03	3.83	26.85	4.88363	218.348	12.5	30.4	2.7	300.1	27.5	1281																	6.5536	6932.23			12.6025	233.173			4.76822	7.74857
2019-12-12_07:00:00	2019-12-12 17:00:01	0.53	28.24	11.31	0.12	0	0	296.79	-1.58	4.94	23.64	5.18652	162.264	42.9	24.3	5.5	135.8	62.7	818																	997.928	2651.22			0.4356	35.5216			0.0982691	34.6511
2019-12-12_08:00:00	2019-12-12 18:00:01	0.67	39.65	14.46	0.09	0	0	293.69	-4.51	3.43	20.54	5.66613	127.254	104.2	20.3	5.6	135.5	131	611																	8053.27	8053.27			0.0576	1.2996			0.00437284	41.8108
2019-12-12_09:00:00	2019-12-12 19:00:01	0.71	40.53	14.92	0.1	0	0	291.77	-3.51	0.65	18.62	3.56968	100.491	79.5	18.6	4	120.3	91.8	790																	4170.58	4170.58			0.0004	22.6576			0.185177	7.67112
2019-12-12_10:00:00	2019-12-12 20:00:01	0.71	43	15.78	0.09	0	0	290.52	-3.33	-0.59	17.37	3.38186	79.9529	64.4	18.2	3.7	120.8	69.9	711																	2363.9	2363.9			0.6889	41.0881			0.101211	5.2069
2019-12-12_11:00:00	2019-12-12 21:00:01	0.72	42.83	15.9	0.09	0	0	290.96	-3.73	-1.17	17.81	3.90919	72.5849	44.3	17.9	4.4	123.9	47.4	707																	806.56	2070.25			0.0081	39.3129			0.24089	12.3144
2019-12-12_12:00:00	2019-12-12 22:00:01	0.75	42.46	16.07	0.1	0	0	290.73	-3.39	-2.32	17.58	4.10786	55.6137	36.8	17.3	4.3	123.2	38.6	589																	429.733	2791.01			0.0784	50.41			0.0369184	13.0166
2019-12-12_13:00:00	2019-12-12 23:00:01	0.75	41.79	16.08	0.11	0	0	290.29	-2.9	-2.77	17.14	4.01035	46.3135	28.2	17.2	3.1	120.2	29.6	505																	146.894	3772.42			0.0036	58.3696			0.828736	5.33771
2019-12-12_14:00:00	2019-12-13 00:00:01	0.75	41.15	16.04	0.12	0	0	289.89	-2.11	-2.21	16.74	3.05552	43.6741	29.1	17.2	1.9	114.1	31.7	565																	170.564	3667.51			0.2116	64.6416			1.33523	1.33523
2019-12-12_15:00:00	2019-12-13 01:00:01	0.77	41.04	16.15	0.12	0	0	289.2	-1.76	-2.24	16.05	2.84872	38.1573	30.1	17.3	2	119.3	34.3	934																	194.603	3534.3			1.5625	74.4769			0.720324	0.720324
2019-12-12_16:00:00	2019-12-13 02:00:01	0.82	40.94	16.26	0.12	0	0	288.49	-1.46	-1.09	15.34	1.822	53.256	30.9	17.3	2.4	120.5	34.4	2983																	214.33	3426.93			3.8416	87.2356			0.334079	0.334079
2019-12-12_17:00:00	2019-12-13 03:00:01	0.84	41.11	16.3	0.12	0	0	287.82	-2.01	-0.26	14.67	2.02675	82.6297	25.2	17.1	2.4	121.6	27.6	2030																	79.21	4121.64			5.9049	104.244			0.139318	0.139318
2019-12-12_18:00:00	2019-12-13 04:00:01	0.93	40.75	16.48	0.13	0	0	287.31	-1.82	-0.89	14.16	2.02596	63.941	21.2	17	2.7	119.6	22.6	1527																	22.2784	4626.72			8.0656	117.072			0.454335	0.454335
2019-12-12_19:00:00	2019-12-13 05:00:01	1.01	40.27	16.65	0.14	0	0	286.91	-1.85	-1.33	13.76	2.27846	54.287	21.2	16.5	2.5	120.6	22.5	1147																	20.7025	4603.62			7.5076	137.358			0.049078	0.049078
2019-12-12_20:00:00	2019-12-13 06:00:01	1.05	39.74	16.74	0.14	0	0	289.35	-1.72	-2.63	16.2	3.1425	33.1845	13.2	16.3	3.2	122.6	14.4	910																	12.5316	5739.58			0.01	89.8704			0.00330636	2.3793
2019-12-12_21:00:00	2019-12-13 07:00:01	1.04	38.1	16.46	0.15	0	0	291.36	-0.77	-2.25	18.21	2.37811	18.8922	5.8	16	3.3	121.6	7.5	596																	113.636	6962.23			4.8841	60.3729			0.849884	0.849884
2019-12-12_22:00:00	2019-12-13 08:00:01	0.96	35.82	15.95	0.15	0	0	292.85	0.58	-0.58	19.7	0.820244	315	7.5	16.2	2.8	118.5	9.5	574																	71.4025	6765.06			12.25	36.9664			3.91943	3.91943
2019-12-12_23:00:00	2019-12-13 09:00:01	0.88	33.96	15.44	0.16	0	0	293.66	0.99	1.01	20.51	1.41428	224.427	9.6	16.8	3.5	122.3	11.7	557																	34.1056	6506.04			13.7641	21.8089			4.35021	4.35021
2019-12-13_00:00:00	2019-12-13 10:00:01	0.79	31.08	14.2	0.15	0	0	294.74	1.31	2.58	21.59	2.89353	206.919	11.5	18.8	3.7	124.3	13.6	507																	7.29	6400			7.7841	7.7841			0.650398	3.21674
2019-12-13_01:00:00	2019-12-13 11:00:01	0.59	24.3	11.46	0.13	0	0	296.52	2.32	2.96	23.37	3.76085	218.089	15.2	21.4	3.9	125.6	18	488																	13.9876	6247.32			3.8809	7.7841			0.0193625	8.18447
2019-12-13_02:00:00	2019-12-13 12:00:01	0.66	27.33	12.46	0.14	0	0	295.8	0.33	3.56	22.65	3.57526	185.296	12.6	21.7	5.3	132.4	16.3	394																	0.0196	6502.81			0.9025	5.6169			2.97472	16.6078
2019-12-13_03:00:00	2019-12-13 13:00:01	0.68	27.89	12.55	0.13	0	0	295.56	-0.27	3.83	22.41	3.83951	175.967	17.3	20.8	4.4	124.7	21.2	368																	22.5625	5753.22			2.5921	2.5921			0.314154	11.8302
2019-12-13_04:00:00	2019-12-13 14:00:01	0.63	29.07	12.69	0.12	0	0	294.99	-1.57	4.23	21.84	4.51196	159.637	22.9	19.8	4.9	127.5	26.8	261																	104.244	4915.41			4.1616	4.1616			0.150574	21.2702
2019-12-13_05:00:00	2019-12-13 15:00:01	0.44	29.65	13.05	0.11	0	0	293.79	-3.67	2.89	20.64	4.6713	128.219	30.1	22.1	3.1	120	34.2	150																	290.703	3912.5			2.1316	2.1316			2.46897	8.8286
2019-12-13_06:00:00	2019-12-13 16:00:01	0.4	30.17	13.56	0.11	0	0	292.87	-3.84	2.23	19.72	4.44055	120.145	17.9	21.2	1.4	44	22.4	151																	18.8356	5511.58			2.1904	2.1904			9.24496	9.24496
2019-12-13_07:00:00	2019-12-13 17:00:01	0.45	30.79	13.85	0.12	0	0	292.38	-3.94	1.26	19.23	4.13657	107.734	15.4	21.8	2.6	107.4	18.6	216																	2.4025	5844.6			6.6049	6.6049			2.36104	3.7503
2019-12-13_08:00:00	2019-12-13 18:00:01	0.29	29.63	13.89	0.11	0	0	290.96	-4.55	-0.17	17.81	4.55317	87.8604	23.9	18.2	5.3	125.5	27.8	157																	100.2	4611.77			0.1521	35.6409			0.557748	25.5346
2019-12-13_09:00:00	2019-12-13 19:00:01	0.17	27.66	13.56	0.11	0	0	289.09	-3.76	1.19	15.94	3.94382	107.562	44.9	16.1	4.1	122	49	192																	982.196	2231.62			0.0256	98.8036			0.0243928	10.5224
2019-12-13_10:00:00	2019-12-13 20:00:01	0.15	27.04	13.38	0.11	0	0	288.85	-3.39	0.48	15.7	3.42381	98.059	42.8	15.9	2.9	119.5	46.5	248																	865.536	2452.23			0.04	107.744			0.274381	2.32201
2019-12-13_11:00:00	2019-12-13 21:00:01	0.16	27.25	13.48	0.12	0	0	289.12	-3.32	-0.37	15.97	3.34055	83.641	29.8	15.7	3.2	121.4	32	318																	266.342	3896.26			0.0729	106.296			0.0197554	3.02953
2019-12-13_12:00:00	2019-12-13 22:00:01	0.18	27.32	13.54	0.13	0	0	289.07	-2.61	-0.8	15.92	2.72985	72.9591	19.7	15.7	2.9	122.5	21.3	430																	37.9456	5250.45			0.0484	107.33			0.0289498	0.688657
2019-12-13_13:00:00	2019-12-13 23:00:01	0.22	27.61	13.71	0.14	0	0	287.53	-1.81	-0.98	14.38	2.05828	61.5674	14.3	15.6	3	121.4	15.9	619																	0.3481	6035.74			1.4884	144			0.886844	0.886844
2019-12-13_14:00:00	2019-12-14 00:00:01	0.26	27.53	13.72	0.15	0	0	288.06	-1.87	-2.02	14.91	2.75269	42.7919	14.4	15.5	2.2	119.5	16	445																	0.4624	6018.66			0.3481	133.865			0.305466	0.305466
2019-12-13_15:00:00	2019-12-14 01:00:01	0.25	26.44	13.39	0.15	0	0	286.5	-1.56	-2.09	13.35	2.60801	36.7382	13.5	15.4	1.9	119.3	15	579																	0.0121	6211.02			4.2025	175.033			0.501274	0.501274
2019-12-13_16:00:00	2019-12-14 02:00:01	0.26	25.48	13.05	0.15	0	0	285.75	-0.88	-2.33	12.6	2.49064	20.6908	14.2	15.4	2	122.4	15.7	427																	1.3225	6154.4			7.84	195.44			0.24073	0.24073
2019-12-13_17:00:00	2019-12-14 03:00:01	0.26	24.39	12.59	0.15	0	0	285.41	-0.2	-2.58	12.26	2.58774	4.43275	13.5	15.5	1.6	125.3	15.2	655																	0.8281	6337.75			10.4976	202.208			0.975631	0.975631
2019-12-13_18:00:00	2019-12-14 04:00:01	0.26	23.47	12.18	0.14	0	0	285.03	0.2	-2.61	11.88	2.61765	355.618	14.4	14.8	0.7	112.2	16.3	857																	4.9284	6259.97			8.5264	234.09			3.67739	3.67739
2019-12-13_19:00:00	2019-12-14 05:00:01	0.27	23.14	12	0.14	0	0	284.51	0.87	-2.36	11.36	2.51525	339.764	12.1	14.8	1.3	120.5	14.8	590																	0.01	6658.56			11.8336	250.272			1.47684	1.47684
2019-12-13_20:00:00	2019-12-14 06:00:01	0.28	23.37	12.07	0.14	0	0	287.7	1.52	-0.69	14.55	1.66928	294.416	13.5	15.1	1.4	116.6	16.9	416																	2.0449	6420.82			0.3025	152.029			0.0725124	2.99539
2019-12-13_21:00:00	2019-12-14 07:00:01	0.29	23.54	12.07	0.13	0	0	290.2	2.42	1.15	17.05	2.67935	244.583	15	15.5	1.1	108.2	17.7	272																	8.5849	6182.68			2.4025	88.9249			2.49434	2.49434
2019-12-13_22:00:00	2019-12-14 08:00:01	0.24	21.65	11.26	0.12	0	0	291.81	2.74	1.65	18.66	3.19845	238.944	16.2	17.1	0.9	125	18.6	269																	24.4036	6121.5			2.4336	38.6884			5.28289	5.28289
2019-12-13_23:00:00	2019-12-14 09:00:01	0.21	20	10.48	0.11	0	0	293.15	2.81	1.64	20	3.25357	239.731	18.1	20	0.5	202.2	21.9	246																	58.0644	5947.49			0	3.9204			7.58213	7.58213
2019-12-14_00:00:00	2019-12-14 10:00:01	0.16	15.97	8.48	0.09	0	0	294.71	3.49	1.7	21.56	3.88202	244.029	21.1	22.8	1.2	267.9	26.3	251																	159.264	5794.25			1.5376	5.6644			7.19325	7.19325
2019-12-14_01:00:00	2019-12-14 11:00:01	0.13	13.93	7.42	0.08	0	0	295.84	3.78	1.81	22.69	4.191	244.413	29.2	25.2	2.1	282.4	36.5	267																	474.368	4772.05			6.3001	34.9281			4.37229	4.37229
2019-12-14_02:00:00	2019-12-14 12:00:01	0.12	12.71	6.76	0.07	0	0	296.87	3.83	2.12	23.72	4.37759	241.034	24	26.5	3.3	265.5	32.4	262																	297.218	5616			7.7284	67.8976			1.1612	8.28053
2019-12-14_03:00:00	2019-12-14 13:00:01	0.08	9.84	5.24	0.05	0	0	297.74	3.76	2.75	24.59	4.65834	233.819	17.3	27.1	3.6	252.3	24.6	250																	145.444	6915.59			6.3001	94.2841			1.12008	11.9601
2019-12-14_04:00:00	2019-12-14 14:00:01	0.05	7.11	3.85	0.04	0	0	298.42	3.63	3.05	25.27	4.74124	229.962	22.8	27.8	3.1	257	30.5	294																	359.102	6248.9			6.4009	122.988			2.69368	9.24917
2019-12-14_05:00:00	2019-12-14 15:00:01	0.02	5.45	3.01	0.03	0	0	298.8	3.32	3.49	25.65	4.8169	223.57	22.3	28.5	3.3	237.5	28.5	303																	372.104	6462.55			8.1225	148.109			2.30098	11.0018
2019-12-14_06:00:00	2019-12-14 16:00:01	0.01	4.22	2.31	0.03	0	0	298.81	3.22	3.59	25.66	4.8225	221.89	16.1	28.6	2.6	254	22.2	328																	190.164	7619.54			8.6436	150.798			4.9395	6.8775
2019-12-14_07:00:00	2019-12-14 17:00:01	0.01	4.44	2.46	0.04	0	0	298.31	1.83	4.17	25.16	4.55388	203.694	11.4	28.5	3.4	267.8	18.5	379																	79.9236	8434.59			11.1556	136.422			1.33143	9.94694
2019-12-14_08:00:00	2019-12-14 18:00:01	0.09	13.84	7.51	0.1	0	0	295.47	-2.46	3.94	22.32	4.64491	148.021	10.1	27.8	2.9	264	17.7	481																	6.7081	7759.85			30.0304	66.2596			3.04472	7.53454
2019-12-14_09:00:00	2019-12-14 19:00:01	0.17	21.19	10.9	0.12	0	0	292.16	-2.59	0.33	19.01	2.61094	97.261	11.8	26.2	1.9	261.5	19.7	669																	0.81	6889			51.6961	51.6961			0.505434	0.505434
2019-12-14_10:00:00	2019-12-14 20:00:01	0.23	25.83	13.66	0.25	0	0	290.68	-1.43	-1.99	17.53	2.45051	35.7009	15.9	24	0.8	284.6	26	798																	5.0176	5797.3			41.8609	41.8609			2.72418	2.72418
2019-12-14_11:00:00	2019-12-14 21:00:01	0.28	29.23	16.29	0.38	0	0	290.21	-1.13	-3.7	17.06	3.86871	16.983	16.5	21.5	0.8	94.2	26.4	576																	0.0441	5315.87			19.7136	19.7136			9.41697	9.41697
2019-12-14_12:00:00	2019-12-14 22:00:01	0.27	26.19	14.25	0.28	0	0	289.84	-0.92	-4.86	16.69	4.94631	10.7194	24.7	19.8	1.7	120.2	34.1	630																	109.202	4455.56			9.6721	30.1401			10.5385	10.5385
2019-12-14_13:00:00	2019-12-14 23:00:01	0.25	22.75	12.41	0.23	0	0	289.33	0.02	-4.8	16.18	4.80004	359.761	31.1	19	0.8	107.9	38.7	701																	349.316	3867.6			7.9524	46.24			16.0003	16.0003
2019-12-14_14:00:00	2019-12-15 00:00:01	0.18	16.87	9.57	0.18	0	0	289.02	1.25	-4.08	15.87	4.26719	342.966	31	18.3	1	106.1	38.2	494																	459.245	4241.92			5.9049	60.9961			10.6745	10.6745
2019-12-14_15:00:00	2019-12-15 01:00:01	0.09	10.31	6.26	0.14	0	0	288.38	2.39	-2.17	15.23	3.22816	312.238	28.4	17.2	0.5	101.7	36.1	343																	490.18	5046.68			3.8809	91.2025			7.44284	7.44284
2019-12-14_16:00:00	2019-12-15 02:00:01	0.06	12.8	9.31	0.36	0	0	287.79	2.96	-0.94	14.64	3.10567	287.618	25.3	16.8	0.7	98.8	33.5	287																	255.68	5053.79			4.6656	111.092			5.78726	5.78726
2019-12-14_17:00:00	2019-12-15 03:00:01	0.04	20.01	16.38	0.8	0	0	287.16	2.79	-0.33	14.01	2.80945	276.746	25.8	15.8	0.7	102.8	34	283																	88.7364	4034.79			3.2041	148.109			4.44977	4.44977
2019-12-14_18:00:00	2019-12-15 04:00:01	0.03	27.74	23.69	1.23	0	0	286.54	2.46	0.39	13.39	2.49072	260.991	26.3	15	0.9	118.5	33.6	395																	6.8121	3103.6			2.5921	184.688			2.5304	2.5304
2019-12-14_19:00:00	2019-12-15 05:00:01	0.02	34.64	30.22	1.6	0	0	286.01	2.07	-0.05	12.86	2.0706	271.384	23.8	14.7	0.6	112.6	30.3	707																	41.2164	2670.82			3.3856	207.936			2.16268	4.53433
2019-12-14_20:00:00	2019-12-15 06:00:01	0.01	36.23	31.89	1.69	0	0	290.03	1.45	-0.92	16.88	1.71724	302.394	26	14.6	0.5	117.8	32.5	2562																	34.6921	2285.8			5.1984	110.25			1.48166	6.67067
2019-12-14_21:00:00	2019-12-15 07:00:01	0.01	32.35	28.68	1.52	0	0	293.31	1.32	0.53	20.16	1.42243	248.124	20.9	16.5	1.6	120.1	28.4	1221																	60.5284	3149.45			13.3956	28.3024			0.031532	3.15976
2019-12-14_22:00:00	2019-12-15 08:00:01	0	12.64	11.15	0.58	0	0	294.86	2.64	1.29	21.71	2.93832	243.958	24.7	19.7	2.1	131.3	31.5	845																	183.602	4879.02			4.0401	4.0401			0.702773	0.702773
2019-12-14_23:00:00	2019-12-15 09:00:01	0	7.75	6.76	0.34	0	0	296.08	4.08	1.37	22.93	4.30387	251.439	26.5	23.5	1	206.8	34.4	679																	389.668	5247.55			0.3249	19.8025			10.9156	10.9156
2019-12-15_00:00:00	2019-12-15 10:00:01	0	6.95	6	0.3	0	0	297.11	5.07	1.41	23.96	5.26241	254.458	24.2	26.6	2.2	291.2	33.3	716																	331.24	5700.25			6.9696	73.6164			9.37838	9.37838
2019-12-15_01:00:00	2019-12-15 11:00:01	0	0.01	0	0	0	0	299.83	4.83	-0.47	26.68	4.85281	275.558	20.1	28	3.7	271	29.7	696																	404.01	7327.36			1.7424	161.29			1.32898	14.0836
2019-12-15_02:00:00	2019-12-15 12:00:01	0	0.06	0.06	0	0	0	300.74	6.16	0.41	27.59	6.17363	266.192	31.8	28.7	3.9	272.9	41.4	777																	1007.43	5452.35			1.2321	204.776			5.16939	27.8112
2019-12-15_03:00:00	2019-12-15 13:00:01	0	0.15	0.14	0.01	0	0	301.14	5.93	0.81	27.99	5.98506	262.222	28.8	29.6	3.7	280.9	38.3	718																	821.396	5892.1			2.5921	243.672			5.22152	23.8639
2019-12-15_04:00:00	2019-12-15 14:00:01	0	0.73	0.67	0.04	0	0	301.75	5.84	1.87	28.6	6.13209	252.245	39.7	30.2	4.1	259.1	50.7	764																	1523.34	4268.01			2.56	282.912			4.12938	29.5076
2019-12-15_05:00:00	2019-12-15 15:00:01	0	0.74	0.68	0.04	0	0	301.91	5.88	2.68	28.76	6.46195	245.497	44.3	30.3	4.3	271.1	53	848																	1902.7	3686.92			2.3716	291.726			4.67403	35.5448
2019-12-15_06:00:00	2019-12-15 16:00:01	0	0.45	0.41	0.03	0	0	301.72	5.59	3.3	28.57	6.49139	239.445	58.9	30.2	4.2	272.7	69.1	958																	3421.08	3421.08			2.6569	281.904			5.25045	34.7084
2019-12-15_07:00:00	2019-12-15 17:00:01	0	0.39	0.35	0.02	0	0	301.14	4.9	2.88	27.99	5.6837	239.555	48.2	29.7	3.6	263.2	58.2	716																	2289.62	3266.12			2.9241	246.804			4.34179	20.1035
2019-12-15_08:00:00	2019-12-15 18:00:01	0	1.99	1.8	0.12	0	0	299.9	2.26	2.59	26.75	3.4374	221.107	21.9	28.6	3.2	260.8	30.4	785																	404.01	6724			3.4225	178.757			0.0563575	3.37603
2019-12-15_09:00:00	2019-12-15 19:00:01	0	13.25	12.02	0.79	0	0	293.86	-0.92	2.01	20.71	2.21054	155.406	16.2	27.6	2.4	280.3	25.3	516																	17.4724	6003.15			47.4721	47.4721			0.035894	0.035894
2019-12-15_10:00:00	2019-12-15 20:00:01	0	16.25	14.76	0.95	0	0	292.02	-0.64	0.65	18.87	0.912195	135.444	12.7	25	1.1	305.5	22	740																	4.2436	6121.5			37.5769	37.5769			0.0352707	7.77186
2019-12-15_11:00:00	2019-12-15 21:00:01	0	13.46	12.22	0.78	0	0	291.02	0.88	1.02	17.87	1.34715	220.786	14.2	21	1.2	306.8	26.2	634																	3.9204	6285.32			9.7969	9.7969			0.0216517	5.07536
2019-12-15_12:00:00	2019-12-15 22:00:01	0	9.83	8.89	0.56	0	0	290.06	2.28	-0.04	16.91	2.28035	271.005	13.7	20	1	319.4	27.4	860																	23.1361	6907.27			9.5481	25.7049			1.6393	2.30933
2019-12-15_13:00:00	2019-12-15 23:00:01	0	5.3	4.77	0.3	0	0	289.88	2.67	-0.74	16.73	2.77065	285.491	20.4	18.1	1.1	309.7	31.3	1057																	244.297	6485.08			1.8769	51.1225			2.79107	2.79107
2019-12-15_14:00:00	2019-12-16 00:00:01	0	3.74	3.37	0.21	0	0	289.43	2.83	-1.09	16.28	3.03266	291.065	19.6	17.3	1.4	312.5	29.7	2099																	263.413	6844.25			1.0404	70.56			2.66556	2.66556
2019-12-15_15:00:00	2019-12-16 01:00:01	0	1.82	1.62	0.1	0	0	289.12	3.17	-1.33	15.97	3.4377	292.761	15.9	16.5	1.2	306.3	24.2	1663																	203.918	7775.71			0.2809	90.4401			5.00731	5.00731
2019-12-15_16:00:00	2019-12-16 02:00:01	0	1.32	1.16	0.07	0	0	289.21	3.59	-1.38	16.06	3.8461	291.027	16.6	16.5	1.1	308.1	24.3	1033																	238.394	7733.44			0.1936	88.7364			7.54108	7.54108
2019-12-15_17:00:00	2019-12-16 03:00:01	0	1.19	1.05	0.06	0	0	288.62	3.67	-1.17	15.47	3.85199	287.682	13.1	14.5	1.1	323.1	20.6	527																	145.202	8381.4			0.9409	144.24			7.57343	7.57343
2019-12-15_18:00:00	2019-12-16 04:00:01	0	0.98	0.85	0.05	0	0	287.66	3.53	-1.21	14.51	3.73162	288.921	15.2	14	1.3	314.2	24	417																	205.922	8037.12			0.2601	181.441			5.91278	5.91278
2019-12-15_19:00:00	2019-12-16 05:00:01	0	0.97	0.84	0.05	0	0	287.08	3.48	-1.35	13.93	3.73268	291.203	21.4	13.8	1.3	316.8	31.6	786																	422.714	6965.57			0.0169	203.062			5.91793	5.91793
2019-12-15_20:00:00	2019-12-16 06:00:01	0	0.88	0.75	0.05	0	0	292.08	3.34	0.36	18.93	3.35935	263.848	30.4	14.1	1	307.9	43	954																	879.122	5557.7			23.3289	80.1025			5.56651	5.56651
2019-12-15_21:00:00	2019-12-16 07:00:01	0	0.6	0.5	0.03	0	0	294.91	4.34	2.81	21.76	5.17027	237.078	28	20.4	1.6	280.5	43.9	864																	756.25	5959.84			1.8496	1.8496			12.7468	12.7468
2019-12-15_22:00:00	2019-12-16 08:00:01	0	0.2	0.17	0.01	0	0	296.85	5.92	4.23	23.7	7.27594	234.453	10.4	24.6	4	257.6	38.1	882																	104.653	9049.72			0.81	39.9424			10.7318	41.9378
2019-12-15_23:00:00	2019-12-16 09:00:01	0	0.13	0.1	0.01	0	0	297.88	5.82	4.69	24.73	7.47452	231.137	5.6	26.4	4.3	244.4	37.2	722																	30.25	10000			2.7889	83.7225			10.0776	48.644
2019-12-16_00:00:00	2019-12-16 10:00:01	0	0.11	0.09	0.01	0	0	298.79	5.46	4.67	25.64	7.18474	229.459	5.1	27.9	3.8	261.2	29.8	678																	25.1001	10102.3			5.1076	133.634			11.4565	38.251
2019-12-16_01:00:00	2019-12-16 11:00:01	0	0.11	0.09	0	0	0	299.64	4.75	4.8	26.49	6.75296	224.7	5.1	29.2	4	256.7	24.1	478																	25.1001	10102.3			7.3441	187.964			7.5788	35.4378
2019-12-16_02:00:00	2019-12-16 12:00:01	0	0.3	0.25	0.02	0	0	300.23	4.08	5.02	27.08	6.46891	219.102	7.6	30.1	3.7	245.7	24.4	580																	54.0225	9574.62			9.1204	231.04			7.66686	28.8252
2019-12-16_03:00:00	2019-12-16 13:00:01	0	0.24	0.2	0.01	0	0	300.82	3.66	4.97	27.67	6.17224	216.369	4.6	30.4	4.4	225.9	20.8	961																	19.36	10180.8			7.4529	258.888			3.14082	33.3187
2019-12-16_04:00:00	2019-12-16 14:00:01	0	0.71	0.63	0.04	0	0	301.46	3.27	4.63	28.31	5.66832	215.232	3	31	3.9	226.3	20.6	1450																	5.6169	10418.3			7.2361	300.329			3.12694	22.7368
2019-12-16_05:00:00	2019-12-16 15:00:01	0	1.9	1.7	0.11	0	0	301.97	2.84	4.6	28.82	5.40607	211.691	1	31.2	3.4	232	15.7	2132																	0.49	10609			5.6644	325.442			4.02432	16.0486
2019-12-16_06:00:00	2019-12-16 16:00:01	0	8.96	8.03	0.52	0	0	301.9	0.65	5.22	28.75	5.26031	187.098	3.8	31.5	3.7	207.9	18.3	1154																	17.8929	8811.58			7.5625	333.793			2.43458	17.3082
2019-12-16_07:00:00	2019-12-16 17:00:01	0	71.35	54.22	3.17	0.01	0	295.4	-7.6	3.24	22.25	8.26182	113.089	5.4	31	3.6	197.8	19.7	276																	2383.39	2383.39			76.5625	127.013			21.7325	49.8692
2019-12-16_08:00:00	2019-12-16 18:00:01	0	66.7	47.15	2.6	0.01	0	292.31	-6.06	3.08	19.16	6.79779	116.942	121.7	26	5	126.1	150.7	228																	5557.7	5557.7			46.7856	46.7856			3.23206	48.9691
2019-12-16_09:00:00	2019-12-16 19:00:01	0	74.53	53.67	2.98	0.01	0	289.45	-4.88	2.35	16.3	5.41635	115.713	374.5	22.3	3.8	118.4	428.4	183																	102932	103987			36	36			2.6126	19.5042
2019-12-16_10:00:00	2019-12-16 20:00:01	0	62.53	43.83	2.35	0	0	288.36	-5.37	2.27	15.21	5.83008	112.915	245.8	19.6	2.2	104.6	282.8	138																	40791.9	40791.9			19.2721	51.4089			13.1775	13.1775
2019-12-16_11:00:00	2019-12-16 21:00:01	0	42.4	26.33	1.24	0	0	287.55	-5.43	1.98	14.4	5.77973	110.034	69.7	17.4	1.7	98.9	89.7	135																	1880.96	1880.96			9	103.632			16.6442	16.6442
2019-12-16_12:00:00	2019-12-16 22:00:01	0	27.51	13.43	0.42	0	0	286.68	-5.31	2.05	13.53	5.69198	111.11	44.8	16.5	1.6	104.7	60.9																		984.077	2253.4			8.8209	142.802			16.7443	16.7443
2019-12-16_13:00:00	2019-12-16 23:00:01	0	24.15	11.72	0.34	0	0	285.99	-5.19	1.83	12.84	5.50318	109.423	63.5	15.8	1.2	97.3	79.3	184																	2681.17	2681.17			8.7616	177.956			18.5174	18.5174
2019-12-16_14:00:00	2019-12-17 00:00:01	0	19.98	9.82	0.27	0	0	285.05	-4.66	1.41	11.9	4.86864	106.834	70.6	15	1.6	106.5	86.5	218																	3694.21	3694.21			9.61	227.406			10.684	10.684
2019-12-16_15:00:00	2019-12-17 01:00:01	0	17.82	9.36	0.27	0	0	283.72	-3.32	0.62	10.57	3.3774	100.578	75.3	14.2	1.5	109.8	88.8	285																	4348.08	4348.08			13.1769	296.184			3.52461	3.52461
2019-12-16_16:00:00	2019-12-17 02:00:01	0	18.1	10.29	0.33	0	0	283.18	-3.16	0.6	10.03	3.21646	100.751	70.2	13.9	1.5	107.6	82.6	514																	3589.21	3589.21			14.9769	325.802			2.94623	2.94623
2019-12-16_17:00:00	2019-12-17 03:00:01	0	19.74	11.8	0.42	0	0	282.55	-2.64	0.09	9.4	2.64153	91.9524	80.4	13.1	2.3	119.8	92.7	12449																	4705.96	4705.96			13.69	379.47			0.116645	0.116645
2019-12-16_18:00:00	2019-12-17 04:00:01	0	21.33	13.21	0.49	0	0	281.92	-2.43	-0.38	8.77	2.45953	81.1123	79.1	12.5	0.9	111	90.2	9789																	4341.49	4341.49			13.9129	428.904			2.43214	2.43214
2019-12-16_19:00:00	2019-12-17 05:00:01	0	22.02	13.81	0.51	0	0	281.62	-2.57	-0.6	8.47	2.63911	76.8591	113.4	11.5	0.9	122.8	125.9	3764																	9918.17	9918.17			9.1809	484.44			3.0245	3.0245
2019-12-16_20:00:00	2019-12-17 06:00:01	0	21.89	13.6	0.5	0	0	284.21	-3.18	0.43	11.06	3.20894	97.7007	137.7	12	0.8	102.7	151.1	1078																	15400.8	15400.8			0.8836	357.966			5.80299	5.80299
2019-12-16_21:00:00	2019-12-17 07:00:01	0	20.01	12.23	0.44	0	0	286.65	-3.5	1.28	13.5	3.72671	110.088	103	13.6	1.6	108	115.2	1490																	8239.19	8239.19			0.01	221.414			4.52291	4.52291
2019-12-16_22:00:00	2019-12-17 08:00:01	0	19.14	12.05	0.46	0	0	289.1	-3.99	2.17	15.95	4.54192	118.54	110.1	15.4	2.9	123.7	122.3	1841																	9613.8	9613.8			0.3025	112.997			2.69589	6.97972
2019-12-16_23:00:00	2019-12-17 09:00:01	0	18.99	12.24	0.5	0	0	291.23	-4.28	2.28	18.08	4.84941	118.045	108.9	18	3.4	121.8	120.7	2002																	9343.16	9343.16			0.0064	34.81			2.1008	11.8984
2019-12-17_00:00:00	2019-12-17 10:00:01	0	15.64	9.98	0.4	0	0	293.25	-4.18	2.4	20.1	4.82	119.863	84.6	20.4	3.6	122.4	94.1	1978																	5568.14	5568.14			0.09	2.1904			1.4884	13.1044
2019-12-17_01:00:00	2019-12-17 11:00:01	0	14.98	9.7	0.41	0	0	294.78	-4.01	2.61	21.63	4.78458	123.059	68.7	22.8	3.4	121.8	77.6	2044																	3481	3481			1.3689	6.0025			1.91706	11.4554
2019-12-17_02:00:00	2019-12-17 12:00:01	0	23.95	17.41	0.9	0	0	295.95	-3.98	2.88	22.8	4.91272	125.89	111.8	24.4	3.9	126	121	1861																	8909.47	8909.47			2.56	27.2484			1.0256	16.1019
2019-12-17_03:00:00	2019-12-17 13:00:01	0	33.96	26.17	1.46	0	0	296.53	-4.23	3.41	23.38	5.43332	128.874	234.1	25.7	3.4	128.3	246.1	2524																	43234.9	43234.9			5.3824	50.41			4.1344	16.2677
2019-12-17_04:00:00	2019-12-17 14:00:01	0	45.19	35.8	2.06	0	0	296.65	-4.56	3.24	23.5	5.59385	125.395	207	26.6	3	130.6	220.2	3415																	29309.4	29309.4			9.61	65.9344			6.72808	14.3933
2019-12-17_05:00:00	2019-12-17 15:00:01	0	55.75	44.33	2.57	0.01	0	296.61	-4.78	3.27	23.46	5.79149	124.376	94.5	27	3.5	121.2	106.3	3205																	2517.03	2517.03			12.5316	71.9104			5.2509	20.1734
2019-12-17_06:00:00	2019-12-17 16:00:01	0	72.52	56.63	3.26	0.01	0	295.85	-5.26	3.38	22.7	6.25236	122.724	120.7	26.8	3.6	123.2	134.5	2261																	4104.96	5130.86			16.81	56.5504			7.03501	25.5263
2019-12-17_07:00:00	2019-12-17 17:00:01	0	70.48	52.05	2.84	0.01	0	294.34	-5.59	3.04	21.19	6.36315	118.538	129.8	26.2	3.2	120.5	144	2280																	6045.06	6045.06			25.1001	29.2681			10.0055	22.6876
2019-12-17_08:00:00	2019-12-17 18:00:01	0	65.24	46.53	2.45	0.01	0	291.95	-5.69	2.9	18.8	6.3864	117.006	177.9	24.8	3.7	123.5	194.9	1560																	17258.1	17258.1			36	36			7.21674	27.946
2019-12-17_09:00:00	2019-12-17 19:00:01	0	58.95	41.19	2.1	0	0	288.97	-4.41	2.07	15.82	4.87165	115.145	189.6	22.2	3.2	118	209.7	955																	22025.5	22025.5			40.7044	40.7044			2.79442	10.7037
2019-12-17_10:00:00	2019-12-17 20:00:01	0	46.45	30.45	1.42	0	0	287.28	-3.98	1.01	14.13	4.10615	104.239	62.6	19.6	1.9	111.6	80.1	1293																	1033.62	1033.62			29.9209	68.0625			4.86712	4.86712
2019-12-17_11:00:00	2019-12-17 21:00:01	0	37.05	22.04	0.88	0	0	286.19	-3.24	0.16	13.04	3.24395	92.827	39.8	17.9	1.7	114.3	53.8	2993																	315.418	1923.7			23.6196	121.882			2.38378	2.38378
2019-12-17_12:00:00	2019-12-17 22:00:01	0	27.53	14.35	0.41	0	0	285.37	-2.86	-0.48	12.22	2.9	80.4729	55.8	16.4	2.2	117.1	69	5766																	1718.1	1718.1			17.4724	178.49			0.49	0.49
2019-12-17_13:00:00	2019-12-17 23:00:01	0	21.34	10.28	0.2	0	0	284.55	-2.64	-0.83	11.4	2.7674	72.5473	66.6	14.9	1.9	120.3	79.6	2177																	3171.94	3171.94			12.25	245.862			0.752382	0.752382
2019-12-17_14:00:00	2019-12-18 00:00:01	0	18.08	8.57	0.14	0	0	284.09	-2.78	-1.29	10.94	3.06472	65.1075	73.6	14	2.3	115.4	86.6	2375																	4228.9	4228.9			9.3636	290.362			0.584795	0.584795
2019-12-17_15:00:00	2019-12-18 01:00:01	0	15.9	7.55	0.12	0	0	283.74	-3	-1.63	10.59	3.41422	61.4834	69.7	13.6	2.3	113.2	81.4	2770																	3862.62	3862.62			9.0601	316.484			1.24149	1.24149
2019-12-17_16:00:00	2019-12-18 02:00:01	0	14.37	6.91	0.11	0	0	283.39	-3.28	-1.43	10.24	3.57817	66.4441	82.9	13.7	1.1	94.2	94	3812																	5774.48	5774.48			11.9716	325.442			6.14133	6.14133
2019-12-17_17:00:00	2019-12-18 03:00:01	0	13.7	6.78	0.12	0	0	282.95	-3.34	-1.61	9.8	3.70779	64.2644	115.8	14.1	1.3	86	128.7	5517																	11885.4	11885.4			18.49	326.886			5.79745	5.79745
2019-12-17_18:00:00	2019-12-18 04:00:01	0	11.64	5.7	0.08	0	0	282.54	-3.11	-2.08	9.39	3.74146	56.2251	113.4	13.8	1.4	100.6	125.3	3035																	11599.3	11599.3			19.4481	353.064			5.48242	5.48242
2019-12-17_19:00:00	2019-12-18 05:00:02	0	9.32	4.51	0.05	0	0	282.35	-2.96	-2.54	9.2	3.90041	49.367	115.5	13.2	1.7	110.6	127.4	711																	12318.8	12318.8			16	383.376			4.84181	4.84181
2019-12-17_20:00:00	2019-12-18 06:00:02	0	7.87	3.84	0.04	0	0	286.15	-3.3	-1.66	13	3.694	63.2963	126.3	12.9	2.1	121.5	138.9	1062																	14996.5	14996.5			0.01	258.566			2.54082	2.54082
2019-12-17_21:00:00	2019-12-18 07:00:02	0	6.28	3.03	0.02	0	0	289.53	-4.25	-0.86	16.38	4.33614	78.5606	131	13.9	2.7	123.7	144.4	1470																	16376.3	16376.3			6.1504	136.89			2.67695	5.00032
2019-12-17_22:00:00	2019-12-18 08:00:02	0	4.95	2.39	0.02	0	0	292.12	-4.72	0.27	18.97	4.72772	93.2738	115.2	16.6	3.1	123.2	126.2	1794																	12726.1	12726.1			5.6169	41.0881			2.64946	9.16707
2019-12-17_23:00:00	2019-12-18 09:00:02	0	5.65	2.99	0.06	0	0	293.99	-4.73	1.12	20.84	4.86079	103.321	77.1	19.5	3.1	125.1	85.2	1748																	5492.29	5492.29			1.7956	2.6896			3.10039	9.99061
2019-12-18_00:00:00	2019-12-18 10:00:02	0	6.88	3.91	0.11	0	0	295.59	-4.59	1.66	22.44	4.88095	109.883	51.1	22.3	3.2	128.4	57.8	1880																	2226.9	2569.48			0.0196	7.6176			2.8256	10.7647
2019-12-18_01:00:00	2019-12-18 11:00:02	0	7.01	4.03	0.12	0	0	296.98	-4.19	2.09	23.83	4.68233	116.51	31.1	24.8	2.9	134.7	37.3	2414																	732.785	4980.12			0.9409	44.2225			3.17669	7.74135
2019-12-18_02:00:00	2019-12-18 12:00:02	0	9.86	6.62	0.3	0	0	298.15	-3.99	2.52	25	4.71916	122.276	23.3	27	2.7	137.5	28.6	2605																	278.222	5742.61			4	100.4			4.07702	6.86002
2019-12-18_03:00:00	2019-12-18 13:00:02	0	17.72	13.64	0.75	0	0	298.86	-4.16	2.99	25.71	5.12306	125.707	16.2	28.3	2.8	146.5	21.6	2456																	6.5536	5754.74			6.7081	144.721			5.39659	9.75348
2019-12-18_04:00:00	2019-12-18 14:00:02	0	28.79	23.76	1.42	0	0	299.32	-4.22	2.99	26.17	5.1719	125.319	30.8	29.2	2.9	126.5	36.4	3025																	49.5616	2615.3			9.1809	179.292			5.16151	10.7053
2019-12-18_05:00:00	2019-12-18 15:00:02	0	45.83	38.98	2.39	0.01	0	299.37	-4.54	3.04	26.22	5.46381	123.806	90.8	29.1	3.6	138.9	98.8	3049																	2685.31	2685.31			8.2944	177.956			3.47378	18.1801
2019-12-18_06:00:00	2019-12-18 16:00:02	0	64.15	54.99	3.4	0.01	0	298.8	-4.66	2.96	25.65	5.52062	122.423	167.6	29.1	3.3	122.3	178.2	2722																	12681	13663.3			11.9025	163.073			4.93114	16.1654
2019-12-18_07:00:00	2019-12-18 17:00:02	0	67.33	56.93	3.46	0.01	0	297.74	-4.39	2.56	24.59	5.0819	120.248	389	28	3.7	122.6	410.5	1772																	110270	115756			11.6281	112.572			1.90965	15.8555
2019-12-18_08:00:00	2019-12-18 18:00:02	0	68.19	56.7	3.39	0.01	0	296.01	-3.86	1.32	22.86	4.07946	108.879	444.8	27.2	2.9	120.7	478.1	1114																	150622	156658			18.8356	65.2864			1.39113	4.75005
2019-12-18_09:00:00	2019-12-18 19:00:02	0	73.01	60.06	3.55	0.01	0	291.97	-2.45	0.12	18.82	2.45294	92.8039	201.9	25.3	1.9	119.4	224.9	669																	20118.6	24417.2			41.9904	41.9904			0.305739	0.305739
2019-12-18_10:00:00	2019-12-18 20:00:02	0	41.1	30.42	1.6	0	0	289.74	-1.89	-1.52	16.59	2.42539	51.1927	141.8	22.7	1.2	119.5	157	446																	12405.5	12405.5			37.3321	37.3321			1.50157	1.50157
2019-12-18_11:00:00	2019-12-18 21:00:02	0	17.77	8.97	0.21	0	0	288.39	-1.86	-3.14	15.24	3.64955	30.6408	191.5	21	0.7	106.3	207.5	308																	33317.2	33317.2			33.1776	33.1776			8.69983	8.69983
2019-12-18_12:00:00	2019-12-18 22:00:02	0	15.75	8.17	0.19	0	0	287.85	-1.73	-4.2	14.7	4.54235	22.3871	228	19.6	0.8	108.3	245.4	368																	48325.2	48325.2			24.01	58.9824			14.0051	14.0051
2019-12-18_13:00:00	2019-12-18 23:00:02	0.01	16.22	10.14	0.37	0	0	287.78	-1.34	-4.13	14.63	4.34195	17.976	220.4	18.1	0.6	108.5	237.3	1097																	44209.3	44209.3			12.0409	85.5625			14.0022	14.0022
2019-12-18_14:00:00	2019-12-19 00:00:02	0.03	15.45	10.34	0.42	0	0	288.03	-1.54	-3.39	14.88	3.7234	24.4313	194	16.6	0.4	94.5	210.4	2459																	33731	33731			2.9584	110.25			11.045	11.045
2019-12-18_15:00:00	2019-12-19 01:00:02	0.06	13.48	9.39	0.4	0	0	287.66	-1.45	-3.25	14.51	3.55879	24.0443	164.3	15	0.3	358.3	178.4	5838																	23997.1	23997.1			0.2401	155.501			10.6197	10.6197
2019-12-18_16:00:00	2019-12-19 02:00:02	0.11	10.7	7.62	0.33	0	0	287.69	-1.26	-3.35	14.54	3.57912	20.6123	102.1	13.7	1	316.6	115.4	10004																	8926.47	8926.47			0.7056	188.788			6.65186	6.65186
2019-12-18_17:00:00	2019-12-19 03:00:02	0.15	8.37	5.94	0.26	0	0	287.66	-0.9	-3.44	14.51	3.55578	14.6616	66.1	12.9	1.3	315.8	79.6	5345																	3619.23	3619.23			2.5921	212.285			5.08856	5.08856
2019-12-18_18:00:00	2019-12-19 04:00:02	0.21	6.57	4.45	0.19	0	0	287.43	0.29	-3.38	14.28	3.39242	355.096	55	12.2	0.9	319	65.4	2971																	2555.3	2555.3			4.3264	240.25			6.21215	6.21215
2019-12-18_19:00:00	2019-12-19 05:00:02	0.25	6.36	4.28	0.18	0	0	287.22	2.25	-2.33	14.07	3.23904	316.001	49.5	11.8	0.8	326.5	59	3800																	2044.85	2695.69			5.1529	259.532			5.94893	5.94893
2019-12-18_20:00:00	2019-12-19 06:00:02	0.2	10.68	7.95	0.36	0	0	292.09	2.45	-1.08	18.94	2.67748	293.789	50	11.6	1.1	314.8	60.3	5302																	1768.2	2280.06			53.8756	130.874			2.48844	2.48844
2019-12-18_21:00:00	2019-12-19 07:00:02	0.13	23.99	19.56	0.95	0	0	295.55	2.81	0.82	22.4	2.9272	253.732	48	15	1.2	305.5	62.2	5336																	808.834	1454.66			54.76	54.76			2.98322	2.98322
2019-12-18_22:00:00	2019-12-19 08:00:02	0.05	41.65	35.13	1.73	0	0	297.17	2.64	2.41	24.02	3.57459	227.608	54.3	21.3	1.4	302.4	71.6	4955																	367.489	367.489			7.3984	11.1556			4.72885	4.72885
2019-12-18_23:00:00	2019-12-19 09:00:02	0.14	31.16	25.9	1.25	0	0	299.01	1.99	2.51	25.86	3.20315	218.408	77	25.3	2.1	264.7	93.5	4159																	2611.21	2611.21			0.3136	84.2724			1.21695	1.21695
2019-12-19_00:00:00	2019-12-19 10:00:02	0.26	20.63	16.65	0.78	0	0	300.52	1.27	2.44	27.37	2.75073	207.497	104.3	26.9	2.1	240.1	119.5	3593																	7682.52	7682.52			0.2209	151.044			0.423446	0.423446
2019-12-19_01:00:00	2019-12-19 11:00:02	0.31	16.83	13.43	0.62	0	0	301.68	0.57	2.42	28.53	2.48622	193.254	106.8	28.8	2.3	218.8	123.1	2080																	8717.96	8717.96			0.0729	235.623			0.0346786	0.0346786
2019-12-19_02:00:00	2019-12-19 12:00:02	0.34	18.14	14.79	0.69	0	0	302.65	-0.11	2.59	29.5	2.59233	177.568	124.6	30.6	2	238.8	141.8	1621																	12058.2	12058.2			1.21	328.334			0.350861	0.350861
2019-12-19_03:00:00	2019-12-19 13:00:02	0.35	21.34	17.87	0.85	0	0	303.46	-1.08	2.61	30.31	2.82462	157.52	102.5	32	1.1	275.3	117.7	1345																	7162.24	7162.24			2.8561	413.309			2.97433	2.97433
2019-12-19_04:00:00	2019-12-19 14:00:02	0.35	26.7	22.86	1.16	0	0	304.07	-1.88	2.55	30.92	3.16811	143.6	78.8	33.1	1.8	249	92.9	1400																	3129.28	3129.28			4.7524	485.762			1.87172	1.87172
2019-12-19_05:00:00	2019-12-19 15:00:02	0.35	35.99	31.37	1.71	0	0	304.34	-2.52	2.17	31.19	3.32555	130.732	84.9	33.3	1.6	225.9	98	1627																	2865.46	2865.46			4.4521	506.7			2.97753	2.97753
2019-12-19_06:00:00	2019-12-19 16:00:02	0.35	48.95	43.22	2.48	0.01	0	304.22	-2.87	1.84	31.07	3.40918	122.664	91.6	33.2	2.4	218.9	105.1	1846																	2340.62	2340.62			4.5369	496.844			1.01844	1.01844
2019-12-19_07:00:00	2019-12-19 17:00:02	0.35	100.41	90.2	5.6	0.01	0.01	303.19	-4.46	0.83	30.04	4.53657	100.542	99.9	33.2	2.4	212	118.1	1773																	94.09	7123.36			9.9856	451.988			4.56495	4.56495
2019-12-19_08:00:00	2019-12-19 18:00:02	0.22	12.09	9.04	0.42	0	0	299.81	-1.74	-2.7	26.66	3.2121	32.7996	94.4	32.3	3.4	193.6	111.8	3193																	7286.33	7286.33			31.8096	288.32			0.0353056	3.28371
2019-12-19_09:00:00	2019-12-19 19:00:02	0.23	19.91	16.06	0.9	0	0	296.96	-1.75	-3.82	23.81	4.20177	24.6133	84.6	30.5	1.9	196	100.8	2947																	4697.73	4697.73			44.7561	152.029			5.29816	5.29816
2019-12-19_10:00:00	2019-12-19 20:00:02	0.24	22.5	18.5	1.01	0	0	295.92	-1.42	-4.5	22.77	4.71873	17.5135	92.1	28.9	1.5	150.7	111.2	3186																	5416.96	5416.96			37.5769	93.8961			10.3602	10.3602
2019-12-19_11:00:00	2019-12-19 21:00:02	0.25	22.02	18.2	0.95	0	0	294.89	-0.58	-4.15	21.74	4.19033	7.95615	98.3	26.7	0.3	108.6	119.8	3055																	6416.01	6416.01			24.6016	41.7316			15.1347	15.1347
2019-12-19_12:00:00	2019-12-19 22:00:02	0.27	28.87	24.64	1.3	0	0	294.03	0.21	-3.77	20.88	3.77584	356.812	125.5	23.3	0.7	327.4	145.8	2235																	10172.7	10172.7			5.8564	5.8564			9.46082	9.46082
2019-12-19_13:00:00	2019-12-19 23:00:02	0.28	34.03	29.45	1.56	0	0	293.93	1.3	-3.43	20.78	3.66809	339.243	128.3	21.1	0.8	317.9	151.4	2482																	9771.32	9771.32			0.1024	0.1024			8.22595	8.22595
2019-12-19_14:00:00	2019-12-20 00:00:02	0.26	34.53	29.81	1.57	0	0	294.25	2.41	-3.42	21.1	4.18384	324.829	114.9	19.6	0.5	339.2	138.6	2904																	7240.31	7240.31			2.25	2.25			13.5707	13.5707
2019-12-19_15:00:00	2019-12-20 01:00:02	0.25	65	57.7	3.26	0.01	0	294.38	3.09	-3.34	21.23	4.55013	317.227	128	18.5	1	315.1	150.8	3380																	4942.09	6400			7.4529	7.4529			12.6034	12.6034
2019-12-19_16:00:00	2019-12-20 02:00:02	0.25	75.45	67.3	3.79	0.01	0	294.07	3.04	-3.61	20.92	4.7195	319.899	122.9	17.5	1	322	145.8	3889																	3091.36	7140.25			11.6964	12.6736			13.8347	13.8347
2019-12-19_17:00:00	2019-12-20 03:00:02	0.23	57.09	50.2	2.72	0.01	0	293.31	2.73	-3.62	20.16	4.53402	322.979	126.2	16.6	0.7	314	146.3	3171																	5776	5776			12.6736	27.2484			14.6997	14.6997
2019-12-19_18:00:00	2019-12-20 04:00:02	0.2	47.17	40.81	2.11	0	0	292.76	2.76	-3.33	19.61	4.3251	320.347	133.4	16.1	0.7	326.3	150.3	3371																	8572.91	8572.91			12.3201	39.3129			13.1414	13.1414
2019-12-19_19:00:00	2019-12-20 05:00:02	0.19	43.61	37.38	1.87	0	0	292.47	3.07	-2.93	19.32	4.2438	313.663	142.7	15.1	0.1	11.3	156.2	3290																	11092.3	11092.3			17.8084	57.1536			17.171	17.171
2019-12-19_20:00:00	2019-12-20 06:00:02	0.19	41.38	35.19	1.71	0	0	295.68	3.32	-1.84	22.53	3.79579	298.996	143	15.1	0.9	318.7	156.3	3677																	11623	11623			55.2049	55.2049			8.38558	8.38558
2019-12-19_21:00:00	2019-12-20 07:00:02	0.19	39.6	33.42	1.6	0	0	298.98	4.68	-0.57	25.83	4.71458	276.944	141.8	16.7	0.9	310	158.2	4828																	11746.2	11746.2			83.3569	83.3569			14.551	14.551
2019-12-19_22:00:00	2019-12-20 08:00:02	0.2	34.85	28.86	1.33	0	0	300.56	5.22	1.06	27.41	5.32654	258.521	154.5	20.3	0.3	288.9	171.8	3754																	15785.4	15785.4			50.5521	50.5521			25.2661	25.2661
2019-12-19_23:00:00	2019-12-20 09:00:02	0.2	29.98	24.22	1.07	0	0	301.64	5.34	2.3	28.49	5.81426	246.698	160.6	24.9	1.2	118.9	184.8	4099																	18599.5	18599.5			12.8881	130.188			21.2914	21.2914
2019-12-20_00:00:00	2019-12-20 10:00:02	0.21	26.47	20.83	0.89	0	0	302.65	4.79	2.67	29.5	5.48389	240.864	175.4	29.1	0.7	148.4	201.1	4082																	23891.9	23891.9			0.16	276.224			22.8856	22.8856
2019-12-20_01:00:00	2019-12-20 11:00:02	0.29	21.46	15.94	0.63	0	0	304.09	3.97	2.83	30.94	4.87543	234.517	169.8	31.5	0.7	176.4	188.5	3859																	23672.9	23672.9			0.3136	418.612			17.4342	17.4342
2019-12-20_02:00:00	2019-12-20 12:00:02	0.42	18.31	12.36	0.44	0	0	305.24	3.5	3.28	32.09	4.79671	226.858	136.2	32.7	1	234.5	156.5	4020																	15336.3	15336.3			0.3721	520.296			14.415	14.415
2019-12-20_03:00:00	2019-12-20 13:00:02	0.78	19.52	11.86	0.41	0	0	306.19	3.13	3.99	33.04	5.07119	218.113	116.8	34	2.1	190.2	136.6	4204																	11012.4	11012.4			0.9216	628.004			8.82799	8.82799
2019-12-20_04:00:00	2019-12-20 14:00:02	1.18	21.22	11.65	0.39	0	0	306.8	2.81	5.18	33.65	5.89309	208.478	97.6	34.9	2.4	215.4	120.6	4377																	7387.4	7387.4			1.5625	705.965			12.2017	12.2017
2019-12-20_05:00:00	2019-12-20 15:00:02	1.22	21.62	12.05	0.43	0	0	306.85	2.48	5.68	33.7	6.19781	203.587	148.3	32.8	4.5	137	175.5	4603																	18564.1	18564.1			0.81	601.23			2.88255	34.7841
2019-12-20_06:00:00	2019-12-20 16:00:02	1.17	22.48	13.56	0.54	0	0	306.5	0.55	5.19	33.35	5.21906	186.049	468.2	30.6	4.7	122.9	507.8	5448																	206698	206698			7.5625	482.681			0.269425	26.2048
2019-12-20_07:00:00	2019-12-20 17:00:02	0.78	63.84	52.07	2.95	0.01	0	303.82	-3.34	1.93	30.67	3.85753	120.021	456.2	28.9	3.4	118.6	493.4	6897																	163321	163321			3.1329	309.408			0.209329	6.03943
2019-12-20_08:00:00	2019-12-20 18:00:02	0.7	64.34	52.88	2.91	0.01	0	302.66	-1.67	-2.17	29.51	2.73821	37.5815	308.3	27.8	2	108.8	338.6	6353																	65239.4	65270			2.9241	235.009			0.544956	0.544956
2019-12-20_09:00:00	2019-12-20 19:00:02	0.52	47.55	38.77	1.85	0	0	298.23	0.02	-2.84	25.08	2.84007	359.597	170.7	26.2	1.8	116.3	194.6	5813																	17405.5	17405.5			1.2544	86.49			1.08175	1.08175
2019-12-20_10:00:00	2019-12-20 20:00:02	0.28	55.23	46.57	2.21	0	0	296.11	-0.17	-2.85	22.96	2.85507	3.41368	108.8	24.2	1.6	118.3	132.5	4653																	3872.57	3872.57			1.5376	26.8324			1.57519	1.57519
2019-12-20_11:00:00	2019-12-20 21:00:02	0.25	95.07	82.74	4.44	0.01	0.01	294.32	-0.14	-1.78	21.17	1.7855	4.49723	91	22.7	1.6	117.1	113.3	4127																	68.2276	4629.44			2.3409	3.5721			0.0344092	2.00082
2019-12-20_12:00:00	2019-12-20 22:00:02	0.35	109.48	96.51	5.36	0.01	0.01	294.13	0.63	-3.07	20.98	3.13398	348.403	77.1	21.5	1.8	126.8	98.2	3459																	376.748	4611.77			0.2704	0.2704			1.77949	1.77949
2019-12-20_13:00:00	2019-12-20 23:00:02	0.29	81.11	71.48	3.95	0.01	0.01	295.09	1.47	-3.47	21.94	3.76853	337.041	80.9	20.4	1.3	115.8	101.8	3392																	88.7364	2179.02			2.3716	2.3716			6.09363	6.09363
2019-12-20_14:00:00	2019-12-21 00:00:02	0.23	44.67	38.12	2	0	0	293.45	0.61	-3.15	20.3	3.20852	349.04	80	19	1	114.8	101.2	9046																	1753.93	1753.93			1.69	7.1824			4.87756	4.87756
2019-12-20_15:00:00	2019-12-21 01:00:02	0.26	36.68	30.66	1.51	0	0	293.04	1.05	-2.91	19.89	3.09364	340.159	82.7	18.2	0.4	83.1	103.8	14161																	2708.16	2708.16			2.8561	15.1321			7.25569	7.25569
2019-12-20_16:00:00	2019-12-21 02:00:02	0.27	32.72	26.91	1.25	0	0	293.8	2	-3.45	20.65	3.98779	329.899	81.7	16.6	0.5	330.1	102.1	9619																	3001.94	3001.94			16.4025	22.3729			12.1647	12.1647
2019-12-20_17:00:00	2019-12-21 03:00:02	0.27	25.21	19.74	0.87	0	0	295.63	3.49	-4.79	22.48	5.92657	323.923	82.4	15.2	1	311.5	102.5	5700																	3926.28	3926.28			52.9984	52.9984			24.2711	24.2711
2019-12-20_18:00:00	2019-12-21 04:00:02	0.26	22.58	17.4	0.73	0	0	296.09	4.61	-5.35	22.94	7.0622	319.249	94.9	14.9	0.5	326.7	116	2971																	6006.25	6006.25			64.6416	64.6416			43.0624	43.0624
2019-12-20_19:00:00	2019-12-21 05:00:02	0.26	19.08	14.36	0.58	0	0	295.5	5.22	-5.56	22.35	7.6264	316.807	104.5	14.2	0.7	318.5	125.8	2481																	8125.22	8125.22			66.4225	66.4225			47.975	47.975
2019-12-20_20:00:00	2019-12-21 06:00:02	0.26	22	16.84	0.72	0	0	297.35	6.69	-4.95	24.2	8.32218	306.498	105.4	14.1	0.4	316.7	126.4	2109																	7842.87	7842.87			102.01	102.01			62.7609	62.7609
2019-12-20_21:00:00	2019-12-21 07:00:02	0.25	21.51	16.21	0.68	0	0	299.51	7.76	-4.14	26.36	8.79529	298.08	111.1	17.1	0.4	135.6	132.1	2150																	9004.11	9004.11			85.7476	85.7476			70.481	70.481
2019-12-20_22:00:00	2019-12-21 08:00:02	0.23	21.94	16.4	0.64	0	0	301.43	8.71	-3.19	28.28	9.27579	290.115	115.8	23.7	1.6	288.6	137.4	2270																	9880.36	9880.36			20.9764	100			58.9177	58.9177
2019-12-20_23:00:00	2019-12-21 09:00:02	0.22	26.18	20.32	0.78	0	0	303.12	9.04	-1.67	29.97	9.19296	280.467	94.4	28.3	3.8	288.3	113.8	2222																	5487.85	5487.85			2.7889	265.364			29.084	67.1246
2019-12-21_00:00:00	2019-12-21 10:00:02	0.28	28.51	22.63	0.89	0	0	303.98	9.38	-0.43	30.83	9.38985	272.625	68.4	29.9	3.6	281.5	87.4	2601																	2094.89	2094.89			0.8649	351.563			33.5224	67.0737
2019-12-21_01:00:00	2019-12-21 11:00:02	0.43	24.19	18	0.68	0	0	305.25	8.41	-0.12	32.1	8.41086	270.817	75.6	31.7	3.5	262.6	97.6	2446																	3317.76	3317.76			0.16	476.112			24.1165	50.5643
2019-12-21_02:00:00	2019-12-21 12:00:02	1.51	27.54	16.44	0.54	0	0	306.42	7.87	1.67	33.27	8.04523	258.02	81	33.4	3.5	263.7	104.8	2884																	4167.99	4167.99			0.0169	609.596			20.6592	45.4982
2019-12-21_03:00:00	2019-12-21 13:00:02	3.07	35.5	17.74	0.51	0	0	307.5	6.95	2.05	34.35	7.24603	253.566	72.6	34.9	3.2	223.7	95.3	2753																	3009.62	3009.62			0.3025	743.653			16.3704	31.8777
2019-12-21_04:00:00	2019-12-21 14:00:02	5.85	46.17	16.25	0.28	0	0	308.44	5.91	4.66	35.29	7.5262	231.744	54.3	35.7	3.5	188.2	75.9	2850																	1447.8	1447.8			0.1681	841.58			16.2103	38.7656
2019-12-21_05:00:00	2019-12-21 15:00:02	5.92	46.15	16.48	0.29	0	0	308.49	6.05	2.73	35.34	6.63742	245.713	46.4	36.1	2.8	213.3	66.1	3033																	895.206	1833.55			0.5776	867.892			14.7258	21.5057
2019-12-21_06:00:00	2019-12-21 16:00:02	5.94	48.08	17.72	0.35	0	0	308.39	6.29	2.14	35.24	6.64407	251.211	54.2	35.7	3.9	185.4	75.4	3565																	1330.79	1330.79			0.2116	838.682			7.52993	32.9944
2019-12-21_07:00:00	2019-12-21 17:00:02	6.56	52.72	18.88	0.37	0	0	308.02	5.85	0.71	34.87	5.89293	263.08	85.7	34.9	3.8	186.1	109.5	3695																	4464.91	4464.91			0.0009	772.284			4.38035	23.9407
2019-12-21_08:00:00	2019-12-21 18:00:02	10.5	70.77	19.33	0.16	0	0	304.46	4.94	5.45	31.31	7.35568	222.19	91.7	34.2	3	199.7	116.2	2218																	5237.42	5237.42			8.3521	553.661			18.972	30.8656
2019-12-21_09:00:00	2019-12-21 19:00:02	11.28	76.89	21.7	0.24	0	0	301.8	1.86	2.62	28.65	3.2131	215.372	87	32.6	1	168.9	111.2	2281																	4264.09	4264.09			15.6025	371.333			4.8978	4.8978
2019-12-21_10:00:00	2019-12-21 20:00:02	9.22	134.25	81.84	4.33	0.01	0.01	300.17	-4.19	3.39	27.02	5.38964	128.975	137	29.3	0.3	84.7	160.3	2489																	3042.63	12800.7			5.1984	205.636			25.9044	25.9044
2019-12-21_11:00:00	2019-12-21 21:00:02	11.11	85.81	30.27	0.79	0	0	298.11	-1	1.23	24.96	1.58521	140.888	158.5	26.2	0.6	329.8	183	2436																	16442.9	16442.9			1.5376	84.2724			0.970644	6.83711
2019-12-21_12:00:00	2019-12-21 22:00:02	10.74	93.32	38.54	1.33	0	0	298.79	0.78	-1.26	25.64	1.48189	328.241	142.5	24.3	0.8	316	171	2043																	10807.7	10807.7			1.7956	63.3616			0.464975	6.34087
2019-12-21_13:00:00	2019-12-21 23:00:02	10.52	100.39	45.84	1.79	0	0	297.2	2.02	-2.14	24.05	2.94279	316.652	129.6	22.4	0.9	319.8	159	1839																	7015.74	7015.74			2.7225	19.9809			4.17298	4.17298
2019-12-21_14:00:00	2019-12-22 00:00:02	10.56	109.85	53.67	2.24	0	0	296.84	2.48	-1.72	23.69	3.01808	304.743	111.5	21.4	0.7	311.6	138.2	1792																	3344.31	3536.68			5.2441	9.6721			5.37349	5.37349
2019-12-21_15:00:00	2019-12-22 01:00:02	11.51	120.2	57.84	2.38	0.01	0	296.6	2.77	-1.61	23.45	3.2039	300.166	116.8	20.5	0.8	330.7	141.5	2206																	3476.28	4752.72			8.7025	8.7025			5.77875	5.77875
2019-12-21_16:00:00	2019-12-22 02:00:02	13.17	124.29	54.05	1.99	0	0	296.18	2.65	-1.25	23.03	2.93002	295.253	123	19.3	0.3	321.7	145.3	2773																	4754.1	5090.82			13.9129	13.9129			6.91699	6.91699
2019-12-21_17:00:00	2019-12-22 03:00:02	14.32	125.15	50.11	1.64	0	0	295.94	2.17	-1.11	22.79	2.43742	297.091	120.3	19.3	1.1	327.3	141.9	2481																	4926.64	4926.64			12.1801	12.1801			1.78868	1.78868
2019-12-21_18:00:00	2019-12-22 04:00:02	14.81	126.19	49.2	1.53	0	0	295.43	2.59	-0.83	22.28	2.71974	287.769	110.7	19	0.7	111.8	130	3362																	3782.25	3782.25			10.7584	10.7584			4.07936	4.07936
2019-12-21_19:00:00	2019-12-22 05:00:02	0	6.86	6.28	0.36	0	0	291.77	3.77	-4.05	18.62	5.53312	317.051	114	18.8	0.3	76.4	132	5086																	11603.6	11603.6			0.0324	20.7936			27.3855	27.3855
2019-12-21_20:00:00	2019-12-22 06:00:02	0	4.58	4.18	0.24	0	0	294.42	4.3	-3.65	21.27	5.64026	310.326	117.9	17.8	0.3	340.5	137.4	5422																	12932.2	12932.2			12.0409	12.0409			28.5183	28.5183
2019-12-21_21:00:00	2019-12-22 07:00:02	0	3.75	3.41	0.19	0	0	296.86	5.34	-3.19	23.71	6.22027	300.853	118.3	20.5	1	126.9	141.8	4501																	13199.7	13199.7			10.3041	10.3041			27.2512	27.2512
2019-12-21_22:00:00	2019-12-22 08:00:02	0	2.38	2.16	0.12	0	0	298.94	5.85	-1.99	25.79	6.17921	288.787	135	23.5	2.6	124.6	163.5	3213																	17646.5	17646.5			5.2441	53.4361			12.8107	15.8341
2019-12-21_23:00:00	2019-12-22 09:00:02	0	1.73	1.56	0.09	0	0	300.29	5.87	-0.13	27.14	5.87144	271.269	158	25.9	2.8	120.5	183.1	3180																	24473.5	24473.5			1.5376	122.324			9.43374	14.988
2019-12-22_00:00:00	2019-12-22 10:00:02	0	1.24	1.12	0.06	0	0	301.36	5.33	1.43	28.21	5.5185	254.982	203.1	26.5	3.9	126.7	228.3	3299																	40795.9	40795.9			2.9241	162.053			2.61953	21.3305
2019-12-22_01:00:00	2019-12-22 11:00:02	0	1.07	0.96	0.05	0	0	302.21	4.85	2.26	29.06	5.35071	245.015	270.7	26.8	4	126.7	295.8	3196																	72759.7	72759.7			5.1076	192.654			1.82442	20.709
2019-12-22_02:00:00	2019-12-22 12:00:02	0	1.08	0.97	0.05	0	0	303.02	4.61	2.33	29.87	5.16537	243.187	290.8	28.3	3.7	125.6	316.2	3163																	84001.4	84001.4			2.4649	262.116			2.1473	16.5272
2019-12-22_03:00:00	2019-12-22 13:00:02	0	1.03	0.93	0.05	0	0	303.83	4.38	2.6	30.68	5.09356	239.306	278.1	29.1	4.5	125.2	304.1	2888																	76823.2	76823.2			2.4964	316.84			0.352319	22.9783
2019-12-22_04:00:00	2019-12-22 14:00:02	0	1.1	1	0.06	0	0	303.82	2.68	3.7	30.67	4.56863	215.917	234.2	28.8	4.9	121.8	258.3	3954																	54382.2	54382.2			3.4969	305.9			0.109805	21.7961
2019-12-22_05:00:00	2019-12-22 15:00:02	0	1.32	1.2	0.07	0	0	302.33	-2	4.28	29.18	4.72424	154.954	193.8	26.8	4.9	120.7	211.8	8577																	37094.8	37094.8			5.6644	196			0.0308932	23.2732
2019-12-22_06:00:00	2019-12-22 16:00:02	0	2.67	2.43	0.14	0	0	301.61	-3.33	1.4	28.46	3.61233	112.803	150.7	25.2	4.6	119.1	163.8	5235																	21984	21984			10.6276	136.422			0.9755	11.644
2019-12-22_07:00:00	2019-12-22 17:00:02	0	3.73	3.38	0.18	0	0	300.18	-3.87	-2.1	27.03	4.40306	61.5143	151.3	23.5	4.5	119.9	165.6	4044																	21880.3	21880.3			12.4609	73.1025			0.00939819	16.8351
2019-12-22_08:00:00	2019-12-22 18:00:02	0	2.44	2.22	0.12	0	0	300.2	-2.42	-0.81	27.05	2.55196	71.4942	120.3	22.2	2.9	112.1	134.8	5039																	13942.9	13942.9			23.5225	52.8529			0.121132	0.425052
2019-12-22_09:00:00	2019-12-22 19:00:02	0	7.92	6.89	0.35	0	0	296.86	-2.24	1.05	23.71	2.47388	115.115	76.8	20.3	3.7	118.1	90.8	5881																	4887.41	4887.41			11.6281	11.6281			1.50336	1.88756
2019-12-22_10:00:00	2019-12-22 20:00:02	0	7.51	6.7	0.35	0	0	295.77	-2.67	-1.37	22.62	3.00097	62.8374	46.7	19.1	2.7	114.4	61.8	6117																	1600	2735.29			12.3904	12.3904			0.0905808	0.811741
2019-12-22_11:00:00	2019-12-22 21:00:02	0	7.85	5.9	0.27	0	0	294.91	-2.84	-5.79	21.76	6.44901	26.1281	38.4	18.7	3.5	117	54.8	5725																	1056.25	3769.96			9.3636	9.3636			8.69665	26.5123
2019-12-22_12:00:00	2019-12-22 22:00:02	0	8.06	5.83	0.25	0	0	294.28	-2.13	-6.22	21.13	6.5746	18.9035	39.7	17.7	3.3	116.5	55	5068																	1147.18	3620.43			11.7649	11.7649			10.723	25.7515
2019-12-22_13:00:00	2019-12-22 23:00:02	0	8.18	6.15	0.28	0	0	293.6	-1.53	-5.33	20.45	5.54525	16.0164	42.4	16.7	2.9	114.6	57.5	4372																	1314.06	3266.12			14.0625	23.3289			6.99735	13.2878
2019-12-22_14:00:00	2019-12-23 00:00:02	0	10.76	8.39	0.39	0	0	293.09	-1.43	0.03	19.94	1.43031	91.2017	40.4	16.1	2.4	114.5	51.6	3287																	1024.64	3238.75			14.7456	35.2836			0.94029	0.94029
2019-12-22_15:00:00	2019-12-23 01:00:02	0	14.21	10.8	0.46	0	0	291.06	-2.89	1.56	17.91	3.28416	118.36	43.6	15.5	3.2	120.8	54.1	3345																	1075.84	2631.69			5.8081	73.4449			0.00708273	2.83639
2019-12-22_16:00:00	2019-12-23 02:00:02	0	12.57	10.43	0.52	0	0	292.28	-2.17	-3.53	19.13	4.14365	31.5804	39.9	15.4	3.3	119.4	49.1	3225																	868.481	3065.84			13.9129	55.5025			0.711738	6.98886
2019-12-22_17:00:00	2019-12-23 03:00:02	0	14.13	12.23	0.64	0	0	290.75	-1.18	-2.08	17.6	2.3914	29.5667	20.4	15.4	3	119.2	25.9	2082																	66.7489	5339.22			4.84	80.6404			0.370392	0.370392
2019-12-22_18:00:00	2019-12-23 04:00:02	0	15.33	12.89	0.64	0	0	290.18	-2.13	0.18	17.03	2.13759	94.8303	21.9	15.5	2.5	118.9	26.3	1276																	81.1801	5028.23			2.3409	89.3025			0.131339	0.131339
2019-12-22_19:00:00	2019-12-23 05:00:02	0	15.34	12.61	0.59	0	0	289.02	-1.98	1.17	15.87	2.29985	120.579	27	15.3	2.6	119.1	31.6	923																	207.072	4367.89			0.3249	116.856			0.0900913	0.0900913
2019-12-22_20:00:00	2019-12-23 06:00:02	0	14.95	12.77	0.63	0	0	290.28	-1.05	-0.11	17.13	1.05575	84.0195	31.7	15.3	2.5	119.4	37.3	964																	358.345	3749.11			3.3489	91.2025			2.08587	2.08587
2019-12-22_21:00:00	2019-12-23 07:00:02	0	12.15	10.57	0.54	0	0	294.84	0.49	-2.41	21.69	2.45931	348.507	27.5	15.6	2.5	119	33.9	868																	286.625	4573.82			37.0881	37.0881			0.00165577	0.0253793
2019-12-22_22:00:00	2019-12-23 08:00:02	0	4.95	4.04	0.19	0	0	297.9	1.92	-4.61	24.75	4.99385	337.389	26.5	17	3.2	121.8	32.9	842																	504.452	5649.03			60.0625	60.0625			3.21788	11.5182
2019-12-22_23:00:00	2019-12-23 09:00:02	0	4.45	3.63	0.16	0	0	300.28	3.57	-4.93	27.13	6.08685	324.09	28.2	20	2.8	122.3	35.3	1034																	603.685	5456.78			50.8369	50.8369			10.8034	16.7024
2019-12-23_00:00:00	2019-12-23 10:00:02	0	3.52	2.91	0.13	0	0	302.08	5.42	-4.62	28.93	7.12185	310.444	31.3	23.2	2.6	131.3	39.7	1215																	805.992	5110.82			32.8329	103.023			20.4472	24.2246
2019-12-23_01:00:00	2019-12-23 11:00:02	0	2.43	1.9	0.08	0	0	301.31	5.2	-3.22	28.16	6.11624	301.767	38.5	25.8	1.7	123.9	49.4	560																	1339.56	4264.09			5.5696	143.52			19.5032	19.5032
2019-12-23_02:00:00	2019-12-23 12:00:02	0.01	3.14	2.37	0.1	0	0	301.44	5.48	-1.4	28.29	5.65601	284.331	42.5	27.6	1.4	175.3	55.1	449																	1610.42	3700.29			0.4761	193.488			18.1136	18.1136
2019-12-23_03:00:00	2019-12-23 13:00:02	0.04	3.94	2.86	0.12	0	0	300.95	3.61	0.05	27.8	3.61035	269.206	49	28.9	1.4	264.5	63.3	534																	2128.9	2898.75			1.21	216.678			4.88563	4.88563
2019-12-23_04:00:00	2019-12-23 14:00:02	0.02	4.47	3.4	0.14	0	0	300.68	1.46	3.04	27.53	3.37242	205.653	48.8	28.9	2.9	143.3	64.1	769																	2061.16	2862.25			1.8769	208.803			0.223178	2.16801
2019-12-23_05:00:00	2019-12-23 15:00:02	0.01	7.98	5.82	0.22	0	0	297.88	-1.99	3.15	24.73	3.72594	147.717	57.2	27.5	3.7	124.6	72.1	666																	2639.9	2639.9			7.6729	105.063			0.000672683	6.89554
2019-12-23_06:00:00	2019-12-23 16:00:02	0.02	8.8	6.31	0.24	0	0	297.41	-3.03	2.37	24.26	3.84679	128.032	72.2	26.5	3.5	122.5	87.9	675																	4341.49	4341.49			5.0176	77.0884			0.120264	6.48614
2019-12-23_07:00:00	2019-12-23 17:00:02	0.03	7.96	5.84	0.24	0	0	298.11	-2.86	1.3	24.96	3.14159	114.444	133.7	25.5	3.5	123.1	150.7	695																	16348.2	16348.2			0.2916	71.9104			0.128456	3.39146
2019-12-23_08:00:00	2019-12-23 18:00:02	0.02	11.78	8.79	0.39	0	0	296.17	-4.44	1.73	23.02	4.76513	111.288	123.2	23.1	2.6	122.7	143.1	701																	13089.6	13089.6			0.0064	17.1396			4.6878	6.57991
2019-12-23_09:00:00	2019-12-23 19:00:02	0.01	12.8	9.55	0.42	0	0	293.79	-3.95	0.76	20.64	4.02245	100.891	137	21.5	2.6	120.3	153.5	917																	16243.5	16243.5			0.7396	0.7396			2.02336	3.32132
2019-12-23_10:00:00	2019-12-23 20:00:02	0	11.46	8.3	0.35	0	0	292.83	-3.14	-0.01	19.68	3.14002	89.8177	102.7	19.7	3	121.4	115.4	1185																	8911.36	8911.36			0.0004	6.76			0.0196045	1.79564
2019-12-23_11:00:00	2019-12-23 21:00:02	0	10.11	6.61	0.24	0	0	293.18	-3.87	-1.04	20.03	4.00731	74.9582	69	18.9	2.1	118.7	77.3	1315																	3892.51	3892.51			1.2769	9.3025			3.63782	3.63782
2019-12-23_12:00:00	2019-12-23 22:00:02	0	9.51	5.74	0.17	0	0	292.42	-4.09	-2.71	19.27	4.90634	56.472	44.9	18.8	2	122.4	51.2																		1533.51	3031.6			0.2209	15.2881			8.44683	8.44683
2019-12-23_13:00:00	2019-12-23 23:00:02	0	12.01	6.12	0.14	0	0	292.03	-4.61	-6.08	18.88	7.6301	37.1704	46	18.6	1.6	132.8	51.8	1511																	1590.41	2870.82			0.0784	20.25			36.3622	36.3622
2019-12-23_14:00:00	2019-12-24 00:00:02	0	15.32	7.67	0.16	0	0	291.3	-4.08	-6.98	18.15	8.08497	30.3075	58.8	17.9	1.5	118.6	67	1464																	2614.28	2614.28			0.0625	35.1649			43.3619	43.3619
2019-12-23_15:00:00	2019-12-24 01:00:02	0	17.56	9.08	0.2	0	0	290.92	-3.81	-6.55	17.77	7.57751	30.1858	65.1	18.3	1.6	130.7	74.9	2976																	3138.24	3138.24			0.2809	34.9281			35.7306	35.7306
2019-12-23_16:00:00	2019-12-24 02:00:02	0.01	16.06	8.28	0.18	0	0	290.61	-3.29	-6.77	17.46	7.52708	25.9183	63.3	18.1	1.5	121.5	70.3	2537																	3027.2	3027.2			0.4096	41.2164			36.3257	36.3257
2019-12-23_17:00:00	2019-12-24 03:00:02	0.02	13.98	7.25	0.17	0	0	290.62	-2.89	-6.3	17.47	6.93124	24.6424	62.2	18.3	2.2	137	68.3	3125																	3019.5	3019.5			0.6889	38.5641			22.3846	22.3846
2019-12-23_18:00:00	2019-12-24 04:00:02	0.02	12.92	6.77	0.16	0	0	290.61	-2.16	-6.49	17.46	6.84001	18.4086	53.9	17.9	1.7	118.2	58.9	2800																	2221.24	2221.24			0.1936	43.8244			26.4197	26.4197
2019-12-23_19:00:00	2019-12-24 05:00:02	0	2	1.7	0.09	0	0	291.04	0.63	-4.25	17.89	4.29644	351.568	51.8	17.9	1.1	126.3	57.4	2395																	2510.01	2724.84			0.0001	38.3161			10.2172	10.2172
2019-12-23_20:00:00	2019-12-24 06:00:02	0	2.88	2.56	0.14	0	0	292.8	3.41	-4.52	19.65	5.66202	322.968	42.4	18	0.7	140.8	45.4	1147																	1587.23	3689.35			2.7225	18.7489			24.6217	24.6217
2019-12-23_21:00:00	2019-12-24 07:00:02	0	3.13	2.81	0.15	0	0	293.88	3.89	-4.79	20.73	6.17059	320.92	23.9	18.4	0.4	122.1	25.5	1012																	444.788	6239.42			5.4289	8.1225			33.2997	33.2997
2019-12-23_22:00:00	2019-12-24 08:00:02	0	1.59	1.44	0.08	0	0	296.52	4.44	-4.13	23.37	6.06387	312.928	16.1	19	0.8	89.2	17.7	1181																	214.916	7772.19			19.0969	19.0969			27.7083	27.7083
2019-12-23_23:00:00	2019-12-24 09:00:02	0	0.82	0.74	0.04	0	0	298.35	3.8	-1.58	25.2	4.11539	292.577	4.9	20.8	1.5	102.6	6.6	2117																	17.3056	10012			19.36	19.36			6.84024	6.84024
2019-12-24_00:00:00	2019-12-24 10:00:02	0	0.6	0.55	0.03	0	0	299.67	3.79	0.52	26.52	3.82551	262.188	5.4	23.6	0.2	103.9	7.9	1337																	23.5225	9950.06			8.5264	66.2596			13.1443	13.1443
2019-12-24_01:00:00	2019-12-24 11:00:02	0	0.6	0.55	0.03	0	0	299.87	2.71	1.27	26.72	2.99282	244.891	13.1	24.8	0.9	226.1	18.1	1676																	157.502	8473.2			3.6864	91.0116			4.37992	4.37992
2019-12-24_02:00:00	2019-12-24 12:00:02	0	0.72	0.66	0.03	0	0	298.88	0.64	3.74	25.73	3.79436	189.711	23.8	25.8	1.2	187.6	32.4	1352																	535.46	6599.94			0.0049	91.2025			6.73073	6.73073
2019-12-24_03:00:00	2019-12-24 13:00:02	0	1.23	1.06	0.05	0	0	296.12	-2.04	3.6	22.97	4.13783	150.461	26.1	20.1	4.3	132.5	34.3	1125																	627.002	6168.53			8.2369	8.2369			0.0263006	13.2338
2019-12-24_04:00:00	2019-12-24 14:00:02	0	1.33	1.13	0.06	0	0	293.85	-2.23	-0.6	20.7	2.30931	74.9409	10.3	18.3	0.5	58.5	14.3	1061																	84.0889	8886.83			5.76	8.8804			3.27359	3.96286
2019-12-24_05:00:00	2019-12-24 15:00:02	0	1.6	1.18	0.05	0	0	294.51	-1.06	1.15	21.36	1.564	137.332	11.9	21.1	2.1	113.9	14	888																	114.918	8578.46			0.0676	0.2304			0.287295	1.29049
2019-12-24_06:00:00	2019-12-24 16:00:02	0	2.29	1.25	0.04	0	0	293.98	-5.64	4.82	20.83	7.41903	130.517	15.7	21	1.5	99.3	18	787																	208.802	7876.56			0.0289	0.0289			35.0349	35.0349
2019-12-24_07:00:00	2019-12-24 17:00:02	0	1.58	1.15	0.05	0	0	293.6	-7	-0.68	20.45	7.03295	84.4517	19.2	19.6	4.2	124	21.9	431																	325.803	7284.62			0.7225	3.7249			8.02561	41.3829
2019-12-24_08:00:00	2019-12-24 18:00:02	0	1.63	1.03	0.04	0	0	290.11	-6.07	-5.44	16.96	8.15098	48.1331	16.2	19.1	3.5	118.8	18.1	224																	230.129	7826.94			4.5796	35.0464			21.6316	46.9359
2019-12-24_09:00:00	2019-12-24 19:00:02	0	2.96	2.53	0.12	0	0	289.66	-4.77	-6.19	16.51	7.81467	37.6179	14.8	19	2.9	118.8	16.5	362																	150.553	7809.26			6.2001	41.8609			24.1539	34.9833
2019-12-24_10:00:00	2019-12-24 20:00:02	0	3.1	2.64	0.12	0	0	289.72	-4.53	-3.63	16.57	5.80498	51.2941	17	18.7	2.2	116.1	18.6	635																	206.21	7406.32			4.5369	45.0241			12.9959	12.9959
2019-12-24_11:00:00	2019-12-24 21:00:02	0	2.7	2.1	0.09	0	0	289.35	-4.91	-3.33	16.2	5.93271	55.8547	18	18.3	2	115	20.5	800																	252.81	7327.36			4.41	55.9504			15.4662	15.4662
2019-12-24_12:00:00	2019-12-24 22:00:02	0	3.08	2.7	0.12	0	0	288.24	-3.36	-1.72	15.09	3.77465	62.892	18.1	18.2	1.9	115.1	21.3	786																	237.16	7208.01			9.6721	75.5161			3.51432	3.51432
2019-12-24_13:00:00	2019-12-24 23:00:02	0	3.27	2.95	0.14	0	0	287.91	-3.6	-2.42	14.76	4.33779	56.0903	17.8	18.2	1.8	109.8	20.8	794																	220.523	7216.5			11.8336	81.3604			6.44037	6.44037
2019-12-24_14:00:00	2019-12-25 00:00:02	0	3.05	2.74	0.12	0	0	287.53	-2.77	0.08	14.38	2.77115	91.6541	13.4	17.7	2.5	119	15.5	642																	113.636	8020.99			11.0224	98.01			0.073525	0.221987
2019-12-24_15:00:00	2019-12-25 01:00:02	0	2.87	2.49	0.11	0	0	286.2	-2.93	0.17	13.05	2.93493	93.3205	14.9	17.1	2	119.3	17.2	703																	154.008	7798.66			16.4025	139.949			0.87409	0.87409
2019-12-24_16:00:00	2019-12-25 02:00:02	0	2.56	2.18	0.09	0	0	285.85	-3.03	0.07	12.7	3.03081	91.3233	12.1	17	2.3	117.9	14.7	661																	98.4064	8357.62			18.49	150.798			0.534081	0.534081
2019-12-24_17:00:00	2019-12-25 03:00:02	0	2.15	1.75	0.07	0	0	285.83	-3.67	0.47	12.68	3.69997	97.2977	9.9	16.9	3	120	12.4	494																	66.4225	8845.4			17.8084	153.76			0.489962	3.6099
2019-12-24_18:00:00	2019-12-25 04:00:02	0	1.86	1.49	0.06	0	0	285.61	-3.91	0.39	12.46	3.9294	95.6959	8.9	16.7	3	119.6	11.4	501																	54.9081	9084			17.9776	164.352			0.863788	4.53435
2019-12-24_19:00:00	2019-12-25 05:00:02	0	1.75	1.35	0.05	0	0	285.35	-3.76	0.06	12.2	3.76048	90.9141	7.3	16.5	2.9	120.1	9.5	564																	35.4025	9418.7			18.49	176.358			0.740424	3.46138
2019-12-24_20:00:00	2019-12-25 06:00:02	0	1.72	1.31	0.05	0	0	287.04	-4.08	-0.39	13.89	4.0986	84.5399	9.6	16.5	2.6	119.9	11.5	614																	68.7241	8985.14			6.8121	134.328			2.24579	3.60467
2019-12-24_21:00:00	2019-12-25 07:00:02	0	1.93	1.54	0.06	0	0	289.54	-5.06	0.15	16.39	5.06222	91.6978	8.8	16.9	2.8	119.4	10.5	585																	52.7076	9093.53			0.2601	75.5161			5.11765	9.37721
2019-12-24_22:00:00	2019-12-25 08:00:02	0	2.72	1.89	0.07	0	0	291.22	-5.26	0.96	18.07	5.34689	100.343	9	17.8	3.3	117.5	11	458																	50.5521	8988.94			0.0729	37.3321			4.18975	14.7985
2019-12-24_23:00:00	2019-12-25 09:00:02	0	3.53	2.06	0.06	0	0	292.75	-5.14	1.37	19.6	5.31945	104.924	14.5	18.6	3.6	118.4	16.9	416																	154.754	7945.94			1	14.2884			2.95649	16.9698
2019-12-25_00:00:00	2019-12-25 10:00:02	0	4.22	2.04	0.04	0	0	293.99	-5.14	2.21	20.84	5.59497	113.266	15.1	19	3.9	120.6	17.6	394																	170.564	7842.87			3.3856	4.5796			2.87293	22.0428
2019-12-25_01:00:00	2019-12-25 11:00:02	0	4.89	1.96	0.03	0	0	293.62	-5.9	2.86	20.47	6.55665	115.861	12.9	19.6	3.5	122	15.2	412																	119.684	8251.91			0.7569	3.6481			9.34308	27.6323
2019-12-25_02:00:00	2019-12-25 12:00:02	0	5.69	2.09	0.02	0	0	293.47	-5.65	3.04	20.32	6.41593	118.282	9.3	19.7	3.6	122.7	10.9	380																	51.9841	8894.38			0.3844	3.8416			7.92944	27.2059
2019-12-25_03:00:00	2019-12-25 13:00:02	0	7.23	2.46	0.01	0	0	293.68	-5.98	3.09	20.53	6.73116	117.326	6	20.9	4.5	127.6	6.7	342																	12.5316	9455.62			0.1369	0.3025			4.97807	41.3598
2019-12-25_04:00:00	2019-12-25 14:00:02	0	13.22	4.43	0	0	0	293.31	-5.96	3.76	20.16	7.04693	122.247	2.5	21.9	5.1	122.9	3.1	274																	3.7249	9755.51			3.0276	3.0276			3.79053	53.9774
2019-12-25_05:00:00	2019-12-25 15:00:02	0	16.7	5.64	0	0	0	292.6	-6.49	3.68	19.45	7.46073	119.554	6.5	22	5.1	124.2	7.6	300																	0.7396	8753.47			6.5025	6.5025			5.57305	60.2289
2019-12-25_06:00:00	2019-12-25 16:00:02	0	12.03	4.1	0	0	0	292.7	-6.42	2.19	19.55	6.78325	108.835	6.6	22.1	4.7	122.7	7.1	298																	6.25	9025			6.5025	6.5025			4.33994	44.6658
2019-12-25_07:00:00	2019-12-25 17:00:02	0	15.88	5.21	0	0	0	291.27	-6.2	1.13	18.12	6.30213	100.329	9.7	21.4	4.4	119.7	10.5	341																	20.1601	8242.82			10.7584	10.7584			3.61812	34.8352
2019-12-25_08:00:00	2019-12-25 18:00:02	0	19.16	6.31	0	0	0	290.59	-5.89	-0.42	17.44	5.90496	85.9214	13.5	20.7	4.1	121	14.4	459																	51.6961	7377.09			10.6276	14.7456			3.25786	27.0916
2019-12-25_09:00:00	2019-12-25 19:00:02	0	18.6	6.22	0	0	0	289.27	-4.78	-0.42	16.12	4.79842	84.9787	12.4	19.1	3.9	119	13.7	436																	38.1924	7582.93			8.8804	45.6976			0.807152	15.1977
2019-12-25_10:00:00	2019-12-25 20:00:02	0	15.6	5.43	0	0	0	288.13	-4.52	-1	14.98	4.6293	77.525	9.2	17.3	2.8	119.8	11.2	296																	14.2129	8293.74			5.3824	94.09			3.34633	6.91321
2019-12-25_11:00:00	2019-12-25 21:00:02	0	14.17	5.05	0	0	0	287.43	-4.26	-0.84	14.28	4.34203	78.8455	5.9	16.7	2.8	120.3	8.2	149																	0.7225	8977.56			5.8564	121			2.37785	5.48509
2019-12-25_12:00:00	2019-12-25 22:00:02	0	12.4	4.53	0	0	0	288.08	-5.08	-1.44	14.93	5.28015	74.174	6.4	16.4	2.8	119.4	7.1	76																	3.4969	8981.35			2.1609	113.422			6.15115	10.7594
2019-12-25_13:00:00	2019-12-25 23:00:02	0	12.58	4.57	0	0	0	288.02	-4.99	-1.27	14.87	5.14908	75.721	4.3	16.7	2.3	117.8	4.9	156																	0.0729	9376.05			3.3489	108.368			8.11724	8.11724
2019-12-25_14:00:00	2019-12-26 00:00:02	0	11.83	4.42	0	0	0	287.69	-4.56	-1.22	14.54	4.72038	75.0218	3.2	16.6	2.7	120.9	3.9	108																	1.4884	9619.69			4.2436	117.506			4.08194	6.8664
2019-12-25_15:00:00	2019-12-26 01:00:02	0	10.59	4.17	0.01	0	0	285.92	-3.62	-0.79	12.77	3.7052	77.6894	4.9	16.4	2.8	121	5.9	144																	0.5329	9337.36			13.1769	164.096			0.819385	2.9077
2019-12-25_16:00:00	2019-12-26 02:00:02	0	9.13	3.9	0.01	0	0	285.4	-3.53	-1.24	12.25	3.74146	70.645	5.4	16.1	1.1	107.1	6.3	231																	2.25	9292.96			14.8225	185.777			6.97729	6.97729
2019-12-25_17:00:00	2019-12-26 03:00:02	0	9.09	4.01	0.02	0	0	284.88	-3.21	-1.08	11.73	3.38681	71.4047	4.8	15.3	1.2	119.9	5.7	275																	0.6241	9387.67			12.7449	223.502			4.78215	4.78215
2019-12-25_18:00:00	2019-12-26 04:00:02	0	9.28	4.18	0.02	0	0	285.07	-3.53	-1.05	11.92	3.68285	73.435	3.1	14.9	1.7	118.6	4.4	363																	1.1664	9686.5			8.8804	229.826			3.9317	3.9317
2019-12-25_19:00:00	2019-12-26 05:00:02	0	9.61	4.3	0.02	0	0	285.14	-3.75	-0.84	11.99	3.84293	77.3743	3.5	14.4	2.2	121	5.9	224																	0.64	9584.41			5.8081	243.048			2.69921	2.69921
2019-12-25_20:00:00	2019-12-26 06:00:02	0	9.88	4.36	0.02	0	0	285.32	-3.84	-0.8	12.17	3.92245	78.2319	9.7	14.6	2.7	122.2	13	221																	28.5156	8397.89			5.9049	231.344			1.49438	3.32132
2019-12-25_21:00:00	2019-12-26 07:00:02	0	9.49	4.29	0.03	0	0	286.37	-3.95	-1.01	13.22	4.07708	75.6571	13.2	15.3	2.9	119.7	16.9	236																	79.3881	7781			4.3264	181.172			1.38552	4.73969
2019-12-25_22:00:00	2019-12-26 08:00:02	0	8.81	4.09	0.04	0	0	288.48	-4.58	-0.11	15.33	4.58132	88.6243	11.7	17.2	2.4	107.4	15.4	112																	57.9121	8083.81			3.4969	89.3025			4.75816	4.75816
2019-12-25_23:00:00	2019-12-26 09:00:02	0	8.45	3.98	0.04	0	0	290.42	-4.96	0.83	17.27	5.02897	99.4996	15.5	19	2.6	116.2	19.2	175																	132.71	7433.89			2.9929	32.6041			5.89988	8.00305
2019-12-26_00:00:00	2019-12-26 10:00:02	0	8.64	4.13	0.06	0	0	292.16	-5.25	2.22	19.01	5.70008	112.921	15	20.7	2.3	114.8	18.9	194																	118.157	7494.36			2.8561	5.1529			11.5605	11.5605
2019-12-26_01:00:00	2019-12-26 11:00:02	0	8.82	5.03	0.12	0	0	293.34	-5.32	3.25	20.19	6.23417	121.421	14.3	21.7	3.2	118.2	18.4	125																	85.9329	7459.78			2.2801	2.2801			9.2062	21.4755
2019-12-26_02:00:00	2019-12-26 12:00:02	0	10.89	6.53	0.18	0	0	293.98	-5.41	3.54	20.83	6.46527	123.198	12.5	23	2.6	111.6	16.4	116																	35.6409	7511.69			4.7089	4.7089			14.9403	18.1925
2019-12-26_03:00:00	2019-12-26 13:00:02	0	13.08	8.13	0.24	0	0	294.32	-5.37	3.6	21.17	6.46505	123.837	14.3	23.3	4.2	130.9	17.9	198																	38.0689	6933.89			4.5369	6.2001			5.13046	34.3988
2019-12-26_04:00:00	2019-12-26 14:00:02	0	13.53	8.78	0.27	0	0	294.51	-5.45	3.46	21.36	6.45555	122.41	14.7	24.1	3.9	124.9	18.7	325																	35.0464	6760.13			7.5076	12.1104			6.53083	30.8641
2019-12-26_05:00:00	2019-12-26 15:00:02	0	12.84	8.56	0.27	0	0	294.46	-5.5	3.47	21.31	6.50315	122.248	14.1	24.7	3.6	122.3	17.9	449																	30.6916	6895.64			11.4921	16.2409			8.42825	28.1234
2019-12-26_06:00:00	2019-12-26 16:00:03	0	11.55	7.05	0.19	0	0	293.94	-5.66	3.42	20.79	6.61302	121.142	13.4	25.1	3.4	121.6	16.9	519																	40.3225	7267.56			18.5761	18.5761			10.3235	27.1756
2019-12-26_07:00:00	2019-12-26 17:00:03	0	9.91	5.21	0.1	0	0	293.02	-5.73	3.13	19.87	6.52915	118.645	18.4	24.9	3.4	125	22.4	527																	173.976	6738.77			25.3009	25.3009			9.79158	26.3082
2019-12-26_08:00:00	2019-12-26 18:00:03	0	8.57	3.72	0.03	0	0	291.54	-5.79	2.61	18.39	6.35108	114.265	20.8	24.5	2.6	112.9	25.2	594																	291.726	6590.19			37.3321	37.3321			14.0706	17.2315
2019-12-26_09:00:00	2019-12-26 19:00:03	0	8.6	3.42	0.01	0	0	289.21	-4.26	1.82	16.06	4.63249	113.133	18.7	22.8	2.2	112.4	23.7	569																	233.478	6985.62			45.4276	45.4276			5.91703	5.91703
2019-12-26_10:00:00	2019-12-26 20:00:03	0	8.96	3.5	0	0	0	287.46	-3.46	0.74	14.31	3.53825	102.072	11.1	20.7	2.1	116.8	16.5	545																	57.76	8299.21			40.8321	48.5809			2.06856	2.06856
2019-12-26_11:00:00	2019-12-26 21:00:03	0	8.4	3.37	0	0	0	286.09	-3.09	-0.76	12.94	3.18209	76.1822	9.5	19	2.1	117.3	14.6	510																	37.5769	8617.41			36.7236	100.802			1.17092	1.17092
2019-12-26_12:00:00	2019-12-26 22:00:03	0	7.17	3.02	0	0	0	285.16	-3.25	-2.03	12.01	3.83189	58.0106	6.5	17.7	1.6	112	11.8	448																	12.1104	9250.59			32.3761	150.553			4.98134	4.98134
2019-12-26_13:00:00	2019-12-26 23:00:03	0	6.96	2.99	0	0	0	284.31	-3.14	-2.51	11.16	4.01991	51.3626	5.9	16.6	1.8	116.9	11	416																	8.4681	9372.18			29.5936	202.208			4.92801	4.92801
2019-12-26_14:00:00	2019-12-27 00:00:03	0	6.8	2.97	0	0	0	283.49	-3.09	-2.77	10.34	4.14982	48.1258	5.8	15.7	1.7	119.3	10.6	396																	8.0089	9395.42			28.7296	254.084			6.00161	6.00161
2019-12-26_15:00:00	2019-12-27 01:00:03	0	6.93	3.04	0	0	0	282.83	-3.12	-2.73	9.68	4.14576	48.8142	4	14.9	1.8	121.3	9.1	498																	0.9216	9733.8			27.2484	302.76			5.50258	5.50258
2019-12-26_16:00:00	2019-12-27 02:00:03	0	7.18	3.1	0	0	0	282.53	-3.36	-2.81	9.38	4.38015	50.0941	4.5	14.2	1.9	120.5	9.4	556																	1.96	9623.61			23.2324	338.56			6.15114	6.15114
2019-12-26_17:00:00	2019-12-27 03:00:03	0	7.59	3.19	0	0	0	282.47	-3.27	-2.74	9.32	4.2662	50.0398	4.5	13.6	1.2	116.5	8.8	610																	1.7161	9605.96			18.3184	363.284			9.40161	9.40161
2019-12-26_18:00:00	2019-12-27 04:00:03	0	8.39	3.44	0	0	0	282.64	-3.46	-2.38	9.49	4.19952	55.4775	5.1	13	1.2	117.7	9	559																	2.7556	9440.07			12.3201	379.86			8.99714	8.99714
2019-12-26_19:00:00	2019-12-27 05:00:03	0	8.49	3.47	0	0	0	283.15	-3.71	-2.13	10	4.27797	60.139	3.6	12.2	0.9	113.8	7.1	654																	0.0169	9727.88			4.84	391.248			11.4107	11.4107
2019-12-26_20:00:00	2019-12-27 06:00:03	0	8.21	3.37	0	0	0	284	-3.99	-2.36	10.85	4.6357	59.3967	9.4	12.9	1.4	118.3	12.4	637																	36.3609	8635.98			4.2025	332.333			10.4697	10.4697
2019-12-26_21:00:00	2019-12-27 07:00:03	0	6.84	2.86	0	0	0	286.08	-4.18	-1.9	12.93	4.59156	65.5562	3.9	14.6	1.7	115.3	7.6	335																	1.0816	9789.12			2.7889	208.802			8.3611	8.3611
2019-12-26_22:00:00	2019-12-27 08:00:03	0	5.49	2.29	0	0	0	288.65	-4.49	-1.52	15.5	4.74031	71.2976	5.3	16.8	1.6	99.8	8.7	234																	9.0601	9625.57			1.69	93.7024			9.86152	9.86152
2019-12-26_23:00:00	2019-12-27 09:00:03	0	4.48	1.86	0	0	0	290.76	-4.36	-0.9	17.61	4.45192	78.3368	4.7	18.6	2.6	122.1	8.4	198																	8.0656	9828.74			0.9801	33.2929			3.42961	5.07115
2019-12-27_00:00:00	2019-12-27 10:00:03	0	4.47	1.84	0	0	0	292.6	-3.97	-0.19	19.45	3.97454	87.2601	3.4	20.3	2.8	123.2	6.9	210																	2.4336	10092.2			0.7225	4.9729			1.37955	3.89882
2019-12-27_01:00:00	2019-12-27 11:00:03	0	4.78	1.94	0	0	0	294.13	-3.55	0.42	20.98	3.57476	96.7471	2.4	21.8	3.6	127	6.2	131																	0.2116	10273.8			0.6724	0.6724			0.000637122	5.63948
2019-12-27_02:00:00	2019-12-27 12:00:03	0	4.97	1.99	0	0	0	295.44	-3.26	1.09	22.29	3.4374	108.488	3	23.5	2.3	116.8	7.2	116																	1.0201	10142.5			1.4641	14.5161			1.29367	1.29367
2019-12-27_03:00:00	2019-12-27 13:00:03	0	5.35	2.11	0	0	0	296.37	-3.5	1.95	23.22	4.00656	119.124	6.8	24.9	3.1	124	10.3	116																	21.9961	9368.3			2.8224	37.6996			0.821846	5.32021
2019-12-27_04:00:00	2019-12-27 14:00:03	0	5.91	2.3	0	0	0	296.84	-4.24	2.93	23.69	5.15388	124.646	6.5	25.7	3.5	128.2	9.8	130																	17.64	9389.61			4.0401	54.9081			2.73533	14.8524
2019-12-27_05:00:00	2019-12-27 15:00:03	0	6.5	2.51	0	0	0	296.8	-4.79	3.35	23.65	5.84522	124.968	10.2	26.5	3.4	127.1	14.6	244																	59.1361	8647.14			8.1225	66.7489			5.9791	19.76
2019-12-27_06:00:00	2019-12-27 16:00:03	0	6.82	2.62	0	0	0	296.41	-4.93	3.01	23.26	5.77624	121.406	17.5	26.6	4.1	131.9	21.3	166																	221.414	7323.94			11.1556	62.0944			2.8098	25.7683
2019-12-27_07:00:00	2019-12-27 17:00:03	0	7.48	2.87	0	0	0	295.72	-5.05	1.94	22.57	5.40982	111.015	14.5	26.3	4.3	128.5	18.1	136																	135.257	7802.19			13.9129	47.4721			1.23169	24.1063
2019-12-27_08:00:00	2019-12-27 18:00:03	0	8.43	3.24	0	0	0	294.37	-4.71	0.34	21.22	4.72226	94.1287	16.1	25.5	4.2	123.7	20.2	92																	165.38	7458.05			18.3184	22.4676			0.272751	16.993
2019-12-27_09:00:00	2019-12-27 19:00:03	0	8.63	3.34	0	0	0	291.54	-3.19	-0.6	18.39	3.24594	79.348	12.8	23.9	2.5	115.5	17.5	70																	89.4916	8020.99			30.3601	30.3601			0.55642	0.894795
2019-12-27_10:00:00	2019-12-27 20:00:03	0	8.64	3.35	0	0	0	289.16	-2.61	-1.25	16.01	2.89389	64.4091	6.4	21.2	2	111.6	11.9	81																	9.3025	9206.4			26.9361	26.9361			0.79904	0.79904
2019-12-27_11:00:00	2019-12-27 21:00:03	0	8.93	3.46	0	0	0	287.6	-2.58	-2.59	14.45	3.65575	44.8893	5.7	19.2	2	117.3	10.5	108																	5.0176	9319.97			22.5625	69.3889			2.7415	2.7415
2019-12-27_12:00:00	2019-12-27 22:00:03	0	9.93	3.87	0	0	0	286.83	-2.79	-2.95	13.68	4.06037	43.4034	5.9	17.7	2.3	122.1	10	82																	4.1209	9202.56			16.1604	112.36			3.0989	3.0989
2019-12-27_13:00:00	2019-12-27 23:00:03	0	10.61	4.19	0	0	0	286.14	-2.51	-3.06	12.99	3.95774	39.3608	4.7	16.5	2.3	121.5	8.8	120																	0.2601	9372.18			12.3201	156			2.7481	2.7481
2019-12-27_14:00:00	2019-12-28 00:00:03	0	9.44	3.86	0	0	0	285.37	-2.33	-3.36	12.22	4.08883	34.7396	5.2	15.4	1.7	122.1	8.9	153																	1.7956	9339.29			10.1124	206.21			5.70649	5.70649
2019-12-27_15:00:00	2019-12-28 01:00:03	0	7.39	3.14	0	0	0	284.34	-2.04	-3.47	11.19	4.02523	30.4512	1.6	14.3	1.1	119	5.3	166																	2.3716	10192.9			9.6721	271.92			8.55699	8.55699
2019-12-27_16:00:00	2019-12-28 02:00:03	0	6.65	2.9	0	0	0	283.54	-1.77	-3.64	10.39	4.04753	25.9321	2	13	0.9	134.1	5.1	244																	0.81	10160.6			6.8121	345.588			9.90695	9.90695
2019-12-27_17:00:00	2019-12-28 03:00:03	0	5.18	2.35	0	0	0	282.96	-1.51	-3.77	9.81	4.06116	21.8277	3.7	12.2	0.8	113.5	6.1	242																	1.8225	9930.12			5.7121	398.801			10.6351	10.6351
2019-12-27_18:00:00	2019-12-28 04:00:03	0	3.83	1.8	0	0	0	282.89	-1.41	-3.93	9.74	4.17528	19.737	5.6	11.6	0.4	84.8	8	146																	14.44	9662.89			3.4596	426.01			14.2528	14.2528
2019-12-27_19:00:00	2019-12-28 05:00:03	0	2.87	1.4	0	0	0	282.48	-1.39	-3.56	9.33	3.82174	21.3282	-0.4	10.4	0.8	315.7	3	150																	3.24	10962.1			1.1449	495.062			9.13092	9.13092
2019-12-27_20:00:00	2019-12-28 06:00:03	0	2.54	1.27	0	0	0	286.27	-0.97	-2.63	13.12	2.80318	20.2451	4.9	10.4	0.6	311.3	7.8	120																	13.1769	9906.22			7.3984	340.772			4.85399	4.85399
2019-12-27_21:00:00	2019-12-28 07:00:03	0	2.48	1.26	0	0	0	290.75	-1.46	-1.63	17.6	2.18826	41.8511	6.1	13.8	0.4	213.5	8.6	91																	23.4256	9670.76			14.44	111.936			3.19789	4.89178
2019-12-27_22:00:00	2019-12-28 08:00:03	0	1.89	0.96	0	0	0	293.54	-1.65	-0.25	20.39	1.66883	81.3845	2.1	17.1	0.6	108.6	4.8	83																	1.2996	10535			10.8241	20.1601			1.1424	6.40681
2019-12-27_23:00:00	2019-12-28 09:00:03	0	1.56	0.79	0	0	0	295.39	-1.6	0.73	22.24	1.75866	114.525	1.9	19.1	0.6	58.3	4.9	60																	1.2321	10611.1			9.8596	9.8596			1.3425	5.96012
2019-12-28_00:00:00	2019-12-28 10:00:03	0	1.29	0.66	0	0	0	296.95	-1.77	1.45	23.8	2.2881	129.325	4.5	20.7	1.3	134.3	7.6	58																	14.7456	10108.3			9.61	9.61			0.976341	1.4687
2019-12-28_01:00:00	2019-12-28 11:00:03	0	1.2	0.6	0	0	0	298.12	-2.31	1.86	24.97	2.96575	128.841	2.4	23.2	1.9	153.8	5.9	47																	3.24	10547.3			3.1329	38.3161			1.13583	1.13583
2019-12-28_02:00:00	2019-12-28 12:00:03	0	1.33	0.68	0	0	0	299.06	-2.78	2.2	25.91	3.54519	128.357	0.7	25.6	1.9	127.5	4.4	45																	0.0004	10882.7			0.0961	90.8209			2.70666	2.70666
2019-12-28_03:00:00	2019-12-28 13:00:03	0	2.68	1.8	0.07	0	0	299.71	-3.39	2.79	26.56	4.39047	129.455	-0.8	27.4	2.8	139	2.6	57																	6.76	10962.1			0.7056	143.52			2.52959	5.71433
2019-12-28_04:00:00	2019-12-28 14:00:03	0	5.89	4.45	0.23	0	0	299.94	-3.83	3.08	26.79	4.9148	128.805	3.7	28.4	3.3	142	6.7	358																	0.5625	9516			2.5921	174.504			2.60759	11.6609
2019-12-28_05:00:00	2019-12-28 15:00:03	0	7.39	5.41	0.27	0	0	299.85	-4.32	3.1	26.7	5.31718	125.663	9	29.4	3	140.7	12.4	144																	12.8881	8333.86			7.29	199.374			5.36932	12.3706
2019-12-28_06:00:00	2019-12-28 16:00:03	0	8	5.37	0.23	0	0	299.42	-4.6	2.69	26.27	5.3288	120.318	13.9	29.8	3.5	131.3	17.8	112																	72.7609	7470.14			12.4609	198.528			3.34451	16.2312
2019-12-28_07:00:00	2019-12-28 17:00:03	0	7.87	4.42	0.13	0	0	298.55	-4.61	1.17	25.4	4.75615	104.241	15.1	29.8	3	119.3	19.2	69																	114.062	7426.99			19.36	174.768			3.08408	8.73885
2019-12-28_08:00:00	2019-12-28 18:00:03	0	7.01	3.38	0.05	0	0	296.93	-4	-1.84	23.78	4.40291	65.2977	11.6	28.7	3.2	118.5	15.8	79																	67.5684	8230.12			24.2064	110.25			1.44699	7.85629
2019-12-28_09:00:00	2019-12-28 19:00:03	0	6.38	2.69	0	0	0	293.31	-2.54	-2.79	20.16	3.77302	42.3147	8.9	27.1	2.2	118.1	13.8	77																	38.5641	8856.69			48.1636	48.1636			2.4744	2.4744
2019-12-28_10:00:00	2019-12-28 20:00:03	0	9.58	3.94	0	0	0	290.68	-2.45	-3.72	17.53	4.45431	33.3691	6.8	24	0.6	101.2	12.3	91																	8.1796	9017.4			41.8609	41.8609			14.8557	14.8557
2019-12-28_11:00:00	2019-12-28 21:00:03	0	9.68	4.1	0	0	0	288.84	-2	-4.7	15.69	5.10784	23.0514	5.3	21.5	0.8	121.3	10.9	45																	1.44	9273.69			33.7561	33.7561			18.5575	18.5575
2019-12-28_12:00:00	2019-12-28 22:00:03	0	8.07	3.57	0.01	0	0	287.87	-1.63	-4.83	14.72	5.09763	18.6483	5.8	19.9	1	130.4	10.8	57																	4.9729	9279.47			26.8324	54.1696			16.7905	16.7905
2019-12-28_13:00:00	2019-12-28 23:00:03	0	6.72	3.15	0.02	0	0	287.43	-1.41	-4.56	14.28	4.77302	17.1822	3.2	18.9	0.9	115.6	7.4	60																	0.0025	9870.42			21.3444	77.44			15.0003	15.0003
2019-12-28_14:00:00	2019-12-29 00:00:03	0	5.61	2.69	0.01	0	0	286.56	-1.05	-4.23	13.41	4.35837	13.9407	5.8	17	0.4	120.3	10	107																	9.6721	9449.78			12.8881	133.865			15.6687	15.6687
2019-12-28_15:00:00	2019-12-29 01:00:03	0	4.75	2.32	0.01	0	0	285.9	-0.69	-3.49	12.75	3.55756	11.1837	5.6	16.3	0.4	51.3	10.1	234																	10.7584	9560.93			12.6025	167.185			9.97016	9.97016
2019-12-28_16:00:00	2019-12-29 02:00:03	0	3.96	1.97	0.01	0	0	285.57	-0.06	-3.22	12.42	3.22056	1.06758	3.6	14	0.8	327.3	7.6	132																	2.6569	10026			2.4964	242.114			5.85911	5.85911
2019-12-28_17:00:00	2019-12-29 03:00:03	0	3.5	1.79	0.01	0	0	286.24	0.67	-2.04	13.09	2.14721	341.818	3.6	12.1	0.7	314.5	7.4	121																	3.2761	10062.1			0.9801	281.904			2.09441	3.8134
2019-12-28_18:00:00	2019-12-29 04:00:03	0	3.48	1.91	0.03	0	0	286.75	0.51	-1.45	13.6	1.53708	340.622	5.4	10.9	0.8	327.4	8.9	158																	12.1801	9680.59			7.29	305.55			0.54328	6.066
2019-12-28_19:00:00	2019-12-29 05:00:03	0	3.81	2.21	0.04	0	0	286.71	1.1	-1.29	13.56	1.69532	319.545	2	9.8	1	312.9	5.4	245																	0.0441	10300.2			14.1376	346.704			0.483466	4.42969
2019-12-28_20:00:00	2019-12-29 06:00:03	0	5.14	3.12	0.08	0	0	289.91	1.75	-1.05	16.76	2.04083	300.964	-1.6	10.5	1.3	309.9	1.9	205																	22.2784	10853.5			39.1876	216.678			0.548834	2.12917
2019-12-28_21:00:00	2019-12-29 07:00:03	0	7.8	5.18	0.17	0	0	293.39	2.06	0.16	20.24	2.0662	265.559	-1	14.5	1.3	295.8	2.6	181																	38.1924	10306.3			32.9476	52.4176			0.587069	2.05577
2019-12-28_22:00:00	2019-12-29 08:00:03	0	10.07	7.1	0.26	0	0	295.06	1.99	1.88	21.91	2.73761	226.628	2.2	21	1.8	289.7	6.1	145																	24.01	9292.96			0.8281	0.8649			0.87911	0.87911
2019-12-28_23:00:00	2019-12-29 09:00:03	0	9.78	7.01	0.26	0	0	296.85	1.2	2.54	23.7	2.8092	205.288	5.1	24.3	1.3	277.8	11.5	145																	3.6481	8759.09			0.36	36.2404			2.27768	2.27768
2019-12-29_00:00:00	2019-12-29 10:00:03	0	7.94	5.84	0.23	0	0	298.79	-0.2	2.39	25.64	2.39835	175.216	16	26.7	1.1	200.2	23.1	164																	103.226	7032.5			1.1236	107.33			1.68572	1.69428
2019-12-29_01:00:00	2019-12-29 11:00:03	0	5.73	4.33	0.17	0	0	300.38	-1.62	2.02	27.23	2.58936	141.271	22.2	28	2.3	147.3	28.3	150																	319.337	6267.89			0.5929	175.563			0.0837309	0.0837309
2019-12-29_02:00:00	2019-12-29 12:00:03	0	4.73	3.71	0.17	0	0	301.48	-2.7	2.07	28.33	3.40219	127.476	18.3	29.7	1.8	122	23.2	118																	212.868	7004.02			1.8769	257.603			2.56701	2.56701
2019-12-29_03:00:00	2019-12-29 13:00:03	0	7.66	6.5	0.37	0	0	302.08	-3.32	2.86	28.93	4.38201	130.743	6.8	30.9	2.8	134.4	10.5	114																	0.09	8537.76			3.8809	318.623			2.50275	5.67397
2019-12-29_04:00:00	2019-12-29 14:00:03	0	14.31	12.58	0.78	0	0	302.28	-4.12	3.2	29.13	5.21674	127.836	39.5	31.7	2.2	132.1	42.5	117																	724.686	2875.1			6.6049	355.322			9.10073	9.10073
2019-12-29_05:00:00	2019-12-29 15:00:03	0	15.98	14.02	0.88	0	0	302.01	-4.9	3.04	28.86	5.76642	121.816	23.6	32.3	2.6	126.4	25.9	133																	91.7764	4634.89			11.8336	367.872			10.0262	12.7194
2019-12-29_06:00:00	2019-12-29 16:00:03	0	13.84	11.88	0.73	0	0	301.46	-4.94	2.35	28.31	5.47048	115.441	13.9	32.5	2.3	136.4	16.4	74																	4.0804	6387.21			17.5561	354.569			10.0519	10.0519
2019-12-29_07:00:00	2019-12-29 17:00:03	0	10.02	7.98	0.44	0	0	300.46	-4.85	0.54	27.31	4.87997	96.353	14.3	32.2	2.9	115.4	16.7	166																	39.9424	6958.9			23.9121	307.301			3.92028	8.88022
2019-12-29_08:00:00	2019-12-29 18:00:03	0	6.7	4.42	0.17	0	0	298.34	-3.94	-2.24	25.19	4.53224	60.3807	13.1	30.9	2.8	115.9	16.7	343																	75.3424	7775.71			32.6041	199.092			3.00066	6.41224
2019-12-29_09:00:00	2019-12-29 19:00:03	0	5.79	2.71	0.01	0	0	294.11	-2.42	-2.66	20.96	3.59611	42.2952	15.3	28.9	1.8	113.4	20	403																	158.508	7689.54			63.0436	63.0436			3.22601	3.22601
2019-12-29_10:00:00	2019-12-29 20:00:03	0	11	5.17	0.05	0	0	292	-2.28	-4.41	18.85	4.96452	27.3394	17.7	26.2	0.8	104.5	23	329																	157.001	6860.81			54.0225	54.0225			17.3433	17.3433
2019-12-29_11:00:00	2019-12-29 21:00:03	0	11.41	5.55	0.06	0	0	290.46	-2.33	-5.27	17.31	5.7621	23.8515	19.6	24.4	0.6	69.9	24.5	275																	197.403	6488.3			50.2681	50.2681			26.6473	26.6473
2019-12-29_12:00:00	2019-12-29 22:00:03	0	10.14	5.6	0.12	0	0	289.52	-1.99	-4.92	16.37	5.30721	22.022	13.2	21.4	0.3	81.3	17.9	361																	57.76	7551.61			25.3009	25.3009			25.0722	25.0722
2019-12-29_13:00:00	2019-12-29 23:00:03	0	9.4	5.58	0.15	0	0	288.87	-1.76	-4.66	15.72	4.98128	20.6908	6.9	19.3	0.2	341.1	12.6	547																	1.7424	8689.97			12.8164	48.4416			22.8607	22.8607
2019-12-29_14:00:00	2019-12-30 00:00:03	0	8.67	5.48	0.17	0	0	288.23	-1.38	-4.52	15.08	4.72597	16.978	6.3	17.5	0.3	333.2	12.1	194																	0.6724	8820.97			5.8564	88.36			19.5892	19.5892
2019-12-29_15:00:00	2019-12-30 01:00:03	0	7.85	5.17	0.17	0	0	287.48	-1.07	-4.45	14.33	4.57683	13.5202	5.8	15.3	0.9	311.1	11.8	123																	0.3969	8973.77			0.9409	152.522			13.5191	13.5191
2019-12-29_16:00:00	2019-12-30 02:00:03	0	6.55	4.32	0.14	0	0	286.95	-0.71	-4.48	13.8	4.53591	9.00554	5.2	14.1	1	318.7	10.7	204																	0.7744	9250.59			0.09	198.246			12.5027	12.5027
2019-12-29_17:00:00	2019-12-30 03:00:03	0	4.91	3.14	0.09	0	0	286.94	-0.4	-4.62	13.79	4.63728	4.94841	3.3	13.1	0.6	321.6	8.2	351																	0.0256	9852.55			0.4761	227.708			16.2997	16.2997
2019-12-29_18:00:00	2019-12-30 04:00:03	0	3.41	2.08	0.04	0	0	287.03	0.11	-4.56	13.88	4.56133	358.618	3.8	12	0.8	334.8	8	470																	2.9584	9964.03			3.5344	259.21			14.1476	14.1476
2019-12-29_19:00:00	2019-12-30 05:00:03	0	2.45	1.47	0.03	0	0	286.85	0.71	-4.34	13.7	4.39769	350.709	5	10.8	0.9	319.6	8.7	531																	12.4609	9846.59			8.41	305.55			12.2339	12.2339
2019-12-29_20:00:00	2019-12-30 06:00:03	0	2.15	1.31	0.02	0	0	290.08	0.93	-3.32	16.93	3.4478	344.351	6.2	11.5	0.8	311.3	10.2	432																	23.9121	9641.28			29.4849	183.602			7.01083	7.01083
2019-12-29_21:00:00	2019-12-30 07:00:03	0	2.3	1.43	0.03	0	0	294.47	0.81	-1.6	21.32	1.79335	333.149	7	15.9	0.3	265.3	12	524																	31.0249	9461.45			29.3764	29.3764			2.23009	7.32596
2019-12-29_22:00:00	2019-12-30 08:00:03	0	2.43	1.59	0.04	0	0	297.93	0.78	-0.45	24.78	0.9005	299.982	4.6	22.6	0.4	174.2	11.1	375																	9.0601	9902.24			4.7524	29.16			0.2505	12.2465
2019-12-29_23:00:00	2019-12-30 09:00:03	0	2.37	1.66	0.05	0	0	299.26	-0.22	0.36	26.11	0.4219	148.57	2.2	26.8	0.6	141.4	7.5	434																	0.2916	10371.4			0.4761	119.465			0.0317194	14.274
2019-12-30_00:00:00	2019-12-30 10:00:03	0	1.53	1.06	0.03	0	0	300.47	-1.06	0.03	27.32	1.06042	91.621	5.8	29.1	1.3	120.4	10	347																	22.4676	9769.35			3.1684	208.514			0.0573964	5.95153
2019-12-30_01:00:00	2019-12-30 11:00:03	0	0.88	0.6	0.02	0	0	301.46	-1.66	-0.4	28.31	1.70751	76.4522	2.3	30.3	0.9	60.1	9.4	139																	2.89	10567.8			3.9601	276.557			0.652077	4.807
2019-12-30_02:00:00	2019-12-30 12:00:03	0	0.7	0.5	0.02	0	0	302.24	-2.56	-1.01	29.09	2.75204	68.4694	4.1	31.4	1.4	116.2	10.3	149																	12.96	10221.2			5.3361	342.62			1.828	1.828
2019-12-30_03:00:00	2019-12-30 13:00:03	0	0.95	0.73	0.03	0	0	302.67	-3.22	-1.86	29.52	3.7186	59.9877	6	31.7	2.1	139.5	11.2	153																	27.7729	9795.06			4.7524	370.178			2.61987	2.61987
2019-12-30_04:00:00	2019-12-30 14:00:03	0	1.46	1.14	0.05	0	0	302.79	-3.34	-2.75	29.64	4.32644	50.5337	7.4	32.7	1.9	121.7	10.5	211																	39.1876	9440.07			9.3636	414.53			5.88762	5.88762
2019-12-30_05:00:00	2019-12-30 15:00:03	0	2.05	1.56	0.07	0	0	302.59	-3.16	-3.83	29.44	4.96533	39.525	5.2	33.2	0.6	117.9	7.1	218																	13.2496	9789.12			14.1376	426.836			19.0561	19.0561
2019-12-30_06:00:00	2019-12-30 16:00:03	0	3.41	2.32	0.1	0	0	301.52	-3.03	-5.45	28.37	6.23566	29.0726	6.8	33.6	1	81.3	8.7	262																	20.0704	9327.7			27.3529	399.6			27.4121	27.4121
2019-12-30_07:00:00	2019-12-30 17:00:03	0	4.72	3.15	0.13	0	0	299.92	-3.27	-6.13	26.77	6.94765	28.0774	11.6	32.7	2.3	120.8	13.8	535																	71.4025	8271.9			35.1649	305.9			21.6006	21.6006
2019-12-30_08:00:00	2019-12-30 18:00:03	0	7.4	5.19	0.23	0	0	297.69	-2.91	-6.4	24.54	7.03051	24.4508	14.7	32	2.1	66	17.2	355																	90.4401	7363.36			55.6516	211.994			24.3099	24.3099
2019-12-30_09:00:00	2019-12-30 19:00:03	0	13.46	9.97	0.5	0	0	294.47	-2.07	-5.74	21.32	6.10184	19.8308	9.4	29.3	1.9	39.5	13	199																	0.3249	7452.87			63.6804	74.6496			17.6555	17.6555
2019-12-30_10:00:00	2019-12-30 20:00:03	0	16	10.62	0.46	0	0	292.58	-2.2	-6.3	19.43	6.67308	19.2496	5.4	26.4	1.5	33.4	9.9	109																	27.2484	8042.5			48.5809	48.5809			26.7608	26.7608
2019-12-30_11:00:00	2019-12-30 21:00:03	0	16.33	10.41	0.41	0	0	291.17	-1.47	-5.91	18.02	6.09007	13.9679	5	24.4	0.8	56.2	9.7	114																	29.2681	8152.28			40.7044	40.7044			27.9849	27.9849
2019-12-30_12:00:00	2019-12-30 22:00:03	0	18.31	12.88	0.58	0	0	290.62	-0.9	-5.25	17.47	5.32658	9.72766	3.3	22.7	0.4	78.4	9																		91.7764	8013.83			27.3529	27.3529			24.2712	24.2712
2019-12-30_13:00:00	2019-12-30 23:00:03	0	19.4	14.98	0.74	0	0	290.49	-0.22	-5.02	17.34	5.02482	2.50944	6.8	21.4	0.6	136.7	14.3	63																	66.9124	7042.57			16.4836	16.4836			19.579	19.579
2019-12-30_14:00:00	2019-12-31 00:00:03	0	19.45	15.85	0.83	0	0	290.77	0.49	-4.59	17.62	4.61608	353.907	10.7	20.2	0.6	124.8	19	60																	26.5225	6264.72			6.6564	17.3056			16.1289	16.1289
2019-12-30_15:00:00	2019-12-31 01:00:03	0	16.82	13.73	0.71	0	0	290.15	0.73	-4.07	17	4.13495	349.832	16.3	19	0.1	26.3	24.4	102																	6.6049	5725.95			4	35.7604			16.2808	16.2808
2019-12-30_16:00:00	2019-12-31 02:00:03	0	12.22	9.82	0.49	0	0	289.66	0.95	-3.91	16.51	4.02375	346.344	19.3	18.1	0.2	79.9	26.4	147																	89.8704	5864.5			2.5281	54.3169			14.6211	14.6211
2019-12-30_17:00:00	2019-12-31 03:00:03	0	8.11	6.28	0.29	0	0	289.66	0.92	-4.29	16.51	4.38754	347.896	21.9	17	0.2	79.3	28.3	124																	243.984	6009.35			0.2401	71.7409			17.5355	17.5355
2019-12-30_18:00:00	2019-12-31 04:00:03	0	4.63	3.12	0.11	0	0	289.47	0.68	-4.67	16.32	4.71925	351.715	17.4	15.2	0.5	330.4	23.7	91																	203.918	7255.63			1.2544	109.412			17.8021	17.8021
2019-12-30_19:00:00	2019-12-31 05:00:03	0	3.65	2.19	0.05	0	0	289.05	0.23	-4.94	15.9	4.94535	357.334	18	13.7	1	328	23.7	107																	249.956	7311.96			4.84	153.264			15.5658	15.5658
2019-12-30_20:00:00	2019-12-31 06:00:03	0	3.58	2.15	0.05	0	0	291.51	0.12	-4.51	18.36	4.5116	358.476	12.7	13.4	0.9	306.3	18.9	116																	111.302	8253.72			24.6016	104.448			13.0436	13.0436
2019-12-30_21:00:00	2019-12-31 07:00:03	0	3.4	2.07	0.05	0	0	294.83	0.39	-3.99	21.68	4.00901	354.417	13.8	16.3	0.9	301	24.7	203																	137.593	8069.43			28.9444	28.9444			9.66597	9.66597
2019-12-30_22:00:00	2019-12-31 08:00:03	0	2.12	1.36	0.04	0	0	297.71	0.88	-2.86	24.56	2.99232	342.897	12.1	22.2	0.6	306.7	19.6	313																	115.348	8508.22			5.5696	22.8484			5.72321	5.72321
2019-12-30_23:00:00	2019-12-31 09:00:03	0	1.55	1.07	0.04	0	0	299.24	0.85	-1.77	26.09	1.96352	334.349	7.9	26.6	0.5	235.3	11.9	613																	46.6489	9356.69			0.2601	114.704			2.14188	5.45915
2019-12-31_00:00:00	2019-12-31 10:00:03	0	1.31	0.96	0.04	0	0	300.21	0.4	-1.61	27.06	1.65895	346.048	6.3	28.7	1	206.1	10.5	831																	28.5156	9690.43			2.6896	189.888			0.434209	4.58411
2019-12-31_01:00:00	2019-12-31 11:00:03	0	1.09	0.81	0.03	0	0	301.01	0.21	-1.78	27.86	1.79234	353.272	4	30.1	0.8	263.6	8.9	950																	10.1761	10178.8			5.0176	255.36			0.984748	4.87374
2019-12-31_02:00:00	2019-12-31 12:00:03	0	1.05	0.77	0.03	0	0	301.7	0.32	-2.09	28.55	2.11436	351.295	6.2	30.6	1.3	217.2	12.7	795																	29.4849	9747.61			4.2025	294.809			0.663175	1.92001
2019-12-31_03:00:00	2019-12-31 13:00:03	0	1.19	0.82	0.03	0	0	302.22	0.41	-2.42	29.07	2.45449	350.384	9.1	31.3	0.7	243.5	15.7	683																	68.5584	9173.81			4.9729	338.192			3.07822	3.07822
2019-12-31_04:00:00	2019-12-31 14:00:03	0	1.44	0.93	0.02	0	0	302.57	0.73	-2.68	29.42	2.77764	344.763	12.4	32.1	1.6	152.6	18.1	668																	131.561	8532.22			7.1824	381.812			1.38684	1.38684
2019-12-31_05:00:00	2019-12-31 15:00:03	0	1.72	1.03	0.02	0	0	302.67	1.25	-2.55	29.52	2.83989	333.886	14	33	1	299.6	19.3	721																	168.221	8221.05			12.1104	421.892			3.38521	3.38521
2019-12-31_06:00:00	2019-12-31 16:00:03	0	2.23	1.24	0.02	0	0	302.49	2.15	-2.08	29.34	2.99147	314.052	13.4	33	1.3	237.7	19.1	710																	147.866	8291.92			13.3956	414.53			2.86107	2.86107
2019-12-31_07:00:00	2019-12-31 17:00:03	0	2.99	1.62	0.02	0	0	301.89	2.88	-1.38	28.74	3.19356	295.602	13.2	33.1	1.8	234.4	20.1	342																	134.096	8259.17			19.0096	394.42			1.942	1.942
2019-12-31_08:00:00	2019-12-31 18:00:03	0	5.43	3.48	0.11	0	0	300.64	2.48	-1.6	27.49	2.95134	302.829	14.3	32.1	1	231	21.5	187																	117.072	7729.93			21.2521	310.112			3.80772	3.80772
2019-12-31_09:00:00	2019-12-31 19:00:03	0	16.2	12.58	0.64	0	0	296.4	0.42	-3.07	23.25	3.0986	352.21	18.3	30.6	1.4	265.1	25.9	144																	32.7184	5598.03			54.0225	140.897			2.88523	2.88523
2019-12-31_10:00:00	2019-12-31 20:00:03	0	29.66	23.78	1.29	0	0	295.02	-0.53	-4.84	21.87	4.86893	6.24931	25.5	28.1	1.9	41.4	36	117																	2.9584	3183.22			38.8129	63.8401			8.81456	8.81456
2019-12-31_11:00:00	2019-12-31 21:00:03	0	31.49	24.4	1.28	0	0	293.58	-0.68	-5.62	20.43	5.66099	6.89913	18.1	26	0.6	19.1	24.1	162																	39.69	3994.24			31.0249	31.0249			25.6136	25.6136
2019-12-31_12:00:00	2019-12-31 22:00:03	0	33.94	25.99	1.34	0	0	292.23	-0.51	-5.2	19.08	5.22495	5.60156	25.3	24.5	0.3	303	29.7	236																	0.4761	2960.45			29.3764	29.3764			24.2551	24.2551
2019-12-31_13:00:00	2019-12-31 23:00:03	0	33.64	26.53	1.4	0	0	291.63	0.4	-4.52	18.48	4.53766	354.943	32.6	23.1	0.5	289.5	37.5	267																	36.8449	2168.76			21.3444	21.3444			16.3027	16.3027
2019-12-31_14:00:00	2020-01-01 00:00:03	0	22.45	17.18	0.86	0	0	291.63	1.65	-4.02	18.48	4.34545	337.684	35.6	21.6	0.2	284.1	40.6	233																	339.296	2800.53			9.7344	9.7344			17.1847	17.1847
2019-12-31_15:00:00	2020-01-01 01:00:03	0	15.32	10.3	0.41	0	0	291.69	2.38	-4.01	18.54	4.6631	329.31	35.3	19.9	0.3	325.2	40.4	266																	625	3612.01			1.8496	12.5316			19.0366	19.0366
2019-12-31_16:00:00	2020-01-01 02:00:03	0	10.69	5.64	0.11	0	0	291.23	2.63	-3.9	18.08	4.70392	326.006	31.3	18.8	0.3	98.2	37.1	279																	658.436	4727.94			0.5184	26.01			19.3945	19.3945
2019-12-31_17:00:00	2020-01-01 03:00:03	0	9.35	4.48	0.04	0	0	290.93	2.71	-3.76	17.78	4.63484	324.218	30.5	17.8	0.5	100.8	35.9	367																	677.04	5001.32			0.0004	40.96			17.0969	17.0969
2019-12-31_18:00:00	2020-01-01 04:00:03	0	9.12	4.29	0.02	0	0	290.48	2.64	-3.75	17.33	4.58608	324.855	23.2	18.5	0.6	89.3	28.6	616																	357.588	6116.8			1.3689	37.8225			15.8888	15.8888
2019-12-31_19:00:00	2020-01-01 05:00:03	0	8.99	4.23	0.01	0	0	290	2.61	-3.67	16.85	4.50344	324.581	23.1	16.9	0.7	316.5	27.6	599																	356.077	6141.86			0.0025	67.7329			14.4662	14.4662
2019-12-31_20:00:00	2020-01-01 06:00:03	0	9.19	4.34	0.01	0	0	292.07	2.7	-3.13	18.92	4.13363	319.218	20.6	16.2	0.7	323.7	26.7	667																	264.388	6522.18			7.3984	47.0596			11.7898	11.7898
2019-12-31_21:00:00	2020-01-01 07:00:03	0	9.37	4.44	0.01	0	0	294.94	3.54	-2.28	21.79	4.2107	302.784	17.4	19	0.2	97.4	27.2	1168																	167.962	7032.5			7.7841	7.7841			16.0857	16.0857
2019-12-31_22:00:00	2020-01-01 08:00:03	0	9.47	4.54	0.01	0	0	297.02	3.87	-1.52	23.87	4.1578	291.443	14.8	23.9	2.9	292.9	23.9	1624																	105.268	7458.05			0.0009	33.5241			1.58206	5.09766
2019-12-31_23:00:00	2020-01-01 09:00:03	0	9.53	4.82	0.04	0	0	298.49	3.42	-0.8	25.34	3.51232	283.166	4.4	26.3	3.6	284.1	12.8	1613																	0.1764	9308.39			0.9216	93.3156			0.00768758	5.34683
2020-01-01_00:00:00	2020-01-01 10:00:03	0	10.4	5.89	0.11	0	0	299.67	2.97	-0.12	26.52	2.97242	272.314	6.3	27.9	3.5	275.5	15.3	1603																	0.1681	8744.12			1.9044	154.754			0.278337	2.797
														6.2	29.7	2.5	286.3	13.9	1640																	6.96525e+06	1.0874e+07			25068.5	121632			7509.29	17394.2
														10.5	31.1	2.1	236	19	1344
														21.5	32.3	1.4	257.3	31	1005
														28.5	33	1.9	199.2	39.4	1075
														28.7	33.3	1.3	181.5	41.3	968
															30.3	2.3	214.8		960
															26.3	0.8	8.8		329
															26	1.8	46.9		205
														20.2	25.1	1.8	26.2	25.3	227
														19.2	23.6	0.5	270.4	24.2	216
														17.6	23.2	1.5	122.8	22.5	389
														19.6	23.6	2.9	183.2	24.8	654
														17.6	20.2	2	169.2	26.9	720
														5.2	18.9	2.2	317.7	8.4	1113
														4.2	19.7	0.2	254.1	6.3	966
														6.9	19.4	1	129.6	8.4	993
														7	18.9	0.4	98.3	8.8	850
														5.9	17.4	0.6	323.7	7.5	648
														3.9	16.6	0.2	341.4	5.6	801
														6	17	0.4	117.9	8.6	812
														6	19.5	1.7	123.6	9.1	765
														12.5	22.9	2.2	131.7	15.6	548
														34.5	25.1	2	129.8	39.1	430
														40.8	27.7	1	142	45.6
														27.1	30.2	0.6	165.8	31.5
														19.5	31.5	1.3	133.4	25.8
														19	32.7	1.4	130.7	26.7
														17.7	34	1.5	246.6	27.5
														18.6	32.2	4	143.5	32.5
														85.4	28	3.6	118.3	103
														74.2	23.3	2.3	25.7	86.6
														15	24.6	1.3	48.1	20.2
														13.2	23.7	3.1	143.2	17.4
														10.6	21.8	1.4	67	15.9
														14.1	21.2	1.3	308	19.8
														18.9	21.1	1	307.4	23
														12.8	20.4	0.4	96.8	15.6
														13.6	20.1	1.1	120.7	16.5
														17.9	20.1	0.9	126	21.3
														28.3	20	1	113.9	31.5
														29.2	19.3	1.3	116.1	33.6
														29.9	18.7	1.1	111.8	36.2
														43	18	1.2	116.6	51.2
														48.2	17.9	0.3	293.8	57.4
														36.6	20	1.9	121.5	45
														20.3	21.8	2.1	129.6	28.5
														22.1	24	1.6	127.3	30
														23.2	26.6	0.8	134.9	30.7
														25.8	28.6	0.7	167	33.1
														24.1	30.3	0.6	50.9	31.2
														25.6	31.6	0.8	227	33.1
														24.4	32.6	1	321.8	33
														23.1	33.1	2	157	31.8
														19.8	34	2.4	207.7	30
														16.4	32.9	0.9	245.8	26.8
														17.3	31.5	2.5	180.5	28
														46.6	29.6	2.2	122.9	61.4
														57.6	27.5	1.2	108	69.4
														56.1	25.5	0.8	96.6	66.5
														49.8	24.6	1.7	123.9	60.7
														39.6	23.9	1.4	116.3	49
														33.3	22.7	0.7	98	41.5
														33.7	21.5	0.4	31.4	41.7
														31.8	20.3	0.1	90.6	39.1
														31.6	19.4	0.6	330.8	38.7
														30.3	18.6	0.9	329.9	37.1
														29.5	17.6	0.8	327.7	35.9
														32	17.4	1.2	314.5	38.2
														40.1	20.7	1.6	303.5	47.7
														53.3	25	3.3	302.8	63.1
														41.4	28	3.5	297.2	51.7
														25	29.8	3.7	280.7	36.1
														18.9	31.1	3.4	274.9	30.2
														16.8	32	2.4	271.9	28.6
														25.3	32.9	1.7	208.4	36.8
														26.1	33.9	0.7	156.6	38.6
														22	34.4	2.2	166.1	36.1
														16.5	34.7	2.5	179.8	30.1
														18.8	35.2	0.4	221.4	31.4
														19.1	34.8	0.8	162.4	31.2
														25.1	33.4	1.5	67.4	37.1
														41.6	30.8	1.1	57.1	54.2
														35.7	28.9	0.7	34.8	47.3
														28.3	27.2	0.5	97.8	39.2
														29.3	25.4	0.2	83.7	39.8
														26.5	23.5	0.1	78.1	37.2
														23.2	21.6	0.7	325.8	34.8
														23.6	20.1	1.5	309.5	36.7
														23.7	19.7	1	317.8	37.6
														24.2	18.9	1.2	321.3	37.3
														25	18.7	1.8	310.6	37.1
														31.1	22.4	2.8	293.5	42.6
														25.9	23.9	2.9	286.2	36.8
														13.2	25.7	3.3	297.7	23.9
														12.2	28	3.1	292.7	23.5
														25.6	30.1	2.6	270.4	36.9
														87.9	31	2.2	235.2	100.4
														56.9	32.7	1.6	199.9	69.4
														39.7	34.1	1.3	155.6	53.3
														37	35.1	1.4	129	51.6
														43.3	35.5	1.8	93.7	59.1
														59.1	34.6	3.8	115.1	78.2
														84.3	33	3.4	111.2	105.4
														99.9	29.6	5.2	127	122.4
														115.4	27.3	2.8	119.8	139.1
														107.5	24.7	3	119.3	128.3
														92.8	22	3.1	117.4	109.9
														95.5	20.3	4.1	119.5	111
														91.3	19.3	4.2	120.3	106.1
														51.4	18.6	4.7	120.5	59.5
														30	18.3	4	119	33.6
														17.6	18.2	3.5	117.4	19.5
														13.3	18.2	2.8	114.4	14.9
														13.4	17.9	3.2	118.4	15.3
														18.2	17.5	1.7	113.7	20.8
														20.2	17.2	1.2	95.3	23.5
														22.1	17.9	2.2	118.6	25.3
														26.1	19.5	2.9	119.4	29
														27.1	21.6	2.4	108.7	30.2
														31.3	23.9	2.1	110.1	35.6
														30.3	25.5	3.2	134.6	36.1
														30.5	27.7	1.5	162.2	37.6
														32.8	29.1	2.1	132.6	40.9
														34.2	30.6	1.7	146	44.4
														34.5	31.2	2.3	123.1	46.1
														31.6	31.3	2.3	118.4	44.4
														30	30.9	3	125.8	41.8
														42.7	30.1	2.4	111	54.9
														46.9	27.7	2.8	116.3	58.1
														43.3	24.8	2.2	111.6	57.8
														40.4	22.3	3.1	116.9	57.4
														36.9	20.8	2.3	114	51.2
														36.6	20.2	2.2	116.3	50.3
														35.6	20	2.7	118.2	49.5
														34.1	19.5	2.6	117.3	44.4
														20.7	19.1	2.6	120.2	24.1
														19	19	2.7	120.1	20.1
														18.5	19	2.4	120.8	19.8
														16.3	18.8	1.7	118.1	17.4
														14.1	18.4	1.4	120.4	8.6
														15.7	19.6	1.7	119	11
														15	22	1.5	71	18.3
														13.5	24.1	0.8	43.2	18.5
														18.9	26	0.5	187.1	25.9
														22.5	28.1	1.3	205.1	32.2
														23.1	29	2	152.5	32.9
														22.6	30.3	1.9	117.3	32.7
														24.6	30.5	4	131.7	34.6
														31.5	29.1	6.3	136.7	52.3
														22.3	25.6	3.3	153.1	91.4
														14.8	22	2.8	317.4	24.5
														23.9	22.4	1.4	350.1	30.3
														18.6	22.3	1.8	355.3	22.1
														13.9	21.8	0.5	313.4	15.9
														9.7	20.9	0.3	28.8	12.4
														10.3	19.9	0.3	293.7	13.7
														11.7	19.3	0.6	323.5	15.5
														14.3	18.8	0.9	333.9	17.8
														13.1	18.3	0.4	309.3	16
														12.3	17.4	0.5	318.7	15.1
														13.4	16.4	0.6	323.6	16
														12.9	15.4	0.7	317	15.3
														14.8	14.6	1	308.3	17.6
														13.1	15.2	0.7	286.3	16.3
														14.3	17.8	0.8	311.9	18.9
														13.7	22.5	1.2	297.8	18.7
														14.5	26	2.2	260.5	19.3
														10.9	26.9	2.6	271.8	14.5
														12.9	27.4	1.6	283	16.3
														15.7	28.7	1.2	231.2	20.1
														16.7	30.2	1.7	179.2	22.9
														20.3	30.7	1.1	177.4	28.3
														19.4	31.1	0.1	347.6	29.2
														17.8	23.4	5	175.1	28.8
														21	20.5	0.5	328.2	29.1
														20.3	21.9	0.2	30.5	25.6
														15.1	23	0.9	105.5	19.3
														17.9	22.8	0.5	121.2	22.5
														22.3	21.8	0.9	127.3	26.4
														29.1	21.3	0.9	108.8	32.5
														25.8	21.6	1.8	136.7	29
														23.2	19.8	0.7	337.5	29
														27.4	19.8	0.2	62.6	33.5
														29.1	19.6	0.4	119.8	34.3
														25.6	19.3	0.4	83.5	29.6
														25.9	18.7	0.6	102.5	30.3
														23.5	18	1	120.9	28.6
														22	18	0.9	111.2	28.8
														27.4	18.5	0.9	130.3	35.1
															18.7	0.3	153.1
															21.1	1.3	129.5
															24.3	0.4	310.4
															31.2	2.2	259.1
														22.1	31.1	1.7	275.4	33.1
														22.6	22.1	4.7	145.7	34.2
														18.3	19.4	2.2	103.2	27.4
														15.2	19.1	1.8	103.4	20.3
														10.4	17.7	2.4	341	14.3
														4.7	17.2	2.1	37.4	7.4
														7.1	18.2	0.8	94	9.3
														9.4	17.4	0.6	97.6	10.9
														10	17.2	0.4	280	12.6
														6.3	17.5	0.5	51.8	12.2
														12	17.7	0.2	23.4	14.8
														16.3	17	0.3	337.7	19.3
														14.3	16.4	0.1	32.3	17.4
														12.8	16.2	0.3	38.7	15.7
														9.8	16.1	0.5	105.1	12.7
														7.4	15.7	0.4	334.2	11.2
														10.6	15.7	0.1	333	14.5
														17	17.6	0.5	149.1	20.5
														14	21.5	0.3	151.4	16.7
														10	25.1	0.8	265.5	14.4
														11.6	26.3	2.6	281.7	16
														9.2	27.5	3.2	290	13
														13.3	28.7	2.9	298.7	17.3
														14.7	29.7	3.9	291.7	18.5
														10.6	30.2	4.3	299	15.6
														10.9	30.7	4.3	299.2	17.3
														12	30.8	3.9	287.6	20.8
														20.4	31.1	3.8	298.4	32.1
														31.5	30.6	3.3	300.7	46.1
														20.8	29.4	2.6	303.7	36.6
														21.4	27.4	1.5	312.6	35
														18.3	25.1	0.9	296	30.6
														16.4	23.7	0.4	315.2	28.8
														16.1	22.9	0.2	135.7	26.3
														16.4	24	0.6	293.5	24.6
														14.7	25.1	0.9	300.5	23.3
														19.8	24	0.5	303	28.3
														18.4	24.1	1.4	289.1	28.3
														15.4	23.5	2.7	295.9	27
														14.9	22.8	2.5	299.4	26.5
														15.2	22.7	3.6	293.6	26.2
														16.9	23.1	3.8	293.9	28.1
														17.2	24.5	5.7	293	28.9
														15.8	25.2	4.6	277.6	28.9
														15.7	25.6	4.8	289.4	28.7
														18.2	25.6	3.6	279.6	34
														20.1	27.3	3.4	260	59.8
														24.7	27.2	2.4	275.2	116.7
														27.9	24.9	1.4	292.9	146.5
														20.5	24.5	1.1	22.8	85.2
														17.6	26.4	0.6	24.9	67.5
														19.4	27	0.5	250	63.8
														20.2	26.2	0.2	183.5	62.3
														13.5	23.3	4.4	125.3	43.9
														31.4	20.1	3.4	118.3	55.7
														30.8	18.5	2.7	115.8	44.9
														14.3	17.7	3.3	120	20.1
														8.9	16.7	3.6	121	12.8
														4.8	16.2	4.2	121.7	7.2
														1.2	16.2	3.2	118.6	2.9
														1.7	16.3	2.8	115.7	2.6
														1.2	16.1	3.3	118.9	1.7
														2.1	16	2.9	116.7	2.3
														1.7	16.1	2.4	114.4	2
														1	16	1.7	106.1	1
														3.4	15.4	1.9	109.1	3.7
														7.1	15.6	2.2	113.8	8.9
														10.9	15.8	3.1	117.6	15.6
														6.7	15.6	2.4	111.6	8.6
														9.9	15.7	2.3	104.9	11.1
														17.8	16.1	2.9	112	21.2
														35.2	15.9	5.4	125.9	42.1
														51.9	16.2	4.1	119.9	59.6
														63.3	17.1	4.5	121	73.6
														60.8	16	4	116.6	71.3
														61.6	16	3.8	118.1	74.9
														40.5	15.7	3.8	118.1	55.2
														27.8	15.6	3.1	114.2	44
														15.7	15.4	3	114.5	31.1
														10.4	15.3	3.3	115.9	22
														6.7	14.6	3.7	117	13.1
														4	13.7	3	115.6	7.3
														6.5	13.6	2.9	114.7	12.1
														9.8	13.7	2.6	115	18.4
														11	13.5	2.4	114.8	20.2
														7.9	12.8	1.8	111.5	16.3
														5.5	12.9	1.9	112.2	13.6
														6.2	13.2	1.7	111.8	13.9
														5.9	13.4	2.8	117.5	13.7
														5.2	13.7	2.4	115.8	11.5
														9.4	14.7	2.8	118.7	14.4
														11.8	16.3	2.6	113.6	17.9
														14.8	17.9	3.2	117.2	21.1
														16	19.1	4.1	124.4	23.2
														16.3	20.4	3.8	123.7	24.5
														15.6	21.5	3.9	128.9	24.7
														17	22.7	3.5	136.8	27
														16.5	23.4	4	130.4	27.4
														18.4	23.5	4	139	29.5
														14.7	23.5	3.9	131.4	25.4
														17	23.1	3.3	121.6	26.2
														13	21.4	3.6	121.7	21.3
														13.1	19.6	1.9	115.7	21.4
														11.1	18.1	2.1	113.9	18.7
														10.5	16.7	2.2	111.5	17.3
														10.3	15.8	2.1	117.3	16.3
														6	14.9	1.6	121.3	12.5
														8.3	14.1	1.7	122.4	14.4
														5.6	13.2	1.4	121.6	11.6
														4.7	12.8	1.4	120.8	10.7
														6.3	12.2	0.8	115.4	12.4
														2.2	11.3	0.9	120.9	7.4
														2.5	11.3	1.2	122	7.6
														3	13.4	2.2	120.4	9.4
														5.8	15.6	3.5	120.7	12.7
														9.5	17.9	3.4	118.5	15.2
														5.6	20.2	3.9	121.6	10.2
														4.9	21.4	3.8	127.9	16.2
														8.8	22.6	3.1	136.5	14.7
														8.8	23.7	3.9	136.7	12.4
														8.1	24.2	5	139.5	11.5
														9.2	24.3	4.6	125.7	12.6
														9.9	24.6	3.5	120.2	13.8
														4.1	24.6	3.3	121.2	8.3
														4.4	24.7	2.7	110	8.8
														9.2	22.5	2.5	109.7	14.7
														8.5	20.8	1.7	107.1	14.2
														8.7	19.3	2	114.4	14.1
														9.6	18.3	2.3	120.2	14.7
														5.1	17.9	2.3	119.6	9.8
														6.8	17.7	1.9	119.6	11.2
														4.5	17.6	2.4	117.4	9
														5.2	17.4	2	119.7	10
														3.5	17.2	2	119.9	7.9
														7.1	16.6	1.9	122.7	10.9
														3.4	16.5	2	122.3	6.2
														6.1	16.4	1.9	120.9	9.2
														5.9	17.6	2.6	124.8	9.9
														3.8	20	1.1	76.3	7.1
														1.8	21.6	1.3	44.1	3.5
														1.5	23.4	1.6	54.9	2.8
														3.9	24.3	1.9	69.6	5.7
														4	25.6	1.7	58	5.2
														4.2	19.9	2.4	295.2	6.6
														4	18.9	0.9	135.7	6.7
														5.9	19.9	1.9	122.7	7.4
														4.5	20.3	1.4	146.7	6.4
														3.6	19.8	2.3	143.1	5.2
														3.7	19.3	1.9	118.4	5.2
														4	18.9	1.9	118.8	5
														3.1	18.4	0.4	86.8	3.7
														0.3	18.1	0.6	134.2	1.6
														2.4	18.2	1	48.5	3.6
														1.4	18.6	1.6	33.1	2.3
														0.5	18.4	0.3	8.4	1.1
														1.5	18	0.3	117.8	2
														1.9	17.6	0.4	134	3
														0.5	17.7	0.5	65.7	2.2
														3.8	17.9	0.3	48.2	5.8
														3.1	17.5	0.6	88.3	5
														4.1	17.3	0.1	71.2	6.4
														5	16.9	0.2	265.3	7.7
														5.6	17.7	0.5	267.4	7.9
														6.6	20	0.4	196.2	9.1
														9.3	21.6	2.1	310.6	11.6
														5.9	22.7	3	304.5	9
														7.5	23.7	2.3	290.8	10.5
														7.6	23.6	0.5	155	10.2
														13.3	20.3	1	57.8	15.9
														12.3	18.6	1.8	176.7	15.2
														5.7	16.7	3.7	187.5	7
														4.8	16.4	2	231	5.6
														4.4	16.1	1.9	306.3	5.3
														2.5	15.8	0.4	36.4	3.6
														1.5	15.7	1	91.6	2.3
														3	15.8	1	110.1	3.7
														3.9	15.6	0.4	90.7	4.9
														5.2	15.5	0.3	108.5	6.5
														1.7	15.7	0.2	69.3	3.5
														5.1	15.7	0.5	90.3	7
														6.4	15.8	0.4	86.7	7.9
														9.3	15.7	0.3	51.5	10.9
														8.2	15.3	0.4	85.3	10
														4.1	14.7	0.4	345	6.6
														9.5	14.4	0.6	337.7	12.1
														6.5	15.3	0.1	153	8.8
														5.9	17.1	0.4	113.1	8.8
														3.8	19.5	0.6	160.8	6.1
														4.4	21	1.3	253.7	6.1
														3.7	21.3	1.7	243.3	5.4
														4.4	18.8	1	297.3	6.4
														8.9	18.8	0.4	355.4	10.4
														3	19	0.9	58.2	4.4
														1	17.1	1.1	263.2	3
														3.5	16.7	0.9	132.3	4.6
														0.5	17.2	1.1	121.1	1.3
														2.5	17.3	0.7	95.5	3.5
														3.6	17.1	0.9	116	4.7
														2.7	16.6	1.4	118.9	3.4
														2.8	16.5	2.2	124.2	3.4
														-0.5	16.5	1.9	122.4	0.5
														-0.2	16.6	2.7	126	0.5
														0.2	16.3	2.2	125.3	0.4
														-1.6	16.1	2	128.8	-1.3
														0.3	16.1	0.9	112	0.8
														-0.2	16.2	1.2	118	0.4
														1	16.3	1.6	122.7	1.9
														-0.1	16.3	2.3	122.7	1.5
														2.8	16.1	2.7	123.4	4.2
														0.9	15.5	1.8	120.1	2
														4.4	15.7	1.7	118.8	6
														3.7	16.4	3.2	122.3	5.4
														1.5	16.7	4	123.9	2.1
														2.8	17	4	122.7	3.6
														1.8	16.7	3.8	122.5	2.7
														1.4	16.7	2.8	118.6	2.6
														2.5	16.9	3.5	121.7	3.3
														4	17.1	2.9	120.1	4.8
														0.3	18.5	4	122.4	1.3
														1	18.6	3.7	124.6	2.4
														1.7	17.8	3.2	122.4	2.8
														3.8	17.6	2.8	121	4.8
														2.1	17	2.3	119.4	3
														0.3	16.8	2.8	120	1.2
														3.9	16.6	2.5	120	5.3
														1.4	16.5	2	119.1	3.3
														3.7	16.4	1.3	110.1	6.3
														0.4	16.2	1.5	124	2.9
														1.1	16.3	1.4	120.2	2.4
														1.8	16.3	2.5	123.8	2.6
														0.4	16.1	2.7	120.6	1
														1.2	16	2	120.8	1.8
														-0.4	16.1	1.7	118.4	0.1
														-1.4	16.4	1.6	122.2	-0.9
														1	17.4	1.4	118.3	1
														0.9	18.6	1.3	101.9	1.3
														4.8	20.6	1	134.4	4.9
														2	21.8	0.5	197.3	2.5
														3.5	20.8	0.7	304	4.6
														1.6	21.6	1.3	108	3.8
														1.8	23.7	2.2	270.6	3.7
														1.1	25.4	2.6	268.9	2.8
														3.5	23.9	1.2	141.3	4.8
														4.6	22.7	2.1	111.1	5.5
														3.2	21.4	0.8	119.6	4.2
														1	21.5	0.9	111.2	2.8
														2.6	20.2	1.3	120.4	4
														1.5	18.8	0.7	103.5	3.2
														1.6	18.6	0.9	120.7	3.4
														3.4	18.2	0.3	112.9	5.4
														1.4	17.8	0.4	122	3.8
														2.7	17.5	0.6	123.9	4.7
														-0.3	16.9	0.3	127.8	2.4
														-0.2	16.7	0.1	283.6	2.7
														2.6	16.9	0	334.8	5.9
														4.1	17.1	0.2	39.9	7.4
														8.5	17.4	0.4	114.8	12.5
														10.1	17.9	0.3	335.2	15.1
														10.8	20.7	1.2	322.5	17.3
														7.7	24	3.4	318	12.1
														5.4	26	2.8	330.1	10.7
														9	27.2	4.2	317.1	15.8
														8.8	28.2	4.3	321.6	16.1
														10.6	27.7	4	322.2	19.1
														9.3	28.6	3.8	325.1	17.8
														9.1	28.6	3.8	326.8	17.8
														10.5	27.7	4	313.6	19.6
														8.4	27	3.1	322.2	16.3
														7.1	27.6	1.9	350	14.1
														5.4	24	1.9	343.7	13.7
														3.8	22.9	0.6	276.6	13.6
														7.7	24	2.2	311.3	35.8
														11.3	22.6	0.6	294.5	55.6
														10.7	21.7	0.8	282	49.9
														11.8	20.5	0.5	291.7	52.9
														8.3	19.3	0.5	325.2	47
														9.8	17.7	0.5	318.3	38.7
														10.1	16.6	0.6	324.5	39.3
														12.8	15.9	0.6	337.9	49.4
														15.4	15.2	0.6	327.2	67.4
														13.1	14.7	0.4	330.4	77.6
														15.7	17	0.8	309.7	79.2
														18.8	21.5	2.9	307.2	80
														12.5	23.5	3.9	305.3	69
														14.2	24.9	5.1	301.2	75.8
														8.1	26	5.9	304.2	62.6
														7.8	26.8	5.4	307.1	53.9
														12.6	27.8	5.8	304.7	53.8
														11.4	28.2	6.5	306.7	43.4
														10.4	28.7	5.5	307.2	34.4
														6	29	5	311.1	29
														1.1	28.8	4	308.9	22.4
														6.1	28.2	3.3	308.8	27.2
														5	26.3	1.9	302.4	23.1
														2.6	22.1	0.7	324.8	18.8
														7.2	19.2	1	327.1	22.8
														8.4	16.9	0.9	317.5	23.4
														6.3	15.5	0.8	331.8	21.8
														7	14.2	0.8	326.3	21
														3.9	12.8	0.9	322.5	15
														1.6	12.2	1	328.4	10.5
														4.1	11.4	0.9	330.7	12.1
														5	10.6	0.7	328.7	12.3
														4.2	10.4	0.9	337.5	11.2
														5.4	10.4	0.9	321.6	13.2
														7	13.4	0.9	318.4	17.1
														7.1	19	0.3	259.8	18.4
														9.6	24.4	1	295.4	23.4
														6.7	26.3	2.4	292.1	23.7
														6.7	27.7	2.1	281	23.4
														4.4	29.2	3.3	295.7	22.8
														9.4	29.8	5.6	290.7	32.5
														9.4	30.7	5	286.2	33.6
														8.5	31.2	4.6	290.1	32.3
														11.2	31.3	4.6	296.6	36.7
														10.9	31.4	3.9	292.4	36.2
														9.2	31.1	3	300.5	34.2
														8.5	29.8	1.4	304	31.3
														10.8	27	0.5	323.9	33.6
														12	24.4	0.3	350.4	31.4
														11.7	25.3	1.1	20.6	30.8
														10.6	24.6	1.7	4.7	26.5
														11.5	23.3	1.3	346.1	20.9
														9.7	23.1	0.6	283.2	18.7
														8.9	22.7	1.4	283.6	16.2
														8.3	22	1.5	305.6	13.8
														4.5	23	2.8	310.9	9.5
														3.9	22.6	4	307.1	8.3
														5	22.4	4.1	304.6	9.3
														5.8	23	4.7	307.8	10.8
														5	24.3	4.4	316.8	11
														7.7	25.9	4.3	313.1	19.9
														9.4	27.4	4.5	311	16.9
														8.7	28.6	4.6	314.4	16.4
														9.8	29.1	5	311.4	19.1
														12.7	29.8	4.2	315.5	22.7
															29.8	4.3	312.6
															27.3	3.4	309.8
															24.3	1.6	306.3
														-2.6	23.9	1.1	311.4	0.7
														8.3	19.1	3.2	295.4	14
														3.6	19.2	0.1	213.4	7.6
														4.2	19.6	0.2	320.2	7.5
														6.1	20.2	0.2	145.6	10
														4.5	21.3	0.3	246.2	9.7
														1.8	21.1	0.2	347.5	7.1
														4.9	22.8	1.3	281.6	9.9
														5.5	22.7	1.7	322.2	9.8
														8.7	23	3.2	313.4	12.7
														5.5	23	1.7	325.5	10.8
														5.6	22.5	2.6	296.8	10.5
														7.6	22.2	1.8	301.4	12.9
														7.1	22	2.5	290.5	11.9
														5.8	21.9	3.3	302.9	9.6
														4.8	22.5	3.7	297.6	7.8
														2.7	23.3	4.5	304.2	5.4
														4	23.7	6	302.9	6.5
														4.9	24.2	5.4	294.7	7.2
														6.1	24.4	4.3	293.3	8.2
														4.1	24.5	3.6	294.1	5.7
														2.1	25.3	2.5	295.4	3.7
														0.2	27.1	2.8	284.8	2
														1.9	27.6	3.1	303.8	3.4
														2.3	27.3	2.6	302.7	3.8
														4.9	26.3	2.3	298.2	7
														4.5	25.6	1.2	304.4	7.1
														4.3	24	1.4	302.9	8.5
														2.3	23.7	1.4	161.1	6.2
														2.1	23.1	2.8	135.5	5.2
														6.8	20.8	1.1	121.5	10.7
														5.8	19.8	0.3	323.7	7.8
														5.3	19.1	0.3	310.9	7.8
														7	18.5	0.7	329.5	10.2
														7.6	17.9	0.5	316.8	10.7
														6.2	17.9	0.9	113.3	9.4
														8.6	17.6	0.4	78.8	11.6
														9.1	17.2	0.1	118.4	11.9
														12.2	18.7	0.5	283.1	15.1
														7.4	21.9	0.6	104.4	9.7
														8.8	23.5	2	132.1	11
														8.8	25.5	1.4	126.1	12
														8.2	26.7	2.3	132.3	12.3
														6.1	27.8	2.1	118.3	10.3
														5.5	28.6	2.2	119.4	11.1
														5.2	29.1	3.1	125.1	14.4
														8.6	27.2	2.7	95.3	17.2
														5.5	19.4	2.4	324.1	12.7
														-0.1	19.8	0.9	98.6	4.3
														6.9	19.9	1.1	108.7	10.1
														8.6	19.5	0.4	163.8	11.2
														4.9	19.5	0.5	160.8	7.9
														5.3	19.4	0.2	108.6	8.5
														6.4	19.4	0.4	349.4	9.9
														4.1	19.2	0.6	76.9	7.5
														0.3	18.8	0.5	116.5	4
														0.5	18.5	0.4	81.8	4.3
														6.7	18.4	0.5	96.4	10
														4.4	18.2	0.4	355.6	7.9
														6	17.9	0.5	96.6	9.3
														4.3	17.7	0.7	308.5	8.6
														5.8	17.5	0.2	359	10.2
														10.7	18.7	0.1	274.5	14.6
														9.4	21.4	0.8	315.4	12.8
														2.6	23.7	1.7	291.7	5.7
														4	24.4	2.5	266.1	6.9
														6	24.9	2.5	265.9	8.6
														6.3	26	2.5	260.4	8.8
														1	27.3	2	248.8	3.9
														3.3	27.6	2.5	248.3	5.9
														7.5	24.7	3	229	10.6
														3.8	23.7	1.2	33.2	6.4
														2.1	20.1	1	99	8.4
														3.3	20.1	1	107.6	6.7
														6.1	19	1.6	108.2	7.8
														5.6	18.3	0.8	314.3	7.1
														4.1	18.5	0.8	127.6	5.6
														3.1	18.4	0.8	89	4.4
														-0.5	18.5	0.9	62.5	1.3
														1.6	18.6	0.6	135.3	3.7
														4.7	18.5	0.7	92.8	7.3
														3.5	18.5	0.9	99.1	6.6
														3.2	18.7	0.7	104.6	6.4
														7.6	18.5	0.4	352.4	11.3
														7	18.5	0.7	328.5	11.7
														5.7	18.3	1	310.1	7.7
														5.9	18.6	0.4	313.6	6.7
														7.3	20.9	1.9	294.2	9.3
														6.8	22.5	2.6	278.7	11.2
														7.6	23.1	2.3	264.3	12
														7.6	24.1	2.4	280.7	12.1
														7.2	25.1	2	252	11.4
														4	26.4	1.7	256.1	8.9
														4.1	22.4	1.7	139.3	8.1
														5.4	19.7	1.4	317.7	9.8
														4.1	22.1	0.6	324.7	7.3
														5.6	23.5	0.8	119.8	8.2
														6.7	24.6	1.1	26.5	10.1
														7.4	23.6	0.9	32.7	10.5
														4.9	22.1	0.6	61.4	7.6
														3.5	21	0.7	101.5	6.7
														3.1	20.1	0.6	107.6	7.2
														2.7	19.6	0.6	118.1	7.4
														1.7	18.8	0.3	101.5	6.7
														1.3	18.6	0.3	217	6.7
														2.8	17.9	0	353	8.2
														3.3	17.3	0.6	336	8.7
														4.5	16.6	0.6	325.2	9.9
														4.5	16.3	0.8	322.6	10
														6.1	16	0.7	304.3	11.4
														11.3	18.2	1.1	311.7	17
														9.6	20.7	2.8	294.9	14.7
														4.4	22.6	3	288.7	10.2
														8.4	23.6	2.7	257	14
														5.9	24.3	2.1	266.5	12.3
														2.4	25.7	1.8	261.2	9.6
														5.9	27.1	2.6	221.3	13
														5.8	28.4	2.2	215	11.7
														4.5	29.2	1.9	232.5	10.2
														4.8	29.9	1.6	252.6	9.7
														6.7	30.1	1.9	272.7	11.1
														6.2	29.2	1.5	241.5	11.1
														5.2	28.4	1.3	193	11.1
														7.9	25.6	1.8	123.3	14.2
														8.3	23.9	0.7	108.3	13.9
														8.2	23.1	0.7	84.2	12.1
														10	21.8	0.2	9	13
														7.2	21	0.5	329.5	10.5
														6.1	20.4	0.7	327.4	9.5
														8.8	19.9	0.7	324.6	12.9
														8.1	20.1	0.4	355	12.4
														10.3	20.2	0.1	354.2	14.7
														11.2	20.7	0.7	288.4	15.5
														9.2	20.9	1.2	293.4	13.8
														8.5	21.4	1.9	292.5	14
														5.1	23	3.3	295.9	11.5
														5.8	24.5	3	290.5	11.4
														7.2	26.2	2.5	282.1	12.2
														8.6	27.3	1.9	265.8	13.9
														8	28.1	2.7	265.4	14.2
														7.8	29.4	2.4	265.4	15.5
														6.4	30.6	2.1	261.1	15.8
														6.9	30.6	2.3	289	17.5
														7.1	31.9	2.7	234.3	18.4
														8.4	31.3	3.5	187.1	20.7
														9	28.7	2.8	133.5	23.2
														9.9	25	2.5	112.1	17.3
														13.2	23.2	2.5	113.1	19.9
														16.9	22.4	2.8	117.3	23.8
														15.3	21.7	2.5	115.8	22.5
														12.1	20.8	2.1	119.4	17.8
														9.5	20.4	2	121.9	16
														7.3	20.4	1.7	117.8	12.9
														5.1	20.3	1.8	117.4	10.4
														8	19.9	1.6	121.8	11.2
														6.6	19.8	1.8	122.9	10.2
														7.3	19.5	1.5	117.9	11.8
														7.6	19.4	1.3	119.1	13.2
														12.6	19.7	1.7	120.3	18.8
														15.1	20.8	2.5	127.8	20.7
														13.3	23	2.2	137	18.7
														12.6	25.9	0.2	163.7	19
														12.5	27.7	1.5	252.2	22.2
														11	29.1	2.2	265.2	25.1
														8.2	30.1	2.2	268.8	18.7
														5.3	30.5	1.3	274.2	13.2
														10.7	31.6	2	258.7	18.8
														10.3	32.1	2.1	256	19.9
														7.3	31.6	3.2	152.8	18.3
														7.6	28.6	3.4	118.5	18.9
														11.7	26.3	2.4	114.8	21.6
														14.1	24.6	1.8	118.7	23.3
														12.6	23.5	1.6	122.7	21
														9.4	22.7	2	122.9	17.3
														9.5	22	1.5	119.9	17.5
														5.9	21.1	1.5	124.5	14.4
														8.4	20.5	1	123.5	16.8
														9.2	20.3	0.6	93.5	17.6
														8.9	19.5	0.5	338	16.9
														10.6	19	0.2	48.8	17.7
														10.8	18.6	0.3	20.1	17.7
														8.9	18.2	0.3	333.8	15.7
														14	19.3	0.5	124.2	21.4
														14.1	22	0.9	297.1	21.6
														14.6	24.5	2.3	279.7	23.1
														13.5	26.2	3	275.2	21.4
														10.6	27.4	2.4	262.9	18.2
														10.4	28.4	2.7	271.1	18.1
														10.5	29.7	1.9	245.3	18.8
														6.1	30.8	2	255.2	15.9
														12	31.4	2.5	221.2	21.3
														12.5	31.7	2.2	172.1	22.7
														12.8	31.7	2.1	146.3	23
														13.7	30.4	1.9	113.4	24.2
														13.5	29.1	1.9	112.7	22.9
														11.2	27.1	1.5	73.2	19.4
														9.3	25	1	91.3	15.6
														4.1	23.4	1.6	119.2	10.3
														4.2	22.2	1.1	127.7	10.2
														4.3	21.6	0.8	122.6	10.4
