# Supplementary material for: Black Carbon Emission, Transport and Effect on Radiation Forcing Modelling During the Summer 2019–2020 Wildfires in Southeast Australia
Source: Preprints.org preprint supplement (doi:10.20944/preprints202302.0293.v1), 2023-02-17
Supplement: Supplementary file 8 [file dec_2019_1650.xlsx]

## Sheet: dec_2019_1650
Date_time	Datetime (AEST)	dust_1	PM10	PM2.5	BC	NO2	NO	Temp2m	U	V	Temp2m(C)	Wsp(pred)	Wdr(pred)	PM2.5 (obs)	Temperature(obs)	Wsp(obs)	Wdr(obs)	PM10 (obs)	BC_obs (nanograms)		Date	PM2.5_avg	PM2.5_avg_obs	BC_avg_obs_toan	BC_avg_pred_toan	BC_avg_predic_toan (microgams/m3)	BC_avg_obs (micrograms/m3)		PM25_cor	PM25_IOA	PM25(P-O)^2	(P-O)+(O-O)^2	PM25_Obs_avg		PM25(P-O)^2	(P-O)+(O-O)^2	PM25_Obs_avg		Temp(P-O)^2	(P-O)+(O-O)^2	Temp_Obs_avg		Wsp(P-O)^2	(P-O)+(O-O)^2	Wsp_Obs_avg
2019-12-01_00:00:00	2019-12-01 10:00:00	0	0	0	0	0	0	292.6	7.15	-1.3	19.45	7.26722	280.305						347		2019-12-01			110.333	0	0	0.110333		#DIV/0!	0.798982	1918440000	1918440000	#DIV/0!		0	4467.59	#DIV/0!		378.303	632.02	#DIV/0!		52.8125	52.8125	#DIV/0!
2019-12-01_01:00:00	2019-12-01 11:00:00	0	0	0	0	0	0	291.45	8.64	-1.09	18.3	8.70848	277.19						317		2019-12-02			80.6522	0	0	0.0806522		#DIV/0!	0	1918527601	1918527601			0	4467.59			334.89	691.164			75.8377	75.8377
2019-12-01_02:00:00	2019-12-01 12:00:00	0	0	0	0	0	0	290.2	9.16	0.84	17.05	9.19843	264.76						287		2019-12-03			106.083	0	0	0.106083				1918615204	1918615204			0	4467.59			290.703	758.452			84.6112	84.6112
2019-12-01_03:00:00	2019-12-01 13:00:00	0	0	0	0	0	0	287.99	8.35	1.98	14.84	8.58154	256.66						163		2019-12-04			159	0	0	0.159		Temp_cor	Temp_IOA	1918702809	1918702809			0	4467.59			220.226	885.062			73.6429	73.6429
2019-12-01_04:00:00	2019-12-01 14:00:00	0	0	0	0	0	0	287.14	7.26	-2.5	13.99	7.67839	289.001						184		2019-12-05			376.05	0	0	0.37605		#DIV/0!	0.186723	1918790416	1918790416			0	4467.59			195.72	936.36			58.9576	58.9576
2019-12-01_05:00:00	2019-12-01 15:00:00	0	0	0	0	0	0	287.32	6.83	-3.08	14.17	7.49235	294.273						246		2019-12-06			201.917	0.322497	0.000322497	0.201917				1918878025	1918878025			0	4467.59			200.789	925.376			56.1353	56.1353
2019-12-01_06:00:00	2019-12-01 16:00:00	0	0	0	0	0	0	287.96	7.21	-0.95	14.81	7.27232	277.506						111		2019-12-07			184.042	245.743	0.245743	0.184042		Wsp_cor	Wsp_IOA	1918965636	1918965636			0	4467.59			219.336	886.848			52.8866	52.8866
2019-12-01_07:00:00	2019-12-01 17:00:00	0	0	0	0	0	0	285.53	5.95	-0.97	12.38	6.02855	279.259						50		2019-12-08			404.5	35.1522	0.0351522	0.4045		#DIV/0!	0.00750889	1919053249	1919053249			0	4467.59			153.264	1037.48			36.3434	36.3434
2019-12-01_08:00:00	2019-12-01 18:00:00	0	0	0	0	0	0	285.51	3.74	-2.65	12.36	4.58368	305.32						49		2019-12-09			2927.26	328.625	0.328625	2.92726				1919140864	1919140864			0	4467.59			152.77	1038.77			21.0101	21.0101
2019-12-01_09:00:00	2019-12-01 19:00:00	0	0	0	0	0	0	285.62	2.09	-3.75	12.47	4.29309	330.868						39		2019-12-10			1279.12	490.519	0.490519	1.27913		BC_cor		1919228481	1919228481			0	4467.59			155.501	1031.69			18.4306	18.4306
2019-12-01_10:00:00	2019-12-01 20:00:00	0	0	0	0	0	0	284.25	1.68	-3.29	11.1	3.69412	332.949						48		2019-12-11			401.458	299.923	0.299923	0.401458		0.778824		1919316100	1919316100			0	4467.59			123.21	1121.58			13.6465	13.6465
2019-12-01_11:00:00	2019-12-01 21:00:00	0	0	0	0	0	0	285.36	3.14	-4.21	12.21	5.25202	323.283						40		2019-12-12			385.75	59.017	0.059017	0.38575				1919403721	1919403721			0	4467.59			149.084	1048.46			27.5837	27.5837
2019-12-01_12:00:00	2019-12-01 22:00:00	0	0	0	0	0	0	284.17	6.72	-2.37	11.02	7.12568	289.427						33		2019-12-13			201.083	172.859	0.172859	0.201083				1919491344	1919491344			0	4467.59			121.44	1126.94			50.7753	50.7753
2019-12-01_13:00:00	2019-12-01 23:00:00	0	0	0	0	0	0	283.48	3.4	-0.84	10.33	3.50223	283.878						40		2019-12-14			140	0	0	0.14				1919578969	1919578969			0	4467.59			106.709	1173.75			12.2656	12.2656
2019-12-01_14:00:00	2019-12-02 00:00:00	0	0.03	0.01	0	0	0	283.31	-0.61	-4.21	10.16	4.25396	8.24447						81		2019-12-15			198.958	4.19247	0.00419247	0.198958				1919666596	1919666596			0.0001	4466.25			103.226	1185.42			18.0962	18.0962
2019-12-01_15:00:00	2019-12-02 01:00:00	0	0.08	0.02	0	0	0	283.51	2.43	-4.34	10.36	4.97398	330.755						102		2019-12-16			170.826	287.023	0.287023	0.170826				1919754225	1919754225			0.0004	4464.91			107.33	1171.69			24.7405	24.7405
2019-12-01_16:00:00	2019-12-02 02:00:00	0.01	0.15	0.03	0	0	0	282.99	4.29	-4.2	9.84	6.00367	314.393						93		2019-12-17			3271.33	653.38	0.65338	3.27133				1919841856	1919841856			0.0009	4463.58			96.8256	1207.56			36.0441	36.0441
2019-12-01_17:00:00	2019-12-02 03:00:00	0.08	0.93	0.16	0	0	0	282.45	5.13	-3.82	9.3	6.39604	306.673						67		2019-12-18			3316.88	946.207	0.946207	3.31688				1919929489	1919929489			0.0256	4446.22			86.49	1245.38			40.9093	40.9093
2019-12-01_18:00:00	2019-12-02 04:00:00	0.15	2.79	0.6	0	0	0	282.01	5.29	-1.9	8.86	5.62086	289.757						58		2019-12-19			1668.58	651.122	0.651122	1.66858				1920017124	1920017124			0.36	4387.74			78.4996	1276.63			31.5941	31.5941
2019-12-01_19:00:00	2019-12-02 05:00:00	0.06	7.1	1.98	0	0	0	281.2	5.88	-0.38	8.05	5.89227	273.698						84		2019-12-20			16929	1274.19	1.27419	16.929				1920104761	1920104761			3.9204	4206.82			64.8025	1335.17			34.7188	34.7188
2019-12-01_20:00:00	2019-12-02 06:00:00	0	12.35	3.55	0	0	0	282.02	7	0.08	8.87	7.00046	269.345						67		2019-12-21			3030.42	863.648	0.863648	3.03042				1920192400	1920192400			12.6025	4005.62			78.6769	1275.92			49.0064	49.0064
2019-12-01_21:00:00	2019-12-02 07:00:00	0	19.32	5.35	0	0	0	282.59	8.21	0.24	9.44	8.21351	268.326						75		2019-12-22			3783.07	845.911	0.845911	3.78307				1920280041	1920280041			28.6225	3781.02			89.1136	1235.52			67.4617	67.4617
2019-12-01_22:00:00	2019-12-02 08:00:00	0	33.82	10.38	0	0	0	284.09	9.34	2.09	10.94	9.57098	257.387						32		2019-12-23				864.293	0.864293					1920367684	1920367684			107.744	3187.73			119.684	1132.32			91.6037	91.6037
2019-12-01_23:00:00	2019-12-02 09:00:00	0	38.59	13.02	0	0	0	284.76	10.07	2.55	11.61	10.3878	255.79						35		2019-12-24				630.805	0.630805					1920455329	1920455329			169.52	2896.59			134.792	1087.68			107.907	107.907
2019-12-02_00:00:00	2019-12-02 10:00:00	0	39.61	13.29	0	0	0	285.73	10.48	2.73	12.58	10.8297	255.399						26		2019-12-25				325.077	0.325077					1920542976	1920542976			176.624	2867.6			158.256	1024.64			117.283	117.283
2019-12-02_01:00:00	2019-12-02 11:00:00	0	38.19	12.82	0	0	0	286.49	10.78	2.83	13.34	11.1453	255.29						43		2019-12-26				407.314	0.407314					1920630625	1920630625			164.352	2918.16			177.956	976.562			124.217	124.217
2019-12-02_02:00:00	2019-12-02 12:00:00	0	46.74	14.64	0	0	0	286.35	9.59	4.19	13.2	10.4654	246.399						50		2019-12-27				820.111	0.820111					1920718276	1920718276			214.33	2724.84			174.24	985.332			109.524	109.524
2019-12-02_03:00:00	2019-12-02 13:00:00	0	25.12	8.47	0	0	0	287.62	9.08	4.56	14.47	10.1607	243.334						50		2019-12-28				576.303	0.576303					1920805929	1920805929			71.7409	3407.06			209.381	907.214			103.24	103.24
2019-12-02_04:00:00	2019-12-02 14:00:00	0	27.28	9.62	0	0	0	288.79	9.35	5.25	15.64	10.7231	240.686						49		2019-12-29				267.673	0.267673					1920893584	1920893584			92.5444	3274.13			244.61	838.102			114.985	114.985
2019-12-02_05:00:00	2019-12-02 15:00:00	0	24.37	8.73	0	0	0	289.78	10.25	4.79	16.63	11.314	244.952						79		2019-12-30			177	275.735	0.275735	0.177				1920981241	1920981241			76.2129	3376.77			276.557	781.762			128.007	128.007
2019-12-02_06:00:00	2019-12-02 16:00:00	0	32.21	11.1	0	0	0	290.12	9.93	5.39	16.97	11.2985	241.507						50		2019-12-31			427.708	74.1744	0.0741744	0.427708				1921068900	1921068900			123.21	3106.95			287.981	762.864			127.657	127.657
2019-12-02_07:00:00	2019-12-02 17:00:00	0	34.94	11.9	0	0	0	290.11	9.71	5.57	16.96	11.1942	240.16						48		2020-01-01										1921156561	1921156561			141.61	3018.4			287.642	763.417			125.309	125.309
2019-12-02_08:00:00	2019-12-02 18:00:00	0	39.96	13.5	0	0	0	289.6	9.25	5.21	16.45	10.6163	240.61						49												61433540016	61433540016			182.25	2845.16			270.603	791.86			112.707	112.707
2019-12-02_09:00:00	2019-12-02 19:00:00	0	37.66	12.73	0	0	0	288.44	7.12	4.2	15.29	8.26646	239.464						83																162.053	2927.89			233.784	858.49			68.3344	68.3344
2019-12-02_10:00:00	2019-12-02 20:00:00	0	40.92	13.85	0	0	0	287.12	4.89	2.99	13.97	5.73168	238.556						51																191.822	2807.94			195.161	937.584			32.8522	32.8522
2019-12-02_11:00:00	2019-12-02 21:00:00	0	38.83	12.97	0	0	0	285.83	3.96	3.28	12.68	5.14198	230.366						72																168.221	2901.98			160.782	1018.25			26.44	26.44
2019-12-02_12:00:00	2019-12-02 22:00:00	0	43.55	14.26	0	0	0	284.77	3.85	1.54	11.62	4.14658	248.199																						203.348	2764.66			135.024	1087.02			17.1941	17.1941
2019-12-02_13:00:00	2019-12-02 23:00:00	0	45.63	15.13	0	0	0	283.9	3.99	0.76	10.75	4.06174	259.216						163																228.917	2673.92			115.562	1145.15			16.4977	16.4977
2019-12-02_14:00:00	2019-12-03 00:00:00	0	36.85	12.75	0	0	0	283.05	3.98	0.68	9.9	4.03767	260.304						172																162.562	2925.73			98.01	1203.4			16.3028	16.3028
2019-12-02_15:00:00	2019-12-03 01:00:00	0	34.36	11.77	0	0	0	282.41	4.13	0.89	9.26	4.22481	257.839						79																138.533	3032.7			85.7476	1248.21			17.849	17.849
2019-12-02_16:00:00	2019-12-03 02:00:00	0	35.43	11.97	0	0	0	281.49	3.72	1.27	8.34	3.93081	251.15						69																143.281	3010.72			69.5556	1314.06			15.4513	15.4513
2019-12-02_17:00:00	2019-12-03 03:00:00	0	37.8	12.45	0	0	0	280.38	3.09	0.99	7.23	3.24472	252.235						50																155.002	2958.27			52.2729	1395.77			10.5282	10.5282
2019-12-02_18:00:00	2019-12-03 04:00:00	0	36.96	12.28	0	0	0	279.62	2.99	0.7	6.47	3.07085	256.824						46																150.798	2976.79			41.8609	1453.13			9.4301	9.4301
2019-12-02_19:00:00	2019-12-03 05:00:00	0	35.28	12.03	0	0	0	279.18	3.1	0.5	6.03	3.14006	260.838						86																144.721	3004.14			36.3609	1486.87			9.86	9.86
2019-12-02_20:00:00	2019-12-03 06:00:00	0	34.64	12.11	0	0	0	282.02	3.59	1.11	8.87	3.75769	252.819						104																146.652	2995.37			78.6769	1275.92			14.1202	14.1202
2019-12-02_21:00:00	2019-12-03 07:00:00	0	34.76	12.29	0	0	0	284.02	5.71	2.06	10.87	6.07023	250.162						217																151.044	2975.7			118.157	1137.04			36.8477	36.8477
2019-12-02_22:00:00	2019-12-03 08:00:00	0	33.56	12.5	0	0	0	285.26	7.1	1.44	12.11	7.24456	258.535						144																156.25	2952.84			146.652	1054.95			52.4836	52.4836
2019-12-02_23:00:00	2019-12-03 09:00:00	0	41.09	17.13	0	0	0	286.46	7.17	1.72	13.31	7.37342	256.51						75																293.437	2471.08			177.156	978.438			54.3673	54.3673
2019-12-03_00:00:00	2019-12-03 10:00:00	0	40.3	17.35	0	0	0	288.01	7.52	1.25	14.86	7.62318	260.562						80																301.023	2449.26			220.82	883.873			58.1129	58.1129
2019-12-03_01:00:00	2019-12-03 11:00:00	0	33.15	14.43	0	0	0	289.61	7.75	1.18	16.46	7.83932	261.343						84																208.225	2746.81			270.932	791.297			61.4549	61.4549
2019-12-03_02:00:00	2019-12-03 12:00:00	0	27.01	12.03	0	0	0	291.23	7.86	1.11	18.08	7.93799	261.962						112																144.721	3004.14			326.886	702.78			63.0117	63.0117
2019-12-03_03:00:00	2019-12-03 13:00:00	0	23.88	10.62	0	0	0	292.89	8.27	1.26	19.74	8.36543	261.337						200																112.784	3160.69			389.668	617.522			69.9805	69.9805
2019-12-03_04:00:00	2019-12-03 14:00:00	0	23.04	10.17	0	0	0	294.15	8.85	1.29	21	8.94352	261.707						127																103.429	3211.49			441	556.488			79.9866	79.9866
2019-12-03_05:00:00	2019-12-03 15:00:00	0	26.46	11.34	0	0	0	295.15	9.24	1.01	22	9.29504	263.762						288																128.596	3080.25			484	510.308			86.3977	86.3977
2019-12-03_06:00:00	2019-12-03 16:00:00	0	24.94	10.58	0	0	0	295.97	9.59	0.97	22.82	9.63893	264.224						152																111.936	3165.19			520.752	520.752			92.909	92.909
2019-12-03_07:00:00	2019-12-03 17:00:00	0	21.37	9.22	0	0	0	296.37	9.92	1.31	23.22	10.0061	262.477						49																85.0084	3320.06			539.168	539.168			100.123	100.123
2019-12-03_08:00:00	2019-12-03 18:00:00	0	22.7	9.78	0	0	0	296.02	9.96	1.48	22.87	10.0694	261.548						179																95.6484	3255.84			523.037	523.037			101.392	101.392
2019-12-03_09:00:00	2019-12-03 19:00:00	0	24.11	10.43	0	0	0	294.91	7.87	1.14	21.76	7.95214	261.758						271																108.785	3182.09			473.498	521.209			63.2365	63.2365
2019-12-03_10:00:00	2019-12-03 20:00:00	0	25.59	10.92	0	0	0	293.25	5.77	0.86	20.1	5.83374	261.523						64																119.246	3127.05			404.01	599.76			34.0325	34.0325
2019-12-03_11:00:00	2019-12-03 21:00:00	0	22.01	9.3	0	0	0	291.82	4.99	0.8	18.67	5.05372	260.892						50																86.49	3310.85			348.569	671.846			25.5401	25.5401
2019-12-03_12:00:00	2019-12-03 22:00:00	0	21.03	8.65	0	0	0	290.88	5.44	0.88	17.73	5.51072	260.811						38																74.8225	3386.08			314.353	721.46			30.368	30.368
2019-12-03_13:00:00	2019-12-03 23:00:00	0	24.87	10.23	0	0	0	289.89	5.41	1.47	16.74	5.60616	254.799						61																104.653	3204.69			280.228	775.622			31.429	31.429
2019-12-03_14:00:00	2019-12-04 00:00:00	0	25.24	10.31	0	0	0	288.77	5.34	1.83	15.62	5.64486	251.084						85																106.296	3195.64			243.984	839.261			31.8645	31.8645
2019-12-03_15:00:00	2019-12-04 01:00:00	0	26.6	10.62	0	0	0	287.2	4.21	2.63	14.05	4.96397	238.007						60																112.784	3160.69			197.403	932.692			24.641	24.641
2019-12-03_16:00:00	2019-12-04 02:00:00	0	30.42	12.06	0	0	0	285.73	3.7	2.59	12.58	4.51643	235.008						60																145.444	3000.85			158.256	1024.64			20.3981	20.3981
2019-12-03_17:00:00	2019-12-04 03:00:00	0	31.42	12.76	0	0	0	284.46	3.91	1.85	11.31	4.32558	244.679						59																162.818	2924.65			127.916	1107.56			18.7106	18.7106
2019-12-03_18:00:00	2019-12-04 04:00:00	0	27.93	11.83	0	0	0	283.3	3.91	1.78	10.15	4.2961	245.523						54																139.949	3026.1			103.023	1186.11			18.4565	18.4565
2019-12-03_19:00:00	2019-12-04 05:00:00	0	25.24	10.69	0	0	0	282.22	3.69	1.58	9.07	4.01404	246.82						64																114.276	3152.82			82.2649	1261.67			16.1125	16.1125
2019-12-03_20:00:00	2019-12-04 06:00:00	0	30.94	12.64	0	0	0	283.57	4.25	2.82	10.42	5.10048	236.435						165																159.77	2937.64			108.576	1167.59			26.0149	26.0149
2019-12-03_21:00:00	2019-12-04 07:00:00	0	44.67	17.93	0	0	0	285.13	4.61	3.46	11.98	5.764	233.11						125																321.485	2392.19			143.52	1063.41			33.2237	33.2237
2019-12-03_22:00:00	2019-12-04 08:00:00	0	41.78	16.94	0	0	0	286.36	5.22	2.47	13.21	5.77489	244.677						56																286.964	2490.01			174.504	984.704			33.3493	33.3493
2019-12-03_23:00:00	2019-12-04 09:00:00	0	32.53	13.98	0	0	0	287.72	5.58	2.72	14.57	6.20764	244.013						63																195.44	2794.18			212.285	901.2			38.5348	38.5348
2019-12-04_00:00:00	2019-12-04 10:00:00	0	32.43	14.27	0	0	0	289	5.76	2.89	15.85	6.44435	243.355						55																203.633	2763.6			251.223	825.988			41.5297	41.5297
2019-12-04_01:00:00	2019-12-04 11:00:00	0	29.64	13.36	0	0	0	290.38	6.16	2.64	17.23	6.70188	246.801						57																178.49	2860.11			296.873	748.57			44.9152	44.9152
2019-12-04_02:00:00	2019-12-04 12:00:00	0	26.13	11.64	0	0	0	291.85	6.61	1.93	18.7	6.886	253.723						53																135.49	3047.04			349.69	670.292			47.417	47.417
2019-12-04_03:00:00	2019-12-04 13:00:00	0	19.87	8.64	0	0	0	293.46	7.31	1.99	20.31	7.57603	254.771						61																74.6496	3387.24			412.496	589.518			57.3962	57.3962
2019-12-04_04:00:00	2019-12-04 14:00:00	0	17.12	7.82	0	0	0	294.51	7.46	2.2	21.36	7.77763	253.569						91																61.1524	3483.36			456.25	539.633			60.4916	60.4916
2019-12-04_05:00:00	2019-12-04 15:00:00	0	17.68	7.74	0	0	0	295.44	7.5	1.98	22.29	7.75696	255.211						150																59.9076	3492.81			496.844	497.29			60.1704	60.1704
2019-12-04_06:00:00	2019-12-04 16:00:00	0	17.33	7.42	0	0	0	295.99	7.54	1.78	22.84	7.74726	256.717						111																55.0564	3530.74			521.666	521.666			60.02	60.02
2019-12-04_07:00:00	2019-12-04 17:00:00	0	19.46	8.11	0	0	0	296.18	7.61	1.76	23.03	7.81087	256.978						98																65.7721	3449.21			530.381	530.381			61.0097	61.0097
2019-12-04_08:00:00	2019-12-04 18:00:00	0	20.68	8.66	0	0	0	295.87	7.36	1.71	22.72	7.55604	256.92						75																74.9956	3384.91			516.198	516.198			57.0937	57.0937
2019-12-04_09:00:00	2019-12-04 19:00:00	0	16.92	7.32	0	0	0	294.78	5.21	1.09	21.63	5.3228	258.183						56																53.5824	3542.63			467.857	527.162			28.3322	28.3322
2019-12-04_10:00:00	2019-12-04 20:00:00	0	12.33	5.47	0	0	0	292.47	3.59	0.22	19.32	3.59673	266.493						59																29.9209	3766.28			373.262	638.573			12.9365	12.9365
2019-12-04_11:00:00	2019-12-04 21:00:00	0	11.46	5.11	0	0	0	291.1	3.28	-0.5	17.95	3.31789	278.667						61																26.1121	3810.59			322.203	709.69			11.0084	11.0084
2019-12-04_12:00:00	2019-12-04 22:00:00	0	13.72	5.86	0	0	0	290.25	3.39	-0.92	17.1	3.51262	285.184						66																34.3396	3718.56			292.41	755.7			12.3385	12.3385
2019-12-04_13:00:00	2019-12-04 23:00:00	0	16.33	6.68	0	0	0	289.56	3.55	-1.1	16.41	3.71652	287.216						68																44.6224	3619.23			269.288	794.112			13.8125	13.8125
2019-12-04_14:00:00	2019-12-05 00:00:00	0	17.19	7.01	0	0	0	288.86	3.44	-1.68	15.71	3.82832	296.03						86																49.1401	3579.63			246.804	834.054			14.656	14.656
2019-12-04_15:00:00	2019-12-05 01:00:00	0	16.2	6.82	0	0	0	288.78	4.45	-1.04	15.63	4.56991	283.154						73																46.5124	3602.4			244.297	838.682			20.8841	20.8841
2019-12-04_16:00:00	2019-12-05 02:00:00	0	16.38	6.96	0	0	0	287.85	4.09	-0.31	14.7	4.10173	274.334						64																48.4416	3585.61			216.09	893.412			16.8242	16.8242
2019-12-04_17:00:00	2019-12-05 03:00:00	0	15.87	6.74	0	0	0	286.95	3.77	-0.59	13.8	3.81589	278.895						54																45.4276	3612.01			190.44	948.024			14.561	14.561
2019-12-04_18:00:00	2019-12-05 04:00:00	0	15.29	6.52	0	0	0	286.23	3.67	-0.86	13.08	3.76942	283.188						63																42.5104	3638.5			171.086	992.88			14.2085	14.2085
2019-12-04_19:00:00	2019-12-05 05:00:00	0	14.84	6.45	0	0	0	285.38	3.41	-1.08	12.23	3.57694	287.574						130																41.6025	3646.95			149.573	1047.17			12.7945	12.7945
2019-12-04_20:00:00	2019-12-05 06:00:00	0	14.5	6.46	0	0	0	288.17	3.27	-0.34	15.02	3.28763	275.936						342																41.7316	3645.74			225.6	874.385			10.8085	10.8085
2019-12-04_21:00:00	2019-12-05 07:00:00	0	14.04	6.4	0	0	0	290.38	3.59	0.32	17.23	3.60423	264.906						783																40.96	3652.99			296.873	748.57			12.9905	12.9905
2019-12-04_22:00:00	2019-12-05 08:00:00	0	12.86	5.97	0	0	0	292.02	4.38	-0.28	18.87	4.38894	273.658						670																35.6409	3705.16			356.077	661.518			19.2628	19.2628
2019-12-04_23:00:00	2019-12-05 09:00:00	0	9.94	4.68	0	0	0	293.88	5.64	-0.64	20.73	5.6762	276.474						490																21.9024	3863.87			429.733	569.3			32.2192	32.2192
2019-12-05_00:00:00	2019-12-05 10:00:00	0	6.27	3.09	0	0	0	295.59	6.93	-0.33	22.44	6.93785	272.726						287																9.5481	4064.06			503.554	503.554			48.1338	48.1338
2019-12-05_01:00:00	2019-12-05 11:00:00	0.01	2.55	1.41	0	0	0	296.94	8.1	-0.05	23.79	8.10015	270.354						416																1.9881	4281.08			565.964	565.964			65.6125	65.6125
2019-12-05_02:00:00	2019-12-05 12:00:00	0.01	2.47	1.34	0	0	0	298.06	8.51	-0.18	24.91	8.5119	271.212						481																1.7956	4290.25			620.508	620.508			72.4525	72.4525
2019-12-05_03:00:00	2019-12-05 13:00:00	0.02	1.73	0.96	0	0	0	299.11	8.83	0.12	25.96	8.83082	269.221						738																0.9216	4340.17			673.922	673.922			77.9833	77.9833
2019-12-05_04:00:00	2019-12-05 14:00:00	0.02	1.59	0.89	0	0	0	299.81	8.7	0.45	26.66	8.71163	267.039						1011																0.7921	4349.4			710.756	710.756			75.8925	75.8925
2019-12-05_05:00:00	2019-12-05 15:00:00	0.02	1.78	0.98	0	0	0	300.33	8.54	0.42	27.18	8.55032	267.184						1156																0.9604	4337.54			738.752	738.752			73.108	73.108
2019-12-05_06:00:00	2019-12-05 16:00:00	0.02	1.99	1.08	0	0	0	300.63	8.38	0.34	27.48	8.38689	267.677						1068																1.1664	4324.38			755.15	755.15			70.34	70.34
2019-12-05_07:00:00	2019-12-05 17:00:00	0.02	2.18	1.18	0	0	0	300.63	8.07	0.47	27.48	8.08367	266.667						234																1.3924	4311.24			755.15	755.15			65.3458	65.3458
2019-12-05_08:00:00	2019-12-05 18:00:00	0.02	2.26	1.24	0	0	0	300.19	7.73	0.72	27.04	7.76346	264.679						106																1.5376	4303.36			731.162	731.162			60.2713	60.2713
2019-12-05_09:00:00	2019-12-05 19:00:00	0.02	2.32	1.3	0	0	0	298.67	5.1	0.38	25.52	5.11414	265.739						93																1.69	4295.49			651.27	651.27			26.1544	26.1544
2019-12-05_10:00:00	2019-12-05 20:00:00	0.02	2.34	1.32	0	0	0	295.66	3.37	-0.41	22.51	3.39485	276.937						103																1.7424	4292.87			506.7	506.7			11.525	11.525
2019-12-05_11:00:00	2019-12-05 21:00:00	0.02	2.35	1.32	0	0	0	294.31	3.31	-1.12	21.16	3.49435	288.694						121																1.7424	4292.87			447.746	548.965			12.2105	12.2105
2019-12-05_12:00:00	2019-12-05 22:00:00	0.01	2.39	1.34	0	0	0	293.7	3.81	-1.33	20.55	4.03547	289.243						116																1.7956	4290.25			422.303	577.922			16.285	16.285
2019-12-05_13:00:00	2019-12-05 23:00:00	0.01	2.45	1.35	0	0	0	292.86	3.98	-1.26	19.71	4.17469	287.567						86																1.8225	4288.94			388.484	619.014			17.428	17.428
2019-12-05_14:00:00	2019-12-06 00:00:00	0	2.62	1.36	0	0	0	291.66	3.41	-1.72	18.51	3.81923	296.766						327																1.8496	4287.63			342.62	680.166			14.5865	14.5865
2019-12-05_15:00:00	2019-12-06 01:00:00	0	2.85	1.4	0	0	0	291.25	3.9	-1.8	18.1	4.29535	294.775																						1.96	4282.39			327.61	701.72			18.45	18.45
2019-12-05_16:00:00	2019-12-06 02:00:00	0	3.53	1.54	0	0	0	290.41	4.09	-1.44	17.26	4.33609	289.396																						2.3716	4264.09			297.908	746.929			18.8017	18.8017
2019-12-05_17:00:00	2019-12-06 03:00:00	0	4.77	1.95	0	0	0	289.16	3.72	-1.31	16.01	3.94392	289.4																						3.8025	4210.71			256.32	816.816			15.5545	15.5545
2019-12-05_18:00:00	2019-12-06 04:00:00	0	5.84	2.29	0	0	0	288.23	3.62	-1.43	15.08	3.89221	291.555																						5.2441	4166.7			227.406	870.84			15.1493	15.1493
2019-12-05_19:00:00	2019-12-06 05:00:00	0	7.22	2.7	0	0	0	287.34	3.48	-1.42	14.19	3.75856	292.198						68																7.29	4113.94			201.356	924.16			14.1268	14.1268
2019-12-05_20:00:00	2019-12-06 06:00:00	0	8.49	3.11	0	0	0	290	3.81	-0.78	16.85	3.88902	281.57						124																9.6721	4061.51			283.923	769.508			15.1245	15.1245
2019-12-05_21:00:00	2019-12-06 07:00:00	0	9.43	3.72	0	0	0	292.33	4.71	-0.52	19.18	4.73862	276.3						236																13.8384	3984.13			367.872	645.668			22.4545	22.4545
2019-12-05_22:00:00	2019-12-06 08:00:00	0	6.98	2.99	0	0	0	294.14	5.74	0.01	20.99	5.74001	269.9						322																8.9401	4076.82			440.58	556.96			32.9477	32.9477
2019-12-05_23:00:00	2019-12-06 09:00:00	0	5.55	2.39	0	0	0	295.75	6.24	0.42	22.6	6.25412	266.149						428																5.7121	4153.8			510.76	510.76			39.114	39.114
2019-12-06_00:00:00	2019-12-06 10:00:00	0	4.91	2.1	0	0	0	297.29	6.75	0.64	24.14	6.78027	264.584						330																4.41	4191.27			582.74	582.74			45.9721	45.9721
2019-12-06_01:00:00	2019-12-06 11:00:00	0	0	0	0	0	0	297.44	4.14	0.79	24.29	4.2147	259.197						181																0	4467.59			590.004	590.004			17.7637	17.7637
2019-12-06_02:00:00	2019-12-06 12:00:00	0	0.01	0	0	0	0	298.75	4.5	1.42	25.6	4.71873	252.487						130																0	4467.59			655.36	655.36			22.2664	22.2664
2019-12-06_03:00:00	2019-12-06 13:00:00	0	0.01	0	0	0	0	299.96	4.86	2.18	26.81	5.32654	245.841						222																0	4467.59			718.776	718.776			28.372	28.372
2019-12-06_04:00:00	2019-12-06 14:00:00	0	0.01	0	0	0	0	300.91	4.9	2.45	27.76	5.47837	243.435						255																0	4467.59			770.618	770.618			30.0125	30.0125
2019-12-06_05:00:00	2019-12-06 15:00:00	0	0.01	0	0	0	0	301.64	4.27	2.59	28.49	4.9941	238.761						386																0	4467.59			811.68	811.68			24.941	24.941
2019-12-06_06:00:00	2019-12-06 16:00:00	0	0.01	0	0	0	0	302.2	4.16	2.82	29.05	5.02573	235.867						362																0	4467.59			843.903	843.903			25.258	25.258
2019-12-06_07:00:00	2019-12-06 17:00:00	0	0.01	0	0	0	0	302.34	3.77	3.1	29.19	4.88087	230.57						239																0	4467.59			852.056	852.056			23.8229	23.8229
2019-12-06_08:00:00	2019-12-06 18:00:00	0	0.01	0	0	0	0	302.03	3.24	3.1	28.88	4.48415	226.265						162																0	4467.59			834.054	834.054			20.1076	20.1076
2019-12-06_09:00:00	2019-12-06 19:00:00	0	0.03	0	0	0	0	300.04	1.79	2.14	26.89	2.78993	219.911						96																0	4467.59			723.072	723.072			7.7837	7.7837
2019-12-06_10:00:00	2019-12-06 20:00:00	0	0.07	0	0	0	0	297.04	1.05	2.47	23.89	2.68392	203.03						74																0	4467.59			570.732	570.732			7.2034	7.2034
2019-12-06_11:00:00	2019-12-06 21:00:00	0	0.07	0	0	0	0	295.69	-0.22	2.48	22.54	2.48974	174.93						64																0	4467.59			508.052	508.052			6.1988	6.1988
2019-12-06_12:00:00	2019-12-06 22:00:00	0	0.03	0	0	0	0	294.24	-2.2	1.55	21.09	2.69119	125.166						63																0	4467.59			444.788	552.25			7.2425	7.2425
2019-12-06_13:00:00	2019-12-06 23:00:00	0	0.03	0.01	0	0	0	292.85	-3.24	-0.2	19.7	3.24617	86.4679						57																0.0001	4466.25			388.09	619.512			10.5376	10.5376
2019-12-06_14:00:00	2019-12-07 00:00:00	0	0.19	0.15	0.01	0	0	292.15	-3.92	-0.91	19	4.02424	76.9308						66																0.0225	4447.56			361	654.848			16.1945	16.1945
2019-12-06_15:00:00	2019-12-07 01:00:00	0	13.24	11.21	0.59	0	0	290.85	-4.45	-2.75	17.7	5.23116	58.285						77																125.664	3094.7			313.29	723.072			27.365	27.365
2019-12-06_16:00:00	2019-12-07 02:00:00	0	15.11	12.64	0.65	0	0	289.72	-3.98	-2.81	16.57	4.87201	54.7769						80																159.77	2937.64			274.565	785.12			23.7365	23.7365
2019-12-06_17:00:00	2019-12-07 03:00:00	0	19.37	16.47	0.84	0	0	288.83	-3.76	-2.76	15.68	4.66425	53.7199						68																271.261	2537.14			245.862	835.788			21.7552	21.7552
2019-12-06_18:00:00	2019-12-07 04:00:00	0	23.44	20.27	1.03	0	0	288.09	-3.57	-2.9	14.94	4.59945	50.9123						107																410.873	2168.76			223.204	879.123			21.1549	21.1549
2019-12-06_19:00:00	2019-12-07 05:00:00	0	25.07	21.97	1.12	0	0	287.67	-3.38	-3.33	14.52	4.74482	45.427						139																482.681	2013.32			210.83	904.205			22.5133	22.5133
2019-12-06_20:00:00	2019-12-07 06:00:00	0	24.4	21.68	1.1	0	0	290.4	-3.31	-3.78	17.25	5.02439	41.2075						223																470.022	2039.43			297.562	747.476			25.2445	25.2445
2019-12-06_21:00:00	2019-12-07 07:00:00	0	25.17	22.61	1.15	0	0	294.42	-2.72	-4.16	21.27	4.97031	33.1786						384																511.212	1956.29			452.413	543.822			24.704	24.704
2019-12-06_22:00:00	2019-12-07 08:00:00	0	17.28	15.68	0.8	0	0	298.43	-1.7	-4.93	25.28	5.21487	19.0257						550																245.862	2617.35			639.078	639.078			27.1949	27.1949
2019-12-06_23:00:00	2019-12-07 09:00:00	0	4.74	4.3	0.22	0	0	301.78	0.45	-5.11	28.63	5.12978	354.967						531																18.49	3911.25			819.677	819.677			26.3146	26.3146
2019-12-07_00:00:00	2019-12-07 10:00:00	0	1.65	1.5	0.08	0	0	303.5	1.61	-4.22	30.35	4.51669	339.117						408																2.25	4269.32			921.123	921.123			20.4005	20.4005
2019-12-07_01:00:00	2019-12-07 11:00:00	0	0.57	0.52	0.03	0	0	304.75	2.28	-3.54	31.6	4.2107	327.216						310																0.2704	4398.34			998.56	998.56			17.73	17.73
2019-12-07_02:00:00	2019-12-07 12:00:00	0	0.15	0.13	0.01	0	0	305.82	2.99	-2.53	32.67	3.91676	310.236						300																0.0169	4450.22			1067.33	1067.33			15.341	15.341
2019-12-07_03:00:00	2019-12-07 13:00:00	0	0.04	0.02	0	0	0	306.85	3.39	-1.61	33.7	3.75289	295.404						341																0.0004	4464.91			1135.69	1135.69			14.0842	14.0842
2019-12-07_04:00:00	2019-12-07 14:00:00	0.01	0.04	0.01	0	0	0	307.71	3.23	-1.55	34.56	3.58265	295.635						342																0.0001	4466.25			1194.39	1194.39			12.8354	12.8354
2019-12-07_05:00:00	2019-12-07 15:00:00	0.01	0.08	0.02	0	0	0	308.42	3.28	-1.94	35.27	3.81077	300.603						266																0.0004	4464.91			1243.97	1243.97			14.522	14.522
2019-12-07_06:00:00	2019-12-07 16:00:00	0.02	0.11	0.03	0	0	0	308.77	3.59	-1.99	35.62	4.10466	299						185																0.0009	4463.58			1268.78	1268.78			16.8482	16.8482
2019-12-07_07:00:00	2019-12-07 17:00:00	0.02	0.13	0.03	0	0	0	308.83	3.69	-2.68	35.68	4.56054	305.99						143																0.0009	4463.58			1273.06	1273.06			20.7985	20.7985
2019-12-07_08:00:00	2019-12-07 18:00:00	0.02	0.14	0.03	0	0	0	308.36	3.71	-3.13	35.21	4.85397	310.153						102																0.0009	4463.58			1239.74	1239.74			23.561	23.561
2019-12-07_09:00:00	2019-12-07 19:00:00	0.02	0.14	0.03	0	0	0	306.32	2.22	-3.09	33.17	3.8048	324.305						110																0.0009	4463.58			1100.25	1100.25			14.4765	14.4765
2019-12-07_10:00:00	2019-12-07 20:00:00	0.02	0.15	0.03	0	0	0	303.18	1.96	-3.17	30.03	3.727	328.272						85																0.0009	4463.58			901.801	901.801			13.8905	13.8905
2019-12-07_11:00:00	2019-12-07 21:00:00	0.02	0.15	0.03	0	0	0	302.15	1.86	-4.05	29	4.45669	335.333						79																0.0009	4463.58			841	841			19.8621	19.8621
2019-12-07_12:00:00	2019-12-07 22:00:00	0.02	0.15	0.03	0	0	0	301.25	1.42	-4.56	28.1	4.77598	342.703						72																0.0009	4463.58			789.61	789.61			22.81	22.81
2019-12-07_13:00:00	2019-12-07 23:00:00	0.02	0.14	0.03	0	0	0	300.58	0.93	-4.88	27.43	4.96783	349.21						67																0.0009	4463.58			752.405	752.405			24.6793	24.6793
2019-12-07_14:00:00	2019-12-08 00:00:00	0.02	0.14	0.03	0	0	0	299.45	0.87	-4.8	26.3	4.87821	349.727						57																0.0009	4463.58			691.69	691.69			23.7969	23.7969
2019-12-07_15:00:00	2019-12-08 01:00:00	0.02	0.14	0.03	0	0	0	298.22	0.54	-4.72	25.07	4.75079	353.473						63																0.0009	4463.58			628.505	628.505			22.57	22.57
2019-12-07_16:00:00	2019-12-08 02:00:00	0.02	0.16	0.04	0	0	0	296.35	-0.12	-4.63	23.2	4.63155	1.48473						65																0.0016	4462.24			538.24	538.24			21.4513	21.4513
2019-12-07_17:00:00	2019-12-08 03:00:00	0.02	0.16	0.04	0	0	0	295.78	-0.22	-5	22.63	5.00484	2.51947						80																0.0016	4462.24			512.117	512.117			25.0484	25.0484
2019-12-07_18:00:00	2019-12-08 04:00:00	0.02	0.18	0.05	0	0	0	292.52	2.23	-1.36	19.37	2.61199	301.378						99																0.0025	4460.9			375.197	636.048			6.8225	6.8225
2019-12-07_19:00:00	2019-12-08 05:00:00	0.02	0.23	0.11	0	0	0	292.27	0.21	-2.58	19.12	2.58853	355.347						143																0.0121	4452.89			365.574	648.721			6.7005	6.7005
2019-12-07_20:00:00	2019-12-08 06:00:00	0.02	0.42	0.29	0.01	0	0	294.92	-1.09	-2.92	21.77	3.11681	20.4701						140																0.0841	4428.9			473.933	520.752			9.7145	9.7145
2019-12-07_21:00:00	2019-12-08 07:00:00	0.01	0.99	0.84	0.04	0	0	299.14	-1.37	-4.46	25.99	4.66567	17.0757						188																0.7056	4356			675.48	675.48			21.7685	21.7685
2019-12-07_22:00:00	2019-12-08 08:00:00	0.01	0.91	0.77	0.03	0	0	302.19	-0.43	-3.68	29.04	3.70504	6.66475						357																0.5929	4365.24			843.322	843.322			13.7273	13.7273
2019-12-07_23:00:00	2019-12-08 09:00:00	0.01	0.25	0.18	0.01	0	0	305.41	1.61	-3.16	32.26	3.54651	333.001						415																0.0324	4443.56			1040.71	1040.71			12.5777	12.5777
2019-12-08_00:00:00	2019-12-08 10:00:00	0.04	0.31	0.06	0	0	0	307.5	3.26	-2.28	34.35	3.97819	304.968						482																0.0036	4459.57			1179.92	1179.92			15.826	15.826
2019-12-08_01:00:00	2019-12-08 11:00:00	1.56	12.46	2.33	0	0	0	309.23	4.7	-0.87	36.08	4.77984	280.487						533																5.4289	4161.54			1301.77	1301.77			22.8469	22.8469
2019-12-08_02:00:00	2019-12-08 12:00:00	4.02	29.52	5.94	0	0	0	309.99	4.36	-0.6	36.84	4.40109	277.836						401																35.2836	3708.81			1357.19	1357.19			19.3696	19.3696
2019-12-08_03:00:00	2019-12-08 13:00:00	4.36	31.65	6.42	0	0	0	310.79	4.67	-1.83	37.64	5.01576	291.398						362																41.2164	3650.58			1416.77	1416.77			25.1578	25.1578
2019-12-08_04:00:00	2019-12-08 14:00:00	4.5	32.95	6.61	0	0	0	311.4	5.62	-1.4	38.25	5.79175	283.988						417																43.6921	3627.65			1463.06	1463.06			33.5444	33.5444
2019-12-08_05:00:00	2019-12-08 15:00:00	4.36	32.06	6.4	0	0	0	311.69	5.69	-0.15	38.54	5.69198	271.51						500																40.96	3652.99			1485.33	1485.33			32.3986	32.3986
2019-12-08_06:00:00	2019-12-08 16:00:00	4.67	34.23	6.85	0	0	0	311.65	4.38	-0.49	38.5	4.40732	276.383						343																46.9225	3598.8			1482.25	1482.25			19.4245	19.4245
2019-12-08_07:00:00	2019-12-08 17:00:00	5.21	38.36	7.65	0	0	0	310.92	3.68	3.4	37.77	5.01023	227.265						205																58.5225	3503.46			1426.57	1426.57			25.1024	25.1024
2019-12-08_08:00:00	2019-12-08 18:00:00	4.26	32.01	6.28	0	0	0	310.03	2.89	5.33	36.88	6.06309	208.467						256																39.4384	3667.51			1360.13	1360.13			36.761	36.761
2019-12-08_09:00:00	2019-12-08 19:00:00	3.29	25.33	4.87	0	0	0	307.89	1.37	3.24	34.74	3.51774	202.921						213																23.7169	3840.28			1206.87	1206.87			12.3745	12.3745
2019-12-08_10:00:00	2019-12-08 20:00:00	3.04	23.57	4.51	0	0	0	305.21	-0.23	2.41	32.06	2.42095	174.548						485																20.3401	3885.03			1027.84	1027.84			5.861	5.861
2019-12-08_11:00:00	2019-12-08 21:00:00	3.28	25.13	4.89	0	0	0	302.7	-2.83	0.95	29.55	2.9852	108.556						438																23.9121	3837.8			873.203	873.203			8.9114	8.9114
2019-12-08_12:00:00	2019-12-08 22:00:00	3.67	27.55	5.48	0	0	0	301.76	-3.83	-0.76	28.61	3.90468	78.7765						160																30.0304	3765.05			818.532	818.532			15.2465	15.2465
2019-12-08_13:00:00	2019-12-08 23:00:00	3.75	29.45	6.85	0.07	0	0	301.28	-4.73	-0.1	28.13	4.73106	88.789						85																46.9225	3598.8			791.297	791.297			22.3829	22.3829
2019-12-08_14:00:00	2019-12-09 00:00:00	2.84	43.11	22.85	0.93	0	0	300.33	-4.15	-0.17	27.18	4.15348	87.6544						95																522.123	1935.12			738.752	738.752			17.2514	17.2514
2019-12-08_15:00:00	2019-12-09 01:00:00	1.41	43.58	29.75	1.28	0	0.01	298.19	-4.16	-0.11	25.04	4.16145	88.4855						53																885.062	1375.67			627.002	627.002			17.3177	17.3177
2019-12-08_16:00:00	2019-12-09 02:00:00	0.87	43.84	32.62	1.41	0	0.01	297.7	-4.11	-1.58	24.55	4.40324	68.972						67																1064.06	1171.01			602.703	602.703			19.3885	19.3885
2019-12-08_17:00:00	2019-12-09 03:00:00	0.83	46.45	35.09	1.54	0	0.01	296.39	-3.91	-1.57	23.24	4.21343	68.123						74																1231.31	1231.31			540.098	540.098			17.753	17.753
2019-12-08_18:00:00	2019-12-09 04:00:00	0.92	43.91	32.15	1.37	0	0.01	295.67	-4.45	-2.37	22.52	5.04177	61.9611						87																1033.62	1203.4			507.15	507.15			25.4194	25.4194
2019-12-08_19:00:00	2019-12-09 05:00:00	0.96	41.04	29.47	1.22	0	0.01	294.88	-4.75	-2.25	21.73	5.25595	64.654						454																868.481	1396.52			472.193	522.58			27.625	27.625
2019-12-08_20:00:00	2019-12-09 06:00:00	1.1	39.06	27.22	1.11	0	0.01	297.34	-5.66	-2.31	24.19	6.11324	67.7984						1072																740.928	1569.74			585.156	585.156			37.3717	37.3717
2019-12-08_21:00:00	2019-12-09 07:00:00	1.23	35.01	23.51	0.94	0	0	299.69	-4.08	-2.16	26.54	4.61649	62.1029						901																552.72	1877.49			704.372	704.372			21.312	21.312
2019-12-08_22:00:00	2019-12-09 08:00:00	1.13	21.65	13.55	0.52	0	0	302.47	-2.16	-3.23	29.32	3.88568	33.772						1238																183.603	2839.82			859.662	859.662			15.0985	15.0985
2019-12-08_23:00:00	2019-12-09 09:00:00	0.58	6.82	3.64	0.12	0	0	305.77	0.49	-3.73	32.62	3.76205	352.516						787																13.2496	3994.24			1064.06	1064.06			14.153	14.153
2019-12-09_00:00:00	2019-12-09 10:00:00	0.28	2.45	1.11	0.03	0	0	308.51	2.55	-3.84	35.36	4.60957	326.413						701																1.2321	4320.43			1250.33	1250.33			21.2481	21.2481
2019-12-09_01:00:00	2019-12-09 11:00:00	0.12	1.04	0.41	0.01	0	0	310.72	4.52	-4.15	37.57	6.1362	312.556						649																0.1681	4412.94			1411.5	1411.5			37.6529	37.6529
2019-12-09_02:00:00	2019-12-09 12:00:00	0.23	1.92	0.53	0.01	0	0	312.27	5.32	-4.25	39.12	6.80918	308.62						695																0.2809	4397.02			1530.37	1530.37			46.3649	46.3649
2019-12-09_03:00:00	2019-12-09 13:00:00	0.66	5.04	1.11	0.01	0	0	313.28	6.7	-3.56	40.13	7.58707	297.984						1103																1.2321	4320.43			1610.42	1610.42			57.5636	57.5636
2019-12-09_04:00:00	2019-12-09 14:00:00	1.11	8.46	1.76	0.01	0	0	313.78	7.9	-2.2	40.63	8.20061	285.562						1437																3.0976	4235.41			1650.8	1650.8			67.25	67.25
2019-12-09_05:00:00	2019-12-09 15:00:00	2.09	16.27	3.55	0.02	0	0	313.92	8.51	-0.72	40.77	8.5404	274.836						2745																12.6025	4005.62			1662.19	1662.19			72.9385	72.9385
2019-12-09_06:00:00	2019-12-09 16:00:00	3.13	25.49	5.74	0.05	0	0	313.84	8.45	0.29	40.69	8.45497	268.034						3743																32.9476	3733.21			1655.68	1655.68			71.4866	71.4866
2019-12-09_07:00:00	2019-12-09 17:00:00	3.03	27.29	7.73	0.14	0	0	312.99	8.33	2.33	39.84	8.64973	254.373						4104																59.7529	3493.99			1587.23	1587.23			74.8178	74.8178
2019-12-09_08:00:00	2019-12-09 18:00:00	3.68	33.12	9.93	0.2	0	0	311.58	6.64	3.45	38.43	7.48279	242.545						5804																98.6049	3238.75			1476.86	1476.86			55.9921	55.9921
2019-12-09_09:00:00	2019-12-09 19:00:00	4.2	34.86	8.59	0.1	0	0	309.61	4.78	4.32	36.46	6.44289	227.894						8511																73.7881	3393.06			1329.33	1329.33			41.5108	41.5108
2019-12-09_10:00:00	2019-12-09 20:00:01	4.83	35.55	7.52	0.02	0	0	306.83	2.25	5.7	33.68	6.12801	201.541						8060																56.5504	3518.86			1134.34	1134.34			37.5525	37.5525
2019-12-09_11:00:00	2019-12-09 21:00:01	5.31	37.83	8.05	0.01	0	0	304.84	-0.39	3.67	31.69	3.69066	173.934						4619																64.8025	3456.26			1004.26	1004.26			13.621	13.621
2019-12-09_12:00:00	2019-12-09 22:00:01	4.8	34.8	7.61	0.02	0	0	302.02	0.86	2.7	28.87	2.83365	197.668																						57.9121	3508.19			833.477	833.477			8.0296	8.0296
2019-12-09_13:00:00	2019-12-09 23:00:01	4.86	35.33	7.76	0.02	0	0	300.8	2.32	1.59	27.65	2.81256	235.575						2115																60.2176	3490.45			764.523	764.523			7.9105	7.9105
2019-12-09_14:00:00	2019-12-10 00:00:01	4.66	34.26	7.68	0.03	0	0	301.03	1.49	1.46	27.88	2.08607	225.583						2035																58.9824	3499.91			777.294	777.294			4.3517	4.3517
2019-12-09_15:00:00	2019-12-10 01:00:01	4.53	33.48	7.79	0.05	0	0	300.53	1.53	1.22	27.38	1.95686	231.432						1946																60.6841	3486.9			749.664	749.664			3.8293	4.66189
2019-12-09_16:00:00	2019-12-10 02:00:01	4.65	33.33	7.76	0.04	0	0	299.84	2.26	0.12	26.69	2.26318	266.961						2061																60.2176	3490.45			712.356	712.356			5.122	5.122
2019-12-09_17:00:00	2019-12-10 03:00:01	4.18	30.7	7.27	0.04	0	0	299.48	3.56	0.17	26.33	3.56406	267.266						1861																52.8529	3548.58			693.269	693.269			12.7025	12.7025
2019-12-09_18:00:00	2019-12-10 04:00:01	3.53	34.9	12.42	0.34	0	0	298.23	4.27	1.34	25.08	4.47532	252.577						1942																154.256	2961.54			629.006	629.006			20.0285	20.0285
2019-12-09_19:00:00	2019-12-10 05:00:01	3.86	55.05	30.17	1.24	0	0	296.99	3.76	1.68	23.84	4.11825	245.924						3079																910.229	1344.69			568.346	568.346			16.96	16.96
2019-12-09_20:00:00	2019-12-10 06:00:01	4.03	79.67	52.25	2.36	0.01	0	297.04	3.98	1.95	23.89	4.43203	243.897						2822																2730.06	2730.06			570.732	570.732			19.6429	19.6429
2019-12-09_21:00:00	2019-12-10 07:00:01	3.97	99.78	70.58	3.3	0.01	0.01	298.58	4.54	2.21	25.43	5.04933	244.044						2721																4981.54	4981.54			646.685	646.685			25.4957	25.4957
2019-12-09_22:00:00	2019-12-10 08:00:01	3.36	81.64	57.74	2.66	0.01	0	300.61	4.91	2.93	27.46	5.71778	239.174						2321																3333.91	3333.91			754.052	754.052			32.693	32.693
2019-12-09_23:00:00	2019-12-10 09:00:01	2.48	34.36	18.11	0.69	0	0	302.09	5.35	2.99	28.94	6.12883	240.8						2253																327.972	2374.61			837.524	837.524			37.5626	37.5626
2019-12-10_00:00:00	2019-12-10 10:00:01	2.76	21.68	5.38	0.03	0	0	302.92	5.88	3.49	29.77	6.83773	239.309						2317																28.9444	3777.33			886.253	886.253			46.7545	46.7545
2019-12-10_01:00:00	2019-12-10 11:00:01	2.26	16.6	4.1	0.01	0	0	303.62	6.7	3.24	30.47	7.44228	244.192						2430																16.81	3936.31			928.421	928.421			55.3876	55.3876
2019-12-10_02:00:00	2019-12-10 12:00:01	0.72	6.02	1.53	0	0	0	304.31	7.05	3.26	31.16	7.76725	245.184						2464																2.3409	4265.4			970.946	970.946			60.3301	60.3301
2019-12-10_03:00:00	2019-12-10 13:00:01	0.11	1.53	0.49	0	0	0	304.92	7.35	3.37	31.77	8.08575	245.368						2466																0.2401	4402.32			1009.33	1009.33			65.3794	65.3794
2019-12-10_04:00:00	2019-12-10 14:00:01	0.01	0.63	0.32	0	0	0	305.44	7.48	3.62	32.29	8.30992	244.175						2526																0.1024	4424.91			1042.64	1042.64			69.0548	69.0548
2019-12-10_05:00:00	2019-12-10 15:00:01	0	0.75	0.38	0	0	0	305.75	7.25	3.79	32.6	8.18087	242.401						3339																0.1444	4416.93			1062.76	1062.76			66.9266	66.9266
2019-12-10_06:00:00	2019-12-10 16:00:01	0	0.93	0.46	0	0	0	305.69	6.74	4.08	32.54	7.87871	238.812						2864																0.2116	4406.3			1058.85	1058.85			62.074	62.074
2019-12-10_07:00:00	2019-12-10 17:00:01	0	1.14	0.58	0	0	0	305.27	6.19	4.23	32.12	7.49727	235.653						3100																0.3364	4390.39			1031.69	1031.69			56.209	56.209
2019-12-10_08:00:00	2019-12-10 18:00:01	0	1.83	0.88	0	0	0	304.38	5.75	4.43	31.23	7.25861	232.388						2312																0.7744	4350.72			975.313	975.313			52.6874	52.6874
2019-12-10_09:00:00	2019-12-10 19:00:01	0	2.79	1.27	0	0	0	302.57	4.82	3.8	29.42	6.13778	231.748						1449																1.6129	4299.42			865.536	865.536			37.6724	37.6724
2019-12-10_10:00:00	2019-12-10 20:00:01	0	3.53	1.54	0	0	0	299.93	4.17	3.3	26.78	5.31779	231.643						1069																2.3716	4264.09			717.168	717.168			28.2789	28.2789
2019-12-10_11:00:00	2019-12-10 21:00:01	0	3.5	1.57	0	0	0	298.02	4.07	3.45	24.87	5.33548	229.713						523																2.4649	4260.17			618.517	618.517			28.4674	28.4674
2019-12-10_12:00:00	2019-12-10 22:00:01	0	5.19	2.45	0.01	0	0	296.18	3.38	2.88	23.03	4.44059	229.567						531																6.0025	4146.07			530.381	530.381			19.7188	19.7188
2019-12-10_13:00:00	2019-12-10 23:00:01	0.05	45.02	33.74	1.58	0	0	293.87	-3.88	-1.67	20.72	4.22413	66.7125						404																1138.39	1138.39			429.318	569.777			17.8433	17.8433
2019-12-10_14:00:00	2019-12-11 00:00:01	0.12	85.58	62.67	2.86	0.01	0	289.77	-5.95	-3.58	16.62	6.94398	58.9656						358																3927.53	3927.53			276.224	782.321			48.2189	48.2189
2019-12-10_15:00:00	2019-12-11 01:00:01	0.08	57.52	38.93	1.59	0	0	288.55	-6.43	-3.67	15.4	7.40363	60.284						326																1515.54	1515.54			237.16	852.056			54.8138	54.8138
2019-12-10_16:00:00	2019-12-11 02:00:01	0.07	34.73	19.78	0.58	0	0	288.01	-7.26	-3.84	14.86	8.21299	62.1246						330																391.248	2214.64			220.82	883.873			67.4532	67.4532
2019-12-10_17:00:00	2019-12-11 03:00:01	0.06	26.85	13.8	0.28	0	0	287.44	-6.91	-3.98	14.29	7.97424	60.0592						386																190.44	2813.24			204.204	918.09			63.5885	63.5885
2019-12-10_18:00:00	2019-12-11 04:00:01	0.04	23.39	11.88	0.2	0	0	286.83	-6.45	-3.71	13.68	7.44087	60.0929						263																141.134	3020.6			187.142	955.428			55.3666	55.3666
2019-12-10_19:00:00	2019-12-11 05:00:01	0.03	20.58	10.64	0.18	0	0	286.35	-6.34	-3.29	13.2	7.14281	62.5741						342																113.21	3158.44			174.24	985.332			51.0197	51.0197
2019-12-10_20:00:00	2019-12-11 06:00:01	0.03	18.06	9.63	0.17	0	0	287.6	-7.37	-3.16	14.45	8.01888	66.7922						271																92.7369	3272.98			208.803	908.42			64.3025	64.3025
2019-12-10_21:00:00	2019-12-11 07:00:01	0.03	16.58	9.02	0.16	0	0	289.59	-6.88	-3	16.44	7.50562	66.4407						215																81.3604	3343.15			270.274	792.423			56.3344	56.3344
2019-12-10_22:00:00	2019-12-11 08:00:01	0.04	17.84	10.1	0.22	0	0	292.06	-5.77	-3.22	18.91	6.60767	60.836						193																102.01	3219.43			357.588	659.462			43.6613	43.6613
2019-12-10_23:00:00	2019-12-11 09:00:01	0.09	22.01	13.3	0.36	0	0	294.19	-3.48	-2.97	21.04	4.57507	49.5211						221																176.89	2866.53			442.682	554.602			20.9313	20.9313
2019-12-11_00:00:00	2019-12-11 10:00:01	0.13	25.97	17.03	0.55	0	0	296.12	-1.15	-2.29	22.97	2.56254	26.6651						213																290.021	2481.04			527.621	527.621			6.5666	6.5666
2019-12-11_01:00:00	2019-12-11 11:00:01	0.12	24.7	16.8	0.57	0	0	297.72	0.47	-1.35	24.57	1.42948	340.805						206																282.24	2504			603.685	603.685			2.0434	7.21741
2019-12-11_02:00:00	2019-12-11 12:00:01	0.1	21.81	15.1	0.53	0	0	299.36	1.75	-0.14	26.21	1.75559	274.574						244																228.01	2677.03			686.964	686.964			3.0821	5.57153
2019-12-11_03:00:00	2019-12-11 13:00:01	0.08	18.69	13.02	0.45	0	0	300.86	2.84	0.99	27.71	3.00761	250.782						255																169.52	2896.59			767.844	767.844			9.0457	9.0457
2019-12-11_04:00:00	2019-12-11 14:00:01	0.05	15.32	10.75	0.37	0	0	301.96	3.8	1.67	28.81	4.15077	246.276						340																115.562	3146.09			830.016	830.016			17.2289	17.2289
2019-12-11_05:00:00	2019-12-11 15:00:01	0.03	13.68	9.74	0.34	0	0	302.66	4.52	2.1	29.51	4.98401	245.08						543																94.8676	3260.41			870.84	870.84			24.8404	24.8404
2019-12-11_06:00:00	2019-12-11 16:00:01	0.02	12.79	9.22	0.32	0	0	302.95	4.66	2.3	29.8	5.19669	243.731						472																85.0084	3320.06			888.04	888.04			27.0056	27.0056
2019-12-11_07:00:00	2019-12-11 17:00:01	0.02	12.58	9.13	0.32	0	0	302.93	4.69	2.89	29.78	5.50892	238.358						578																83.3569	3330.44			886.848	886.848			30.3482	30.3482
2019-12-11_08:00:00	2019-12-11 18:00:01	0.02	13.9	10.31	0.37	0	0	302.43	4.53	3.12	29.28	5.50048	235.443						1224																106.296	3195.64			857.318	857.318			30.2553	30.2553
2019-12-11_09:00:00	2019-12-11 19:00:01	0.02	16.05	12.16	0.45	0	0	301.3	3.81	2.88	28.15	4.77603	232.914						1656																147.866	2989.9			792.423	792.423			22.8105	22.8105
2019-12-11_10:00:00	2019-12-11 20:00:01	0.02	16.67	12.61	0.46	0	0	299.08	3.22	2.45	25.93	4.0461	232.734						1442																159.012	2940.89			672.365	672.365			16.3709	16.3709
2019-12-11_11:00:00	2019-12-11 21:00:01	0.01	14.7	11.27	0.42	0	0	297.58	3.24	2.65	24.43	4.1857	230.72						838																127.013	3088.02			596.825	596.825			17.5201	17.5201
2019-12-11_12:00:00	2019-12-11 22:00:01	0.01	9.88	6.6	0.2	0	0	294.84	-0.76	1.9	21.69	2.04636	158.198						198																43.56	3628.86			470.456	524.41			4.1876	4.2834
2019-12-11_13:00:00	2019-12-11 23:00:01	0.01	19.8	8.94	0.1	0	0	291.84	-6.3	-3	18.69	6.97782	64.5368						112																79.9236	3352.41			349.316	670.81			48.69	48.69
2019-12-11_14:00:00	2019-12-12 00:00:01	0.01	21.11	9.49	0.11	0	0	289.95	-6.06	-1.85	16.8	6.3361	73.0237						96																90.0601	3289.02			282.24	772.284			40.1461	40.1461
2019-12-11_15:00:00	2019-12-12 01:00:01	0.01	22.26	10.34	0.13	0	0	289.19	-6.76	-2.2	16.04	7.10898	71.973						73																106.916	3192.25			257.282	815.102			50.5376	50.5376
2019-12-11_16:00:00	2019-12-12 02:00:01	0.01	22.32	10.45	0.13	0	0	288.6	-5.77	-1.43	15.45	5.94456	76.0808						77																109.202	3179.83			238.703	849.14			35.3378	35.3378
2019-12-11_17:00:00	2019-12-12 03:00:01	0.02	22.28	10.46	0.12	0	0	287.87	-3.56	0.57	14.72	3.60534	99.0964						83																109.412	3178.7			216.678	892.217			12.9985	12.9985
2019-12-11_18:00:00	2019-12-12 04:00:01	0.02	21.87	10.46	0.13	0	0	287.09	-1.43	2.36	13.94	2.75944	148.787						95																109.412	3178.7			194.324	939.423			7.6145	7.6145
2019-12-11_19:00:00	2019-12-12 05:00:01	0.02	21.12	10.43	0.14	0	0	286.43	-0.91	2.6	13.28	2.75465	160.71						126																108.785	3182.09			176.358	980.316			7.5881	7.5881
2019-12-11_20:00:00	2019-12-12 06:00:01	0.02	20.77	10.44	0.15	0	0	288.33	-2.57	1.86	15.18	3.17246	125.894						192																108.994	3180.96			230.432	864.948			10.0645	10.0645
2019-12-11_21:00:00	2019-12-12 07:00:01	0.02	21.26	10.83	0.16	0	0	289.66	-3.02	0.51	16.51	3.06276	99.5852						188																117.289	3137.12			272.58	788.486			9.3805	9.3805
2019-12-11_22:00:00	2019-12-12 08:00:01	0.02	21.85	11.48	0.19	0	0	291.53	-1.55	1.15	18.38	1.93003	126.573						172																131.79	3064.73			337.824	686.964			3.725	4.77848
2019-12-11_23:00:00	2019-12-12 09:00:01	0.02	22.13	12.26	0.24	0	0	293.48	0.35	2.17	20.33	2.19804	189.162						212																150.308	2978.98			413.309	588.548			4.8314	4.8314
2019-12-12_00:00:00	2019-12-12 10:00:01	0.02	18.73	10.57	0.21	0	0	295.37	2.43	3.29	22.22	4.09011	216.45						231																111.725	3166.31			493.728	500.417			16.729	16.729
2019-12-12_01:00:00	2019-12-12 11:00:01	0.01	12.08	6.7	0.12	0	0	297	4.33	3.62	23.85	5.64387	230.103						320																44.89	3616.82			568.823	568.823			31.8533	31.8533
2019-12-12_02:00:00	2019-12-12 12:00:01	0	4.7	2.58	0.04	0	0	298.3	5.3	4.67	25.15	7.06392	228.616						328																6.6564	4129.35			632.523	632.523			49.8989	49.8989
2019-12-12_03:00:00	2019-12-12 13:00:01	0	1.53	0.83	0.01	0	0	299.23	5.69	5.59	26.08	7.97648	225.508						500																0.6889	4357.32			680.166	680.166			63.6242	63.6242
2019-12-12_04:00:00	2019-12-12 14:00:01	0	0.28	0.15	0	0	0	299.81	5.85	5.89	26.66	8.30148	224.805						458																0.0225	4447.56			710.756	710.756			68.9146	68.9146
2019-12-12_05:00:00	2019-12-12 15:00:01	0	0.2	0.11	0	0	0	300.14	5.91	5.72	26.99	8.22475	225.936						529																0.0121	4452.89			728.46	728.46			67.6465	67.6465
2019-12-12_06:00:00	2019-12-12 16:00:01	0	0.56	0.27	0	0	0	300.27	5.83	5.77	27.12	8.20255	225.296						519																0.0729	4431.56			735.494	735.494			67.2818	67.2818
2019-12-12_07:00:00	2019-12-12 17:00:01	0	1.1	0.53	0	0	0	300.03	5.65	5.96	26.88	8.21244	223.47						521																0.2809	4397.02			722.534	722.534			67.4441	67.4441
2019-12-12_08:00:00	2019-12-12 18:00:01	0	1.91	1.04	0	0	0	299.23	5.45	6.37	26.08	8.38328	220.549						1175																1.0816	4329.64			680.166	680.166			70.2794	70.2794
2019-12-12_09:00:00	2019-12-12 19:00:01	0	2.04	1.04	0	0	0	297.57	5.11	5.98	24.42	7.86591	220.514						1269																1.0816	4329.64			596.336	596.336			61.8725	61.8725
2019-12-12_10:00:00	2019-12-12 20:00:01	0	2.04	1.01	0	0	0	295.27	4.5	4.92	22.12	6.66756	222.447						770																1.0201	4333.59			489.294	504.901			44.4564	44.4564
2019-12-12_11:00:00	2019-12-12 21:00:01	0	2.72	1.28	0	0	0	293.71	4.4	4.27	20.56	6.1313	225.859						816																1.6384	4298.11			422.714	577.441			37.5929	37.5929
2019-12-12_12:00:00	2019-12-12 22:00:01	0	3.97	1.77	0	0	0	292.27	4.08	4.28	19.12	5.9131	223.63						407																3.1329	4234.1			365.574	648.721			34.9648	34.9648
2019-12-12_13:00:00	2019-12-12 23:00:01	0	5.89	2.73	0.02	0	0	291.06	3.6	4.81	17.91	6.008	216.813						193																7.4529	4110.09			320.768	711.822			36.0961	36.0961
2019-12-12_14:00:00	2019-12-13 00:00:01	0	6.84	3.29	0.04	0	0	289.87	1.76	4	16.72	4.37008	203.749						97																10.8241	4038.6			279.558	776.737			19.0976	19.0976
2019-12-12_15:00:00	2019-12-13 01:00:01	0	8.83	4.99	0.12	0	0	288.71	1.48	3.46	15.56	3.76324	203.159						75																24.9001	3825.42			242.114	842.741			14.162	14.162
2019-12-12_16:00:00	2019-12-13 02:00:01	0	13.34	8.57	0.29	0	0	287.47	0.79	2.96	14.32	3.06361	194.943						90																73.4449	3395.39			205.062	916.273			9.3857	9.3857
2019-12-12_17:00:00	2019-12-13 03:00:01	0	19.71	13.41	0.49	0	0	286.36	0.16	2.73	13.21	2.73468	183.354						90																179.828	2854.76			174.504	984.704			7.4785	7.4785
2019-12-12_18:00:00	2019-12-13 04:00:01	0	26.41	18.54	0.7	0	0	285.42	0.13	2.62	12.27	2.62322	182.841						153																343.732	2332.89			150.553	1044.58			6.8813	6.8813
2019-12-12_19:00:00	2019-12-13 05:00:01	0	30.94	22.02	0.84	0	0	284.35	0.24	2.09	11.2	2.10373	186.551						159																484.88	2008.83			125.44	1114.89			4.4257	4.4257
2019-12-12_20:00:00	2019-12-13 06:00:01	0	32.39	23.03	0.86	0	0	285.82	1.05	1.43	12.67	1.77409	216.289						188																530.381	1919.32			160.529	1018.89			3.1474	5.48454
2019-12-12_21:00:00	2019-12-13 07:00:01	0	31.94	22.41	0.81	0	0	288.27	1.56	1	15.12	1.853	237.339						142																502.208	1974.02			228.614	868.481			3.4336	5.12118
2019-12-12_22:00:00	2019-12-13 08:00:01	0	29.23	20.2	0.69	0	0	290.05	2.64	1.44	16.9	3.00719	241.39						125																408.04	2175.29			285.61	766.736			9.0432	9.0432
2019-12-12_23:00:00	2019-12-13 09:00:01	0	19.03	12.59	0.38	0	0	291.93	3.61	2.53	18.78	4.40829	234.976						103																158.508	2943.06			352.688	666.156			19.433	19.433
2019-12-13_00:00:00	2019-12-13 10:00:01	0	9.9	5.73	0.11	0	0	293.79	4.22	3.2	20.64	5.29607	232.827						94																32.8329	3734.43			426.01	573.602			28.0484	28.0484
2019-12-13_01:00:00	2019-12-13 11:00:01	0	6.61	3.61	0.04	0	0	295.23	4.81	3.8	22.08	6.12993	231.69						103																13.0321	3998.03			487.526	506.7			37.5761	37.5761
2019-12-13_02:00:00	2019-12-13 12:00:01	0	4.54	2.39	0.02	0	0	296.36	5.36	4.53	23.21	7.01787	229.797						113																5.7121	4153.8			538.704	538.704			49.2505	49.2505
2019-12-13_03:00:00	2019-12-13 13:00:01	0	3.77	1.91	0.01	0	0	297.11	5.77	4.97	23.96	7.61537	229.26						146																3.6481	4215.9			574.082	574.082			57.9938	57.9938
2019-12-13_04:00:00	2019-12-13 14:00:01	0	2.54	1.29	0	0	0	297.7	6	4.92	24.55	7.75928	230.648						321																1.6641	4296.8			602.703	602.703			60.2064	60.2064
2019-12-13_05:00:00	2019-12-13 15:00:01	0	2.64	1.34	0	0	0	298.2	6.18	5.21	25.05	8.0831	229.868						457																1.7956	4290.25			627.503	627.503			65.3365	65.3365
2019-12-13_06:00:00	2019-12-13 16:00:01	0	4.94	2.34	0	0	0	298.37	6.14	5.55	25.22	8.2766	227.889						220																5.4756	4160.25			636.048	636.048			68.5021	68.5021
2019-12-13_07:00:00	2019-12-13 17:00:01	0	6.3	2.84	0	0	0	298.24	5.97	5.82	25.09	8.33746	225.729						243																8.0656	4096			629.508	629.508			69.5133	69.5133
2019-12-13_08:00:00	2019-12-13 18:00:01	0	5.27	2.41	0	0	0	297.68	5.8	6.06	24.53	8.3883	223.744						246																5.8081	4151.22			601.721	601.721			70.3636	70.3636
2019-12-13_09:00:00	2019-12-13 19:00:01	0	4.52	2.13	0	0	0	296.66	5.3	5.69	23.51	7.776	222.968						381																4.5369	4187.38			552.72	552.72			60.4661	60.4661
2019-12-13_10:00:00	2019-12-13 20:00:01	0	4.03	1.87	0	0	0	295.19	3.78	4.49	22.04	5.86928	220.093						255																3.4969	4221.1			485.762	508.502			34.4485	34.4485
2019-12-13_11:00:00	2019-12-13 21:00:01	0	3.1	1.43	0	0	0	294.07	2.59	4.41	20.92	5.11431	210.426						164																2.0449	4278.47			437.646	560.269			26.1562	26.1562
2019-12-13_12:00:00	2019-12-13 22:00:01	0	2.88	1.33	0	0	0	292.89	1.65	4.01	19.74	4.3362	202.366						164																1.7689	4291.56			389.668	617.522			18.8026	18.8026
2019-12-13_13:00:00	2019-12-13 23:00:01	0	3.25	1.49	0	0	0	291.72	1.14	3.74	18.57	3.90988	196.952						260																2.2201	4270.62			344.845	677.04			15.2872	15.2872
2019-12-13_14:00:00	2019-12-14 00:00:01	0	4.2	1.91	0	0	0	290.51	1.08	2.97	17.36	3.16027	199.983						277																3.6481	4215.9			301.37	741.473			9.9873	9.9873
2019-12-13_15:00:00	2019-12-14 01:00:01	0	5.79	2.6	0	0	0	289.27	0.95	2.57	16.12	2.73996	200.287						129																6.76	4126.78			259.854	810.541			7.5074	7.5074
2019-12-13_16:00:00	2019-12-14 02:00:01	0	5.31	2.44	0	0	0	288.11	0.63	2.43	14.96	2.51034	194.534						113																5.9536	4147.36			223.802	877.937			6.3018	6.3018
2019-12-13_17:00:00	2019-12-14 03:00:01	0	4.44	2.08	0	0	0	287.14	0.73	2.24	13.99	2.35595	198.05						106																4.3264	4193.86			195.72	936.36			5.5505	5.5505
2019-12-13_18:00:00	2019-12-14 04:00:01	0	3.97	1.88	0	0	0	286.3	1.11	1.84	13.15	2.14888	211.101						95																3.5344	4219.8			172.923	988.474			4.6177	4.6177
2019-12-13_19:00:00	2019-12-14 05:00:01	0	3.71	1.77	0	0	0	285.69	1.63	1.43	12.54	2.16836	228.739						110																3.1329	4234.1			157.252	1027.2			4.7018	4.7018
2019-12-13_20:00:00	2019-12-14 06:00:01	0	3.65	1.72	0	0	0	288.02	2.31	2.05	14.87	3.08846	228.413						152																2.9584	4240.61			221.117	883.278			9.5386	9.5386
2019-12-13_21:00:00	2019-12-14 07:00:01	0	3.16	1.5	0	0	0	289.7	2.86	2.47	16.55	3.77895	229.185						232																2.25	4269.32			273.903	786.242			14.2805	14.2805
2019-12-13_22:00:00	2019-12-14 08:00:01	0	2.45	1.17	0	0	0	291.43	3.69	2.55	18.28	4.48538	235.353						310																1.3689	4312.55			334.158	692.216			20.1186	20.1186
2019-12-13_23:00:00	2019-12-14 09:00:01	0	1.75	0.85	0	0	0	293.12	4.65	2.7	19.97	5.37703	239.859						135																0.7225	4354.68			398.801	606.144			28.9125	28.9125
2019-12-14_00:00:00	2019-12-14 10:00:01	0	1.43	0.72	0	0	0	294.48	5.35	3.07	21.33	6.16826	240.151						105																0.5184	4371.85			454.969	541.028			38.0474	38.0474
2019-12-14_01:00:00	2019-12-14 11:00:01	0	1.42	0.74	0	0	0	295.64	5.74	3.26	22.49	6.60115	240.406						93																0.5476	4369.21			505.8	505.8			43.5752	43.5752
2019-12-14_02:00:00	2019-12-14 12:00:01	0	1.43	0.75	0	0	0	297	5.87	3.26	23.85	6.7145	240.954						114																0.5625	4367.89			568.823	568.823			45.0845	45.0845
2019-12-14_03:00:00	2019-12-14 13:00:01	0	1.45	0.74	0	0	0	298.42	6.28	3.77	25.27	7.3247	239.023						151																0.5476	4369.21			638.573	638.573			53.6513	53.6513
2019-12-14_04:00:00	2019-12-14 14:00:01	0	1.19	0.63	0	0	0	299.62	6.6	3.87	26.47	7.65094	239.614						176																0.3969	4383.76			700.661	700.661			58.5369	58.5369
2019-12-14_05:00:00	2019-12-14 15:00:01	0	1.09	0.6	0	0	0	300.4	6.77	4.06	27.25	7.89408	239.049						238																0.36	4387.74			742.562	742.562			62.3165	62.3165
2019-12-14_06:00:00	2019-12-14 16:00:01	0	1.16	0.63	0	0	0	300.69	6.71	4.09	27.54	7.85826	238.636						189																0.3969	4383.76			758.452	758.452			61.7522	61.7522
2019-12-14_07:00:00	2019-12-14 17:00:01	0	1.21	0.66	0	0	0	300.46	6.65	4.38	27.31	7.96284	236.629						120																0.4356	4379.79			745.836	745.836			63.4069	63.4069
2019-12-14_08:00:00	2019-12-14 18:00:01	0	1.44	0.79	0	0	0	299.96	6.25	4.67	26.81	7.80201	233.233						94																0.6241	4362.6			718.776	718.776			60.8714	60.8714
2019-12-14_09:00:00	2019-12-14 19:00:01	0	1.91	1.03	0	0	0	298.77	4.95	4.45	25.62	6.6562	228.045						91																1.0609	4330.96			656.384	656.384			44.305	44.305
2019-12-14_10:00:00	2019-12-14 20:00:01	0	2.33	1.22	0	0	0	296.74	3.09	3.19	23.59	4.44119	224.088						69																1.4884	4305.98			556.488	556.488			19.7242	19.7242
2019-12-14_11:00:00	2019-12-14 21:00:01	0	3.04	1.54	0	0	0	295.25	2.34	2.65	22.1	3.53527	221.445						56																2.3716	4264.09			488.41	505.8			12.4981	12.4981
2019-12-14_12:00:00	2019-12-14 22:00:01	0	3.98	2	0	0	0	293.56	1.68	1.86	20.41	2.50639	222.089						60																4	4204.23			416.568	584.672			6.282	6.282
2019-12-14_13:00:00	2019-12-14 23:00:01	0	4.87	2.41	0	0	0	292.67	0.76	1.44	19.52	1.62825	207.824						62																5.8081	4151.22			381.03	628.505			2.6512	6.1889
2019-12-14_14:00:00	2019-12-15 00:00:01	0	5.13	2.46	0	0	0	291.46	-0.77	1.71	18.31	1.87537	155.758						66																6.0516	4144.78			335.256	690.638			3.517	5.02044
2019-12-14_15:00:00	2019-12-15 01:00:01	0	4.87	2.27	0	0	0	290.47	-1.52	1.3	17.32	2.0001	130.539						87																5.1529	4169.28			299.982	743.653			4.0004	4.47703
2019-12-14_16:00:00	2019-12-15 02:00:01	0	5.15	2.44	0.01	0	0	290.14	-1.71	0.67	16.99	1.83657	111.396						71																5.9536	4147.36			288.66	761.76			3.373	5.19579
2019-12-14_17:00:00	2019-12-15 03:00:01	0	5.8	2.87	0.03	0	0	289.22	-1.86	-0.08	16.07	1.86172	87.5373						84																8.2369	4092.16			258.245	813.39			3.466	5.08178
2019-12-14_18:00:00	2019-12-15 04:00:01	0	5.83	2.9	0.03	0	0	288.39	-2.31	-1.55	15.24	2.78183	56.1387						77																8.41	4088.32			232.258	861.422			7.7386	7.7386
2019-12-14_19:00:00	2019-12-15 05:00:01	0	5.79	2.83	0.02	0	0	287.8	-2.13	-2.56	14.65	3.33024	39.7616						115																8.0089	4097.28			214.623	896.404			11.0905	11.0905
2019-12-14_20:00:00	2019-12-15 06:00:01	0	6.46	3.18	0.02	0	0	290.1	-1.78	-2.62	16.95	3.16746	34.1919						140																10.1124	4052.6			287.303	763.97			10.0328	10.0328
2019-12-14_21:00:00	2019-12-15 07:00:01	0	6.44	3.15	0.02	0	0	293.7	-1.05	-2.84	20.55	3.02789	20.2904						247																9.9225	4056.42			422.303	577.922			9.1681	9.1681
2019-12-14_22:00:00	2019-12-15 08:00:01	0	6.16	2.92	0	0	0	296.58	0.99	-2.53	23.43	2.7168	338.629						364																8.5264	4085.77			548.965	548.965			7.381	7.381
2019-12-14_23:00:00	2019-12-15 09:00:01	0	6	2.89	0	0	0	298.39	3.67	-1.3	25.24	3.89344	289.505						491																8.3521	4089.6			637.058	637.058			15.1589	15.1589
2019-12-15_00:00:00	2019-12-15 10:00:01	0	5.01	2.44	0	0	0	299.96	5.77	-0.66	26.81	5.80762	276.525						349																5.9536	4147.36			718.776	718.776			33.7285	33.7285
2019-12-15_01:00:00	2019-12-15 11:00:01	0	0	0	0	0	0	299.91	5.76	-0.97	26.76	5.8411	279.559						429																0	4467.59			716.098	716.098			34.1185	34.1185
2019-12-15_02:00:00	2019-12-15 12:00:01	0	0	0	0	0	0	301.31	6.9	-0.41	28.16	6.91217	273.401						356																0	4467.59			792.986	792.986			47.7781	47.7781
2019-12-15_03:00:00	2019-12-15 13:00:01	0	0	0	0	0	0	302.41	7.96	0.55	29.26	7.97898	266.047						448																0	4467.59			856.148	856.148			63.6641	63.6641
2019-12-15_04:00:00	2019-12-15 14:00:01	0	0	0	0	0	0	303.18	8.69	1.24	30.03	8.77802	261.879						424																0	4467.59			901.801	901.801			77.0537	77.0537
2019-12-15_05:00:00	2019-12-15 15:00:01	0	0	0	0	0	0	303.48	9	1.49	30.33	9.12251	260.6						268																0	4467.59			919.909	919.909			83.2201	83.2201
2019-12-15_06:00:00	2019-12-15 16:00:01	0	0	0	0	0	0	303.56	9.27	2.11	30.41	9.5071	257.177						460																0	4467.59			924.768	924.768			90.385	90.385
2019-12-15_07:00:00	2019-12-15 17:00:01	0	0	0	0	0	0	303.15	8.98	2.79	30	9.40343	252.74						281																0	4467.59			900	900			88.4245	88.4245
2019-12-15_08:00:00	2019-12-15 18:00:01	0	0.01	0	0	0	0	302.57	8.09	2.85	29.42	8.57733	250.593						109																0	4467.59			865.536	865.536			73.5706	73.5706
2019-12-15_09:00:00	2019-12-15 19:00:01	0	0.03	0	0	0	0	300.97	5.72	2.63	27.82	6.29566	245.307						71																0	4467.59			773.952	773.952			39.6353	39.6353
2019-12-15_10:00:00	2019-12-15 20:00:01	0	0.05	0	0	0	0	297.45	4.17	1.87	24.3	4.5701	245.847						74																0	4467.59			590.49	590.49			20.8858	20.8858
2019-12-15_11:00:00	2019-12-15 21:00:01	0	0.05	0	0	0	0	295.61	3.77	1.45	22.46	4.03923	248.962						68																0	4467.59			504.452	504.452			16.3154	16.3154
2019-12-15_12:00:00	2019-12-15 22:00:01	0	0.05	0	0	0	0	294.54	4.09	1.01	21.39	4.21286	256.129						56																0	4467.59			457.532	538.24			17.7482	17.7482
2019-12-15_13:00:00	2019-12-15 23:00:01	0	0.1	0	0	0	0	293.05	3.2	2.42	19.9	4.01203	232.902						51																0	4467.59			396.01	609.596			16.0964	16.0964
2019-12-15_14:00:00	2019-12-16 00:00:01	0	0.14	0	0	0	0	290.57	1.42	2.5	17.42	2.87513	209.597						58																0	4467.59			303.456	738.209			8.2664	8.2664
2019-12-15_15:00:00	2019-12-16 01:00:01	0	0.08	0	0	0	0	289.21	-0.2	2.34	16.06	2.34853	175.115						57																0	4467.59			257.924	813.961			5.5156	5.5156
2019-12-15_16:00:00	2019-12-16 02:00:01	0	0.06	0.01	0	0	0	288.33	-0.84	2.12	15.18	2.28035	158.385						64																0.0001	4466.25			230.432	864.948			5.2	5.2
2019-12-15_17:00:00	2019-12-16 03:00:01	0	0.09	0.03	0	0	0	287.58	-0.89	2.05	14.43	2.23486	156.532						76																0.0009	4463.58			208.225	909.626			4.9946	4.9946
2019-12-15_18:00:00	2019-12-16 04:00:01	0	0.14	0.06	0	0	0	286.95	-0.83	2.04	13.8	2.20239	157.86						99																0.0036	4459.57			190.44	948.024			4.8505	4.8505
2019-12-15_19:00:00	2019-12-16 05:00:01	0	0.16	0.07	0	0	0	286.55	-0.55	2.18	13.4	2.24831	165.84						107																0.0049	4458.23			179.56	972.816			5.0549	5.0549
2019-12-15_20:00:00	2019-12-16 06:00:01	0	0.16	0.07	0	0	0	290.15	-0.18	1.87	17	1.87864	174.502						164																0.0049	4458.23			289	761.208			3.5293	5.00577
2019-12-15_21:00:00	2019-12-16 07:00:01	0	0.19	0.07	0	0	0	292.99	0.5	2.69	19.84	2.73607	190.53						405																0.0049	4458.23			393.626	612.562			7.4861	7.4861
2019-12-15_22:00:00	2019-12-16 08:00:01	0	0.19	0.06	0	0	0	294.7	1.52	3.51	21.55	3.82498	203.415						199																0.0036	4459.57			464.403	530.842			14.6305	14.6305
2019-12-15_23:00:00	2019-12-16 09:00:01	0	0.15	0.05	0	0	0	296.54	2.97	4.04	23.39	5.01423	216.321						102																0.0025	4460.9			547.092	547.092			25.1425	25.1425
2019-12-16_00:00:00	2019-12-16 10:00:01	0	0.09	0.03	0	0	0	298.07	4.1	4.62	24.92	6.17692	221.587						97																0.0009	4463.58			621.006	621.006			38.1544	38.1544
2019-12-16_01:00:00	2019-12-16 11:00:01	0	0.08	0.02	0	0	0	299.22	4.44	4.8	26.07	6.53862	222.769						113																0.0004	4464.91			679.645	679.645			42.7536	42.7536
2019-12-16_02:00:00	2019-12-16 12:00:01	0	0.09	0.02	0	0	0	300.43	4.66	4.53	27.28	6.49896	225.81						132																0.0004	4464.91			744.198	744.198			42.2365	42.2365
2019-12-16_03:00:00	2019-12-16 13:00:01	0	0.08	0.02	0	0	0	301.69	4.83	4.93	28.54	6.90172	224.413						278																0.0004	4464.91			814.532	814.532			47.6338	47.6338
2019-12-16_04:00:00	2019-12-16 14:00:01	0	0.09	0.03	0	0	0	302.68	4.67	5.07	29.53	6.89303	222.648						615																0.0009	4463.58			872.021	872.021			47.5138	47.5138
2019-12-16_05:00:00	2019-12-16 15:00:01	0	0.13	0.05	0	0	0	303.61	4.39	5.33	30.46	6.90514	219.476						495																0.0025	4460.9			927.812	927.812			47.681	47.681
2019-12-16_06:00:00	2019-12-16 16:00:01	0	0.23	0.1	0	0	0	304.22	3.99	5.35	31.07	6.67402	216.715						299																0.01	4454.23			965.345	965.345			44.5426	44.5426
2019-12-16_07:00:00	2019-12-16 17:00:01	0	0.34	0.16	0	0	0	304.43	3.33	5.3	31.28	6.25931	212.141						194																0.0256	4446.22			978.438	978.438			39.1789	39.1789
2019-12-16_08:00:00	2019-12-16 18:00:01	0	0.42	0.19	0	0	0	304.22	3.01	4.89	31.07	5.74214	211.614						126																0.0361	4442.22			965.345	965.345			32.9722	32.9722
2019-12-16_09:00:00	2019-12-16 19:00:01	0	0.59	0.25	0	0	0	302.77	2.25	3.21	29.62	3.92003	215.028						110																0.0625	4434.23			877.344	877.344			15.3666	15.3666
2019-12-16_10:00:00	2019-12-16 20:00:01	0	0.83	0.33	0	0	0	298.9	1.81	2.63	25.75	3.19265	214.536						91																0.1089	4423.58			663.062	663.062			10.193	10.193
2019-12-16_11:00:00	2019-12-16 21:00:01	0	17.09	13.59	0.69	0	0	296.82	-2.82	0.29	23.67	2.83487	95.8713						80																184.688	2835.56			560.269	560.269			8.0365	8.0365
2019-12-16_12:00:00	2019-12-16 22:00:01	0	87.38	71.26	3.62	0.01	0	293	-5.5	-2.75	19.85	6.14919	63.4351																						5077.99	5077.99			394.023	612.068			37.8125	37.8125
2019-12-16_13:00:00	2019-12-16 23:00:01	0	68.88	54.85	2.71	0.01	0	291.45	-6.92	-2.76	18.3	7.4501	68.2558						80																3008.52	3008.52			334.89	691.164			55.504	55.504
2019-12-16_14:00:00	2019-12-17 00:00:01	0	52.48	40.07	1.88	0	0	290.24	-6.88	-3.29	17.09	7.62617	64.4431						98																1605.6	1605.6			292.068	756.25			58.1585	58.1585
2019-12-16_15:00:00	2019-12-17 01:00:01	0	35.46	25.06	1.07	0	0	289.3	-6.41	-3.66	16.15	7.38131	60.2745						92																628.004	1745.57			260.823	808.834			54.4837	54.4837
2019-12-16_16:00:00	2019-12-17 02:00:01	0	26.64	17.47	0.67	0	0	288.56	-5.8	-3.42	15.41	6.73323	59.4742						95																305.201	2437.4			237.468	851.472			45.3364	45.3364
2019-12-16_17:00:00	2019-12-17 03:00:01	0	22.63	14.13	0.49	0	0	287.94	-5.45	-2.85	14.79	6.1502	62.3935						92																199.657	2778.34			218.744	888.04			37.825	37.825
2019-12-16_18:00:00	2019-12-17 04:00:01	0	19.86	11.83	0.37	0	0	287.35	-4.73	-2.68	14.2	5.43648	60.4644						113																139.949	3026.1			201.64	923.552			29.5553	29.5553
2019-12-16_19:00:00	2019-12-17 05:00:01	0	17.44	9.87	0.27	0	0	286.79	-3.99	-3.17	13.64	5.09598	51.5335						207																97.4169	3245.58			186.05	957.902			25.969	25.969
2019-12-16_20:00:00	2019-12-17 06:00:01	0	15.27	8.27	0.19	0	0	288.61	-5	-3.66	15.46	6.19642	53.796						159																68.3929	3430.44			239.012	848.557			38.3956	38.3956
2019-12-16_21:00:00	2019-12-17 07:00:01	0	13.47	7.21	0.16	0	0	291.27	-4.31	-3.17	18.12	5.35023	53.6657						130																51.9841	3555.74			328.334	700.661			28.625	28.625
2019-12-16_22:00:00	2019-12-17 08:00:01	0	14.08	8.5	0.24	0	0	294.53	-3.39	-3.01	21.38	4.53345	48.3981						102																72.25	3403.56			457.104	538.704			20.5522	20.5522
2019-12-16_23:00:00	2019-12-17 09:00:01	0	16.87	11.5	0.4	0	0	297.02	-1.93	-2.31	23.87	3.01015	39.8788						131																132.25	3062.52			569.777	569.777			9.061	9.061
2019-12-17_00:00:00	2019-12-17 10:00:01	0	18.18	13.41	0.52	0	0	299.1	-1.11	-1.49	25.95	1.85801	36.685						3818																179.828	2854.76			673.403	673.403			3.4522	5.09852
2019-12-17_01:00:00	2019-12-17 11:00:01	0	14.82	11.07	0.43	0	0	300.87	-0.51	-0.52	27.72	0.728354	44.4439						5574																122.545	3110.29			768.398	768.398			0.5305	11.4761
2019-12-17_02:00:00	2019-12-17 12:00:01	0	12.03	8.94	0.34	0	0	302.65	0.05	0.38	29.5	0.383275	187.496						6455																79.9236	3352.41			870.25	870.25			0.1469	13.9332
2019-12-17_03:00:00	2019-12-17 13:00:01	0	9.68	7.06	0.26	0	0	304.24	0.34	1.5	31.09	1.53805	192.771						5979																49.8436	3573.65			966.588	966.588			2.3656	6.64582
2019-12-17_04:00:00	2019-12-17 14:00:01	0	7.32	5.18	0.18	0	0	305.68	0.36	2.52	32.53	2.54558	188.13						6111																26.8324	3801.96			1058.2	1058.2			6.48	6.48
2019-12-17_05:00:00	2019-12-17 15:00:01	0	6.2	4.3	0.14	0	0	306.69	0.15	3.12	33.54	3.1236	182.752						6029																18.49	3911.25			1124.93	1124.93			9.7569	9.7569
2019-12-17_06:00:00	2019-12-17 16:00:01	0	6.22	4.32	0.14	0	0	307.37	0.08	3.13	34.22	3.13102	181.464						5611																18.6624	3908.75			1171.01	1171.01			9.8033	9.8033
2019-12-17_07:00:00	2019-12-17 17:00:01	0	5.81	4.08	0.14	0	0	307.78	0.11	3.28	34.63	3.28184	181.921						4989																16.6464	3938.82			1199.24	1199.24			10.7705	10.7705
2019-12-17_08:00:00	2019-12-17 18:00:01	0	5.41	3.89	0.14	0	0	307.55	-0.38	3.86	34.4	3.87866	174.378						4416																15.1321	3962.7			1183.36	1183.36			15.044	15.044
2019-12-17_09:00:00	2019-12-17 19:00:01	0	6.42	4.83	0.18	0	0	305.42	-0.95	2.64	32.27	2.80573	160.209						3705																23.3289	3845.24			1041.35	1041.35			7.8721	7.8721
2019-12-17_10:00:00	2019-12-17 20:00:01	0	7.48	6.1	0.25	0	0	301.95	-2.42	2.3	28.8	3.33862	133.544						3050																37.21	3689.35			829.44	829.44			11.1464	11.1464
2019-12-17_11:00:00	2019-12-17 21:00:01	0	10.98	9.05	0.4	0	0	302.25	-5.52	2.34	29.1	5.9955	112.973						2427																81.9025	3339.68			846.81	846.81			35.946	35.946
2019-12-17_12:00:00	2019-12-17 22:00:01	0	96.01	80.72	4.22	0.01	0.01	298.43	-8.55	-2.05	25.28	8.79233	76.5171						1947																6515.72	6515.72			639.078	639.078			77.305	77.305
2019-12-17_13:00:00	2019-12-17 23:00:01	0	108.08	92.16	4.83	0.01	0.01	296.76	-7.77	-2.5	23.61	8.16229	72.1645						1727																8493.47	8493.47			557.432	557.432			66.6229	66.6229
2019-12-17_14:00:00	2019-12-18 00:00:01	0	96.43	82.02	4.23	0.01	0.01	295.35	-6.83	-2.94	22.2	7.43589	66.7105						1384																6727.28	6727.28			492.84	501.312			55.2925	55.2925
2019-12-17_15:00:00	2019-12-18 01:00:01	0	86.66	73.92	3.78	0.01	0.01	294.26	-6.1	-2.77	21.11	6.69947	65.5774						1189																5464.17	5464.17			445.632	551.31			44.8829	44.8829
2019-12-17_16:00:00	2019-12-18 02:00:01	0	74.17	63.45	3.2	0.01	0.01	293.37	-5.24	-2.76	20.22	5.92243	62.2236						1388																4025.9	4025.9			408.848	593.897			35.0752	35.0752
2019-12-17_17:00:00	2019-12-18 03:00:01	0	64.45	55.26	2.75	0.01	0.01	292.47	-4.69	-3.03	19.32	5.58364	57.1354						1160																3053.67	3053.67			373.262	638.573			31.177	31.177
2019-12-17_18:00:00	2019-12-18 04:00:01	0	55.04	47.24	2.31	0.01	0	291.64	-4.29	-2.84	18.49	5.14487	56.4954						1264																2231.62	2231.62			341.88	681.21			26.4697	26.4697
2019-12-17_19:00:00	2019-12-18 05:00:02	0	45.84	39.33	1.9	0	0	291	-4.02	-2.52	17.85	4.74455	57.9179						1880																1546.85	1546.85			318.623	715.028			22.5108	22.5108
2019-12-17_20:00:00	2019-12-18 06:00:02	0	38.53	33	1.57	0	0	292.84	-3.84	-3	19.69	4.87295	52.0014						2154																1089	1145.15			387.696	620.01			23.7456	23.7456
2019-12-17_21:00:00	2019-12-18 07:00:02	0	33.58	28.72	1.36	0	0	295.76	-2.7	-3.71	22.61	4.58847	36.0458						2366																824.838	1453.13			511.212	511.212			21.0541	21.0541
2019-12-17_22:00:00	2019-12-18 08:00:02	0	33.02	28.24	1.33	0	0	298.91	-1.66	-4.07	25.76	4.39551	22.1888						1926																797.498	1489.96			663.578	663.578			19.3205	19.3205
2019-12-17_23:00:00	2019-12-18 09:00:02	0	37.59	32.17	1.51	0	0	301.66	-0.04	-4.27	28.51	4.27019	0.536789						1963																1034.91	1202.01			812.82	812.82			18.2345	18.2345
2019-12-18_00:00:00	2019-12-18 10:00:02	0	37.29	31.77	1.47	0	0	303.87	1.89	-4.18	30.72	4.58743	335.67						2604																1009.33	1229.9			943.718	943.718			21.0445	21.0445
2019-12-18_01:00:00	2019-12-18 11:00:02	0	33.06	28.06	1.27	0	0	305.55	2.66	-3.91	32.4	4.72903	325.772						3648																787.364	1503.89			1049.76	1049.76			22.3637	22.3637
2019-12-18_02:00:00	2019-12-18 12:00:02	0	27.81	23.61	1.06	0	0	306.95	2.95	-3.3	33.8	4.42634	318.205						4068																557.432	1868.83			1142.44	1142.44			19.5925	19.5925
2019-12-18_03:00:00	2019-12-18 13:00:02	0	21.14	17.93	0.79	0	0	308.05	2.98	-2.5	34.9	3.88978	309.994						4587																321.485	2392.19			1218.01	1218.01			15.1304	15.1304
2019-12-18_04:00:00	2019-12-18 14:00:02	0	16.7	14.08	0.61	0	0	309.02	3.02	-1.8	35.87	3.51574	300.796						5556																198.246	2783.62			1286.66	1286.66			12.3604	12.3604
2019-12-18_05:00:00	2019-12-18 15:00:02	0.01	13.76	11.51	0.49	0	0	309.87	3.21	-1.51	36.72	3.54742	295.193						5602																132.48	3061.41			1348.36	1348.36			12.5842	12.5842
2019-12-18_06:00:00	2019-12-18 16:00:02	0.01	11.6	9.62	0.4	0	0	310.42	3.28	-1.32	37.27	3.53565	291.922						4747																92.5444	3274.13			1389.05	1389.05			12.5008	12.5008
2019-12-18_07:00:00	2019-12-18 17:00:02	0.01	11	9.09	0.37	0	0	310.61	3.34	-1.15	37.46	3.53244	288.999						3864																82.6281	3335.06			1403.25	1403.25			12.4781	12.4781
2019-12-18_08:00:00	2019-12-18 18:00:02	0.01	11.01	9.09	0.37	0	0	310.35	3.35	-0.89	37.2	3.46621	284.878						3220																82.6281	3335.06			1383.84	1383.84			12.0146	12.0146
2019-12-18_09:00:00	2019-12-18 19:00:02	0.01	11.32	9.32	0.37	0	0	307.57	2.28	-0.73	34.42	2.39401	287.754						1909																86.8624	3308.55			1184.74	1184.74			5.7313	5.7313
2019-12-18_10:00:00	2019-12-18 20:00:02	0	11.86	9.73	0.38	0	0	304.37	2.15	-1.32	31.22	2.52288	301.548						1867																94.6729	3261.55			974.688	974.688			6.3649	6.3649
2019-12-18_11:00:00	2019-12-18 21:00:02	0	13	10.64	0.42	0	0	302.95	2.17	-2.38	29.8	3.22076	317.643						3543																113.21	3158.44			888.04	888.04			10.3733	10.3733
2019-12-18_12:00:00	2019-12-18 22:00:02	0	15.69	12.82	0.5	0	0	302.22	2.4	-2.97	29.07	3.81849	321.059						3311																164.352	2918.16			845.065	845.065			14.5809	14.5809
2019-12-18_13:00:00	2019-12-18 23:00:02	0	17.61	14.36	0.56	0	0	300.73	1.89	-3.3	27.58	3.80291	330.199						2709																206.21	2754.15			760.656	760.656			14.4621	14.4621
2019-12-18_14:00:00	2019-12-19 00:00:02	0	18.23	14.85	0.57	0	0	299.62	1.09	-4.08	26.47	4.22309	345.042						2287																220.522	2702.96			700.661	700.661			17.8345	17.8345
2019-12-18_15:00:00	2019-12-19 01:00:02	0	19.35	14.98	0.53	0	0	300.38	2.53	-4.73	27.23	5.36412	331.858						2232																224.4	2689.46			741.473	741.473			28.7738	28.7738
2019-12-18_16:00:00	2019-12-19 02:00:02	0	19.49	14.81	0.51	0	0	300.05	2.95	-5.02	26.9	5.82262	329.559						2245																219.336	2707.12			723.61	723.61			33.9029	33.9029
2019-12-18_17:00:00	2019-12-19 03:00:02	0	18.89	14.14	0.47	0	0	299.7	2.77	-5.47	26.55	6.13138	333.142						2205																199.94	2777.29			704.903	704.903			37.5938	37.5938
2019-12-18_18:00:00	2019-12-19 04:00:02	0	19.48	14.54	0.48	0	0	298.53	1.77	-5.37	25.38	5.65418	341.757						2204																211.412	2735.29			644.144	644.144			31.9698	31.9698
2019-12-18_19:00:00	2019-12-19 05:00:02	0	20.83	15.76	0.53	0	0	296.05	0.48	-4.84	22.9	4.86374	354.336						2974																248.378	2609.17			524.41	524.41			23.656	23.656
2019-12-18_20:00:00	2019-12-19 06:00:02	0	21.93	16.66	0.56	0	0	299.24	2.29	-5.47	26.09	5.93001	337.284						3682																277.556	2518.03			680.688	680.688			35.165	35.165
2019-12-18_21:00:00	2019-12-19 07:00:02	0	22.55	17.11	0.58	0	0	302.6	3.31	-4.86	29.45	5.88011	325.742						3962																292.752	2473.07			867.303	867.303			34.5757	34.5757
2019-12-18_22:00:00	2019-12-19 08:00:02	0	22.82	17.16	0.58	0	0	306.01	4.56	-4.22	32.86	6.21305	312.782						3483																294.466	2468.1			1079.78	1079.78			38.602	38.602
2019-12-18_23:00:00	2019-12-19 09:00:02	0	22.69	16.8	0.55	0	0	308.32	7.26	-1.2	35.17	7.35851	279.386						3096																282.24	2504			1236.93	1236.93			54.1476	54.1476
2019-12-19_00:00:00	2019-12-19 10:00:02	0	22.56	16.52	0.53	0	0	309.74	8.22	-0.71	36.59	8.25061	274.937						2826																272.91	2532.1			1338.83	1338.83			68.0725	68.0725
2019-12-19_01:00:00	2019-12-19 11:00:02	0	20.97	15.29	0.49	0	0	310.76	8.97	-0.92	37.61	9.01706	275.856						2892																233.784	2657.4			1414.51	1414.51			81.3073	81.3073
2019-12-19_02:00:00	2019-12-19 12:00:02	0.11	18.81	13.34	0.42	0	0	311.97	8.65	-0.67	38.82	8.67591	274.429						3045																177.956	2862.25			1506.99	1506.99			75.2714	75.2714
2019-12-19_03:00:00	2019-12-19 13:00:02	0.31	17.29	11.43	0.35	0	0	313.02	8.58	-0.22	39.87	8.58282	271.469						2762																130.645	3070.27			1589.62	1589.62			73.6648	73.6648
2019-12-19_04:00:00	2019-12-19 14:00:02	0.69	18.59	10.87	0.32	0	0	313.78	8.61	0.38	40.63	8.61838	267.473						3125																118.157	3132.64			1650.8	1650.8			74.2765	74.2765
2019-12-19_05:00:00	2019-12-19 15:00:02	1.34	21.08	10.48	0.28	0	0	314.3	8.45	0.98	41.15	8.50664	263.385						3744																109.83	3176.45			1693.32	1693.32			72.3629	72.3629
2019-12-19_06:00:00	2019-12-19 16:00:02	1.91	23.3	10.31	0.24	0	0	314.49	8.25	0.87	41.34	8.29575	263.98						3196																106.296	3195.64			1709	1709			68.8194	68.8194
2019-12-19_07:00:00	2019-12-19 17:00:02	2.39	25.62	10.47	0.22	0	0	314.44	8	0.37	41.29	8.00855	267.352						3186																109.621	3177.58			1704.86	1704.86			64.1369	64.1369
2019-12-19_08:00:00	2019-12-19 18:00:02	2.72	26.45	10.19	0.2	0	0	313.8	7.2	1.46	40.65	7.34654	258.537						2419																103.836	3209.22			1652.42	1652.42			53.9716	53.9716
2019-12-19_09:00:00	2019-12-19 19:00:02	2.56	24.21	8.86	0.16	0	0	311.33	3	1.17	38.18	3.22008	248.694						1397																78.4996	3361.68			1457.71	1457.71			10.3689	10.3689
2019-12-19_10:00:00	2019-12-19 20:00:02	3.97	29.33	6.95	0.04	0	0	306.63	1.19	3.51	33.48	3.70624	198.728						1317																48.3025	3586.81			1120.91	1120.91			13.7362	13.7362
2019-12-19_11:00:00	2019-12-19 21:00:02	3.64	28.53	8.5	0.17	0	0	304.99	-1.11	4.6	31.84	4.73203	166.434						1226																72.25	3403.56			1013.79	1013.79			22.3921	22.3921
2019-12-19_12:00:00	2019-12-19 22:00:02	2.51	29.18	13.46	0.52	0	0	302.75	-3.43	2.92	29.6	4.50459	130.408						1203																181.172	2849.42			876.16	876.16			20.2913	20.2913
2019-12-19_13:00:00	2019-12-19 23:00:02	0.82	154.04	132.94	7.25	0.02	0.01	298.7	-7.27	-1.94	25.55	7.52439	75.0589						1148																17673	17673			652.803	652.803			56.6165	56.6165
2019-12-19_14:00:00	2019-12-20 00:00:02	0.6	93.98	79.58	4.21	0.01	0.01	297.21	-6.83	-2.07	24.06	7.13679	73.1394						1056																6332.98	6332.98			578.884	578.884			50.9338	50.9338
2019-12-19_15:00:00	2019-12-20 01:00:02	0.53	67.61	56.13	2.89	0.01	0	296.28	-6.19	-2.18	23.13	6.56266	70.5988						903																3150.58	3150.58			534.997	534.997			43.0685	43.0685
2019-12-19_16:00:00	2019-12-20 02:00:02	0.47	53.06	43.15	2.16	0	0	295.37	-5.78	-1.94	22.22	6.09688	71.4463						732																1861.92	1861.92			493.728	500.417			37.172	37.172
2019-12-19_17:00:00	2019-12-20 03:00:02	0.44	44.43	35.46	1.72	0	0	294.6	-5.7	-1.85	21.45	5.9927	72.0187						630																1257.41	1257.41			460.103	535.46			35.9125	35.9125
2019-12-19_18:00:00	2019-12-20 04:00:02	0.44	38.59	30.17	1.42	0	0	293.81	-4.43	-1.78	20.66	4.77423	68.1096						446																910.229	1344.69			426.836	572.645			22.7933	22.7933
2019-12-19_19:00:00	2019-12-20 05:00:02	0.45	35.18	27.04	1.24	0	0	292.92	-3.87	-1.44	19.77	4.12923	69.5903						504																731.162	1584.04			390.853	616.032			17.0505	17.0505
2019-12-19_20:00:00	2019-12-20 06:00:02	0.48	33.6	25.56	1.15	0	0	295.35	-4.25	-1.85	22.2	4.63519	66.4769						643																653.314	1704.04			492.84	501.312			21.485	21.485
2019-12-19_21:00:00	2019-12-20 07:00:02	0.52	32.57	24.64	1.11	0	0	299.1	-4.03	-1.32	25.95	4.24067	71.8643						579																607.13	1780.84			673.403	673.403			17.9833	17.9833
2019-12-19_22:00:00	2019-12-20 08:00:02	0.6	30.61	22.98	1.03	0	0	303.48	-3.43	-0.75	30.33	3.51104	77.666						483																528.08	1923.7			919.909	919.909			12.3274	12.3274
2019-12-19_23:00:00	2019-12-20 09:00:02	0.5	21.37	16.18	0.73	0	0	307.01	-1.79	-0.7	33.86	1.922	68.6416						584																261.792	2566.44			1146.5	1146.5			3.6941	4.81362
2019-12-20_00:00:00	2019-12-20 10:00:02	0.36	13.97	10.34	0.46	0	0	308.66	-0.79	-0.61	35.51	0.998098	52.3265						23332																106.916	3192.25			1260.96	1260.96			0.9962	9.72131
2019-12-20_01:00:00	2019-12-20 11:00:02	0.69	12.65	7.62	0.31	0	0	310	0.09	-0.25	36.85	0.265707	340.201						38856																58.0644	3507.01			1357.92	1357.92			0.0706	14.8248
2019-12-20_02:00:00	2019-12-20 12:00:02	1.17	14.51	6.75	0.23	0	0	311.25	1.39	-0.33	38.1	1.42864	283.355						35915																45.5625	3610.81			1451.61	1451.61			2.041	7.22193
2019-12-20_03:00:00	2019-12-20 13:00:02	1.91	18.56	6.48	0.16	0	0	312.52	2.41	-0.23	39.37	2.42095	275.452						32254																41.9904	3643.33			1550	1550			5.861	5.861
2019-12-20_04:00:00	2019-12-20 14:00:02	2.8	23.95	7.24	0.14	0	0	313.69	3.43	0.86	40.54	3.53617	255.924						36322																52.4176	3552.16			1643.49	1643.49			12.5045	12.5045
2019-12-20_05:00:00	2019-12-20 15:00:02	3.76	30.14	8.74	0.14	0	0	314.29	3.67	1.57	41.14	3.99172	246.839						37415																76.3876	3375.61			1692.5	1692.5			15.9338	15.9338
2019-12-20_06:00:00	2019-12-20 16:00:02	5.16	38.92	10.72	0.14	0	0	314.54	3.85	1.83	41.39	4.26279	244.577						43284																114.918	3149.45			1713.13	1713.13			18.1714	18.1714
2019-12-20_07:00:00	2019-12-20 17:00:02	5.91	44.42	12.82	0.19	0	0	314.61	3.75	2.4	41.46	4.45225	237.381						41502																164.352	2918.16			1718.93	1718.93			19.8225	19.8225
2019-12-20_08:00:00	2019-12-20 18:00:02	6.23	47.04	13.96	0.22	0	0	314.17	2.28	2.33	41.02	3.25995	224.379						32192																194.882	2796.29			1682.64	1682.64			10.6273	10.6273
2019-12-20_09:00:00	2019-12-20 19:00:02	6.46	48.08	13.9	0.2	0	0	310.89	-0.07	1.82	37.74	1.82135	177.797						22645																193.21	2802.64			1424.31	1424.31			3.3173	5.26544
2019-12-20_10:00:00	2019-12-20 20:00:02	5.86	43.63	12.17	0.16	0	0	307.66	-2.83	1.17	34.51	3.06232	112.461						16630																148.109	2988.81			1190.94	1190.94			9.3778	9.3778
2019-12-20_11:00:00	2019-12-20 21:00:02	1.91	36.04	23.2	1.13	0	0	307.52	-7.35	-1.08	34.37	7.42892	81.641						10402																538.24	1904.45			1181.3	1181.3			55.1889	55.1889
2019-12-20_12:00:00	2019-12-20 22:00:02	0.4	188.83	167.49	9.35	0.02	0.01	302.43	-9.21	-1.92	29.28	9.408	78.2244						4707																28052.9	28052.9			857.318	857.318			88.5105	88.5105
2019-12-20_13:00:00	2019-12-20 23:00:02	0.44	150.4	131.7	7.19	0.02	0.01	301.14	-8.27	-1.8	27.99	8.46362	77.721						4830																17344.9	17344.9			783.44	783.44			71.6329	71.6329
2019-12-20_14:00:00	2019-12-21 00:00:02	0.52	131.17	113.2	6.04	0.01	0.01	299.95	-5.83	-0.56	26.8	5.85683	84.5134						2929																12814.2	12814.2			718.24	718.24			34.3025	34.3025
2019-12-20_15:00:00	2019-12-21 01:00:02	0.6	126.57	108.27	5.68	0.01	0.01	300.25	-5.92	-0.54	27.1	5.94458	84.7883						2521																11722.4	11722.4			734.41	734.41			35.338	35.338
2019-12-20_16:00:00	2019-12-21 02:00:02	0.51	102.77	87.49	4.49	0.01	0.01	300.04	-6.55	0.88	26.89	6.60885	97.6518						1849																7654.5	7654.5			723.072	723.072			43.6769	43.6769
2019-12-20_17:00:00	2019-12-21 03:00:02	0.97	84.45	67.94	3.34	0.01	0.01	300.99	-6.83	-0.88	27.84	6.88646	82.6584						1612																4615.84	4615.84			775.066	775.066			47.4233	47.4233
2019-12-20_18:00:00	2019-12-21 04:00:02	1.21	73.32	55.87	2.62	0.01	0.01	301.02	-5.34	-3.96	27.87	6.6481	53.4405						1674																3121.46	3121.46			776.737	776.737			44.1972	44.1972
2019-12-20_19:00:00	2019-12-21 05:00:02	1.5	66.01	47.36	2.11	0.01	0.01	300.04	-4.02	-5.5	26.89	6.81252	36.1635						2527																2242.97	2242.97			723.072	723.072			46.4104	46.4104
2019-12-20_20:00:00	2019-12-21 06:00:02	1.95	65.19	43.51	1.83	0.01	0.01	301.14	-1.91	-7.38	27.99	7.62316	14.5103						2757																1893.12	1893.12			783.44	783.44			58.1125	58.1125
2019-12-20_21:00:00	2019-12-21 07:00:02	3.15	68.89	40.62	1.58	0	0.01	303.44	-0.35	-5.79	30.29	5.80057	3.45934						3071																1649.98	1649.98			917.484	917.484			33.6466	33.6466
2019-12-20_22:00:00	2019-12-21 08:00:02	4.32	70.87	36.99	1.33	0	0.01	306.59	1.14	-5.56	33.44	5.67567	348.413						3432																1368.26	1368.26			1118.23	1118.23			32.2132	32.2132
2019-12-20_23:00:00	2019-12-21 09:00:02	8.01	85.24	34.96	1.04	0	0	310.46	4.87	-2.98	37.31	5.7094	301.463						3637																1222.2	1222.2			1392.04	1392.04			32.5973	32.5973
2019-12-21_00:00:00	2019-12-21 10:00:02	13.54	110.87	35.72	0.68	0	0	312.2	7.57	-1.12	39.05	7.6524	278.416						4069																1275.92	1275.92			1524.9	1524.9			58.5593	58.5593
2019-12-21_01:00:00	2019-12-21 11:00:02	18.85	142.41	37.25	0.34	0	0	311.57	12.95	4.81	38.42	13.8144	249.624						3895																1387.56	1387.56			1476.1	1476.1			190.839	190.839
2019-12-21_02:00:00	2019-12-21 12:00:02	25.29	176.25	41.5	0.1	0	0	311.1	10.05	2.76	37.95	10.4221	254.644						4730																1722.25	1722.25			1440.2	1440.2			108.62	108.62
2019-12-21_03:00:00	2019-12-21 13:00:02	23.12	156.49	38.06	0.1	0	0	311.93	7.39	0.84	38.78	7.43759	263.515						6361																1448.56	1448.56			1503.89	1503.89			55.3177	55.3177
2019-12-21_04:00:00	2019-12-21 14:00:02	22.47	150.54	36.82	0.1	0	0	312.32	6.72	1.85	39.17	6.97	254.608						9468																1355.71	1355.71			1534.29	1534.29			48.5809	48.5809
2019-12-21_05:00:00	2019-12-21 15:00:02	25.69	169.5	40.7	0.08	0	0	314.12	5.67	0.9	40.97	5.74098	260.981						11181																1656.49	1656.49			1678.54	1678.54			32.9589	32.9589
2019-12-21_06:00:00	2019-12-21 16:00:02	23.41	161.35	38.57	0.11	0	0	311.96	8.78	6.26	38.81	10.7831	234.512						10521																1487.64	1487.64			1506.22	1506.22			116.276	116.276
2019-12-21_07:00:00	2019-12-21 17:00:02	22.76	159.42	38.31	0.13	0	0	312.57	4.15	4.58	39.42	6.18053	222.18						7852																1467.66	1467.66			1553.94	1553.94			38.1989	38.1989
2019-12-21_08:00:00	2019-12-21 18:00:02	23.44	164.2	39.39	0.13	0	0	311.74	2.47	3.12	38.59	3.97936	218.367						4362																1551.57	1551.57			1489.19	1489.19			15.8353	15.8353
2019-12-21_09:00:00	2019-12-21 19:00:02	24.6	171.9	40.9	0.12	0	0	309.74	0.22	2.08	36.59	2.0916	186.038						1594																1672.81	1672.81			1338.83	1338.83			4.3748	4.3748
2019-12-21_10:00:00	2019-12-21 20:00:02	24.76	173.16	41.13	0.11	0	0	307.26	-0.55	-1.77	34.11	1.85348	17.2619						736																1691.68	1691.68			1163.49	1163.49			3.4354	5.11898
2019-12-21_11:00:00	2019-12-21 21:00:02	24.66	173.79	41.21	0.11	0	0	306.1	1.24	-0.95	32.95	1.56208	307.457						716																1698.26	1698.26			1085.7	1085.7			2.4401	6.5225
2019-12-21_12:00:00	2019-12-21 22:00:02	24.88	174.21	41.37	0.11	0	0	305.35	-1.25	2.97	32.2	3.22233	157.175						788																1711.48	1711.48			1036.84	1036.84			10.3834	10.3834
2019-12-21_13:00:00	2019-12-21 23:00:02	23.99	164.83	39.52	0.09	0	0	304.27	-1.72	2.4	31.12	2.95269	144.372						1093																1561.83	1561.83			968.454	968.454			8.7184	8.7184
2019-12-21_14:00:00	2019-12-22 00:00:02	24.18	174.39	46.41	0.45	0	0	303.4	-2.2	-5.65	30.25	6.06321	21.2751						1353																2153.89	2153.89			915.062	915.062			36.7625	36.7625
2019-12-21_15:00:00	2019-12-22 01:00:02	23.66	214.1	84.48	2.61	0.01	0	302.23	-1.46	-6.42	29.08	6.58392	12.8121						1728																7136.87	7136.87			845.646	845.646			43.348	43.348
2019-12-21_16:00:00	2019-12-22 02:00:02	23.49	233.29	102.73	3.59	0.01	0	301.89	-0.55	-5.22	28.74	5.2489	6.0148						849																10553.5	10553.5			825.988	825.988			27.5509	27.5509
2019-12-21_17:00:00	2019-12-22 03:00:02	23.13	267.51	135.19	5.32	0.01	0.01	300.4	0.66	-3.56	27.25	3.62066	349.497						519																18276.3	18276.3			742.562	742.562			13.1092	13.1092
2019-12-21_18:00:00	2019-12-22 04:00:02	23.72	229.98	98.4	3.21	0.01	0	298.66	2.64	1.63	25.51	3.10266	238.308						164																9682.56	9682.56			650.76	650.76			9.6265	9.6265
2019-12-21_19:00:00	2019-12-22 05:00:02	0	24.09	21.22	1.03	0	0	292.11	-5.6	-2.02	18.96	5.95318	70.165						140																450.288	2081.18			359.482	656.897			35.4404	35.4404
2019-12-21_20:00:00	2019-12-22 06:00:02	0	25.26	22.29	1.09	0	0	293.92	-6.29	-2.2	20.77	6.66364	70.7223						154																496.844	1984.7			431.393	567.392			44.4041	44.4041
2019-12-21_21:00:00	2019-12-22 07:00:02	0	23.62	20.86	1.03	0	0	296.16	-6.25	-2.44	23.01	6.7094	68.6745						170																435.14	2114.16			529.46	529.46			45.0161	45.0161
2019-12-21_22:00:00	2019-12-22 08:00:02	0	29.61	26.53	1.32	0	0	299.5	-5.47	-2.4	26.35	5.97335	66.3103						143																703.841	1624.9			694.323	694.323			35.6809	35.6809
2019-12-21_23:00:00	2019-12-22 09:00:02	0	34.25	30.98	1.55	0	0	302.65	-3.6	-1.72	29.5	3.98979	64.4627						144																959.76	1285.94			870.25	870.25			15.9184	15.9184
2019-12-22_00:00:00	2019-12-22 10:00:02	0	26.2	23.85	1.19	0	0	304.8	-1.52	0.16	31.65	1.5284	96.0089						143																568.823	1848.14			1001.72	1001.72			2.336	6.69568
2019-12-22_01:00:00	2019-12-22 11:00:02	0	17.11	15.6	0.77	0	0	306.33	-0.35	1.8	33.18	1.83371	168.996						131																243.36	2625.54			1100.91	1100.91			3.3625	5.20884
2019-12-22_02:00:00	2019-12-22 12:00:02	0	11.33	10.33	0.51	0	0	307.63	0.64	2.77	34.48	2.84297	193.01						125																106.709	3193.38			1188.87	1188.87			8.0825	8.0825
2019-12-22_03:00:00	2019-12-22 13:00:02	0	9.19	8.38	0.41	0	0	308.7	1.95	3.18	35.55	3.73027	211.517						110																70.2244	3417.57			1263.8	1263.8			13.9149	13.9149
2019-12-22_04:00:00	2019-12-22 14:00:02	0	7.88	7.2	0.35	0	0	309.53	2.83	3.44	36.38	4.45449	219.443						124																51.84	3556.93			1323.5	1323.5			19.8425	19.8425
2019-12-22_05:00:00	2019-12-22 15:00:02	0	5.49	5.02	0.24	0	0	310.15	3.58	3.83	37	5.24264	223.068						166																25.2004	3821.71			1369	1369			27.4853	27.4853
2019-12-22_06:00:00	2019-12-22 16:00:02	0	3.77	3.45	0.16	0	0	310.37	3.76	4.15	37.22	5.60001	222.177						126																11.9025	4018.29			1385.33	1385.33			31.3601	31.3601
2019-12-22_07:00:00	2019-12-22 17:00:02	0	3.35	3.08	0.15	0	0	310.18	3.64	4.36	37.03	5.67972	219.857						247																9.4864	4065.34			1371.22	1371.22			32.2592	32.2592
2019-12-22_08:00:00	2019-12-22 18:00:02	0	3.78	3.49	0.17	0	0	309.58	3.46	4.57	36.43	5.73206	217.13						2985																12.1801	4013.22			1327.14	1327.14			32.8565	32.8565
2019-12-22_09:00:00	2019-12-22 19:00:02	0	3.96	3.64	0.17	0	0	307.43	2.3	3.37	34.28	4.08006	214.313						7317																13.2496	3994.24			1175.12	1175.12			16.6469	16.6469
2019-12-22_10:00:00	2019-12-22 20:00:02	0	2.4	2.14	0.1	0	0	302.75	1.79	2.87	29.6	3.38245	211.951						10252																4.5796	4186.09			876.16	876.16			11.441	11.441
2019-12-22_11:00:00	2019-12-22 21:00:02	0	13.73	9.98	0.41	0	0	298.23	-9.2	-2.59	25.08	9.55762	74.2771						12161																99.6004	3233.06			629.006	629.006			91.3481	91.3481
2019-12-22_12:00:00	2019-12-22 22:00:02	0	13.04	9.32	0.36	0	0	295.47	-9.55	-2.51	22.32	9.87434	75.2743						10559																86.8624	3308.55			498.182	498.182			97.5026	97.5026
2019-12-22_13:00:00	2019-12-22 23:00:02	0	10.97	7.69	0.28	0	0	294.24	-9.32	-2.38	21.09	9.61909	75.675						8517																59.1361	3498.72			444.788	552.25			92.5268	92.5268
2019-12-22_14:00:00	2019-12-23 00:00:02	0	8.76	6.07	0.21	0	0	293.26	-9.16	-2.77	20.11	9.56967	73.1747																						36.8449	3692.99			404.412	599.27			91.5785	91.5785
2019-12-22_15:00:00	2019-12-23 01:00:02	0	7.76	5.43	0.18	0	0	292.73	-8.81	-3.23	19.58	9.38344	69.8657																						29.4849	3771.19			383.376	625.5			88.049	88.049
2019-12-22_16:00:00	2019-12-23 02:00:02	0	7.55	5.19	0.16	0	0	292.23	-7.79	-3.79	19.08	8.66304	64.0562																						26.9361	3800.72			364.046	650.76			75.0482	75.0482
2019-12-22_17:00:00	2019-12-23 03:00:02	0	7.88	5.3	0.15	0	0	291.42	-7.06	-3.82	18.27	8.0272	61.5833																						28.09	3787.17			333.793	692.742			64.436	64.436
2019-12-22_18:00:00	2019-12-23 04:00:02	0	8.74	5.92	0.17	0	0	290.72	-6.51	-3.45	17.57	7.36767	62.0786																						35.0464	3711.25			308.705	730.08			54.2826	54.2826
2019-12-22_19:00:00	2019-12-23 05:00:02	0	9.7	6.76	0.2	0	0	290.29	-6.14	-2.79	17.14	6.74416	65.5632																						45.6976	3609.61			293.78	753.502			45.4837	45.4837
2019-12-22_20:00:00	2019-12-23 06:00:02	0	10.64	7.67	0.24	0	0	291.84	-6.24	-3.56	18.69	7.18409	60.2948																						58.8289	3501.09			349.316	670.81			51.6112	51.6112
2019-12-22_21:00:00	2019-12-23 07:00:02	0	12.55	9.57	0.33	0	0	294.34	-5.15	-3.21	21.19	6.06849	58.0648																						91.5849	3279.85			449.016	547.56			36.8266	36.8266
2019-12-22_22:00:00	2019-12-23 08:00:02	0	17.05	13.86	0.53	0	0	298.26	-3.46	-3.31	25.11	4.78829	46.2694																						192.1	2806.88			630.512	630.512			22.9277	22.9277
2019-12-22_23:00:00	2019-12-23 09:00:02	0	22.28	18.6	0.75	0	0	301.68	-1.84	-3.94	28.53	4.34847	25.0329																						345.96	2327.1			813.961	813.961			18.9092	18.9092
2019-12-23_00:00:00	2019-12-23 10:00:02	0	24.83	20.96	0.86	0	0	304.56	-0.58	-3.87	31.41	3.91322	8.52361																						439.322	2104.97			986.588	986.588			15.3133	15.3133
2019-12-23_01:00:00	2019-12-23 11:00:02	0	19.63	16.73	0.7	0	0	306.93	0.45	-3.22	33.78	3.25129	352.044																						279.893	2511.01			1141.09	1141.09			10.5709	10.5709
2019-12-23_02:00:00	2019-12-23 12:00:02	0	10.44	8.85	0.37	0	0	308.55	2.05	-1.48	35.4	2.52842	305.827																						78.3225	3362.84			1253.16	1253.16			6.3929	6.3929
2019-12-23_03:00:00	2019-12-23 13:00:02	0.01	7.8	6.52	0.27	0	0	309.59	3.04	-0.06	36.44	3.04059	271.131																						42.5104	3638.5			1327.87	1327.87			9.2452	9.2452
2019-12-23_04:00:00	2019-12-23 14:00:02	0.02	6.62	5.43	0.22	0	0	310.31	3.11	0.02	37.16	3.11006	269.632																						29.4849	3771.19			1380.87	1380.87			9.6725	9.6725
2019-12-23_05:00:00	2019-12-23 15:00:02	0.05	6.19	4.92	0.19	0	0	310.96	2.69	-0.32	37.81	2.70897	276.784																						24.2064	3834.09			1429.6	1429.6			7.3385	7.3385
2019-12-23_06:00:00	2019-12-23 16:00:02	0.13	6.07	4.53	0.17	0	0	311.48	3.6	-0.07	38.33	3.60068	271.114																						20.5209	3882.54			1469.19	1469.19			12.9649	12.9649
2019-12-23_07:00:00	2019-12-23 17:00:02	0.82	10.33	5.26	0.16	0	0	308.2	7.54	-2.77	35.05	8.03271	290.172																						27.6676	3792.1			1228.5	1228.5			64.5245	64.5245
2019-12-23_08:00:00	2019-12-23 18:00:02	2.22	18.83	6.33	0.12	0	0	307.38	4.05	3.93	34.23	5.64335	225.861																						40.0689	3661.46			1171.69	1171.69			31.8474	31.8474
2019-12-23_09:00:00	2019-12-23 19:00:02	1.35	13.93	5.89	0.15	0	0	305.41	-2.31	4.05	32.26	4.66247	150.301																						34.6921	3714.9			1040.71	1040.71			21.7386	21.7386
2019-12-23_10:00:00	2019-12-23 20:00:02	0.91	10.94	5.32	0.15	0	0	302.91	-3.02	-0.66	29.76	3.09128	77.6724																						28.3024	3784.71			885.658	885.658			9.556	9.556
2019-12-23_11:00:00	2019-12-23 21:00:02	0.14	119.68	104.41	5.74	0.01	0.01	300.85	-7.31	-1.58	27.7	7.4788	77.8037																						10901.4	10901.4			767.29	767.29			55.9325	55.9325
2019-12-23_12:00:00	2019-12-23 22:00:02	0.01	133.11	115.24	6.25	0.01	0.01	298.31	-8.67	-2.32	25.16	8.97504	75.0194																						13280.3	13280.3			633.026	633.026			80.5513	80.5513
2019-12-23_13:00:00	2019-12-23 23:00:02	0	110.89	94.7	5.01	0.01	0.01	296.7	-8.71	-3.79	23.55	9.49885	66.4847																						8968.09	8968.09			554.603	554.603			90.2282	90.2282
2019-12-23_14:00:00	2019-12-24 00:00:02	0	87.33	73.01	3.73	0.01	0.01	296.01	-7.5	-3.79	22.86	8.40322	63.1911																						5330.46	5330.46			522.58	522.58			70.6141	70.6141
2019-12-23_15:00:00	2019-12-24 01:00:02	0	69.88	56.93	2.78	0.01	0.01	295.5	-5.9	-3.6	22.35	6.91158	58.6099																						3241.02	3241.02			499.523	499.523			47.77	47.77
2019-12-23_16:00:00	2019-12-24 02:00:02	0	59.99	48.19	2.26	0.01	0.01	295.16	-5.2	-3.44	22.01	6.23487	56.514																						2322.28	2322.28			484.44	509.856			38.8736	38.8736
2019-12-23_17:00:00	2019-12-24 03:00:02	0	53.09	42.62	1.95	0.01	0.01	294.76	-4.46	-3.72	21.61	5.80775	50.1693																						1816.46	1816.46			466.992	528.08			33.73	33.73
2019-12-23_18:00:00	2019-12-24 04:00:02	0	42.91	33.91	1.47	0	0.01	294.17	-4.57	-2.96	21.02	5.44486	57.0689																						1149.89	1149.89			441.84	555.545			29.6465	29.6465
2019-12-23_19:00:00	2019-12-24 05:00:02	0	45.76	41.29	2.13	0.01	0.01	292.16	-6.76	-3.16	19.01	7.46212	64.9461																						1704.86	1704.86			361.38	654.336			55.6832	55.6832
2019-12-23_20:00:00	2019-12-24 06:00:02	0	37.41	33.52	1.7	0	0.01	292.64	-6.78	-2.99	19.49	7.41003	66.2025																						1123.59	1123.59			379.86	630.01			54.9085	54.9085
2019-12-23_21:00:00	2019-12-24 07:00:02	0	31.55	28.08	1.41	0	0.01	294.95	-6.04	-1.88	21.8	6.32582	72.711																						788.486	1502.34			475.24	519.384			40.016	40.016
2019-12-23_22:00:00	2019-12-24 08:00:02	0	25.63	22.69	1.13	0	0	297.62	-4.74	-2.2	24.47	5.22567	65.1025																						514.836	1949.22			598.781	598.781			27.3076	27.3076
2019-12-23_23:00:00	2019-12-24 09:00:02	0	20.37	17.93	0.89	0	0	299.84	-3.23	-1.91	26.69	3.75247	59.403																						321.485	2392.19			712.356	712.356			14.081	14.081
2019-12-24_00:00:00	2019-12-24 10:00:02	0	15.12	13.3	0.65	0	0	301.83	-2.12	-0.4	28.68	2.15741	79.3152																						176.89	2866.53			822.542	822.542			4.6544	4.6544
2019-12-24_01:00:00	2019-12-24 11:00:02	0	11.54	10.19	0.5	0	0	303.68	-1.99	0.97	30.53	2.21382	115.986																						103.836	3209.22			932.081	932.081			4.901	4.901
2019-12-24_02:00:00	2019-12-24 12:00:02	0	9.98	8.85	0.43	0	0	305.04	-1.5	1.85	31.89	2.3817	140.964																						78.3225	3362.84			1016.97	1016.97			5.6725	5.6725
2019-12-24_03:00:00	2019-12-24 13:00:02	0	9.73	8.71	0.42	0	0	306.22	-0.64	2.94	33.07	3.00885	167.719																						75.8641	3379.1			1093.62	1093.62			9.0532	9.0532
2019-12-24_04:00:00	2019-12-24 14:00:02	0	10.3	9.32	0.45	0	0	307.13	0.33	3.8	33.98	3.8143	184.963																						86.8624	3308.55			1154.64	1154.64			14.5489	14.5489
2019-12-24_05:00:00	2019-12-24 15:00:02	0	10.57	9.65	0.46	0	0	307.8	1.18	3.85	34.65	4.02677	197.04																						93.1225	3270.7			1200.62	1200.62			16.2149	16.2149
2019-12-24_06:00:00	2019-12-24 16:00:02	0	6.12	5.59	0.27	0	0	308.27	2.16	4.76	35.12	5.22716	204.408																						31.2481	3751.56			1233.41	1233.41			27.3232	27.3232
2019-12-24_07:00:00	2019-12-24 17:00:02	0	1.57	1.42	0.07	0	0	308.14	1.99	5.03	34.99	5.40934	201.585																						2.0164	4279.78			1224.3	1224.3			29.261	29.261
2019-12-24_08:00:00	2019-12-24 18:00:02	0	0.83	0.76	0.04	0	0	307.61	0.99	5.12	34.46	5.21483	190.944																						0.5776	4366.57			1187.49	1187.49			27.1945	27.1945
2019-12-24_09:00:00	2019-12-24 19:00:02	0	11	6.56	0.23	0	0	303.92	-7.04	0.76	30.77	7.0809	96.1613																						43.0336	3633.68			946.793	946.793			50.1392	50.1392
2019-12-24_10:00:00	2019-12-24 20:00:02	0	10.7	4.52	0.06	0	0	299.18	-9.71	-0.44	26.03	9.71996	87.4056																						20.4304	3883.78			677.561	677.561			94.4777	94.4777
2019-12-24_11:00:00	2019-12-24 21:00:02	0	9.7	4.32	0.06	0	0	296.63	-10.07	-1.91	23.48	10.2495	79.2603																						18.6624	3908.75			551.31	551.31			105.053	105.053
2019-12-24_12:00:00	2019-12-24 22:00:02	0	10.75	4.97	0.08	0	0	295.32	-9.57	-2.25	22.17	9.83094	76.7696																						24.7009	3827.9			491.509	502.656			96.6474	96.6474
2019-12-24_13:00:00	2019-12-24 23:00:02	0	13.07	5.69	0.07	0	0	294.55	-8.73	-2.75	21.4	9.15289	72.5154																						32.3761	3739.32			457.96	537.776			83.7754	83.7754
2019-12-24_14:00:00	2019-12-25 00:00:02	0	15.02	6.19	0.05	0	0	293.59	-7.49	-2.73	20.44	7.97201	69.974																						38.3161	3678.42			417.794	583.223			63.553	63.553
2019-12-24_15:00:00	2019-12-25 01:00:02	0	16.71	6.66	0.04	0	0	292.63	-6.51	-2.52	19.48	6.98072	68.8389																						44.3556	3621.63			379.47	630.512			48.7305	48.7305
2019-12-24_16:00:00	2019-12-25 02:00:02	0	18.48	7.11	0.03	0	0	291.88	-5.51	-2.01	18.73	5.86517	69.9586																						50.5521	3567.67			350.813	668.74			34.4002	34.4002
2019-12-24_17:00:00	2019-12-25 03:00:02	0	20.44	7.59	0.02	0	0	291.43	-5.53	-1.84	18.28	5.82808	71.5963																						57.6081	3510.56			334.158	692.216			33.9665	33.9665
2019-12-24_18:00:00	2019-12-25 04:00:02	0	21.71	7.89	0.01	0	0	291.05	-5.77	-1.73	17.9	6.02377	73.31																						62.2521	3475.1			320.41	712.356			36.2858	36.2858
2019-12-24_19:00:00	2019-12-25 05:00:02	0	21.21	7.77	0.01	0	0	290.63	-5.81	-1.59	17.48	6.02364	74.695																						60.3729	3489.26			305.55	734.952			36.2842	36.2842
2019-12-24_20:00:00	2019-12-25 06:00:02	0	19.96	7.46	0.01	0	0	291.99	-6.87	-2.21	18.84	7.21672	72.1678																						55.6516	3525.98			354.946	663.062			52.081	52.081
2019-12-24_21:00:00	2019-12-25 07:00:02	0	19.15	7.44	0.02	0	0	294.08	-6.83	-2.52	20.93	7.28006	69.7481																						55.3536	3528.36			438.065	559.796			52.9993	52.9993
2019-12-24_22:00:00	2019-12-25 08:00:02	0	18.67	7.62	0.04	0	0	296.49	-5.97	-2.72	23.34	6.56043	65.5056																						58.0644	3507.01			544.756	544.756			43.0393	43.0393
2019-12-24_23:00:00	2019-12-25 09:00:02	0	17.29	7.71	0.08	0	0	298.71	-4.64	-2.67	25.56	5.35336	60.0827																						59.4441	3496.36			653.314	653.314			28.6585	28.6585
2019-12-25_00:00:00	2019-12-25 10:00:02	0	15.41	7.58	0.12	0	0	300.55	-3.07	-2.04	27.4	3.68599	56.3963																						57.4564	3511.75			750.76	750.76			13.5865	13.5865
2019-12-25_01:00:00	2019-12-25 11:00:02	0	13.97	7.99	0.2	0	0	301.94	-1.6	-1.06	28.79	1.91927	56.4757																						63.8401	3463.32			828.864	828.864			3.6836	4.82562
2019-12-25_02:00:00	2019-12-25 12:00:02	0	14.03	8.72	0.26	0	0	303.13	-0.95	-0.25	29.98	0.982344	75.2566																						76.0384	3377.93			898.8	898.8			0.965	9.8198
2019-12-25_03:00:00	2019-12-25 13:00:02	0	13.23	8.42	0.26	0	0	304.29	-0.4	0.47	31.14	0.617171	139.6																						70.8964	3412.9			969.7	969.7			0.3809	12.2418
2019-12-25_04:00:00	2019-12-25 14:00:02	0	11.75	7.51	0.23	0	0	305.39	0	1.23	32.24	1.23	180																						56.4001	3520.05			1039.42	1039.42			1.5129	8.329
2019-12-25_05:00:00	2019-12-25 15:00:02	0	11.26	7.21	0.22	0	0	306.31	-0.07	2.09	33.16	2.09117	178.082																						51.9841	3555.74			1099.59	1099.59			4.373	4.373
2019-12-25_06:00:00	2019-12-25 16:00:02	0	10.79	6.95	0.21	0	0	306.91	-0.55	2.94	33.76	2.991	169.404																						48.3025	3586.81			1139.74	1139.74			8.9461	8.9461
2019-12-25_07:00:00	2019-12-25 17:00:02	0	10.18	6.6	0.2	0	0	307.09	-1.28	3.15	33.94	3.40013	157.886																						43.56	3628.86			1151.92	1151.92			11.5609	11.5609
2019-12-25_08:00:00	2019-12-25 18:00:02	0	9.84	6.42	0.19	0	0	306.82	-1.83	2.51	33.67	3.10628	143.905																						41.2164	3650.58			1133.67	1133.67			9.649	9.649
2019-12-25_09:00:00	2019-12-25 19:00:02	0	9.74	6.42	0.19	0	0	305.45	-1.93	0.95	32.3	2.15114	116.208																						41.2164	3650.58			1043.29	1043.29			4.6274	4.6274
2019-12-25_10:00:00	2019-12-25 20:00:02	0	9.18	6.18	0.19	0	0	301.88	-3.42	0.49	28.73	3.45492	98.1534																						38.1924	3679.64			825.413	825.413			11.9365	11.9365
2019-12-25_11:00:00	2019-12-25 21:00:02	0	12.42	8.46	0.3	0	0	301.32	-4.99	0.69	28.17	5.03748	97.8726																						71.5716	3408.22			793.549	793.549			25.3762	25.3762
2019-12-25_12:00:00	2019-12-25 22:00:02	0	68.14	52.35	2.63	0.01	0.01	299.07	-8.19	-4.99	25.92	9.59042	58.647																						2740.52	2740.52			671.846	671.846			91.9762	91.9762
2019-12-25_13:00:00	2019-12-25 23:00:02	0	65.28	49.93	2.49	0.01	0.01	296.99	-6.03	-2.05	23.84	6.36894	71.2238																						2493	2493			568.346	568.346			40.5634	40.5634
2019-12-25_14:00:00	2019-12-26 00:00:02	0	57.49	43.6	2.13	0.01	0	295.51	-5.72	-2.36	22.36	6.18773	67.5797																						1900.96	1900.96			499.97	499.97			38.288	38.288
2019-12-25_15:00:00	2019-12-26 01:00:02	0	47.83	35.35	1.66	0	0	294.18	-5.9	-2.45	21.03	6.38847	67.4493																						1249.62	1249.62			442.261	555.074			40.8125	40.8125
2019-12-25_16:00:00	2019-12-26 02:00:02	0	40.08	28.9	1.3	0	0	293.14	-5.65	-2.24	19.99	6.07784	68.3738																						835.21	1439.44			399.6	605.16			36.9401	36.9401
2019-12-25_17:00:00	2019-12-26 03:00:02	0	33	23.1	0.98	0	0	292.41	-5.27	-2.3	19.26	5.75003	66.4221																						533.61	1913.19			370.948	641.609			33.0629	33.0629
2019-12-25_18:00:00	2019-12-26 04:00:02	0	26.58	17.85	0.69	0	0	291.85	-5.25	-2.25	18.7	5.71183	66.8015																						318.623	2400.02			349.69	670.292			32.625	32.625
2019-12-25_19:00:00	2019-12-26 05:00:02	0	22.28	14.41	0.51	0	0	291.26	-4.86	-2.23	18.11	5.3472	65.3522																						207.648	2748.9			327.972	701.19			28.5925	28.5925
2019-12-25_20:00:00	2019-12-26 06:00:02	0	19.46	12.35	0.41	0	0	292.64	-4.84	-3.32	19.49	5.86924	55.5519																						152.522	2969.16			379.86	630.01			34.448	34.448
2019-12-25_21:00:00	2019-12-26 07:00:02	0	16.6	10.26	0.32	0	0	295.55	-3.6	-4.48	22.4	5.74721	38.7845																						105.268	3201.3			501.76	501.76			33.0304	33.0304
2019-12-25_22:00:00	2019-12-26 08:00:02	0	15.2	8.17	0.2	0	0	298.17	-1.39	-5.4	25.02	5.57603	14.4351																						66.7489	3442.17			626	626			31.0921	31.0921
2019-12-25_23:00:00	2019-12-26 09:00:02	0	13.26	6.42	0.12	0	0	300.19	0.49	-4.76	27.04	4.78515	354.123																						41.2164	3650.58			731.162	731.162			22.8977	22.8977
2019-12-26_00:00:00	2019-12-26 10:00:02	0	11.6	5.65	0.11	0	0	302.05	1.88	-3.74	28.9	4.18593	333.313																						31.9225	3744.22			835.21	835.21			17.522	17.522
2019-12-26_01:00:00	2019-12-26 11:00:02	0	12.05	6.57	0.17	0	0	303.54	2.55	-2.42	30.39	3.51552	313.502																						43.1649	3632.47			923.552	923.552			12.3589	12.3589
2019-12-26_02:00:00	2019-12-26 12:00:02	0	13.5	8.36	0.26	0	0	304.93	2.79	-1.27	31.78	3.06545	294.475																						69.8896	3419.91			1009.97	1009.97			9.397	9.397
2019-12-26_03:00:00	2019-12-26 13:00:02	0	12.55	8.02	0.25	0	0	306.06	2.71	-0.36	32.91	2.73381	277.567																						64.3204	3459.79			1083.07	1083.07			7.4737	7.4737
2019-12-26_04:00:00	2019-12-26 14:00:02	0	11.21	7.2	0.22	0	0	307.03	2.46	0.17	33.88	2.46587	266.047																						51.84	3556.93			1147.85	1147.85			6.0805	6.0805
2019-12-26_05:00:00	2019-12-26 15:00:02	0	10.89	7.04	0.22	0	0	307.79	1.83	0.27	34.64	1.84981	261.607																						49.5616	3576.04			1199.93	1199.93			3.4218	5.13561
2019-12-26_06:00:00	2019-12-26 16:00:03	0	11.06	7.21	0.22	0	0	308.44	1.61	0.51	35.29	1.68885	252.423																						51.9841	3555.74			1245.38	1245.38			2.8522	5.89108
2019-12-26_07:00:00	2019-12-26 17:00:03	0	10.89	7.15	0.22	0	0	308.71	1.98	1.36	35.56	2.40208	235.516																						51.1225	3562.9			1264.51	1264.51			5.77	5.77
2019-12-26_08:00:00	2019-12-26 18:00:03	0	10.59	6.99	0.22	0	0	306.49	0.67	0.91	33.34	1.13004	216.363																						48.8601	3582.02			1111.56	1111.56			1.277	8.91593
2019-12-26_09:00:00	2019-12-26 19:00:03	0	10.38	6.86	0.21	0	0	306.55	-0.97	-0.2	33.4	0.990404	78.3498																						47.0596	3597.6			1115.56	1115.56			0.9809	9.76935
2019-12-26_10:00:00	2019-12-26 20:00:03	0	10.09	6.66	0.2	0	0	303.09	-0.42	-2.96	29.94	2.98965	8.07598																						44.3556	3621.63			896.404	896.404			8.938	8.938
2019-12-26_11:00:00	2019-12-26 21:00:03	0	9.35	6.14	0.18	0	0	301.57	1.43	-2.98	28.42	3.30534	334.365																						37.6996	3684.49			807.696	807.696			10.9253	10.9253
2019-12-26_12:00:00	2019-12-26 22:00:03	0	9.61	6.33	0.18	0	0	300.05	-1.81	-2.83	26.9	3.35932	32.6021																						40.0689	3661.46			723.61	723.61			11.285	11.285
2019-12-26_13:00:00	2019-12-26 23:00:03	0	32.43	26.58	1.3	0	0	299.93	-4.17	-0.6	26.78	4.21294	81.8123																						706.496	1620.87			717.168	717.168			17.7489	17.7489
2019-12-26_14:00:00	2019-12-27 00:00:03	0	56.81	48.78	2.48	0.01	0.01	298.54	-5.39	-2.12	25.39	5.79193	68.5294																						2379.49	2379.49			644.652	644.652			33.5465	33.5465
2019-12-26_15:00:00	2019-12-27 01:00:03	0	88.71	78.11	4.05	0.01	0.01	297.79	-5.23	-3.99	24.64	6.57822	52.6599																						6101.17	6101.17			607.13	607.13			43.273	43.273
2019-12-26_16:00:00	2019-12-27 02:00:03	0	103.58	91.63	4.74	0.01	0.01	296.48	-4.58	-3.54	23.33	5.78861	52.2988																						8396.06	8396.06			544.289	544.289			33.508	33.508
2019-12-26_17:00:00	2019-12-27 03:00:03	0	88.24	77.5	3.96	0.01	0.01	295.21	-4.68	-3.51	22.06	5.85	53.1302																						6006.25	6006.25			486.644	507.601			34.2225	34.2225
2019-12-26_18:00:00	2019-12-27 04:00:03	0	74	64.6	3.23	0.01	0.01	294.31	-4.45	-3.89	21.16	5.91055	48.8415																						4173.16	4173.16			447.746	548.965			34.9346	34.9346
2019-12-26_19:00:00	2019-12-27 05:00:03	0	59.22	51.29	2.49	0.01	0.01	293.61	-4.09	-4.2	20.46	5.86243	44.2399																						2630.66	2630.66			418.612	582.257			34.3681	34.3681
2019-12-26_20:00:00	2019-12-27 06:00:03	0	43.8	37.45	1.75	0	0.01	294.95	-3.55	-5.46	21.8	6.51261	33.0313																						1402.5	1402.5			475.24	519.384			42.4141	42.4141
2019-12-26_21:00:00	2019-12-27 07:00:03	0	30.24	25.02	1.11	0	0	297.76	-2.27	-8.39	24.61	8.69166	15.1396																						626	1748.91			605.652	605.652			75.545	75.545
2019-12-26_22:00:00	2019-12-27 08:00:03	0	21.86	16.62	0.67	0	0	299.94	-0.25	-8.87	26.79	8.87352	1.61453																						276.224	2522.05			717.704	717.704			78.7394	78.7394
2019-12-26_23:00:00	2019-12-27 09:00:03	0	17.37	12.11	0.43	0	0	302.28	0.98	-8.31	29.13	8.36759	353.274																						146.652	2995.37			848.557	848.557			70.0165	70.0165
2019-12-27_00:00:00	2019-12-27 10:00:03	0	16.43	11.34	0.39	0	0	304.44	2.45	-7.21	31.29	7.61489	341.232																						128.596	3080.25			979.064	979.064			57.9866	57.9866
2019-12-27_01:00:00	2019-12-27 11:00:03	0	14.96	9.93	0.31	0	0	306.12	3.47	-5.76	32.97	6.72447	328.934																						98.6049	3238.75			1087.02	1087.02			45.2185	45.2185
2019-12-27_02:00:00	2019-12-27 12:00:03	0	13.48	8.62	0.24	0	0	307.52	3.82	-4.24	34.37	5.70701	317.983																						74.3044	3389.57			1181.3	1181.3			32.57	32.57
2019-12-27_03:00:00	2019-12-27 13:00:03	0	11.46	7.25	0.19	0	0	308.72	3.83	-2.99	35.57	4.85891	307.978																						52.5625	3550.97			1265.22	1265.22			23.609	23.609
2019-12-27_04:00:00	2019-12-27 14:00:03	0	10.48	6.67	0.17	0	0	308.33	3.64	-1.84	35.18	4.07863	296.816																						44.4889	3620.43			1237.63	1237.63			16.6352	16.6352
2019-12-27_05:00:00	2019-12-27 15:00:03	0	10.03	6.42	0.17	0	0	309.49	2.78	-2.28	36.34	3.59539	309.357																						41.2164	3650.58			1320.6	1320.6			12.9268	12.9268
2019-12-27_06:00:00	2019-12-27 16:00:03	0	9.86	6.39	0.17	0	0	307.59	3.48	0.51	34.44	3.51717	261.663																						40.8321	3654.2			1186.11	1186.11			12.3705	12.3705
2019-12-27_07:00:00	2019-12-27 17:00:03	0	9.74	6.38	0.17	0	0	307.37	1.4	-1.69	34.22	2.19456	320.362																						40.7044	3655.41			1171.01	1171.01			4.8161	4.8161
2019-12-27_08:00:00	2019-12-27 18:00:03	0	9.62	6.41	0.17	0	0	306.34	1.1	-3.05	33.19	3.2423	340.168																						41.0881	3651.78			1101.58	1101.58			10.5125	10.5125
2019-12-27_09:00:00	2019-12-27 19:00:03	0	9.56	6.34	0.17	0	0	305.37	-1.31	-3.96	32.22	4.17106	18.3047																						40.1956	3660.25			1038.13	1038.13			17.3977	17.3977
2019-12-27_10:00:00	2019-12-27 20:00:03	0	9.52	6.21	0.16	0	0	302.66	-0.17	-3.34	29.51	3.34432	2.91382																						38.5641	3676			870.84	870.84			11.1845	11.1845
2019-12-27_11:00:00	2019-12-27 21:00:03	0	9.46	6.08	0.15	0	0	301.76	0.21	-3.39	28.61	3.3965	356.455																						36.9664	3691.78			818.532	818.532			11.5362	11.5362
2019-12-27_12:00:00	2019-12-27 22:00:03	0	9.42	5.93	0.14	0	0	301.45	0.46	-3.54	28.3	3.56976	352.596																						35.1649	3710.03			800.89	800.89			12.7432	12.7432
2019-12-27_13:00:00	2019-12-27 23:00:03	0	9.54	5.84	0.13	0	0	300.56	0.27	-3.56	27.41	3.57022	355.663																						34.1056	3721			751.308	751.308			12.7465	12.7465
2019-12-27_14:00:00	2019-12-28 00:00:03	0	12.49	8.61	0.27	0	0	299.31	-4.73	-1.75	26.16	5.04335	69.6967																						74.1321	3390.73			684.346	684.346			25.4354	25.4354
2019-12-27_15:00:00	2019-12-28 01:00:03	0	38.44	33.24	1.58	0	0	298.18	-3.31	-1.77	25.03	3.75353	61.8648																						1104.9	1128.96			626.501	626.501			14.089	14.089
2019-12-27_16:00:00	2019-12-28 02:00:03	0	38.62	33.55	1.6	0	0	297.89	-2.79	-4.2	24.74	5.04223	33.5956																						1125.6	1125.6			612.068	612.068			25.4241	25.4241
2019-12-27_17:00:00	2019-12-28 03:00:03	0	33.81	29.22	1.37	0	0	297.48	-1.45	-5.77	24.33	5.9494	14.1064																						853.808	1415.26			591.949	591.949			35.3954	35.3954
2019-12-27_18:00:00	2019-12-28 04:00:03	0	33.35	28.98	1.37	0	0	296.92	-0.74	-5.55	23.77	5.59912	7.59473																						839.84	1433.38			565.013	565.013			31.3501	31.3501
2019-12-27_19:00:00	2019-12-28 05:00:03	0	44.23	38.71	1.87	0	0	296.31	-1.31	-5.68	23.16	5.82911	12.9873																						1498.46	1498.46			536.386	536.386			33.9785	33.9785
2019-12-27_20:00:00	2019-12-28 06:00:03	0	45.42	39.36	1.88	0	0	297.11	-0.63	-6.35	23.96	6.38118	5.666																						1549.21	1549.21			574.082	574.082			40.7194	40.7194
2019-12-27_21:00:00	2019-12-28 07:00:03	0	41.09	35.23	1.65	0	0	299.05	0.04	-6.4	25.9	6.40012	359.642																						1241.15	1241.15			670.81	670.81			40.9616	40.9616
2019-12-27_22:00:00	2019-12-28 08:00:03	0	33.34	28.13	1.27	0	0	301.43	0.53	-5.59	28.28	5.61507	354.584																						791.297	1498.46			799.758	799.758			31.529	31.529
2019-12-27_23:00:00	2019-12-28 09:00:03	0	25.09	20.7	0.89	0	0	303.75	1.92	-4.35	30.6	4.75488	336.184																						428.49	2128.9			936.36	936.36			22.6089	22.6089
2019-12-28_00:00:00	2019-12-28 10:00:03	0	17.37	13.82	0.54	0	0	305.99	3.39	-4.37	32.84	5.53073	322.198																						190.992	2811.12			1078.47	1078.47			30.589	30.589
2019-12-28_01:00:00	2019-12-28 11:00:03	0	12.7	9.7	0.33	0	0	307.78	5	-3.39	34.63	6.04087	304.137																						94.09	3264.98			1199.24	1199.24			36.4921	36.4921
2019-12-28_02:00:00	2019-12-28 12:00:03	0	11.56	8.64	0.27	0	0	309.11	5.69	-1.67	35.96	5.93001	286.357																						74.6496	3387.24			1293.12	1293.12			35.165	35.165
2019-12-28_03:00:00	2019-12-28 13:00:03	0.01	11.27	8.32	0.27	0	0	310.08	5.39	-1.75	36.93	5.66697	287.987																						69.2224	3424.59			1363.82	1363.82			32.1146	32.1146
2019-12-28_04:00:00	2019-12-28 14:00:03	0.01	10.91	8.05	0.26	0	0	310.79	6.02	-0.48	37.64	6.03911	274.559																						64.8025	3456.26			1416.77	1416.77			36.4708	36.4708
2019-12-28_05:00:00	2019-12-28 15:00:03	0.04	10.75	7.56	0.23	0	0	310.81	6.36	1.93	37.66	6.64639	253.119																						57.1536	3514.12			1418.28	1418.28			44.1745	44.1745
2019-12-28_06:00:00	2019-12-28 16:00:03	0.22	11.88	7.68	0.22	0	0	310.95	5.96	2.54	37.8	6.47867	246.918																						58.9824	3499.91			1428.84	1428.84			41.9732	41.9732
2019-12-28_07:00:00	2019-12-28 17:00:03	0.19	11.17	7.26	0.21	0	0	311.14	4.88	0.54	37.99	4.90979	263.686																						52.7076	3549.78			1443.24	1443.24			24.106	24.106
2019-12-28_08:00:00	2019-12-28 18:00:03	0.4	12.63	7.59	0.21	0	0	310.66	6.08	-0.21	37.51	6.08363	271.978																						57.6081	3510.56			1407	1407			37.0105	37.0105
2019-12-28_09:00:00	2019-12-28 19:00:03	2.83	34.23	14.8	0.33	0	0	308.34	3.41	4.91	35.19	5.97798	214.78																						219.04	2708.16			1238.34	1238.34			35.7362	35.7362
2019-12-28_10:00:00	2019-12-28 20:00:03	3.75	40.73	16.18	0.33	0	0	305.06	2.05	-0.92	31.91	2.24698	294.17																						261.792	2566.44			1018.25	1018.25			5.0489	5.0489
2019-12-28_11:00:00	2019-12-28 21:00:03	3.87	36.9	13.16	0.23	0	0	303.62	2.51	1.28	30.47	2.81753	242.98																						173.186	2881.54			928.421	928.421			7.9385	7.9385
2019-12-28_12:00:00	2019-12-28 22:00:03	3.88	39.42	14.9	0.28	0	0	303.4	-0.22	3.81	30.25	3.81635	176.695																						222.01	2697.76			915.062	915.062			14.5645	14.5645
2019-12-28_13:00:00	2019-12-28 23:00:03	3.33	37.97	15.35	0.33	0	0	302.83	-1.86	3.15	29.68	3.65816	149.439																						235.623	2651.22			880.902	880.902			13.3821	13.3821
2019-12-28_14:00:00	2019-12-29 00:00:03	2.58	33.51	14.82	0.35	0	0	301	-3.76	1.3	27.85	3.97839	109.072																						219.632	2706.08			775.623	775.623			15.8276	15.8276
2019-12-28_15:00:00	2019-12-29 01:00:03	1.61	27.52	14.48	0.43	0	0	299.41	-3.11	0.35	26.26	3.12963	96.4209																						209.67	2741.57			689.588	689.588			9.7946	9.7946
2019-12-28_16:00:00	2019-12-29 02:00:03	0.73	29.78	21.14	0.87	0	0	298.71	-4.27	1.44	25.56	4.50627	108.636																						446.9	2088.49			653.314	653.314			20.3065	20.3065
2019-12-28_17:00:00	2019-12-29 03:00:03	0.64	30	21.68	0.9	0	0	298.95	-4.66	-0.16	25.8	4.66275	88.0337																						470.022	2039.43			665.64	665.64			21.7412	21.7412
2019-12-28_18:00:00	2019-12-29 04:00:03	0.59	21.71	14.05	0.5	0	0	297.23	-4.07	-1.57	24.08	4.36232	68.906																						197.403	2786.78			579.846	579.846			19.0298	19.0298
2019-12-28_19:00:00	2019-12-29 05:00:03	0.31	18.43	12.21	0.41	0	0	296.36	-3.13	-1.79	23.21	3.60569	60.2355																						149.084	2984.44			538.704	538.704			13.001	13.001
2019-12-28_20:00:00	2019-12-29 06:00:03	0.51	21.78	13.92	0.46	0	0	297.96	-3.44	-3.24	24.81	4.72559	46.715																						193.766	2800.53			615.536	615.536			22.3312	22.3312
2019-12-28_21:00:00	2019-12-29 07:00:03	0.86	24.6	14.35	0.44	0	0	300.3	-2.53	-3.28	27.15	4.14238	37.6446																						205.922	2755.2			737.123	737.123			17.1593	17.1593
2019-12-28_22:00:00	2019-12-29 08:00:03	1.45	26.75	13.43	0.36	0	0	303.66	-0.55	-2.25	30.51	2.31625	13.7364																						180.365	2852.63			930.86	930.86			5.365	5.365
2019-12-28_23:00:00	2019-12-29 09:00:03	1.98	28.86	13.09	0.32	0	0	306.38	0.73	-0.88	33.23	1.14337	320.323																						171.348	2889.06			1104.23	1104.23			1.3073	8.83652
2019-12-29_00:00:00	2019-12-29 10:00:03	2.42	30.41	12.83	0.29	0	0	308.18	1	-0.37	35.03	1.06626	290.304																						164.609	2917.08			1227.1	1227.1			1.1369	9.30094
2019-12-29_01:00:00	2019-12-29 11:00:03	3.17	32.51	12.59	0.24	0	0	309.17	1.41	1.67	36.02	2.18563	220.175																						158.508	2943.06			1297.44	1297.44			4.777	4.777
2019-12-29_02:00:00	2019-12-29 12:00:03	2.23	23.15	9.73	0.19	0	0	309.5	2.39	0.86	36.35	2.54002	250.21																						94.6729	3261.55			1321.32	1321.32			6.4517	6.4517
2019-12-29_03:00:00	2019-12-29 13:00:03	2.1	22.99	10.09	0.21	0	0	310.57	3.67	-0.81	37.42	3.75832	282.446																						101.808	3220.56			1400.26	1400.26			14.125	14.125
2019-12-29_04:00:00	2019-12-29 14:00:03	2.12	23.45	10.39	0.22	0	0	311.39	4.03	-0.53	38.24	4.0647	277.492																						107.952	3186.6			1462.3	1462.3			16.5218	16.5218
2019-12-29_05:00:00	2019-12-29 15:00:03	2.31	24.56	10.68	0.22	0	0	311.61	3.71	0.62	38.46	3.76145	260.513																						114.062	3153.95			1479.17	1479.17			14.1485	14.1485
2019-12-29_06:00:00	2019-12-29 16:00:03	2.33	24.85	10.77	0.23	0	0	311.52	3.4	-0.09	38.37	3.40119	271.516																						115.993	3143.84			1472.26	1472.26			11.5681	11.5681
2019-12-29_07:00:00	2019-12-29 17:00:03	2.65	26.03	10.81	0.21	0	0	311.58	3.85	0.68	38.43	3.90959	259.984																						116.856	3139.36			1476.86	1476.86			15.2849	15.2849
2019-12-29_08:00:00	2019-12-29 18:00:03	3.79	32.48	12.08	0.19	0	0	311.14	3.88	0.91	37.99	3.98529	256.801																						145.926	2998.66			1443.24	1443.24			15.8825	15.8825
2019-12-29_09:00:00	2019-12-29 19:00:03	4.42	36.47	12.88	0.19	0	0	310.23	1.81	1.3	37.08	2.22847	234.313																						165.894	2911.68			1374.93	1374.93			4.9661	4.9661
2019-12-29_10:00:00	2019-12-29 20:00:03	3.97	33.66	12.31	0.19	0	0	308.33	-0.5	-0.38	35.18	0.628013	52.7653																						151.536	2973.52			1237.63	1237.63			0.3944	12.1661
2019-12-29_11:00:00	2019-12-29 21:00:03	2.8	26.29	10.73	0.2	0	0	306.31	-0.83	-1.39	33.16	1.61895	30.8425																						115.133	3148.33			1099.59	1099.59			2.621	6.23526
2019-12-29_12:00:00	2019-12-29 22:00:03	2.14	22.46	9.92	0.2	0	0	304.39	-1.4	-1.7	31.24	2.20227	39.4726																						98.4064	3239.89			975.938	975.938			4.85	4.85
2019-12-29_13:00:00	2019-12-29 23:00:03	1.73	20.41	9.68	0.21	0	0	303.88	-1.68	-2.61	30.73	3.10395	32.7686																						93.7024	3267.27			944.333	944.333			9.6345	9.6345
2019-12-29_14:00:00	2019-12-30 00:00:03	1.47	27.58	17.11	0.62	0	0	302.52	-1.67	-3.63	29.37	3.99572	24.7051																						292.752	2473.07			862.597	862.597			15.9658	15.9658
2019-12-29_15:00:00	2019-12-30 01:00:03	0.67	27.98	20.44	0.82	0	0	301.14	-0.88	-3.92	27.99	4.01756	12.6526																						417.794	2152.96			783.44	783.44			16.1408	16.1408
2019-12-29_16:00:00	2019-12-30 02:00:03	0.36	21.25	15.47	0.55	0	0	300.83	-0.95	-5.41	27.68	5.49278	9.95972																						239.321	2638.88			766.182	766.182			30.1706	30.1706
2019-12-29_17:00:00	2019-12-30 03:00:03	0.3	18.05	12.74	0.4	0	0	300.54	0.04	-5.44	27.39	5.44015	359.579																						162.308	2926.81			750.212	750.212			29.5952	29.5952
2019-12-29_18:00:00	2019-12-30 04:00:03	0.19	17.16	12.33	0.38	0	0	299.6	-0.19	-4.78	26.45	4.78377	2.27633																						152.029	2971.34			699.603	699.603			22.8845	22.8845
2019-12-29_19:00:00	2019-12-30 05:00:03	0.13	16.88	12.3	0.38	0	0	298.24	-0.41	-3.81	25.09	3.832	6.14213																						151.29	2974.61			629.508	629.508			14.6842	14.6842
2019-12-29_20:00:00	2019-12-30 06:00:03	0.09	17.68	13.11	0.42	0	0	299.66	-0.43	-3.62	26.51	3.64545	6.77419																						171.872	2886.91			702.78	702.78			13.2893	13.2893
2019-12-29_21:00:00	2019-12-30 07:00:03	0.1	18.34	13.62	0.44	0	0	302.15	0.2	-4.49	29	4.49445	357.45																						185.504	2832.37			841	841			20.2001	20.2001
2019-12-29_22:00:00	2019-12-30 08:00:03	0.12	17.8	13.1	0.41	0	0	304.62	2	-2.7	31.47	3.36006	323.471																						171.61	2887.99			990.361	990.361			11.29	11.29
2019-12-29_23:00:00	2019-12-30 09:00:03	0.08	16.49	12.29	0.38	0	0	307.39	1.91	-2.06	34.24	2.80922	317.164																						151.044	2975.7			1172.38	1172.38			7.8917	7.8917
2019-12-30_00:00:00	2019-12-30 10:00:03	0.04	14.23	10.84	0.33	0	0	310	3.49	-1.63	36.85	3.85188	295.035																						117.506	3136			1357.92	1357.92			14.837	14.837
2019-12-30_01:00:00	2019-12-30 11:00:03	0.08	14.15	10.6	0.32	0	0	310.98	3.92	-1.72	37.83	4.28075	293.691																						112.36	3162.94			1431.11	1431.11			18.3248	18.3248
2019-12-30_02:00:00	2019-12-30 12:00:03	0.18	14.88	10.75	0.32	0	0	311.69	3.53	-2.41	38.54	4.27423	304.322																						115.562	3146.09			1485.33	1485.33			18.269	18.269
2019-12-30_03:00:00	2019-12-30 13:00:03	0.23	14.92	10.69	0.32	0	0	312.14	3.52	-3.19	38.99	4.75042	312.184																						114.276	3152.82			1520.22	1520.22			22.5665	22.5665
2019-12-30_04:00:00	2019-12-30 14:00:03	0.2	14.51	10.45	0.31	0	0	312.14	2.5	-3.98	38.99	4.70004	327.865																						109.202	3179.83			1520.22	1520.22			22.0904	22.0904
2019-12-30_05:00:00	2019-12-30 15:00:03	0.12	14.09	10.28	0.3	0	0	313.04	2.8	-5.81	39.89	6.4495	334.269																						105.678	3199.03			1591.21	1591.21			41.5961	41.5961
2019-12-30_06:00:00	2019-12-30 16:00:03	0.09	13.33	9.51	0.27	0	0	312.78	4.7	-5.39	39.63	7.15137	318.912																						90.4401	3286.73			1570.54	1570.54			51.1421	51.1421
2019-12-30_07:00:00	2019-12-30 17:00:03	0.09	12.75	9.09	0.25	0	0	312.92	4.91	-4.62	39.77	6.74185	313.257																						82.6281	3335.06			1581.65	1581.65			45.4525	45.4525
2019-12-30_08:00:00	2019-12-30 18:00:03	0.04	13.49	9.68	0.27	0	0	311.29	5.13	-6.84	38.14	8.55	323.13																						93.7024	3267.27			1454.66	1454.66			73.1025	73.1025
2019-12-30_09:00:00	2019-12-30 19:00:03	0.04	15.43	11.22	0.32	0	0	308.44	4.02	-7.59	35.29	8.58886	332.092																						125.888	3093.58			1245.38	1245.38			73.7685	73.7685
2019-12-30_10:00:00	2019-12-30 20:00:03	0.03	14.96	10.73	0.3	0	0	306.99	2.88	-7.11	33.84	7.67115	337.949						208																115.133	3148.33			1145.15	1145.15			58.8465	58.8465
2019-12-30_11:00:00	2019-12-30 21:00:03	0.04	14.1	9.99	0.27	0	0	306.27	1.33	-7.17	33.12	7.29231	349.491						192																99.8001	3231.92			1096.93	1096.93			53.1778	53.1778
2019-12-30_12:00:00	2019-12-30 22:00:03	0.05	13.69	9.6	0.25	0	0	305.53	-0.44	-7.1	32.38	7.11362	3.54627																						92.16	3276.42			1048.46	1048.46			50.6036	50.6036
2019-12-30_13:00:00	2019-12-30 23:00:03	0.06	13.94	9.77	0.26	0	0	304.42	-1.33	-5.9	31.27	6.04805	12.7036						145																95.4529	3256.98			977.813	977.813			36.5789	36.5789
2019-12-30_14:00:00	2019-12-31 00:00:03	0.08	15.1	10.56	0.28	0	0	303.21	-0.35	-6.67	30.06	6.67918	3.00385						165																111.514	3167.44			903.604	903.604			44.6114	44.6114
2019-12-30_15:00:00	2019-12-31 01:00:03	0.29	17.21	11.34	0.3	0	0	302.56	1.44	-6.97	29.41	7.1172	348.327						207																128.596	3080.25			864.948	864.948			50.6545	50.6545
2019-12-30_16:00:00	2019-12-31 02:00:03	0.39	17.06	10.56	0.26	0	0	301.53	1.02	-6.73	28.38	6.80686	351.382						247																111.514	3167.44			805.424	805.424			46.3333	46.3333
2019-12-30_17:00:00	2019-12-31 03:00:03	0.27	16.6	10.11	0.23	0	0	300.75	1.03	-7.02	27.6	7.09516	351.653						176																102.212	3218.29			761.76	761.76			50.3413	50.3413
2019-12-30_18:00:00	2019-12-31 04:00:03	0.12	15.4	9.34	0.2	0	0	299.99	0.95	-7.46	26.84	7.52025	352.743						175																87.2356	3306.25			720.386	720.386			56.5541	56.5541
2019-12-30_19:00:00	2019-12-31 05:00:03	0.03	11.58	7.09	0.14	0	0	299.54	1.17	-7.93	26.39	8.01585	351.607						147																50.2681	3570.06			696.432	696.432			64.2538	64.2538
2019-12-30_20:00:00	2019-12-31 06:00:03	0	7.84	4.66	0.08	0	0	300.89	2.58	-9.22	27.74	9.57417	344.367						170																21.7156	3866.35			769.508	769.508			91.6648	91.6648
2019-12-30_21:00:00	2019-12-31 07:00:03	0	6.42	3.56	0.05	0	0	302.58	2.99	-9.37	29.43	9.8355	342.302						138																12.6736	4004.36			866.125	866.125			96.737	96.737
2019-12-30_22:00:00	2019-12-31 08:00:03	0	6.34	3.06	0.02	0	0	304.94	4.05	-9.57	31.79	10.3917	337.062						139																9.3636	4067.89			1010.6	1010.6			107.987	107.987
2019-12-30_23:00:00	2019-12-31 09:00:03	0.01	7.55	3.47	0.01	0	0	306.93	6	-8.87	33.78	10.7087	325.924						192																12.0409	4015.76			1141.09	1141.09			114.677	114.677
2019-12-31_00:00:00	2019-12-31 10:00:03	0.05	8.18	3.78	0.02	0	0	308.49	8.19	-7.44	35.34	11.0648	312.253						388																14.2884	3976.56			1248.92	1248.92			122.43	122.43
2019-12-31_01:00:00	2019-12-31 11:00:03	0.03	8.31	4.15	0.04	0	0	309.51	8.82	-6.51	36.36	10.9623	306.431						466																17.2225	3930.04			1322.05	1322.05			120.172	120.172
2019-12-31_02:00:00	2019-12-31 12:00:03	0.12	9.35	4.24	0.04	0	0	310.41	8.98	-5.96	37.26	10.7778	303.572						428																17.9776	3918.76			1388.31	1388.31			116.162	116.162
2019-12-31_03:00:00	2019-12-31 13:00:03	0.58	13.59	4.6	0.03	0	0	310.45	9.2	-4.77	37.3	10.3631	297.406						381																21.16	3873.82			1391.29	1391.29			107.393	107.393
2019-12-31_04:00:00	2019-12-31 14:00:03	1.5	22.16	5.72	0.02	0	0	311.12	9.67	-3.73	37.97	10.3644	291.093						337																32.7184	3735.65			1441.72	1441.72			107.422	107.422
2019-12-31_05:00:00	2019-12-31 15:00:03	3.58	40.2	8.79	0.01	0	0	310.95	10.4	-2.11	37.8	10.6119	281.469						329																77.2641	3369.8			1428.84	1428.84			112.612	112.612
2019-12-31_06:00:00	2019-12-31 16:00:03	6.08	61.54	12.73	0.01	0	0	310.38	8.67	-2.46	37.23	9.01224	285.841						288																162.053	2927.89			1386.07	1386.07			81.2205	81.2205
2019-12-31_07:00:00	2019-12-31 17:00:03	5.54	58.73	12.54	0.01	0	0	309.68	8.46	-0.88	36.53	8.50565	275.938						272																157.252	2948.49			1334.44	1334.44			72.346	72.346
2019-12-31_08:00:00	2019-12-31 18:00:03	5.09	56.77	12.52	0.01	0	0	308.81	7.07	0.55	35.66	7.09136	265.552						302																156.75	2950.66			1271.64	1271.64			50.2874	50.2874
2019-12-31_09:00:00	2019-12-31 19:00:03	5.22	59.5	13.65	0.02	0	0	306.58	5.47	3.17	33.43	6.32217	239.907						365																186.323	2829.18			1117.56	1117.56			39.9698	39.9698
2019-12-31_10:00:00	2019-12-31 20:00:03	5.64	65.53	15.16	0.02	0	0	304.55	3.63	2.85	31.4	4.61513	231.864						771																229.826	2670.82			985.96	985.96			21.2994	21.2994
2019-12-31_11:00:00	2019-12-31 21:00:03	5.72	74.4	16.27	0.03	0	0	303.73	2.69	4.6	30.58	5.3288	210.318						723																264.713	2557.32			935.136	935.136			28.3961	28.3961
2019-12-31_12:00:00	2019-12-31 22:00:03	3.61	63.42	13.5	0.04	0	0	301.36	1.31	3.58	28.21	3.81215	200.099						827																182.25	2845.16			795.804	795.804			14.5325	14.5325
2019-12-31_13:00:00	2019-12-31 23:00:03	2.92	57.74	12.56	0.06	0	0	301.8	0.28	2.5	28.65	2.51563	186.39						1069																157.754	2946.32			820.823	820.823			6.3284	6.3284
2019-12-31_14:00:00	2020-01-01 00:00:03	3.19	69.41	22.73	0.65	0	0	300.54	-1.23	2.02	27.39	2.36502	148.662						936																516.653	1945.69			750.212	750.212			5.5933	5.5933
2019-12-31_15:00:00	2020-01-01 01:00:03	3.6	150.7	97.69	4.76	0.01	0.01	299.44	-1.7	0.61	26.29	1.80613	109.739						534																9543.34	9543.34			691.164	691.164			3.2621	5.33551
2019-12-31_16:00:00	2020-01-01 02:00:03	1.5	227.7	185.2	9.49	0.02	0.01	297.98	-4.32	-3.45	24.83	5.52855	51.3889						479																34299	34299			616.529	616.529			30.5649	30.5649
2019-12-31_17:00:00	2020-01-01 03:00:03	0.83	181.62	146.58	7.3	0.02	0.01	295.7	-4.02	-1.69	22.55	4.36079	67.1983						361																21485.7	21485.7			508.503	508.503			19.0165	19.0165
2019-12-31_18:00:00	2020-01-01 04:00:03	0.87	123.45	93.08	4.36	0.01	0.01	295.39	-3.56	-1.06	22.24	3.71446	73.4191						236																8663.89	8663.89			494.618	499.522			13.7972	13.7972
2019-12-31_19:00:00	2020-01-01 05:00:03	0.9	110.06	81.05	3.69	0.01	0	295.53	-2.06	0.44	22.38	2.10647	102.057						173																6569.1	6569.1			500.864	500.864			4.4372	4.4372
2019-12-31_20:00:00	2020-01-01 06:00:03	0.89	105.83	77.47	3.47	0.01	0	295.82	-0.94	1.43	22.67	1.71129	146.681						131																6001.6	6001.6			513.929	513.929			2.9285	5.78265
2019-12-31_21:00:00	2020-01-01 07:00:03	1.07	108.57	78.52	3.49	0.01	0	297.25	0.25	1.61	24.1	1.62929	188.826						157																6165.39	6165.39			580.81	580.81			2.6546	6.18371
2019-12-31_22:00:00	2020-01-01 08:00:03	1.43	121.05	86.97	3.89	0.01	0.01	299.38	1.07	2.16	26.23	2.4105	206.352						152																7563.78	7563.78			688.013	688.013			5.8105	5.8105
2019-12-31_23:00:00	2020-01-01 09:00:03	1.7	133.18	96.2	4.34	0.01	0.01	301.3	1.44	2.47	28.15	2.85911	210.242						160																9254.44	9254.44			792.423	792.423			8.1745	8.1745
2020-01-01_00:00:00	2020-01-01 10:00:03	2.23	131.14	89.99	3.99	0.01	0.01	303.11	2.32	2.22	29.96	3.21104	226.262																						8098.2	8098.2			897.602	897.602			10.3108	10.3108
																																			552293	2.74749e+06			543071	667757			24829.3	25017.1
