# Supplementary material for: Black Carbon Emission, Transport and Effect on Radiation Forcing Modelling During the Summer 2019–2020 Wildfires in Southeast Australia
Source: Preprints.org preprint supplement (doi:10.20944/preprints202302.0293.v1), 2023-02-17
Supplement: Supplementary file 9 [file merra_bc_201912_107.xlsx]

## Sheet: merra_bc_201912_107
lat	lon	date	time	date_time	bc	bccmass	totexttau	bcexttau	bcangstr			Date	MERRA-2 Predicted BC	Observed PM₂ι₅						Observed BC	WRF-Chem predicted BC
-34	150.625	20191201	0	2019-12-01 10:00:00	2.89	6846.2	0.62	0.06	1.4			2019-12-01	8.38143	0						0.671208	0.575851
-34	150.625	20191201	1	2019-12-01 11:00:00	8.48	21837.3	1.83	0.2	1.4			2019-12-02	2.58417	4.0875				LIVERPOOL 2 BC7 1h average [ng/m³]	BC(ng/m3)	2.68171	0.586623
-34	150.625	20191201	2	2019-12-01 12:00:00	14.99	40673.3	3.3	0.38	1.4			2019-12-03	4.12333	4.06667				671.208	575.851	5.28688	1.46317
-34	150.625	20191201	3	2019-12-01 13:00:00	6.35	17522.3	1.46	0.16	1.4			2019-12-04	9.78833	9.04583				2681.71	586.623	4.17583	2.0585
-34	150.625	20191201	4	2019-12-01 14:00:00	13.41	37266.3	3.1	0.35	1.4			2019-12-05	16.0471	30.7625				5286.88	1463.17	4.31667	2.69801
-34	150.625	20191201	5	2019-12-01 15:00:00	16.74	46147.9	3.92	0.43	1.4			2019-12-06	22.9375	19.3208				4175.83	2058.5	2.44554	0.650477
-34	150.625	20191201	6	2019-12-01 16:00:00	15.63	40395.7	3.54	0.38	1.4			2019-12-07	9.78583	86.3708				4316.67	2698.01	1.5145	0.804631
-34	150.625	20191201	7	2019-12-01 17:00:00	12.43	27374.5	2.46	0.26	1.41			2019-12-08	1.37208	24.8167				2445.54	650.477	0.393667	1.6715
-34	150.625	20191201	8	2019-12-01 18:00:00	8.16	14311.3	1.33	0.13	1.41			2019-12-09	8.88333	64.8				1514.5	804.631	0.948783	1.68892
-34	150.625	20191201	9	2019-12-01 19:00:00	5.03	6372.8	0.6	0.06	1.41			2019-12-10	8.86708	98.9625				393.667	1671.5	4.67496	0.551793
-34	150.625	20191201	10	2019-12-01 20:00:00	3.41	3534.84	0.34	0.03	1.41			2019-12-11	1.50583	24.5458				948.783	1688.92	0.453625	0.0944917
-34	150.625	20191201	11	2019-12-01 21:00:00	3.15	2752.63	0.28	0.03	1.41			2019-12-12	1.09333	18.0375				4674.96	551.793	0.507792	0.0251548
-34	150.625	20191201	12	2019-12-01 22:00:00	3.3	2545.98	0.28	0.02	1.42			2019-12-13	0.798333	9.0375				453.625	94.4917	0.59575	0.00677245
-34	150.625	20191201	13	2019-12-01 23:00:00	3.37	2543.84	0.3	0.02	1.42			2019-12-14	2.25458	39.3667				507.792	25.1548	1.32622	0.139641
-34	150.625	20191201	14	2019-12-02 00:00:00	3.08	2322.04	0.26	0.02	1.41			2019-12-15	6.11875	30.5083				595.75	6.77245	#DIV/0!	0.470524
-34	150.625	20191201	15	2019-12-02 01:00:00	2.61	1920.48	0.21	0.02	1.41			2019-12-16	2.13	23.0625				1326.22	139.641	0.305818	0.131579
-34	150.625	20191201	16	2019-12-02 02:00:00	2.08	1459.34	0.18	0.01	1.43			2019-12-17	2.06083	8.05417				#DIV/0!	470.524	0.980458	0.0925568
-34	150.625	20191201	17	2019-12-02 03:00:00	1.61	1161.83	0.15	0.01	1.43			2019-12-18	11.4446	30.8375				305.818	131.579	1.72904	0.156734
-34	150.625	20191201	18	2019-12-02 04:00:00	1.29	1124.12	0.15	0.01	1.43			2019-12-19	22.1404	46.8458				980.458	92.5568	3.16962	1.45898
-34	150.625	20191201	19	2019-12-02 05:00:00	1.1	1120.54	0.14	0.01	1.41			2019-12-20	4.75625	7.46667				1729.04	156.734	1.00533	0.593718
-34	150.625	20191201	20	2019-12-02 06:00:00	0.72	947.66	0.11	0.01	1.41			2019-12-21	12.0325	49.6542				3169.62	1458.98	1.513	0.795279
-34	150.625	20191201	21	2019-12-02 07:00:00	0.42	773.68	0.09	0.01	1.41			2019-12-22	3.86	15.3625				1005.33	593.718	0.287708	0.332495
-34	150.625	20191201	22	2019-12-02 08:00:00	0.58	1089.42	0.13	0.01	1.41			2019-12-23	2.4175	14.0708				1513	795.279	0.611826	0.0644995
-34	150.625	20191201	23	2019-12-02 09:00:00	1.76	3025.46	0.34	0.03	1.41			2019-12-24	1.18667	10.1667				287.708	332.495	0.97975	0.0174149
-34	150.625	20191202	0	2019-12-02 10:00:00	2.73	5060.19	0.61	0.05	1.41			2019-12-25	0.720833	13.1083				611.826	64.4995	0.644	0
-34	150.625	20191202	1	2019-12-02 11:00:00	5.94	11701.2	1.5	0.11	1.42			2019-12-26	1.45667	10.7125				979.75	17.4149	0.533792	0.00709494
-34	150.625	20191202	2	2019-12-02 12:00:00	8.24	16344.4	2	0.16	1.42			2019-12-27	1.97833	8.79583				644	0	0.630083	0.0309598
-34	150.625	20191202	3	2019-12-02 13:00:00	8.45	16091.8	1.66	0.15	1.41			2019-12-28	4.12708	16.65				533.792	7.09494	0.765375	0.301535
-34	150.625	20191202	4	2019-12-02 14:00:00	8.12	15809.5	1.56	0.15	1.4			2019-12-29	14.34	44.2708				630.083	30.9598	0.968	1.11842
-34	150.625	20191202	5	2019-12-02 15:00:00	5.5	11075.9	1.06	0.1	1.4			2019-12-30	6.46	61.2667				765.375	301.535	1.01052	0.780444
-34	150.625	20191202	6	2019-12-02 16:00:00	2.55	5164.75	0.49	0.05	1.4			2019-12-31	5.81	52.4375				968	1118.42	2.9678	0.491809
-34	150.625	20191202	7	2019-12-02 17:00:00	1.28	2629.76	0.25	0.02	1.4			2020-01-01	1.346	17.1545				1010.52	780.444
-34	150.625	20191202	8	2019-12-02 18:00:00	0.88	1742.51	0.17	0.02	1.4									2967.8	491.809
-34	150.625	20191202	9	2019-12-02 19:00:00	0.67	1272.15	0.12	0.01	1.4
-34	150.625	20191202	10	2019-12-02 20:00:00	0.61	1062.13	0.1	0.01	1.4
-34	150.625	20191202	11	2019-12-02 21:00:00	0.56	890.97	0.09	0.01	1.41
-34	150.625	20191202	12	2019-12-02 22:00:00	0.58	828.5	0.09	0.01	1.41
-34	150.625	20191202	13	2019-12-02 23:00:00	0.66	827.67	0.09	0.01	1.4
-34	150.625	20191202	14	2019-12-03 00:00:00	0.66	764.8	0.08	0.01	1.4
-34	150.625	20191202	15	2019-12-03 01:00:00	0.6	683.44	0.07	0.01	1.4
-34	150.625	20191202	16	2019-12-03 02:00:00	0.52	629.93	0.06	0.01	1.4
-34	150.625	20191202	17	2019-12-03 03:00:00	0.49	627.07	0.06	0.01	1.4
-34	150.625	20191202	18	2019-12-03 04:00:00	0.49	654.7	0.06	0.01	1.4
-34	150.625	20191202	19	2019-12-03 05:00:00	0.49	675.45	0.06	0.01	1.4
-34	150.625	20191202	20	2019-12-03 06:00:00	0.41	668.18	0.05	0.01	1.4
-34	150.625	20191202	21	2019-12-03 07:00:00	0.31	678.5	0.05	0.01	1.4
-34	150.625	20191202	22	2019-12-03 08:00:00	0.39	845.47	0.06	0.01	1.4
-34	150.625	20191202	23	2019-12-03 09:00:00	0.97	1632.87	0.13	0.02	1.4
-34	150.625	20191203	0	2019-12-03 10:00:00	2.91	4518.86	0.39	0.04	1.4
-34	150.625	20191203	1	2019-12-03 11:00:00	9.54	15468	1.3	0.14	1.4
-34	150.625	20191203	2	2019-12-03 12:00:00	16.46	27992.7	2.32	0.26	1.4
-34	150.625	20191203	3	2019-12-03 13:00:00	5.41	9925.7	0.85	0.09	1.4
-34	150.625	20191203	4	2019-12-03 14:00:00	12.57	24089.9	1.99	0.22	1.4
-34	150.625	20191203	5	2019-12-03 15:00:00	14.82	28634.2	2.33	0.27	1.4
-34	150.625	20191203	6	2019-12-03 16:00:00	12.33	22776.7	1.86	0.21	1.4
-34	150.625	20191203	7	2019-12-03 17:00:00	8.04	13131.4	1.09	0.12	1.4
-34	150.625	20191203	8	2019-12-03 18:00:00	3.93	5390.74	0.48	0.05	1.4
-34	150.625	20191203	9	2019-12-03 19:00:00	2.03	2801.82	0.27	0.03	1.4
-34	150.625	20191203	10	2019-12-03 20:00:00	1.67	2355.57	0.23	0.02	1.4
-34	150.625	20191203	11	2019-12-03 21:00:00	1.43	1935.45	0.18	0.02	1.4
-34	150.625	20191203	12	2019-12-03 22:00:00	1.28	1629.93	0.15	0.02	1.4
-34	150.625	20191203	13	2019-12-03 23:00:00	1.21	1452.45	0.13	0.01	1.4
-34	150.625	20191203	14	2019-12-04 00:00:00	1.06	1220.6	0.11	0.01	1.4
-34	150.625	20191203	15	2019-12-04 01:00:00	0.9	1013.77	0.09	0.01	1.4
-34	150.625	20191203	16	2019-12-04 02:00:00	0.82	924.17	0.08	0.01	1.4
-34	150.625	20191203	17	2019-12-04 03:00:00	0.81	930.4	0.08	0.01	1.4
-34	150.625	20191203	18	2019-12-04 04:00:00	0.84	953.87	0.09	0.01	1.4
-34	150.625	20191203	19	2019-12-04 05:00:00	0.93	964.2	0.09	0.01	1.4
-34	150.625	20191203	20	2019-12-04 06:00:00	0.86	959.36	0.08	0.01	1.4
-34	150.625	20191203	21	2019-12-04 07:00:00	0.57	965.82	0.08	0.01	1.4
-34	150.625	20191203	22	2019-12-04 08:00:00	0.58	1154.47	0.1	0.01	1.4
-34	150.625	20191203	23	2019-12-04 09:00:00	1.21	2326.32	0.19	0.02	1.4
-34	150.625	20191204	0	2019-12-04 10:00:00	3.77	7387.29	0.63	0.07	1.4
-34	150.625	20191204	1	2019-12-04 11:00:00	14.49	29651.4	2.47	0.28	1.4
-34	150.625	20191204	2	2019-12-04 12:00:00	26.56	56390.7	4.65	0.52	1.4
-34	150.625	20191204	3	2019-12-04 13:00:00	7.96	17595.4	1.47	0.16	1.4
-34	150.625	20191204	4	2019-12-04 14:00:00	20.19	46600.1	3.82	0.43	1.4
-34	150.625	20191204	5	2019-12-04 15:00:00	25.85	61278.3	4.99	0.57	1.4
-34	150.625	20191204	6	2019-12-04 16:00:00	21.01	47522	3.86	0.44	1.4
-34	150.625	20191204	7	2019-12-04 17:00:00	18.98	39681.3	3.23	0.37	1.4
-34	150.625	20191204	8	2019-12-04 18:00:00	16.69	26672.3	2.18	0.25	1.4
-34	150.625	20191204	9	2019-12-04 19:00:00	14.76	16406.5	1.35	0.15	1.4
-34	150.625	20191204	10	2019-12-04 20:00:00	13.09	10906	0.9	0.1	1.4
-34	150.625	20191204	11	2019-12-04 21:00:00	12.14	7601.89	0.62	0.07	1.4
-34	150.625	20191204	12	2019-12-04 22:00:00	13.54	5770.42	0.47	0.05	1.4
-34	150.625	20191204	13	2019-12-04 23:00:00	17.31	4898.91	0.4	0.05	1.4
-34	150.625	20191204	14	2019-12-05 00:00:00	20.63	4499.36	0.37	0.04	1.4
-34	150.625	20191204	15	2019-12-05 01:00:00	21.92	4137.44	0.35	0.04	1.4
-34	150.625	20191204	16	2019-12-05 02:00:00	21.65	3803.86	0.33	0.04	1.4
-34	150.625	20191204	17	2019-12-05 03:00:00	20.44	3515.26	0.31	0.03	1.4
-34	150.625	20191204	18	2019-12-05 04:00:00	18.73	3278.19	0.29	0.03	1.4
-34	150.625	20191204	19	2019-12-05 05:00:00	16.8	3054.16	0.27	0.03	1.4
-34	150.625	20191204	20	2019-12-05 06:00:00	13.76	2750.48	0.24	0.03	1.4
-34	150.625	20191204	21	2019-12-05 07:00:00	5.8	2357.53	0.21	0.02	1.4
-34	150.625	20191204	22	2019-12-05 08:00:00	2.39	2259.67	0.2	0.02	1.4
-34	150.625	20191204	23	2019-12-05 09:00:00	2.98	4340.2	0.38	0.04	1.4
-34	150.625	20191205	0	2019-12-05 10:00:00	9.13	17850.5	1.51	0.17	1.4
-34	150.625	20191205	1	2019-12-05 11:00:00	26.88	57226.3	4.74	0.53	1.4
-34	150.625	20191205	2	2019-12-05 12:00:00	40.49	92095.2	7.45	0.86	1.4
-34	150.625	20191205	3	2019-12-05 13:00:00	20.24	50638.1	4.05	0.47	1.4
-34	150.625	20191205	4	2019-12-05 14:00:00	33.25	82432.9	6.49	0.77	1.4
-34	150.625	20191205	5	2019-12-05 15:00:00	34.6	75521.5	5.9	0.7	1.4
-34	150.625	20191205	6	2019-12-05 16:00:00	27.83	45033.8	3.49	0.42	1.4
-34	150.625	20191205	7	2019-12-05 17:00:00	15.94	20229.3	1.58	0.19	1.4
-34	150.625	20191205	8	2019-12-05 18:00:00	6.46	9824.79	0.78	0.09	1.41
-34	150.625	20191205	9	2019-12-05 19:00:00	3.85	6949.52	0.56	0.07	1.41
-34	150.625	20191205	10	2019-12-05 20:00:00	3.89	5648.36	0.47	0.05	1.41
-34	150.625	20191205	11	2019-12-05 21:00:00	4.04	4515.33	0.37	0.04	1.41
-34	150.625	20191205	12	2019-12-05 22:00:00	4.75	4192.16	0.35	0.04	1.41
-34	150.625	20191205	13	2019-12-05 23:00:00	8.68	4105.17	0.35	0.04	1.41
-34	150.625	20191205	14	2019-12-06 00:00:00	9.48	3568.34	0.32	0.03	1.42
-34	150.625	20191205	15	2019-12-06 01:00:00	8.87	2907.31	0.27	0.03	1.42
-34	150.625	20191205	16	2019-12-06 02:00:00	9.1	2627.4	0.25	0.03	1.43
-34	150.625	20191205	17	2019-12-06 03:00:00	11.48	2789.29	0.25	0.03	1.42
-34	150.625	20191205	18	2019-12-06 04:00:00	14.62	3016.54	0.27	0.03	1.41
-34	150.625	20191205	19	2019-12-06 05:00:00	17.11	3207.62	0.29	0.03	1.41
-34	150.625	20191205	20	2019-12-06 06:00:00	15.47	3277.72	0.31	0.03	1.42
-34	150.625	20191205	21	2019-12-06 07:00:00	7.08	3552.12	0.34	0.03	1.42
-34	150.625	20191205	22	2019-12-06 08:00:00	4.37	4652.23	0.44	0.04	1.42
-34	150.625	20191205	23	2019-12-06 09:00:00	6.01	9124.3	0.84	0.09	1.42
-34	150.625	20191206	0	2019-12-06 10:00:00	8.12	14112.9	1.23	0.13	1.41
-34	150.625	20191206	1	2019-12-06 11:00:00	21.38	37111.2	3.02	0.35	1.41
-34	150.625	20191206	2	2019-12-06 12:00:00	38.58	62010.7	4.88	0.58	1.4
-34	150.625	20191206	3	2019-12-06 13:00:00	76.34	76076.5	5.89	0.71	1.4
-34	150.625	20191206	4	2019-12-06 14:00:00	132.94	91755.4	7	0.85	1.4
-34	150.625	20191206	5	2019-12-06 15:00:00	108.88	90300.9	6.84	0.84	1.4
-34	150.625	20191206	6	2019-12-06 16:00:00	4.87	8598.87	0.68	0.08	1.4
-34	150.625	20191206	7	2019-12-06 17:00:00	5.02	10556.2	0.83	0.1	1.4
-34	150.625	20191206	8	2019-12-06 18:00:00	5	10196.1	0.8	0.09	1.4
-34	150.625	20191206	9	2019-12-06 19:00:00	5.54	8218.8	0.66	0.08	1.4
-34	150.625	20191206	10	2019-12-06 20:00:00	8.06	6237.32	0.51	0.06	1.4
-34	150.625	20191206	11	2019-12-06 21:00:00	9.66	4929.44	0.43	0.05	1.4
-34	150.625	20191206	12	2019-12-06 22:00:00	10.74	4411.03	0.41	0.04	1.4
-34	150.625	20191206	13	2019-12-06 23:00:00	11.78	4264.13	0.42	0.04	1.4
-34	150.625	20191206	14	2019-12-07 00:00:00	12.74	4139.87	0.43	0.04	1.4
-34	150.625	20191206	15	2019-12-07 01:00:00	14.61	4126.04	0.43	0.04	1.41
-34	150.625	20191206	16	2019-12-07 02:00:00	16.84	4230.62	0.43	0.04	1.41
-34	150.625	20191206	17	2019-12-07 03:00:00	19.34	4437.24	0.45	0.04	1.41
-34	150.625	20191206	18	2019-12-07 04:00:00	21.65	4673.7	0.46	0.04	1.41
-34	150.625	20191206	19	2019-12-07 05:00:00	23.42	4891.64	0.47	0.05	1.41
-34	150.625	20191206	20	2019-12-07 06:00:00	22.9	4869.59	0.46	0.05	1.4
-34	150.625	20191206	21	2019-12-07 07:00:00	14.91	4903.79	0.45	0.05	1.4
-34	150.625	20191206	22	2019-12-07 08:00:00	5.18	5456.64	0.48	0.05	1.4
-34	150.625	20191206	23	2019-12-07 09:00:00	4.42	7485.48	0.64	0.07	1.4
-34	150.625	20191207	0	2019-12-07 10:00:00	4.42	9290.4	0.78	0.09	1.41
-34	150.625	20191207	1	2019-12-07 11:00:00	6.98	16922.3	1.4	0.16	1.4
-34	150.625	20191207	2	2019-12-07 12:00:00	10.21	27629.2	2.27	0.26	1.4
-34	150.625	20191207	3	2019-12-07 13:00:00	8.18	25583.1	2.12	0.24	1.4
-34	150.625	20191207	4	2019-12-07 14:00:00	10.53	35221.8	2.91	0.33	1.4
-34	150.625	20191207	5	2019-12-07 15:00:00	9.84	37113.6	3.1	0.34	1.4
-34	150.625	20191207	6	2019-12-07 16:00:00	7.48	31944.6	2.73	0.3	1.4
-34	150.625	20191207	7	2019-12-07 17:00:00	5.5	23510.1	2.05	0.22	1.4
-34	150.625	20191207	8	2019-12-07 18:00:00	3.99	15176.1	1.35	0.14	1.4
-34	150.625	20191207	9	2019-12-07 19:00:00	3.11	9459.58	0.89	0.09	1.4
-34	150.625	20191207	10	2019-12-07 20:00:00	2.69	6142.07	0.63	0.06	1.41
-34	150.625	20191207	11	2019-12-07 21:00:00	2.25	4300.47	0.5	0.04	1.41
-34	150.625	20191207	12	2019-12-07 22:00:00	1.78	3241.41	0.45	0.03	1.42
-34	150.625	20191207	13	2019-12-07 23:00:00	1.89	2594.69	0.41	0.03	1.43
-34	150.625	20191207	14	2019-12-08 00:00:00	1.88	2144.12	0.36	0.02	1.44
-34	150.625	20191207	15	2019-12-08 01:00:00	1.77	1838.95	0.39	0.02	1.45
-34	150.625	20191207	16	2019-12-08 02:00:00	1.59	1629.46	0.4	0.02	1.45
-34	150.625	20191207	17	2019-12-08 03:00:00	1.51	1485.35	0.36	0.02	1.45
-34	150.625	20191207	18	2019-12-08 04:00:00	1.59	1387.58	0.34	0.01	1.45
-34	150.625	20191207	19	2019-12-08 05:00:00	1.56	1317.42	0.31	0.01	1.45
-34	150.625	20191207	20	2019-12-08 06:00:00	0.91	1233.93	0.26	0.01	1.44
-34	150.625	20191207	21	2019-12-08 07:00:00	0.65	1198.59	0.23	0.01	1.44
-34	150.625	20191207	22	2019-12-08 08:00:00	0.69	1347.34	0.23	0.01	1.43
-34	150.625	20191207	23	2019-12-08 09:00:00	1.01	2013.48	0.29	0.02	1.42
-34	150.625	20191208	0	2019-12-08 10:00:00	1.34	17844.7	1.69	0.17	1.41
-34	150.625	20191208	1	2019-12-08 11:00:00	1.84	19790.5	1.92	0.19	1.41
-34	150.625	20191208	2	2019-12-08 12:00:00	2.42	19069	1.93	0.18	1.41
-34	150.625	20191208	3	2019-12-08 13:00:00	1.53	8905.03	0.93	0.08	1.41
-34	150.625	20191208	4	2019-12-08 14:00:00	1.89	10607.8	1.07	0.1	1.41
-34	150.625	20191208	5	2019-12-08 15:00:00	1.82	10969.5	1.08	0.1	1.41
-34	150.625	20191208	6	2019-12-08 16:00:00	1.56	11037.4	1.07	0.1	1.4
-34	150.625	20191208	7	2019-12-08 17:00:00	1.34	10915.5	1.07	0.1	1.41
-34	150.625	20191208	8	2019-12-08 18:00:00	1.16	10390.5	1.05	0.1	1.41
-34	150.625	20191208	9	2019-12-08 19:00:00	1.04	9579.86	1.03	0.09	1.41
-34	150.625	20191208	10	2019-12-08 20:00:00	0.99	8665.39	0.99	0.08	1.41
-34	150.625	20191208	11	2019-12-08 21:00:00	0.94	7727.96	0.89	0.07	1.42
-34	150.625	20191208	12	2019-12-08 22:00:00	0.92	6940.37	0.81	0.07	1.41
-34	150.625	20191208	13	2019-12-08 23:00:00	0.98	6458.07	0.76	0.06	1.41
-34	150.625	20191208	14	2019-12-09 00:00:00	1.07	6211.13	0.72	0.06	1.41
-34	150.625	20191208	15	2019-12-09 01:00:00	1.16	6195.97	0.72	0.06	1.41
-34	150.625	20191208	16	2019-12-09 02:00:00	1.23	6384.9	0.75	0.06	1.42
-34	150.625	20191208	17	2019-12-09 03:00:00	1.27	6611.35	0.76	0.06	1.41
-34	150.625	20191208	18	2019-12-09 04:00:00	1.29	6770.66	0.78	0.06	1.41
-34	150.625	20191208	19	2019-12-09 05:00:00	1.3	6792.91	0.77	0.06	1.41
-34	150.625	20191208	20	2019-12-09 06:00:00	0.85	6671.28	0.74	0.06	1.41
-34	150.625	20191208	21	2019-12-09 07:00:00	0.74	6406.36	0.7	0.06	1.41
-34	150.625	20191208	22	2019-12-09 08:00:00	1.03	6002.22	0.64	0.06	1.41
-34	150.625	20191208	23	2019-12-09 09:00:00	1.5	5543.32	0.55	0.05	1.41
-34	150.625	20191209	0	2019-12-09 10:00:00	4.73	12326.6	1.1	0.12	1.4
-34	150.625	20191209	1	2019-12-09 11:00:00	11.41	23458.9	2.13	0.22	1.4
-34	150.625	20191209	2	2019-12-09 12:00:00	18.62	41506.3	3.71	0.39	1.4
-34	150.625	20191209	3	2019-12-09 13:00:00	8.08	24257.5	2.09	0.23	1.4
-34	150.625	20191209	4	2019-12-09 14:00:00	14.52	44898.8	3.9	0.42	1.4
-34	150.625	20191209	5	2019-12-09 15:00:00	18.1	59426.5	5.18	0.55	1.4
-34	150.625	20191209	6	2019-12-09 16:00:00	19.53	63356.5	5.56	0.59	1.4
-34	150.625	20191209	7	2019-12-09 17:00:00	18.71	59889	5.28	0.56	1.4
-34	150.625	20191209	8	2019-12-09 18:00:00	17.12	52260.5	4.61	0.49	1.4
-34	150.625	20191209	9	2019-12-09 19:00:01	15.97	42946.7	3.8	0.4	1.4
-34	150.625	20191209	10	2019-12-09 20:00:01	15.03	35287.5	3.15	0.33	1.4
-34	150.625	20191209	11	2019-12-09 21:00:01	13.66	29992.3	2.73	0.28	1.4
-34	150.625	20191209	12	2019-12-09 22:00:01	13.13	26035.3	2.42	0.24	1.4
-34	150.625	20191209	13	2019-12-09 23:00:01	13.15	22734.7	2.14	0.21	1.41
-34	150.625	20191209	14	2019-12-10 00:00:01	14.89	20223.4	1.93	0.19	1.41
-34	150.625	20191209	15	2019-12-10 01:00:01	18.46	18308.7	1.73	0.17	1.41
-34	150.625	20191209	16	2019-12-10 02:00:01	22.46	16518.8	1.49	0.16	1.41
-34	150.625	20191209	17	2019-12-10 03:00:01	25.14	14467.5	1.23	0.13	1.4
-34	150.625	20191209	18	2019-12-10 04:00:01	25.55	12366.5	1.02	0.12	1.4
-34	150.625	20191209	19	2019-12-10 05:00:01	23.08	10334.2	0.83	0.1	1.4
-34	150.625	20191209	20	2019-12-10 06:00:01	18.46	8286.76	0.65	0.08	1.4
-34	150.625	20191209	21	2019-12-10 07:00:01	13.98	6560.61	0.51	0.06	1.41
-34	150.625	20191209	22	2019-12-10 08:00:01	9.33	5672.13	0.44	0.05	1.41
-34	150.625	20191209	23	2019-12-10 09:00:01	3.92	6507.04	0.51	0.06	1.41
-34	150.625	20191210	0	2019-12-10 10:00:01	2.82	12000.4	0.97	0.11	1.41
-34	150.625	20191210	1	2019-12-10 11:00:01	4.56	15290.7	1.22	0.14	1.4
-34	150.625	20191210	2	2019-12-10 12:00:01	5.1	19038.4	1.55	0.18	1.4
-34	150.625	20191210	3	2019-12-10 13:00:01	4.54	19808.6	1.87	0.19	1.41
-34	150.625	20191210	4	2019-12-10 14:00:01	4.37	20428.6	2.34	0.2	1.42
-34	150.625	20191210	5	2019-12-10 15:00:01	3.39	17460	2.17	0.17	1.42
-34	150.625	20191210	6	2019-12-10 16:00:01	2.9	12930.5	1.62	0.13	1.42
-34	150.625	20191210	7	2019-12-10 17:00:01	2.65	9028.89	1.11	0.09	1.42
-34	150.625	20191210	8	2019-12-10 18:00:01	2.17	6319.05	0.86	0.06	1.43
-34	150.625	20191210	9	2019-12-10 19:00:01	1.68	4440.26	0.7	0.04	1.44
-34	150.625	20191210	10	2019-12-10 20:00:01	1.26	3076.08	0.55	0.03	1.45
-34	150.625	20191210	11	2019-12-10 21:00:01	0.89	2106.57	0.45	0.02	1.46
-34	150.625	20191210	12	2019-12-10 22:00:01	0.64	1702.92	0.4	0.02	1.45
-34	150.625	20191210	13	2019-12-10 23:00:01	0.57	1612.79	0.38	0.02	1.45
-34	150.625	20191210	14	2019-12-11 00:00:01	0.53	1510.17	0.32	0.02	1.44
-34	150.625	20191210	15	2019-12-11 01:00:01	0.53	1373.96	0.31	0.01	1.43
-34	150.625	20191210	16	2019-12-11 02:00:01	0.55	1284.97	0.3	0.01	1.43
-34	150.625	20191210	17	2019-12-11 03:00:01	0.58	1266.23	0.3	0.01	1.43
-34	150.625	20191210	18	2019-12-11 04:00:01	0.63	1261.9	0.28	0.01	1.42
-34	150.625	20191210	19	2019-12-11 05:00:01	0.63	1219.08	0.26	0.01	1.42
-34	150.625	20191210	20	2019-12-11 06:00:01	0.55	1157.48	0.23	0.01	1.42
-34	150.625	20191210	21	2019-12-11 07:00:01	0.53	1139.08	0.22	0.01	1.42
-34	150.625	20191210	22	2019-12-11 08:00:01	0.63	1240.79	0.21	0.01	1.41
-34	150.625	20191210	23	2019-12-11 09:00:01	1.05	1878.65	0.26	0.02	1.41
-34	150.625	20191211	0	2019-12-11 10:00:01	2.05	5097.73	0.55	0.05	1.4
-34	150.625	20191211	1	2019-12-11 11:00:01	3.19	8716.83	0.87	0.08	1.4
-34	150.625	20191211	2	2019-12-11 12:00:01	4.15	11482.5	1.15	0.11	1.4
-34	150.625	20191211	3	2019-12-11 13:00:01	2.21	8046.89	0.81	0.07	1.4
-34	150.625	20191211	4	2019-12-11 14:00:01	2.69	10986.9	1.12	0.1	1.4
-34	150.625	20191211	5	2019-12-11 15:00:01	2.51	10950.9	1.15	0.1	1.4
-34	150.625	20191211	6	2019-12-11 16:00:01	2.58	10492.8	1.15	0.1	1.41
-34	150.625	20191211	7	2019-12-11 17:00:01	2.31	7981.93	0.94	0.08	1.41
-34	150.625	20191211	8	2019-12-11 18:00:01	1.99	5776.92	0.78	0.06	1.42
-34	150.625	20191211	9	2019-12-11 19:00:01	1.69	4359.88	0.7	0.04	1.43
-34	150.625	20191211	10	2019-12-11 20:00:01	1.44	3488.91	0.63	0.03	1.43
-34	150.625	20191211	11	2019-12-11 21:00:01	1.19	2857.42	0.51	0.03	1.43
-34	150.625	20191211	12	2019-12-11 22:00:01	1.01	2398.55	0.47	0.02	1.43
-34	150.625	20191211	13	2019-12-11 23:00:01	0.92	2100.01	0.45	0.02	1.43
-34	150.625	20191211	14	2019-12-12 00:00:01	0.9	1888.72	0.4	0.02	1.44
-34	150.625	20191211	15	2019-12-12 01:00:01	0.96	1754.26	0.4	0.02	1.44
-34	150.625	20191211	16	2019-12-12 02:00:01	1.01	1675.94	0.41	0.02	1.44
-34	150.625	20191211	17	2019-12-12 03:00:01	1.11	1616.02	0.39	0.02	1.44
-34	150.625	20191211	18	2019-12-12 04:00:01	1.19	1565.43	0.4	0.02	1.45
-34	150.625	20191211	19	2019-12-12 05:00:01	1	1516.56	0.39	0.02	1.45
-34	150.625	20191211	20	2019-12-12 06:00:01	0.59	1445.64	0.33	0.01	1.43
-34	150.625	20191211	21	2019-12-12 07:00:01	0.59	1393.19	0.29	0.01	1.42
-34	150.625	20191211	22	2019-12-12 08:00:01	0.66	1458.28	0.28	0.01	1.42
-34	150.625	20191211	23	2019-12-12 09:00:01	0.83	1841.54	0.33	0.02	1.43
-34	150.625	20191212	0	2019-12-12 10:00:01	1.18	3321.16	0.47	0.03	1.42
-34	150.625	20191212	1	2019-12-12 11:00:01	1.53	4451.42	0.57	0.04	1.41
-34	150.625	20191212	2	2019-12-12 12:00:01	1.82	5555.43	0.67	0.05	1.41
-34	150.625	20191212	3	2019-12-12 13:00:01	1.95	6850.6	0.78	0.06	1.4
-34	150.625	20191212	4	2019-12-12 14:00:01	2.04	7591.44	0.86	0.07	1.4
-34	150.625	20191212	5	2019-12-12 15:00:01	1.83	7123.77	0.83	0.07	1.41
-34	150.625	20191212	6	2019-12-12 16:00:01	1.56	6195.78	0.79	0.06	1.41
-34	150.625	20191212	7	2019-12-12 17:00:01	1.31	5156.44	0.76	0.05	1.42
-34	150.625	20191212	8	2019-12-12 18:00:01	1.07	4070.63	0.65	0.04	1.43
-34	150.625	20191212	9	2019-12-12 19:00:01	0.85	3129.69	0.58	0.03	1.43
-34	150.625	20191212	10	2019-12-12 20:00:01	0.69	2535.89	0.53	0.03	1.44
-34	150.625	20191212	11	2019-12-12 21:00:01	0.57	2166.02	0.49	0.02	1.45
-34	150.625	20191212	12	2019-12-12 22:00:01	0.5	1912.16	0.47	0.02	1.46
-34	150.625	20191212	13	2019-12-12 23:00:01	0.5	1731.74	0.44	0.02	1.46
-34	150.625	20191212	14	2019-12-13 00:00:01	0.49	1572.77	0.38	0.02	1.45
-34	150.625	20191212	15	2019-12-13 01:00:01	0.52	1421.67	0.33	0.01	1.45
-34	150.625	20191212	16	2019-12-13 02:00:01	0.6	1278.38	0.3	0.01	1.46
-34	150.625	20191212	17	2019-12-13 03:00:01	0.71	1147.56	0.27	0.01	1.46
-34	150.625	20191212	18	2019-12-13 04:00:01	0.73	1048.2	0.26	0.01	1.46
-34	150.625	20191212	19	2019-12-13 05:00:01	0.69	985.11	0.25	0.01	1.47
-34	150.625	20191212	20	2019-12-13 06:00:01	0.43	940.38	0.23	0.01	1.48
-34	150.625	20191212	21	2019-12-13 07:00:01	0.38	928.18	0.23	0.01	1.49
-34	150.625	20191212	22	2019-12-13 08:00:01	0.4	968.32	0.24	0.01	1.48
-34	150.625	20191212	23	2019-12-13 09:00:01	0.48	1147.64	0.27	0.01	1.48
-34	150.625	20191213	0	2019-12-13 10:00:01	0.7	1820.65	0.41	0.02	1.47
-34	150.625	20191213	1	2019-12-13 11:00:01	1	2792.63	0.57	0.03	1.46
-34	150.625	20191213	2	2019-12-13 12:00:01	1.3	4170.51	0.72	0.04	1.45
-34	150.625	20191213	3	2019-12-13 13:00:01	1.53	5669.83	0.82	0.06	1.43
-34	150.625	20191213	4	2019-12-13 14:00:01	1.57	6733.15	0.91	0.07	1.42
-34	150.625	20191213	5	2019-12-13 15:00:01	1.38	6800.86	0.88	0.07	1.42
-34	150.625	20191213	6	2019-12-13 16:00:01	1.11	6192.57	0.83	0.06	1.42
-34	150.625	20191213	7	2019-12-13 17:00:01	0.87	5296.01	0.77	0.05	1.43
-34	150.625	20191213	8	2019-12-13 18:00:01	0.69	4299.28	0.67	0.04	1.44
-34	150.625	20191213	9	2019-12-13 19:00:01	0.61	3322.63	0.61	0.03	1.44
-34	150.625	20191213	10	2019-12-13 20:00:01	0.59	2547.27	0.55	0.03	1.46
-34	150.625	20191213	11	2019-12-13 21:00:01	0.63	2014.25	0.49	0.02	1.47
-34	150.625	20191213	12	2019-12-13 22:00:01	0.78	1680.58	0.45	0.02	1.48
-34	150.625	20191213	13	2019-12-13 23:00:01	0.97	1450.3	0.38	0.02	1.47
-34	150.625	20191213	14	2019-12-14 00:00:01	1.13	1312.84	0.31	0.01	1.46
-34	150.625	20191213	15	2019-12-14 01:00:01	1.28	1276.67	0.27	0.01	1.46
-34	150.625	20191213	16	2019-12-14 02:00:01	1.46	1284.65	0.25	0.01	1.45
-34	150.625	20191213	17	2019-12-14 03:00:01	1.73	1314.71	0.24	0.01	1.44
-34	150.625	20191213	18	2019-12-14 04:00:01	2.12	1354.45	0.23	0.01	1.44
-34	150.625	20191213	19	2019-12-14 05:00:01	2.47	1400.83	0.22	0.01	1.43
-34	150.625	20191213	20	2019-12-14 06:00:01	1.64	1419.17	0.2	0.01	1.42
-34	150.625	20191213	21	2019-12-14 07:00:01	1.12	1427.96	0.19	0.01	1.42
-34	150.625	20191213	22	2019-12-14 08:00:01	0.89	1426.37	0.18	0.01	1.43
-34	150.625	20191213	23	2019-12-14 09:00:01	0.76	1462.7	0.16	0.01	1.42
-34	150.625	20191214	0	2019-12-14 10:00:01	1.48	4184.12	0.41	0.04	1.41
-34	150.625	20191214	1	2019-12-14 11:00:01	3.44	9030.92	0.83	0.08	1.4
-34	150.625	20191214	2	2019-12-14 12:00:01	5.55	15564.9	1.4	0.14	1.4
-34	150.625	20191214	3	2019-12-14 13:00:01	3.24	9857.75	0.91	0.09	1.4
-34	150.625	20191214	4	2019-12-14 14:00:01	4.94	16034.1	1.48	0.15	1.41
-34	150.625	20191214	5	2019-12-14 15:00:01	5.18	17903.9	1.68	0.17	1.41
-34	150.625	20191214	6	2019-12-14 16:00:01	4.01	15210.3	1.46	0.14	1.41
-34	150.625	20191214	7	2019-12-14 17:00:01	2.75	10985	1.11	0.1	1.41
-34	150.625	20191214	8	2019-12-14 18:00:01	1.94	7095.7	0.8	0.07	1.41
-34	150.625	20191214	9	2019-12-14 19:00:01	1.5	4672.42	0.69	0.05	1.43
-34	150.625	20191214	10	2019-12-14 20:00:01	1.31	3395.42	0.56	0.03	1.44
-34	150.625	20191214	11	2019-12-14 21:00:01	1.35	2687.6	0.44	0.03	1.43
-34	150.625	20191214	12	2019-12-14 22:00:01	1.45	2237.47	0.41	0.02	1.44
-34	150.625	20191214	13	2019-12-14 23:00:01	1.37	1930.86	0.4	0.02	1.45
-34	150.625	20191214	14	2019-12-15 00:00:01	1.27	1678.17	0.37	0.02	1.47
-34	150.625	20191214	15	2019-12-15 01:00:01	1.31	1451.88	0.35	0.02	1.47
-34	150.625	20191214	16	2019-12-15 02:00:01	1.41	1291.53	0.32	0.01	1.46
-34	150.625	20191214	17	2019-12-15 03:00:01	1.6	1251.67	0.29	0.01	1.46
-34	150.625	20191214	18	2019-12-15 04:00:01	1.75	1253.14	0.3	0.01	1.47
-34	150.625	20191214	19	2019-12-15 05:00:01	1.78	1316.5	0.29	0.01	1.46
-34	150.625	20191214	20	2019-12-15 06:00:01	1.42	1430.46	0.25	0.01	1.44
-34	150.625	20191214	21	2019-12-15 07:00:01	1.34	1641.43	0.25	0.02	1.44
-34	150.625	20191214	22	2019-12-15 08:00:01	1.4	2062.58	0.29	0.02	1.43
-34	150.625	20191214	23	2019-12-15 09:00:01	1.74	2975.7	0.34	0.03	1.41
-34	150.625	20191215	0	2019-12-15 10:00:01	4.42	9168.42	0.89	0.09	1.41
-34	150.625	20191215	1	2019-12-15 11:00:01	9.04	20583	1.88	0.19	1.41
-34	150.625	20191215	2	2019-12-15 12:00:01	13.35	33041	3	0.31	1.4
-34	150.625	20191215	3	2019-12-15 13:00:01	16.71	43740.5	3.93	0.41	1.4
-34	150.625	20191215	4	2019-12-15 14:00:01	19.37	46050.2	4.03	0.43	1.4
-34	150.625	20191215	5	2019-12-15 15:00:01	19.24	34576.1	2.98	0.32	1.4
-34	150.625	20191215	6	2019-12-15 16:00:01	15.31	18184.4	1.54	0.17	1.41
-34	150.625	20191215	7	2019-12-15 17:00:01	10.8	8648.21	0.74	0.08	1.41
-34	150.625	20191215	8	2019-12-15 18:00:01	7.37	5005.6	0.44	0.05	1.42
-34	150.625	20191215	9	2019-12-15 19:00:01	4.95	3484.55	0.31	0.03	1.42
-34	150.625	20191215	10	2019-12-15 20:00:01	3.65	2759.41	0.24	0.03	1.42
-34	150.625	20191215	11	2019-12-15 21:00:01	2.86	2132.75	0.19	0.02	1.42
-34	150.625	20191215	12	2019-12-15 22:00:01	2.47	1622.79	0.15	0.02	1.42
-34	150.625	20191215	13	2019-12-15 23:00:01	2.29	1318.8	0.12	0.01	1.42
-34	150.625	20191215	14	2019-12-16 00:00:01	1.97	1079.12	0.1	0.01	1.42
-34	150.625	20191215	15	2019-12-16 01:00:01	1.78	903.44	0.09	0.01	1.42
-34	150.625	20191215	16	2019-12-16 02:00:01	2.14	848.53	0.08	0.01	1.42
-34	150.625	20191215	17	2019-12-16 03:00:01	2.78	906.83	0.09	0.01	1.42
-34	150.625	20191215	18	2019-12-16 04:00:01	3.39	1008.19	0.1	0.01	1.42
-34	150.625	20191215	19	2019-12-16 05:00:01	3.35	1085.53	0.11	0.01	1.42
-34	150.625	20191215	20	2019-12-16 06:00:01	1.42	1014.49	0.12	0.01	1.42
-34	150.625	20191215	21	2019-12-16 07:00:01	0.64	895.32	0.12	0.01	1.42
-34	150.625	20191215	22	2019-12-16 08:00:01	0.6	1055.46	0.13	0.01	1.42
-34	150.625	20191215	23	2019-12-16 09:00:01	1.08	2129.64	0.24	0.02	1.41
-34	150.625	20191216	0	2019-12-16 10:00:01	1.88	4241.25	0.44	0.04	1.41
-34	150.625	20191216	1	2019-12-16 11:00:01	3.55	9060.26	0.9	0.08	1.4
-34	150.625	20191216	2	2019-12-16 12:00:01	4.8	13642.6	1.33	0.13	1.4
-34	150.625	20191216	3	2019-12-16 13:00:01	3.01	9343.75	0.92	0.09	1.4
-34	150.625	20191216	4	2019-12-16 14:00:01	4.1	14224.3	1.43	0.13	1.4
-34	150.625	20191216	5	2019-12-16 15:00:01	3.66	14202.2	1.5	0.13	1.41
-34	150.625	20191216	6	2019-12-16 16:00:01	2.57	11565	1.35	0.11	1.41
-34	150.625	20191216	7	2019-12-16 17:00:01	1.8	9107.88	1.18	0.09	1.42
-34	150.625	20191216	8	2019-12-16 18:00:01	1.36	7270.37	0.99	0.07	1.42
-34	150.625	20191216	9	2019-12-16 19:00:01	1.15	5850.58	0.88	0.06	1.42
-34	150.625	20191216	10	2019-12-16 20:00:01	1.04	4627.71	0.79	0.05	1.42
-34	150.625	20191216	11	2019-12-16 21:00:01	0.94	3629.49	0.64	0.04	1.42
-34	150.625	20191216	12	2019-12-16 22:00:01	0.94	2900.35	0.51	0.03	1.42
-34	150.625	20191216	13	2019-12-16 23:00:01	1.17	2402.74	0.42	0.02	1.42
-34	150.625	20191216	14	2019-12-17 00:00:01	1.3	2052.34	0.35	0.02	1.43
-34	150.625	20191216	15	2019-12-17 01:00:01	1.38	1842.94	0.31	0.02	1.43
-34	150.625	20191216	16	2019-12-17 02:00:01	1.39	1741.87	0.28	0.02	1.43
-34	150.625	20191216	17	2019-12-17 03:00:01	1.57	1710.46	0.26	0.02	1.43
-34	150.625	20191216	18	2019-12-17 04:00:01	1.87	1707.23	0.24	0.02	1.42
-34	150.625	20191216	19	2019-12-17 05:00:01	1.7	1724.19	0.24	0.02	1.42
-34	150.625	20191216	20	2019-12-17 06:00:01	0.76	1720.84	0.22	0.02	1.41
-34	150.625	20191216	21	2019-12-17 07:00:01	0.64	1727.97	0.2	0.02	1.41
-34	150.625	20191216	22	2019-12-17 08:00:01	0.74	1827.11	0.2	0.02	1.41
-34	150.625	20191216	23	2019-12-17 09:00:01	1.16	2333.47	0.23	0.02	1.4
-34	150.625	20191217	0	2019-12-17 10:00:01	1.71	3298.55	0.3	0.03	1.4
-34	150.625	20191217	1	2019-12-17 11:00:01	2.57	5515.92	0.48	0.05	1.4
-34	150.625	20191217	2	2019-12-17 12:00:01	3.2	7320.24	0.62	0.07	1.4
-34	150.625	20191217	3	2019-12-17 13:00:01	2.64	6154.1	0.52	0.06	1.4
-34	150.625	20191217	4	2019-12-17 14:00:01	3.31	7778.56	0.65	0.07	1.4
-34	150.625	20191217	5	2019-12-17 15:00:01	3.27	7890.7	0.64	0.07	1.4
-34	150.625	20191217	6	2019-12-17 16:00:01	2.93	7384.38	0.59	0.07	1.4
-34	150.625	20191217	7	2019-12-17 17:00:01	2.55	6725.39	0.52	0.06	1.4
-34	150.625	20191217	8	2019-12-17 18:00:01	2.14	5908.08	0.45	0.06	1.4
-34	150.625	20191217	9	2019-12-17 19:00:01	2.09	5243.38	0.4	0.05	1.41
-34	150.625	20191217	10	2019-12-17 20:00:01	2.34	4718.09	0.37	0.04	1.41
-34	150.625	20191217	11	2019-12-17 21:00:01	2.5	4261.99	0.35	0.04	1.41
-34	150.625	20191217	12	2019-12-17 22:00:01	2.73	3986.67	0.34	0.04	1.41
-34	150.625	20191217	13	2019-12-17 23:00:01	2.97	3934.81	0.34	0.04	1.41
-34	150.625	20191217	14	2019-12-18 00:00:01	3.11	4048.53	0.34	0.04	1.41
-34	150.625	20191217	15	2019-12-18 01:00:01	3.3	4287.01	0.35	0.04	1.4
-34	150.625	20191217	16	2019-12-18 02:00:01	3.58	4627.49	0.37	0.04	1.4
-34	150.625	20191217	17	2019-12-18 03:00:02	3.94	5083.82	0.39	0.05	1.4
-34	150.625	20191217	18	2019-12-18 04:00:02	4.29	5475.48	0.42	0.05	1.4
-34	150.625	20191217	19	2019-12-18 05:00:02	4.57	5657.6	0.44	0.05	1.4
-34	150.625	20191217	20	2019-12-18 06:00:02	3.37	5695.13	0.44	0.05	1.41
-34	150.625	20191217	21	2019-12-18 07:00:02	2.03	5669.91	0.44	0.05	1.41
-34	150.625	20191217	22	2019-12-18 08:00:02	1.52	5688.88	0.44	0.05	1.41
-34	150.625	20191217	23	2019-12-18 09:00:02	1.37	5944.12	0.47	0.06	1.41
-34	150.625	20191218	0	2019-12-18 10:00:02	3.04	8005.26	0.64	0.08	1.41
-34	150.625	20191218	1	2019-12-18 11:00:02	7.81	17236.9	1.38	0.16	1.4
-34	150.625	20191218	2	2019-12-18 12:00:02	12.84	29880.4	2.38	0.28	1.4
-34	150.625	20191218	3	2019-12-18 13:00:02	6.89	18165.7	1.45	0.17	1.4
-34	150.625	20191218	4	2019-12-18 14:00:02	11.96	33664.4	2.69	0.31	1.4
-34	150.625	20191218	5	2019-12-18 15:00:02	14.37	45959.1	3.72	0.43	1.4
-34	150.625	20191218	6	2019-12-18 16:00:02	12.94	47240.8	3.9	0.44	1.4
-34	150.625	20191218	7	2019-12-18 17:00:02	12.87	47449.6	3.95	0.44	1.4
-34	150.625	20191218	8	2019-12-18 18:00:02	12.92	44648.3	3.72	0.41	1.4
-34	150.625	20191218	9	2019-12-18 19:00:02	14.32	40848.6	3.38	0.38	1.4
-34	150.625	20191218	10	2019-12-18 20:00:02	18.15	36676.4	3.01	0.34	1.4
-34	150.625	20191218	11	2019-12-18 21:00:02	26.29	32489.5	2.65	0.3	1.4
-34	150.625	20191218	12	2019-12-18 22:00:02	38.43	28637.8	2.33	0.27	1.4
-34	150.625	20191218	13	2019-12-18 23:00:02	50.76	25605.7	2.07	0.24	1.4
-34	150.625	20191218	14	2019-12-19 00:00:02	60.1	23889	1.92	0.22	1.4
-34	150.625	20191218	15	2019-12-19 01:00:02	65.16	23248.5	1.85	0.22	1.4
-34	150.625	20191218	16	2019-12-19 02:00:02	66.01	22259.5	1.75	0.21	1.4
-34	150.625	20191218	17	2019-12-19 03:00:02	64.09	20844.6	1.62	0.19	1.4
-34	150.625	20191218	18	2019-12-19 04:00:02	58.89	19026	1.47	0.18	1.4
-34	150.625	20191218	19	2019-12-19 05:00:02	49.83	16464	1.26	0.15	1.4
-34	150.625	20191218	20	2019-12-19 06:00:02	39.84	13549.5	1.02	0.13	1.4
-34	150.625	20191218	21	2019-12-19 07:00:02	29.61	10989.4	0.8	0.1	1.4
-34	150.625	20191218	22	2019-12-19 08:00:02	14	9641.48	0.69	0.09	1.4
-34	150.625	20191218	23	2019-12-19 09:00:02	4.83	10011.8	0.73	0.09	1.4
-34	150.625	20191219	0	2019-12-19 10:00:02	6.02	15780.2	1.24	0.15	1.41
-34	150.625	20191219	1	2019-12-19 11:00:02	9.1	24132.3	1.92	0.23	1.41
-34	150.625	20191219	2	2019-12-19 12:00:02	11.03	32872.1	2.74	0.31	1.41
-34	150.625	20191219	3	2019-12-19 13:00:02	4.18	15599.7	1.46	0.15	1.42
-34	150.625	20191219	4	2019-12-19 14:00:02	6.37	24465.9	2.39	0.23	1.41
-34	150.625	20191219	5	2019-12-19 15:00:02	6.5	26269	2.61	0.25	1.41
-34	150.625	20191219	6	2019-12-19 16:00:02	5.49	23467.6	2.19	0.22	1.41
-34	150.625	20191219	7	2019-12-19 17:00:02	5.23	20025.3	1.8	0.19	1.4
-34	150.625	20191219	8	2019-12-19 18:00:02	4.59	16627.9	1.5	0.16	1.4
-34	150.625	20191219	9	2019-12-19 19:00:02	3.78	14083.6	1.29	0.13	1.4
-34	150.625	20191219	10	2019-12-19 20:00:02	3.41	12459.6	1.15	0.12	1.4
-34	150.625	20191219	11	2019-12-19 21:00:02	3.54	11275.2	1.04	0.1	1.4
-34	150.625	20191219	12	2019-12-19 22:00:02	4.47	10191.7	0.94	0.09	1.4
-34	150.625	20191219	13	2019-12-19 23:00:02	5.3	9160.59	0.84	0.09	1.4
-34	150.625	20191219	14	2019-12-20 00:00:02	5.56	8207.92	0.75	0.08	1.4
-34	150.625	20191219	15	2019-12-20 01:00:02	5.68	7456.38	0.68	0.07	1.4
-34	150.625	20191219	16	2019-12-20 02:00:02	5.88	6916.97	0.63	0.06	1.4
-34	150.625	20191219	17	2019-12-20 03:00:02	6.23	6470.66	0.58	0.06	1.4
-34	150.625	20191219	18	2019-12-20 04:00:02	6.58	5998.25	0.55	0.06	1.41
-34	150.625	20191219	19	2019-12-20 05:00:02	6.44	5490.39	0.51	0.05	1.41
-34	150.625	20191219	20	2019-12-20 06:00:02	3.15	4969.49	0.46	0.05	1.41
-34	150.625	20191219	21	2019-12-20 07:00:02	1.72	4543.38	0.41	0.04	1.41
-34	150.625	20191219	22	2019-12-20 08:00:02	1.7	4441.5	0.4	0.04	1.4
-34	150.625	20191219	23	2019-12-20 09:00:02	2.73	5200.67	0.47	0.05	1.4
-34	150.625	20191220	0	2019-12-20 10:00:02	4.13	6674.78	0.61	0.06	1.4
-34	150.625	20191220	1	2019-12-20 11:00:02	7.81	14181.6	1.26	0.13	1.4
-34	150.625	20191220	2	2019-12-20 12:00:02	10.83	23659.6	2.06	0.22	1.4
-34	150.625	20191220	3	2019-12-20 13:00:02	5.03	14447.6	1.24	0.13	1.4
-34	150.625	20191220	4	2019-12-20 14:00:02	7.92	24119.6	2.09	0.22	1.4
-34	150.625	20191220	5	2019-12-20 15:00:02	7.57	27666.1	2.4	0.26	1.4
-34	150.625	20191220	6	2019-12-20 16:00:02	2.74	14461.6	1.25	0.13	1.4
-34	150.625	20191220	7	2019-12-20 17:00:02	2.51	15319	1.32	0.14	1.4
-34	150.625	20191220	8	2019-12-20 18:00:02	2.3	15567.2	1.34	0.14	1.4
-34	150.625	20191220	9	2019-12-20 19:00:02	2.51	15694.2	1.35	0.15	1.4
-34	150.625	20191220	10	2019-12-20 20:00:02	2.54	15335.9	1.32	0.14	1.4
-34	150.625	20191220	11	2019-12-20 21:00:02	3.12	14598.7	1.26	0.14	1.4
-34	150.625	20191220	12	2019-12-20 22:00:02	4.24	13971	1.21	0.13	1.4
-34	150.625	20191220	13	2019-12-20 23:00:02	5.23	13546	1.18	0.13	1.4
-34	150.625	20191220	14	2019-12-21 00:00:02	5.66	13307.8	1.16	0.12	1.4
-34	150.625	20191220	15	2019-12-21 01:00:02	6.28	13223.3	1.15	0.12	1.4
-34	150.625	20191220	16	2019-12-21 02:00:02	7.38	13202.6	1.15	0.12	1.4
-34	150.625	20191220	17	2019-12-21 03:00:02	8.88	13189.7	1.15	0.12	1.4
-34	150.625	20191220	18	2019-12-21 04:00:02	10.57	12887.6	1.13	0.12	1.4
-34	150.625	20191220	19	2019-12-21 05:00:02	12.32	12034.2	1.07	0.11	1.4
-34	150.625	20191220	20	2019-12-21 06:00:02	13.21	10723.6	0.95	0.1	1.4
-34	150.625	20191220	21	2019-12-21 07:00:02	12.02	9781.12	0.85	0.09	1.4
-34	150.625	20191220	22	2019-12-21 08:00:02	9.66	9789.09	0.83	0.09	1.4
-34	150.625	20191220	23	2019-12-21 09:00:02	8.87	10947.9	0.9	0.1	1.4
-34	150.625	20191221	0	2019-12-21 10:00:02	12.19	22052	1.76	0.2	1.4
-34	150.625	20191221	1	2019-12-21 11:00:02	22.08	49223.6	3.86	0.46	1.4
-34	150.625	20191221	2	2019-12-21 12:00:02	31.8	80486.8	6.35	0.75	1.4
-34	150.625	20191221	3	2019-12-21 13:00:02	8.71	31225.6	2.61	0.29	1.4
-34	150.625	20191221	4	2019-12-21 14:00:02	18.44	62369.1	5.11	0.58	1.4
-34	150.625	20191221	5	2019-12-21 15:00:02	28.96	76310.7	6.26	0.71	1.4
-34	150.625	20191221	6	2019-12-21 16:00:02	29.41	65133.5	5.46	0.61	1.4
-34	150.625	20191221	7	2019-12-21 17:00:02	16.72	38773.8	3.38	0.36	1.4
-34	150.625	20191221	8	2019-12-21 18:00:02	8.08	24075.5	2.25	0.23	1.4
-34	150.625	20191221	9	2019-12-21 19:00:02	5.37	19958.8	1.98	0.19	1.41
-34	150.625	20191221	10	2019-12-21 20:00:02	4.24	15017.4	1.55	0.14	1.4
-34	150.625	20191221	11	2019-12-21 21:00:02	3.19	9496.55	1.02	0.09	1.4
-34	150.625	20191221	12	2019-12-21 22:00:02	2.56	6440.59	0.71	0.06	1.41
-34	150.625	20191221	13	2019-12-21 23:00:02	2.18	5222.41	0.61	0.05	1.41
-34	150.625	20191221	14	2019-12-22 00:00:02	1.69	4484.32	0.58	0.04	1.42
-34	150.625	20191221	15	2019-12-22 01:00:02	1.36	3887.55	0.55	0.04	1.43
-34	150.625	20191221	16	2019-12-22 02:00:02	1.21	3341.17	0.51	0.03	1.43
-34	150.625	20191221	17	2019-12-22 03:00:02	1.2	2957.1	0.44	0.03	1.42
-34	150.625	20191221	18	2019-12-22 04:00:02	1.21	2809.73	0.42	0.03	1.42
-34	150.625	20191221	19	2019-12-22 05:00:02	1.13	2728.36	0.41	0.03	1.42
-34	150.625	20191221	20	2019-12-22 06:00:02	0.9	2593	0.39	0.03	1.43
-34	150.625	20191221	21	2019-12-22 07:00:02	0.88	2932.92	0.41	0.03	1.43
-34	150.625	20191221	22	2019-12-22 08:00:02	1.23	3851.68	0.54	0.04	1.45
-34	150.625	20191221	23	2019-12-22 09:00:02	2.74	5548.33	0.73	0.06	1.44
-34	150.625	20191222	0	2019-12-22 10:00:02	4.38	8817.4	1.03	0.08	1.42
-34	150.625	20191222	1	2019-12-22 11:00:02	7.91	17590.5	1.89	0.17	1.41
-34	150.625	20191222	2	2019-12-22 12:00:02	10.8	24728.7	2.53	0.23	1.41
-34	150.625	20191222	3	2019-12-22 13:00:02	14.13	31314.2	3.17	0.29	1.41
-34	150.625	20191222	4	2019-12-22 14:00:02	14.28	33801.7	3.43	0.32	1.41
-34	150.625	20191222	5	2019-12-22 15:00:02	11.87	33473.2	3.42	0.32	1.41
-34	150.625	20191222	6	2019-12-22 16:00:02	2.5	13216.5	1.3	0.13	1.41
-34	150.625	20191222	7	2019-12-22 17:00:02	2.72	15218.1	1.53	0.14	1.41
-34	150.625	20191222	8	2019-12-22 18:00:02	2.25	13903.2	1.44	0.13	1.41
-34	150.625	20191222	9	2019-12-22 19:00:02	1.74	11638.3	1.23	0.11	1.41
-34	150.625	20191222	10	2019-12-22 20:00:02	1.34	9346.77	0.99	0.09	1.42
-34	150.625	20191222	11	2019-12-22 21:00:02	1.14	7797.1	0.85	0.08	1.42
-34	150.625	20191222	12	2019-12-22 22:00:02	1.65	7015.57	0.74	0.07	1.42
-34	150.625	20191222	13	2019-12-22 23:00:02	2.38	6861.48	0.69	0.07	1.41
-34	150.625	20191222	14	2019-12-23 00:00:02	2.52	7070	0.7	0.07	1.41
-34	150.625	20191222	15	2019-12-23 01:00:02	2.37	7086.82	0.71	0.07	1.41
-34	150.625	20191222	16	2019-12-23 02:00:02	2.26	6876.68	0.71	0.07	1.41
-34	150.625	20191222	17	2019-12-23 03:00:02	2.5	6478.8	0.69	0.06	1.42
-34	150.625	20191222	18	2019-12-23 04:00:02	2.88	5857.55	0.67	0.06	1.43
-34	150.625	20191222	19	2019-12-23 05:00:02	3.03	5244.41	0.66	0.05	1.43
-34	150.625	20191222	20	2019-12-23 06:00:02	1.77	4865.91	0.68	0.05	1.43
-34	150.625	20191222	21	2019-12-23 07:00:02	1.21	4801.98	0.71	0.05	1.43
-34	150.625	20191222	22	2019-12-23 08:00:02	1.3	5066.18	0.71	0.05	1.43
-34	150.625	20191222	23	2019-12-23 09:00:02	2.08	6318.16	0.78	0.06	1.42
-34	150.625	20191223	0	2019-12-23 10:00:02	3.38	8685.85	0.98	0.08	1.41
-34	150.625	20191223	1	2019-12-23 11:00:02	4.46	11376.2	1.23	0.11	1.41
-34	150.625	20191223	2	2019-12-23 12:00:02	5.55	14501.8	1.52	0.14	1.41
-34	150.625	20191223	3	2019-12-23 13:00:02	1.99	6487.08	0.65	0.06	1.4
-34	150.625	20191223	4	2019-12-23 14:00:02	2.93	10227.4	1.01	0.1	1.4
-34	150.625	20191223	5	2019-12-23 15:00:02	3.12	12420.7	1.22	0.12	1.4
-34	150.625	20191223	6	2019-12-23 16:00:02	2.71	13500.4	1.34	0.13	1.4
-34	150.625	20191223	7	2019-12-23 17:00:02	2.15	14057.1	1.41	0.13	1.4
-34	150.625	20191223	8	2019-12-23 18:00:02	1.68	14158.3	1.46	0.13	1.41
-34	150.625	20191223	9	2019-12-23 19:00:02	1.48	13997.6	1.48	0.13	1.41
-34	150.625	20191223	10	2019-12-23 20:00:02	1.51	13569.5	1.48	0.13	1.41
-34	150.625	20191223	11	2019-12-23 21:00:02	1.53	12693.6	1.45	0.12	1.41
-34	150.625	20191223	12	2019-12-23 22:00:02	1.7	11493.2	1.39	0.11	1.41
-34	150.625	20191223	13	2019-12-23 23:00:02	1.91	10151.4	1.28	0.1	1.41
-34	150.625	20191223	14	2019-12-24 00:00:02	1.98	8910.51	1.14	0.09	1.42
-34	150.625	20191223	15	2019-12-24 01:00:02	2.03	7874.89	1.04	0.08	1.42
-34	150.625	20191223	16	2019-12-24 02:00:02	2.06	7144.8	0.94	0.07	1.42
-34	150.625	20191223	17	2019-12-24 03:00:02	2.11	6738.77	0.85	0.06	1.42
-34	150.625	20191223	18	2019-12-24 04:00:02	2.08	6310.33	0.84	0.06	1.42
-34	150.625	20191223	19	2019-12-24 05:00:02	1.95	5863.31	0.81	0.06	1.42
-34	150.625	20191223	20	2019-12-24 06:00:02	1.11	5584.03	0.79	0.05	1.42
-34	150.625	20191223	21	2019-12-24 07:00:02	0.7	5444.18	0.84	0.05	1.43
-34	150.625	20191223	22	2019-12-24 08:00:02	0.78	5340.16	0.87	0.05	1.43
-34	150.625	20191223	23	2019-12-24 09:00:02	1.04	5363.13	0.9	0.05	1.44
-34	150.625	20191224	0	2019-12-24 10:00:02	0.71	9071.96	1.2	0.09	1.42
-34	150.625	20191224	1	2019-12-24 11:00:02	1	8077.91	1.09	0.08	1.42
-34	150.625	20191224	2	2019-12-24 12:00:02	1.09	6530.3	0.88	0.06	1.42
-34	150.625	20191224	3	2019-12-24 13:00:02	1.19	6545.77	0.98	0.06	1.43
-34	150.625	20191224	4	2019-12-24 14:00:02	1.13	6097.13	0.94	0.06	1.43
-34	150.625	20191224	5	2019-12-24 15:00:02	0.95	5777.19	0.87	0.06	1.43
-34	150.625	20191224	6	2019-12-24 16:00:02	0.78	5523.64	0.83	0.05	1.42
-34	150.625	20191224	7	2019-12-24 17:00:02	0.68	5285.05	0.75	0.05	1.42
-34	150.625	20191224	8	2019-12-24 18:00:02	0.65	5030.08	0.7	0.05	1.42
-34	150.625	20191224	9	2019-12-24 19:00:02	0.71	4723.03	0.68	0.05	1.43
-34	150.625	20191224	10	2019-12-24 20:00:02	1.06	4523.33	0.67	0.04	1.43
-34	150.625	20191224	11	2019-12-24 21:00:02	1.1	4385.56	0.6	0.04	1.43
-34	150.625	20191224	12	2019-12-24 22:00:02	0.87	4326.15	0.54	0.04	1.42
-34	150.625	20191224	13	2019-12-24 23:00:02	0.72	4259.29	0.49	0.04	1.41
-34	150.625	20191224	14	2019-12-25 00:00:02	0.59	4240.75	0.47	0.04	1.41
-34	150.625	20191224	15	2019-12-25 01:00:02	0.59	4259.34	0.5	0.04	1.41
-34	150.625	20191224	16	2019-12-25 02:00:02	0.63	4290.76	0.53	0.04	1.42
-34	150.625	20191224	17	2019-12-25 03:00:02	0.69	4325.97	0.55	0.04	1.42
-34	150.625	20191224	18	2019-12-25 04:00:02	0.75	4364.01	0.57	0.04	1.42
-34	150.625	20191224	19	2019-12-25 05:00:02	0.81	4370.93	0.58	0.04	1.42
-34	150.625	20191224	20	2019-12-25 06:00:02	0.52	4293.19	0.56	0.04	1.42
-34	150.625	20191224	21	2019-12-25 07:00:02	0.35	4094.02	0.53	0.04	1.42
-34	150.625	20191224	22	2019-12-25 08:00:02	0.35	3911.51	0.54	0.04	1.42
-34	150.625	20191224	23	2019-12-25 09:00:02	0.44	3818.91	0.56	0.04	1.43
-34	150.625	20191225	0	2019-12-25 10:00:02	0.6	3314.8	0.53	0.03	1.44
-34	150.625	20191225	1	2019-12-25 11:00:02	0.91	3793.83	0.64	0.04	1.44
-34	150.625	20191225	2	2019-12-25 12:00:02	1.13	4185.6	0.69	0.04	1.44
-34	150.625	20191225	3	2019-12-25 13:00:02	0.92	3223.4	0.58	0.03	1.45
-34	150.625	20191225	4	2019-12-25 14:00:02	1.08	3792.89	0.67	0.04	1.44
-34	150.625	20191225	5	2019-12-25 15:00:02	1.03	4247.29	0.7	0.04	1.43
-34	150.625	20191225	6	2019-12-25 16:00:02	0.92	4721.61	0.73	0.05	1.43
-34	150.625	20191225	7	2019-12-25 17:00:02	0.82	5142.39	0.77	0.05	1.42
-34	150.625	20191225	8	2019-12-25 18:00:02	0.73	5434.42	0.79	0.05	1.42
-34	150.625	20191225	9	2019-12-25 19:00:02	0.68	5536.77	0.77	0.05	1.42
-34	150.625	20191225	10	2019-12-25 20:00:02	0.66	5425.19	0.73	0.05	1.41
-34	150.625	20191225	11	2019-12-25 21:00:02	0.65	5222.35	0.69	0.05	1.41
-34	150.625	20191225	12	2019-12-25 22:00:02	0.68	5052.62	0.65	0.05	1.41
-34	150.625	20191225	13	2019-12-25 23:00:02	0.77	4950.15	0.63	0.05	1.41
-34	150.625	20191225	14	2019-12-26 00:00:02	0.78	4913.09	0.62	0.05	1.41
-34	150.625	20191225	15	2019-12-26 01:00:02	0.83	4898.57	0.62	0.05	1.41
-34	150.625	20191225	16	2019-12-26 02:00:02	0.98	4869.14	0.61	0.05	1.41
-34	150.625	20191225	17	2019-12-26 03:00:02	1.11	4825.09	0.61	0.05	1.41
-34	150.625	20191225	18	2019-12-26 04:00:02	1.23	4786.31	0.61	0.05	1.41
-34	150.625	20191225	19	2019-12-26 05:00:02	1.31	4755.11	0.61	0.05	1.41
-34	150.625	20191225	20	2019-12-26 06:00:02	0.78	4693.29	0.59	0.04	1.41
-34	150.625	20191225	21	2019-12-26 07:00:02	0.57	4619.03	0.56	0.04	1.41
-34	150.625	20191225	22	2019-12-26 08:00:02	0.63	4557.35	0.54	0.04	1.4
-34	150.625	20191225	23	2019-12-26 09:00:02	0.81	4541.27	0.53	0.04	1.4
-34	150.625	20191226	0	2019-12-26 10:00:02	1.43	5774.02	0.65	0.05	1.4
-34	150.625	20191226	1	2019-12-26 11:00:03	2.21	7484.27	0.82	0.07	1.4
-34	150.625	20191226	2	2019-12-26 12:00:03	2.87	9318.87	1.03	0.09	1.41
-34	150.625	20191226	3	2019-12-26 13:00:03	2.22	7688.02	0.85	0.07	1.41
-34	150.625	20191226	4	2019-12-26 14:00:03	2.58	9607.44	1.1	0.09	1.41
-34	150.625	20191226	5	2019-12-26 15:00:03	2.47	10629.1	1.22	0.1	1.41
-34	150.625	20191226	6	2019-12-26 16:00:03	2.08	11136.7	1.21	0.1	1.41
-34	150.625	20191226	7	2019-12-26 17:00:03	1.68	11547.6	1.21	0.11	1.4
-34	150.625	20191226	8	2019-12-26 18:00:03	1.38	11928.2	1.23	0.11	1.4
-34	150.625	20191226	9	2019-12-26 19:00:03	1.32	12300.7	1.28	0.11	1.4
-34	150.625	20191226	10	2019-12-26 20:00:03	1.36	12460.9	1.32	0.12	1.4
-34	150.625	20191226	11	2019-12-26 21:00:03	1.38	12170.2	1.31	0.11	1.4
-34	150.625	20191226	12	2019-12-26 22:00:03	1.44	11578.2	1.27	0.11	1.4
-34	150.625	20191226	13	2019-12-26 23:00:03	1.51	10952.4	1.21	0.1	1.4
-34	150.625	20191226	14	2019-12-27 00:00:03	1.52	10300.4	1.14	0.1	1.4
-34	150.625	20191226	15	2019-12-27 01:00:03	1.54	9656.03	1.06	0.09	1.4
-34	150.625	20191226	16	2019-12-27 02:00:03	1.54	9037.38	0.98	0.08	1.4
-34	150.625	20191226	17	2019-12-27 03:00:03	1.59	8597.89	0.92	0.08	1.4
-34	150.625	20191226	18	2019-12-27 04:00:03	1.68	8206.53	0.86	0.08	1.4
-34	150.625	20191226	19	2019-12-27 05:00:03	1.78	7781.66	0.81	0.07	1.4
-34	150.625	20191226	20	2019-12-27 06:00:03	1.15	7400.04	0.75	0.07	1.4
-34	150.625	20191226	21	2019-12-27 07:00:03	0.7	7062.67	0.7	0.07	1.4
-34	150.625	20191226	22	2019-12-27 08:00:03	0.64	6796.91	0.67	0.06	1.4
-34	150.625	20191226	23	2019-12-27 09:00:03	0.9	6745.71	0.66	0.06	1.4
-34	150.625	20191227	0	2019-12-27 10:00:03	2.26	10115.3	0.98	0.09	1.4
-34	150.625	20191227	1	2019-12-27 11:00:03	3.85	12249.9	1.15	0.11	1.4
-34	150.625	20191227	2	2019-12-27 12:00:03	4.83	14437.1	1.33	0.13	1.4
-34	150.625	20191227	3	2019-12-27 13:00:03	3.36	10209.6	0.94	0.09	1.4
-34	150.625	20191227	4	2019-12-27 14:00:03	3.73	12300	1.12	0.11	1.4
-34	150.625	20191227	5	2019-12-27 15:00:03	2.98	12874.1	1.17	0.12	1.4
-34	150.625	20191227	6	2019-12-27 16:00:03	2.71	11366	1.02	0.11	1.4
-34	150.625	20191227	7	2019-12-27 17:00:03	1.9	10592.2	0.96	0.1	1.4
-34	150.625	20191227	8	2019-12-27 18:00:03	1.35	10239.7	0.95	0.1	1.4
-34	150.625	20191227	9	2019-12-27 19:00:03	1.3	10218.4	0.97	0.1	1.4
-34	150.625	20191227	10	2019-12-27 20:00:03	1.39	10446.7	1	0.1	1.4
-34	150.625	20191227	11	2019-12-27 21:00:03	1.41	10771.9	1.05	0.1	1.4
-34	150.625	20191227	12	2019-12-27 22:00:03	1.6	11092.4	1.08	0.1	1.4
-34	150.625	20191227	13	2019-12-27 23:00:03	1.77	11304.7	1.1	0.11	1.4
-34	150.625	20191227	14	2019-12-28 00:00:03	1.69	11315.5	1.09	0.11	1.4
-34	150.625	20191227	15	2019-12-28 01:00:03	1.6	11173.8	1.06	0.1	1.4
-34	150.625	20191227	16	2019-12-28 02:00:03	1.67	10946.2	1.03	0.1	1.4
-34	150.625	20191227	17	2019-12-28 03:00:03	2.04	10726.5	0.99	0.1	1.4
-34	150.625	20191227	18	2019-12-28 04:00:03	2.52	10618.7	0.98	0.1	1.4
-34	150.625	20191227	19	2019-12-28 05:00:03	2.98	10576.8	0.98	0.1	1.4
-34	150.625	20191227	20	2019-12-28 06:00:03	2.64	10527.1	0.97	0.1	1.4
-34	150.625	20191227	21	2019-12-28 07:00:03	1.98	10428.4	0.95	0.1	1.4
-34	150.625	20191227	22	2019-12-28 08:00:03	1.53	10488.7	0.95	0.1	1.4
-34	150.625	20191227	23	2019-12-28 09:00:03	1.76	11059.2	1	0.1	1.4
-34	150.625	20191228	0	2019-12-28 10:00:03	2.91	9167.14	0.8	0.09	1.4
-34	150.625	20191228	1	2019-12-28 11:00:03	6.55	18079.2	1.53	0.17	1.4
-34	150.625	20191228	2	2019-12-28 12:00:03	9.43	28243.4	2.36	0.26	1.4
-34	150.625	20191228	3	2019-12-28 13:00:03	4.09	13279.1	1.15	0.12	1.4
-34	150.625	20191228	4	2019-12-28 14:00:03	5.87	23310.9	2.14	0.22	1.4
-34	150.625	20191228	5	2019-12-28 15:00:03	5.54	30821.2	2.99	0.29	1.4
-34	150.625	20191228	6	2019-12-28 16:00:03	4.45	37005.4	3.87	0.35	1.41
-34	150.625	20191228	7	2019-12-28 17:00:03	4.09	41655.1	4.68	0.4	1.41
-34	150.625	20191228	8	2019-12-28 18:00:03	4.49	43563.3	5.24	0.42	1.42
-34	150.625	20191228	9	2019-12-28 19:00:03	5.12	44100.1	5.88	0.43	1.43
-34	150.625	20191228	10	2019-12-28 20:00:03	5.56	44219.1	6.16	0.44	1.43
-34	150.625	20191228	11	2019-12-28 21:00:03	5.89	44156.6	6.44	0.44	1.43
-34	150.625	20191228	12	2019-12-28 22:00:03	6.74	44175.9	6.69	0.44	1.44
-34	150.625	20191228	13	2019-12-28 23:00:03	7.91	44664.1	6.61	0.45	1.44
-34	150.625	20191228	14	2019-12-29 00:00:03	8.85	44884.5	6.14	0.45	1.43
-34	150.625	20191228	15	2019-12-29 01:00:03	9.79	44510.2	5.55	0.44	1.42
-34	150.625	20191228	16	2019-12-29 02:00:03	11.06	43603.4	5.09	0.42	1.42
-34	150.625	20191228	17	2019-12-29 03:00:03	12.42	42350.6	4.75	0.41	1.42
-34	150.625	20191228	18	2019-12-29 04:00:03	13.4	40613.6	4.25	0.39	1.41
-34	150.625	20191228	19	2019-12-29 05:00:03	13.9	38538.3	3.81	0.36	1.41
-34	150.625	20191228	20	2019-12-29 06:00:03	13.97	36411.2	3.49	0.34	1.4
-34	150.625	20191228	21	2019-12-29 07:00:03	13.61	34488.1	3.26	0.32	1.4
-34	150.625	20191228	22	2019-12-29 08:00:03	12.87	33116.5	3.14	0.31	1.4
-34	150.625	20191228	23	2019-12-29 09:00:03	13.95	32951.9	3.15	0.31	1.41
-34	150.625	20191229	0	2019-12-29 10:00:03	8.67	33368.5	3.34	0.32	1.41
-34	150.625	20191229	1	2019-12-29 11:00:03	11.07	36349.8	3.94	0.35	1.42
-34	150.625	20191229	2	2019-12-29 12:00:03	12.62	42309.1	4.61	0.41	1.42
-34	150.625	20191229	3	2019-12-29 13:00:03	17.59	51921.7	5.23	0.49	1.41
-34	150.625	20191229	4	2019-12-29 14:00:03	23.04	63559.4	6.7	0.61	1.41
-34	150.625	20191229	5	2019-12-29 15:00:03	23.97	70890.3	8.49	0.69	1.42
-34	150.625	20191229	6	2019-12-29 16:00:03	22.32	72321.2	10.51	0.72	1.43
-34	150.625	20191229	7	2019-12-29 17:00:03	19.78	67247.8	10.72	0.67	1.44
-34	150.625	20191229	8	2019-12-29 18:00:03	18.27	61056.9	9.03	0.61	1.43
-34	150.625	20191229	9	2019-12-29 19:00:03	17.24	54961.6	7.18	0.54	1.43
-34	150.625	20191229	10	2019-12-29 20:00:03	15.13	49581.5	6.06	0.48	1.42
-34	150.625	20191229	11	2019-12-29 21:00:03	12.32	44812.6	5.47	0.43	1.42
-34	150.625	20191229	12	2019-12-29 22:00:03	9.91	40476.4	4.7	0.39	1.42
-34	150.625	20191229	13	2019-12-29 23:00:03	8.41	36691.7	3.89	0.35	1.41
-34	150.625	20191229	14	2019-12-30 00:00:03	7.35	33875.7	3.37	0.32	1.41
-34	150.625	20191229	15	2019-12-30 01:00:03	6.64	31982.8	3.04	0.3	1.4
-34	150.625	20191229	16	2019-12-30 02:00:03	6.09	30791.6	2.85	0.29	1.4
-34	150.625	20191229	17	2019-12-30 03:00:03	5.72	29957.8	2.73	0.28	1.4
-34	150.625	20191229	18	2019-12-30 04:00:03	5.44	29190.7	2.63	0.27	1.4
-34	150.625	20191229	19	2019-12-30 05:00:03	5.22	28313	2.53	0.26	1.4
-34	150.625	20191229	20	2019-12-30 06:00:03	5.19	27314.1	2.43	0.25	1.4
-34	150.625	20191229	21	2019-12-30 07:00:03	4.1	26145.4	2.34	0.24	1.4
-34	150.625	20191229	22	2019-12-30 08:00:03	3.99	24794.6	2.23	0.23	1.4
-34	150.625	20191229	23	2019-12-30 09:00:03	4.14	23460.6	2.13	0.22	1.4
-34	150.625	20191230	0	2019-12-30 10:00:03	4.17	21284	1.89	0.2	1.4
-34	150.625	20191230	1	2019-12-30 11:00:03	5.95	25546.2	2.21	0.24	1.4
-34	150.625	20191230	2	2019-12-30 12:00:03	7.48	30837	2.62	0.29	1.4
-34	150.625	20191230	3	2019-12-30 13:00:03	5.59	25859.9	2.2	0.24	1.4
-34	150.625	20191230	4	2019-12-30 14:00:03	6.34	31625.8	2.74	0.29	1.4
-34	150.625	20191230	5	2019-12-30 15:00:03	6.13	36692	3.22	0.34	1.4
-34	150.625	20191230	6	2019-12-30 16:00:03	5.95	41863.3	3.78	0.39	1.4
-34	150.625	20191230	7	2019-12-30 17:00:03	6.02	46870.8	4.37	0.44	1.41
-34	150.625	20191230	8	2019-12-30 18:00:03	5.78	49671.7	4.72	0.47	1.41
-34	150.625	20191230	9	2019-12-30 19:00:03	5.93	48731.7	4.66	0.46	1.41
-34	150.625	20191230	10	2019-12-30 20:00:03	6.66	43858.7	4.22	0.41	1.41
-34	150.625	20191230	11	2019-12-30 21:00:03	8.49	37599.8	3.62	0.35	1.41
-34	150.625	20191230	12	2019-12-30 22:00:03	11.79	31043.1	2.98	0.29	1.4
-34	150.625	20191230	13	2019-12-30 23:00:03	14.88	25320.9	2.42	0.24	1.4
-34	150.625	20191230	14	2019-12-31 00:00:03	16.28	20828.4	1.96	0.19	1.4
-34	150.625	20191230	15	2019-12-31 01:00:03	15.57	17542.8	1.62	0.16	1.4
-34	150.625	20191230	16	2019-12-31 02:00:03	13.59	14744.5	1.34	0.14	1.4
-34	150.625	20191230	17	2019-12-31 03:00:03	11.11	12564.2	1.14	0.12	1.4
-34	150.625	20191230	18	2019-12-31 04:00:03	8.55	11036.7	1	0.1	1.4
-34	150.625	20191230	19	2019-12-31 05:00:03	6.42	10012.1	0.92	0.09	1.4
-34	150.625	20191230	20	2019-12-31 06:00:03	4.95	9468.62	0.87	0.09	1.4
-34	150.625	20191230	21	2019-12-31 07:00:03	3.74	9005.98	0.82	0.08	1.4
-34	150.625	20191230	22	2019-12-31 08:00:03	1.76	8592.07	0.76	0.08	1.4
-34	150.625	20191230	23	2019-12-31 09:00:03	1.77	8532.68	0.72	0.08	1.4
-34	150.625	20191231	0	2019-12-31 10:00:03	2.97	10999.3	0.89	0.1	1.4
-34	150.625	20191231	1	2019-12-31 11:00:03	5.6	16811.4	1.32	0.16	1.4
-34	150.625	20191231	2	2019-12-31 12:00:03	7.9	25357.2	2.02	0.24	1.4
-34	150.625	20191231	3	2019-12-31 13:00:03	4.19	17169.3	1.63	0.16	1.41
-34	150.625	20191231	4	2019-12-31 14:00:03	6.72	26833.2	2.75	0.26	1.41
-34	150.625	20191231	5	2019-12-31 15:00:03	7.96	31669.4	3.48	0.3	1.42
-34	150.625	20191231	6	2019-12-31 16:00:03	1.65	11382.3	2.11	0.12	1.46
-34	150.625	20191231	7	2019-12-31 17:00:03	2.12	10287.7	1.58	0.1	1.44
-34	150.625	20191231	8	2019-12-31 18:00:03	2.17	8827.64	0.99	0.09	1.42
-34	150.625	20191231	9	2019-12-31 19:00:03	2.31	8280.18	0.88	0.08	1.41
-34	150.625	20191231	10	2019-12-31 20:00:03	3.02	9195.75	1.04	0.09	1.41
-34	150.625	20191231	11	2019-12-31 21:00:03	3.54	10242.1	1.25	0.1	1.41
-34	150.625	20191231	12	2019-12-31 22:00:03	3.31	9653.06	1.38	0.09	1.43
-34	150.625	20191231	13	2019-12-31 23:00:03	2.24	7920.33	1.18	0.08	1.43
-34	150.625	20191231	14	2020-01-01 00:00:03	1.62	6409.35	1.13	0.07	1.44
-34	150.625	20191231	15	2020-01-01 01:00:03	1.31	5388.48	0.92	0.05	1.43
-34	150.625	20191231	16	2020-01-01 02:00:03	1.18	4677.46	0.73	0.05	1.42
-34	150.625	20191231	17	2020-01-01 03:00:03	1.16	4238.31	0.64	0.04	1.42
-34	150.625	20191231	18	2020-01-01 04:00:03	1.2	4061.54	0.59	0.04	1.42
-34	150.625	20191231	19	2020-01-01 05:00:03	1.25	3966.65	0.56	0.04	1.42
-34	150.625	20191231	20	2020-01-01 06:00:03	1.23	3741.37	0.51	0.04	1.42
-34	150.625	20191231	21	2020-01-01 07:00:03	1.25	3495.54	0.47	0.03	1.43
-34	150.625	20191231	22	2020-01-01 08:00:03	1.39	3402.02	0.44	0.03	1.43
-34	150.625	20191231	23	2020-01-01 09:00:03	1.87	4015.76	0.46	0.04	1.42
