# Supplementary material for: Black Carbon Emission, Transport and Effect on Radiation Forcing Modelling During the Summer 2019–2020 Wildfires in Southeast Australia
Source: Preprints.org preprint supplement (doi:10.20944/preprints202302.0293.v1), 2023-02-17
Supplement: Supplementary file 10 [file merra_bc_201912_1350.xlsx]

## Sheet: merra_bc_201912_1350
lat	lon	date	time	date_time	bc	bccmass	totexttau	bcexttau	bcangstr			Date	MERRA-2 Predicted BC	Observed PM₂ι₅						Observed BC	WRF-Chem predicted BC
-30.5	151.875	20191201	0	2019-12-01 10:00:00	0.31	941.38	0.33	0.01	1.56			2019-12-01	0.289286	0						0.250417	0.002584
-30.5	151.875	20191201	1	2019-12-01 11:00:00	0.4	836.87	0.27	0.01	1.53			2019-12-02	0.153333	4.0875				ARMIDALE BC7 1h average [ng/m³]	BC(ng/m3)	0.306174	0.000538333
-30.5	151.875	20191201	2	2019-12-01 12:00:00	0.46	761.16	0.22	0.01	1.51			2019-12-03	0.544167	4.06667				250.417	1.54799	0.25625	0.0269167
-30.5	151.875	20191201	3	2019-12-01 13:00:00	0.47	780.88	0.21	0.01	1.49			2019-12-04	0.987917	9.04583				306.174	0.322497	0.280083	0.00646
-30.5	151.875	20191201	4	2019-12-01 14:00:00	0.47	810.54	0.24	0.01	1.52			2019-12-05	1.59083	30.7625				256.25	16.1249	0.303042	0.0139967
-30.5	151.875	20191201	5	2019-12-01 15:00:00	0.43	755.46	0.2	0.01	1.5			2019-12-06	2.15458	19.3208				280.083	3.86997	0.449792	2.7062
-30.5	151.875	20191201	6	2019-12-01 16:00:00	0.33	675.18	0.18	0.01	1.49			2019-12-07	4.33792	86.3708				303.042	8.38493	1.3165	1.50356
-30.5	151.875	20191201	7	2019-12-01 17:00:00	0.23	619.71	0.17	0.01	1.48			2019-12-08	4.85917	24.8167				449.792	1621.19	13.5702	1.01799
-30.5	151.875	20191201	8	2019-12-01 18:00:00	0.19	568.69	0.13	0.01	1.47			2019-12-09	2.60083	64.8				1316.5	900.735	3.67248	1.21502
-30.5	151.875	20191201	9	2019-12-01 19:00:00	0.18	530.38	0.1	0.01	1.46			2019-12-10	3.51292	98.9625				13570.2	609.843	3.61715	0.793503
-30.5	151.875	20191201	10	2019-12-01 20:00:00	0.16	512.47	0.09	0.01	1.46			2019-12-11	2.28	24.5458				3672.48	727.877	0.822167	1.02822
-30.5	151.875	20191201	11	2019-12-01 21:00:00	0.15	491.96	0.08	0.01	1.46			2019-12-12	1.15958	18.0375				3617.15	475.361	0.877125	0.276703
-30.5	151.875	20191201	12	2019-12-01 22:00:00	0.14	468.08	0.08	0	1.46			2019-12-13	0.27	9.0375				822.167	615.97	0.386583	0.167422
-30.5	151.875	20191201	13	2019-12-01 23:00:00	0.13	454.41	0.08	0	1.46			2019-12-14	0.670417	39.3667				877.125	165.764	0.585125	0.172267
-30.5	151.875	20191201	14	2019-12-02 00:00:00	0.12	452.76	0.09	0	1.45			2019-12-15	1.94583	30.5083				386.583	100.297	0.854625	0.668072
-30.5	151.875	20191201	15	2019-12-02 01:00:00	0.09	454.81	0.09	0	1.45			2019-12-16	3.02625	23.0625				585.125	103.199	1.7913	0.781122
-30.5	151.875	20191201	16	2019-12-02 02:00:00	0.08	443.61	0.08	0	1.45			2019-12-17	2	8.05417				854.625	400.219	2.37571	1.36844
-30.5	151.875	20191201	17	2019-12-02 03:00:00	0.07	421.9	0.07	0	1.43			2019-12-18	2.03208	30.8375				1791.3	467.944	2.996	1.20048
-30.5	151.875	20191201	18	2019-12-02 04:00:00	0.07	418.53	0.07	0	1.42			2019-12-19	10.3896	46.8458				2375.71	819.788	2.78146	1.46696
-30.5	151.875	20191201	19	2019-12-02 05:00:00	0.08	406.34	0.06	0	1.42			2019-12-20	12.525	7.46667				2996	719.169	4.78483	2.6303
-30.5	151.875	20191201	20	2019-12-02 06:00:00	0.06	390.27	0.06	0	1.41			2019-12-21	7.35458	49.6542				2781.46	878.805	2.90142	1.21394
-30.5	151.875	20191201	21	2019-12-02 07:00:00	0.05	375.07	0.05	0	1.41			2019-12-22	5.6425	15.3625				4784.83	1575.72	3.48563	0.603472
-30.5	151.875	20191201	22	2019-12-02 08:00:00	0.04	355.07	0.05	0	1.42			2019-12-23	1.105	14.0708				2901.42	727.232	1.37548	0.404288
-30.5	151.875	20191201	23	2019-12-02 09:00:00	0.04	344.76	0.06	0	1.43			2019-12-24	0.5725	10.1667				3485.62	361.52	0.74975	0.123817
-30.5	151.875	20191202	0	2019-12-02 10:00:00	0.26	723.48	0.12	0.01	1.43			2019-12-25	0.184167	13.1083				1375.48	242.196	0.26725	0.03876
-30.5	151.875	20191202	1	2019-12-02 11:00:00	0.46	1125.15	0.15	0.01	1.43			2019-12-26	0.242083	10.7125				749.75	74.1744	0.421667	0.09044
-30.5	151.875	20191202	2	2019-12-02 12:00:00	0.52	1236.94	0.14	0.01	1.42			2019-12-27	0.07	8.79583				267.25	23.2198	0.132208	0
-30.5	151.875	20191202	3	2019-12-02 13:00:00	0.43	1111.95	0.13	0.01	1.42			2019-12-28	0.19375	16.65				421.667	54.1796	0.123375	0.05491
-30.5	151.875	20191202	4	2019-12-02 14:00:00	0.45	1159.82	0.13	0.01	1.42			2019-12-29	0.520417	44.2708				132.208	0	0.283958	0.289085
-30.5	151.875	20191202	5	2019-12-02 15:00:00	0.26	773.13	0.09	0.01	1.42			2019-12-30	0.769583	61.2667				123.375	32.8947	0.20413	0.258938
-30.5	151.875	20191202	6	2019-12-02 16:00:00	0.13	523.27	0.06	0	1.41			2019-12-31	0.689583	52.4375				283.958	173.181	0.582333	0.43605
-30.5	151.875	20191202	7	2019-12-02 17:00:00	0.09	443.6	0.05	0	1.41			2020-01-01	0.44	17.1545				204.13	155.121
-30.5	151.875	20191202	8	2019-12-02 18:00:00	0.07	391.16	0.04	0	1.41									582.333	261.223
-30.5	151.875	20191202	9	2019-12-02 19:00:00	0.06	368.65	0.04	0	1.41
-30.5	151.875	20191202	10	2019-12-02 20:00:00	0.06	357.59	0.03	0	1.4
-30.5	151.875	20191202	11	2019-12-02 21:00:00	0.05	352.43	0.03	0	1.4
-30.5	151.875	20191202	12	2019-12-02 22:00:00	0.06	356.55	0.03	0	1.4
-30.5	151.875	20191202	13	2019-12-02 23:00:00	0.08	360.84	0.03	0	1.4
-30.5	151.875	20191202	14	2019-12-03 00:00:00	0.08	357	0.03	0	1.4
-30.5	151.875	20191202	15	2019-12-03 01:00:00	0.07	356.08	0.03	0	1.4
-30.5	151.875	20191202	16	2019-12-03 02:00:00	0.08	358.45	0.03	0	1.4
-30.5	151.875	20191202	17	2019-12-03 03:00:00	0.1	356.99	0.03	0	1.4
-30.5	151.875	20191202	18	2019-12-03 04:00:00	0.11	349.93	0.03	0	1.4
-30.5	151.875	20191202	19	2019-12-03 05:00:00	0.12	344.95	0.03	0	1.4
-30.5	151.875	20191202	20	2019-12-03 06:00:00	0.09	343.96	0.03	0	1.4
-30.5	151.875	20191202	21	2019-12-03 07:00:00	0.07	354.51	0.03	0	1.4
-30.5	151.875	20191202	22	2019-12-03 08:00:00	0.1	392.97	0.03	0	1.4
-30.5	151.875	20191202	23	2019-12-03 09:00:00	0.22	553	0.04	0.01	1.4
-30.5	151.875	20191203	0	2019-12-03 10:00:00	0.7	1340.72	0.1	0.01	1.4
-30.5	151.875	20191203	1	2019-12-03 11:00:00	1.42	2690.27	0.18	0.02	1.4
-30.5	151.875	20191203	2	2019-12-03 12:00:00	1.82	3701	0.25	0.03	1.4
-30.5	151.875	20191203	3	2019-12-03 13:00:00	1.35	2874.65	0.21	0.03	1.4
-30.5	151.875	20191203	4	2019-12-03 14:00:00	1.29	2878.12	0.2	0.03	1.4
-30.5	151.875	20191203	5	2019-12-03 15:00:00	0.89	2122.21	0.14	0.02	1.4
-30.5	151.875	20191203	6	2019-12-03 16:00:00	0.57	1408.93	0.1	0.01	1.4
-30.5	151.875	20191203	7	2019-12-03 17:00:00	0.38	987.46	0.08	0.01	1.4
-30.5	151.875	20191203	8	2019-12-03 18:00:00	0.38	802.58	0.07	0.01	1.4
-30.5	151.875	20191203	9	2019-12-03 19:00:00	0.54	774.1	0.07	0.01	1.4
-30.5	151.875	20191203	10	2019-12-03 20:00:00	0.58	756.72	0.06	0.01	1.4
-30.5	151.875	20191203	11	2019-12-03 21:00:00	0.63	722.87	0.06	0.01	1.4
-30.5	151.875	20191203	12	2019-12-03 22:00:00	0.74	705.13	0.06	0.01	1.4
-30.5	151.875	20191203	13	2019-12-03 23:00:00	0.73	703.43	0.05	0.01	1.4
-30.5	151.875	20191203	14	2019-12-04 00:00:00	0.59	715.36	0.05	0.01	1.4
-30.5	151.875	20191203	15	2019-12-04 01:00:00	0.5	732.74	0.05	0.01	1.4
-30.5	151.875	20191203	16	2019-12-04 02:00:00	0.48	717.88	0.05	0.01	1.4
-30.5	151.875	20191203	17	2019-12-04 03:00:00	0.52	678.25	0.05	0.01	1.4
-30.5	151.875	20191203	18	2019-12-04 04:00:00	0.55	628.37	0.04	0.01	1.4
-30.5	151.875	20191203	19	2019-12-04 05:00:00	0.54	584.92	0.04	0.01	1.4
-30.5	151.875	20191203	20	2019-12-04 06:00:00	0.39	560.06	0.04	0.01	1.4
-30.5	151.875	20191203	21	2019-12-04 07:00:00	0.16	552.08	0.04	0.01	1.4
-30.5	151.875	20191203	22	2019-12-04 08:00:00	0.16	592.42	0.04	0.01	1.4
-30.5	151.875	20191203	23	2019-12-04 09:00:00	0.3	822	0.06	0.01	1.4
-30.5	151.875	20191204	0	2019-12-04 10:00:00	1	2097.38	0.14	0.02	1.4
-30.5	151.875	20191204	1	2019-12-04 11:00:00	2.09	4578.33	0.31	0.04	1.4
-30.5	151.875	20191204	2	2019-12-04 12:00:00	2.75	6564.94	0.44	0.06	1.4
-30.5	151.875	20191204	3	2019-12-04 13:00:00	1.36	3447.7	0.24	0.03	1.4
-30.5	151.875	20191204	4	2019-12-04 14:00:00	2.02	5208.37	0.35	0.05	1.4
-30.5	151.875	20191204	5	2019-12-04 15:00:00	1.73	4655.72	0.31	0.04	1.4
-30.5	151.875	20191204	6	2019-12-04 16:00:00	1.33	3595.26	0.25	0.03	1.4
-30.5	151.875	20191204	7	2019-12-04 17:00:00	0.97	2413.47	0.17	0.02	1.4
-30.5	151.875	20191204	8	2019-12-04 18:00:00	0.85	1671.41	0.12	0.02	1.4
-30.5	151.875	20191204	9	2019-12-04 19:00:00	1.09	1306.09	0.1	0.01	1.4
-30.5	151.875	20191204	10	2019-12-04 20:00:00	1.21	1131.33	0.08	0.01	1.4
-30.5	151.875	20191204	11	2019-12-04 21:00:00	1.1	1046.31	0.08	0.01	1.4
-30.5	151.875	20191204	12	2019-12-04 22:00:00	0.99	1031.38	0.08	0.01	1.4
-30.5	151.875	20191204	13	2019-12-04 23:00:00	1.03	1008.77	0.07	0.01	1.4
-30.5	151.875	20191204	14	2019-12-05 00:00:00	0.92	940.78	0.07	0.01	1.4
-30.5	151.875	20191204	15	2019-12-05 01:00:00	0.75	862.21	0.06	0.01	1.4
-30.5	151.875	20191204	16	2019-12-05 02:00:00	0.68	793.59	0.06	0.01	1.4
-30.5	151.875	20191204	17	2019-12-05 03:00:00	0.71	741.31	0.05	0.01	1.4
-30.5	151.875	20191204	18	2019-12-05 04:00:00	0.74	704.25	0.05	0.01	1.4
-30.5	151.875	20191204	19	2019-12-05 05:00:00	0.74	687.66	0.05	0.01	1.4
-30.5	151.875	20191204	20	2019-12-05 06:00:00	0.6	682.25	0.05	0.01	1.4
-30.5	151.875	20191204	21	2019-12-05 07:00:00	0.29	695.35	0.05	0.01	1.4
-30.5	151.875	20191204	22	2019-12-05 08:00:00	0.32	788.41	0.06	0.01	1.4
-30.5	151.875	20191204	23	2019-12-05 09:00:00	0.61	1232.38	0.09	0.01	1.4
-30.5	151.875	20191205	0	2019-12-05 10:00:00	1.48	2904.59	0.21	0.03	1.4
-30.5	151.875	20191205	1	2019-12-05 11:00:00	3.07	6336.98	0.46	0.06	1.4
-30.5	151.875	20191205	2	2019-12-05 12:00:00	4.37	9930.23	0.73	0.09	1.4
-30.5	151.875	20191205	3	2019-12-05 13:00:00	3.12	7972.38	0.58	0.07	1.4
-30.5	151.875	20191205	4	2019-12-05 14:00:00	3.8	10021.5	0.74	0.09	1.4
-30.5	151.875	20191205	5	2019-12-05 15:00:00	3.53	9453.49	0.71	0.09	1.4
-30.5	151.875	20191205	6	2019-12-05 16:00:00	2.87	7475.44	0.55	0.07	1.4
-30.5	151.875	20191205	7	2019-12-05 17:00:00	2.22	5110.26	0.37	0.05	1.4
-30.5	151.875	20191205	8	2019-12-05 18:00:00	1.82	3133.23	0.23	0.03	1.4
-30.5	151.875	20191205	9	2019-12-05 19:00:00	1.62	1942.73	0.15	0.02	1.4
-30.5	151.875	20191205	10	2019-12-05 20:00:00	1.35	1306.07	0.11	0.01	1.41
-30.5	151.875	20191205	11	2019-12-05 21:00:00	0.96	941.84	0.08	0.01	1.41
-30.5	151.875	20191205	12	2019-12-05 22:00:00	0.83	742.31	0.06	0.01	1.4
-30.5	151.875	20191205	13	2019-12-05 23:00:00	0.78	645.77	0.06	0.01	1.4
-30.5	151.875	20191205	14	2019-12-06 00:00:00	0.57	569.72	0.05	0.01	1.4
-30.5	151.875	20191205	15	2019-12-06 01:00:00	0.41	521.72	0.05	0	1.4
-30.5	151.875	20191205	16	2019-12-06 02:00:00	0.34	507.01	0.04	0	1.4
-30.5	151.875	20191205	17	2019-12-06 03:00:00	0.33	515	0.04	0	1.4
-30.5	151.875	20191205	18	2019-12-06 04:00:00	0.34	531.07	0.05	0	1.4
-30.5	151.875	20191205	19	2019-12-06 05:00:00	0.35	544.73	0.05	0.01	1.4
-30.5	151.875	20191205	20	2019-12-06 06:00:00	0.33	540.33	0.06	0.01	1.42
-30.5	151.875	20191205	21	2019-12-06 07:00:00	0.23	547.44	0.06	0.01	1.46
-30.5	151.875	20191205	22	2019-12-06 08:00:00	0.2	651.27	0.07	0.01	1.46
-30.5	151.875	20191205	23	2019-12-06 09:00:00	0.39	1162.42	0.11	0.01	1.44
-30.5	151.875	20191206	0	2019-12-06 10:00:00	1.75	4801.5	0.37	0.04	1.41
-30.5	151.875	20191206	1	2019-12-06 11:00:00	4.17	11965.5	0.89	0.11	1.4
-30.5	151.875	20191206	2	2019-12-06 12:00:00	5.93	18000.2	1.28	0.17	1.4
-30.5	151.875	20191206	3	2019-12-06 13:00:00	3.1	10468.9	0.77	0.1	1.4
-30.5	151.875	20191206	4	2019-12-06 14:00:00	4.56	15471.7	1.11	0.14	1.4
-30.5	151.875	20191206	5	2019-12-06 15:00:00	4.2	14144.8	0.94	0.13	1.4
-30.5	151.875	20191206	6	2019-12-06 16:00:00	3.7	12391.2	0.77	0.12	1.41
-30.5	151.875	20191206	7	2019-12-06 17:00:00	2.88	8924.55	0.54	0.08	1.41
-30.5	151.875	20191206	8	2019-12-06 18:00:00	2.61	6323.62	0.39	0.06	1.41
-30.5	151.875	20191206	9	2019-12-06 19:00:00	2.73	4614.58	0.29	0.04	1.4
-30.5	151.875	20191206	10	2019-12-06 20:00:00	3.13	3288.75	0.21	0.03	1.4
-30.5	151.875	20191206	11	2019-12-06 21:00:00	3.29	2390.66	0.17	0.02	1.4
-30.5	151.875	20191206	12	2019-12-06 22:00:00	3.19	1970.96	0.15	0.02	1.4
-30.5	151.875	20191206	13	2019-12-06 23:00:00	2.98	1951.66	0.15	0.02	1.4
-30.5	151.875	20191206	14	2019-12-07 00:00:00	3.15	2095.62	0.17	0.02	1.4
-30.5	151.875	20191206	15	2019-12-07 01:00:00	3.71	2250.35	0.18	0.02	1.4
-30.5	151.875	20191206	16	2019-12-07 02:00:00	4.52	2371.7	0.19	0.02	1.4
-30.5	151.875	20191206	17	2019-12-07 03:00:00	5.52	2423.72	0.2	0.02	1.4
-30.5	151.875	20191206	18	2019-12-07 04:00:00	6.52	2376.12	0.2	0.02	1.41
-30.5	151.875	20191206	19	2019-12-07 05:00:00	6.98	2288.59	0.19	0.02	1.41
-30.5	151.875	20191206	20	2019-12-07 06:00:00	6.75	2138.96	0.18	0.02	1.4
-30.5	151.875	20191206	21	2019-12-07 07:00:00	3.74	2040.91	0.17	0.02	1.4
-30.5	151.875	20191206	22	2019-12-07 08:00:00	1.5	2276.18	0.18	0.02	1.4
-30.5	151.875	20191206	23	2019-12-07 09:00:00	1.5	3434.22	0.27	0.03	1.4
-30.5	151.875	20191207	0	2019-12-07 10:00:00	1.41	3586.98	0.25	0.03	1.4
-30.5	151.875	20191207	1	2019-12-07 11:00:00	2.85	7298.03	0.5	0.07	1.4
-30.5	151.875	20191207	2	2019-12-07 12:00:00	4.19	11178.3	0.75	0.1	1.4
-30.5	151.875	20191207	3	2019-12-07 13:00:00	4.43	12663.8	0.82	0.12	1.4
-30.5	151.875	20191207	4	2019-12-07 14:00:00	5.32	14997.2	0.97	0.14	1.4
-30.5	151.875	20191207	5	2019-12-07 15:00:00	5.25	15052.4	0.96	0.14	1.4
-30.5	151.875	20191207	6	2019-12-07 16:00:00	4.77	13765.2	0.87	0.13	1.4
-30.5	151.875	20191207	7	2019-12-07 17:00:00	4.28	11868.5	0.76	0.11	1.4
-30.5	151.875	20191207	8	2019-12-07 18:00:00	4.07	9610.52	0.64	0.09	1.4
-30.5	151.875	20191207	9	2019-12-07 19:00:00	3.63	7650.95	0.54	0.07	1.4
-30.5	151.875	20191207	10	2019-12-07 20:00:00	3.76	6196.08	0.45	0.06	1.4
-30.5	151.875	20191207	11	2019-12-07 21:00:00	4.33	5110.72	0.38	0.05	1.4
-30.5	151.875	20191207	12	2019-12-07 22:00:00	5.41	4343.16	0.34	0.04	1.4
-30.5	151.875	20191207	13	2019-12-07 23:00:00	6.52	3847.32	0.3	0.04	1.4
-30.5	151.875	20191207	14	2019-12-08 00:00:00	6.77	3615.6	0.29	0.03	1.4
-30.5	151.875	20191207	15	2019-12-08 01:00:00	6.44	3690.88	0.3	0.03	1.4
-30.5	151.875	20191207	16	2019-12-08 02:00:00	6.22	4011.78	0.34	0.04	1.4
-30.5	151.875	20191207	17	2019-12-08 03:00:00	6.49	4373.85	0.48	0.04	1.42
-30.5	151.875	20191207	18	2019-12-08 04:00:00	6.98	4479.57	0.62	0.04	1.43
-30.5	151.875	20191207	19	2019-12-08 05:00:00	6.93	4217.56	0.59	0.04	1.43
-30.5	151.875	20191207	20	2019-12-08 06:00:00	5	3808.57	0.49	0.04	1.43
-30.5	151.875	20191207	21	2019-12-08 07:00:00	3.03	3477.54	0.37	0.03	1.42
-30.5	151.875	20191207	22	2019-12-08 08:00:00	2.55	3420.46	0.3	0.03	1.41
-30.5	151.875	20191207	23	2019-12-08 09:00:00	2.47	4177.88	0.33	0.04	1.4
-30.5	151.875	20191208	0	2019-12-08 10:00:00	2.99	8062.13	0.62	0.07	1.4
-30.5	151.875	20191208	1	2019-12-08 11:00:00	4.09	11509.2	0.88	0.11	1.4
-30.5	151.875	20191208	2	2019-12-08 12:00:00	4.95	14919.1	1.14	0.14	1.4
-30.5	151.875	20191208	3	2019-12-08 13:00:00	6.18	30541.5	2.11	0.28	1.4
-30.5	151.875	20191208	4	2019-12-08 14:00:00	6.26	24104.5	1.65	0.22	1.4
-30.5	151.875	20191208	5	2019-12-08 15:00:00	5.81	19478	1.33	0.18	1.4
-30.5	151.875	20191208	6	2019-12-08 16:00:00	5.14	16886.1	1.16	0.16	1.4
-30.5	151.875	20191208	7	2019-12-08 17:00:00	4.83	15087.9	1.05	0.14	1.4
-30.5	151.875	20191208	8	2019-12-08 18:00:00	4.68	13594.3	1.01	0.13	1.41
-30.5	151.875	20191208	9	2019-12-08 19:00:00	4.48	12411.1	1.06	0.12	1.42
-30.5	151.875	20191208	10	2019-12-08 20:00:00	4.1	11321.5	0.98	0.11	1.42
-30.5	151.875	20191208	11	2019-12-08 21:00:00	3.62	10156.9	0.87	0.1	1.42
-30.5	151.875	20191208	12	2019-12-08 22:00:00	3.38	9017.22	0.81	0.09	1.42
-30.5	151.875	20191208	13	2019-12-08 23:00:00	3.23	7899.76	0.78	0.08	1.43
-30.5	151.875	20191208	14	2019-12-09 00:00:00	2.56	6842.57	0.66	0.07	1.42
-30.5	151.875	20191208	15	2019-12-09 01:00:00	2.07	5922.16	0.55	0.06	1.42
-30.5	151.875	20191208	16	2019-12-09 02:00:00	1.77	5131.34	0.46	0.05	1.42
-30.5	151.875	20191208	17	2019-12-09 03:00:00	1.64	4502.83	0.41	0.04	1.42
-30.5	151.875	20191208	18	2019-12-09 04:00:00	1.61	4023.26	0.38	0.04	1.42
-30.5	151.875	20191208	19	2019-12-09 05:00:00	1.54	3652.49	0.34	0.03	1.42
-30.5	151.875	20191208	20	2019-12-09 06:00:00	1.35	3364.15	0.29	0.03	1.41
-30.5	151.875	20191208	21	2019-12-09 07:00:00	1.24	3145.8	0.25	0.03	1.4
-30.5	151.875	20191208	22	2019-12-09 08:00:00	1.29	3053.66	0.24	0.03	1.4
-30.5	151.875	20191208	23	2019-12-09 09:00:00	1.42	3296.04	0.27	0.03	1.4
-30.5	151.875	20191209	0	2019-12-09 10:00:00	1.97	7293.75	0.57	0.07	1.4
-30.5	151.875	20191209	1	2019-12-09 11:00:00	3.3	9943.55	0.8	0.09	1.4
-30.5	151.875	20191209	2	2019-12-09 12:00:00	4.17	12575.7	1.04	0.12	1.4
-30.5	151.875	20191209	3	2019-12-09 13:00:00	3.48	11841.1	0.98	0.11	1.4
-30.5	151.875	20191209	4	2019-12-09 14:00:00	3.87	13222.7	1.15	0.12	1.41
-30.5	151.875	20191209	5	2019-12-09 15:00:00	3.71	12867.9	1.22	0.12	1.41
-30.5	151.875	20191209	6	2019-12-09 16:00:00	3.39	11625.2	1.2	0.11	1.41
-30.5	151.875	20191209	7	2019-12-09 17:00:00	3.08	10178.7	1.03	0.1	1.41
-30.5	151.875	20191209	8	2019-12-09 18:00:00	2.82	8823.58	0.83	0.08	1.41
-30.5	151.875	20191209	9	2019-12-09 19:00:01	2.88	7757.59	0.71	0.07	1.41
-30.5	151.875	20191209	10	2019-12-09 20:00:01	3.03	6975.31	0.66	0.07	1.42
-30.5	151.875	20191209	11	2019-12-09 21:00:01	3.23	6396.27	0.61	0.06	1.42
-30.5	151.875	20191209	12	2019-12-09 22:00:01	3.46	5961.59	0.53	0.06	1.41
-30.5	151.875	20191209	13	2019-12-09 23:00:01	3.54	5557.39	0.48	0.05	1.41
-30.5	151.875	20191209	14	2019-12-10 00:00:01	3.34	5117.38	0.43	0.05	1.41
-30.5	151.875	20191209	15	2019-12-10 01:00:01	3.08	4644.37	0.38	0.04	1.4
-30.5	151.875	20191209	16	2019-12-10 02:00:01	2.75	4163.92	0.33	0.04	1.4
-30.5	151.875	20191209	17	2019-12-10 03:00:01	2.45	3770.33	0.3	0.04	1.4
-30.5	151.875	20191209	18	2019-12-10 04:00:01	2.31	3547.79	0.28	0.03	1.4
-30.5	151.875	20191209	19	2019-12-10 05:00:01	2.24	3464.82	0.28	0.03	1.4
-30.5	151.875	20191209	20	2019-12-10 06:00:01	1.97	3396.39	0.28	0.03	1.4
-30.5	151.875	20191209	21	2019-12-10 07:00:01	1.54	3323.33	0.27	0.03	1.4
-30.5	151.875	20191209	22	2019-12-10 08:00:01	1.27	3291.67	0.26	0.03	1.4
-30.5	151.875	20191209	23	2019-12-10 09:00:01	1.26	3518.42	0.28	0.03	1.4
-30.5	151.875	20191210	0	2019-12-10 10:00:01	2.44	6202	0.51	0.06	1.4
-30.5	151.875	20191210	1	2019-12-10 11:00:01	4.72	12075.8	1.03	0.11	1.4
-30.5	151.875	20191210	2	2019-12-10 12:00:01	6.57	17913.3	1.54	0.17	1.4
-30.5	151.875	20191210	3	2019-12-10 13:00:01	4.91	21254	1.99	0.2	1.4
-30.5	151.875	20191210	4	2019-12-10 14:00:01	6.95	25502.4	2.43	0.24	1.41
-30.5	151.875	20191210	5	2019-12-10 15:00:01	6.67	25149	2.6	0.24	1.41
-30.5	151.875	20191210	6	2019-12-10 16:00:01	5.8	21699.9	2.46	0.21	1.42
-30.5	151.875	20191210	7	2019-12-10 17:00:01	5.18	17235.7	1.95	0.17	1.42
-30.5	151.875	20191210	8	2019-12-10 18:00:01	4.5	13020.9	1.43	0.13	1.42
-30.5	151.875	20191210	9	2019-12-10 19:00:01	3.74	9633.32	1.01	0.09	1.42
-30.5	151.875	20191210	10	2019-12-10 20:00:01	3.15	7063.07	0.67	0.07	1.41
-30.5	151.875	20191210	11	2019-12-10 21:00:01	2.77	5305.66	0.46	0.05	1.41
-30.5	151.875	20191210	12	2019-12-10 22:00:01	2.48	4399.1	0.36	0.04	1.4
-30.5	151.875	20191210	13	2019-12-10 23:00:01	2.22	4110.13	0.34	0.04	1.4
-30.5	151.875	20191210	14	2019-12-11 00:00:01	1.96	4119.27	0.38	0.04	1.41
-30.5	151.875	20191210	15	2019-12-11 01:00:01	1.84	4197.26	0.45	0.04	1.43
-30.5	151.875	20191210	16	2019-12-11 02:00:01	1.91	4151.11	0.5	0.04	1.44
-30.5	151.875	20191210	17	2019-12-11 03:00:01	2.05	4043.9	0.53	0.04	1.44
-30.5	151.875	20191210	18	2019-12-11 04:00:01	2.08	3908.25	0.53	0.04	1.44
-30.5	151.875	20191210	19	2019-12-11 05:00:01	1.93	3740.17	0.48	0.04	1.43
-30.5	151.875	20191210	20	2019-12-11 06:00:01	1.63	3544	0.42	0.03	1.42
-30.5	151.875	20191210	21	2019-12-11 07:00:01	1.31	3415.69	0.36	0.03	1.41
-30.5	151.875	20191210	22	2019-12-11 08:00:01	1.25	3479.22	0.35	0.03	1.4
-30.5	151.875	20191210	23	2019-12-11 09:00:01	1.59	4254.92	0.41	0.04	1.4
-30.5	151.875	20191211	0	2019-12-11 10:00:01	1.81	4682.36	0.45	0.04	1.41
-30.5	151.875	20191211	1	2019-12-11 11:00:01	3.16	8623.69	0.82	0.08	1.41
-30.5	151.875	20191211	2	2019-12-11 12:00:01	4.07	12715.6	1.53	0.12	1.43
-30.5	151.875	20191211	3	2019-12-11 13:00:01	2.77	10110.7	1.63	0.1	1.46
-30.5	151.875	20191211	4	2019-12-11 14:00:01	4.15	13333.8	1.88	0.13	1.44
-30.5	151.875	20191211	5	2019-12-11 15:00:01	4.04	12891.7	1.57	0.13	1.43
-30.5	151.875	20191211	6	2019-12-11 16:00:01	3.12	10638.1	1.3	0.1	1.43
-30.5	151.875	20191211	7	2019-12-11 17:00:01	2.42	8574.25	1.43	0.09	1.47
-30.5	151.875	20191211	8	2019-12-11 18:00:01	2.18	6784.61	1.44	0.08	1.5
-30.5	151.875	20191211	9	2019-12-11 19:00:01	2.24	5592.96	1.19	0.06	1.5
-30.5	151.875	20191211	10	2019-12-11 20:00:01	1.99	4832.81	0.97	0.05	1.49
-30.5	151.875	20191211	11	2019-12-11 21:00:01	1.65	4294.46	0.77	0.05	1.47
-30.5	151.875	20191211	12	2019-12-11 22:00:01	1.6	3942.68	0.65	0.04	1.45
-30.5	151.875	20191211	13	2019-12-11 23:00:01	1.97	3722.38	0.61	0.04	1.44
-30.5	151.875	20191211	14	2019-12-12 00:00:01	1.83	3577.21	0.55	0.04	1.44
-30.5	151.875	20191211	15	2019-12-12 01:00:01	1.72	3504.21	0.51	0.04	1.43
-30.5	151.875	20191211	16	2019-12-12 02:00:01	1.75	3347.2	0.47	0.03	1.43
-30.5	151.875	20191211	17	2019-12-12 03:00:01	1.85	3080.99	0.42	0.03	1.43
-30.5	151.875	20191211	18	2019-12-12 04:00:01	1.87	2826.9	0.38	0.03	1.42
-30.5	151.875	20191211	19	2019-12-12 05:00:01	1.79	2659.29	0.36	0.03	1.42
-30.5	151.875	20191211	20	2019-12-12 06:00:01	1.34	2498.04	0.32	0.02	1.42
-30.5	151.875	20191211	21	2019-12-12 07:00:01	1.04	2314.73	0.29	0.02	1.42
-30.5	151.875	20191211	22	2019-12-12 08:00:01	1.01	2201.01	0.27	0.02	1.42
-30.5	151.875	20191211	23	2019-12-12 09:00:01	1.33	2671.35	0.31	0.03	1.42
-30.5	151.875	20191212	0	2019-12-12 10:00:01	1.25	2870.4	0.34	0.03	1.42
-30.5	151.875	20191212	1	2019-12-12 11:00:01	1.21	3324.52	0.41	0.03	1.43
-30.5	151.875	20191212	2	2019-12-12 12:00:01	1.2	3750.53	0.49	0.04	1.44
-30.5	151.875	20191212	3	2019-12-12 13:00:01	1.04	3610.53	0.53	0.04	1.44
-30.5	151.875	20191212	4	2019-12-12 14:00:01	1.14	4171.63	0.58	0.04	1.44
-30.5	151.875	20191212	5	2019-12-12 15:00:01	1.12	4285.1	0.6	0.04	1.45
-30.5	151.875	20191212	6	2019-12-12 16:00:01	1.04	4118.93	0.59	0.04	1.45
-30.5	151.875	20191212	7	2019-12-12 17:00:01	0.95	3794.84	0.55	0.04	1.44
-30.5	151.875	20191212	8	2019-12-12 18:00:01	0.88	3387.97	0.47	0.03	1.43
-30.5	151.875	20191212	9	2019-12-12 19:00:01	0.75	2997.44	0.4	0.03	1.42
-30.5	151.875	20191212	10	2019-12-12 20:00:01	0.56	2641.12	0.34	0.03	1.42
-30.5	151.875	20191212	11	2019-12-12 21:00:01	0.43	2344.84	0.3	0.02	1.42
-30.5	151.875	20191212	12	2019-12-12 22:00:01	0.41	2112.4	0.28	0.02	1.43
-30.5	151.875	20191212	13	2019-12-12 23:00:01	0.32	1913.34	0.26	0.02	1.43
-30.5	151.875	20191212	14	2019-12-13 00:00:01	0.24	1736.21	0.24	0.02	1.43
-30.5	151.875	20191212	15	2019-12-13 01:00:01	0.2	1600.95	0.22	0.02	1.43
-30.5	151.875	20191212	16	2019-12-13 02:00:01	0.19	1504.69	0.2	0.01	1.43
-30.5	151.875	20191212	17	2019-12-13 03:00:01	0.19	1419.97	0.19	0.01	1.43
-30.5	151.875	20191212	18	2019-12-13 04:00:01	0.17	1339.24	0.19	0.01	1.43
-30.5	151.875	20191212	19	2019-12-13 05:00:01	0.17	1256.13	0.18	0.01	1.44
-30.5	151.875	20191212	20	2019-12-13 06:00:01	0.16	1172.75	0.17	0.01	1.44
-30.5	151.875	20191212	21	2019-12-13 07:00:01	0.16	1095.12	0.16	0.01	1.45
-30.5	151.875	20191212	22	2019-12-13 08:00:01	0.19	1009.3	0.15	0.01	1.45
-30.5	151.875	20191212	23	2019-12-13 09:00:01	0.26	954.86	0.13	0.01	1.44
-30.5	151.875	20191213	0	2019-12-13 10:00:01	0.3	1301.44	0.19	0.01	1.44
-30.5	151.875	20191213	1	2019-12-13 11:00:01	0.31	1203.33	0.18	0.01	1.44
-30.5	151.875	20191213	2	2019-12-13 12:00:01	0.32	1178.64	0.18	0.01	1.45
-30.5	151.875	20191213	3	2019-12-13 13:00:01	0.35	1274.92	0.21	0.01	1.45
-30.5	151.875	20191213	4	2019-12-13 14:00:01	0.38	1429.27	0.24	0.01	1.46
-30.5	151.875	20191213	5	2019-12-13 15:00:01	0.42	1554.72	0.28	0.02	1.47
-30.5	151.875	20191213	6	2019-12-13 16:00:01	0.44	1629.09	0.29	0.02	1.46
-30.5	151.875	20191213	7	2019-12-13 17:00:01	0.45	1651.75	0.3	0.02	1.46
-30.5	151.875	20191213	8	2019-12-13 18:00:01	0.45	1609.62	0.28	0.02	1.45
-30.5	151.875	20191213	9	2019-12-13 19:00:01	0.39	1487.93	0.23	0.01	1.44
-30.5	151.875	20191213	10	2019-12-13 20:00:01	0.29	1329.57	0.19	0.01	1.42
-30.5	151.875	20191213	11	2019-12-13 21:00:01	0.21	1197.48	0.17	0.01	1.42
-30.5	151.875	20191213	12	2019-12-13 22:00:01	0.14	1113.87	0.16	0.01	1.42
-30.5	151.875	20191213	13	2019-12-13 23:00:01	0.1	1061.47	0.15	0.01	1.43
-30.5	151.875	20191213	14	2019-12-14 00:00:01	0.08	1016.22	0.15	0.01	1.43
-30.5	151.875	20191213	15	2019-12-14 01:00:01	0.07	964.68	0.14	0.01	1.43
-30.5	151.875	20191213	16	2019-12-14 02:00:01	0.07	929.12	0.13	0.01	1.43
-30.5	151.875	20191213	17	2019-12-14 03:00:01	0.07	918.2	0.13	0.01	1.43
-30.5	151.875	20191213	18	2019-12-14 04:00:01	0.09	909.98	0.13	0.01	1.43
-30.5	151.875	20191213	19	2019-12-14 05:00:01	0.11	896.05	0.12	0.01	1.43
-30.5	151.875	20191213	20	2019-12-14 06:00:01	0.15	881.56	0.12	0.01	1.43
-30.5	151.875	20191213	21	2019-12-14 07:00:01	0.23	860.78	0.12	0.01	1.43
-30.5	151.875	20191213	22	2019-12-14 08:00:01	0.27	831.25	0.11	0.01	1.43
-30.5	151.875	20191213	23	2019-12-14 09:00:01	0.26	801.46	0.1	0.01	1.42
-30.5	151.875	20191214	0	2019-12-14 10:00:01	0.27	895.15	0.12	0.01	1.43
-30.5	151.875	20191214	1	2019-12-14 11:00:01	0.38	1157.98	0.15	0.01	1.44
-30.5	151.875	20191214	2	2019-12-14 12:00:01	0.61	1768.73	0.22	0.02	1.45
-30.5	151.875	20191214	3	2019-12-14 13:00:01	1.29	3600.2	0.44	0.04	1.45
-30.5	151.875	20191214	4	2019-12-14 14:00:01	1.54	4264.05	0.49	0.04	1.43
-30.5	151.875	20191214	5	2019-12-14 15:00:01	1.6	4513.38	0.51	0.04	1.43
-30.5	151.875	20191214	6	2019-12-14 16:00:01	1.52	4408.86	0.5	0.04	1.42
-30.5	151.875	20191214	7	2019-12-14 17:00:01	1.4	4134.16	0.46	0.04	1.42
-30.5	151.875	20191214	8	2019-12-14 18:00:01	1.27	3799.75	0.41	0.04	1.41
-30.5	151.875	20191214	9	2019-12-14 19:00:01	1.15	3404.89	0.37	0.03	1.41
-30.5	151.875	20191214	10	2019-12-14 20:00:01	1.03	3007.99	0.33	0.03	1.42
-30.5	151.875	20191214	11	2019-12-14 21:00:01	0.93	2664.31	0.31	0.03	1.42
-30.5	151.875	20191214	12	2019-12-14 22:00:01	0.87	2401.38	0.3	0.02	1.43
-30.5	151.875	20191214	13	2019-12-14 23:00:01	0.83	2227.95	0.29	0.02	1.43
-30.5	151.875	20191214	14	2019-12-15 00:00:01	0.8	2131.72	0.27	0.02	1.43
-30.5	151.875	20191214	15	2019-12-15 01:00:01	0.75	2056.77	0.24	0.02	1.41
-30.5	151.875	20191214	16	2019-12-15 02:00:01	0.69	1942.52	0.22	0.02	1.41
-30.5	151.875	20191214	17	2019-12-15 03:00:01	0.61	1841.2	0.21	0.02	1.41
-30.5	151.875	20191214	18	2019-12-15 04:00:01	0.53	1794.71	0.21	0.02	1.42
-30.5	151.875	20191214	19	2019-12-15 05:00:01	0.46	1761.21	0.21	0.02	1.42
-30.5	151.875	20191214	20	2019-12-15 06:00:01	0.47	1711.25	0.2	0.02	1.43
-30.5	151.875	20191214	21	2019-12-15 07:00:01	0.77	1689.4	0.18	0.02	1.42
-30.5	151.875	20191214	22	2019-12-15 08:00:01	0.9	1748.73	0.17	0.02	1.41
-30.5	151.875	20191214	23	2019-12-15 09:00:01	0.87	1846.94	0.17	0.02	1.4
-30.5	151.875	20191215	0	2019-12-15 10:00:01	1.13	2613.77	0.21	0.02	1.4
-30.5	151.875	20191215	1	2019-12-15 11:00:01	1.87	4677.89	0.34	0.04	1.4
-30.5	151.875	20191215	2	2019-12-15 12:00:01	2.71	7356.96	0.52	0.07	1.4
-30.5	151.875	20191215	3	2019-12-15 13:00:01	3.96	11285.7	0.8	0.11	1.4
-30.5	151.875	20191215	4	2019-12-15 14:00:01	4.76	14090.9	1.03	0.13	1.4
-30.5	151.875	20191215	5	2019-12-15 15:00:01	4.93	14940.1	1.15	0.14	1.4
-30.5	151.875	20191215	6	2019-12-15 16:00:01	4.42	13483.1	1.11	0.13	1.4
-30.5	151.875	20191215	7	2019-12-15 17:00:01	3.6	10499.7	0.91	0.1	1.41
-30.5	151.875	20191215	8	2019-12-15 18:00:01	2.97	7106.66	0.65	0.07	1.41
-30.5	151.875	20191215	9	2019-12-15 19:00:01	2.51	4658.02	0.45	0.04	1.41
-30.5	151.875	20191215	10	2019-12-15 20:00:01	2.18	3163.6	0.32	0.03	1.41
-30.5	151.875	20191215	11	2019-12-15 21:00:01	1.89	2251.02	0.23	0.02	1.42
-30.5	151.875	20191215	12	2019-12-15 22:00:01	1.61	1643.28	0.16	0.02	1.42
-30.5	151.875	20191215	13	2019-12-15 23:00:01	1.31	1167.92	0.11	0.01	1.43
-30.5	151.875	20191215	14	2019-12-16 00:00:01	0.96	778.07	0.07	0.01	1.43
-30.5	151.875	20191215	15	2019-12-16 01:00:01	0.71	530.91	0.05	0.01	1.43
-30.5	151.875	20191215	16	2019-12-16 02:00:01	0.58	424.66	0.05	0	1.45
-30.5	151.875	20191215	17	2019-12-16 03:00:01	0.56	403.22	0.05	0	1.46
-30.5	151.875	20191215	18	2019-12-16 04:00:01	0.57	392.47	0.05	0	1.46
-30.5	151.875	20191215	19	2019-12-16 05:00:01	0.61	375.05	0.05	0	1.46
-30.5	151.875	20191215	20	2019-12-16 06:00:01	0.56	382.82	0.05	0	1.46
-30.5	151.875	20191215	21	2019-12-16 07:00:01	0.3	438.51	0.05	0	1.45
-30.5	151.875	20191215	22	2019-12-16 08:00:01	0.27	539.28	0.06	0.01	1.44
-30.5	151.875	20191215	23	2019-12-16 09:00:01	0.46	914.27	0.08	0.01	1.42
-30.5	151.875	20191216	0	2019-12-16 10:00:01	1.48	2940.19	0.22	0.03	1.41
-30.5	151.875	20191216	1	2019-12-16 11:00:01	3.1	6499.13	0.47	0.06	1.4
-30.5	151.875	20191216	2	2019-12-16 12:00:01	4.89	10993.9	0.8	0.1	1.4
-30.5	151.875	20191216	3	2019-12-16 13:00:01	3.77	9794.51	0.73	0.09	1.4
-30.5	151.875	20191216	4	2019-12-16 14:00:01	5.9	15461.1	1.16	0.14	1.4
-30.5	151.875	20191216	5	2019-12-16 15:00:01	7.29	18993	1.46	0.18	1.4
-30.5	151.875	20191216	6	2019-12-16 16:00:01	8.11	20960.2	1.66	0.19	1.4
-30.5	151.875	20191216	7	2019-12-16 17:00:01	8.1	21166.6	1.74	0.2	1.4
-30.5	151.875	20191216	8	2019-12-16 18:00:01	6.86	19966.2	1.74	0.19	1.41
-30.5	151.875	20191216	9	2019-12-16 19:00:01	5.06	18417.8	1.73	0.17	1.41
-30.5	151.875	20191216	10	2019-12-16 20:00:01	4.04	17763.1	1.74	0.17	1.41
-30.5	151.875	20191216	11	2019-12-16 21:00:01	3.3	17718.5	1.78	0.17	1.41
-30.5	151.875	20191216	12	2019-12-16 22:00:01	2.83	17710.2	1.78	0.17	1.41
-30.5	151.875	20191216	13	2019-12-16 23:00:01	2.32	17321.6	1.68	0.16	1.41
-30.5	151.875	20191216	14	2019-12-17 00:00:01	1.68	16345.4	1.55	0.15	1.41
-30.5	151.875	20191216	15	2019-12-17 01:00:01	1.2	14620.7	1.36	0.14	1.4
-30.5	151.875	20191216	16	2019-12-17 02:00:01	0.92	12653.7	1.18	0.12	1.4
-30.5	151.875	20191216	17	2019-12-17 03:00:01	0.79	10884.5	1.02	0.1	1.4
-30.5	151.875	20191216	18	2019-12-17 04:00:01	0.71	9465.61	0.89	0.09	1.41
-30.5	151.875	20191216	19	2019-12-17 05:00:01	0.7	8374.76	0.79	0.08	1.41
-30.5	151.875	20191216	20	2019-12-17 06:00:01	0.83	7512.27	0.7	0.07	1.4
-30.5	151.875	20191216	21	2019-12-17 07:00:01	1.05	6951.75	0.64	0.06	1.4
-30.5	151.875	20191216	22	2019-12-17 08:00:01	1.3	6659.28	0.61	0.06	1.4
-30.5	151.875	20191216	23	2019-12-17 09:00:01	2.14	6698.58	0.62	0.06	1.4
-30.5	151.875	20191217	0	2019-12-17 10:00:01	2.65	5482.5	0.5	0.05	1.4
-30.5	151.875	20191217	1	2019-12-17 11:00:01	3.46	6555.28	0.59	0.06	1.4
-30.5	151.875	20191217	2	2019-12-17 12:00:01	3.96	8318.62	0.72	0.08	1.4
-30.5	151.875	20191217	3	2019-12-17 13:00:01	4.56	10356.2	0.88	0.1	1.4
-30.5	151.875	20191217	4	2019-12-17 14:00:01	4.75	11563.5	0.97	0.11	1.4
-30.5	151.875	20191217	5	2019-12-17 15:00:01	4.49	11660.7	0.99	0.11	1.4
-30.5	151.875	20191217	6	2019-12-17 16:00:01	3.85	10822.8	0.93	0.1	1.4
-30.5	151.875	20191217	7	2019-12-17 17:00:01	2.69	9273.49	0.81	0.09	1.4
-30.5	151.875	20191217	8	2019-12-17 18:00:01	1.68	7854.54	0.68	0.07	1.4
-30.5	151.875	20191217	9	2019-12-17 19:00:01	1.22	7327.68	0.62	0.07	1.4
-30.5	151.875	20191217	10	2019-12-17 20:00:01	0.89	6955.13	0.58	0.06	1.4
-30.5	151.875	20191217	11	2019-12-17 21:00:01	0.82	5964.45	0.49	0.06	1.4
-30.5	151.875	20191217	12	2019-12-17 22:00:01	0.83	4569.68	0.38	0.04	1.41
-30.5	151.875	20191217	13	2019-12-17 23:00:01	0.83	3589.29	0.29	0.03	1.41
-30.5	151.875	20191217	14	2019-12-18 00:00:01	0.72	3004.51	0.24	0.03	1.41
-30.5	151.875	20191217	15	2019-12-18 01:00:01	0.65	2570.58	0.21	0.02	1.41
-30.5	151.875	20191217	16	2019-12-18 02:00:01	0.59	2248.89	0.18	0.02	1.41
-30.5	151.875	20191217	17	2019-12-18 03:00:02	0.62	2056.09	0.16	0.02	1.41
-30.5	151.875	20191217	18	2019-12-18 04:00:02	0.7	1965.32	0.15	0.02	1.42
-30.5	151.875	20191217	19	2019-12-18 05:00:02	0.77	1950.94	0.14	0.02	1.41
-30.5	151.875	20191217	20	2019-12-18 06:00:02	0.76	1987.54	0.13	0.02	1.41
-30.5	151.875	20191217	21	2019-12-18 07:00:02	0.73	2052.66	0.13	0.02	1.41
-30.5	151.875	20191217	22	2019-12-18 08:00:02	0.69	2142.41	0.13	0.02	1.41
-30.5	151.875	20191217	23	2019-12-18 09:00:02	0.77	2370.63	0.15	0.02	1.41
-30.5	151.875	20191218	0	2019-12-18 10:00:02	1.41	3329.09	0.22	0.03	1.41
-30.5	151.875	20191218	1	2019-12-18 11:00:02	2.44	5133.4	0.36	0.05	1.4
-30.5	151.875	20191218	2	2019-12-18 12:00:02	3.37	7115.15	0.52	0.07	1.4
-30.5	151.875	20191218	3	2019-12-18 13:00:02	1.77	4385.81	0.33	0.04	1.4
-30.5	151.875	20191218	4	2019-12-18 14:00:02	2.68	6443.68	0.49	0.06	1.4
-30.5	151.875	20191218	5	2019-12-18 15:00:02	3.06	7571.86	0.59	0.07	1.4
-30.5	151.875	20191218	6	2019-12-18 16:00:02	3.17	8088.05	0.63	0.08	1.4
-30.5	151.875	20191218	7	2019-12-18 17:00:02	3.19	8263.24	0.64	0.08	1.4
-30.5	151.875	20191218	8	2019-12-18 18:00:02	3.05	8173.97	0.63	0.08	1.4
-30.5	151.875	20191218	9	2019-12-18 19:00:02	3.27	8155.44	0.61	0.08	1.4
-30.5	151.875	20191218	10	2019-12-18 20:00:02	3.57	8535.59	0.63	0.08	1.4
-30.5	151.875	20191218	11	2019-12-18 21:00:02	3.6	9221.3	0.67	0.09	1.4
-30.5	151.875	20191218	12	2019-12-18 22:00:02	3.6	10279.6	0.75	0.1	1.4
-30.5	151.875	20191218	13	2019-12-18 23:00:02	3.59	11445.9	0.85	0.11	1.4
-30.5	151.875	20191218	14	2019-12-19 00:00:02	3.54	12214	0.9	0.11	1.4
-30.5	151.875	20191218	15	2019-12-19 01:00:02	3.63	12366.9	0.9	0.11	1.4
-30.5	151.875	20191218	16	2019-12-19 02:00:02	3.82	12104.3	0.87	0.11	1.4
-30.5	151.875	20191218	17	2019-12-19 03:00:02	4.08	11766.1	0.85	0.11	1.4
-30.5	151.875	20191218	18	2019-12-19 04:00:02	4.33	11568	0.83	0.11	1.4
-30.5	151.875	20191218	19	2019-12-19 05:00:02	4.49	11460.9	0.82	0.11	1.4
-30.5	151.875	20191218	20	2019-12-19 06:00:02	4.36	11325.5	0.8	0.11	1.4
-30.5	151.875	20191218	21	2019-12-19 07:00:02	3.76	11060.1	0.78	0.1	1.4
-30.5	151.875	20191218	22	2019-12-19 08:00:02	4.14	10815	0.77	0.1	1.4
-30.5	151.875	20191218	23	2019-12-19 09:00:02	4.72	10835.1	0.77	0.1	1.4
-30.5	151.875	20191219	0	2019-12-19 10:00:02	3.56	13440.7	1.11	0.12	1.4
-30.5	151.875	20191219	1	2019-12-19 11:00:02	4.53	14677.5	1.19	0.14	1.4
-30.5	151.875	20191219	2	2019-12-19 12:00:02	5.21	16570.3	1.34	0.15	1.4
-30.5	151.875	20191219	3	2019-12-19 13:00:02	5.47	19257.9	1.6	0.18	1.4
-30.5	151.875	20191219	4	2019-12-19 14:00:02	7.23	24436.1	2.03	0.23	1.4
-30.5	151.875	20191219	5	2019-12-19 15:00:02	9.08	31186.3	2.62	0.29	1.4
-30.5	151.875	20191219	6	2019-12-19 16:00:02	11.63	39709.8	3.39	0.37	1.4
-30.5	151.875	20191219	7	2019-12-19 17:00:02	15.03	48307.8	4.19	0.45	1.4
-30.5	151.875	20191219	8	2019-12-19 18:00:02	19.06	54730.2	4.78	0.51	1.4
-30.5	151.875	20191219	9	2019-12-19 19:00:02	22.88	57501.9	5.02	0.53	1.4
-30.5	151.875	20191219	10	2019-12-19 20:00:02	25.27	56399.4	4.92	0.52	1.4
-30.5	151.875	20191219	11	2019-12-19 21:00:02	26.05	52361.5	4.56	0.49	1.4
-30.5	151.875	20191219	12	2019-12-19 22:00:02	26.3	46595.2	4.04	0.43	1.4
-30.5	151.875	20191219	13	2019-12-19 23:00:02	27.18	41008.1	3.54	0.38	1.4
-30.5	151.875	20191219	14	2019-12-20 00:00:02	29.13	37090.1	3.21	0.34	1.4
-30.5	151.875	20191219	15	2019-12-20 01:00:02	30.78	34617.5	3.03	0.32	1.4
-30.5	151.875	20191219	16	2019-12-20 02:00:02	31.15	33172.8	2.96	0.31	1.4
-30.5	151.875	20191219	17	2019-12-20 03:00:02	29.91	32398.7	2.95	0.3	1.4
-30.5	151.875	20191219	18	2019-12-20 04:00:02	28.05	31624.5	2.92	0.29	1.4
-30.5	151.875	20191219	19	2019-12-20 05:00:02	25.6	30455.4	2.82	0.28	1.4
-30.5	151.875	20191219	20	2019-12-20 06:00:02	22.5	28757.3	2.66	0.27	1.4
-30.5	151.875	20191219	21	2019-12-20 07:00:02	17.48	26701.4	2.46	0.25	1.4
-30.5	151.875	20191219	22	2019-12-20 08:00:02	11.04	25144.8	2.33	0.23	1.4
-30.5	151.875	20191219	23	2019-12-20 09:00:02	9.29	24803.2	2.33	0.23	1.4
-30.5	151.875	20191220	0	2019-12-20 10:00:02	4.34	14602.2	1.42	0.14	1.4
-30.5	151.875	20191220	1	2019-12-20 11:00:02	4.79	15455.6	1.53	0.15	1.41
-30.5	151.875	20191220	2	2019-12-20 12:00:02	5.19	16246.3	1.6	0.15	1.41
-30.5	151.875	20191220	3	2019-12-20 13:00:02	5.59	17152.2	1.66	0.16	1.4
-30.5	151.875	20191220	4	2019-12-20 14:00:02	5.96	17682.3	1.71	0.17	1.4
-30.5	151.875	20191220	5	2019-12-20 15:00:02	6.13	18099.6	1.77	0.17	1.41
-30.5	151.875	20191220	6	2019-12-20 16:00:02	6.25	18589.2	1.83	0.17	1.41
-30.5	151.875	20191220	7	2019-12-20 17:00:02	5.84	18433.3	1.81	0.17	1.4
-30.5	151.875	20191220	8	2019-12-20 18:00:02	5.01	17929	1.75	0.17	1.4
-30.5	151.875	20191220	9	2019-12-20 19:00:02	4.14	17288.7	1.64	0.16	1.4
-30.5	151.875	20191220	10	2019-12-20 20:00:02	3.56	16311.9	1.52	0.15	1.4
-30.5	151.875	20191220	11	2019-12-20 21:00:02	3.22	15157.5	1.39	0.14	1.4
-30.5	151.875	20191220	12	2019-12-20 22:00:02	2.95	14611.7	1.33	0.14	1.4
-30.5	151.875	20191220	13	2019-12-20 23:00:02	2.7	14842.4	1.36	0.14	1.4
-30.5	151.875	20191220	14	2019-12-21 00:00:02	2.42	15554.2	1.43	0.15	1.4
-30.5	151.875	20191220	15	2019-12-21 01:00:02	2.18	16255.7	1.51	0.15	1.4
-30.5	151.875	20191220	16	2019-12-21 02:00:02	2.05	16458.5	1.52	0.15	1.4
-30.5	151.875	20191220	17	2019-12-21 03:00:02	2.06	16300.3	1.49	0.15	1.4
-30.5	151.875	20191220	18	2019-12-21 04:00:02	2.19	16083.9	1.45	0.15	1.4
-30.5	151.875	20191220	19	2019-12-21 05:00:02	2.4	15889.9	1.42	0.15	1.4
-30.5	151.875	20191220	20	2019-12-21 06:00:02	2.57	15704.3	1.39	0.15	1.4
-30.5	151.875	20191220	21	2019-12-21 07:00:02	2.63	15480.8	1.36	0.14	1.4
-30.5	151.875	20191220	22	2019-12-21 08:00:02	3.17	15138.6	1.32	0.14	1.4
-30.5	151.875	20191220	23	2019-12-21 09:00:02	3.93	14557.7	1.27	0.14	1.4
-30.5	151.875	20191221	0	2019-12-21 10:00:02	7.26	21023.8	1.83	0.2	1.4
-30.5	151.875	20191221	1	2019-12-21 11:00:02	7.41	21716	1.88	0.2	1.4
-30.5	151.875	20191221	2	2019-12-21 12:00:02	7.78	22886.4	1.96	0.21	1.4
-30.5	151.875	20191221	3	2019-12-21 13:00:02	4.06	14387.3	1.25	0.13	1.4
-30.5	151.875	20191221	4	2019-12-21 14:00:02	5.43	19096.2	1.67	0.18	1.4
-30.5	151.875	20191221	5	2019-12-21 15:00:02	7.12	25251.9	2.25	0.24	1.4
-30.5	151.875	20191221	6	2019-12-21 16:00:02	9.59	32961.8	2.98	0.31	1.4
-30.5	151.875	20191221	7	2019-12-21 17:00:02	12.61	40547.1	3.73	0.38	1.41
-30.5	151.875	20191221	8	2019-12-21 18:00:02	14.05	45704.5	4.3	0.43	1.41
-30.5	151.875	20191221	9	2019-12-21 19:00:02	14.94	47451.4	4.58	0.45	1.41
-30.5	151.875	20191221	10	2019-12-21 20:00:02	15.4	45665.4	4.49	0.43	1.41
-30.5	151.875	20191221	11	2019-12-21 21:00:02	15.21	40062.6	4.35	0.38	1.42
-30.5	151.875	20191221	12	2019-12-21 22:00:02	14.88	32955.3	3.62	0.32	1.42
-30.5	151.875	20191221	13	2019-12-21 23:00:02	15.17	28291.3	2.96	0.27	1.42
-30.5	151.875	20191221	14	2019-12-22 00:00:02	16.84	27106.2	2.67	0.26	1.41
-30.5	151.875	20191221	15	2019-12-22 01:00:02	18.47	26524.3	2.47	0.25	1.41
-30.5	151.875	20191221	16	2019-12-22 02:00:02	18.12	24706.6	2.27	0.23	1.4
-30.5	151.875	20191221	17	2019-12-22 03:00:02	14.31	22159.1	2.08	0.21	1.4
-30.5	151.875	20191221	18	2019-12-22 04:00:02	10.03	19671.3	1.91	0.18	1.4
-30.5	151.875	20191221	19	2019-12-22 05:00:02	6.42	17533.6	1.74	0.16	1.41
-30.5	151.875	20191221	20	2019-12-22 06:00:02	4.03	15722.8	1.56	0.15	1.41
-30.5	151.875	20191221	21	2019-12-22 07:00:02	3.21	14145.1	1.41	0.13	1.41
-30.5	151.875	20191221	22	2019-12-22 08:00:02	3.43	12825.9	1.28	0.12	1.41
-30.5	151.875	20191221	23	2019-12-22 09:00:02	4.42	12227.8	1.22	0.11	1.4
-30.5	151.875	20191222	0	2019-12-22 10:00:02	4.57	10739.6	1.08	0.1	1.41
-30.5	151.875	20191222	1	2019-12-22 11:00:02	4.58	11272.5	1.15	0.11	1.41
-30.5	151.875	20191222	2	2019-12-22 12:00:02	4.57	12226.6	1.28	0.12	1.41
-30.5	151.875	20191222	3	2019-12-22 13:00:02	3.76	11506.8	1.36	0.11	1.42
-30.5	151.875	20191222	4	2019-12-22 14:00:02	3.83	12522.8	1.78	0.13	1.44
-30.5	151.875	20191222	5	2019-12-22 15:00:02	3.77	13189	2.11	0.14	1.45
-30.5	151.875	20191222	6	2019-12-22 16:00:02	1.73	7537.33	1.5	0.08	1.47
-30.5	151.875	20191222	7	2019-12-22 17:00:02	1.75	7247.81	1.27	0.08	1.45
-30.5	151.875	20191222	8	2019-12-22 18:00:02	1.64	6828.92	1.05	0.07	1.43
-30.5	151.875	20191222	9	2019-12-22 19:00:02	1.47	6281.36	0.92	0.06	1.42
-30.5	151.875	20191222	10	2019-12-22 20:00:02	1.29	5606.58	0.86	0.06	1.43
-30.5	151.875	20191222	11	2019-12-22 21:00:02	1.13	4876.47	0.77	0.05	1.43
-30.5	151.875	20191222	12	2019-12-22 22:00:02	1.04	4381.79	0.66	0.04	1.43
-30.5	151.875	20191222	13	2019-12-22 23:00:02	1.01	4184.86	0.62	0.04	1.43
-30.5	151.875	20191222	14	2019-12-23 00:00:02	1.02	4257.4	0.62	0.04	1.44
-30.5	151.875	20191222	15	2019-12-23 01:00:02	1.04	4633.71	0.67	0.05	1.44
-30.5	151.875	20191222	16	2019-12-23 02:00:02	1.08	5174.22	0.73	0.05	1.44
-30.5	151.875	20191222	17	2019-12-23 03:00:02	1.14	5705.81	0.77	0.06	1.43
-30.5	151.875	20191222	18	2019-12-23 04:00:02	1.19	6090.38	0.81	0.06	1.43
-30.5	151.875	20191222	19	2019-12-23 05:00:02	1.21	6285.63	0.82	0.06	1.42
-30.5	151.875	20191222	20	2019-12-23 06:00:02	1.15	6372.79	0.82	0.06	1.42
-30.5	151.875	20191222	21	2019-12-23 07:00:02	1.05	6429.93	0.81	0.06	1.42
-30.5	151.875	20191222	22	2019-12-23 08:00:02	1.02	6420.33	0.83	0.06	1.42
-30.5	151.875	20191222	23	2019-12-23 09:00:02	1.19	6219.44	0.83	0.06	1.42
-30.5	151.875	20191223	0	2019-12-23 10:00:02	1.48	6093.05	0.83	0.06	1.43
-30.5	151.875	20191223	1	2019-12-23 11:00:02	1.65	5967.13	0.81	0.06	1.43
-30.5	151.875	20191223	2	2019-12-23 12:00:02	1.74	5624.43	0.77	0.06	1.43
-30.5	151.875	20191223	3	2019-12-23 13:00:02	1.47	4568.56	0.69	0.05	1.44
-30.5	151.875	20191223	4	2019-12-23 14:00:02	1.4	4166.34	0.66	0.04	1.45
-30.5	151.875	20191223	5	2019-12-23 15:00:02	1.28	3910.31	0.68	0.04	1.46
-30.5	151.875	20191223	6	2019-12-23 16:00:02	1.15	3678.65	0.79	0.04	1.49
-30.5	151.875	20191223	7	2019-12-23 17:00:02	1.02	3283.59	0.81	0.04	1.51
-30.5	151.875	20191223	8	2019-12-23 18:00:02	0.92	2988.04	0.79	0.04	1.52
-30.5	151.875	20191223	9	2019-12-23 19:00:02	0.84	2814.31	0.76	0.04	1.53
-30.5	151.875	20191223	10	2019-12-23 20:00:02	0.74	2604.06	0.68	0.03	1.52
-30.5	151.875	20191223	11	2019-12-23 21:00:02	0.66	2318.64	0.58	0.03	1.51
-30.5	151.875	20191223	12	2019-12-23 22:00:02	0.58	2088.72	0.45	0.02	1.48
-30.5	151.875	20191223	13	2019-12-23 23:00:02	0.5	2173.68	0.53	0.03	1.5
-30.5	151.875	20191223	14	2019-12-24 00:00:02	0.45	2219.88	0.5	0.03	1.49
-30.5	151.875	20191223	15	2019-12-24 01:00:02	0.44	2172.4	0.43	0.02	1.46
-30.5	151.875	20191223	16	2019-12-24 02:00:02	0.45	2170.61	0.42	0.02	1.45
-30.5	151.875	20191223	17	2019-12-24 03:00:02	0.48	2239.55	0.43	0.02	1.45
-30.5	151.875	20191223	18	2019-12-24 04:00:02	0.52	2360.59	0.46	0.03	1.45
-30.5	151.875	20191223	19	2019-12-24 05:00:02	0.58	2477.95	0.47	0.03	1.46
-30.5	151.875	20191223	20	2019-12-24 06:00:02	0.64	2557.23	0.47	0.03	1.45
-30.5	151.875	20191223	21	2019-12-24 07:00:02	0.75	2507.71	0.45	0.03	1.46
-30.5	151.875	20191223	22	2019-12-24 08:00:02	0.68	2401.84	0.48	0.03	1.48
-30.5	151.875	20191223	23	2019-12-24 09:00:02	0.64	2251.58	0.5	0.03	1.5
-30.5	151.875	20191224	0	2019-12-24 10:00:02	0.6	2097.28	0.48	0.02	1.5
-30.5	151.875	20191224	1	2019-12-24 11:00:02	0.59	2103.48	0.5	0.02	1.51
-30.5	151.875	20191224	2	2019-12-24 12:00:02	0.59	2211.76	0.55	0.03	1.52
-30.5	151.875	20191224	3	2019-12-24 13:00:02	0.61	2358.54	0.62	0.03	1.53
-30.5	151.875	20191224	4	2019-12-24 14:00:02	0.65	2552.52	0.69	0.03	1.53
-30.5	151.875	20191224	5	2019-12-24 15:00:02	0.71	2745.73	0.71	0.03	1.52
-30.5	151.875	20191224	6	2019-12-24 16:00:02	0.89	2888.92	0.68	0.03	1.51
-30.5	151.875	20191224	7	2019-12-24 17:00:02	0.97	2898.07	0.62	0.03	1.49
-30.5	151.875	20191224	8	2019-12-24 18:00:02	0.8	2832.16	0.56	0.03	1.48
-30.5	151.875	20191224	9	2019-12-24 19:00:02	0.68	2651.77	0.49	0.03	1.47
-30.5	151.875	20191224	10	2019-12-24 20:00:02	0.45	2369.18	0.42	0.03	1.46
-30.5	151.875	20191224	11	2019-12-24 21:00:02	0.27	2088.91	0.34	0.02	1.46
-30.5	151.875	20191224	12	2019-12-24 22:00:02	0.17	1927.99	0.3	0.02	1.45
-30.5	151.875	20191224	13	2019-12-24 23:00:02	0.13	1880.69	0.26	0.02	1.44
-30.5	151.875	20191224	14	2019-12-25 00:00:02	0.1	1919.89	0.25	0.02	1.44
-30.5	151.875	20191224	15	2019-12-25 01:00:02	0.09	2040.93	0.27	0.02	1.44
-30.5	151.875	20191224	16	2019-12-25 02:00:02	0.09	2232.53	0.29	0.02	1.44
-30.5	151.875	20191224	17	2019-12-25 03:00:02	0.1	2411.17	0.3	0.02	1.44
-30.5	151.875	20191224	18	2019-12-25 04:00:02	0.11	2493.92	0.3	0.02	1.43
-30.5	151.875	20191224	19	2019-12-25 05:00:02	0.13	2495.25	0.29	0.02	1.43
-30.5	151.875	20191224	20	2019-12-25 06:00:02	0.15	2435.2	0.28	0.02	1.42
-30.5	151.875	20191224	21	2019-12-25 07:00:02	0.16	2331.96	0.27	0.02	1.42
-30.5	151.875	20191224	22	2019-12-25 08:00:02	0.16	2202.53	0.26	0.02	1.42
-30.5	151.875	20191224	23	2019-12-25 09:00:02	0.15	2035.43	0.24	0.02	1.43
-30.5	151.875	20191225	0	2019-12-25 10:00:02	0.21	2092.91	0.28	0.02	1.43
-30.5	151.875	20191225	1	2019-12-25 11:00:02	0.21	1872.51	0.27	0.02	1.44
-30.5	151.875	20191225	2	2019-12-25 12:00:02	0.23	1692.45	0.25	0.02	1.45
-30.5	151.875	20191225	3	2019-12-25 13:00:02	0.19	1345.85	0.21	0.01	1.45
-30.5	151.875	20191225	4	2019-12-25 14:00:02	0.2	1216.38	0.22	0.01	1.47
-30.5	151.875	20191225	5	2019-12-25 15:00:02	0.21	1084.52	0.21	0.01	1.47
-30.5	151.875	20191225	6	2019-12-25 16:00:02	0.21	996.32	0.2	0.01	1.47
-30.5	151.875	20191225	7	2019-12-25 17:00:02	0.24	940.03	0.2	0.01	1.47
-30.5	151.875	20191225	8	2019-12-25 18:00:02	0.28	888.4	0.18	0.01	1.46
-30.5	151.875	20191225	9	2019-12-25 19:00:02	0.26	838.72	0.15	0.01	1.46
-30.5	151.875	20191225	10	2019-12-25 20:00:02	0.24	829.81	0.13	0.01	1.45
-30.5	151.875	20191225	11	2019-12-25 21:00:02	0.23	872.37	0.13	0.01	1.44
-30.5	151.875	20191225	12	2019-12-25 22:00:02	0.23	956.2	0.13	0.01	1.44
-30.5	151.875	20191225	13	2019-12-25 23:00:02	0.24	1061.41	0.15	0.01	1.43
-30.5	151.875	20191225	14	2019-12-26 00:00:02	0.25	1156.13	0.15	0.01	1.43
-30.5	151.875	20191225	15	2019-12-26 01:00:02	0.25	1226.83	0.15	0.01	1.43
-30.5	151.875	20191225	16	2019-12-26 02:00:02	0.24	1278.89	0.14	0.01	1.42
-30.5	151.875	20191225	17	2019-12-26 03:00:02	0.23	1317.73	0.14	0.01	1.42
-30.5	151.875	20191225	18	2019-12-26 04:00:02	0.22	1339.02	0.14	0.01	1.42
-30.5	151.875	20191225	19	2019-12-26 05:00:02	0.2	1339.02	0.14	0.01	1.42
-30.5	151.875	20191225	20	2019-12-26 06:00:02	0.19	1323.3	0.14	0.01	1.42
-30.5	151.875	20191225	21	2019-12-26 07:00:02	0.23	1304.45	0.15	0.01	1.42
-30.5	151.875	20191225	22	2019-12-26 08:00:02	0.31	1281.43	0.15	0.01	1.42
-30.5	151.875	20191225	23	2019-12-26 09:00:02	0.36	1253.24	0.14	0.01	1.41
-30.5	151.875	20191226	0	2019-12-26 10:00:02	0.31	964.44	0.1	0.01	1.41
-30.5	151.875	20191226	1	2019-12-26 11:00:03	0.28	851.86	0.09	0.01	1.41
-30.5	151.875	20191226	2	2019-12-26 12:00:03	0.23	753.26	0.07	0.01	1.4
-30.5	151.875	20191226	3	2019-12-26 13:00:03	0.41	1472.84	0.15	0.01	1.4
-30.5	151.875	20191226	4	2019-12-26 14:00:03	0.36	1316.34	0.13	0.01	1.4
-30.5	151.875	20191226	5	2019-12-26 15:00:03	0.31	1185.46	0.12	0.01	1.4
-30.5	151.875	20191226	6	2019-12-26 16:00:03	0.28	1092.84	0.12	0.01	1.4
-30.5	151.875	20191226	7	2019-12-26 17:00:03	0.25	1053.04	0.11	0.01	1.4
-30.5	151.875	20191226	8	2019-12-26 18:00:03	0.23	1100.14	0.11	0.01	1.4
-30.5	151.875	20191226	9	2019-12-26 19:00:03	0.2	1244.05	0.12	0.01	1.41
-30.5	151.875	20191226	10	2019-12-26 20:00:03	0.16	1406.53	0.14	0.01	1.41
-30.5	151.875	20191226	11	2019-12-26 21:00:03	0.13	1443.26	0.14	0.01	1.41
-30.5	151.875	20191226	12	2019-12-26 22:00:03	0.1	1320.14	0.13	0.01	1.41
-30.5	151.875	20191226	13	2019-12-26 23:00:03	0.08	1125.98	0.11	0.01	1.41
-30.5	151.875	20191226	14	2019-12-27 00:00:03	0.07	947.39	0.09	0.01	1.41
-30.5	151.875	20191226	15	2019-12-27 01:00:03	0.1	801.01	0.08	0.01	1.41
-30.5	151.875	20191226	16	2019-12-27 02:00:03	0.12	684.35	0.06	0.01	1.42
-30.5	151.875	20191226	17	2019-12-27 03:00:03	0.11	601.32	0.06	0.01	1.42
-30.5	151.875	20191226	18	2019-12-27 04:00:03	0.09	544.54	0.05	0.01	1.42
-30.5	151.875	20191226	19	2019-12-27 05:00:03	0.07	507.1	0.04	0	1.41
-30.5	151.875	20191226	20	2019-12-27 06:00:03	0.06	482.06	0.04	0	1.41
-30.5	151.875	20191226	21	2019-12-27 07:00:03	0.06	463.2	0.03	0	1.4
-30.5	151.875	20191226	22	2019-12-27 08:00:03	0.06	448.9	0.03	0	1.4
-30.5	151.875	20191226	23	2019-12-27 09:00:03	0.05	437.51	0.03	0	1.4
-30.5	151.875	20191227	0	2019-12-27 10:00:03	0.05	425.01	0.03	0	1.4
-30.5	151.875	20191227	1	2019-12-27 11:00:03	0.04	398.62	0.03	0	1.4
-30.5	151.875	20191227	2	2019-12-27 12:00:03	0.04	384.7	0.03	0	1.4
-30.5	151.875	20191227	3	2019-12-27 13:00:03	0.06	463.43	0.03	0	1.4
-30.5	151.875	20191227	4	2019-12-27 14:00:03	0.05	416.34	0.03	0	1.4
-30.5	151.875	20191227	5	2019-12-27 15:00:03	0.04	384.68	0.03	0	1.4
-30.5	151.875	20191227	6	2019-12-27 16:00:03	0.04	371.17	0.03	0	1.4
-30.5	151.875	20191227	7	2019-12-27 17:00:03	0.04	369.68	0.03	0	1.4
-30.5	151.875	20191227	8	2019-12-27 18:00:03	0.05	377.95	0.03	0	1.4
-30.5	151.875	20191227	9	2019-12-27 19:00:03	0.07	391.17	0.03	0	1.4
-30.5	151.875	20191227	10	2019-12-27 20:00:03	0.08	404.63	0.04	0	1.41
-30.5	151.875	20191227	11	2019-12-27 21:00:03	0.1	415.96	0.04	0	1.41
-30.5	151.875	20191227	12	2019-12-27 22:00:03	0.11	425.52	0.05	0	1.42
-30.5	151.875	20191227	13	2019-12-27 23:00:03	0.12	433.63	0.05	0	1.42
-30.5	151.875	20191227	14	2019-12-28 00:00:03	0.12	440.11	0.05	0	1.42
-30.5	151.875	20191227	15	2019-12-28 01:00:03	0.13	446.1	0.05	0	1.42
-30.5	151.875	20191227	16	2019-12-28 02:00:03	0.12	450.07	0.04	0	1.42
-30.5	151.875	20191227	17	2019-12-28 03:00:03	0.12	450.68	0.04	0	1.42
-30.5	151.875	20191227	18	2019-12-28 04:00:03	0.12	448.74	0.04	0	1.42
-30.5	151.875	20191227	19	2019-12-28 05:00:03	0.11	445.13	0.04	0	1.42
-30.5	151.875	20191227	20	2019-12-28 06:00:03	0.1	440.77	0.04	0	1.41
-30.5	151.875	20191227	21	2019-12-28 07:00:03	0.09	435.9	0.03	0	1.4
-30.5	151.875	20191227	22	2019-12-28 08:00:03	0.08	431.08	0.03	0	1.4
-30.5	151.875	20191227	23	2019-12-28 09:00:03	0.07	425.65	0.03	0	1.4
-30.5	151.875	20191228	0	2019-12-28 10:00:03	0.15	731.68	0.06	0.01	1.4
-30.5	151.875	20191228	1	2019-12-28 11:00:03	0.18	719.6	0.06	0.01	1.4
-30.5	151.875	20191228	2	2019-12-28 12:00:03	0.21	743.08	0.06	0.01	1.4
-30.5	151.875	20191228	3	2019-12-28 13:00:03	0.27	1028	0.08	0.01	1.4
-30.5	151.875	20191228	4	2019-12-28 14:00:03	0.28	1031.78	0.08	0.01	1.4
-30.5	151.875	20191228	5	2019-12-28 15:00:03	0.27	1017.52	0.08	0.01	1.4
-30.5	151.875	20191228	6	2019-12-28 16:00:03	0.25	996.76	0.08	0.01	1.4
-30.5	151.875	20191228	7	2019-12-28 17:00:03	0.24	1010.31	0.08	0.01	1.4
-30.5	151.875	20191228	8	2019-12-28 18:00:03	0.24	1157.42	0.09	0.01	1.4
-30.5	151.875	20191228	9	2019-12-28 19:00:03	0.26	1540.48	0.12	0.01	1.4
-30.5	151.875	20191228	10	2019-12-28 20:00:03	0.28	2140.08	0.17	0.02	1.4
-30.5	151.875	20191228	11	2019-12-28 21:00:03	0.31	2856.73	0.22	0.03	1.4
-30.5	151.875	20191228	12	2019-12-28 22:00:03	0.33	3667.07	0.28	0.03	1.4
-30.5	151.875	20191228	13	2019-12-28 23:00:03	0.32	4443.74	0.35	0.04	1.4
-30.5	151.875	20191228	14	2019-12-29 00:00:03	0.31	4990.19	0.39	0.05	1.4
-30.5	151.875	20191228	15	2019-12-29 01:00:03	0.3	5207.6	0.41	0.05	1.4
-30.5	151.875	20191228	16	2019-12-29 02:00:03	0.3	5070.3	0.4	0.05	1.4
-30.5	151.875	20191228	17	2019-12-29 03:00:03	0.3	4694.46	0.37	0.04	1.4
-30.5	151.875	20191228	18	2019-12-29 04:00:03	0.29	4163.47	0.32	0.04	1.4
-30.5	151.875	20191228	19	2019-12-29 05:00:03	0.28	3569.49	0.28	0.03	1.4
-30.5	151.875	20191228	20	2019-12-29 06:00:03	0.27	2991.67	0.23	0.03	1.4
-30.5	151.875	20191228	21	2019-12-29 07:00:03	0.32	2505.52	0.2	0.02	1.4
-30.5	151.875	20191228	22	2019-12-29 08:00:03	0.66	2124.84	0.17	0.02	1.4
-30.5	151.875	20191228	23	2019-12-29 09:00:03	0.96	1910.03	0.15	0.02	1.4
-30.5	151.875	20191229	0	2019-12-29 10:00:03	0.84	1713.79	0.13	0.02	1.4
-30.5	151.875	20191229	1	2019-12-29 11:00:03	0.78	1827.5	0.14	0.02	1.4
-30.5	151.875	20191229	2	2019-12-29 12:00:03	0.75	1926.95	0.15	0.02	1.4
-30.5	151.875	20191229	3	2019-12-29 13:00:03	0.71	1964.62	0.15	0.02	1.4
-30.5	151.875	20191229	4	2019-12-29 14:00:03	0.68	2071.62	0.16	0.02	1.4
-30.5	151.875	20191229	5	2019-12-29 15:00:03	0.62	2166.17	0.17	0.02	1.4
-30.5	151.875	20191229	6	2019-12-29 16:00:03	0.6	2557.66	0.2	0.02	1.4
-30.5	151.875	20191229	7	2019-12-29 17:00:03	0.53	2842.23	0.23	0.03	1.4
-30.5	151.875	20191229	8	2019-12-29 18:00:03	0.5	3770.28	0.32	0.04	1.4
-30.5	151.875	20191229	9	2019-12-29 19:00:03	0.55	5741.22	0.5	0.05	1.4
-30.5	151.875	20191229	10	2019-12-29 20:00:03	0.55	8417.02	0.75	0.08	1.4
-30.5	151.875	20191229	11	2019-12-29 21:00:03	0.51	10838	0.98	0.1	1.4
-30.5	151.875	20191229	12	2019-12-29 22:00:03	0.47	11724.7	1.08	0.11	1.4
-30.5	151.875	20191229	13	2019-12-29 23:00:03	0.41	11069.2	1.03	0.1	1.4
-30.5	151.875	20191229	14	2019-12-30 00:00:03	0.35	9430.35	0.87	0.09	1.4
-30.5	151.875	20191229	15	2019-12-30 01:00:03	0.3	7341.82	0.67	0.07	1.4
-30.5	151.875	20191229	16	2019-12-30 02:00:03	0.26	5262.19	0.47	0.05	1.4
-30.5	151.875	20191229	17	2019-12-30 03:00:03	0.24	3731.73	0.32	0.03	1.4
-30.5	151.875	20191229	18	2019-12-30 04:00:03	0.22	2751.34	0.24	0.03	1.4
-30.5	151.875	20191229	19	2019-12-30 05:00:03	0.21	2062.75	0.17	0.02	1.4
-30.5	151.875	20191229	20	2019-12-30 06:00:03	0.19	1524.82	0.13	0.01	1.4
-30.5	151.875	20191229	21	2019-12-30 07:00:03	0.17	1126.34	0.09	0.01	1.4
-30.5	151.875	20191229	22	2019-12-30 08:00:03	0.2	888.95	0.07	0.01	1.4
-30.5	151.875	20191229	23	2019-12-30 09:00:03	0.25	807.14	0.07	0.01	1.4
-30.5	151.875	20191230	0	2019-12-30 10:00:03	0.53	1382.61	0.11	0.01	1.4
-30.5	151.875	20191230	1	2019-12-30 11:00:03	1.04	2569.54	0.2	0.02	1.4
-30.5	151.875	20191230	2	2019-12-30 12:00:03	1.52	4000.06	0.31	0.04	1.4
-30.5	151.875	20191230	3	2019-12-30 13:00:03	1.35	3944.06	0.31	0.04	1.4
-30.5	151.875	20191230	4	2019-12-30 14:00:03	1.69	5155.75	0.4	0.05	1.4
-30.5	151.875	20191230	5	2019-12-30 15:00:03	1.76	5626.81	0.45	0.05	1.4
-30.5	151.875	20191230	6	2019-12-30 16:00:03	1.64	5662.79	0.46	0.05	1.4
-30.5	151.875	20191230	7	2019-12-30 17:00:03	1.43	5583.4	0.46	0.05	1.4
-30.5	151.875	20191230	8	2019-12-30 18:00:03	1.28	5512.12	0.47	0.05	1.4
-30.5	151.875	20191230	9	2019-12-30 19:00:03	1.11	5739.98	0.5	0.05	1.4
-30.5	151.875	20191230	10	2019-12-30 20:00:03	0.89	6214.65	0.55	0.06	1.4
-30.5	151.875	20191230	11	2019-12-30 21:00:03	0.69	6612.85	0.59	0.06	1.4
-30.5	151.875	20191230	12	2019-12-30 22:00:03	0.6	6744.86	0.61	0.06	1.4
-30.5	151.875	20191230	13	2019-12-30 23:00:03	0.55	6515.66	0.59	0.06	1.4
-30.5	151.875	20191230	14	2019-12-31 00:00:03	0.46	5981.26	0.55	0.06	1.4
-30.5	151.875	20191230	15	2019-12-31 01:00:03	0.38	5366.73	0.49	0.05	1.4
-30.5	151.875	20191230	16	2019-12-31 02:00:03	0.34	4878.03	0.45	0.05	1.4
-30.5	151.875	20191230	17	2019-12-31 03:00:03	0.35	4502.71	0.42	0.04	1.4
-30.5	151.875	20191230	18	2019-12-31 04:00:03	0.37	4085.27	0.39	0.04	1.4
-30.5	151.875	20191230	19	2019-12-31 05:00:03	0.34	3602.74	0.34	0.03	1.4
-30.5	151.875	20191230	20	2019-12-31 06:00:03	0.25	3117	0.29	0.03	1.4
-30.5	151.875	20191230	21	2019-12-31 07:00:03	0.19	2665.53	0.25	0.02	1.4
-30.5	151.875	20191230	22	2019-12-31 08:00:03	0.19	2353.14	0.22	0.02	1.4
-30.5	151.875	20191230	23	2019-12-31 09:00:03	0.34	2290.96	0.21	0.02	1.4
-30.5	151.875	20191231	0	2019-12-31 10:00:03	0.62	2772.96	0.25	0.03	1.4
-30.5	151.875	20191231	1	2019-12-31 11:00:03	0.85	3014.77	0.27	0.03	1.4
-30.5	151.875	20191231	2	2019-12-31 12:00:03	1.01	3500.01	0.31	0.03	1.4
-30.5	151.875	20191231	3	2019-12-31 13:00:03	1.27	4754.73	0.42	0.04	1.4
-30.5	151.875	20191231	4	2019-12-31 14:00:03	1.39	5505.88	0.51	0.05	1.41
-30.5	151.875	20191231	5	2019-12-31 15:00:03	1.49	6149.29	0.69	0.06	1.42
-30.5	151.875	20191231	6	2019-12-31 16:00:03	0.74	3236.98	0.43	0.03	1.43
-30.5	151.875	20191231	7	2019-12-31 17:00:03	0.88	3801.06	0.52	0.04	1.43
-30.5	151.875	20191231	8	2019-12-31 18:00:03	0.92	4437.38	0.6	0.04	1.43
-30.5	151.875	20191231	9	2019-12-31 19:00:03	0.9	5152.79	0.71	0.05	1.43
-30.5	151.875	20191231	10	2019-12-31 20:00:03	0.88	5969.65	0.79	0.06	1.43
-30.5	151.875	20191231	11	2019-12-31 21:00:03	0.84	6827.91	0.85	0.07	1.42
-30.5	151.875	20191231	12	2019-12-31 22:00:03	0.8	7619.05	0.87	0.07	1.41
-30.5	151.875	20191231	13	2019-12-31 23:00:03	0.75	8225.8	0.87	0.08	1.41
-30.5	151.875	20191231	14	2020-01-01 00:00:03	0.68	8542.08	0.87	0.08	1.4
-30.5	151.875	20191231	15	2020-01-01 01:00:03	0.61	8471.16	0.84	0.08	1.4
-30.5	151.875	20191231	16	2020-01-01 02:00:03	0.54	7987.38	0.81	0.07	1.4
-30.5	151.875	20191231	17	2020-01-01 03:00:03	0.46	7261.38	0.77	0.07	1.4
-30.5	151.875	20191231	18	2020-01-01 04:00:03	0.38	6522.09	0.74	0.06	1.41
-30.5	151.875	20191231	19	2020-01-01 05:00:03	0.3	5909.39	0.76	0.06	1.42
-30.5	151.875	20191231	20	2020-01-01 06:00:03	0.25	5462.46	0.75	0.05	1.43
-30.5	151.875	20191231	21	2020-01-01 07:00:03	0.26	5147.7	0.65	0.05	1.42
-30.5	151.875	20191231	22	2020-01-01 08:00:03	0.38	4906.11	0.59	0.05	1.41
-30.5	151.875	20191231	23	2020-01-01 09:00:03	0.54	4740.33	0.56	0.04	1.41
