# Supplementary material for: Black Carbon Emission, Transport and Effect on Radiation Forcing Modelling During the Summer 2019–2020 Wildfires in Southeast Australia
Source: Preprints.org preprint supplement (doi:10.20944/preprints202302.0293.v1), 2023-02-17
Supplement: Supplementary file 11 [file merra_bc_201912_1650.xlsx]

## Sheet: merra_bc_201912_1650
lat	lon	date	time	date_time	bc	bccmass	totexttau	bcexttau	bcangstr			Date	MERRA-2 Predicted BC	Observed PM₂ι₅						Observed BC	WRF-Chem predicted BC
-35	147.5	20191201	0	2019-12-01 10:00:00	0.05	427.06	0.09	0.01	1.53			2019-12-01	0.0635714	0						0.112542	0
-35	147.5	20191201	1	2019-12-01 11:00:00	0.05	399.5	0.1	0.01	1.58			2019-12-02	0.0525	4.0875				WAGGA WAGGA NTH BC7 1h average [ng/m³]	BC(ng/m3)	0.0833478	0
-35	147.5	20191201	2	2019-12-01 12:00:00	0.05	364.77	0.1	0.01	1.59			2019-12-03	0.0991667	4.06667				112.542	0	0.108208	0
-35	147.5	20191201	3	2019-12-01 13:00:00	0.01	304.74	0.08	0	1.63			2019-12-04	0.14	9.04583				83.3478	0	0.162667	0
-35	147.5	20191201	4	2019-12-01 14:00:00	0.03	397.85	0.11	0.01	1.63			2019-12-05	0.274167	30.7625				108.208	0	0.38555	0
-35	147.5	20191201	5	2019-12-01 15:00:00	0.04	471.99	0.12	0.01	1.6			2019-12-06	0.222083	19.3208				162.667	0	0.207292	0.000538333
-35	147.5	20191201	6	2019-12-01 16:00:00	0.05	498.92	0.09	0.01	1.5			2019-12-07	0.1525	86.3708				385.55	0	0.188083	0.41021
-35	147.5	20191201	7	2019-12-01 17:00:00	0.06	471.86	0.07	0	1.45			2019-12-08	0.42125	24.8167				207.292	0.322497	0.412958	0.0586783
-35	147.5	20191201	8	2019-12-01 18:00:00	0.06	417.35	0.07	0	1.49			2019-12-09	2.73083	64.8				188.083	245.743	2.96113	0.548562
-35	147.5	20191201	9	2019-12-01 19:00:00	0.08	385.21	0.09	0	1.54			2019-12-10	1.12125	98.9625				412.958	35.1522	1.29646	0.818805
-35	147.5	20191201	10	2019-12-01 20:00:00	0.09	372.77	0.1	0	1.55			2019-12-11	0.392917	24.5458				2961.13	328.625	0.406958	0.50065
-35	147.5	20191201	11	2019-12-01 21:00:00	0.1	366.81	0.12	0	1.58			2019-12-12	0.342917	18.0375				1296.46	490.519	0.394375	0.098515
-35	147.5	20191201	12	2019-12-01 22:00:00	0.11	342.93	0.12	0	1.58			2019-12-13	0.177917	9.0375				406.958	299.923	0.2055	0.288547
-35	147.5	20191201	13	2019-12-01 23:00:00	0.11	342.19	0.13	0	1.57			2019-12-14	0.135833	39.3667				394.375	59.017	0.144083	0
-35	147.5	20191201	14	2019-12-02 00:00:00	0.15	393.03	0.15	0	1.54			2019-12-15	0.16375	30.5083				205.5	172.859	0.205958	0.00699833
-35	147.5	20191201	15	2019-12-02 01:00:00	0.12	384.5	0.11	0	1.47			2019-12-16	0.154583	23.0625				144.083	0	0.176522	0.479117
-35	147.5	20191201	16	2019-12-02 02:00:00	0.07	348.15	0.09	0	1.45			2019-12-17	2.465	8.05417				205.958	4.19247	3.30404	1.09066
-35	147.5	20191201	17	2019-12-02 03:00:00	0.07	333.54	0.1	0	1.44			2019-12-18	4.245	30.8375				176.522	287.023	3.32808	1.57947
-35	147.5	20191201	18	2019-12-02 04:00:00	0.08	336.8	0.11	0	1.45			2019-12-19	1.82125	46.8458				3304.04	653.38	1.69121	1.0869
-35	147.5	20191201	19	2019-12-02 05:00:00	0.08	346.5	0.11	0	1.44			2019-12-20	3.9675	7.46667				3328.08	946.207	16.9559	2.12696
-35	147.5	20191201	20	2019-12-02 06:00:00	0.09	354.53	0.1	0	1.44			2019-12-21	1.17417	49.6542				1691.21	651.122	3.05012	1.44166
-35	147.5	20191201	21	2019-12-02 07:00:00	0.06	370.3	0.09	0	1.43			2019-12-22	2.80333	15.3625				16955.9	1274.19	3.80671	1.41205
-35	147.5	20191201	22	2019-12-02 08:00:00	0.03	371.6	0.07	0	1.42			2019-12-23	2.96958	14.0708				3050.12	863.648	#DIV/0!	1.44273
-35	147.5	20191201	23	2019-12-02 09:00:00	0.03	368.16	0.06	0	1.41			2019-12-24	2.87375	10.1667				3806.71	845.911	#DIV/0!	1.05298
-35	147.5	20191202	0	2019-12-02 10:00:00	0.01	345.6	0.05	0	1.41			2019-12-25	1.27833	13.1083				#DIV/0!	864.293	#DIV/0!	0.54264
-35	147.5	20191202	1	2019-12-02 11:00:00	0.01	358.09	0.06	0	1.41			2019-12-26	2.05167	10.7125				#DIV/0!	630.805	#DIV/0!	0.679915
-35	147.5	20191202	2	2019-12-02 12:00:00	0.02	356.96	0.06	0	1.41			2019-12-27	2.22917	8.79583				#DIV/0!	325.077	#DIV/0!	1.36898
-35	147.5	20191202	3	2019-12-02 13:00:00	0.01	340.7	0.05	0	1.41			2019-12-28	1.63833	16.65				#DIV/0!	407.314	#DIV/0!	0.962002
-35	147.5	20191202	4	2019-12-02 14:00:00	0.02	342.47	0.05	0	1.41			2019-12-29	2.05667	44.2708				#DIV/0!	820.111	#DIV/0!	0.446817
-35	147.5	20191202	5	2019-12-02 15:00:00	0.02	336.57	0.05	0	1.41			2019-12-30	1.5925	61.2667				#DIV/0!	576.303	0.180231	0.460275
-35	147.5	20191202	6	2019-12-02 16:00:00	0.02	313.84	0.06	0	1.41			2019-12-31	0.715833	52.4375				#DIV/0!	267.673	0.433292	0.123817
-35	147.5	20191202	7	2019-12-02 17:00:00	0.02	303.55	0.07	0	1.41			2020-01-01	4.057	17.1545				180.231	275.735
-35	147.5	20191202	8	2019-12-02 18:00:00	0.03	320.85	0.07	0	1.41									433.292	74.1744
-35	147.5	20191202	9	2019-12-02 19:00:00	0.04	325.23	0.07	0	1.42
-35	147.5	20191202	10	2019-12-02 20:00:00	0.05	332.44	0.06	0	1.42
-35	147.5	20191202	11	2019-12-02 21:00:00	0.06	345.45	0.06	0	1.41
-35	147.5	20191202	12	2019-12-02 22:00:00	0.08	363.88	0.05	0	1.41
-35	147.5	20191202	13	2019-12-02 23:00:00	0.09	385.29	0.05	0	1.4
-35	147.5	20191202	14	2019-12-03 00:00:00	0.1	405.31	0.05	0	1.4
-35	147.5	20191202	15	2019-12-03 01:00:00	0.11	419.41	0.05	0	1.4
-35	147.5	20191202	16	2019-12-03 02:00:00	0.11	434.7	0.05	0	1.4
-35	147.5	20191202	17	2019-12-03 03:00:00	0.12	471.54	0.05	0	1.4
-35	147.5	20191202	18	2019-12-03 04:00:00	0.13	506.16	0.05	0	1.4
-35	147.5	20191202	19	2019-12-03 05:00:00	0.14	525.04	0.06	0	1.4
-35	147.5	20191202	20	2019-12-03 06:00:00	0.1	536.86	0.06	0.01	1.4
-35	147.5	20191202	21	2019-12-03 07:00:00	0.05	533.21	0.06	0.01	1.41
-35	147.5	20191202	22	2019-12-03 08:00:00	0.05	521.14	0.05	0	1.41
-35	147.5	20191202	23	2019-12-03 09:00:00	0.04	519.24	0.05	0	1.41
-35	147.5	20191203	0	2019-12-03 10:00:00	0.04	517.43	0.06	0	1.41
-35	147.5	20191203	1	2019-12-03 11:00:00	0.04	517.26	0.06	0	1.41
-35	147.5	20191203	2	2019-12-03 12:00:00	0.04	513.78	0.06	0	1.41
-35	147.5	20191203	3	2019-12-03 13:00:00	0.25	910.96	0.15	0.01	1.41
-35	147.5	20191203	4	2019-12-03 14:00:00	0.25	889.52	0.13	0.01	1.41
-35	147.5	20191203	5	2019-12-03 15:00:00	0.2	773.42	0.11	0.01	1.41
-35	147.5	20191203	6	2019-12-03 16:00:00	0.11	618.01	0.09	0.01	1.41
-35	147.5	20191203	7	2019-12-03 17:00:00	0.05	522.97	0.07	0	1.41
-35	147.5	20191203	8	2019-12-03 18:00:00	0.04	506.89	0.07	0	1.41
-35	147.5	20191203	9	2019-12-03 19:00:00	0.05	501.92	0.07	0	1.41
-35	147.5	20191203	10	2019-12-03 20:00:00	0.06	496.42	0.06	0	1.4
-35	147.5	20191203	11	2019-12-03 21:00:00	0.08	501.91	0.06	0	1.4
-35	147.5	20191203	12	2019-12-03 22:00:00	0.1	516.53	0.06	0	1.4
-35	147.5	20191203	13	2019-12-03 23:00:00	0.12	533.46	0.06	0.01	1.4
-35	147.5	20191203	14	2019-12-04 00:00:00	0.14	544.69	0.06	0.01	1.4
-35	147.5	20191203	15	2019-12-04 01:00:00	0.15	541.59	0.06	0.01	1.4
-35	147.5	20191203	16	2019-12-04 02:00:00	0.16	541.17	0.06	0.01	1.4
-35	147.5	20191203	17	2019-12-04 03:00:00	0.17	550.89	0.06	0.01	1.4
-35	147.5	20191203	18	2019-12-04 04:00:00	0.18	557.82	0.07	0.01	1.4
-35	147.5	20191203	19	2019-12-04 05:00:00	0.19	559.54	0.07	0.01	1.41
-35	147.5	20191203	20	2019-12-04 06:00:00	0.14	564.25	0.07	0.01	1.4
-35	147.5	20191203	21	2019-12-04 07:00:00	0.08	567.91	0.07	0.01	1.4
-35	147.5	20191203	22	2019-12-04 08:00:00	0.07	567.51	0.07	0.01	1.4
-35	147.5	20191203	23	2019-12-04 09:00:00	0.07	577.53	0.06	0.01	1.4
-35	147.5	20191204	0	2019-12-04 10:00:00	0.08	595.39	0.06	0.01	1.4
-35	147.5	20191204	1	2019-12-04 11:00:00	0.07	606	0.06	0.01	1.4
-35	147.5	20191204	2	2019-12-04 12:00:00	0.07	608.66	0.06	0.01	1.4
-35	147.5	20191204	3	2019-12-04 13:00:00	0.03	529.87	0.04	0	1.4
-35	147.5	20191204	4	2019-12-04 14:00:00	0.04	518.46	0.04	0	1.4
-35	147.5	20191204	5	2019-12-04 15:00:00	0.04	513.66	0.04	0	1.4
-35	147.5	20191204	6	2019-12-04 16:00:00	0.11	755.43	0.06	0.01	1.4
-35	147.5	20191204	7	2019-12-04 17:00:00	0.13	789.01	0.07	0.01	1.4
-35	147.5	20191204	8	2019-12-04 18:00:00	0.16	838.34	0.08	0.01	1.4
-35	147.5	20191204	9	2019-12-04 19:00:00	0.19	881.17	0.09	0.01	1.4
-35	147.5	20191204	10	2019-12-04 20:00:00	0.22	914.1	0.09	0.01	1.4
-35	147.5	20191204	11	2019-12-04 21:00:00	0.26	915.46	0.1	0.01	1.4
-35	147.5	20191204	12	2019-12-04 22:00:00	0.29	893.32	0.1	0.01	1.4
-35	147.5	20191204	13	2019-12-04 23:00:00	0.32	861.86	0.1	0.01	1.4
-35	147.5	20191204	14	2019-12-05 00:00:00	0.35	814.12	0.1	0.01	1.4
-35	147.5	20191204	15	2019-12-05 01:00:00	0.37	760.46	0.1	0.01	1.4
-35	147.5	20191204	16	2019-12-05 02:00:00	0.39	714.2	0.1	0.01	1.4
-35	147.5	20191204	17	2019-12-05 03:00:00	0.41	685.2	0.1	0.01	1.4
-35	147.5	20191204	18	2019-12-05 04:00:00	0.43	662.8	0.09	0.01	1.4
-35	147.5	20191204	19	2019-12-05 05:00:00	0.45	641.8	0.09	0.01	1.4
-35	147.5	20191204	20	2019-12-05 06:00:00	0.44	630.79	0.09	0.01	1.4
-35	147.5	20191204	21	2019-12-05 07:00:00	0.27	625.03	0.08	0.01	1.4
-35	147.5	20191204	22	2019-12-05 08:00:00	0.17	609.36	0.08	0.01	1.4
-35	147.5	20191204	23	2019-12-05 09:00:00	0.12	580.46	0.06	0.01	1.4
-35	147.5	20191205	0	2019-12-05 10:00:00	0.19	725.52	0.07	0.01	1.4
-35	147.5	20191205	1	2019-12-05 11:00:00	0.18	728.33	0.07	0.01	1.41
-35	147.5	20191205	2	2019-12-05 12:00:00	0.15	701.99	0.07	0.01	1.42
-35	147.5	20191205	3	2019-12-05 13:00:00	0.19	847.76	0.09	0.01	1.44
-35	147.5	20191205	4	2019-12-05 14:00:00	0.18	894.58	0.1	0.01	1.44
-35	147.5	20191205	5	2019-12-05 15:00:00	0.2	917.45	0.09	0.01	1.42
-35	147.5	20191205	6	2019-12-05 16:00:00	0.23	931.27	0.1	0.01	1.42
-35	147.5	20191205	7	2019-12-05 17:00:00	0.25	935.61	0.11	0.01	1.44
-35	147.5	20191205	8	2019-12-05 18:00:00	0.25	912.73	0.11	0.01	1.44
-35	147.5	20191205	9	2019-12-05 19:00:00	0.26	865.89	0.12	0.01	1.46
-35	147.5	20191205	10	2019-12-05 20:00:00	0.27	808.28	0.12	0.01	1.47
-35	147.5	20191205	11	2019-12-05 21:00:00	0.28	740.45	0.1	0.01	1.45
-35	147.5	20191205	12	2019-12-05 22:00:00	0.28	668.74	0.09	0.01	1.44
-35	147.5	20191205	13	2019-12-05 23:00:00	0.27	601.53	0.08	0.01	1.44
-35	147.5	20191205	14	2019-12-06 00:00:00	0.24	551.32	0.07	0.01	1.43
-35	147.5	20191205	15	2019-12-06 01:00:00	0.21	525.91	0.07	0.01	1.42
-35	147.5	20191205	16	2019-12-06 02:00:00	0.19	520.98	0.06	0.01	1.42
-35	147.5	20191205	17	2019-12-06 03:00:00	0.19	519.42	0.07	0.01	1.45
-35	147.5	20191205	18	2019-12-06 04:00:00	0.21	511.28	0.1	0.01	1.53
-35	147.5	20191205	19	2019-12-06 05:00:00	0.22	498.63	0.11	0.01	1.56
-35	147.5	20191205	20	2019-12-06 06:00:00	0.23	493.65	0.12	0.01	1.58
-35	147.5	20191205	21	2019-12-06 07:00:00	0.17	492.61	0.12	0.01	1.59
-35	147.5	20191205	22	2019-12-06 08:00:00	0.1	482.12	0.1	0.01	1.55
-35	147.5	20191205	23	2019-12-06 09:00:00	0.08	465.67	0.08	0.01	1.5
-35	147.5	20191206	0	2019-12-06 10:00:00	0.18	598.21	0.08	0.01	1.45
-35	147.5	20191206	1	2019-12-06 11:00:00	0.22	695.36	0.08	0.01	1.41
-35	147.5	20191206	2	2019-12-06 12:00:00	0.26	783.03	0.09	0.01	1.4
-35	147.5	20191206	3	2019-12-06 13:00:00	0.28	829.49	0.09	0.01	1.4
-35	147.5	20191206	4	2019-12-06 14:00:00	0.28	820.79	0.1	0.01	1.4
-35	147.5	20191206	5	2019-12-06 15:00:00	0.27	830.4	0.1	0.01	1.41
-35	147.5	20191206	6	2019-12-06 16:00:00	0.26	905.68	0.11	0.01	1.41
-35	147.5	20191206	7	2019-12-06 17:00:00	0.23	827.64	0.1	0.01	1.41
-35	147.5	20191206	8	2019-12-06 18:00:00	0.21	769.21	0.1	0.01	1.4
-35	147.5	20191206	9	2019-12-06 19:00:00	0.21	766.59	0.1	0.01	1.41
-35	147.5	20191206	10	2019-12-06 20:00:00	0.23	798.4	0.11	0.01	1.41
-35	147.5	20191206	11	2019-12-06 21:00:00	0.26	849.78	0.11	0.01	1.41
-35	147.5	20191206	12	2019-12-06 22:00:00	0.29	871.31	0.12	0.01	1.41
-35	147.5	20191206	13	2019-12-06 23:00:00	0.31	858.05	0.12	0.01	1.41
-35	147.5	20191206	14	2019-12-07 00:00:00	0.33	817.15	0.12	0.01	1.42
-35	147.5	20191206	15	2019-12-07 01:00:00	0.34	750.22	0.12	0.01	1.42
-35	147.5	20191206	16	2019-12-07 02:00:00	0.34	669.24	0.1	0.01	1.41
-35	147.5	20191206	17	2019-12-07 03:00:00	0.32	606.71	0.09	0.01	1.41
-35	147.5	20191206	18	2019-12-07 04:00:00	0.3	554.69	0.08	0.01	1.41
-35	147.5	20191206	19	2019-12-07 05:00:00	0.28	513.26	0.08	0	1.41
-35	147.5	20191206	20	2019-12-07 06:00:00	0.21	500.53	0.07	0	1.41
-35	147.5	20191206	21	2019-12-07 07:00:00	0.1	498.05	0.07	0	1.42
-35	147.5	20191206	22	2019-12-07 08:00:00	0.07	510.39	0.06	0.01	1.43
-35	147.5	20191206	23	2019-12-07 09:00:00	0.06	534.78	0.06	0.01	1.45
-35	147.5	20191207	0	2019-12-07 10:00:00	0.03	516.17	0.06	0.01	1.46
-35	147.5	20191207	1	2019-12-07 11:00:00	0.03	557.11	0.06	0.01	1.45
-35	147.5	20191207	2	2019-12-07 12:00:00	0.04	605.9	0.07	0.01	1.46
-35	147.5	20191207	3	2019-12-07 13:00:00	0.06	669.8	0.08	0.01	1.47
-35	147.5	20191207	4	2019-12-07 14:00:00	0.06	656.43	0.08	0.01	1.45
-35	147.5	20191207	5	2019-12-07 15:00:00	0.07	642.53	0.07	0.01	1.41
-35	147.5	20191207	6	2019-12-07 16:00:00	0.08	653.13	0.07	0.01	1.41
-35	147.5	20191207	7	2019-12-07 17:00:00	0.09	655.41	0.06	0.01	1.4
-35	147.5	20191207	8	2019-12-07 18:00:00	0.1	651.66	0.06	0.01	1.4
-35	147.5	20191207	9	2019-12-07 19:00:00	0.12	649.97	0.06	0.01	1.4
-35	147.5	20191207	10	2019-12-07 20:00:00	0.14	652.15	0.06	0.01	1.4
-35	147.5	20191207	11	2019-12-07 21:00:00	0.15	651.08	0.06	0.01	1.4
-35	147.5	20191207	12	2019-12-07 22:00:00	0.16	658.62	0.06	0.01	1.4
-35	147.5	20191207	13	2019-12-07 23:00:00	0.18	670.34	0.06	0.01	1.4
-35	147.5	20191207	14	2019-12-08 00:00:00	0.19	680.54	0.06	0.01	1.4
-35	147.5	20191207	15	2019-12-08 01:00:00	0.2	702.27	0.06	0.01	1.4
-35	147.5	20191207	16	2019-12-08 02:00:00	0.21	725.38	0.07	0.01	1.4
-35	147.5	20191207	17	2019-12-08 03:00:00	0.21	736.34	0.07	0.01	1.4
-35	147.5	20191207	18	2019-12-08 04:00:00	0.22	743.34	0.07	0.01	1.4
-35	147.5	20191207	19	2019-12-08 05:00:00	0.24	759.1	0.07	0.01	1.4
-35	147.5	20191207	20	2019-12-08 06:00:00	0.27	778.28	0.07	0.01	1.4
-35	147.5	20191207	21	2019-12-08 07:00:00	0.22	786.71	0.07	0.01	1.41
-35	147.5	20191207	22	2019-12-08 08:00:00	0.18	788.31	0.07	0.01	1.41
-35	147.5	20191207	23	2019-12-08 09:00:00	0.17	796.71	0.07	0.01	1.41
-35	147.5	20191208	0	2019-12-08 10:00:00	0.49	1862.78	0.16	0.02	1.4
-35	147.5	20191208	1	2019-12-08 11:00:00	0.53	1771.78	0.15	0.02	1.4
-35	147.5	20191208	2	2019-12-08 12:00:00	0.54	1689.65	0.14	0.02	1.4
-35	147.5	20191208	3	2019-12-08 13:00:00	0.7	2382.98	0.19	0.02	1.4
-35	147.5	20191208	4	2019-12-08 14:00:00	0.69	2214.73	0.18	0.02	1.4
-35	147.5	20191208	5	2019-12-08 15:00:00	0.66	2076.25	0.17	0.02	1.4
-35	147.5	20191208	6	2019-12-08 16:00:00	0.62	1963.54	0.16	0.02	1.4
-35	147.5	20191208	7	2019-12-08 17:00:00	0.59	1873.33	0.15	0.02	1.41
-35	147.5	20191208	8	2019-12-08 18:00:00	0.58	1807	0.15	0.02	1.41
-35	147.5	20191208	9	2019-12-08 19:00:00	0.56	1757.68	0.15	0.02	1.42
-35	147.5	20191208	10	2019-12-08 20:00:00	0.54	1718.19	0.15	0.02	1.42
-35	147.5	20191208	11	2019-12-08 21:00:00	0.51	1692.06	0.14	0.02	1.41
-35	147.5	20191208	12	2019-12-08 22:00:00	0.49	1679.33	0.14	0.02	1.42
-35	147.5	20191208	13	2019-12-08 23:00:00	0.5	1684.58	0.15	0.02	1.42
-35	147.5	20191208	14	2019-12-09 00:00:00	0.62	1769.19	0.16	0.02	1.43
-35	147.5	20191208	15	2019-12-09 01:00:00	1.08	2060.9	0.19	0.02	1.42
-35	147.5	20191208	16	2019-12-09 02:00:00	1.77	2429.57	0.24	0.02	1.42
-35	147.5	20191208	17	2019-12-09 03:00:00	2.31	2731.46	0.29	0.03	1.42
-35	147.5	20191208	18	2019-12-09 04:00:00	2.54	3071.45	0.33	0.03	1.42
-35	147.5	20191208	19	2019-12-09 05:00:00	2.61	3500.68	0.39	0.03	1.42
-35	147.5	20191208	20	2019-12-09 06:00:00	2.65	3827.95	0.41	0.04	1.42
-35	147.5	20191208	21	2019-12-09 07:00:00	3.48	3956.98	0.41	0.04	1.41
-35	147.5	20191208	22	2019-12-09 08:00:00	4.09	3979.39	0.38	0.04	1.41
-35	147.5	20191208	23	2019-12-09 09:00:00	3.09	4028.99	0.36	0.04	1.41
-35	147.5	20191209	0	2019-12-09 10:00:00	3.23	8154.29	0.64	0.08	1.4
-35	147.5	20191209	1	2019-12-09 11:00:00	3.1	8226.2	0.65	0.08	1.4
-35	147.5	20191209	2	2019-12-09 12:00:00	2.93	7885.54	0.63	0.07	1.4
-35	147.5	20191209	3	2019-12-09 13:00:00	3.32	9453.21	0.76	0.09	1.4
-35	147.5	20191209	4	2019-12-09 14:00:00	2.93	8659.2	0.7	0.08	1.4
-35	147.5	20191209	5	2019-12-09 15:00:00	2.49	7589.12	0.63	0.07	1.4
-35	147.5	20191209	6	2019-12-09 16:00:00	2.62	13465.5	1.09	0.13	1.4
-35	147.5	20191209	7	2019-12-09 17:00:00	2.98	11423	0.96	0.11	1.4
-35	147.5	20191209	8	2019-12-09 18:00:00	2.81	9397.28	0.81	0.09	1.41
-35	147.5	20191209	9	2019-12-09 19:00:01	2.76	7599.27	0.66	0.07	1.41
-35	147.5	20191209	10	2019-12-09 20:00:01	2.84	6222.8	0.55	0.06	1.41
-35	147.5	20191209	11	2019-12-09 21:00:01	2.97	5252.61	0.46	0.05	1.41
-35	147.5	20191209	12	2019-12-09 22:00:01	3.11	4549.7	0.41	0.04	1.42
-35	147.5	20191209	13	2019-12-09 23:00:01	3.21	3992.76	0.38	0.04	1.42
-35	147.5	20191209	14	2019-12-10 00:00:01	3.25	3495.02	0.34	0.03	1.43
-35	147.5	20191209	15	2019-12-10 01:00:01	3.19	3055.53	0.3	0.03	1.43
-35	147.5	20191209	16	2019-12-10 02:00:01	3	2760.42	0.26	0.03	1.42
-35	147.5	20191209	17	2019-12-10 03:00:01	2.7	2553.09	0.24	0.02	1.42
-35	147.5	20191209	18	2019-12-10 04:00:01	2.41	2320.31	0.23	0.02	1.43
-35	147.5	20191209	19	2019-12-10 05:00:01	2.18	2042.69	0.22	0.02	1.43
-35	147.5	20191209	20	2019-12-10 06:00:01	1.95	1767.04	0.19	0.02	1.43
-35	147.5	20191209	21	2019-12-10 07:00:01	1.53	1531	0.19	0.02	1.43
-35	147.5	20191209	22	2019-12-10 08:00:01	1.3	1343.81	0.2	0.01	1.45
-35	147.5	20191209	23	2019-12-10 09:00:01	0.93	1229.23	0.2	0.01	1.46
-35	147.5	20191210	0	2019-12-10 10:00:01	0.56	1258.08	0.2	0.01	1.46
-35	147.5	20191210	1	2019-12-10 11:00:01	0.46	1281.76	0.2	0.01	1.46
-35	147.5	20191210	2	2019-12-10 12:00:01	0.36	1170.93	0.19	0.01	1.44
-35	147.5	20191210	3	2019-12-10 13:00:01	0.19	687.4	0.15	0.01	1.45
-35	147.5	20191210	4	2019-12-10 14:00:01	0.16	737.4	0.15	0.01	1.45
-35	147.5	20191210	5	2019-12-10 15:00:01	0.19	906.62	0.16	0.01	1.44
-35	147.5	20191210	6	2019-12-10 16:00:01	0.26	1119.99	0.16	0.01	1.42
-35	147.5	20191210	7	2019-12-10 17:00:01	0.34	1278.89	0.16	0.01	1.41
-35	147.5	20191210	8	2019-12-10 18:00:01	0.39	1306.68	0.15	0.01	1.41
-35	147.5	20191210	9	2019-12-10 19:00:01	0.39	1210.44	0.12	0.01	1.41
-35	147.5	20191210	10	2019-12-10 20:00:01	0.36	1067.68	0.11	0.01	1.4
-35	147.5	20191210	11	2019-12-10 21:00:01	0.3	940.79	0.09	0.01	1.41
-35	147.5	20191210	12	2019-12-10 22:00:01	0.26	852.85	0.09	0.01	1.41
-35	147.5	20191210	13	2019-12-10 23:00:01	0.25	794.85	0.08	0.01	1.41
-35	147.5	20191210	14	2019-12-11 00:00:01	0.26	756.96	0.08	0.01	1.41
-35	147.5	20191210	15	2019-12-11 01:00:01	0.29	734.84	0.08	0.01	1.41
-35	147.5	20191210	16	2019-12-11 02:00:01	0.33	733.63	0.07	0.01	1.41
-35	147.5	20191210	17	2019-12-11 03:00:01	0.38	754.23	0.08	0.01	1.41
-35	147.5	20191210	18	2019-12-11 04:00:01	0.45	798.34	0.08	0.01	1.4
-35	147.5	20191210	19	2019-12-11 05:00:01	0.55	850.04	0.1	0.01	1.4
-35	147.5	20191210	20	2019-12-11 06:00:01	0.7	868.54	0.11	0.01	1.4
-35	147.5	20191210	21	2019-12-11 07:00:01	0.67	855.02	0.11	0.01	1.4
-35	147.5	20191210	22	2019-12-11 08:00:01	0.47	820.3	0.1	0.01	1.4
-35	147.5	20191210	23	2019-12-11 09:00:01	0.37	772.94	0.09	0.01	1.41
-35	147.5	20191211	0	2019-12-11 10:00:01	0.43	1271.39	0.12	0.01	1.4
-35	147.5	20191211	1	2019-12-11 11:00:01	0.4	1271.37	0.12	0.01	1.4
-35	147.5	20191211	2	2019-12-11 12:00:01	0.39	1238.91	0.11	0.01	1.41
-35	147.5	20191211	3	2019-12-11 13:00:01	0.53	2084.56	0.18	0.02	1.41
-35	147.5	20191211	4	2019-12-11 14:00:01	0.59	1939.99	0.18	0.02	1.42
-35	147.5	20191211	5	2019-12-11 15:00:01	0.58	1729.83	0.16	0.02	1.42
-35	147.5	20191211	6	2019-12-11 16:00:01	0.5	1339.28	0.14	0.01	1.43
-35	147.5	20191211	7	2019-12-11 17:00:01	0.4	1113.43	0.12	0.01	1.43
-35	147.5	20191211	8	2019-12-11 18:00:01	0.28	864.89	0.1	0.01	1.43
-35	147.5	20191211	9	2019-12-11 19:00:01	0.2	683.95	0.08	0.01	1.42
-35	147.5	20191211	10	2019-12-11 20:00:01	0.16	593.19	0.07	0.01	1.42
-35	147.5	20191211	11	2019-12-11 21:00:01	0.15	577.78	0.07	0.01	1.41
-35	147.5	20191211	12	2019-12-11 22:00:01	0.16	590.62	0.07	0.01	1.41
-35	147.5	20191211	13	2019-12-11 23:00:01	0.19	619.44	0.07	0.01	1.41
-35	147.5	20191211	14	2019-12-12 00:00:01	0.23	660.31	0.08	0.01	1.41
-35	147.5	20191211	15	2019-12-12 01:00:01	0.26	716.53	0.09	0.01	1.41
-35	147.5	20191211	16	2019-12-12 02:00:01	0.3	794.45	0.09	0.01	1.41
-35	147.5	20191211	17	2019-12-12 03:00:01	0.34	894.94	0.1	0.01	1.41
-35	147.5	20191211	18	2019-12-12 04:00:01	0.39	1030.85	0.12	0.01	1.41
-35	147.5	20191211	19	2019-12-12 05:00:01	0.44	1185.01	0.15	0.01	1.42
-35	147.5	20191211	20	2019-12-12 06:00:01	0.51	1308.27	0.17	0.01	1.43
-35	147.5	20191211	21	2019-12-12 07:00:01	0.68	1383.41	0.17	0.01	1.42
-35	147.5	20191211	22	2019-12-12 08:00:01	0.71	1401	0.17	0.01	1.41
-35	147.5	20191211	23	2019-12-12 09:00:01	0.63	1363.77	0.15	0.01	1.41
-35	147.5	20191212	0	2019-12-12 10:00:01	0.63	2155.14	0.22	0.02	1.4
-35	147.5	20191212	1	2019-12-12 11:00:01	0.56	1797.15	0.18	0.02	1.4
-35	147.5	20191212	2	2019-12-12 12:00:01	0.42	1366.81	0.14	0.01	1.41
-35	147.5	20191212	3	2019-12-12 13:00:01	0.33	1246.37	0.13	0.01	1.4
-35	147.5	20191212	4	2019-12-12 14:00:01	0.24	957.87	0.1	0.01	1.4
-35	147.5	20191212	5	2019-12-12 15:00:01	0.2	816.16	0.08	0.01	1.4
-35	147.5	20191212	6	2019-12-12 16:00:01	0.18	732.87	0.07	0.01	1.4
-35	147.5	20191212	7	2019-12-12 17:00:01	0.16	663.5	0.06	0.01	1.4
-35	147.5	20191212	8	2019-12-12 18:00:01	0.16	617.75	0.06	0.01	1.4
-35	147.5	20191212	9	2019-12-12 19:00:01	0.16	593.23	0.06	0.01	1.4
-35	147.5	20191212	10	2019-12-12 20:00:01	0.16	581.04	0.06	0.01	1.4
-35	147.5	20191212	11	2019-12-12 21:00:01	0.17	578.12	0.06	0.01	1.4
-35	147.5	20191212	12	2019-12-12 22:00:01	0.18	570.36	0.07	0.01	1.42
-35	147.5	20191212	13	2019-12-12 23:00:01	0.19	554.55	0.08	0.01	1.45
-35	147.5	20191212	14	2019-12-13 00:00:01	0.19	538.77	0.08	0.01	1.46
-35	147.5	20191212	15	2019-12-13 01:00:01	0.2	525.04	0.08	0.01	1.47
-35	147.5	20191212	16	2019-12-13 02:00:01	0.21	514.23	0.08	0.01	1.48
-35	147.5	20191212	17	2019-12-13 03:00:01	0.21	526.6	0.09	0.01	1.48
-35	147.5	20191212	18	2019-12-13 04:00:01	0.22	552.51	0.08	0.01	1.45
-35	147.5	20191212	19	2019-12-13 05:00:01	0.22	566.48	0.09	0.01	1.46
-35	147.5	20191212	20	2019-12-13 06:00:01	0.25	569.02	0.09	0.01	1.47
-35	147.5	20191212	21	2019-12-13 07:00:01	0.25	551.93	0.09	0.01	1.47
-35	147.5	20191212	22	2019-12-13 08:00:01	0.23	518.26	0.08	0.01	1.46
-35	147.5	20191212	23	2019-12-13 09:00:01	0.2	503.87	0.08	0.01	1.47
-35	147.5	20191213	0	2019-12-13 10:00:01	0.23	1019.25	0.14	0.01	1.44
-35	147.5	20191213	1	2019-12-13 11:00:01	0.24	938.14	0.13	0.01	1.44
-35	147.5	20191213	2	2019-12-13 12:00:01	0.23	810.77	0.11	0.01	1.45
-35	147.5	20191213	3	2019-12-13 13:00:01	0.19	670.72	0.1	0.01	1.47
-35	147.5	20191213	4	2019-12-13 14:00:01	0.15	542.65	0.09	0.01	1.49
-35	147.5	20191213	5	2019-12-13 15:00:01	0.11	446.33	0.08	0.01	1.52
-35	147.5	20191213	6	2019-12-13 16:00:01	0.1	400.33	0.08	0.01	1.55
-35	147.5	20191213	7	2019-12-13 17:00:01	0.1	376.07	0.09	0	1.57
-35	147.5	20191213	8	2019-12-13 18:00:01	0.1	356.29	0.08	0	1.54
-35	147.5	20191213	9	2019-12-13 19:00:01	0.1	359.05	0.07	0	1.52
-35	147.5	20191213	10	2019-12-13 20:00:01	0.11	392.19	0.07	0	1.51
-35	147.5	20191213	11	2019-12-13 21:00:01	0.13	499.22	0.09	0.01	1.48
-35	147.5	20191213	12	2019-12-13 22:00:01	0.14	595.36	0.1	0.01	1.46
-35	147.5	20191213	13	2019-12-13 23:00:01	0.16	581.14	0.09	0.01	1.44
-35	147.5	20191213	14	2019-12-14 00:00:01	0.19	495.96	0.07	0.01	1.44
-35	147.5	20191213	15	2019-12-14 01:00:01	0.2	425.68	0.06	0	1.45
-35	147.5	20191213	16	2019-12-14 02:00:01	0.21	402.81	0.06	0	1.45
-35	147.5	20191213	17	2019-12-14 03:00:01	0.21	393.4	0.05	0	1.44
-35	147.5	20191213	18	2019-12-14 04:00:01	0.21	382.85	0.05	0	1.44
-35	147.5	20191213	19	2019-12-14 05:00:01	0.2	369.97	0.06	0	1.47
-35	147.5	20191213	20	2019-12-14 06:00:01	0.13	359.79	0.06	0	1.46
-35	147.5	20191213	21	2019-12-14 07:00:01	0.07	354.14	0.06	0	1.47
-35	147.5	20191213	22	2019-12-14 08:00:01	0.05	354.41	0.05	0	1.45
-35	147.5	20191213	23	2019-12-14 09:00:01	0.05	365.72	0.06	0	1.45
-35	147.5	20191214	0	2019-12-14 10:00:01	0.04	350.21	0.05	0	1.44
-35	147.5	20191214	1	2019-12-14 11:00:01	0.04	347.38	0.06	0	1.49
-35	147.5	20191214	2	2019-12-14 12:00:01	0.04	328.44	0.06	0	1.51
-35	147.5	20191214	3	2019-12-14 13:00:01	0.11	607.39	0.09	0.01	1.46
-35	147.5	20191214	4	2019-12-14 14:00:01	0.13	579.98	0.08	0.01	1.46
-35	147.5	20191214	5	2019-12-14 15:00:01	0.13	548.51	0.08	0.01	1.48
-35	147.5	20191214	6	2019-12-14 16:00:01	0.13	551.09	0.08	0.01	1.48
-35	147.5	20191214	7	2019-12-14 17:00:01	0.13	559.28	0.08	0.01	1.47
-35	147.5	20191214	8	2019-12-14 18:00:01	0.14	548.5	0.07	0.01	1.44
-35	147.5	20191214	9	2019-12-14 19:00:01	0.15	536.41	0.06	0.01	1.42
-35	147.5	20191214	10	2019-12-14 20:00:01	0.16	510.42	0.06	0	1.42
-35	147.5	20191214	11	2019-12-14 21:00:01	0.17	495.26	0.07	0.01	1.45
-35	147.5	20191214	12	2019-12-14 22:00:01	0.18	486.93	0.07	0.01	1.47
-35	147.5	20191214	13	2019-12-14 23:00:01	0.19	476.48	0.07	0.01	1.48
-35	147.5	20191214	14	2019-12-15 00:00:01	0.21	488.52	0.07	0.01	1.47
-35	147.5	20191214	15	2019-12-15 01:00:01	0.23	504.49	0.07	0.01	1.46
-35	147.5	20191214	16	2019-12-15 02:00:01	0.25	510.15	0.07	0.01	1.45
-35	147.5	20191214	17	2019-12-15 03:00:01	0.27	500.09	0.07	0.01	1.45
-35	147.5	20191214	18	2019-12-15 04:00:01	0.3	497.14	0.07	0.01	1.45
-35	147.5	20191214	19	2019-12-15 05:00:01	0.32	490.07	0.06	0	1.43
-35	147.5	20191214	20	2019-12-15 06:00:01	0.32	460.02	0.06	0	1.43
-35	147.5	20191214	21	2019-12-15 07:00:01	0.16	432.81	0.06	0	1.44
-35	147.5	20191214	22	2019-12-15 08:00:01	0.13	419.73	0.06	0	1.44
-35	147.5	20191214	23	2019-12-15 09:00:01	0.11	421.32	0.06	0	1.44
-35	147.5	20191215	0	2019-12-15 10:00:01	0.1	417.94	0.06	0	1.46
-35	147.5	20191215	1	2019-12-15 11:00:01	0.09	394.51	0.06	0	1.48
-35	147.5	20191215	2	2019-12-15 12:00:01	0.09	377.28	0.06	0	1.47
-35	147.5	20191215	3	2019-12-15 13:00:01	0.09	367.48	0.06	0	1.49
-35	147.5	20191215	4	2019-12-15 14:00:01	0.08	363.23	0.06	0	1.48
-35	147.5	20191215	5	2019-12-15 15:00:01	0.08	380.98	0.07	0	1.5
-35	147.5	20191215	6	2019-12-15 16:00:01	0.09	409.19	0.08	0	1.53
-35	147.5	20191215	7	2019-12-15 17:00:01	0.1	413.57	0.07	0	1.5
-35	147.5	20191215	8	2019-12-15 18:00:01	0.11	414.06	0.06	0	1.45
-35	147.5	20191215	9	2019-12-15 19:00:01	0.13	416.43	0.05	0	1.44
-35	147.5	20191215	10	2019-12-15 20:00:01	0.14	426.91	0.06	0	1.45
-35	147.5	20191215	11	2019-12-15 21:00:01	0.16	443.79	0.06	0	1.45
-35	147.5	20191215	12	2019-12-15 22:00:01	0.18	451.77	0.06	0	1.45
-35	147.5	20191215	13	2019-12-15 23:00:01	0.19	447.08	0.06	0	1.45
-35	147.5	20191215	14	2019-12-16 00:00:01	0.2	436.16	0.06	0	1.45
-35	147.5	20191215	15	2019-12-16 01:00:01	0.22	425.79	0.06	0	1.45
-35	147.5	20191215	16	2019-12-16 02:00:01	0.22	415.12	0.05	0	1.44
-35	147.5	20191215	17	2019-12-16 03:00:01	0.23	405.66	0.05	0	1.43
-35	147.5	20191215	18	2019-12-16 04:00:01	0.25	406.67	0.05	0	1.43
-35	147.5	20191215	19	2019-12-16 05:00:01	0.25	407.53	0.05	0	1.42
-35	147.5	20191215	20	2019-12-16 06:00:01	0.24	394.92	0.04	0	1.42
-35	147.5	20191215	21	2019-12-16 07:00:01	0.13	380.3	0.04	0	1.41
-35	147.5	20191215	22	2019-12-16 08:00:01	0.1	370.24	0.04	0	1.41
-35	147.5	20191215	23	2019-12-16 09:00:01	0.09	360.71	0.04	0	1.41
-35	147.5	20191216	0	2019-12-16 10:00:01	0.07	338.19	0.04	0	1.42
-35	147.5	20191216	1	2019-12-16 11:00:01	0.06	324.81	0.04	0	1.43
-35	147.5	20191216	2	2019-12-16 12:00:01	0.06	323.66	0.04	0	1.44
-35	147.5	20191216	3	2019-12-16 13:00:01	0.13	543.92	0.05	0.01	1.42
-35	147.5	20191216	4	2019-12-16 14:00:01	0.14	564.8	0.05	0.01	1.41
-35	147.5	20191216	5	2019-12-16 15:00:01	0.14	579.79	0.05	0.01	1.41
-35	147.5	20191216	6	2019-12-16 16:00:01	0.12	590.53	0.05	0.01	1.41
-35	147.5	20191216	7	2019-12-16 17:00:01	0.11	628.42	0.05	0.01	1.41
-35	147.5	20191216	8	2019-12-16 18:00:01	0.11	699.65	0.06	0.01	1.42
-35	147.5	20191216	9	2019-12-16 19:00:01	0.11	844.95	0.08	0.01	1.44
-35	147.5	20191216	10	2019-12-16 20:00:01	0.12	994.62	0.09	0.01	1.44
-35	147.5	20191216	11	2019-12-16 21:00:01	0.13	1033.43	0.09	0.01	1.44
-35	147.5	20191216	12	2019-12-16 22:00:01	0.17	1000.92	0.09	0.01	1.44
-35	147.5	20191216	13	2019-12-16 23:00:01	0.31	1041.15	0.1	0.01	1.43
-35	147.5	20191216	14	2019-12-17 00:00:01	0.71	1307.28	0.12	0.01	1.42
-35	147.5	20191216	15	2019-12-17 01:00:01	1.23	1643.17	0.16	0.02	1.41
-35	147.5	20191216	16	2019-12-17 02:00:01	1.54	1858.75	0.18	0.02	1.41
-35	147.5	20191216	17	2019-12-17 03:00:01	1.53	2064.83	0.19	0.02	1.41
-35	147.5	20191216	18	2019-12-17 04:00:01	1.41	2450.89	0.22	0.02	1.41
-35	147.5	20191216	19	2019-12-17 05:00:01	1.35	3169.6	0.28	0.03	1.4
-35	147.5	20191216	20	2019-12-17 06:00:01	2.26	4133.44	0.37	0.04	1.4
-35	147.5	20191216	21	2019-12-17 07:00:01	3.79	4981.08	0.44	0.05	1.41
-35	147.5	20191216	22	2019-12-17 08:00:01	4.02	5470.91	0.47	0.05	1.41
-35	147.5	20191216	23	2019-12-17 09:00:01	3.65	5545.6	0.46	0.05	1.41
-35	147.5	20191217	0	2019-12-17 10:00:01	4.4	9943.54	0.78	0.09	1.4
-35	147.5	20191217	1	2019-12-17 11:00:01	3.78	9559.72	0.72	0.09	1.4
-35	147.5	20191217	2	2019-12-17 12:00:01	3.05	8855.06	0.64	0.08	1.4
-35	147.5	20191217	3	2019-12-17 13:00:01	4.19	12036.3	0.88	0.11	1.4
-35	147.5	20191217	4	2019-12-17 14:00:01	3.7	10811	0.76	0.1	1.4
-35	147.5	20191217	5	2019-12-17 15:00:01	3.17	9634.14	0.67	0.09	1.4
-35	147.5	20191217	6	2019-12-17 16:00:01	2.66	8542.95	0.59	0.08	1.41
-35	147.5	20191217	7	2019-12-17 17:00:01	2.26	7587.79	0.53	0.07	1.41
-35	147.5	20191217	8	2019-12-17 18:00:01	2.03	6831.95	0.48	0.06	1.41
-35	147.5	20191217	9	2019-12-17 19:00:01	1.88	6292.05	0.44	0.06	1.41
-35	147.5	20191217	10	2019-12-17 20:00:01	1.75	5992.14	0.42	0.06	1.4
-35	147.5	20191217	11	2019-12-17 21:00:01	1.61	5854.55	0.42	0.05	1.4
-35	147.5	20191217	12	2019-12-17 22:00:01	1.48	5860.49	0.42	0.05	1.41
-35	147.5	20191217	13	2019-12-17 23:00:01	1.71	6345.07	0.47	0.06	1.41
-35	147.5	20191217	14	2019-12-18 00:00:01	3.05	7796.17	0.59	0.07	1.41
-35	147.5	20191217	15	2019-12-18 01:00:01	5.54	9640.25	0.75	0.09	1.41
-35	147.5	20191217	16	2019-12-18 02:00:01	7.24	10809.6	0.85	0.1	1.4
-35	147.5	20191217	17	2019-12-18 03:00:02	7.71	11401.9	0.89	0.11	1.4
-35	147.5	20191217	18	2019-12-18 04:00:02	7.85	11726.5	0.92	0.11	1.4
-35	147.5	20191217	19	2019-12-18 05:00:02	7.95	11793.1	0.93	0.11	1.4
-35	147.5	20191217	20	2019-12-18 06:00:02	7.66	11577.4	0.92	0.11	1.4
-35	147.5	20191217	21	2019-12-18 07:00:02	6.57	11317.5	0.89	0.11	1.4
-35	147.5	20191217	22	2019-12-18 08:00:02	6.01	11366.2	0.89	0.11	1.4
-35	147.5	20191217	23	2019-12-18 09:00:02	5.91	11478	0.9	0.11	1.4
-35	147.5	20191218	0	2019-12-18 10:00:02	3.3	8362.89	0.65	0.08	1.4
-35	147.5	20191218	1	2019-12-18 11:00:02	2.52	8050.3	0.62	0.08	1.4
-35	147.5	20191218	2	2019-12-18 12:00:02	2.16	7759.63	0.59	0.07	1.4
-35	147.5	20191218	3	2019-12-18 13:00:02	2.81	10353.7	0.77	0.1	1.4
-35	147.5	20191218	4	2019-12-18 14:00:02	2.68	10154.1	0.74	0.09	1.4
-35	147.5	20191218	5	2019-12-18 15:00:02	2.59	9965.36	0.72	0.09	1.4
-35	147.5	20191218	6	2019-12-18 16:00:02	2.58	9913.44	0.71	0.09	1.4
-35	147.5	20191218	7	2019-12-18 17:00:02	2.63	9812.96	0.7	0.09	1.4
-35	147.5	20191218	8	2019-12-18 18:00:02	2.67	9697.61	0.69	0.09	1.4
-35	147.5	20191218	9	2019-12-18 19:00:02	2.67	9541.25	0.68	0.09	1.4
-35	147.5	20191218	10	2019-12-18 20:00:02	2.63	9362.6	0.67	0.09	1.4
-35	147.5	20191218	11	2019-12-18 21:00:02	2.53	9143.07	0.66	0.09	1.4
-35	147.5	20191218	12	2019-12-18 22:00:02	2.39	8860.22	0.65	0.08	1.4
-35	147.5	20191218	13	2019-12-18 23:00:02	2.23	8491.69	0.64	0.08	1.4
-35	147.5	20191218	14	2019-12-19 00:00:02	2.09	8082.63	0.62	0.08	1.4
-35	147.5	20191218	15	2019-12-19 01:00:02	1.99	7702.82	0.6	0.07	1.4
-35	147.5	20191218	16	2019-12-19 02:00:02	1.95	7455.16	0.59	0.07	1.4
-35	147.5	20191218	17	2019-12-19 03:00:02	1.98	7420.53	0.59	0.07	1.41
-35	147.5	20191218	18	2019-12-19 04:00:02	2.04	7578.17	0.6	0.07	1.4
-35	147.5	20191218	19	2019-12-19 05:00:02	2.1	7810.13	0.62	0.07	1.4
-35	147.5	20191218	20	2019-12-19 06:00:02	2.1	8036.09	0.65	0.08	1.41
-35	147.5	20191218	21	2019-12-19 07:00:02	1.98	8150.68	0.67	0.08	1.41
-35	147.5	20191218	22	2019-12-19 08:00:02	2.05	8069.41	0.68	0.08	1.41
-35	147.5	20191218	23	2019-12-19 09:00:02	2.31	7743.14	0.66	0.07	1.41
-35	147.5	20191219	0	2019-12-19 10:00:02	3.04	11347.1	1.06	0.11	1.42
-35	147.5	20191219	1	2019-12-19 11:00:02	3.16	11514.8	1.02	0.11	1.41
-35	147.5	20191219	2	2019-12-19 12:00:02	3.28	11161.1	0.94	0.11	1.41
-35	147.5	20191219	3	2019-12-19 13:00:02	2.95	9385.9	0.77	0.09	1.41
-35	147.5	20191219	4	2019-12-19 14:00:02	2.8	8368.9	0.67	0.08	1.4
-35	147.5	20191219	5	2019-12-19 15:00:02	2.33	6875.1	0.54	0.06	1.4
-35	147.5	20191219	6	2019-12-19 16:00:02	1.69	5122.38	0.41	0.05	1.4
-35	147.5	20191219	7	2019-12-19 17:00:02	1.17	3611.72	0.29	0.03	1.41
-35	147.5	20191219	8	2019-12-19 18:00:02	0.84	2485.76	0.2	0.02	1.41
-35	147.5	20191219	9	2019-12-19 19:00:02	0.57	1671.42	0.14	0.02	1.41
-35	147.5	20191219	10	2019-12-19 20:00:02	0.38	1167.76	0.1	0.01	1.41
-35	147.5	20191219	11	2019-12-19 21:00:02	0.3	944.56	0.08	0.01	1.41
-35	147.5	20191219	12	2019-12-19 22:00:02	0.29	871.03	0.08	0.01	1.41
-35	147.5	20191219	13	2019-12-19 23:00:02	0.32	898.83	0.08	0.01	1.41
-35	147.5	20191219	14	2019-12-20 00:00:02	0.7	1130.34	0.1	0.01	1.41
-35	147.5	20191219	15	2019-12-20 01:00:02	2.69	2202.79	0.19	0.02	1.41
-35	147.5	20191219	16	2019-12-20 02:00:02	6.42	3832.43	0.33	0.04	1.41
-35	147.5	20191219	17	2019-12-20 03:00:02	9.15	4365.87	0.38	0.04	1.41
-35	147.5	20191219	18	2019-12-20 04:00:02	9.72	4066.69	0.36	0.04	1.41
-35	147.5	20191219	19	2019-12-20 05:00:02	9.02	3820.53	0.34	0.04	1.41
-35	147.5	20191219	20	2019-12-20 06:00:02	7.61	3695.44	0.32	0.03	1.41
-35	147.5	20191219	21	2019-12-20 07:00:02	6.81	3601.81	0.3	0.03	1.41
-35	147.5	20191219	22	2019-12-20 08:00:02	6	3684.34	0.3	0.03	1.41
-35	147.5	20191219	23	2019-12-20 09:00:02	4.23	3799.03	0.3	0.04	1.4
-35	147.5	20191220	0	2019-12-20 10:00:02	2.63	9047.79	0.73	0.08	1.4
-35	147.5	20191220	1	2019-12-20 11:00:02	2.54	8314.27	0.66	0.08	1.4
-35	147.5	20191220	2	2019-12-20 12:00:02	2.46	7730.3	0.61	0.07	1.4
-35	147.5	20191220	3	2019-12-20 13:00:02	1.93	6086.22	0.48	0.06	1.4
-35	147.5	20191220	4	2019-12-20 14:00:02	1.88	5951.39	0.47	0.06	1.4
-35	147.5	20191220	5	2019-12-20 15:00:02	1.78	5733.48	0.46	0.05	1.4
-35	147.5	20191220	6	2019-12-20 16:00:02	2.97	12029	0.99	0.11	1.4
-35	147.5	20191220	7	2019-12-20 17:00:02	3.01	11861.9	0.98	0.11	1.4
-35	147.5	20191220	8	2019-12-20 18:00:02	2.9	11409.8	0.96	0.11	1.4
-35	147.5	20191220	9	2019-12-20 19:00:02	2.7	10449	0.89	0.1	1.4
-35	147.5	20191220	10	2019-12-20 20:00:02	2.39	8801.69	0.77	0.08	1.4
-35	147.5	20191220	11	2019-12-20 21:00:02	2.07	6708.57	0.61	0.06	1.4
-35	147.5	20191220	12	2019-12-20 22:00:02	1.84	4773.24	0.45	0.04	1.4
-35	147.5	20191220	13	2019-12-20 23:00:02	1.77	3682.36	0.35	0.03	1.4
-35	147.5	20191220	14	2019-12-21 00:00:02	1.91	3482.37	0.33	0.03	1.4
-35	147.5	20191220	15	2019-12-21 01:00:02	2.14	3887.76	0.36	0.04	1.4
-35	147.5	20191220	16	2019-12-21 02:00:02	2.28	4729.4	0.45	0.04	1.41
-35	147.5	20191220	17	2019-12-21 03:00:02	2.25	5511.9	0.57	0.05	1.42
-35	147.5	20191220	18	2019-12-21 04:00:02	2.05	5610.26	0.6	0.05	1.42
-35	147.5	20191220	19	2019-12-21 05:00:02	1.79	5203.89	0.55	0.05	1.42
-35	147.5	20191220	20	2019-12-21 06:00:02	1.56	4832.09	0.54	0.05	1.42
-35	147.5	20191220	21	2019-12-21 07:00:02	1.31	4690.51	0.53	0.05	1.42
-35	147.5	20191220	22	2019-12-21 08:00:02	1.23	4748.77	0.55	0.05	1.42
-35	147.5	20191220	23	2019-12-21 09:00:02	1.29	4862.61	0.58	0.05	1.42
-35	147.5	20191221	0	2019-12-21 10:00:02	1.44	5209.99	0.62	0.05	1.42
-35	147.5	20191221	1	2019-12-21 11:00:02	1.38	4451.18	0.58	0.04	1.42
-35	147.5	20191221	2	2019-12-21 12:00:02	1.14	3452.47	0.49	0.03	1.42
-35	147.5	20191221	3	2019-12-21 13:00:02	1.64	6111.58	0.74	0.06	1.42
-35	147.5	20191221	4	2019-12-21 14:00:02	1.4	4820.84	0.6	0.05	1.43
-35	147.5	20191221	5	2019-12-21 15:00:02	0.97	3233.59	0.38	0.03	1.42
-35	147.5	20191221	6	2019-12-21 16:00:02	0.58	2331.58	0.27	0.02	1.43
-35	147.5	20191221	7	2019-12-21 17:00:02	0.36	1838.96	0.22	0.02	1.44
-35	147.5	20191221	8	2019-12-21 18:00:02	0.28	1390.79	0.18	0.01	1.46
-35	147.5	20191221	9	2019-12-21 19:00:02	0.26	1109.26	0.15	0.01	1.48
-35	147.5	20191221	10	2019-12-21 20:00:02	0.26	1015.42	0.16	0.01	1.51
-35	147.5	20191221	11	2019-12-21 21:00:02	0.25	952.13	0.16	0.01	1.52
-35	147.5	20191221	12	2019-12-21 22:00:02	0.22	867.09	0.15	0.01	1.52
-35	147.5	20191221	13	2019-12-21 23:00:02	0.19	927.15	0.15	0.01	1.52
-35	147.5	20191221	14	2019-12-22 00:00:02	0.19	1259.62	0.17	0.01	1.49
-35	147.5	20191221	15	2019-12-22 01:00:02	0.21	1631.89	0.16	0.02	1.44
-35	147.5	20191221	16	2019-12-22 02:00:02	0.24	1904.14	0.17	0.02	1.42
-35	147.5	20191221	17	2019-12-22 03:00:02	0.28	2327.53	0.22	0.02	1.42
-35	147.5	20191221	18	2019-12-22 04:00:02	0.43	2853.5	0.28	0.03	1.42
-35	147.5	20191221	19	2019-12-22 05:00:02	0.98	3533.02	0.37	0.03	1.42
-35	147.5	20191221	20	2019-12-22 06:00:02	2.37	4090.57	0.43	0.04	1.41
-35	147.5	20191221	21	2019-12-22 07:00:02	3.79	4353.19	0.46	0.04	1.41
-35	147.5	20191221	22	2019-12-22 08:00:02	3.78	4272.64	0.45	0.04	1.41
-35	147.5	20191221	23	2019-12-22 09:00:02	3.11	4041.46	0.41	0.04	1.41
-35	147.5	20191222	0	2019-12-22 10:00:02	1.86	11894.5	0.95	0.11	1.4
-35	147.5	20191222	1	2019-12-22 11:00:02	1.91	9927.63	0.8	0.09	1.4
-35	147.5	20191222	2	2019-12-22 12:00:02	1.94	7894.1	0.65	0.07	1.4
-35	147.5	20191222	3	2019-12-22 13:00:02	1.99	6695.62	0.57	0.06	1.41
-35	147.5	20191222	4	2019-12-22 14:00:02	2.03	6087.39	0.53	0.06	1.41
-35	147.5	20191222	5	2019-12-22 15:00:02	2.05	5742.17	0.51	0.05	1.41
-35	147.5	20191222	6	2019-12-22 16:00:02	2.29	10858.4	0.91	0.1	1.41
-35	147.5	20191222	7	2019-12-22 17:00:02	2.23	10259.7	0.85	0.1	1.4
-35	147.5	20191222	8	2019-12-22 18:00:02	2.98	10170.5	0.84	0.09	1.4
-35	147.5	20191222	9	2019-12-22 19:00:02	5.74	11515.4	0.97	0.11	1.4
-35	147.5	20191222	10	2019-12-22 20:00:02	8.61	12386.6	1.07	0.12	1.4
-35	147.5	20191222	11	2019-12-22 21:00:02	8.28	11313.8	1	0.11	1.4
-35	147.5	20191222	12	2019-12-22 22:00:02	5.8	9369.95	0.83	0.09	1.4
-35	147.5	20191222	13	2019-12-22 23:00:02	4.19	8144.84	0.74	0.08	1.41
-35	147.5	20191222	14	2019-12-23 00:00:02	3.51	7664.18	0.7	0.07	1.41
-35	147.5	20191222	15	2019-12-23 01:00:02	3.08	7384.84	0.67	0.07	1.4
-35	147.5	20191222	16	2019-12-23 02:00:02	2.63	7549.09	0.69	0.07	1.4
-35	147.5	20191222	17	2019-12-23 03:00:02	2.32	8134.7	0.74	0.08	1.4
-35	147.5	20191222	18	2019-12-23 04:00:02	2.13	8932.78	0.83	0.08	1.4
-35	147.5	20191222	19	2019-12-23 05:00:02	1.97	9886.13	0.94	0.09	1.4
-35	147.5	20191222	20	2019-12-23 06:00:02	1.89	10731.4	1.04	0.1	1.4
-35	147.5	20191222	21	2019-12-23 07:00:02	2.28	11209.5	1.11	0.1	1.4
-35	147.5	20191222	22	2019-12-23 08:00:02	3.59	11078.8	1.1	0.1	1.4
-35	147.5	20191222	23	2019-12-23 09:00:02	4.77	10598.5	1.05	0.1	1.4
-35	147.5	20191223	0	2019-12-23 10:00:02	3.72	7620.42	0.75	0.07	1.4
-35	147.5	20191223	1	2019-12-23 11:00:02	3.64	7330.59	0.71	0.07	1.4
-35	147.5	20191223	2	2019-12-23 12:00:02	3.35	6978.57	0.66	0.06	1.4
-35	147.5	20191223	3	2019-12-23 13:00:02	3.91	8930.87	0.81	0.08	1.4
-35	147.5	20191223	4	2019-12-23 14:00:02	3.62	8834.13	0.79	0.08	1.4
-35	147.5	20191223	5	2019-12-23 15:00:02	3.4	8837	0.79	0.08	1.4
-35	147.5	20191223	6	2019-12-23 16:00:02	3.24	8825.14	0.79	0.08	1.4
-35	147.5	20191223	7	2019-12-23 17:00:02	3.13	8797.02	0.79	0.08	1.4
-35	147.5	20191223	8	2019-12-23 18:00:02	3.03	8723.12	0.78	0.08	1.41
-35	147.5	20191223	9	2019-12-23 19:00:02	2.86	8342.64	0.75	0.08	1.41
-35	147.5	20191223	10	2019-12-23 20:00:02	2.63	7758	0.7	0.07	1.41
-35	147.5	20191223	11	2019-12-23 21:00:02	2.38	7234.16	0.65	0.07	1.41
-35	147.5	20191223	12	2019-12-23 22:00:02	2.16	6594.46	0.59	0.06	1.41
-35	147.5	20191223	13	2019-12-23 23:00:02	2.03	6206.31	0.56	0.06	1.42
-35	147.5	20191223	14	2019-12-24 00:00:02	1.99	5583.82	0.5	0.05	1.42
-35	147.5	20191223	15	2019-12-24 01:00:02	2.08	4678.59	0.44	0.04	1.41
-35	147.5	20191223	16	2019-12-24 02:00:02	2.34	4263.29	0.41	0.04	1.41
-35	147.5	20191223	17	2019-12-24 03:00:02	2.79	4097.54	0.41	0.04	1.42
-35	147.5	20191223	18	2019-12-24 04:00:02	3.49	4136.62	0.43	0.04	1.42
-35	147.5	20191223	19	2019-12-24 05:00:02	4.4	4451.43	0.48	0.04	1.42
-35	147.5	20191223	20	2019-12-24 06:00:02	5.14	4978.67	0.52	0.05	1.42
-35	147.5	20191223	21	2019-12-24 07:00:02	5.25	5660.24	0.57	0.05	1.41
-35	147.5	20191223	22	2019-12-24 08:00:02	4.59	6323.64	0.61	0.06	1.41
-35	147.5	20191223	23	2019-12-24 09:00:02	3.65	6715.41	0.62	0.06	1.4
-35	147.5	20191224	0	2019-12-24 10:00:02	3.63	8800.01	0.8	0.08	1.4
-35	147.5	20191224	1	2019-12-24 11:00:02	3.26	8729.84	0.79	0.08	1.4
-35	147.5	20191224	2	2019-12-24 12:00:02	2.97	8454.41	0.76	0.08	1.4
-35	147.5	20191224	3	2019-12-24 13:00:02	2.67	9684.32	0.88	0.09	1.4
-35	147.5	20191224	4	2019-12-24 14:00:02	2.59	9177.95	0.83	0.09	1.4
-35	147.5	20191224	5	2019-12-24 15:00:02	2.41	8571.16	0.77	0.08	1.4
-35	147.5	20191224	6	2019-12-24 16:00:02	2.22	7933.9	0.72	0.07	1.4
-35	147.5	20191224	7	2019-12-24 17:00:02	2.07	7367.49	0.67	0.07	1.4
-35	147.5	20191224	8	2019-12-24 18:00:02	1.97	6918.81	0.64	0.06	1.4
-35	147.5	20191224	9	2019-12-24 19:00:02	1.87	6561.46	0.62	0.06	1.4
-35	147.5	20191224	10	2019-12-24 20:00:02	1.85	6346.86	0.62	0.06	1.4
-35	147.5	20191224	11	2019-12-24 21:00:02	2.02	6376.72	0.65	0.06	1.4
-35	147.5	20191224	12	2019-12-24 22:00:02	2.06	6227.91	0.67	0.06	1.4
-35	147.5	20191224	13	2019-12-24 23:00:02	1.66	5613.43	0.6	0.05	1.4
-35	147.5	20191224	14	2019-12-25 00:00:02	1.13	4868.46	0.52	0.05	1.4
-35	147.5	20191224	15	2019-12-25 01:00:02	0.81	4352.47	0.45	0.04	1.4
-35	147.5	20191224	16	2019-12-25 02:00:02	0.69	4028.12	0.42	0.04	1.4
-35	147.5	20191224	17	2019-12-25 03:00:02	0.61	3747.62	0.39	0.04	1.4
-35	147.5	20191224	18	2019-12-25 04:00:02	0.58	3507.2	0.37	0.03	1.4
-35	147.5	20191224	19	2019-12-25 05:00:02	0.57	3294.32	0.37	0.03	1.4
-35	147.5	20191224	20	2019-12-25 06:00:02	0.49	3106.68	0.36	0.03	1.41
-35	147.5	20191224	21	2019-12-25 07:00:02	0.55	2940.11	0.36	0.03	1.41
-35	147.5	20191224	22	2019-12-25 08:00:02	0.84	2801.37	0.36	0.03	1.42
-35	147.5	20191224	23	2019-12-25 09:00:02	1.08	2722.75	0.34	0.03	1.41
-35	147.5	20191225	0	2019-12-25 10:00:02	1.36	3436.8	0.4	0.03	1.41
-35	147.5	20191225	1	2019-12-25 11:00:02	1.28	3370.08	0.38	0.03	1.41
-35	147.5	20191225	2	2019-12-25 12:00:02	1.18	3276.63	0.37	0.03	1.41
-35	147.5	20191225	3	2019-12-25 13:00:02	1.22	3581.03	0.38	0.03	1.41
-35	147.5	20191225	4	2019-12-25 14:00:02	1.15	3500.45	0.36	0.03	1.4
-35	147.5	20191225	5	2019-12-25 15:00:02	1.11	3424.94	0.35	0.03	1.4
-35	147.5	20191225	6	2019-12-25 16:00:02	1.93	5954.68	0.6	0.06	1.4
-35	147.5	20191225	7	2019-12-25 17:00:02	1.91	5919.11	0.59	0.06	1.4
-35	147.5	20191225	8	2019-12-25 18:00:02	1.96	5926.16	0.59	0.06	1.4
-35	147.5	20191225	9	2019-12-25 19:00:02	2	5920.48	0.58	0.06	1.4
-35	147.5	20191225	10	2019-12-25 20:00:02	2.04	5875.95	0.57	0.05	1.4
-35	147.5	20191225	11	2019-12-25 21:00:02	2.06	5799.77	0.56	0.05	1.4
-35	147.5	20191225	12	2019-12-25 22:00:02	2.07	5712	0.55	0.05	1.4
-35	147.5	20191225	13	2019-12-25 23:00:02	2.06	5628.15	0.54	0.05	1.4
-35	147.5	20191225	14	2019-12-26 00:00:02	2.07	5546.39	0.54	0.05	1.4
-35	147.5	20191225	15	2019-12-26 01:00:02	2.15	5515.11	0.54	0.05	1.4
-35	147.5	20191225	16	2019-12-26 02:00:02	2.36	5584.4	0.55	0.05	1.4
-35	147.5	20191225	17	2019-12-26 03:00:02	2.58	5707.99	0.57	0.05	1.4
-35	147.5	20191225	18	2019-12-26 04:00:02	2.69	5745.57	0.58	0.05	1.4
-35	147.5	20191225	19	2019-12-26 05:00:02	2.64	5613.79	0.58	0.05	1.4
-35	147.5	20191225	20	2019-12-26 06:00:02	2.29	5326.59	0.55	0.05	1.4
-35	147.5	20191225	21	2019-12-26 07:00:02	1.55	4944.99	0.51	0.05	1.4
-35	147.5	20191225	22	2019-12-26 08:00:02	1.26	4566.67	0.47	0.04	1.4
-35	147.5	20191225	23	2019-12-26 09:00:02	1.25	4260.01	0.44	0.04	1.4
-35	147.5	20191226	0	2019-12-26 10:00:02	2.42	7213.85	0.75	0.07	1.4
-35	147.5	20191226	1	2019-12-26 11:00:03	2.42	6731.77	0.7	0.06	1.4
-35	147.5	20191226	2	2019-12-26 12:00:03	2.37	6355.4	0.64	0.06	1.4
-35	147.5	20191226	3	2019-12-26 13:00:03	2.1	5676.36	0.56	0.05	1.4
-35	147.5	20191226	4	2019-12-26 14:00:03	2.01	5545.01	0.53	0.05	1.4
-35	147.5	20191226	5	2019-12-26 15:00:03	1.93	5463.96	0.52	0.05	1.4
-35	147.5	20191226	6	2019-12-26 16:00:03	1.86	5414.64	0.5	0.05	1.4
-35	147.5	20191226	7	2019-12-26 17:00:03	1.83	5393.47	0.5	0.05	1.4
-35	147.5	20191226	8	2019-12-26 18:00:03	1.86	5448.02	0.5	0.05	1.4
-35	147.5	20191226	9	2019-12-26 19:00:03	1.89	5593.33	0.52	0.05	1.4
-35	147.5	20191226	10	2019-12-26 20:00:03	1.91	5805.63	0.54	0.05	1.4
-35	147.5	20191226	11	2019-12-26 21:00:03	1.89	5997.43	0.57	0.06	1.4
-35	147.5	20191226	12	2019-12-26 22:00:03	1.87	6070.35	0.58	0.06	1.4
-35	147.5	20191226	13	2019-12-26 23:00:03	2.04	6133.7	0.59	0.06	1.4
-35	147.5	20191226	14	2019-12-27 00:00:03	3.02	6688.76	0.64	0.06	1.4
-35	147.5	20191226	15	2019-12-27 01:00:03	5.04	7616.43	0.74	0.07	1.4
-35	147.5	20191226	16	2019-12-27 02:00:03	6.66	7767.05	0.78	0.07	1.4
-35	147.5	20191226	17	2019-12-27 03:00:03	6.71	7057.48	0.71	0.07	1.4
-35	147.5	20191226	18	2019-12-27 04:00:03	5.68	6152.03	0.62	0.06	1.4
-35	147.5	20191226	19	2019-12-27 05:00:03	4.39	5468.25	0.55	0.05	1.4
-35	147.5	20191226	20	2019-12-27 06:00:03	3.14	4885.47	0.49	0.05	1.4
-35	147.5	20191226	21	2019-12-27 07:00:03	2.06	4333.89	0.43	0.04	1.4
-35	147.5	20191226	22	2019-12-27 08:00:03	1.37	3866.97	0.39	0.04	1.4
-35	147.5	20191226	23	2019-12-27 09:00:03	1.1	3521.47	0.36	0.03	1.4
-35	147.5	20191227	0	2019-12-27 10:00:03	1.46	5043.32	0.51	0.05	1.4
-35	147.5	20191227	1	2019-12-27 11:00:03	1.27	4547.9	0.47	0.04	1.4
-35	147.5	20191227	2	2019-12-27 12:00:03	1.15	4157.14	0.43	0.04	1.4
-35	147.5	20191227	3	2019-12-27 13:00:03	1.12	4046.11	0.42	0.04	1.4
-35	147.5	20191227	4	2019-12-27 14:00:03	1.08	3936.74	0.41	0.04	1.4
-35	147.5	20191227	5	2019-12-27 15:00:03	1.03	3843.96	0.4	0.04	1.4
-35	147.5	20191227	6	2019-12-27 16:00:03	1.15	4366.19	0.46	0.04	1.4
-35	147.5	20191227	7	2019-12-27 17:00:03	1.1	4283.45	0.47	0.04	1.41
-35	147.5	20191227	8	2019-12-27 18:00:03	1.05	4184.27	0.52	0.04	1.42
-35	147.5	20191227	9	2019-12-27 19:00:03	0.97	3985.96	0.56	0.04	1.43
-35	147.5	20191227	10	2019-12-27 20:00:03	0.86	3685.33	0.54	0.04	1.44
-35	147.5	20191227	11	2019-12-27 21:00:03	0.75	3335.31	0.51	0.03	1.44
-35	147.5	20191227	12	2019-12-27 22:00:03	0.68	3002.96	0.49	0.03	1.45
-35	147.5	20191227	13	2019-12-27 23:00:03	0.66	2761.7	0.46	0.03	1.45
-35	147.5	20191227	14	2019-12-28 00:00:03	0.68	2642.1	0.43	0.03	1.45
-35	147.5	20191227	15	2019-12-28 01:00:03	0.7	2552.52	0.39	0.03	1.44
-35	147.5	20191227	16	2019-12-28 02:00:03	0.74	2419	0.31	0.02	1.42
-35	147.5	20191227	17	2019-12-28 03:00:03	0.86	2421.95	0.27	0.02	1.4
-35	147.5	20191227	18	2019-12-28 04:00:03	1.28	2674.48	0.29	0.03	1.41
-35	147.5	20191227	19	2019-12-28 05:00:03	1.89	2875.65	0.31	0.03	1.41
-35	147.5	20191227	20	2019-12-28 06:00:03	2.14	2930.31	0.31	0.03	1.41
-35	147.5	20191227	21	2019-12-28 07:00:03	1.72	2949.89	0.31	0.03	1.41
-35	147.5	20191227	22	2019-12-28 08:00:03	1.32	2994.32	0.32	0.03	1.41
-35	147.5	20191227	23	2019-12-28 09:00:03	1.1	3078.75	0.34	0.03	1.41
-35	147.5	20191228	0	2019-12-28 10:00:03	1.41	6255.82	0.72	0.06	1.41
-35	147.5	20191228	1	2019-12-28 11:00:03	1.91	6944.33	0.9	0.07	1.43
-35	147.5	20191228	2	2019-12-28 12:00:03	2.03	7230.9	1.03	0.07	1.45
-35	147.5	20191228	3	2019-12-28 13:00:03	1.56	5668.32	0.86	0.06	1.45
-35	147.5	20191228	4	2019-12-28 14:00:03	1.83	6353.36	0.97	0.07	1.46
-35	147.5	20191228	5	2019-12-28 15:00:03	1.83	6323.73	1.01	0.07	1.45
-35	147.5	20191228	6	2019-12-28 16:00:03	1.71	6035.22	0.95	0.06	1.44
-35	147.5	20191228	7	2019-12-28 17:00:03	1.58	5922.11	0.97	0.06	1.44
-35	147.5	20191228	8	2019-12-28 18:00:03	1.6	6066.42	1.09	0.06	1.45
-35	147.5	20191228	9	2019-12-28 19:00:03	1.82	6159.84	1.19	0.07	1.46
-35	147.5	20191228	10	2019-12-28 20:00:03	1.98	5987.38	1.19	0.06	1.47
-35	147.5	20191228	11	2019-12-28 21:00:03	2.23	5624.62	1.12	0.06	1.47
-35	147.5	20191228	12	2019-12-28 22:00:03	2.56	5155.32	0.98	0.06	1.46
-35	147.5	20191228	13	2019-12-28 23:00:03	2.84	4773.43	0.87	0.05	1.46
-35	147.5	20191228	14	2019-12-29 00:00:03	2.93	4517.08	0.82	0.05	1.46
-35	147.5	20191228	15	2019-12-29 01:00:03	2.87	4389.89	0.77	0.05	1.46
-35	147.5	20191228	16	2019-12-29 02:00:03	2.75	4392.3	0.77	0.05	1.46
-35	147.5	20191228	17	2019-12-29 03:00:03	2.71	4532.41	0.85	0.05	1.47
-35	147.5	20191228	18	2019-12-29 04:00:03	2.76	4802.36	0.93	0.05	1.47
-35	147.5	20191228	19	2019-12-29 05:00:03	2.81	5100.58	0.96	0.06	1.47
-35	147.5	20191228	20	2019-12-29 06:00:03	2.55	5280.86	0.94	0.06	1.46
-35	147.5	20191228	21	2019-12-29 07:00:03	2.16	5272.48	0.9	0.05	1.45
-35	147.5	20191228	22	2019-12-29 08:00:03	1.92	5137.67	0.84	0.05	1.45
-35	147.5	20191228	23	2019-12-29 09:00:03	1.78	5027.17	0.78	0.05	1.45
-35	147.5	20191229	0	2019-12-29 10:00:03	1.63	8263.79	1.17	0.08	1.44
-35	147.5	20191229	1	2019-12-29 11:00:03	1.86	8238.72	1.15	0.08	1.44
-35	147.5	20191229	2	2019-12-29 12:00:03	2.03	7865.07	1.08	0.08	1.44
-35	147.5	20191229	3	2019-12-29 13:00:03	2.11	7182.82	0.98	0.07	1.44
-35	147.5	20191229	4	2019-12-29 14:00:03	2.04	6335.22	0.85	0.06	1.44
-35	147.5	20191229	5	2019-12-29 15:00:03	1.78	5360.61	0.69	0.05	1.44
-35	147.5	20191229	6	2019-12-29 16:00:03	1.71	5355.36	0.67	0.05	1.43
-35	147.5	20191229	7	2019-12-29 17:00:03	1.51	4838.05	0.57	0.05	1.42
-35	147.5	20191229	8	2019-12-29 18:00:03	1.42	4454.8	0.49	0.04	1.41
-35	147.5	20191229	9	2019-12-29 19:00:03	1.47	4206.4	0.46	0.04	1.41
-35	147.5	20191229	10	2019-12-29 20:00:03	1.6	4026.77	0.44	0.04	1.41
-35	147.5	20191229	11	2019-12-29 21:00:03	1.68	3832.57	0.44	0.04	1.41
-35	147.5	20191229	12	2019-12-29 22:00:03	1.67	3613.77	0.42	0.03	1.41
-35	147.5	20191229	13	2019-12-29 23:00:03	1.61	3399.75	0.4	0.03	1.41
-35	147.5	20191229	14	2019-12-30 00:00:03	1.69	3237.06	0.37	0.03	1.41
-35	147.5	20191229	15	2019-12-30 01:00:03	2.07	3168.56	0.35	0.03	1.41
-35	147.5	20191229	16	2019-12-30 02:00:03	2.62	3106.18	0.33	0.03	1.41
-35	147.5	20191229	17	2019-12-30 03:00:03	3.2	3025.78	0.31	0.03	1.4
-35	147.5	20191229	18	2019-12-30 04:00:03	3.65	2958.1	0.3	0.03	1.4
-35	147.5	20191229	19	2019-12-30 05:00:03	3.72	2885.11	0.29	0.03	1.41
-35	147.5	20191229	20	2019-12-30 06:00:03	3.35	2797.01	0.28	0.03	1.41
-35	147.5	20191229	21	2019-12-30 07:00:03	2.18	2716.11	0.26	0.03	1.41
-35	147.5	20191229	22	2019-12-30 08:00:03	0.77	2589.08	0.25	0.02	1.41
-35	147.5	20191229	23	2019-12-30 09:00:03	0.62	2582.24	0.25	0.02	1.41
-35	147.5	20191230	0	2019-12-30 10:00:03	1.28	3866.44	0.29	0.04	1.41
-35	147.5	20191230	1	2019-12-30 11:00:03	2.5	6746.53	0.43	0.06	1.41
-35	147.5	20191230	2	2019-12-30 12:00:03	2.5	7282.04	0.46	0.07	1.41
-35	147.5	20191230	3	2019-12-30 13:00:03	1.61	5488.19	0.37	0.05	1.41
-35	147.5	20191230	4	2019-12-30 14:00:03	1.88	6740.86	0.43	0.06	1.41
-35	147.5	20191230	5	2019-12-30 15:00:03	1.06	4168.36	0.3	0.04	1.41
-35	147.5	20191230	6	2019-12-30 16:00:03	0.64	2712.37	0.22	0.03	1.41
-35	147.5	20191230	7	2019-12-30 17:00:03	0.51	2171.97	0.17	0.02	1.4
-35	147.5	20191230	8	2019-12-30 18:00:03	0.44	1731.88	0.13	0.02	1.4
-35	147.5	20191230	9	2019-12-30 19:00:03	0.41	1422.37	0.11	0.01	1.4
-35	147.5	20191230	10	2019-12-30 20:00:03	0.38	1240.45	0.09	0.01	1.4
-35	147.5	20191230	11	2019-12-30 21:00:03	0.36	1123.17	0.09	0.01	1.4
-35	147.5	20191230	12	2019-12-30 22:00:03	0.38	1084.75	0.08	0.01	1.4
-35	147.5	20191230	13	2019-12-30 23:00:03	0.4	1034.36	0.08	0.01	1.4
-35	147.5	20191230	14	2019-12-31 00:00:03	0.39	911.14	0.07	0.01	1.4
-35	147.5	20191230	15	2019-12-31 01:00:03	0.39	802.08	0.06	0.01	1.41
-35	147.5	20191230	16	2019-12-31 02:00:03	0.4	752.5	0.07	0.01	1.42
-35	147.5	20191230	17	2019-12-31 03:00:03	0.43	802.1	0.1	0.01	1.43
-35	147.5	20191230	18	2019-12-31 04:00:03	0.47	903.88	0.14	0.01	1.44
-35	147.5	20191230	19	2019-12-31 05:00:03	0.58	1008.07	0.18	0.01	1.45
-35	147.5	20191230	20	2019-12-31 06:00:03	0.91	1156.1	0.2	0.01	1.45
-35	147.5	20191230	21	2019-12-31 07:00:03	0.86	1364.94	0.21	0.01	1.44
-35	147.5	20191230	22	2019-12-31 08:00:03	0.77	1456.27	0.2	0.01	1.44
-35	147.5	20191230	23	2019-12-31 09:00:03	0.84	1676.75	0.21	0.02	1.44
-35	147.5	20191231	0	2019-12-31 10:00:03	1	2927.56	0.41	0.03	1.44
-35	147.5	20191231	1	2019-12-31 11:00:03	0.85	2978.45	0.47	0.03	1.45
-35	147.5	20191231	2	2019-12-31 12:00:03	0.81	3104.2	0.59	0.03	1.49
-35	147.5	20191231	3	2019-12-31 13:00:03	0.49	1944.93	0.39	0.02	1.5
-35	147.5	20191231	4	2019-12-31 14:00:03	0.45	1868.6	0.33	0.02	1.47
-35	147.5	20191231	5	2019-12-31 15:00:03	0.38	1695.24	0.25	0.02	1.43
-35	147.5	20191231	6	2019-12-31 16:00:03	0.34	1835.81	0.24	0.02	1.41
-35	147.5	20191231	7	2019-12-31 17:00:03	0.34	2293.25	0.27	0.02	1.4
-35	147.5	20191231	8	2019-12-31 18:00:03	0.34	2687.43	0.29	0.03	1.4
-35	147.5	20191231	9	2019-12-31 19:00:03	0.55	2794.69	0.29	0.03	1.4
-35	147.5	20191231	10	2019-12-31 20:00:03	0.92	2675.56	0.26	0.02	1.4
-35	147.5	20191231	11	2019-12-31 21:00:03	1.22	2403.2	0.23	0.02	1.4
-35	147.5	20191231	12	2019-12-31 22:00:03	1.52	2231.35	0.21	0.02	1.4
-35	147.5	20191231	13	2019-12-31 23:00:03	1.93	2221.57	0.21	0.02	1.4
-35	147.5	20191231	14	2020-01-01 00:00:03	2.58	2363.69	0.22	0.02	1.4
-35	147.5	20191231	15	2020-01-01 01:00:03	3.71	2706.27	0.24	0.03	1.4
-35	147.5	20191231	16	2020-01-01 02:00:03	5.05	3244.16	0.28	0.03	1.4
-35	147.5	20191231	17	2020-01-01 03:00:03	5.82	3862.05	0.33	0.04	1.4
-35	147.5	20191231	18	2020-01-01 04:00:03	5.87	4460.15	0.39	0.04	1.4
-35	147.5	20191231	19	2020-01-01 05:00:03	5.47	4907.28	0.43	0.05	1.4
-35	147.5	20191231	20	2020-01-01 06:00:03	4.83	4959.54	0.44	0.05	1.4
-35	147.5	20191231	21	2020-01-01 07:00:03	3.7	4577.74	0.39	0.04	1.4
-35	147.5	20191231	22	2020-01-01 08:00:03	2.19	3746.61	0.31	0.03	1.4
-35	147.5	20191231	23	2020-01-01 09:00:03	1.35	2753.82	0.22	0.03	1.4
