# Supplementary material for: Black Carbon Emission, Transport and Effect on Radiation Forcing Modelling During the Summer 2019–2020 Wildfires in Southeast Australia
Source: Preprints.org preprint supplement (doi:10.20944/preprints202302.0293.v1), 2023-02-17
Supplement: Supplementary file 12 [file merra_bc_201912_190.xlsx]

## Sheet: merra_bc_201912_190
lat	lon	date	time	date_time	bc	bccmass	totexttau	bcexttau	bcangstr			Date	MERRA-2 Predicted BC	WRF-Chem BC daily	WRF-Chem predicted BC (microgams/kg)				Observed BC	Observed BC daily	WRF-Chem daily	WRF-Chem BC(micrograms/kg)	WRF-Chem BC(micrograms/m3)
-34	151.25	20191201	0	2019-12-01 10:00:00	0.43	1412.4	0.39	0.01	1.46			2019-12-01	2.65643	0.586937	0				0	0	0.586937	0	0
-34	151.25	20191201	1	2019-12-01 11:00:00	0.71	3601.97	0.6	0.04	1.43			2019-12-02	2.08042	0.938315	0			CHULLORA BC6 1h average [ng/m³]	0	0	0.938315	0	0
-34	151.25	20191201	2	2019-12-01 12:00:00	1.44	10387.8	1.13	0.1	1.41			2019-12-03	2.3875	2.54686	0				0	0	2.54686	0	0
-34	151.25	20191201	3	2019-12-01 13:00:00	1.37	8618.89	0.88	0.08	1.41			2019-12-04	2.52417	2.71158	0				0	0	2.71158	0	0
-34	151.25	20191201	4	2019-12-01 14:00:00	2.03	12128.2	1.17	0.11	1.4			2019-12-05	12.6808	4.54461	0.01				0	0	4.54461	0.01	0.01292
-34	151.25	20191201	5	2019-12-01 15:00:00	3.01	20637.1	1.94	0.19	1.4			2019-12-06	6.21708	1.55309	0.01				0	0	1.55309	0.01	0.01292
-34	151.25	20191201	6	2019-12-01 16:00:00	3.85	28417.9	2.67	0.26	1.4			2019-12-07	1.41417	0.963617	0.07				0	0	0.963617	0.07	0.09044
-34	151.25	20191201	7	2019-12-01 17:00:00	3.96	28801.5	2.76	0.27	1.4			2019-12-08	0.605417	2.54309	0.14				0	0	2.54309	0.14	0.18088
-34	151.25	20191201	8	2019-12-01 18:00:00	3.88	23181.2	2.29	0.22	1.41			2019-12-09	1.25833	1.83303	0.18				0	0	1.83303	0.18	0.23256
-34	151.25	20191201	9	2019-12-01 19:00:00	3.97	15537	1.59	0.15	1.41			2019-12-10	2.14958	0.748283	0.61				0	0	0.748283	0.61	0.78812
-34	151.25	20191201	10	2019-12-01 20:00:00	3.75	9010.09	0.92	0.08	1.41			2019-12-11	0.262083	0.0215333	1.56				0	0	0.0215333	1.56	2.01552
-34	151.25	20191201	11	2019-12-01 21:00:00	3.21	5348.22	0.54	0.05	1.41			2019-12-12	0.3875	0.0269167	2.51				0	0	0.0269167	2.51	3.24292
-34	151.25	20191201	12	2019-12-01 22:00:00	2.84	3532.25	0.36	0.03	1.41			2019-12-13	0.306667	0.0123817	0.94				0	0	0.0123817	0.94	1.21448
-34	151.25	20191201	13	2019-12-01 23:00:00	2.74	2703.09	0.29	0.03	1.42			2019-12-14	0.607083	0.0592167	0.33				0	0	0.0592167	0.33	0.42636
-34	151.25	20191201	14	2019-12-02 00:00:00	2.6	2469.18	0.27	0.02	1.42			2019-12-15	2.17208	0.408057	0.19				0	0	0.408057	0.19	0.24548
-34	151.25	20191201	15	2019-12-02 01:00:00	2.48	2326.07	0.25	0.02	1.41			2019-12-16	0.74875	0.244942	0.11				0	0	0.244942	0.11	0.14212
-34	151.25	20191201	16	2019-12-02 02:00:00	2.24	2094.96	0.24	0.02	1.42			2019-12-17	0.702917	0.0495267	0.2				0	0	0.0495267	0.2	0.2584
-34	151.25	20191201	17	2019-12-02 03:00:00	1.91	1759.74	0.22	0.02	1.43			2019-12-18	1.82917	0.131892	0.21				0	0	0.131892	0.21	0.27132
-34	151.25	20191201	18	2019-12-02 04:00:00	1.56	1424.01	0.19	0.01	1.43			2019-12-19	10.6346	2.25885	0.11				0	0	2.25885	0.11	0.14212
-34	151.25	20191201	19	2019-12-02 05:00:00	1.26	1295.17	0.17	0.01	1.43			2019-12-20	0.637083	0.922703	0.2				0	0	0.922703	0.2	0.2584
-34	151.25	20191201	20	2019-12-02 06:00:00	0.99	1236.84	0.15	0.01	1.42			2019-12-21	2.24833	1.19295	0.16				0	0	1.19295	0.16	0.20672
-34	151.25	20191201	21	2019-12-02 07:00:00	0.68	1074.73	0.13	0.01	1.42			2019-12-22	0.385	0.405365	0.07				0	0	0.405365	0.07	0.09044
-34	151.25	20191201	22	2019-12-02 08:00:00	0.43	871.25	0.1	0.01	1.41			2019-12-23	0.640417	0.085595	0.05				0	0	0.085595	0.05	0.0646
-34	151.25	20191201	23	2019-12-02 09:00:00	0.44	1030.56	0.12	0.01	1.41			2019-12-24	0.56	0.0204567	0.02				0	0	0.0204567	0.02	0.02584
-34	151.25	20191202	0	2019-12-02 10:00:00	1.1	2447.83	0.27	0.02	1.41			2019-12-25	0.444583	0	0.02				0	0	0	0.02	0.02584
-34	151.25	20191202	1	2019-12-02 11:00:00	2.14	5036.71	0.57	0.05	1.41			2019-12-26	0.397917	0.004845	0.03				0	0	0.004845	0.03	0.03876
-34	151.25	20191202	2	2019-12-02 12:00:00	4.23	10387.6	1.36	0.1	1.42			2019-12-27	0.326667	0.0349917	0.09				0	0	0.0349917	0.09	0.11628
-34	151.25	20191202	3	2019-12-02 13:00:00	6.04	13610.8	1.63	0.13	1.42			2019-12-28	0.59	0.401597	0.13				0	0	0.401597	0.13	0.16796
-34	151.25	20191202	4	2019-12-02 14:00:00	6.28	14449.8	1.5	0.14	1.41			2019-12-29	3.81	1.52295	0.79				0	0	1.52295	0.79	1.02068
-34	151.25	20191202	5	2019-12-02 15:00:00	5.75	13203	1.31	0.12	1.41			2019-12-30	1.28667	1.05137	1.33				0	0	1.05137	1.33	1.71836
-34	151.25	20191202	6	2019-12-02 16:00:00	4.06	9351.97	0.9	0.09	1.4			2019-12-31	2.6075	0.906015	1.67				0	0	0.906015	1.67	2.15764
-34	151.25	20191202	7	2019-12-02 17:00:00	2.07	4687.05	0.44	0.04	1.4			2020-01-01	0.634	0.883728	2.03				0	0	0.883728	2.03	2.62276
-34	151.25	20191202	8	2019-12-02 18:00:00	1.04	2361.84	0.23	0.02	1.4						2.05				0			2.05	2.6486
-34	151.25	20191202	9	2019-12-02 19:00:00	0.7	1576.69	0.15	0.01	1.4						1.85				0			1.85	2.3902
-34	151.25	20191202	10	2019-12-02 20:00:00	0.56	1227.44	0.12	0.01	1.4						2.34				0			2.34	3.02328
-34	151.25	20191202	11	2019-12-02 21:00:00	0.48	1012.04	0.1	0.01	1.4						1.92				0			1.92	2.48064
-34	151.25	20191202	12	2019-12-02 22:00:00	0.44	842.93	0.09	0.01	1.41						1.11				0			1.11	1.43412
-34	151.25	20191202	13	2019-12-02 23:00:00	0.45	749.67	0.08	0.01	1.4						0.75				0			0.75	0.969
-34	151.25	20191202	14	2019-12-03 00:00:00	0.5	724.52	0.08	0.01	1.4						0.48				0			0.48	0.62016
-34	151.25	20191202	15	2019-12-03 01:00:00	0.55	723.48	0.08	0.01	1.4						0.35				0			0.35	0.4522
-34	151.25	20191202	16	2019-12-03 02:00:00	0.55	707	0.07	0.01	1.4						0.32				0			0.32	0.41344
-34	151.25	20191202	17	2019-12-03 03:00:00	0.53	672.7	0.07	0.01	1.4						0.4				0			0.4	0.5168
-34	151.25	20191202	18	2019-12-03 04:00:00	0.53	659.59	0.06	0.01	1.4						0.47				0			0.47	0.60724
-34	151.25	20191202	19	2019-12-03 05:00:00	0.54	675.22	0.06	0.01	1.4						0.5				0			0.5	0.646
-34	151.25	20191202	20	2019-12-03 06:00:00	0.45	690.06	0.06	0.01	1.4						0.39				0			0.39	0.50388
-34	151.25	20191202	21	2019-12-03 07:00:00	0.32	697.12	0.06	0.01	1.4						0.27				0			0.27	0.34884
-34	151.25	20191202	22	2019-12-03 08:00:00	0.28	717.65	0.06	0.01	1.4						0.16				0			0.16	0.20672
-34	151.25	20191202	23	2019-12-03 09:00:00	0.29	817.73	0.07	0.01	1.4						0.13				0			0.13	0.16796
-34	151.25	20191203	0	2019-12-03 10:00:00	0.44	1128.85	0.1	0.01	1.4						0.09				0			0.09	0.11628
-34	151.25	20191203	1	2019-12-03 11:00:00	1.01	2734.97	0.24	0.03	1.4						0.1				0			0.1	0.1292
-34	151.25	20191203	2	2019-12-03 12:00:00	2.85	7749.46	0.66	0.07	1.4						0.18				0			0.18	0.23256
-34	151.25	20191203	3	2019-12-03 13:00:00	1.34	3588.05	0.33	0.03	1.4						1.41				0			1.41	1.82172
-34	151.25	20191203	4	2019-12-03 14:00:00	2.26	6670.47	0.59	0.06	1.4						4.22				0			4.22	5.45224
-34	151.25	20191203	5	2019-12-03 15:00:00	4.65	14366.3	1.22	0.13	1.4						5.74				0			5.74	7.41608
-34	151.25	20191203	6	2019-12-03 16:00:00	7.5	21227	1.77	0.2	1.4						6				0			6	7.752
-34	151.25	20191203	7	2019-12-03 17:00:00	8.71	22128	1.83	0.21	1.4						4.86				0			4.86	6.27912
-34	151.25	20191203	8	2019-12-03 18:00:00	8.43	17032.3	1.42	0.16	1.4						3.82				0			3.82	4.93544
-34	151.25	20191203	9	2019-12-03 19:00:00	6.71	9512	0.81	0.09	1.4						4.04				0			4.04	5.21968
-34	151.25	20191203	10	2019-12-03 20:00:00	4.15	4630.79	0.42	0.04	1.4						4.15				0			4.15	5.3618
-34	151.25	20191203	11	2019-12-03 21:00:00	2.3	2741.04	0.26	0.03	1.4						2.9				0			2.9	3.7468
-34	151.25	20191203	12	2019-12-03 22:00:00	1.41	1939.6	0.18	0.02	1.4						3.85				0			3.85	4.9742
-34	151.25	20191203	13	2019-12-03 23:00:00	1	1505.53	0.14	0.01	1.4						2.48				0			2.48	3.20416
-34	151.25	20191203	14	2019-12-04 00:00:00	0.89	1309.08	0.12	0.01	1.4						1.08				0			1.08	1.39536
-34	151.25	20191203	15	2019-12-04 01:00:00	0.86	1165.57	0.11	0.01	1.4						0.74				0			0.74	0.95608
-34	151.25	20191203	16	2019-12-04 02:00:00	0.87	1033.83	0.1	0.01	1.4						0.92				0			0.92	1.18864
-34	151.25	20191203	17	2019-12-04 03:00:00	0.92	974.41	0.09	0.01	1.4						1				0			1	1.292
-34	151.25	20191203	18	2019-12-04 04:00:00	1.01	991.12	0.09	0.01	1.4						1.18				0			1.18	1.52456
-34	151.25	20191203	19	2019-12-04 05:00:00	1.18	1039.63	0.09	0.01	1.4						1.38				0			1.38	1.78296
-34	151.25	20191203	20	2019-12-04 06:00:00	1.2	1072.98	0.1	0.01	1.4						0.28				0			0.28	0.36176
-34	151.25	20191203	21	2019-12-04 07:00:00	0.89	1095.97	0.1	0.01	1.4						0.16				0			0.16	0.20672
-34	151.25	20191203	22	2019-12-04 08:00:00	0.62	1092.54	0.1	0.01	1.4						0.35				0			0.35	0.4522
-34	151.25	20191203	23	2019-12-04 09:00:00	0.52	1172.41	0.1	0.01	1.4						0.52				0			0.52	0.67184
-34	151.25	20191204	0	2019-12-04 10:00:00	0.63	1662.92	0.15	0.02	1.4						0.61				0			0.61	0.78812
-34	151.25	20191204	1	2019-12-04 11:00:00	1.25	4494.51	0.39	0.04	1.4						0.47				0			0.47	0.60724
-34	151.25	20191204	2	2019-12-04 12:00:00	2.9	12670.7	1.09	0.12	1.4						0.83				0			0.83	1.07236
-34	151.25	20191204	3	2019-12-04 13:00:00	1.44	5840.27	0.52	0.05	1.4						1.96				0			1.96	2.53232
-34	151.25	20191204	4	2019-12-04 14:00:00	1.76	9447.75	0.84	0.09	1.4						2.5				0			2.5	3.23
-34	151.25	20191204	5	2019-12-04 15:00:00	2.02	18444.9	1.63	0.17	1.4						3.78				0			3.78	4.88376
-34	151.25	20191204	6	2019-12-04 16:00:00	15.87	41814.9	3.66	0.39	1.4						4.9				0			4.9	6.3308
-34	151.25	20191204	7	2019-12-04 17:00:00	9.67	41827	3.69	0.39	1.4						4.62				0			4.62	5.96904
-34	151.25	20191204	8	2019-12-04 18:00:00	5.54	36551.8	3.23	0.34	1.4						3.97				0			3.97	5.12924
-34	151.25	20191204	9	2019-12-04 19:00:00	3.1	26151.9	2.31	0.24	1.4						3.4				0			3.4	4.3928
-34	151.25	20191204	10	2019-12-04 20:00:00	2.11	15991	1.42	0.15	1.4						3.63				0			3.63	4.68996
-34	151.25	20191204	11	2019-12-04 21:00:00	1.69	9721.58	0.87	0.09	1.4						4.06				0			4.06	5.24552
-34	151.25	20191204	12	2019-12-04 22:00:00	1.58	6340.39	0.57	0.06	1.4						4.28				0			4.28	5.52976
-34	151.25	20191204	13	2019-12-04 23:00:00	2.06	4636.28	0.42	0.04	1.4						3.75				0			3.75	4.845
-34	151.25	20191204	14	2019-12-05 00:00:00	3.51	3829.74	0.34	0.04	1.4						3.61				0			3.61	4.66412
-34	151.25	20191204	15	2019-12-05 01:00:00	6.22	3477.13	0.31	0.03	1.4						2.48				0			2.48	3.20416
-34	151.25	20191204	16	2019-12-05 02:00:00	9.45	3280.46	0.29	0.03	1.4						1.31				0			1.31	1.69252
-34	151.25	20191204	17	2019-12-05 03:00:00	12.64	3191.16	0.28	0.03	1.4						0.75				0			0.75	0.969
-34	151.25	20191204	18	2019-12-05 04:00:00	15.05	3191.58	0.28	0.03	1.4						0.5				0			0.5	0.646
-34	151.25	20191204	19	2019-12-05 05:00:00	15.91	3157.53	0.28	0.03	1.4						0.43				0			0.43	0.55556
-34	151.25	20191204	20	2019-12-05 06:00:00	14.83	3037.33	0.27	0.03	1.4						0.39				0			0.39	0.50388
-34	151.25	20191204	21	2019-12-05 07:00:00	9.72	2965.68	0.26	0.03	1.4						0.41				0			0.41	0.52972
-34	151.25	20191204	22	2019-12-05 08:00:00	5.1	2801.7	0.24	0.03	1.4						0.42				0			0.42	0.54264
-34	151.25	20191204	23	2019-12-05 09:00:00	3.19	2726.22	0.24	0.03	1.4						0.34				0			0.34	0.43928
-34	151.25	20191205	0	2019-12-05 10:00:00	3.28	5722.77	0.5	0.05	1.4						0.21				0			0.21	0.27132
-34	151.25	20191205	1	2019-12-05 11:00:00	7.25	18885.6	1.59	0.18	1.4						0.11				0			0.11	0.14212
-34	151.25	20191205	2	2019-12-05 12:00:00	17.37	49969.7	4.12	0.46	1.4						0.13				0			0.13	0.16796
-34	151.25	20191205	3	2019-12-05 13:00:00	9.67	28763.2	2.36	0.27	1.4						0.96				0			0.96	1.24032
-34	151.25	20191205	4	2019-12-05 14:00:00	17.15	52396.7	4.23	0.49	1.4						1.32				0			1.32	1.70544
-34	151.25	20191205	5	2019-12-05 15:00:00	24.87	75849.3	6	0.7	1.4						1.9				0			1.9	2.4548
-34	151.25	20191205	6	2019-12-05 16:00:00	28.59	76445.5	5.99	0.71	1.4						2.68				0			2.68	3.46256
-34	151.25	20191205	7	2019-12-05 17:00:00	28.84	55701.6	4.34	0.52	1.4						4.36				0			4.36	5.63312
-34	151.25	20191205	8	2019-12-05 18:00:00	25.7	30489	2.37	0.28	1.4						6.93				0			6.93	8.95356
-34	151.25	20191205	9	2019-12-05 19:00:00	19.29	15147	1.18	0.14	1.4						15.95				0			15.95	20.6074
-34	151.25	20191205	10	2019-12-05 20:00:00	11.73	8939.65	0.71	0.08	1.41						16.28				0			16.28	21.0338
-34	151.25	20191205	11	2019-12-05 21:00:00	6.36	6042.7	0.49	0.06	1.41						11.12				0			11.12	14.367
-34	151.25	20191205	12	2019-12-05 22:00:00	4.41	4531.17	0.37	0.04	1.41						6.36				0			6.36	8.21712
-34	151.25	20191205	13	2019-12-05 23:00:00	4.21	3810.87	0.32	0.04	1.41						5.47				0			5.47	7.06724
-34	151.25	20191205	14	2019-12-06 00:00:00	5.04	3410.02	0.31	0.03	1.42						6.21				0			6.21	8.02332
-34	151.25	20191205	15	2019-12-06 01:00:00	5.72	3093.57	0.29	0.03	1.42						4.87				0			4.87	6.29204
-34	151.25	20191205	16	2019-12-06 02:00:00	6.04	2727.99	0.26	0.03	1.42						3.73				0			3.73	4.81916
-34	151.25	20191205	17	2019-12-06 03:00:00	6.47	2535.04	0.24	0.02	1.42						3.05				0			3.05	3.9406
-34	151.25	20191205	18	2019-12-06 04:00:00	7.26	2553.67	0.24	0.02	1.41						2.49				0			2.49	3.21708
-34	151.25	20191205	19	2019-12-06 05:00:00	8.36	2649.76	0.25	0.03	1.41						2.15				0			2.15	2.7778
-34	151.25	20191205	20	2019-12-06 06:00:00	8.3	2761.77	0.27	0.03	1.41						2.12				0			2.12	2.73904
-34	151.25	20191205	21	2019-12-06 07:00:00	5.97	2937.45	0.29	0.03	1.42						2.1				0			2.1	2.7132
-34	151.25	20191205	22	2019-12-06 08:00:00	4.56	3548.62	0.35	0.03	1.42						1.42				0			1.42	1.83464
-34	151.25	20191205	23	2019-12-06 09:00:00	4.08	5259.31	0.51	0.05	1.42						0.52				0			0.52	0.67184
-34	151.25	20191206	0	2019-12-06 10:00:00	3.83	7094.41	0.68	0.07	1.42						0.17				0			0.17	0.21964
-34	151.25	20191206	1	2019-12-06 11:00:00	5.1	13090.6	1.17	0.12	1.41						0				0			0	0
-34	151.25	20191206	2	2019-12-06 12:00:00	8.12	25733.9	2.17	0.24	1.41						0				0			0	0
-34	151.25	20191206	3	2019-12-06 13:00:00	11.7	38840.7	3.15	0.36	1.41						0				0			0	0
-34	151.25	20191206	4	2019-12-06 14:00:00	20.24	52419.1	4.14	0.49	1.4						0				0			0	0
-34	151.25	20191206	5	2019-12-06 15:00:00	26.12	65714	5.13	0.61	1.4						0				0			0	0
-34	151.25	20191206	6	2019-12-06 16:00:00	2.23	7311.79	0.59	0.07	1.4						0				0			0	0
-34	151.25	20191206	7	2019-12-06 17:00:00	2.41	7885.2	0.65	0.07	1.4						0				0			0	0
-34	151.25	20191206	8	2019-12-06 18:00:00	2.16	8888.48	0.75	0.08	1.4						0				0			0	0
-34	151.25	20191206	9	2019-12-06 19:00:00	1.71	8785.04	0.77	0.08	1.4						0				0			0	0
-34	151.25	20191206	10	2019-12-06 20:00:00	1.28	7150.02	0.68	0.07	1.41						0				0			0	0
-34	151.25	20191206	11	2019-12-06 21:00:00	1	4810.23	0.55	0.05	1.41						0				0			0	0
-34	151.25	20191206	12	2019-12-06 22:00:00	0.82	3005.66	0.43	0.03	1.43						0.01				0			0.01	0.01292
-34	151.25	20191206	13	2019-12-06 23:00:00	0.69	2038.27	0.35	0.02	1.44						0.01				0			0.01	0.01292
-34	151.25	20191206	14	2019-12-07 00:00:00	0.68	1623.44	0.29	0.02	1.44						0.01				0			0.01	0.01292
-34	151.25	20191206	15	2019-12-07 01:00:00	0.7	1466.18	0.28	0.01	1.44						0.01				0			0.01	0.01292
-34	151.25	20191206	16	2019-12-07 02:00:00	0.72	1377.51	0.24	0.01	1.43						0.02				0			0.02	0.02584
-34	151.25	20191206	17	2019-12-07 03:00:00	0.75	1313.12	0.21	0.01	1.43						0.02				0			0.02	0.02584
-34	151.25	20191206	18	2019-12-07 04:00:00	0.92	1299.98	0.2	0.01	1.43						0.03				0			0.03	0.03876
-34	151.25	20191206	19	2019-12-07 05:00:00	1.52	1412.69	0.2	0.01	1.42						0.04				0			0.04	0.05168
-34	151.25	20191206	20	2019-12-07 06:00:00	2.37	1683.54	0.23	0.02	1.42						0.09				0			0.09	0.11628
-34	151.25	20191206	21	2019-12-07 07:00:00	2.17	1874.66	0.24	0.02	1.41						0.46				0			0.46	0.59432
-34	151.25	20191206	22	2019-12-07 08:00:00	1.92	2279.9	0.27	0.02	1.41						1.18				0			1.18	1.52456
-34	151.25	20191206	23	2019-12-07 09:00:00	1.86	3142.72	0.34	0.03	1.41						1.67				0			1.67	2.15764
-34	151.25	20191207	0	2019-12-07 10:00:00	2.66	6766.51	0.63	0.06	1.41						1.78				0			1.78	2.29976
-34	151.25	20191207	1	2019-12-07 11:00:00	2.65	6992.55	0.67	0.07	1.41						1.91				0			1.91	2.46772
-34	151.25	20191207	2	2019-12-07 12:00:00	2.45	9595.03	0.91	0.09	1.41						1.79				0			1.79	2.31268
-34	151.25	20191207	3	2019-12-07 13:00:00	3.54	17044.8	1.59	0.16	1.41						1.62				0			1.62	2.09304
-34	151.25	20191207	4	2019-12-07 14:00:00	2.5	17742.7	1.65	0.17	1.4						1.4				0			1.4	1.8088
-34	151.25	20191207	5	2019-12-07 15:00:00	1.61	21147	1.92	0.2	1.4						1.23				0			1.23	1.58916
-34	151.25	20191207	6	2019-12-07 16:00:00	1.02	24784.6	2.2	0.23	1.4						1.06				0			1.06	1.36952
-34	151.25	20191207	7	2019-12-07 17:00:00	0.73	24724.5	2.21	0.23	1.4						0.75				0			0.75	0.969
-34	151.25	20191207	8	2019-12-07 18:00:00	0.6	21177.5	1.91	0.2	1.4						0.37				0			0.37	0.47804
-34	151.25	20191207	9	2019-12-07 19:00:00	0.56	15822.4	1.45	0.15	1.4						0.28				0			0.28	0.36176
-34	151.25	20191207	10	2019-12-07 20:00:00	0.53	10893.7	1.04	0.1	1.4						0.32				0			0.32	0.41344
-34	151.25	20191207	11	2019-12-07 21:00:00	0.51	7425.99	0.76	0.07	1.4						0.4				0			0.4	0.5168
-34	151.25	20191207	12	2019-12-07 22:00:00	0.49	5360.17	0.58	0.05	1.4						0.58				0			0.58	0.74936
-34	151.25	20191207	13	2019-12-07 23:00:00	0.48	4113.68	0.48	0.04	1.41						0.88				0			0.88	1.13696
-34	151.25	20191207	14	2019-12-08 00:00:00	0.46	3363.22	0.41	0.03	1.41						1.25				0			1.25	1.615
-34	151.25	20191207	15	2019-12-08 01:00:00	0.44	2894.6	0.37	0.03	1.41						1.53				0			1.53	1.97676
-34	151.25	20191207	16	2019-12-08 02:00:00	0.47	2568.23	0.34	0.02	1.41						1.74				0			1.74	2.24808
-34	151.25	20191207	17	2019-12-08 03:00:00	0.53	2337.98	0.32	0.02	1.41						2.2				0			2.2	2.8424
-34	151.25	20191207	18	2019-12-08 04:00:00	0.57	2174.55	0.3	0.02	1.41						3.07				0			3.07	3.96644
-34	151.25	20191207	19	2019-12-08 05:00:00	0.6	2033.61	0.29	0.02	1.41						4.05				0			4.05	5.2326
-34	151.25	20191207	20	2019-12-08 06:00:00	0.44	1896.56	0.28	0.02	1.41						5.03				0			5.03	6.49876
-34	151.25	20191207	21	2019-12-08 07:00:00	0.33	1761.11	0.29	0.02	1.42						5.67				0			5.67	7.32564
-34	151.25	20191207	22	2019-12-08 08:00:00	0.4	1637.45	0.31	0.02	1.44						5.06				0			5.06	6.53752
-34	151.25	20191207	23	2019-12-08 09:00:00	0.49	1550.61	0.32	0.02	1.45						3.93				0			3.93	5.07756
-34	151.25	20191208	0	2019-12-08 10:00:00	0.51	16540.9	1.6	0.16	1.41						1.98				0			1.98	2.55816
-34	151.25	20191208	1	2019-12-08 11:00:00	0.73	17741.6	1.8	0.17	1.41						0.74				0			0.74	0.95608
-34	151.25	20191208	2	2019-12-08 12:00:00	0.94	18644.4	1.95	0.18	1.41						0.56				0			0.56	0.72352
-34	151.25	20191208	3	2019-12-08 13:00:00	0.71	8715.04	1.02	0.08	1.42						0.58				0			0.58	0.74936
-34	151.25	20191208	4	2019-12-08 14:00:00	0.81	9356.12	1.08	0.09	1.41						0.82				0			0.82	1.05944
-34	151.25	20191208	5	2019-12-08 15:00:00	0.81	9941.27	1.09	0.09	1.41						1.15				0			1.15	1.4858
-34	151.25	20191208	6	2019-12-08 16:00:00	0.77	10333.3	1.08	0.1	1.41						1.25				0			1.25	1.615
-34	151.25	20191208	7	2019-12-08 17:00:00	0.7	10610.1	1.07	0.1	1.41						1.09				0			1.09	1.40828
-34	151.25	20191208	8	2019-12-08 18:00:00	0.63	10658.8	1.05	0.1	1.41						0.94				0			0.94	1.21448
-34	151.25	20191208	9	2019-12-08 19:00:00	0.61	10377.1	1.02	0.1	1.41						0.85				0			0.85	1.0982
-34	151.25	20191208	10	2019-12-08 20:00:00	0.62	9850.03	0.97	0.09	1.41						0.79				0			0.79	1.02068
-34	151.25	20191208	11	2019-12-08 21:00:00	0.62	9300.03	0.91	0.09	1.41						0.78				0			0.78	1.00776
-34	151.25	20191208	12	2019-12-08 22:00:00	0.64	8801.15	0.87	0.08	1.41						0.84				0			0.84	1.08528
-34	151.25	20191208	13	2019-12-08 23:00:00	0.7	8302.09	0.82	0.08	1.41						1.34				0			1.34	1.73128
-34	151.25	20191208	14	2019-12-09 00:00:00	0.73	7792.51	0.78	0.07	1.41						1.7				0			1.7	2.1964
-34	151.25	20191208	15	2019-12-09 01:00:00	0.72	7302.38	0.74	0.07	1.41						1.68				0			1.68	2.17056
-34	151.25	20191208	16	2019-12-09 02:00:00	0.69	6895.26	0.71	0.06	1.41						1.54				0			1.54	1.98968
-34	151.25	20191208	17	2019-12-09 03:00:00	0.65	6680.26	0.7	0.06	1.41						1.24				0			1.24	1.60208
-34	151.25	20191208	18	2019-12-09 04:00:00	0.63	6709.2	0.71	0.06	1.41						0.96				0			0.96	1.24032
-34	151.25	20191208	19	2019-12-09 05:00:00	0.61	6953.09	0.74	0.07	1.41						0.71				0			0.71	0.91732
-34	151.25	20191208	20	2019-12-09 06:00:00	0.5	7364.18	0.77	0.07	1.41						0.6				0			0.6	0.7752
-34	151.25	20191208	21	2019-12-09 07:00:00	0.4	7823.83	0.82	0.07	1.41						0.64				0			0.64	0.82688
-34	151.25	20191208	22	2019-12-09 08:00:00	0.47	8149.85	0.85	0.08	1.41						0.8				0			0.8	1.0336
-34	151.25	20191208	23	2019-12-09 09:00:00	0.6	8238.57	0.84	0.08	1.41						0.93				0			0.93	1.20156
-34	151.25	20191209	0	2019-12-09 10:00:00	0.87	8519.37	0.84	0.08	1.41						1.04				0			1.04	1.34368
-34	151.25	20191209	1	2019-12-09 11:00:00	1.27	9194.77	0.89	0.09	1.41						0.97				0			0.97	1.25324
-34	151.25	20191209	2	2019-12-09 12:00:00	1.76	10422.5	0.99	0.1	1.41						0.66				0			0.66	0.85272
-34	151.25	20191209	3	2019-12-09 13:00:00	4.89	22558.8	1.79	0.21	1.4						0.91				0			0.91	1.17572
-34	151.25	20191209	4	2019-12-09 14:00:00	4.34	23739.2	1.95	0.22	1.4						1.02				0			1.02	1.31784
-34	151.25	20191209	5	2019-12-09 15:00:00	3.07	29929.7	2.53	0.28	1.4						1.09				0			1.09	1.40828
-34	151.25	20191209	6	2019-12-09 16:00:00	2.04	41278.5	3.59	0.38	1.4						1.3				0			1.3	1.6796
-34	151.25	20191209	7	2019-12-09 17:00:00	1.42	50829.1	4.52	0.47	1.4						1.51				0			1.51	1.95092
-34	151.25	20191209	8	2019-12-09 18:00:00	1.05	54585.1	4.96	0.51	1.4						2.3				0			2.3	2.9716
-34	151.25	20191209	9	2019-12-09 19:00:01	0.83	52379.1	4.83	0.49	1.4						2.62				0			2.62	3.38504
-34	151.25	20191209	10	2019-12-09 20:00:01	0.71	46418.7	4.29	0.43	1.4						2.52				0			2.52	3.25584
-34	151.25	20191209	11	2019-12-09 21:00:01	0.66	39447.1	3.64	0.37	1.4						1.58				0			1.58	2.04136
-34	151.25	20191209	12	2019-12-09 22:00:01	0.64	33277.3	3.08	0.31	1.4						2.29				0			2.29	2.95868
-34	151.25	20191209	13	2019-12-09 23:00:01	0.65	28404.6	2.64	0.26	1.4						3.44				0			3.44	4.44448
-34	151.25	20191209	14	2019-12-10 00:00:01	0.67	24336.2	2.27	0.23	1.4						1.6				0			1.6	2.0672
-34	151.25	20191209	15	2019-12-10 01:00:01	0.76	20789.8	1.93	0.19	1.4						1.7				0			1.7	2.1964
-34	151.25	20191209	16	2019-12-10 02:00:01	1.13	17487.4	1.61	0.16	1.4						2.08				0			2.08	2.68736
-34	151.25	20191209	17	2019-12-10 03:00:01	2.06	14549.5	1.32	0.14	1.4						2.23				0			2.23	2.88116
-34	151.25	20191209	18	2019-12-10 04:00:01	3.86	12157.9	1.12	0.11	1.41						2.12				0			2.12	2.73904
-34	151.25	20191209	19	2019-12-10 05:00:01	5.84	10267.2	0.97	0.1	1.41						1.58				0			1.58	2.04136
-34	151.25	20191209	20	2019-12-10 06:00:01	7.05	8841.83	0.82	0.08	1.41						1.18				0			1.18	1.52456
-34	151.25	20191209	21	2019-12-10 07:00:01	6.45	7780.64	0.69	0.07	1.41						0.79				0			0.79	1.02068
-34	151.25	20191209	22	2019-12-10 08:00:01	5.81	6987.16	0.6	0.07	1.41						0.36				0			0.36	0.46512
-34	151.25	20191209	23	2019-12-10 09:00:01	5.32	6685.85	0.57	0.06	1.41						0.1				0			0.1	0.1292
-34	151.25	20191210	0	2019-12-10 10:00:01	1.01	11464	0.96	0.11	1.41						0.03				0			0.03	0.03876
-34	151.25	20191210	1	2019-12-10 11:00:01	1.42	11166.8	0.93	0.1	1.4						0.01				0			0.01	0.01292
-34	151.25	20191210	2	2019-12-10 12:00:01	1.86	12757.5	1.07	0.12	1.4						0.02				0			0.02	0.02584
-34	151.25	20191210	3	2019-12-10 13:00:01	1.85	19741.6	1.69	0.18	1.41						0.01				0			0.01	0.01292
-34	151.25	20191210	4	2019-12-10 14:00:01	1.82	19333.3	1.83	0.18	1.41						0.01				0			0.01	0.01292
-34	151.25	20191210	5	2019-12-10 15:00:01	1.23	18793.6	2.1	0.18	1.42						0.01				0			0.01	0.01292
-34	151.25	20191210	6	2019-12-10 16:00:01	0.87	17885.2	2.44	0.18	1.43						0.01				0			0.01	0.01292
-34	151.25	20191210	7	2019-12-10 17:00:01	0.72	15574.2	2.57	0.16	1.44						0.02				0			0.02	0.02584
-34	151.25	20191210	8	2019-12-10 18:00:01	0.49	12298.1	2.22	0.13	1.44						0.02				0			0.02	0.02584
-34	151.25	20191210	9	2019-12-10 19:00:01	0.35	9305.49	1.82	0.1	1.45						0.01				0			0.01	0.01292
-34	151.25	20191210	10	2019-12-10 20:00:01	0.29	6787.4	1.47	0.07	1.46						0				0			0	0
-34	151.25	20191210	11	2019-12-10 21:00:01	0.27	4776.67	1.14	0.05	1.47						0				0			0	0
-34	151.25	20191210	12	2019-12-10 22:00:01	0.23	3003.98	0.7	0.03	1.47						0				0			0	0
-34	151.25	20191210	13	2019-12-10 23:00:01	0.23	1901.03	0.46	0.02	1.46						0.01				0			0.01	0.01292
-34	151.25	20191210	14	2019-12-11 00:00:01	0.25	1533.45	0.38	0.02	1.45						0.02				0			0.02	0.02584
-34	151.25	20191210	15	2019-12-11 01:00:01	0.27	1480.13	0.36	0.01	1.44						0.03				0			0.03	0.03876
-34	151.25	20191210	16	2019-12-11 02:00:01	0.29	1430.72	0.35	0.01	1.44						0.04				0			0.04	0.05168
-34	151.25	20191210	17	2019-12-11 03:00:01	0.3	1356.56	0.33	0.01	1.44						0.05				0			0.05	0.0646
-34	151.25	20191210	18	2019-12-11 04:00:01	0.3	1305.67	0.32	0.01	1.44						0.06				0			0.06	0.07752
-34	151.25	20191210	19	2019-12-11 05:00:01	0.28	1262.85	0.3	0.01	1.43						0.05				0			0.05	0.0646
-34	151.25	20191210	20	2019-12-11 06:00:01	0.26	1189.15	0.27	0.01	1.43						0.02				0			0.02	0.02584
-34	151.25	20191210	21	2019-12-11 07:00:01	0.25	1085.52	0.26	0.01	1.44						0				0			0	0
-34	151.25	20191210	22	2019-12-11 08:00:01	0.25	993.06	0.24	0.01	1.44						0				0			0	0
-34	151.25	20191210	23	2019-12-11 09:00:01	0.25	938.02	0.23	0.01	1.44						0.01				0			0.01	0.01292
-34	151.25	20191211	0	2019-12-11 10:00:01	0.5	3393.41	0.46	0.03	1.43						0.01				0			0.01	0.01292
-34	151.25	20191211	1	2019-12-11 11:00:01	0.49	4194.32	0.52	0.04	1.42						0.01				0			0.01	0.01292
-34	151.25	20191211	2	2019-12-11 12:00:01	0.48	5823.81	0.63	0.05	1.41						0.02				0			0.02	0.02584
-34	151.25	20191211	3	2019-12-11 13:00:01	0.48	7266.44	0.76	0.07	1.41						0.01				0			0.01	0.01292
-34	151.25	20191211	4	2019-12-11 14:00:01	0.34	8300.92	0.86	0.08	1.41						0.02				0			0.02	0.02584
-34	151.25	20191211	5	2019-12-11 15:00:01	0.21	10321.3	1.07	0.1	1.4						0.01				0			0.01	0.01292
-34	151.25	20191211	6	2019-12-11 16:00:01	0.12	12444.8	1.27	0.12	1.4						0.01				0			0.01	0.01292
-34	151.25	20191211	7	2019-12-11 17:00:01	0.13	11770.5	1.17	0.11	1.4						0.01				0			0.01	0.01292
-34	151.25	20191211	8	2019-12-11 18:00:01	0.12	9152.04	0.9	0.09	1.4						0.01				0			0.01	0.01292
-34	151.25	20191211	9	2019-12-11 19:00:01	0.12	6209.49	0.64	0.06	1.41						0.01				0			0.01	0.01292
-34	151.25	20191211	10	2019-12-11 20:00:01	0.13	4236.76	0.5	0.04	1.41						0				0			0	0
-34	151.25	20191211	11	2019-12-11 21:00:01	0.14	3131.23	0.43	0.03	1.42						0				0			0	0
-34	151.25	20191211	12	2019-12-11 22:00:01	0.15	2468.4	0.42	0.02	1.44						0				0			0	0
-34	151.25	20191211	13	2019-12-11 23:00:01	0.18	2039.48	0.46	0.02	1.46						0				0			0	0
-34	151.25	20191211	14	2019-12-12 00:00:01	0.23	1789.07	0.43	0.02	1.47						0				0			0	0
-34	151.25	20191211	15	2019-12-12 01:00:01	0.25	1657.4	0.39	0.02	1.46						0				0			0	0
-34	151.25	20191211	16	2019-12-12 02:00:01	0.25	1586.54	0.34	0.02	1.45						0				0			0	0
-34	151.25	20191211	17	2019-12-12 03:00:01	0.25	1542.44	0.31	0.02	1.44						0				0			0	0
-34	151.25	20191211	18	2019-12-12 04:00:01	0.26	1513.74	0.29	0.02	1.44						0				0			0	0
-34	151.25	20191211	19	2019-12-12 05:00:01	0.27	1483.03	0.26	0.02	1.44						0.01				0			0.01	0.01292
-34	151.25	20191211	20	2019-12-12 06:00:01	0.26	1432.6	0.24	0.01	1.43						0.01				0			0.01	0.01292
-34	151.25	20191211	21	2019-12-12 07:00:01	0.28	1346.62	0.22	0.01	1.42						0.01				0			0.01	0.01292
-34	151.25	20191211	22	2019-12-12 08:00:01	0.29	1245.01	0.22	0.01	1.42						0.02				0			0.02	0.02584
-34	151.25	20191211	23	2019-12-12 09:00:01	0.3	1168.2	0.24	0.01	1.44						0.02				0			0.02	0.02584
-34	151.25	20191212	0	2019-12-12 10:00:01	0.42	2741.88	0.46	0.03	1.44						0.04				0			0.04	0.05168
-34	151.25	20191212	1	2019-12-12 11:00:01	0.44	2765.72	0.49	0.03	1.44						0.03				0			0.03	0.03876
-34	151.25	20191212	2	2019-12-12 12:00:01	0.4	3073.45	0.51	0.03	1.44						0.03				0			0.03	0.03876
-34	151.25	20191212	3	2019-12-12 13:00:01	1.26	7344.21	1.04	0.07	1.42						0.04				0			0.04	0.05168
-34	151.25	20191212	4	2019-12-12 14:00:01	0.87	6822.17	0.89	0.07	1.41						0.04				0			0.04	0.05168
-34	151.25	20191212	5	2019-12-12 15:00:01	0.62	6831.34	0.81	0.06	1.41						0.04				0			0.04	0.05168
-34	151.25	20191212	6	2019-12-12 16:00:01	0.48	6735.94	0.78	0.06	1.41						0.04				0			0.04	0.05168
-34	151.25	20191212	7	2019-12-12 17:00:01	0.41	6179.03	0.73	0.06	1.41						0.04				0			0.04	0.05168
-34	151.25	20191212	8	2019-12-12 18:00:01	0.36	5258.99	0.65	0.05	1.41						0.05				0			0.05	0.0646
-34	151.25	20191212	9	2019-12-12 19:00:01	0.33	4211.89	0.55	0.04	1.41						0.03				0			0.03	0.03876
-34	151.25	20191212	10	2019-12-12 20:00:01	0.3	3409.47	0.5	0.03	1.42						0.02				0			0.02	0.02584
-34	151.25	20191212	11	2019-12-12 21:00:01	0.28	2829.13	0.48	0.03	1.43						0.01				0			0.01	0.01292
-34	151.25	20191212	12	2019-12-12 22:00:01	0.26	2407.63	0.49	0.02	1.45						0.01				0			0.01	0.01292
-34	151.25	20191212	13	2019-12-12 23:00:01	0.23	2108.92	0.47	0.02	1.45						0.01				0			0.01	0.01292
-34	151.25	20191212	14	2019-12-13 00:00:01	0.21	1910.84	0.43	0.02	1.45						0.01				0			0.01	0.01292
-34	151.25	20191212	15	2019-12-13 01:00:01	0.19	1795.6	0.38	0.02	1.45						0.01				0			0.01	0.01292
-34	151.25	20191212	16	2019-12-13 02:00:01	0.19	1735.19	0.34	0.02	1.44						0.01				0			0.01	0.01292
-34	151.25	20191212	17	2019-12-13 03:00:01	0.19	1698.9	0.32	0.02	1.44						0.03				0			0.03	0.03876
-34	151.25	20191212	18	2019-12-13 04:00:01	0.2	1613.05	0.3	0.02	1.44						0.04				0			0.04	0.05168
-34	151.25	20191212	19	2019-12-13 05:00:01	0.21	1522.95	0.29	0.02	1.45						0.04				0			0.04	0.05168
-34	151.25	20191212	20	2019-12-13 06:00:01	0.2	1447.49	0.28	0.02	1.45						0.03				0			0.03	0.03876
-34	151.25	20191212	21	2019-12-13 07:00:01	0.21	1373.12	0.29	0.01	1.47						0.01				0			0.01	0.01292
-34	151.25	20191212	22	2019-12-13 08:00:01	0.26	1293.35	0.28	0.01	1.46						0				0			0	0
-34	151.25	20191212	23	2019-12-13 09:00:01	0.31	1215.16	0.29	0.01	1.48						0				0			0	0
-34	151.25	20191213	0	2019-12-13 10:00:01	0.37	1346.61	0.38	0.02	1.5						0				0			0	0
-34	151.25	20191213	1	2019-12-13 11:00:01	0.38	1307.17	0.42	0.02	1.51						0				0			0	0
-34	151.25	20191213	2	2019-12-13 12:00:01	0.37	1408.21	0.42	0.02	1.49						0				0			0	0
-34	151.25	20191213	3	2019-12-13 13:00:01	0.34	1863.98	0.43	0.02	1.46						0				0			0	0
-34	151.25	20191213	4	2019-12-13 14:00:01	0.32	2890.52	0.5	0.03	1.43						0				0			0	0
-34	151.25	20191213	5	2019-12-13 15:00:01	0.33	4347.76	0.63	0.04	1.42						0				0			0	0
-34	151.25	20191213	6	2019-12-13 16:00:01	0.33	5684.07	0.76	0.05	1.42						0				0			0	0
-34	151.25	20191213	7	2019-12-13 17:00:01	0.33	6331.65	0.84	0.06	1.42						0				0			0	0
-34	151.25	20191213	8	2019-12-13 18:00:01	0.33	6193.59	0.85	0.06	1.42						0				0			0	0
-34	151.25	20191213	9	2019-12-13 19:00:01	0.34	5613.69	0.79	0.05	1.42						0.01				0			0.01	0.01292
-34	151.25	20191213	10	2019-12-13 20:00:01	0.36	4791.76	0.72	0.05	1.43						0.01				0			0.01	0.01292
-34	151.25	20191213	11	2019-12-13 21:00:01	0.41	3907.63	0.66	0.04	1.45						0.01				0			0.01	0.01292
-34	151.25	20191213	12	2019-12-13 22:00:01	0.47	3088.74	0.62	0.03	1.46						0.01				0			0.01	0.01292
-34	151.25	20191213	13	2019-12-13 23:00:01	0.51	2492.91	0.57	0.03	1.47						0.01				0			0.01	0.01292
-34	151.25	20191213	14	2019-12-14 00:00:01	0.53	2094.69	0.48	0.02	1.47						0.01				0			0.01	0.01292
-34	151.25	20191213	15	2019-12-14 01:00:01	0.58	1853.63	0.42	0.02	1.46						0.01				0			0.01	0.01292
-34	151.25	20191213	16	2019-12-14 02:00:01	0.6	1705.14	0.37	0.02	1.45						0.01				0			0.01	0.01292
-34	151.25	20191213	17	2019-12-14 03:00:01	0.62	1549.87	0.33	0.02	1.44						0.01				0			0.01	0.01292
-34	151.25	20191213	18	2019-12-14 04:00:01	0.61	1401.95	0.3	0.01	1.44						0.01				0			0.01	0.01292
-34	151.25	20191213	19	2019-12-14 05:00:01	0.65	1289.54	0.27	0.01	1.44						0.01				0			0.01	0.01292
-34	151.25	20191213	20	2019-12-14 06:00:01	0.64	1226.85	0.25	0.01	1.44						0.01				0			0.01	0.01292
-34	151.25	20191213	21	2019-12-14 07:00:01	0.53	1207.7	0.24	0.01	1.45						0.01				0			0.01	0.01292
-34	151.25	20191213	22	2019-12-14 08:00:01	0.57	1225.67	0.24	0.01	1.45						0.01				0			0.01	0.01292
-34	151.25	20191213	23	2019-12-14 09:00:01	0.63	1265.72	0.21	0.01	1.44						0.04				0			0.04	0.05168
-34	151.25	20191214	0	2019-12-14 10:00:01	0.81	2636.26	0.34	0.03	1.42						0.07				0			0.07	0.09044
-34	151.25	20191214	1	2019-12-14 11:00:01	0.8	2896.29	0.35	0.03	1.41						0.06				0			0.06	0.07752
-34	151.25	20191214	2	2019-12-14 12:00:01	0.78	3953.15	0.44	0.04	1.41						0.07				0			0.07	0.09044
-34	151.25	20191214	3	2019-12-14 13:00:01	1.28	7145.74	0.76	0.07	1.41						0.09				0			0.09	0.11628
-34	151.25	20191214	4	2019-12-14 14:00:01	1.08	7831.02	0.85	0.07	1.41						0.23				0			0.23	0.29716
-34	151.25	20191214	5	2019-12-14 15:00:01	0.77	9715.75	1.07	0.09	1.41						0.07				0			0.07	0.09044
-34	151.25	20191214	6	2019-12-14 16:00:01	0.53	11242.9	1.24	0.11	1.41						0.06				0			0.06	0.07752
-34	151.25	20191214	7	2019-12-14 17:00:01	0.42	11011	1.23	0.1	1.41						0.08				0			0.08	0.10336
-34	151.25	20191214	8	2019-12-14 18:00:01	0.38	9330.87	1.09	0.09	1.41						0.05				0			0.05	0.0646
-34	151.25	20191214	9	2019-12-14 19:00:01	0.35	7015.62	0.85	0.07	1.42						0.05				0			0.05	0.0646
-34	151.25	20191214	10	2019-12-14 20:00:01	0.32	5078.32	0.64	0.05	1.42						0.05				0			0.05	0.0646
-34	151.25	20191214	11	2019-12-14 21:00:01	0.31	3864.79	0.5	0.04	1.41						0.04				0			0.04	0.05168
-34	151.25	20191214	12	2019-12-14 22:00:01	0.37	3118.5	0.44	0.03	1.42						0.03				0			0.03	0.03876
-34	151.25	20191214	13	2019-12-14 23:00:01	0.41	2661.95	0.39	0.03	1.43						0.02				0			0.02	0.02584
-34	151.25	20191214	14	2019-12-15 00:00:01	0.49	2399.01	0.37	0.02	1.44						0.01				0			0.01	0.01292
-34	151.25	20191214	15	2019-12-15 01:00:01	0.49	2163.87	0.36	0.02	1.44						0.01				0			0.01	0.01292
-34	151.25	20191214	16	2019-12-15 02:00:01	0.49	1893.63	0.33	0.02	1.44						0.01				0			0.01	0.01292
-34	151.25	20191214	17	2019-12-15 03:00:01	0.5	1660.06	0.3	0.02	1.44						0.01				0			0.01	0.01292
-34	151.25	20191214	18	2019-12-15 04:00:01	0.49	1449.65	0.27	0.02	1.45						0.01				0			0.01	0.01292
-34	151.25	20191214	19	2019-12-15 05:00:01	0.49	1267.61	0.24	0.01	1.45						0.01				0			0.01	0.01292
-34	151.25	20191214	20	2019-12-15 06:00:01	0.45	1158.51	0.21	0.01	1.44						0.02				0			0.02	0.02584
-34	151.25	20191214	21	2019-12-15 07:00:01	0.39	1071.93	0.2	0.01	1.46						0.02				0			0.02	0.02584
-34	151.25	20191214	22	2019-12-15 08:00:01	0.44	1047.44	0.2	0.01	1.46						0.03				0			0.03	0.03876
-34	151.25	20191214	23	2019-12-15 09:00:01	0.56	1222.02	0.2	0.01	1.45						0.04				0			0.04	0.05168
-34	151.25	20191215	0	2019-12-15 10:00:01	0.95	2973.26	0.38	0.03	1.42						0.06				0			0.06	0.07752
-34	151.25	20191215	1	2019-12-15 11:00:01	1.4	5847.63	0.65	0.06	1.41						0				0			0	0
-34	151.25	20191215	2	2019-12-15 12:00:01	2.47	12976.6	1.33	0.12	1.41						0				0			0	0
-34	151.25	20191215	3	2019-12-15 13:00:01	4.27	24525.4	2.44	0.23	1.41						0				0			0	0
-34	151.25	20191215	4	2019-12-15 14:00:01	5.9	36349.5	3.5	0.34	1.4						0				0			0	0
-34	151.25	20191215	5	2019-12-15 15:00:01	5.76	41907.5	3.97	0.39	1.4						0.03				0			0.03	0.03876
-34	151.25	20191215	6	2019-12-15 16:00:01	4.67	35976.4	3.35	0.34	1.4						0.04				0			0.04	0.05168
-34	151.25	20191215	7	2019-12-15 17:00:01	3.69	22916.1	2.12	0.21	1.41						0.07				0			0.07	0.09044
-34	151.25	20191215	8	2019-12-15 18:00:01	3.15	11968.2	1.13	0.11	1.41						0.11				0			0.11	0.14212
-34	151.25	20191215	9	2019-12-15 19:00:01	2.87	6828	0.67	0.06	1.41						0.3				0			0.3	0.3876
-34	151.25	20191215	10	2019-12-15 20:00:01	2.66	5096.1	0.5	0.05	1.41						0.34				0			0.34	0.43928
-34	151.25	20191215	11	2019-12-15 21:00:01	2.84	4308.32	0.41	0.04	1.41						0.67				0			0.67	0.86564
-34	151.25	20191215	12	2019-12-15 22:00:01	3.25	3616.29	0.34	0.03	1.41						2.57				0			2.57	3.32044
-34	151.25	20191215	13	2019-12-15 23:00:01	3.46	2721.37	0.25	0.03	1.41						3.22				0			3.22	4.16024
-34	151.25	20191215	14	2019-12-16 00:00:01	3.37	1917.78	0.18	0.02	1.42						1.78				0			1.78	2.29976
-34	151.25	20191215	15	2019-12-16 01:00:01	3.02	1417.53	0.13	0.01	1.42						1.08				0			1.08	1.39536
-34	151.25	20191215	16	2019-12-16 02:00:01	2.58	1136.54	0.12	0.01	1.42						0.76				0			0.76	0.98192
-34	151.25	20191215	17	2019-12-16 03:00:01	1.94	961.78	0.12	0.01	1.42						0.48				0			0.48	0.62016
-34	151.25	20191215	18	2019-12-16 04:00:01	1.22	821.69	0.15	0.01	1.45						0.26				0			0.26	0.33592
-34	151.25	20191215	19	2019-12-16 05:00:01	0.74	705.09	0.16	0.01	1.46						0.13				0			0.13	0.16796
-34	151.25	20191215	20	2019-12-16 06:00:01	0.36	617.74	0.19	0.01	1.48						0.03				0			0.03	0.03876
-34	151.25	20191215	21	2019-12-16 07:00:01	0.27	574.71	0.22	0.01	1.49						0.01				0			0.01	0.01292
-34	151.25	20191215	22	2019-12-16 08:00:01	0.24	559.77	0.22	0.01	1.48						0				0			0	0
-34	151.25	20191215	23	2019-12-16 09:00:01	0.21	568.98	0.22	0.01	1.47						0				0			0	0
-34	151.25	20191216	0	2019-12-16 10:00:01	0.23	1053.8	0.3	0.01	1.44						0				0			0	0
-34	151.25	20191216	1	2019-12-16 11:00:01	0.23	1571.96	0.35	0.02	1.43						0				0			0	0
-34	151.25	20191216	2	2019-12-16 12:00:01	0.22	2524.49	0.41	0.02	1.41						0.01				0			0.01	0.01292
-34	151.25	20191216	3	2019-12-16 13:00:01	1.41	6397.05	0.87	0.06	1.41						0.01				0			0.01	0.01292
-34	151.25	20191216	4	2019-12-16 14:00:01	0.75	5291.03	0.64	0.05	1.41						0				0			0	0
-34	151.25	20191216	5	2019-12-16 15:00:01	0.33	5166.55	0.58	0.05	1.4						0				0			0	0
-34	151.25	20191216	6	2019-12-16 16:00:01	0.15	4933.99	0.54	0.05	1.4						0				0			0	0
-34	151.25	20191216	7	2019-12-16 17:00:01	0.1	4196.08	0.47	0.04	1.4						0				0			0	0
-34	151.25	20191216	8	2019-12-16 18:00:01	0.08	3455.67	0.4	0.03	1.4						0				0			0	0
-34	151.25	20191216	9	2019-12-16 19:00:01	0.09	2738.1	0.33	0.03	1.4						0				0			0	0
-34	151.25	20191216	10	2019-12-16 20:00:01	0.1	2026.53	0.26	0.02	1.4						0				0			0	0
-34	151.25	20191216	11	2019-12-16 21:00:01	0.11	1486.52	0.2	0.01	1.4						0				0			0	0
-34	151.25	20191216	12	2019-12-16 22:00:01	0.11	1121.99	0.16	0.01	1.41						0				0			0	0
-34	151.25	20191216	13	2019-12-16 23:00:01	0.11	894	0.14	0.01	1.42						0				0			0	0
-34	151.25	20191216	14	2019-12-17 00:00:01	0.12	772.24	0.13	0.01	1.43						0				0			0	0
-34	151.25	20191216	15	2019-12-17 01:00:01	0.13	722.79	0.12	0.01	1.44						0				0			0	0
-34	151.25	20191216	16	2019-12-17 02:00:01	0.14	728.12	0.12	0.01	1.44						0.02				0			0.02	0.02584
-34	151.25	20191216	17	2019-12-17 03:00:01	0.15	773.32	0.12	0.01	1.44						0.05				0			0.05	0.0646
-34	151.25	20191216	18	2019-12-17 04:00:01	0.16	826.43	0.12	0.01	1.42						0.09				0			0.09	0.11628
-34	151.25	20191216	19	2019-12-17 05:00:01	0.17	868.77	0.11	0.01	1.41						0.16				0			0.16	0.20672
-34	151.25	20191216	20	2019-12-17 06:00:01	0.16	897.32	0.11	0.01	1.41						0.24				0			0.24	0.31008
-34	151.25	20191216	21	2019-12-17 07:00:01	0.15	921.44	0.1	0.01	1.41						0.2				0			0.2	0.2584
-34	151.25	20191216	22	2019-12-17 08:00:01	0.14	947.71	0.1	0.01	1.4						0.1				0			0.1	0.1292
-34	151.25	20191216	23	2019-12-17 09:00:01	0.13	974.2	0.1	0.01	1.4						0.04				0			0.04	0.05168
-34	151.25	20191217	0	2019-12-17 10:00:01	0.94	3269.68	0.3	0.03	1.4						0.01				0			0.01	0.01292
-34	151.25	20191217	1	2019-12-17 11:00:01	0.84	3108.45	0.28	0.03	1.4						0				0			0	0
-34	151.25	20191217	2	2019-12-17 12:00:01	0.7	2758.62	0.25	0.03	1.4						0				0			0	0
-34	151.25	20191217	3	2019-12-17 13:00:01	1.86	6578.78	0.56	0.06	1.4						0				0			0	0
-34	151.25	20191217	4	2019-12-17 14:00:01	1.58	5595.54	0.47	0.05	1.4						0.01				0			0.01	0.01292
-34	151.25	20191217	5	2019-12-17 15:00:01	1.34	4962.62	0.41	0.05	1.4						0				0			0	0
-34	151.25	20191217	6	2019-12-17 16:00:01	1.17	4569.92	0.37	0.04	1.4						0				0			0	0
-34	151.25	20191217	7	2019-12-17 17:00:01	1.04	4391.49	0.35	0.04	1.4						0				0			0	0
-34	151.25	20191217	8	2019-12-17 18:00:01	0.96	4229.83	0.33	0.04	1.4						0				0			0	0
-34	151.25	20191217	9	2019-12-17 19:00:01	0.93	3950.7	0.31	0.04	1.41						0				0			0	0
-34	151.25	20191217	10	2019-12-17 20:00:01	0.93	3626.58	0.3	0.03	1.42						0				0			0	0
-34	151.25	20191217	11	2019-12-17 21:00:01	0.96	3312.04	0.28	0.03	1.41						0				0			0	0
-34	151.25	20191217	12	2019-12-17 22:00:01	1.03	3068.39	0.27	0.03	1.41						0				0			0	0
-34	151.25	20191217	13	2019-12-17 23:00:01	1.14	3000.69	0.27	0.03	1.42						0				0			0	0
-34	151.25	20191217	14	2019-12-18 00:00:01	1.27	3172.15	0.29	0.03	1.42						0				0			0	0
-34	151.25	20191217	15	2019-12-18 01:00:01	1.38	3515.88	0.31	0.03	1.41						0.01				0			0.01	0.01292
-34	151.25	20191217	16	2019-12-18 02:00:01	1.42	3962.53	0.33	0.04	1.4						0.07				0			0.07	0.09044
-34	151.25	20191217	17	2019-12-18 03:00:02	1.51	4528.75	0.37	0.04	1.4						0.21				0			0.21	0.27132
-34	151.25	20191217	18	2019-12-18 04:00:02	1.62	5117.85	0.41	0.05	1.4						0.33				0			0.33	0.42636
-34	151.25	20191217	19	2019-12-18 05:00:02	1.72	5430.36	0.44	0.05	1.41						0.36				0			0.36	0.46512
-34	151.25	20191217	20	2019-12-18 06:00:02	1.68	5492.1	0.45	0.05	1.41						0.35				0			0.35	0.4522
-34	151.25	20191217	21	2019-12-18 07:00:02	1.45	5533.94	0.45	0.05	1.41						0.24				0			0.24	0.31008
-34	151.25	20191217	22	2019-12-18 08:00:02	1.27	5672.12	0.46	0.05	1.41						0.15				0			0.15	0.1938
-34	151.25	20191217	23	2019-12-18 09:00:02	1.1	5810.01	0.45	0.05	1.41						0.13				0			0.13	0.16796
-34	151.25	20191218	0	2019-12-18 10:00:02	0.9	5490.69	0.42	0.05	1.41						0.12				0			0.12	0.15504
-34	151.25	20191218	1	2019-12-18 11:00:02	0.77	5491.03	0.41	0.05	1.41						0.08				0			0.08	0.10336
-34	151.25	20191218	2	2019-12-18 12:00:02	0.68	5753.56	0.42	0.05	1.41						0.02				0			0.02	0.02584
-34	151.25	20191218	3	2019-12-18 13:00:02	7.46	19178.9	1.51	0.18	1.4						0.01				0			0.01	0.01292
-34	151.25	20191218	4	2019-12-18 14:00:02	6.1	18986.7	1.48	0.18	1.4						0.01				0			0.01	0.01292
-34	151.25	20191218	5	2019-12-18 15:00:02	3.91	18988	1.48	0.18	1.4						0.01				0			0.01	0.01292
-34	151.25	20191218	6	2019-12-18 16:00:02	1.96	20351.7	1.6	0.19	1.4						0.01				0			0.01	0.01292
-34	151.25	20191218	7	2019-12-18 17:00:02	1.03	22609.3	1.82	0.21	1.4						0.02				0			0.02	0.02584
-34	151.25	20191218	8	2019-12-18 18:00:02	0.85	24159.2	2	0.22	1.4						0.01				0			0.01	0.01292
-34	151.25	20191218	9	2019-12-18 19:00:02	0.87	24584	2.07	0.23	1.4						0				0			0	0
-34	151.25	20191218	10	2019-12-18 20:00:02	0.89	25545.3	2.15	0.24	1.4						0				0			0	0
-34	151.25	20191218	11	2019-12-18 21:00:02	0.93	26931.3	2.26	0.25	1.4						0.02				0			0.02	0.02584
-34	151.25	20191218	12	2019-12-18 22:00:02	1.11	27795.9	2.33	0.26	1.4						0.08				0			0.08	0.10336
-34	151.25	20191218	13	2019-12-18 23:00:02	2.02	27632.2	2.32	0.26	1.4						0.21				0			0.21	0.27132
-34	151.25	20191218	14	2019-12-19 00:00:02	4.85	26586.2	2.24	0.25	1.4						0.58				0			0.58	0.74936
-34	151.25	20191218	15	2019-12-19 01:00:02	10.32	25066.4	2.13	0.23	1.4						0.96				0			0.96	1.24032
-34	151.25	20191218	16	2019-12-19 02:00:02	16.95	23138.6	1.97	0.22	1.4						1.27				0			1.27	1.64084
-34	151.25	20191218	17	2019-12-19 03:00:02	21.94	21001.1	1.78	0.2	1.4						1.68				0			1.68	2.17056
-34	151.25	20191218	18	2019-12-19 04:00:02	25.71	19152.7	1.61	0.18	1.4						2.48				0			2.48	3.20416
-34	151.25	20191218	19	2019-12-19 05:00:02	28.67	17857.2	1.49	0.17	1.4						3.24				0			3.24	4.18608
-34	151.25	20191218	20	2019-12-19 06:00:02	30.72	16909.7	1.38	0.16	1.4						3.48				0			3.48	4.49616
-34	151.25	20191218	21	2019-12-19 07:00:02	30.17	15731.6	1.25	0.15	1.4						3.71				0			3.71	4.79332
-34	151.25	20191218	22	2019-12-19 08:00:02	27.12	14234.8	1.1	0.13	1.4						3.52				0			3.52	4.54784
-34	151.25	20191218	23	2019-12-19 09:00:02	19.58	13092.7	0.99	0.12	1.4						2.78				0			2.78	3.59176
-34	151.25	20191219	0	2019-12-19 10:00:02	8.33	12848.4	1	0.12	1.4						2.25				0			2.25	2.907
-34	151.25	20191219	1	2019-12-19 11:00:02	5.96	14878.7	1.19	0.14	1.41						1.22				0			1.22	1.57624
-34	151.25	20191219	2	2019-12-19 12:00:02	6.41	19602.7	1.63	0.18	1.41						0.97				0			0.97	1.25324
-34	151.25	20191219	3	2019-12-19 13:00:02	3.02	11069.7	1.01	0.11	1.42						1.18				0			1.18	1.52456
-34	151.25	20191219	4	2019-12-19 14:00:02	3.33	12664.2	1.29	0.12	1.42						1.84				0			1.84	2.37728
-34	151.25	20191219	5	2019-12-19 15:00:02	3.79	14932.9	1.55	0.14	1.41						2.31				0			2.31	2.98452
-34	151.25	20191219	6	2019-12-19 16:00:02	3.18	16762	1.64	0.16	1.41						2.29				0			2.29	2.95868
-34	151.25	20191219	7	2019-12-19 17:00:02	1.93	17253.7	1.61	0.16	1.4						2.22				0			2.22	2.86824
-34	151.25	20191219	8	2019-12-19 18:00:02	0.93	15756.2	1.45	0.15	1.4						1.11				0			1.11	1.43412
-34	151.25	20191219	9	2019-12-19 19:00:02	0.54	13469	1.24	0.13	1.4						0.59				0			0.59	0.76228
-34	151.25	20191219	10	2019-12-19 20:00:02	0.44	11669.8	1.09	0.11	1.4						0.38				0			0.38	0.49096
-34	151.25	20191219	11	2019-12-19 21:00:02	0.43	10440.8	1	0.1	1.4						0.34				0			0.34	0.43928
-34	151.25	20191219	12	2019-12-19 22:00:02	0.44	9636.64	0.95	0.09	1.4						0.42				0			0.42	0.54264
-34	151.25	20191219	13	2019-12-19 23:00:02	0.47	8937.08	0.89	0.08	1.4						1.14				0			1.14	1.47288
-34	151.25	20191219	14	2019-12-20 00:00:02	0.56	8081.27	0.81	0.08	1.4						2.69				0			2.69	3.47548
-34	151.25	20191219	15	2019-12-20 01:00:02	0.71	7156.5	0.72	0.07	1.41						3.12				0			3.12	4.03104
-34	151.25	20191219	16	2019-12-20 02:00:02	0.83	6363.76	0.66	0.06	1.41						2.66				0			2.66	3.43672
-34	151.25	20191219	17	2019-12-20 03:00:02	0.86	5772.17	0.61	0.05	1.41						2.11				0			2.11	2.72612
-34	151.25	20191219	18	2019-12-20 04:00:02	0.75	5282.99	0.57	0.05	1.41						1.58				0			1.58	2.04136
-34	151.25	20191219	19	2019-12-20 05:00:02	0.57	4795.62	0.52	0.05	1.41						1.23				0			1.23	1.58916
-34	151.25	20191219	20	2019-12-20 06:00:02	0.36	4311.98	0.46	0.04	1.41						0.93				0			0.93	1.20156
-34	151.25	20191219	21	2019-12-20 07:00:02	0.26	3898.9	0.41	0.04	1.41						0.68				0			0.68	0.87856
-34	151.25	20191219	22	2019-12-20 08:00:02	0.23	3537.19	0.36	0.03	1.41						0.5				0			0.5	0.646
-34	151.25	20191219	23	2019-12-20 09:00:02	0.21	3243.03	0.33	0.03	1.41						0.32				0			0.32	0.41344
-34	151.25	20191220	0	2019-12-20 10:00:02	0.39	3977.67	0.39	0.04	1.41						0.19				0			0.19	0.24548
-34	151.25	20191220	1	2019-12-20 11:00:02	0.28	3507.71	0.35	0.03	1.41						0.13				0			0.13	0.16796
-34	151.25	20191220	2	2019-12-20 12:00:02	0.23	4090.69	0.4	0.04	1.41						0.1				0			0.1	0.1292
-34	151.25	20191220	3	2019-12-20 13:00:02	1.44	10081.6	0.89	0.09	1.4						0.08				0			0.08	0.10336
-34	151.25	20191220	4	2019-12-20 14:00:02	0.84	10324.9	0.9	0.1	1.4						0.09				0			0.09	0.11628
-34	151.25	20191220	5	2019-12-20 15:00:02	0.51	11602.7	1	0.11	1.4						0.09				0			0.09	0.11628
-34	151.25	20191220	6	2019-12-20 16:00:02	0.47	12248.8	1.05	0.11	1.4						0.08				0			0.08	0.10336
-34	151.25	20191220	7	2019-12-20 17:00:02	0.51	11739	1	0.11	1.4						0.06				0			0.06	0.07752
-34	151.25	20191220	8	2019-12-20 18:00:02	0.61	11074.5	0.95	0.1	1.4						0.07				0			0.07	0.09044
-34	151.25	20191220	9	2019-12-20 19:00:02	0.73	10944.5	0.94	0.1	1.4						0.07				0			0.07	0.09044
-34	151.25	20191220	10	2019-12-20 20:00:02	0.85	11167.2	0.96	0.1	1.4						0.08				0			0.08	0.10336
-34	151.25	20191220	11	2019-12-20 21:00:02	0.95	11380.1	0.98	0.11	1.4						0.09				0			0.09	0.11628
-34	151.25	20191220	12	2019-12-20 22:00:02	1.03	11523.5	0.99	0.11	1.4						0.09				0			0.09	0.11628
-34	151.25	20191220	13	2019-12-20 23:00:02	1.11	11668.5	1	0.11	1.4						0.1				0			0.1	0.1292
-34	151.25	20191220	14	2019-12-21 00:00:02	1.21	11877.3	1.02	0.11	1.4						0.13				0			0.13	0.16796
-34	151.25	20191220	15	2019-12-21 01:00:02	1.29	12105.8	1.05	0.11	1.4						0.19				0			0.19	0.24548
-34	151.25	20191220	16	2019-12-21 02:00:02	1.37	12226.5	1.08	0.11	1.41						0.26				0			0.26	0.33592
-34	151.25	20191220	17	2019-12-21 03:00:02	1.45	12154.1	1.09	0.11	1.41						0.38				0			0.38	0.49096
-34	151.25	20191220	18	2019-12-21 04:00:02	1.54	11859.4	1.07	0.11	1.41						0.49				0			0.49	0.63308
-34	151.25	20191220	19	2019-12-21 05:00:02	1.65	11307.8	1.04	0.11	1.41						0.56				0			0.56	0.72352
-34	151.25	20191220	20	2019-12-21 06:00:02	1.54	10548.5	0.98	0.1	1.41						0.63				0			0.63	0.81396
-34	151.25	20191220	21	2019-12-21 07:00:02	1.36	9490.55	0.88	0.09	1.41						0.77				0			0.77	0.99484
-34	151.25	20191220	22	2019-12-21 08:00:02	1.55	8410.73	0.78	0.08	1.4						1.01				0			1.01	1.30492
-34	151.25	20191220	23	2019-12-21 09:00:02	2.06	7937.83	0.72	0.07	1.4						1.17				0			1.17	1.51164
-34	151.25	20191221	0	2019-12-21 10:00:02	2.03	10816.5	0.99	0.1	1.4						1.17				0			1.17	1.51164
-34	151.25	20191221	1	2019-12-21 11:00:02	4.01	17558.6	1.51	0.16	1.4						1.08				0			1.08	1.39536
-34	151.25	20191221	2	2019-12-21 12:00:02	8.01	35768.4	2.92	0.33	1.4						0.99				0			0.99	1.27908
-34	151.25	20191221	3	2019-12-21 13:00:02	4.15	19841.1	1.73	0.18	1.4						1.06				0			1.06	1.36952
-34	151.25	20191221	4	2019-12-21 14:00:02	5.65	29750.5	2.61	0.28	1.4						1.08				0			1.08	1.39536
-34	151.25	20191221	5	2019-12-21 15:00:02	6.56	48073.1	4.28	0.45	1.4						1.21				0			1.21	1.56332
-34	151.25	20191221	6	2019-12-21 16:00:02	4.55	59322	5.54	0.56	1.41						1.16				0			1.16	1.49872
-34	151.25	20191221	7	2019-12-21 17:00:02	1.62	54718.1	5.33	0.51	1.41						1.17				0			1.17	1.51164
-34	151.25	20191221	8	2019-12-21 18:00:02	0.89	38850	3.72	0.36	1.41						1.09				0			1.09	1.40828
-34	151.25	20191221	9	2019-12-21 19:00:02	0.63	24131.1	2.32	0.23	1.4						1.01				0			1.01	1.30492
-34	151.25	20191221	10	2019-12-21 20:00:02	0.38	17397.8	1.7	0.16	1.4						1.15				0			1.15	1.4858
-34	151.25	20191221	11	2019-12-21 21:00:02	0.22	12480.5	1.3	0.12	1.4						1.38				0			1.38	1.78296
-34	151.25	20191221	12	2019-12-21 22:00:02	0.14	8044.33	0.92	0.08	1.41						1.81				0			1.81	2.33852
-34	151.25	20191221	13	2019-12-21 23:00:02	0.1	5362.11	0.66	0.05	1.41						1.21				0			1.21	1.56332
-34	151.25	20191221	14	2019-12-22 00:00:02	0.09	4052.19	0.53	0.04	1.41						0.85				0			0.85	1.0982
-34	151.25	20191221	15	2019-12-22 01:00:02	0.09	3483.35	0.49	0.03	1.42						0.85				0			0.85	1.0982
-34	151.25	20191221	16	2019-12-22 02:00:02	0.12	3218.24	0.46	0.03	1.43						0.77				0			0.77	0.99484
-34	151.25	20191221	17	2019-12-22 03:00:02	0.16	3052.09	0.43	0.03	1.42						1.01				0			1.01	1.30492
-34	151.25	20191221	18	2019-12-22 04:00:02	0.22	2911.25	0.39	0.03	1.41						1.19				0			1.19	1.53748
-34	151.25	20191221	19	2019-12-22 05:00:02	0.26	2744.19	0.36	0.03	1.41						0.9				0			0.9	1.1628
-34	151.25	20191221	20	2019-12-22 06:00:02	0.3	2525.95	0.35	0.02	1.42						0.27				0			0.27	0.34884
-34	151.25	20191221	21	2019-12-22 07:00:02	0.32	2501.72	0.35	0.02	1.42						0.28				0			0.28	0.36176
-34	151.25	20191221	22	2019-12-22 08:00:02	0.34	2917.57	0.41	0.03	1.43						0.31				0			0.31	0.40052
-34	151.25	20191221	23	2019-12-22 09:00:02	0.35	3318.75	0.49	0.03	1.45						0.33				0			0.33	0.42636
-34	151.25	20191222	0	2019-12-22 10:00:02	0.59	4101.18	0.6	0.04	1.44						0.28				0			0.28	0.36176
-34	151.25	20191222	1	2019-12-22 11:00:02	0.63	4907.8	0.71	0.05	1.43						0.14				0			0.14	0.18088
-34	151.25	20191222	2	2019-12-22 12:00:02	0.61	7169.54	0.91	0.07	1.42						0.07				0			0.07	0.09044
-34	151.25	20191222	3	2019-12-22 13:00:02	0.67	9647.92	1.11	0.09	1.42						0.07				0			0.07	0.09044
-34	151.25	20191222	4	2019-12-22 14:00:02	0.56	9222.23	1.01	0.09	1.41						0.08				0			0.08	0.10336
-34	151.25	20191222	5	2019-12-22 15:00:02	0.43	8752.2	0.92	0.08	1.41						0.06				0			0.06	0.07752
-34	151.25	20191222	6	2019-12-22 16:00:02	0.58	9200.67	0.93	0.09	1.41						0.04				0			0.04	0.05168
-34	151.25	20191222	7	2019-12-22 17:00:02	0.42	9496.02	0.92	0.09	1.41						0.02				0			0.02	0.02584
-34	151.25	20191222	8	2019-12-22 18:00:02	0.34	10259.9	0.97	0.1	1.41						0.01				0			0.01	0.01292
-34	151.25	20191222	9	2019-12-22 19:00:02	0.32	10293.5	0.99	0.1	1.41						0				0			0	0
-34	151.25	20191222	10	2019-12-22 20:00:02	0.36	9570.29	0.97	0.09	1.41						0				0			0	0
-34	151.25	20191222	11	2019-12-22 21:00:02	0.42	8337.27	0.88	0.08	1.42						0				0			0	0
-34	151.25	20191222	12	2019-12-22 22:00:02	0.49	7039.78	0.79	0.07	1.42						0				0			0	0
-34	151.25	20191222	13	2019-12-22 23:00:02	0.57	6088.48	0.67	0.06	1.42						0				0			0	0
-34	151.25	20191222	14	2019-12-23 00:00:02	0.65	6105.15	0.7	0.06	1.42						0				0			0	0
-34	151.25	20191222	15	2019-12-23 01:00:02	0.73	6589.49	0.77	0.06	1.42						0				0			0	0
-34	151.25	20191222	16	2019-12-23 02:00:02	0.78	6902.75	0.8	0.07	1.42						0				0			0	0
-34	151.25	20191222	17	2019-12-23 03:00:02	0.76	6942.6	0.84	0.07	1.42						0				0			0	0
-34	151.25	20191222	18	2019-12-23 04:00:02	0.71	6569.08	0.82	0.06	1.43						0				0			0	0
-34	151.25	20191222	19	2019-12-23 05:00:02	0.68	5894.48	0.76	0.06	1.43						0				0			0	0
-34	151.25	20191222	20	2019-12-23 06:00:02	0.65	5294.32	0.69	0.05	1.43						0				0			0	0
-34	151.25	20191222	21	2019-12-23 07:00:02	0.59	4945.4	0.64	0.05	1.42						0.01				0			0.01	0.01292
-34	151.25	20191222	22	2019-12-23 08:00:02	0.54	4708.55	0.62	0.05	1.42						0.01				0			0.01	0.01292
-34	151.25	20191222	23	2019-12-23 09:00:02	0.52	4489.04	0.6	0.04	1.42						0.02				0			0.02	0.02584
-34	151.25	20191223	0	2019-12-23 10:00:02	1.15	6867.91	0.89	0.07	1.43						0.04				0			0.04	0.05168
-34	151.25	20191223	1	2019-12-23 11:00:02	1.01	6365.74	0.84	0.06	1.43						0.08				0			0.08	0.10336
-34	151.25	20191223	2	2019-12-23 12:00:02	0.87	6417.92	0.83	0.06	1.42						0.11				0			0.11	0.14212
-34	151.25	20191223	3	2019-12-23 13:00:02	0.77	4510.82	0.61	0.04	1.42						0.12				0			0.12	0.15504
-34	151.25	20191223	4	2019-12-23 14:00:02	0.72	4933.75	0.64	0.05	1.42						0.16				0			0.16	0.20672
-34	151.25	20191223	5	2019-12-23 15:00:02	0.61	6035.59	0.71	0.06	1.41						0.15				0			0.15	0.1938
-34	151.25	20191223	6	2019-12-23 16:00:02	0.52	7659.12	0.83	0.07	1.41						0.15				0			0.15	0.1938
-34	151.25	20191223	7	2019-12-23 17:00:02	0.47	9434.04	0.99	0.09	1.41						0.16				0			0.16	0.20672
-34	151.25	20191223	8	2019-12-23 18:00:02	0.44	10842.8	1.13	0.1	1.41						0.13				0			0.13	0.16796
-34	151.25	20191223	9	2019-12-23 19:00:02	0.44	11647	1.23	0.11	1.41						0.13				0			0.13	0.16796
-34	151.25	20191223	10	2019-12-23 20:00:02	0.44	12049.5	1.3	0.11	1.41						0.12				0			0.12	0.15504
-34	151.25	20191223	11	2019-12-23 21:00:02	0.43	12254	1.35	0.12	1.41						0.09				0			0.09	0.11628
-34	151.25	20191223	12	2019-12-23 22:00:02	0.43	12242	1.39	0.12	1.41						0.06				0			0.06	0.07752
-34	151.25	20191223	13	2019-12-23 23:00:02	0.46	11958.2	1.4	0.11	1.41						0.05				0			0.05	0.0646
-34	151.25	20191223	14	2019-12-24 00:00:02	0.48	11477.2	1.41	0.11	1.42						0.04				0			0.04	0.05168
-34	151.25	20191223	15	2019-12-24 01:00:02	0.51	10996.7	1.4	0.11	1.42						0.04				0			0.04	0.05168
-34	151.25	20191223	16	2019-12-24 02:00:02	0.52	10538.5	1.35	0.1	1.42						0.03				0			0.03	0.03876
-34	151.25	20191223	17	2019-12-24 03:00:02	0.53	10221.9	1.34	0.1	1.42						0.03				0			0.03	0.03876
-34	151.25	20191223	18	2019-12-24 04:00:02	0.54	9841.9	1.35	0.1	1.43						0.02				0			0.02	0.02584
-34	151.25	20191223	19	2019-12-24 05:00:02	0.55	9298.03	1.39	0.09	1.43						0				0			0	0
-34	151.25	20191223	20	2019-12-24 06:00:02	0.54	8757.97	1.41	0.09	1.44						0				0			0	0
-34	151.25	20191223	21	2019-12-24 07:00:02	0.57	8336.86	1.44	0.08	1.44						0				0			0	0
-34	151.25	20191223	22	2019-12-24 08:00:02	0.56	7864.05	1.37	0.08	1.44						0				0			0	0
-34	151.25	20191223	23	2019-12-24 09:00:02	0.62	7289.1	1.33	0.07	1.45						0				0			0	0
-34	151.25	20191224	0	2019-12-24 10:00:02	0.45	9917.6	1.35	0.1	1.42						0.01				0			0.01	0.01292
-34	151.25	20191224	1	2019-12-24 11:00:02	0.5	9191.77	1.25	0.09	1.42						0.02				0			0.02	0.02584
-34	151.25	20191224	2	2019-12-24 12:00:02	0.48	8230.89	1.11	0.08	1.42						0.07				0			0.07	0.09044
-34	151.25	20191224	3	2019-12-24 13:00:02	0.47	6668.7	0.96	0.07	1.42						0.07				0			0.07	0.09044
-34	151.25	20191224	4	2019-12-24 14:00:02	0.47	6190.26	0.93	0.06	1.43						0.04				0			0.04	0.05168
-34	151.25	20191224	5	2019-12-24 15:00:02	0.52	5855.42	0.91	0.06	1.43						0.01				0			0.01	0.01292
-34	151.25	20191224	6	2019-12-24 16:00:02	0.6	5646.57	0.9	0.06	1.43						0				0			0	0
-34	151.25	20191224	7	2019-12-24 17:00:02	0.68	5519.75	0.91	0.06	1.44						0				0			0	0
-34	151.25	20191224	8	2019-12-24 18:00:02	0.78	5434.28	0.86	0.05	1.43						0				0			0	0
-34	151.25	20191224	9	2019-12-24 19:00:02	0.8	5350.74	0.82	0.05	1.43						0				0			0	0
-34	151.25	20191224	10	2019-12-24 20:00:02	0.73	5184.57	0.77	0.05	1.43						0				0			0	0
-34	151.25	20191224	11	2019-12-24 21:00:02	0.56	4851.22	0.69	0.05	1.42						0				0			0	0
-34	151.25	20191224	12	2019-12-24 22:00:02	0.5	4437.91	0.62	0.04	1.42						0				0			0	0
-34	151.25	20191224	13	2019-12-24 23:00:02	0.48	4082.33	0.57	0.04	1.42						0				0			0	0
-34	151.25	20191224	14	2019-12-25 00:00:02	0.48	3788.12	0.55	0.04	1.43						0				0			0	0
-34	151.25	20191224	15	2019-12-25 01:00:02	0.47	3596.23	0.55	0.04	1.43						0				0			0	0
-34	151.25	20191224	16	2019-12-25 02:00:02	0.49	3474.92	0.53	0.04	1.43						0				0			0	0
-34	151.25	20191224	17	2019-12-25 03:00:02	0.52	3444.01	0.53	0.03	1.43						0				0			0	0
-34	151.25	20191224	18	2019-12-25 04:00:02	0.54	3461.56	0.53	0.03	1.43						0				0			0	0
-34	151.25	20191224	19	2019-12-25 05:00:02	0.56	3493.63	0.51	0.03	1.43						0				0			0	0
-34	151.25	20191224	20	2019-12-25 06:00:02	0.52	3502.49	0.5	0.03	1.43						0				0			0	0
-34	151.25	20191224	21	2019-12-25 07:00:02	0.47	3511.01	0.52	0.03	1.43						0				0			0	0
-34	151.25	20191224	22	2019-12-25 08:00:02	0.45	3516.63	0.54	0.03	1.43						0				0			0	0
-34	151.25	20191224	23	2019-12-25 09:00:02	0.45	3518.1	0.54	0.03	1.43						0				0			0	0
-34	151.25	20191225	0	2019-12-25 10:00:02	0.44	2950.65	0.47	0.03	1.43						0				0			0	0
-34	151.25	20191225	1	2019-12-25 11:00:02	0.45	2962.16	0.47	0.03	1.43						0				0			0	0
-34	151.25	20191225	2	2019-12-25 12:00:02	0.43	2968.36	0.46	0.03	1.43						0				0			0	0
-34	151.25	20191225	3	2019-12-25 13:00:02	0.44	3038.07	0.46	0.03	1.43						0				0			0	0
-34	151.25	20191225	4	2019-12-25 14:00:02	0.45	3024.55	0.44	0.03	1.42						0				0			0	0
-34	151.25	20191225	5	2019-12-25 15:00:02	0.46	3116.67	0.43	0.03	1.41						0				0			0	0
-34	151.25	20191225	6	2019-12-25 16:00:02	0.47	3354.43	0.44	0.03	1.41						0				0			0	0
-34	151.25	20191225	7	2019-12-25 17:00:02	0.46	3740.75	0.48	0.04	1.41						0				0			0	0
-34	151.25	20191225	8	2019-12-25 18:00:02	0.44	4165.96	0.53	0.04	1.41						0				0			0	0
-34	151.25	20191225	9	2019-12-25 19:00:02	0.4	4460.16	0.56	0.04	1.41						0				0			0	0
-34	151.25	20191225	10	2019-12-25 20:00:02	0.35	4546.02	0.56	0.04	1.41						0				0			0	0
-34	151.25	20191225	11	2019-12-25 21:00:02	0.32	4527.58	0.55	0.04	1.41						0				0			0	0
-34	151.25	20191225	12	2019-12-25 22:00:02	0.3	4519.91	0.56	0.04	1.41						0				0			0	0
-34	151.25	20191225	13	2019-12-25 23:00:02	0.31	4529.19	0.59	0.04	1.41						0				0			0	0
-34	151.25	20191225	14	2019-12-26 00:00:02	0.34	4540.56	0.62	0.04	1.42						0				0			0	0
-34	151.25	20191225	15	2019-12-26 01:00:02	0.37	4555.85	0.63	0.04	1.42						0				0			0	0
-34	151.25	20191225	16	2019-12-26 02:00:02	0.39	4548.77	0.62	0.04	1.42						0				0			0	0
-34	151.25	20191225	17	2019-12-26 03:00:02	0.42	4515.9	0.6	0.04	1.42						0				0			0	0
-34	151.25	20191225	18	2019-12-26 04:00:02	0.45	4488.28	0.58	0.04	1.41						0				0			0	0
-34	151.25	20191225	19	2019-12-26 05:00:02	0.48	4485.03	0.58	0.04	1.41						0				0			0	0
-34	151.25	20191225	20	2019-12-26 06:00:02	0.38	4477.22	0.58	0.04	1.41						0				0			0	0
-34	151.25	20191225	21	2019-12-26 07:00:02	0.3	4447.67	0.57	0.04	1.41						0.01				0			0.01	0.01292
-34	151.25	20191225	22	2019-12-26 08:00:02	0.29	4438.15	0.56	0.04	1.41						0				0			0	0
-34	151.25	20191225	23	2019-12-26 09:00:02	0.31	4444.42	0.55	0.04	1.41						0				0			0	0
-34	151.25	20191226	0	2019-12-26 10:00:02	0.33	5090.43	0.61	0.05	1.41						0				0			0	0
-34	151.25	20191226	1	2019-12-26 11:00:03	0.31	5107.54	0.6	0.05	1.4						0.01				0			0.01	0.01292
-34	151.25	20191226	2	2019-12-26 12:00:03	0.26	5230.36	0.6	0.05	1.4						0.01				0			0.01	0.01292
-34	151.25	20191226	3	2019-12-26 13:00:03	0.4	7477.54	0.83	0.07	1.4						0.02				0			0.02	0.02584
-34	151.25	20191226	4	2019-12-26 14:00:03	0.4	7545.49	0.82	0.07	1.4						0.02				0			0.02	0.02584
-34	151.25	20191226	5	2019-12-26 15:00:03	0.53	8144.31	0.88	0.08	1.4						0.01				0			0.01	0.01292
-34	151.25	20191226	6	2019-12-26 16:00:03	0.69	9005.82	0.96	0.08	1.4						0.01				0			0.01	0.01292
-34	151.25	20191226	7	2019-12-26 17:00:03	0.69	9774.41	1.04	0.09	1.4						0				0			0	0
-34	151.25	20191226	8	2019-12-26 18:00:03	0.57	10136.3	1.08	0.09	1.4						0				0			0	0
-34	151.25	20191226	9	2019-12-26 19:00:03	0.45	10240.6	1.1	0.1	1.4						0				0			0	0
-34	151.25	20191226	10	2019-12-26 20:00:03	0.36	10326.3	1.12	0.1	1.4						0				0			0	0
-34	151.25	20191226	11	2019-12-26 21:00:03	0.29	10318.8	1.14	0.1	1.4						0				0			0	0
-34	151.25	20191226	12	2019-12-26 22:00:03	0.27	10088.1	1.14	0.09	1.4						0				0			0	0
-34	151.25	20191226	13	2019-12-26 23:00:03	0.27	9577.74	1.1	0.09	1.4						0				0			0	0
-34	151.25	20191226	14	2019-12-27 00:00:03	0.29	8802.86	1.02	0.08	1.4						0				0			0	0
-34	151.25	20191226	15	2019-12-27 01:00:03	0.31	7897.69	0.91	0.07	1.4						0				0			0	0
-34	151.25	20191226	16	2019-12-27 02:00:03	0.34	7130.03	0.81	0.07	1.4						0				0			0	0
-34	151.25	20191226	17	2019-12-27 03:00:03	0.37	6517.31	0.73	0.06	1.4						0				0			0	0
-34	151.25	20191226	18	2019-12-27 04:00:03	0.4	6073.8	0.66	0.06	1.4						0.01				0			0.01	0.01292
-34	151.25	20191226	19	2019-12-27 05:00:03	0.42	5812.84	0.62	0.05	1.4						0.01				0			0.01	0.01292
-34	151.25	20191226	20	2019-12-27 06:00:03	0.31	5623.08	0.59	0.05	1.4						0.01				0			0.01	0.01292
-34	151.25	20191226	21	2019-12-27 07:00:03	0.19	5488.73	0.57	0.05	1.4						0.01				0			0.01	0.01292
-34	151.25	20191226	22	2019-12-27 08:00:03	0.16	5439.04	0.57	0.05	1.4						0				0			0	0
-34	151.25	20191226	23	2019-12-27 09:00:03	0.16	5464.21	0.57	0.05	1.4						0				0			0	0
-34	151.25	20191227	0	2019-12-27 10:00:03	0.38	8848.71	0.92	0.08	1.4						0				0			0	0
-34	151.25	20191227	1	2019-12-27 11:00:03	0.59	9090.89	0.94	0.08	1.4						0				0			0	0
-34	151.25	20191227	2	2019-12-27 12:00:03	0.67	9292.45	0.96	0.09	1.4						0				0			0	0
-34	151.25	20191227	3	2019-12-27 13:00:03	0.6	7657.78	0.79	0.07	1.4						0				0			0	0
-34	151.25	20191227	4	2019-12-27 14:00:03	0.45	7429.2	0.77	0.07	1.4						0				0			0	0
-34	151.25	20191227	5	2019-12-27 15:00:03	0.35	7219.07	0.74	0.07	1.4						0				0			0	0
-34	151.25	20191227	6	2019-12-27 16:00:03	0.3	7027.91	0.72	0.07	1.4						0				0			0	0
-34	151.25	20191227	7	2019-12-27 17:00:03	0.26	6742.14	0.69	0.06	1.4						0				0			0	0
-34	151.25	20191227	8	2019-12-27 18:00:03	0.22	6341.21	0.65	0.06	1.4						0.01				0			0.01	0.01292
-34	151.25	20191227	9	2019-12-27 19:00:03	0.2	5958.5	0.61	0.06	1.4						0.02				0			0.02	0.02584
-34	151.25	20191227	10	2019-12-27 20:00:03	0.2	5678.36	0.58	0.05	1.4						0.05				0			0.05	0.0646
-34	151.25	20191227	11	2019-12-27 21:00:03	0.2	5504.36	0.56	0.05	1.4						0.13				0			0.13	0.16796
-34	151.25	20191227	12	2019-12-27 22:00:03	0.22	5400.18	0.54	0.05	1.4						0.22				0			0.22	0.28424
-34	151.25	20191227	13	2019-12-27 23:00:03	0.25	5334.95	0.53	0.05	1.4						0.18				0			0.18	0.23256
-34	151.25	20191227	14	2019-12-28 00:00:03	0.3	5301.03	0.52	0.05	1.4						0.1				0			0.1	0.1292
-34	151.25	20191227	15	2019-12-28 01:00:03	0.34	5263.6	0.5	0.05	1.4						0.06				0			0.06	0.07752
-34	151.25	20191227	16	2019-12-28 02:00:03	0.38	5177.58	0.49	0.05	1.4						0.05				0			0.05	0.0646
-34	151.25	20191227	17	2019-12-28 03:00:03	0.42	5039.89	0.47	0.05	1.4						0.07				0			0.07	0.09044
-34	151.25	20191227	18	2019-12-28 04:00:03	0.47	4909.66	0.45	0.05	1.4						0.08				0			0.08	0.10336
-34	151.25	20191227	19	2019-12-28 05:00:03	0.52	4806.28	0.44	0.04	1.4						0.11				0			0.11	0.14212
-34	151.25	20191227	20	2019-12-28 06:00:03	0.45	4711.93	0.43	0.04	1.4						0.17				0			0.17	0.21964
-34	151.25	20191227	21	2019-12-28 07:00:03	0.34	4600.19	0.42	0.04	1.4						0.24				0			0.24	0.31008
-34	151.25	20191227	22	2019-12-28 08:00:03	0.3	4505.85	0.41	0.04	1.4						0.3				0			0.3	0.3876
-34	151.25	20191227	23	2019-12-28 09:00:03	0.28	4515.78	0.41	0.04	1.4						0.36				0			0.36	0.46512
-34	151.25	20191228	0	2019-12-28 10:00:03	0.75	7684.47	0.69	0.07	1.4						0.49				0			0.49	0.63308
-34	151.25	20191228	1	2019-12-28 11:00:03	0.6	7670.76	0.69	0.07	1.4						0.7				0			0.7	0.9044
-34	151.25	20191228	2	2019-12-28 12:00:03	0.48	7892.14	0.71	0.07	1.4						0.93				0			0.93	1.20156
-34	151.25	20191228	3	2019-12-28 13:00:03	1.58	10030.6	0.84	0.09	1.4						0.9				0			0.9	1.1628
-34	151.25	20191228	4	2019-12-28 14:00:03	1	9244.19	0.78	0.09	1.4						0.63				0			0.63	0.81396
-34	151.25	20191228	5	2019-12-28 15:00:03	0.74	9125.15	0.78	0.08	1.4						0.36				0			0.36	0.46512
-34	151.25	20191228	6	2019-12-28 16:00:03	0.67	10809.2	0.94	0.1	1.4						0.23				0			0.23	0.29716
-34	151.25	20191228	7	2019-12-28 17:00:03	0.74	15034.2	1.38	0.14	1.4						0.23				0			0.23	0.29716
-34	151.25	20191228	8	2019-12-28 18:00:03	0.81	20325	2.03	0.19	1.4						0.25				0			0.25	0.323
-34	151.25	20191228	9	2019-12-28 19:00:03	0.74	24229.4	2.68	0.23	1.41						0.26				0			0.26	0.33592
-34	151.25	20191228	10	2019-12-28 20:00:03	0.62	26293.9	3.27	0.26	1.42						0.28				0			0.28	0.36176
-34	151.25	20191228	11	2019-12-28 21:00:03	0.55	27240.6	3.89	0.27	1.43						0.27				0			0.27	0.34884
-34	151.25	20191228	12	2019-12-28 22:00:03	0.53	27576	4.36	0.28	1.44						0.21				0			0.21	0.27132
-34	151.25	20191228	13	2019-12-28 23:00:03	0.55	27598.3	4.63	0.28	1.45						0.18				0			0.18	0.23256
-34	151.25	20191228	14	2019-12-29 00:00:03	0.58	27723.8	4.6	0.29	1.45						0.32				0			0.32	0.41344
-34	151.25	20191228	15	2019-12-29 01:00:03	0.63	27857.4	4.15	0.28	1.44						0.47				0			0.47	0.60724
-34	151.25	20191228	16	2019-12-29 02:00:03	0.77	27679.1	3.6	0.27	1.43						0.58				0			0.58	0.74936
-34	151.25	20191228	17	2019-12-29 03:00:03	1.1	27143.1	3.25	0.26	1.42						0.77				0			0.77	0.99484
-34	151.25	20191228	18	2019-12-29 04:00:03	1.64	26263.8	2.96	0.25	1.41						1.05				0			1.05	1.3566
-34	151.25	20191228	19	2019-12-29 05:00:03	2.26	25198.5	2.69	0.24	1.41						1.35				0			1.35	1.7442
-34	151.25	20191228	20	2019-12-29 06:00:03	2.72	24043.3	2.47	0.23	1.41						1.63				0			1.63	2.10596
-34	151.25	20191228	21	2019-12-29 07:00:03	3	22895	2.29	0.21	1.41						2.01				0			2.01	2.59692
-34	151.25	20191228	22	2019-12-29 08:00:03	3.37	21866.1	2.15	0.2	1.41						2.43				0			2.43	3.13956
-34	151.25	20191228	23	2019-12-29 09:00:03	3.73	21098.1	2.07	0.2	1.41						2.62				0			2.62	3.38504
-34	151.25	20191229	0	2019-12-29 10:00:03	1.56	29971	2.94	0.28	1.4						2.74				0			2.74	3.54008
-34	151.25	20191229	1	2019-12-29 11:00:03	1.09	28467	2.94	0.27	1.41						2.8				0			2.8	3.6176
-34	151.25	20191229	2	2019-12-29 12:00:03	0.89	27445.2	3.22	0.27	1.42						2.8				0			2.8	3.6176
-34	151.25	20191229	3	2019-12-29 13:00:03	27.88	33712.5	3.63	0.32	1.41						2.49				0			2.49	3.21708
-34	151.25	20191229	4	2019-12-29 14:00:03	19.67	31849.7	3.23	0.3	1.41						1.4				0			1.4	1.8088
-34	151.25	20191229	5	2019-12-29 15:00:03	12.68	31983.4	3.24	0.3	1.41						0.73				0			0.73	0.94316
-34	151.25	20191229	6	2019-12-29 16:00:03	2.55	27573	3.31	0.27	1.42						0.56				0			0.56	0.72352
-34	151.25	20191229	7	2019-12-29 17:00:03	1.32	28884.8	4.1	0.29	1.43						0.46				0			0.46	0.59432
-34	151.25	20191229	8	2019-12-29 18:00:03	0.86	28803.3	4.36	0.29	1.43						0.36				0			0.36	0.46512
-34	151.25	20191229	9	2019-12-29 19:00:03	0.72	27863.9	3.89	0.28	1.43						0.27				0			0.27	0.34884
-34	151.25	20191229	10	2019-12-29 20:00:03	0.66	26589	3.36	0.26	1.42						0.2				0			0.2	0.2584
-34	151.25	20191229	11	2019-12-29 21:00:03	0.63	25321.9	3.09	0.25	1.42						0.12				0			0.12	0.15504
-34	151.25	20191229	12	2019-12-29 22:00:03	0.58	24241.6	2.85	0.23	1.41						0.08				0			0.08	0.10336
-34	151.25	20191229	13	2019-12-29 23:00:03	0.55	23303	2.58	0.22	1.41						0.05				0			0.05	0.0646
-34	151.25	20191229	14	2019-12-30 00:00:03	0.55	22476.3	2.38	0.21	1.41						0.08				0			0.08	0.10336
-34	151.25	20191229	15	2019-12-30 01:00:03	0.56	21887.2	2.23	0.2	1.4						0.24				0			0.24	0.31008
-34	151.25	20191229	16	2019-12-30 02:00:03	0.59	21456	2.13	0.2	1.4						0.49				0			0.49	0.63308
-34	151.25	20191229	17	2019-12-30 03:00:03	0.65	21009.6	2.04	0.2	1.4						0.74				0			0.74	0.95608
-34	151.25	20191229	18	2019-12-30 04:00:03	0.76	20525.6	1.97	0.19	1.4						0.96				0			0.96	1.24032
-34	151.25	20191229	19	2019-12-30 05:00:03	0.98	20020.5	1.91	0.19	1.4						1.11				0			1.11	1.43412
-34	151.25	20191229	20	2019-12-30 06:00:03	1.14	19505.9	1.85	0.18	1.4						1.21				0			1.21	1.56332
-34	151.25	20191229	21	2019-12-30 07:00:03	1.17	18940.7	1.78	0.18	1.4						1.28				0			1.28	1.65376
-34	151.25	20191229	22	2019-12-30 08:00:03	1.32	18275.3	1.71	0.17	1.4						1.31				0			1.31	1.69252
-34	151.25	20191229	23	2019-12-30 09:00:03	1.54	17492.7	1.64	0.16	1.4						1.32				0			1.32	1.70544
-34	151.25	20191230	0	2019-12-30 10:00:03	1.74	19391.6	1.78	0.18	1.4						1.42				0			1.42	1.83464
-34	151.25	20191230	1	2019-12-30 11:00:03	1.92	18937.5	1.74	0.18	1.4						1.67				0			1.67	2.15764
-34	151.25	20191230	2	2019-12-30 12:00:03	2.16	18782	1.73	0.18	1.4						1.91				0			1.91	2.46772
-34	151.25	20191230	3	2019-12-30 13:00:03	2.4	19839.9	1.88	0.19	1.4						1.6				0			1.6	2.0672
-34	151.25	20191230	4	2019-12-30 14:00:03	2.64	19622.9	1.9	0.18	1.41						0.87				0			0.87	1.12404
-34	151.25	20191230	5	2019-12-30 15:00:03	2.8	20203.9	1.97	0.19	1.41						0.57				0			0.57	0.73644
-34	151.25	20191230	6	2019-12-30 16:00:03	2.51	21508.3	2.08	0.2	1.41						0.46				0			0.46	0.59432
-34	151.25	20191230	7	2019-12-30 17:00:03	1.79	23550.5	2.25	0.22	1.41						0.32				0			0.32	0.41344
-34	151.25	20191230	8	2019-12-30 18:00:03	1.09	25829.8	2.45	0.24	1.41						0.17				0			0.17	0.21964
-34	151.25	20191230	9	2019-12-30 19:00:03	0.69	28674.7	2.69	0.27	1.4						0.13				0			0.13	0.16796
-34	151.25	20191230	10	2019-12-30 20:00:03	0.5	31893.1	2.97	0.3	1.4						0.1				0			0.1	0.1292
-34	151.25	20191230	11	2019-12-30 21:00:03	0.41	33621.2	3.13	0.31	1.4						0.16				0			0.16	0.20672
-34	151.25	20191230	12	2019-12-30 22:00:03	0.41	33114.3	3.09	0.31	1.4						0.45				0			0.45	0.5814
-34	151.25	20191230	13	2019-12-30 23:00:03	0.56	31221.8	2.92	0.29	1.4						0.96				0			0.96	1.24032
-34	151.25	20191230	14	2019-12-31 00:00:03	1.02	28457.8	2.69	0.26	1.4						1.42				0			1.42	1.83464
-34	151.25	20191230	15	2019-12-31 01:00:03	2.04	24784.8	2.37	0.23	1.4						2.11				0			2.11	2.72612
-34	151.25	20191230	16	2019-12-31 02:00:03	3.36	20835.3	2.02	0.19	1.4						2.43				0			2.43	3.13956
-34	151.25	20191230	17	2019-12-31 03:00:03	4.34	17653	1.73	0.16	1.4						2.02				0			2.02	2.60984
-34	151.25	20191230	18	2019-12-31 04:00:03	5.01	15596.4	1.52	0.15	1.4						1.11				0			1.11	1.43412
-34	151.25	20191230	19	2019-12-31 05:00:03	5.44	14229.1	1.37	0.13	1.4						0.46				0			0.46	0.59432
-34	151.25	20191230	20	2019-12-31 06:00:03	5.68	12888.4	1.23	0.12	1.4						0.27				0			0.27	0.34884
-34	151.25	20191230	21	2019-12-31 07:00:03	5.83	11680.7	1.1	0.11	1.4						0.16				0			0.16	0.20672
-34	151.25	20191230	22	2019-12-31 08:00:03	5.51	11151.3	1.05	0.1	1.4						0.08				0			0.08	0.10336
-34	151.25	20191230	23	2019-12-31 09:00:03	4.04	11341.5	1.05	0.11	1.4						0.06				0			0.06	0.07752
-34	151.25	20191231	0	2019-12-31 10:00:03	1.66	9419.81	0.87	0.09	1.4						0.09				0			0.09	0.11628
-34	151.25	20191231	1	2019-12-31 11:00:03	1.69	11044.6	0.99	0.1	1.4						0.14				0			0.14	0.18088
-34	151.25	20191231	2	2019-12-31 12:00:03	2.35	13108.5	1.13	0.12	1.4						0.25				0			0.25	0.323
-34	151.25	20191231	3	2019-12-31 13:00:03	2.49	13078.9	1.12	0.12	1.4						0.38				0			0.38	0.49096
-34	151.25	20191231	4	2019-12-31 14:00:03	2.79	14763.2	1.29	0.14	1.4						0.61				0			0.61	0.78812
-34	151.25	20191231	5	2019-12-31 15:00:03	2.98	18601.1	1.69	0.17	1.4						0.64				0			0.64	0.82688
-34	151.25	20191231	6	2019-12-31 16:00:03	1.4	10771.4	1.25	0.1	1.42						0.61				0			0.61	0.78812
-34	151.25	20191231	7	2019-12-31 17:00:03	1.24	11196.7	1.63	0.11	1.43						0.49				0			0.49	0.63308
-34	151.25	20191231	8	2019-12-31 18:00:03	1.04	10813.2	1.57	0.11	1.44						0.73				0			0.73	0.94316
-34	151.25	20191231	9	2019-12-31 19:00:03	0.89	9494.62	1.28	0.09	1.43						1.16				0			1.16	1.49872
-34	151.25	20191231	10	2019-12-31 20:00:03	0.72	8256.98	1.07	0.08	1.42						0.92				0			0.92	1.18864
-34	151.25	20191231	11	2019-12-31 21:00:03	0.47	7248.87	0.97	0.07	1.42						0.37				0			0.37	0.47804
-34	151.25	20191231	12	2019-12-31 22:00:03	0.32	6171.78	0.83	0.06	1.41						0.17				0			0.17	0.21964
-34	151.25	20191231	13	2019-12-31 23:00:03	0.27	5143.12	0.67	0.05	1.41						0.15				0			0.15	0.1938
-34	151.25	20191231	14	2020-01-01 00:00:03	0.33	4434.95	0.61	0.04	1.42						0.21				0			0.21	0.27132
-34	151.25	20191231	15	2020-01-01 01:00:03	0.43	4084.63	0.63	0.04	1.43						0.32				0			0.32	0.41344
-34	151.25	20191231	16	2020-01-01 02:00:03	0.54	3939.86	0.63	0.04	1.43						0.49				0			0.49	0.63308
-34	151.25	20191231	17	2020-01-01 03:00:03	0.64	3805.24	0.6	0.04	1.43						0.66				0			0.66	0.85272
-34	151.25	20191231	18	2020-01-01 04:00:03	0.7	3717.88	0.59	0.04	1.43						0.68				0			0.68	0.87856
-34	151.25	20191231	19	2020-01-01 05:00:03	0.74	3788.77	0.6	0.04	1.43						0.82				0			0.82	1.05944
-34	151.25	20191231	20	2020-01-01 06:00:03	0.74	3940.68	0.61	0.04	1.43						0.92				0			0.92	1.18864
-34	151.25	20191231	21	2020-01-01 07:00:03	0.74	3851.3	0.62	0.04	1.44						0.96				0			0.96	1.24032
-34	151.25	20191231	22	2020-01-01 08:00:03	0.74	3497.01	0.59	0.04	1.45						0.95				0			0.95	1.2274
-34	151.25	20191231	23	2020-01-01 09:00:03	0.74	3158.01	0.53	0.03	1.45						0.83				0			0.83	1.07236
															0.67				0			0.67	0.86564
																			0				0
																							0
																							0
