# Supplementary material for: Black Carbon Emission, Transport and Effect on Radiation Forcing Modelling During the Summer 2019–2020 Wildfires in Southeast Australia
Source: Preprints.org preprint supplement (doi:10.20944/preprints202302.0293.v1), 2023-02-17
Supplement: Supplementary file 13 [file merra_bc_201912_300.xlsx]

## Sheet: merra_bc_201912_300
lat	lon	date	time	date_time	bc	bccmass	totexttau	bcexttau	bcangstr			Date	MERRA-2 Predicted BC						Observed BC	Observed BC daily	WRF-Chem daily	WRF-Chem BC (micrograms/kg)	WRF-Chem BC(micrograms/m3)
-33	151.875	20191201	0	2019-12-01 10:00:00	0.67	1527.88	0.55	0.02	1.48			2019-12-01	1.94143						0.186	0.540786	0.424514	0	0
-33	151.875	20191201	1	2019-12-01 11:00:00	0.7	2154.69	0.56	0.02	1.45			2019-12-02	2.11917					NEWCASTLE BC6 1h average [ng/m³]	0.153	2.16971	2.25938	0	0
-33	151.875	20191201	2	2019-12-01 12:00:00	0.84	3650.59	0.55	0.04	1.42			2019-12-03	3.86792					186	0.198	2.12117	6.2915	0	0
-33	151.875	20191201	3	2019-12-01 13:00:00	1.15	5353.67	0.6	0.05	1.41			2019-12-04	3.19917					153	0.177	3.18379	0.775738	0	0
-33	151.875	20191201	4	2019-12-01 14:00:00	1.47	7426.89	0.73	0.07	1.41			2019-12-05	15.5613					198	0.209	5.68142	2.93445	0	0
-33	151.875	20191201	5	2019-12-01 15:00:00	1.85	10586.3	0.96	0.1	1.4			2019-12-06	6.425					177	0.316	2.09792	2.88331	0	0
-33	151.875	20191201	6	2019-12-01 16:00:00	2.2	13911.6	1.22	0.13	1.4			2019-12-07	0.6925					209	0.395	0.73675	0.967385	0.02	0.02584
-33	151.875	20191201	7	2019-12-01 17:00:00	2.39	15148.1	1.31	0.14	1.4			2019-12-08	0.284583					316	0.382	0.343417	1.70113	0.06	0.07752
-33	151.875	20191201	8	2019-12-01 18:00:00	2.39	12489.6	1.08	0.12	1.4			2019-12-09	0.493333					395	0.734	0.475125	2.2863	0.08	0.10336
-33	151.875	20191201	9	2019-12-01 19:00:00	2.32	7637.54	0.66	0.07	1.4			2019-12-10	1.42042					382	1.015	2.79221	0.748822	0.09	0.11628
-33	151.875	20191201	10	2019-12-01 20:00:00	2.32	4671.99	0.41	0.04	1.4			2019-12-11	0.29					734	0.852	0.335875	0.00861333	0.04	0.05168
-33	151.875	20191201	11	2019-12-01 21:00:00	2.56	3824.58	0.34	0.04	1.4			2019-12-12	0.334167					1015	0.843	0.431708	0.03553	0.15	0.1938
-33	151.875	20191201	12	2019-12-01 22:00:00	3.02	3914.09	0.36	0.04	1.4			2019-12-13	0.142917					852	1.051	0.264167	0.033915	2.55	3.2946
-33	151.875	20191201	13	2019-12-01 23:00:00	3.3	3718.23	0.36	0.03	1.41			2019-12-14	0.324583					843	1.06	0.4195	0.079135	1.61	2.08012
-33	151.875	20191201	14	2019-12-02 00:00:00	2.83	2793.29	0.28	0.03	1.41			2019-12-15	1.1375					1051	0.364	0.471875	0.101745	1.94	2.50648
-33	151.875	20191201	15	2019-12-02 01:00:00	1.79	1820.37	0.19	0.02	1.41			2019-12-16	1.31167					1060	1.425	0.805542	0.300928	0.74	0.95608
-33	151.875	20191201	16	2019-12-02 02:00:00	1.09	1295.42	0.14	0.01	1.41			2019-12-17	0.392917					364	2.51	0.109875	0	0.22	0.28424
-33	151.875	20191201	17	2019-12-02 03:00:00	0.69	1038.9	0.12	0.01	1.41			2019-12-18	0.805					1425	1.739	0.424875	0.0199183	0.13	0.16796
-33	151.875	20191201	18	2019-12-02 04:00:00	0.64	919.7	0.11	0.01	1.42			2019-12-19	2.64125					2510	0.356	1.93125	1.85886	0.02	0.02584
-33	151.875	20191201	19	2019-12-02 05:00:00	0.61	846.27	0.1	0.01	1.42			2019-12-20	0.435					1739	0.23	0.26125	0.715983	0.02	0.02584
-33	151.875	20191201	20	2019-12-02 06:00:00	0.53	808.2	0.1	0.01	1.42			2019-12-21	2.14333					356	0.592	0.9205	1.24516	0.02	0.02584
-33	151.875	20191201	21	2019-12-02 07:00:00	0.42	805.58	0.11	0.01	1.41			2019-12-22	0.372083					230	0.485	0.124542	0.456507	0.02	0.02584
-33	151.875	20191201	22	2019-12-02 08:00:00	0.34	810.25	0.11	0.01	1.41			2019-12-23	0.50125					592	0.367	0.2185	0.0527567	0.01	0.01292
-33	151.875	20191201	23	2019-12-02 09:00:00	0.36	961.41	0.13	0.01	1.41			2019-12-24	0.399583					485	0.406	0.272292	0.0253017	0.01	0.01292
-33	151.875	20191202	0	2019-12-02 10:00:00	0.94	2355.62	0.32	0.02	1.42			2019-12-25	0.290417					367	1.514	0.357542	0	0	0
-33	151.875	20191202	1	2019-12-02 11:00:00	2.37	5832.06	0.76	0.06	1.42			2019-12-26	0.23					406	1.206	0.323208	0	0	0
-33	151.875	20191202	2	2019-12-02 12:00:00	4.57	11106.6	1.36	0.11	1.42			2019-12-27	0.0995833					1514	0.888	0.203667	0.13243	0.02	0.02584
-33	151.875	20191202	3	2019-12-02 13:00:00	5.15	11960.5	1.43	0.11	1.41			2019-12-28	0.185					1206	0	0.24825	0.295545	0.03	0.03876
-33	151.875	20191202	4	2019-12-02 14:00:00	6.58	15630.7	1.75	0.15	1.41			2019-12-29	0.643333					888	1.255	0.539958	0.543717	0.57	0.73644
-33	151.875	20191202	5	2019-12-02 15:00:00	6.82	16228	1.75	0.15	1.41			2019-12-30	0.741667						0.736	0.562958	0.508187	2.64	3.41088
-33	151.875	20191202	6	2019-12-02 16:00:00	5.48	12965.5	1.3	0.12	1.41			2019-12-31	1.3925					1255	3.99	1.29225	0.535103	3.73	4.81916
-33	151.875	20191202	7	2019-12-02 17:00:00	3.47	8071.48	0.77	0.08	1.4			2020-01-01	0.292					736	8.196	1.1629	0.69122	3.98	5.14216
-33	151.875	20191202	8	2019-12-02 18:00:00	2.02	4650.1	0.43	0.04	1.4									3990	3.116			4.14	5.34888
-33	151.875	20191202	9	2019-12-02 19:00:00	1.23	2845.16	0.26	0.03	1.4									8196	2.149			6.41	8.28172
-33	151.875	20191202	10	2019-12-02 20:00:00	0.89	2051.2	0.2	0.02	1.4									3116	5.201			6.96	8.99232
-33	151.875	20191202	11	2019-12-02 21:00:00	0.76	1676.07	0.16	0.02	1.4									2149	4.121			6.73	8.69516
-33	151.875	20191202	12	2019-12-02 22:00:00	0.67	1380.77	0.13	0.01	1.4									5201	4.811			3.1	4.0052
-33	151.875	20191202	13	2019-12-02 23:00:00	0.61	1151.77	0.11	0.01	1.4									4121	6.416			0.53	0.68476
-33	151.875	20191202	14	2019-12-03 00:00:00	0.59	1009.5	0.1	0.01	1.4									4811	5.055			0.38	0.49096
-33	151.875	20191202	15	2019-12-03 01:00:00	0.58	928.14	0.09	0.01	1.4									6416	2.406			0.39	0.50388
-33	151.875	20191202	16	2019-12-03 02:00:00	0.55	851.59	0.09	0.01	1.4									5055	0.722			0.2	0.2584
-33	151.875	20191202	17	2019-12-03 03:00:00	0.5	774.22	0.08	0.01	1.4									2406	0.463			0.03	0.03876
-33	151.875	20191202	18	2019-12-03 04:00:00	0.45	720.6	0.07	0.01	1.4									722	0.491			0.03	0.03876
-33	151.875	20191202	19	2019-12-03 05:00:00	0.44	689.65	0.07	0.01	1.4									463	0.536			0.02	0.02584
-33	151.875	20191202	20	2019-12-03 06:00:00	0.41	677.26	0.07	0.01	1.4									491	0.582			0.02	0.02584
-33	151.875	20191202	21	2019-12-03 07:00:00	0.36	698.98	0.07	0.01	1.4									536	0.572			0.03	0.03876
-33	151.875	20191202	22	2019-12-03 08:00:00	0.36	767.94	0.07	0.01	1.4									582	0.897			0.08	0.10336
-33	151.875	20191202	23	2019-12-03 09:00:00	0.44	967.9	0.08	0.01	1.4									572	1.552			0.03	0.03876
-33	151.875	20191203	0	2019-12-03 10:00:00	0.78	1696.49	0.15	0.02	1.4									897	1.081			0.02	0.02584
-33	151.875	20191203	1	2019-12-03 11:00:00	1.39	3596.45	0.31	0.03	1.4									1552	1.456			0.01	0.01292
-33	151.875	20191203	2	2019-12-03 12:00:00	2.85	8867.04	0.74	0.08	1.4									1081	0.514			0.02	0.02584
-33	151.875	20191203	3	2019-12-03 13:00:00	3.68	10965	0.92	0.1	1.4									1456	0.875			0.05	0.0646
-33	151.875	20191203	4	2019-12-03 14:00:00	4.57	14031.6	1.18	0.13	1.4									514	0.714			0.22	0.28424
-33	151.875	20191203	5	2019-12-03 15:00:00	6.21	21802	1.83	0.2	1.4									875	0.802			0.58	0.74936
-33	151.875	20191203	6	2019-12-03 16:00:00	8.05	32171.9	2.68	0.3	1.4									714	1.138			3.6	4.6512
-33	151.875	20191203	7	2019-12-03 17:00:00	9.19	38832.2	3.21	0.36	1.4									802	1.392			7.71	9.96132
-33	151.875	20191203	8	2019-12-03 18:00:00	10.03	37235.9	3.06	0.35	1.4									1138	1.164			15.71	20.2973
-33	151.875	20191203	9	2019-12-03 19:00:00	10.56	27203.4	2.23	0.25	1.4									1392	1.099			34.19	44.1735
-33	151.875	20191203	10	2019-12-03 20:00:00	10.2	15745.2	1.29	0.15	1.4									1164	1.018			20.43	26.3956
-33	151.875	20191203	11	2019-12-03 21:00:00	8.64	8406.28	0.7	0.08	1.4									1099	1.654			15.96	20.6203
-33	151.875	20191203	12	2019-12-03 22:00:00	6.78	4925.42	0.43	0.05	1.4									1018	10.957			14.03	18.1268
-33	151.875	20191203	13	2019-12-03 23:00:00	5.22	3627.55	0.33	0.03	1.4									1654	13.768			3.13	4.04396
-33	151.875	20191203	14	2019-12-04 00:00:00	4.1	3061.83	0.28	0.03	1.4									10957	4.523			0.98	1.26616
-33	151.875	20191203	15	2019-12-04 01:00:00	3.4	2646.37	0.24	0.02	1.4									13768	0.48			0.17	0.21964
-33	151.875	20191203	16	2019-12-04 02:00:00	2.87	2264.58	0.2	0.02	1.4									4523	0.522			0.06	0.07752
-33	151.875	20191203	17	2019-12-04 03:00:00	2.52	1951.83	0.17	0.02	1.4									480	1.308			0.05	0.0646
-33	151.875	20191203	18	2019-12-04 04:00:00	2.39	1724.07	0.15	0.02	1.4									522	2.785			0.07	0.09044
-33	151.875	20191203	19	2019-12-04 05:00:00	2.41	1566.76	0.14	0.01	1.4									1308	4.296			0.27	0.34884
-33	151.875	20191203	20	2019-12-04 06:00:00	2.24	1432.94	0.13	0.01	1.4									2785	4.547			0.71	0.91732
-33	151.875	20191203	21	2019-12-04 07:00:00	1.53	1314.37	0.12	0.01	1.4									4296	2.223			1.18	1.52456
-33	151.875	20191203	22	2019-12-04 08:00:00	0.99	1294.64	0.11	0.01	1.4									4547	1.401			0.71	0.91732
-33	151.875	20191203	23	2019-12-04 09:00:00	0.85	1505.82	0.13	0.01	1.4									2223	2.44			0.7	0.9044
-33	151.875	20191204	0	2019-12-04 10:00:00	1.12	2635.69	0.22	0.02	1.4									1401	1.97			0.7	0.9044
-33	151.875	20191204	1	2019-12-04 11:00:00	2.11	6459.6	0.54	0.06	1.4									2440	1.923			0.69	0.89148
-33	151.875	20191204	2	2019-12-04 12:00:00	4.45	16805.8	1.39	0.16	1.4									1970	2.811			0.54	0.69768
-33	151.875	20191204	3	2019-12-04 13:00:00	1.49	6110.35	0.53	0.06	1.4									1923	2.45			0.48	0.62016
-33	151.875	20191204	4	2019-12-04 14:00:00	2.66	12107.6	1.03	0.11	1.4									2811	1.964			0.46	0.59432
-33	151.875	20191204	5	2019-12-04 15:00:00	4.57	24763	2.08	0.23	1.4									2450	7.284			0.26	0.33592
-33	151.875	20191204	6	2019-12-04 16:00:00	4.45	40324.8	3.42	0.37	1.4									1964	17.329			0.26	0.33592
-33	151.875	20191204	7	2019-12-04 17:00:00	4.8	50723	4.28	0.47	1.4									7284	9.829			0.21	0.27132
-33	151.875	20191204	8	2019-12-04 18:00:00	4.48	54999.4	4.67	0.51	1.4									17329	1.307			0.2	0.2584
-33	151.875	20191204	9	2019-12-04 19:00:00	4.29	52482.3	4.49	0.49	1.4									9829	0.897			0.2	0.2584
-33	151.875	20191204	10	2019-12-04 20:00:00	4.28	45554.9	3.91	0.42	1.4									1307	0.76			0.19	0.24548
-33	151.875	20191204	11	2019-12-04 21:00:00	4.34	37016.8	3.19	0.34	1.4									897	0.942			0.21	0.27132
-33	151.875	20191204	12	2019-12-04 22:00:00	4.73	28619.5	2.48	0.27	1.4									760	1.001			1.1	1.4212
-33	151.875	20191204	13	2019-12-04 23:00:00	5.71	21526.7	1.89	0.2	1.4									942	1.419			4.01	5.18092
-33	151.875	20191204	14	2019-12-05 00:00:00	7.27	15798.2	1.42	0.15	1.4									1001	1.683			5.88	7.59696
-33	151.875	20191204	15	2019-12-05 01:00:00	9.42	11161.5	1.02	0.1	1.4									1419	2.604			3.15	4.0698
-33	151.875	20191204	16	2019-12-05 02:00:00	12.21	7616.7	0.71	0.07	1.4									1683	6.386			1.48	1.91216
-33	151.875	20191204	17	2019-12-05 03:00:00	15.18	5597.69	0.53	0.05	1.4									2604	8.166			1.77	2.28684
-33	151.875	20191204	18	2019-12-05 04:00:00	17.62	4681.69	0.44	0.04	1.4									6386	9.334			1.31	1.69252
-33	151.875	20191204	19	2019-12-05 05:00:00	18.42	4134.49	0.38	0.04	1.4									8166	8.755			0.93	1.20156
-33	151.875	20191204	20	2019-12-05 06:00:00	16.88	3620.34	0.33	0.03	1.4									9334	10.718			0.56	0.72352
-33	151.875	20191204	21	2019-12-05 07:00:00	12.1	3124	0.28	0.03	1.4									8755	13.354			0.34	0.43928
-33	151.875	20191204	22	2019-12-05 08:00:00	6.58	2825.91	0.25	0.03	1.41									10718	7.853			0.28	0.36176
-33	151.875	20191204	23	2019-12-05 09:00:00	3.89	2878.03	0.25	0.03	1.4									13354	4.584			0.2	0.2584
-33	151.875	20191205	0	2019-12-05 10:00:00	3.28	8857.6	0.73	0.08	1.4									7853	4.96			0.15	0.1938
-33	151.875	20191205	1	2019-12-05 11:00:00	5.09	13823	1.14	0.13	1.4									4584	5.258			0.14	0.18088
-33	151.875	20191205	2	2019-12-05 12:00:00	9.86	32147.9	2.65	0.3	1.4									4960	6.171			0.17	0.21964
-33	151.875	20191205	3	2019-12-05 13:00:00	9.15	31207	2.54	0.29	1.4									5258	5.393			0.23	0.29716
-33	151.875	20191205	4	2019-12-05 14:00:00	11.16	43366.6	3.6	0.4	1.4									6171	4.367			0.28	0.36176
-33	151.875	20191205	5	2019-12-05 15:00:00	14.84	65567.5	5.43	0.61	1.4									5393	1.837			0.72	0.93024
-33	151.875	20191205	6	2019-12-05 16:00:00	19.89	84399.1	6.85	0.78	1.4									4367	4.408			0.87	1.12404
-33	151.875	20191205	7	2019-12-05 17:00:00	25.52	82434.2	6.56	0.77	1.4									1837	4.287			0.38	0.49096
-33	151.875	20191205	8	2019-12-05 18:00:00	30.17	57430.3	4.49	0.53	1.4									4408	3.392			0.5	0.646
-33	151.875	20191205	9	2019-12-05 19:00:00	32.38	32104.5	2.49	0.3	1.4									4287	2.759			0.61	0.78812
-33	151.875	20191205	10	2019-12-05 20:00:00	31.99	19135.8	1.48	0.18	1.4									3392	3.135			3.19	4.12148
-33	151.875	20191205	11	2019-12-05 21:00:00	27.47	12621.6	0.99	0.12	1.4									2759	3.968			7.82	10.1034
-33	151.875	20191205	12	2019-12-05 22:00:00	19.81	8194.99	0.65	0.08	1.4									3135	5.293			9.3	12.0156
-33	151.875	20191205	13	2019-12-05 23:00:00	13.29	5531.96	0.44	0.05	1.4									3968	7.689			14.25	18.411
-33	151.875	20191205	14	2019-12-06 00:00:00	9.46	4109.44	0.33	0.04	1.4									5293	8.438			17.7	22.8684
-33	151.875	20191205	15	2019-12-06 01:00:00	8.04	3372.97	0.28	0.03	1.41									7689	5.066			12.81	16.5505
-33	151.875	20191205	16	2019-12-06 02:00:00	8.32	3180.61	0.27	0.03	1.41									8438	0.937			6.39	8.25588
-33	151.875	20191205	17	2019-12-06 03:00:00	9.35	3320.14	0.3	0.03	1.42									5066	0.955			3.25	4.199
-33	151.875	20191205	18	2019-12-06 04:00:00	10.18	3522.24	0.33	0.03	1.42									937	1.001			2.62	3.38504
-33	151.875	20191205	19	2019-12-06 05:00:00	10.65	3717.05	0.35	0.04	1.42									955	1.007			1.91	2.46772
-33	151.875	20191205	20	2019-12-06 06:00:00	10.44	3802.99	0.35	0.04	1.41									1001	1.042			1.85	2.3902
-33	151.875	20191205	21	2019-12-06 07:00:00	8.37	3752.36	0.33	0.04	1.41									1007	1.134			1.45	1.8734
-33	151.875	20191205	22	2019-12-06 08:00:00	6.51	3765.62	0.33	0.04	1.4									1042	1.577			1.69	2.18348
-33	151.875	20191205	23	2019-12-06 09:00:00	5.23	4465.82	0.38	0.04	1.4									1134	2.837			1.49	1.92508
-33	151.875	20191206	0	2019-12-06 10:00:00	5.45	8323.76	0.71	0.08	1.41									1577	2.681			1.01	1.30492
-33	151.875	20191206	1	2019-12-06 11:00:00	6.45	15668.5	1.34	0.15	1.41									2837	2.209			0	0
-33	151.875	20191206	2	2019-12-06 12:00:00	10.11	32625.6	2.8	0.3	1.41									2681	2.159			0.02	0.02584
-33	151.875	20191206	3	2019-12-06 13:00:00	10.76	41657	3.51	0.39	1.41									2209	1.959			0.05	0.0646
-33	151.875	20191206	4	2019-12-06 14:00:00	12.83	57604.7	4.92	0.54	1.4									2159	1.765			0.03	0.03876
-33	151.875	20191206	5	2019-12-06 15:00:00	11.99	66041.8	5.67	0.62	1.4									1959	1.972			0	0
-33	151.875	20191206	6	2019-12-06 16:00:00	1.51	9511.57	0.88	0.09	1.41									1765	1.668			0.02	0.02584
-33	151.875	20191206	7	2019-12-06 17:00:00	1.35	7372.97	0.66	0.07	1.41									1972	2.084			0.09	0.11628
-33	151.875	20191206	8	2019-12-06 18:00:00	1.32	7566.01	0.65	0.07	1.4									1668	1.992			0.21	0.27132
-33	151.875	20191206	9	2019-12-06 19:00:00	1.29	8457.22	0.72	0.08	1.4									2084	2.092			0.29	0.37468
-33	151.875	20191206	10	2019-12-06 20:00:00	1.29	9072.27	0.78	0.08	1.4									1992	1.593			0.34	0.43928
-33	151.875	20191206	11	2019-12-06 21:00:00	1.29	9120.39	0.81	0.09	1.41									2092	1.581			0.18	0.23256
-33	151.875	20191206	12	2019-12-06 22:00:00	1.13	8536.79	0.78	0.08	1.41									1593	1.587			0.07	0.09044
-33	151.875	20191206	13	2019-12-06 23:00:00	0.88	7467.88	0.7	0.07	1.41									1581	1.014			0.09	0.11628
-33	151.875	20191206	14	2019-12-07 00:00:00	0.73	6037.91	0.58	0.06	1.41									1587	0.595			0.11	0.14212
-33	151.875	20191206	15	2019-12-07 01:00:00	0.66	4589.83	0.46	0.04	1.41									1014	0.369			0.14	0.18088
-33	151.875	20191206	16	2019-12-07 02:00:00	0.6	3356.11	0.36	0.03	1.41									595	0.264			0.17	0.21964
-33	151.875	20191206	17	2019-12-07 03:00:00	0.58	2456.31	0.31	0.02	1.42									369	0.285			0.19	0.24548
-33	151.875	20191206	18	2019-12-07 04:00:00	0.58	1902.55	0.27	0.02	1.43									264	0.288			0.23	0.29716
-33	151.875	20191206	19	2019-12-07 05:00:00	0.56	1579.39	0.24	0.02	1.44									285	0.302			0.28	0.36176
-33	151.875	20191206	20	2019-12-07 06:00:00	0.54	1388.78	0.22	0.01	1.44									288	0.372			0.4	0.5168
-33	151.875	20191206	21	2019-12-07 07:00:00	0.53	1265.58	0.2	0.01	1.43									302	0.69			0.72	0.93024
-33	151.875	20191206	22	2019-12-07 08:00:00	0.53	1214.93	0.19	0.01	1.43									372	0.883			1.15	1.4858
-33	151.875	20191206	23	2019-12-07 09:00:00	0.52	1254.93	0.18	0.01	1.42									690	0.892			1.66	2.14472
-33	151.875	20191207	0	2019-12-07 10:00:00	0.92	7982.82	0.65	0.07	1.41									883	1.03			2.07	2.67444
-33	151.875	20191207	1	2019-12-07 11:00:00	1.04	8644.72	0.71	0.08	1.41									892	1.044			2.09	2.70028
-33	151.875	20191207	2	2019-12-07 12:00:00	1.19	7941	0.72	0.07	1.41									1030	1.029			1.85	2.3902
-33	151.875	20191207	3	2019-12-07 13:00:00	1.68	13561.6	1.22	0.13	1.4									1044	1.008			1.39	1.79588
-33	151.875	20191207	4	2019-12-07 14:00:00	1.87	20417.5	1.81	0.19	1.4									1029	0.977			0.73	0.94316
-33	151.875	20191207	5	2019-12-07 15:00:00	1.32	28597.6	2.47	0.27	1.4									1008	0.972			0.54	0.69768
-33	151.875	20191207	6	2019-12-07 16:00:00	0.69	37428.3	3.17	0.35	1.4									977	0.943			0.61	0.78812
-33	151.875	20191207	7	2019-12-07 17:00:00	0.4	43418	3.65	0.4	1.4									972	1.01			0.67	0.86564
-33	151.875	20191207	8	2019-12-07 18:00:00	0.32	44356.3	3.74	0.41	1.4									943	0.871			0.72	0.93024
-33	151.875	20191207	9	2019-12-07 19:00:00	0.29	40007	3.41	0.37	1.4									1010	0.79			0.75	0.969
-33	151.875	20191207	10	2019-12-07 20:00:00	0.27	31334.3	2.74	0.29	1.4									871	0.822			0.59	0.76228
-33	151.875	20191207	11	2019-12-07 21:00:00	0.27	22491.1	2.04	0.21	1.4									790	0.737			0.27	0.34884
-33	151.875	20191207	12	2019-12-07 22:00:00	0.27	15906.5	1.53	0.15	1.4									822	0.8			0.23	0.29716
-33	151.875	20191207	13	2019-12-07 23:00:00	0.26	11273.7	1.16	0.11	1.4									737	0.709			0.41	0.52972
-33	151.875	20191207	14	2019-12-08 00:00:00	0.26	8170.7	0.89	0.08	1.41									800	0.584			0.63	0.81396
-33	151.875	20191207	15	2019-12-08 01:00:00	0.25	6183.1	0.7	0.06	1.41									709	0.482			0.89	1.14988
-33	151.875	20191207	16	2019-12-08 02:00:00	0.25	4866.73	0.57	0.05	1.41									584	0.569			1.28	1.65376
-33	151.875	20191207	17	2019-12-08 03:00:00	0.24	4036.71	0.48	0.04	1.41									482	0.321			1.93	2.49356
-33	151.875	20191207	18	2019-12-08 04:00:00	0.23	3509.13	0.42	0.03	1.41									569	0.208			2.77	3.57884
-33	151.875	20191207	19	2019-12-08 05:00:00	0.22	3185.66	0.39	0.03	1.41									321	0.226			3.31	4.27652
-33	151.875	20191207	20	2019-12-08 06:00:00	0.21	3012.29	0.38	0.03	1.41									208	0.305			3.72	4.80624
-33	151.875	20191207	21	2019-12-08 07:00:00	0.2	2879.63	0.39	0.03	1.41									226	0.396			3.66	4.72872
-33	151.875	20191207	22	2019-12-08 08:00:00	0.23	2684.72	0.4	0.03	1.42									305	0.474			2.12	2.73904
-33	151.875	20191207	23	2019-12-08 09:00:00	0.28	2405.57	0.39	0.02	1.43									396	0.487			0.64	0.82688
-33	151.875	20191208	0	2019-12-08 10:00:00	0.57	15319	1.41	0.14	1.41									474	0.474			0.46	0.59432
-33	151.875	20191208	1	2019-12-08 11:00:00	0.58	16467.6	1.54	0.16	1.41									487	0.45			0.45	0.5814
-33	151.875	20191208	2	2019-12-08 12:00:00	0.55	17258.6	1.65	0.16	1.41									474	0.41			0.72	0.93024
-33	151.875	20191208	3	2019-12-08 13:00:00	0.3	5550.41	0.59	0.05	1.42									450	0.395			0.83	1.07236
-33	151.875	20191208	4	2019-12-08 14:00:00	0.29	7346.32	0.73	0.07	1.41									410	0.329			1.02	1.31784
-33	151.875	20191208	5	2019-12-08 15:00:00	0.29	8764.07	0.84	0.08	1.41									395	0.295			1.11	1.43412
-33	151.875	20191208	6	2019-12-08 16:00:00	0.29	9815.52	0.93	0.09	1.41									329	0.264			0.94	1.21448
-33	151.875	20191208	7	2019-12-08 17:00:00	0.29	10565.4	0.99	0.1	1.4									295	0.22			0.89	1.14988
-33	151.875	20191208	8	2019-12-08 18:00:00	0.28	11005.2	1.03	0.1	1.4									264	0.225			0.78	1.00776
-33	151.875	20191208	9	2019-12-08 19:00:00	0.26	10969.4	1.03	0.1	1.4									220	0.256			0.85	1.0982
-33	151.875	20191208	10	2019-12-08 20:00:00	0.23	10591.4	1	0.1	1.4									225	0.222			0.8	1.0336
-33	151.875	20191208	11	2019-12-08 21:00:00	0.2	10227.6	0.97	0.1	1.4									256	0.233			0.54	0.69768
-33	151.875	20191208	12	2019-12-08 22:00:00	0.17	10015.6	0.95	0.09	1.4									222	0.2			0.35	0.4522
-33	151.875	20191208	13	2019-12-08 23:00:00	0.16	9900.24	0.93	0.09	1.4									233	0.217			0.91	1.17572
-33	151.875	20191208	14	2019-12-09 00:00:00	0.15	9766.92	0.92	0.09	1.4									200	0.498			2.52	3.25584
-33	151.875	20191208	15	2019-12-09 01:00:00	0.15	9604.61	0.9	0.09	1.4									217	0.298			2.95	3.8114
-33	151.875	20191208	16	2019-12-09 02:00:00	0.17	9439.63	0.89	0.09	1.4									498	0.231			2.66	3.43672
-33	151.875	20191208	17	2019-12-09 03:00:00	0.19	9286.1	0.88	0.09	1.41									298	0.229			2.38	3.07496
-33	151.875	20191208	18	2019-12-09 04:00:00	0.21	9123.19	0.86	0.09	1.41									231	0.609			2.35	3.0362
-33	151.875	20191208	19	2019-12-09 05:00:00	0.22	8972.2	0.84	0.08	1.41									229	0.551			2.21	2.85532
-33	151.875	20191208	20	2019-12-09 06:00:00	0.21	8831.95	0.83	0.08	1.41									609	0.302			1.67	2.15764
-33	151.875	20191208	21	2019-12-09 07:00:00	0.26	8639.67	0.81	0.08	1.41									551	0.563			1.25	1.615
-33	151.875	20191208	22	2019-12-09 08:00:00	0.33	8276.51	0.78	0.08	1.41									302	0.51			1.25	1.615
-33	151.875	20191208	23	2019-12-09 09:00:00	0.43	7663.01	0.72	0.07	1.41									563	0.442			1.2	1.5504
-33	151.875	20191209	0	2019-12-09 10:00:00	0.48	9182.47	0.82	0.09	1.41									510	0.336			0.64	0.82688
-33	151.875	20191209	1	2019-12-09 11:00:00	0.53	8744.01	0.77	0.08	1.4									442	0.421			0.46	0.59432
-33	151.875	20191209	2	2019-12-09 12:00:00	0.56	8071.81	0.71	0.08	1.4									336	0.332			0.5	0.646
-33	151.875	20191209	3	2019-12-09 13:00:00	0.8	9963.57	0.86	0.09	1.4									421	0			0.38	0.49096
-33	151.875	20191209	4	2019-12-09 14:00:00	1.08	9992.85	0.87	0.09	1.4									332	0.341			0.4	0.5168
-33	151.875	20191209	5	2019-12-09 15:00:00	1.18	10755.6	0.93	0.1	1.4										0.436			0.41	0.52972
-33	151.875	20191209	6	2019-12-09 16:00:00	0.99	12847.1	1.09	0.12	1.4									341	0.459			0.49	0.63308
-33	151.875	20191209	7	2019-12-09 17:00:00	0.72	16899.1	1.41	0.16	1.4									436	0.482			0.68	0.87856
-33	151.875	20191209	8	2019-12-09 18:00:00	0.6	22271.9	1.87	0.21	1.4									459	0.557			0.83	1.07236
-33	151.875	20191209	9	2019-12-09 19:00:01	0.56	27598.5	2.36	0.26	1.4									482	0.611			1.01	1.30492
-33	151.875	20191209	10	2019-12-09 20:00:01	0.51	31338.7	2.75	0.29	1.4									557	0.609			1.69	2.18348
-33	151.875	20191209	11	2019-12-09 21:00:01	0.49	31787.8	2.85	0.3	1.4									611	0.627			5.93	7.66156
-33	151.875	20191209	12	2019-12-09 22:00:01	0.5	29060.2	2.63	0.27	1.4									609	0.851			6.99	9.03108
-33	151.875	20191209	13	2019-12-09 23:00:01	0.52	24709.1	2.23	0.23	1.4									627	1.108			1.62	2.09304
-33	151.875	20191209	14	2019-12-10 00:00:01	0.54	20104.2	1.81	0.19	1.4									851	0.913			0.47	0.60724
-33	151.875	20191209	15	2019-12-10 01:00:01	0.57	15991.6	1.43	0.15	1.4									1108	0.797			0.14	0.18088
-33	151.875	20191209	16	2019-12-10 02:00:01	0.6	12927.7	1.15	0.12	1.4									913	0.63			0.1	0.1292
-33	151.875	20191209	17	2019-12-10 03:00:01	0.66	11051.4	0.98	0.1	1.4									797	0.618			0.92	1.18864
-33	151.875	20191209	18	2019-12-10 04:00:01	0.77	10176	0.9	0.1	1.4									630	0.693			1.68	2.17056
-33	151.875	20191209	19	2019-12-10 05:00:01	1.02	9786.63	0.85	0.09	1.4									618	1.215			2.13	2.75196
-33	151.875	20191209	20	2019-12-10 06:00:01	1.42	9586.89	0.82	0.09	1.4									693	3.446			2.45	3.1654
-33	151.875	20191209	21	2019-12-10 07:00:01	1.79	9270.76	0.77	0.09	1.4									1215	3.851			2.38	3.07496
-33	151.875	20191209	22	2019-12-10 08:00:01	2.24	8613.25	0.71	0.08	1.4									3446	6.544			1.73	2.23516
-33	151.875	20191209	23	2019-12-10 09:00:01	2.72	7730.8	0.63	0.07	1.4									3851	10.088			0.92	1.18864
-33	151.875	20191210	0	2019-12-10 10:00:01	0.34	14705	1.14	0.14	1.4									6544	5.308			0.64	0.82688
-33	151.875	20191210	1	2019-12-10 11:00:01	1.19	13733.5	1.07	0.13	1.4									10088	3.139			0.19	0.24548
-33	151.875	20191210	2	2019-12-10 12:00:01	2.07	14202.9	1.11	0.13	1.4									5308	3.904			0.06	0.07752
-33	151.875	20191210	3	2019-12-10 13:00:01	2.6	21857.5	1.79	0.2	1.4									3139	3.335			0.03	0.03876
-33	151.875	20191210	4	2019-12-10 14:00:01	3.42	29794	2.5	0.28	1.4									3904	3.377			0.02	0.02584
-33	151.875	20191210	5	2019-12-10 15:00:01	3.45	39506.2	3.45	0.37	1.4									3335	3.822			0.02	0.02584
-33	151.875	20191210	6	2019-12-10 16:00:01	2.66	49065.9	5.29	0.47	1.41									3377	3.449			0.01	0.01292
-33	151.875	20191210	7	2019-12-10 17:00:01	1.47	52834.6	8.42	0.53	1.44									3822	3.193			0	0
-33	151.875	20191210	8	2019-12-10 18:00:01	0.66	50780.4	9.75	0.53	1.46									3449	2.727			0	0
-33	151.875	20191210	9	2019-12-10 19:00:01	0.58	46640.3	9.29	0.49	1.46									3193	3.97			0	0
-33	151.875	20191210	10	2019-12-10 20:00:01	0.86	40847.7	7.99	0.43	1.46									2727	0.846			0	0
-33	151.875	20191210	11	2019-12-10 21:00:01	0.83	33873.1	6.85	0.36	1.46									3970	0.638			0	0
-33	151.875	20191210	12	2019-12-10 22:00:01	0.9	26359.7	5.31	0.28	1.46									846	0.328			0.01	0.01292
-33	151.875	20191210	13	2019-12-10 23:00:01	0.73	18910.7	3.57	0.2	1.44									638	0.182			0.01	0.01292
-33	151.875	20191210	14	2019-12-11 00:00:01	0.44	11938.6	2.12	0.12	1.44									328	0.155			0.01	0.01292
-33	151.875	20191210	15	2019-12-11 01:00:01	0.31	6803.1	1.24	0.07	1.44									182	0.143			0.01	0.01292
-33	151.875	20191210	16	2019-12-11 02:00:01	0.26	4134.35	0.75	0.04	1.44									155	0.149			0.02	0.02584
-33	151.875	20191210	17	2019-12-11 03:00:01	0.24	3107.92	0.59	0.03	1.44									143	0.143			0.02	0.02584
-33	151.875	20191210	18	2019-12-11 04:00:01	0.24	3001.15	0.58	0.03	1.44									149	0.146			0.03	0.03876
-33	151.875	20191210	19	2019-12-11 05:00:01	0.24	3136.67	0.61	0.03	1.44									143	0.188			0.02	0.02584
-33	151.875	20191210	20	2019-12-11 06:00:01	0.24	3122.11	0.62	0.03	1.45									146	0.249			0.02	0.02584
-33	151.875	20191210	21	2019-12-11 07:00:01	0.25	2688.33	0.52	0.03	1.44									188	0.375			0.01	0.01292
-33	151.875	20191210	22	2019-12-11 08:00:01	0.26	2033.81	0.41	0.02	1.43									249	0.427			0	0
-33	151.875	20191210	23	2019-12-11 09:00:01	0.26	1560.14	0.35	0.02	1.44									375	0.374			0	0
-33	151.875	20191211	0	2019-12-11 10:00:01	0.36	2786.19	0.46	0.03	1.42									427	0.406			0	0
-33	151.875	20191211	1	2019-12-11 11:00:01	0.38	2903.51	0.46	0.03	1.42									374	0.35			0.01	0.01292
-33	151.875	20191211	2	2019-12-11 12:00:01	0.4	3160.23	0.47	0.03	1.42									406	0.371			0	0
-33	151.875	20191211	3	2019-12-11 13:00:01	0.4	4004.95	0.52	0.04	1.41									350	0.293			0	0
-33	151.875	20191211	4	2019-12-11 14:00:01	0.4	5145.6	0.6	0.05	1.41									371	0.255			0	0
-33	151.875	20191211	5	2019-12-11 15:00:01	0.38	6404.14	0.7	0.06	1.41									293	0.342			0	0
-33	151.875	20191211	6	2019-12-11 16:00:01	0.35	8957.97	0.92	0.08	1.41									255	0.372			0	0
-33	151.875	20191211	7	2019-12-11 17:00:01	0.3	11018	1.12	0.1	1.41									342	0.387			0	0
-33	151.875	20191211	8	2019-12-11 18:00:01	0.25	11700.1	1.21	0.11	1.41									372	0.519			0	0
-33	151.875	20191211	9	2019-12-11 19:00:01	0.23	10933.2	1.19	0.1	1.41									387	0.441			0	0
-33	151.875	20191211	10	2019-12-11 20:00:01	0.21	9249.14	1.07	0.09	1.41									519	0.404			0	0
-33	151.875	20191211	11	2019-12-11 21:00:01	0.19	7596.93	0.95	0.07	1.42									441	0.436			0	0
-33	151.875	20191211	12	2019-12-11 22:00:01	0.18	6434.9	0.91	0.06	1.42									404	0.543			0	0
-33	151.875	20191211	13	2019-12-11 23:00:01	0.19	5699.57	0.92	0.06	1.43									436	0.593			0.01	0.01292
-33	151.875	20191211	14	2019-12-12 00:00:01	0.21	5207.95	0.98	0.05	1.45									543	0.321			0.01	0.01292
-33	151.875	20191211	15	2019-12-12 01:00:01	0.25	4842.52	1.05	0.05	1.46									593	0.327			0.01	0.01292
-33	151.875	20191211	16	2019-12-12 02:00:01	0.29	4537.43	1.01	0.05	1.46									321	0.457			0.01	0.01292
-33	151.875	20191211	17	2019-12-12 03:00:01	0.33	4212.54	0.89	0.04	1.46									327	0.473			0.01	0.01292
-33	151.875	20191211	18	2019-12-12 04:00:01	0.36	3864.4	0.78	0.04	1.45									457	0.602			0.01	0.01292
-33	151.875	20191211	19	2019-12-12 05:00:01	0.37	3486.31	0.69	0.04	1.45									473	0.54			0.01	0.01292
-33	151.875	20191211	20	2019-12-12 06:00:01	0.38	3144.38	0.64	0.03	1.46									602	0.671			0.02	0.02584
-33	151.875	20191211	21	2019-12-12 07:00:01	0.42	2796.23	0.64	0.03	1.47									540	0.559			0.02	0.02584
-33	151.875	20191211	22	2019-12-12 08:00:01	0.47	2454.33	0.57	0.03	1.47									671	0.506			0.02	0.02584
-33	151.875	20191211	23	2019-12-12 09:00:01	0.46	2154.47	0.47	0.02	1.46									559	0.405			0.03	0.03876
-33	151.875	20191212	0	2019-12-12 10:00:01	0.47	2582.62	0.51	0.03	1.46									506	0.404			0.04	0.05168
-33	151.875	20191212	1	2019-12-12 11:00:01	0.44	2762.93	0.53	0.03	1.45									405	0.408			0.04	0.05168
-33	151.875	20191212	2	2019-12-12 12:00:01	0.4	3148.89	0.54	0.03	1.44									404	0.374			0.04	0.05168
-33	151.875	20191212	3	2019-12-12 13:00:01	0.39	5509.5	0.79	0.05	1.43									408	0.33			0.04	0.05168
-33	151.875	20191212	4	2019-12-12 14:00:01	0.36	8740.7	1.08	0.08	1.42									374	0.387			0.04	0.05168
-33	151.875	20191212	5	2019-12-12 15:00:01	0.34	11951.8	1.37	0.11	1.41									330	0.44			0.04	0.05168
-33	151.875	20191212	6	2019-12-12 16:00:01	0.31	14795.6	1.65	0.14	1.41									387	0.418			0.04	0.05168
-33	151.875	20191212	7	2019-12-12 17:00:01	0.28	17112.8	1.89	0.16	1.41									440	0.527			0.04	0.05168
-33	151.875	20191212	8	2019-12-12 18:00:01	0.28	17871	2.02	0.17	1.41									418	0.409			0.03	0.03876
-33	151.875	20191212	9	2019-12-12 19:00:01	0.28	17209.4	2.01	0.16	1.41									527	0.396			0.02	0.02584
-33	151.875	20191212	10	2019-12-12 20:00:01	0.26	15780.2	1.85	0.15	1.41									409	0.351			0.03	0.03876
-33	151.875	20191212	11	2019-12-12 21:00:01	0.25	14004.1	1.66	0.13	1.41									396	0.367			0.03	0.03876
-33	151.875	20191212	12	2019-12-12 22:00:01	0.22	12215.4	1.5	0.12	1.42									351	0.397			0.04	0.05168
-33	151.875	20191212	13	2019-12-12 23:00:01	0.2	10543	1.37	0.1	1.42									367	0.292			0.04	0.05168
-33	151.875	20191212	14	2019-12-13 00:00:01	0.17	8985.63	1.24	0.09	1.43									397	0.227			0.04	0.05168
-33	151.875	20191212	15	2019-12-13 01:00:01	0.14	7587.49	1.15	0.08	1.43									292	0.261			0.04	0.05168
-33	151.875	20191212	16	2019-12-13 02:00:01	0.12	6410.43	1.05	0.07	1.44									227	0.222			0.04	0.05168
-33	151.875	20191212	17	2019-12-13 03:00:01	0.11	5435.37	0.95	0.06	1.45									261	0.07			0.04	0.05168
-33	151.875	20191212	18	2019-12-13 04:00:01	0.1	4654.75	0.91	0.05	1.45									222	0.058			0.03	0.03876
-33	151.875	20191212	19	2019-12-13 05:00:01	0.1	4032.4	0.85	0.04	1.46									70	0.073			0.02	0.02584
-33	151.875	20191212	20	2019-12-13 06:00:01	0.1	3520.61	0.77	0.04	1.46									58	0.118			0.02	0.02584
-33	151.875	20191212	21	2019-12-13 07:00:01	0.11	3089.08	0.72	0.03	1.47									73	0.149			0.02	0.02584
-33	151.875	20191212	22	2019-12-13 08:00:01	0.14	2701.51	0.69	0.03	1.48									118	0.288			0.02	0.02584
-33	151.875	20191212	23	2019-12-13 09:00:01	0.16	2386.77	0.65	0.03	1.49									149	0.306			0.02	0.02584
-33	151.875	20191213	0	2019-12-13 10:00:01	0.22	3112.4	0.78	0.03	1.49									288	0.256			0.03	0.03876
-33	151.875	20191213	1	2019-12-13 11:00:01	0.2	2608.23	0.69	0.03	1.49									306	0.237			0.03	0.03876
-33	151.875	20191213	2	2019-12-13 12:00:01	0.19	2199.83	0.58	0.03	1.49									256	0.266			0.03	0.03876
-33	151.875	20191213	3	2019-12-13 13:00:01	0.18	1968.75	0.51	0.02	1.49									237	0.222			0.03	0.03876
-33	151.875	20191213	4	2019-12-13 14:00:01	0.16	2008.55	0.45	0.02	1.46									266	0.168			0.03	0.03876
-33	151.875	20191213	5	2019-12-13 15:00:01	0.14	2804.55	0.46	0.03	1.43									222	0.254			0.03	0.03876
-33	151.875	20191213	6	2019-12-13 16:00:01	0.14	4776.96	0.63	0.05	1.41									168	0.322			0.02	0.02584
-33	151.875	20191213	7	2019-12-13 17:00:01	0.13	7506.97	0.9	0.07	1.41									254	0.41			0.02	0.02584
-33	151.875	20191213	8	2019-12-13 18:00:01	0.13	10019.5	1.19	0.1	1.41									322	0.394			0.02	0.02584
-33	151.875	20191213	9	2019-12-13 19:00:01	0.13	11266.8	1.35	0.11	1.41									410	0.398			0.02	0.02584
-33	151.875	20191213	10	2019-12-13 20:00:01	0.13	11048.4	1.33	0.11	1.41									394	0.339			0.02	0.02584
-33	151.875	20191213	11	2019-12-13 21:00:01	0.14	9961.23	1.22	0.1	1.41									398	0.403			0.02	0.02584
-33	151.875	20191213	12	2019-12-13 22:00:01	0.14	8590.99	1.09	0.08	1.41									339	0.379			0.02	0.02584
-33	151.875	20191213	13	2019-12-13 23:00:01	0.15	7264.08	0.96	0.07	1.41									403	0.52			0.02	0.02584
-33	151.875	20191213	14	2019-12-14 00:00:01	0.16	6057.47	0.85	0.06	1.42									379	0.225			0.02	0.02584
-33	151.875	20191213	15	2019-12-14 01:00:01	0.16	4917.68	0.73	0.05	1.43									520	0.314			0.03	0.03876
-33	151.875	20191213	16	2019-12-14 02:00:01	0.16	3888.63	0.59	0.04	1.43									225	0.374			0.03	0.03876
-33	151.875	20191213	17	2019-12-14 03:00:01	0.17	3195.98	0.47	0.03	1.42									314	0.23			0.03	0.03876
-33	151.875	20191213	18	2019-12-14 04:00:01	0.17	2850.15	0.41	0.03	1.42									374	0.237			0.03	0.03876
-33	151.875	20191213	19	2019-12-14 05:00:01	0.18	2626.45	0.4	0.03	1.42									230	0.291			0.03	0.03876
-33	151.875	20191213	20	2019-12-14 06:00:01	0.18	2432.45	0.38	0.02	1.43									237	0.383			0.03	0.03876
-33	151.875	20191213	21	2019-12-14 07:00:01	0.19	2241.47	0.36	0.02	1.43									291	0.948			0.04	0.05168
-33	151.875	20191213	22	2019-12-14 08:00:01	0.2	2043.37	0.34	0.02	1.43									383	0.686			0.04	0.05168
-33	151.875	20191213	23	2019-12-14 09:00:01	0.22	1830.57	0.33	0.02	1.45									948	0.509			0.04	0.05168
-33	151.875	20191214	0	2019-12-14 10:00:01	0.39	2563.62	0.46	0.03	1.45									686	0.48			0.04	0.05168
-33	151.875	20191214	1	2019-12-14 11:00:01	0.48	2669.05	0.44	0.03	1.44									509	0.738			0.04	0.05168
-33	151.875	20191214	2	2019-12-14 12:00:01	0.5	2841.15	0.42	0.03	1.43									480	0.493			0.04	0.05168
-33	151.875	20191214	3	2019-12-14 13:00:01	0.67	4646.07	0.59	0.04	1.42									738	0.366			0.04	0.05168
-33	151.875	20191214	4	2019-12-14 14:00:01	0.66	5886.42	0.68	0.06	1.41									493	0.353			0.05	0.0646
-33	151.875	20191214	5	2019-12-14 15:00:01	0.61	7923.89	0.87	0.07	1.41									366	0.407			0.07	0.09044
-33	151.875	20191214	6	2019-12-14 16:00:01	0.49	11350.9	1.23	0.11	1.41									353	0.402			0.08	0.10336
-33	151.875	20191214	7	2019-12-14 17:00:01	0.39	15347.3	1.66	0.14	1.41									407	0.42			0.08	0.10336
-33	151.875	20191214	8	2019-12-14 18:00:01	0.34	17627.1	1.93	0.17	1.41									402	0.375			0.09	0.11628
-33	151.875	20191214	9	2019-12-14 19:00:01	0.31	17478.1	1.98	0.16	1.41									420	0.427			0.1	0.1292
-33	151.875	20191214	10	2019-12-14 20:00:01	0.3	15891	1.87	0.15	1.41									375	0.355			0.12	0.15504
-33	151.875	20191214	11	2019-12-14 21:00:01	0.29	13818.8	1.66	0.13	1.41									427	0.376			0.13	0.16796
-33	151.875	20191214	12	2019-12-14 22:00:01	0.28	11772.4	1.47	0.11	1.41									355	0.353			0.13	0.16796
-33	151.875	20191214	13	2019-12-14 23:00:01	0.29	9883.42	1.28	0.1	1.41									376	0.326			0.14	0.18088
-33	151.875	20191214	14	2019-12-15 00:00:01	0.29	8314.77	1.11	0.08	1.42									353	0.274			0.15	0.1938
-33	151.875	20191214	15	2019-12-15 01:00:01	0.3	7105.47	1	0.07	1.42									326	0.303			0.16	0.20672
-33	151.875	20191214	16	2019-12-15 02:00:01	0.31	6050.59	0.89	0.06	1.43									274	0.373			0.15	0.1938
-33	151.875	20191214	17	2019-12-15 03:00:01	0.33	4969.98	0.75	0.05	1.43									303	0.35			0.14	0.18088
-33	151.875	20191214	18	2019-12-15 04:00:01	0.34	4107.65	0.66	0.04	1.44									373	0.394			0.12	0.15504
-33	151.875	20191214	19	2019-12-15 05:00:01	0.34	3431.54	0.6	0.04	1.45									350	0.387			0.1	0.1292
-33	151.875	20191214	20	2019-12-15 06:00:01	0.35	2799.97	0.51	0.03	1.45									394	0.544			0.09	0.11628
-33	151.875	20191214	21	2019-12-15 07:00:01	0.33	2239.34	0.42	0.02	1.46									387	0.48			0.09	0.11628
-33	151.875	20191214	22	2019-12-15 08:00:01	0.35	1760.84	0.39	0.02	1.48									544	0.341			0.09	0.11628
-33	151.875	20191214	23	2019-12-15 09:00:01	0.38	1388.73	0.35	0.02	1.49									480	0.388			0.09	0.11628
-33	151.875	20191215	0	2019-12-15 10:00:01	0.53	2349.27	0.45	0.02	1.46									341	0.363			0.1	0.1292
-33	151.875	20191215	1	2019-12-15 11:00:01	0.56	3261.35	0.46	0.03	1.43									388	0.426			0	0
-33	151.875	20191215	2	2019-12-15 12:00:01	0.74	5376.97	0.67	0.05	1.42									363	0.391			0	0
-33	151.875	20191215	3	2019-12-15 13:00:01	1.48	9858.94	1.14	0.09	1.41									426	0.562			0	0
-33	151.875	20191215	4	2019-12-15 14:00:01	2.98	19101.4	2.07	0.18	1.41									391	0.613			0	0
-33	151.875	20191215	5	2019-12-15 15:00:01	4.45	33741.7	3.45	0.32	1.41									562	0.444			0	0
-33	151.875	20191215	6	2019-12-15 16:00:01	3.75	48761.6	4.76	0.46	1.4									613	0.39			0	0
-33	151.875	20191215	7	2019-12-15 17:00:01	2.32	56734.2	5.37	0.53	1.4									444	0.431			0	0
-33	151.875	20191215	8	2019-12-15 18:00:01	1.53	53799.4	4.98	0.5	1.4									390	0.493			0	0
-33	151.875	20191215	9	2019-12-15 19:00:01	1.14	41715.3	3.76	0.39	1.4									431	0.432			0	0
-33	151.875	20191215	10	2019-12-15 20:00:01	0.92	28841.1	2.57	0.27	1.4									493	0.802			0	0
-33	151.875	20191215	11	2019-12-15 21:00:01	0.82	19714.2	1.75	0.18	1.4									432	0.541			0	0
-33	151.875	20191215	12	2019-12-15 22:00:01	0.98	14331.1	1.26	0.13	1.4									802	0.851			0.11	0.14212
-33	151.875	20191215	13	2019-12-15 23:00:01	1.78	11578.2	1.02	0.11	1.4									541	0.752			0.5	0.646
-33	151.875	20191215	14	2019-12-16 00:00:01	2.97	9707.82	0.86	0.09	1.4									851	0.802			0.91	1.17572
-33	151.875	20191215	15	2019-12-16 01:00:01	3.96	7418.04	0.68	0.07	1.41									752	0.834			1.36	1.75712
-33	151.875	20191215	16	2019-12-16 02:00:01	4.56	4832.5	0.46	0.05	1.41									802	1.169			0.75	0.969
-33	151.875	20191215	17	2019-12-16 03:00:01	4.97	2897.07	0.3	0.03	1.41									834	2.4			0.64	0.82688
-33	151.875	20191215	18	2019-12-16 04:00:01	5.13	2003.31	0.22	0.02	1.42									1169	5.742			0.64	0.82688
-33	151.875	20191215	19	2019-12-16 05:00:01	4.59	1579.13	0.18	0.02	1.42									2400	2.414			0.67	0.86564
-33	151.875	20191215	20	2019-12-16 06:00:01	2.33	1223.1	0.19	0.01	1.44									5742	1.316			0.51	0.65892
-33	151.875	20191215	21	2019-12-16 07:00:01	0.68	861.79	0.21	0.01	1.46									2414	0.85			0.09	0.11628
-33	151.875	20191215	22	2019-12-16 08:00:01	0.31	635.9	0.23	0.01	1.48									1316	0.719			0.02	0.02584
-33	151.875	20191215	23	2019-12-16 09:00:01	0.21	543.6	0.22	0.01	1.48									850	0.469			0	0
-33	151.875	20191216	0	2019-12-16 10:00:01	0.2	685.92	0.26	0.01	1.47									719	0.284			0	0
-33	151.875	20191216	1	2019-12-16 11:00:01	0.17	643.43	0.26	0.01	1.46									469	0.305			0	0
-33	151.875	20191216	2	2019-12-16 12:00:01	0.15	863.01	0.26	0.01	1.43									284	0.308			0	0
-33	151.875	20191216	3	2019-12-16 13:00:01	0.51	4640.57	0.62	0.04	1.41									305	0			0	0
-33	151.875	20191216	4	2019-12-16 14:00:01	0.3	5633.76	0.63	0.05	1.41									308	0.265			0	0
-33	151.875	20191216	5	2019-12-16 15:00:01	0.18	6459.23	0.66	0.06	1.4										0.337			0	0
-33	151.875	20191216	6	2019-12-16 16:00:01	0.08	6943.78	0.7	0.06	1.4									265	0.262			0	0
-33	151.875	20191216	7	2019-12-16 17:00:01	0.04	7343.95	0.73	0.07	1.4									337	0.223			0	0
-33	151.875	20191216	8	2019-12-16 18:00:01	0.02	7004.01	0.7	0.07	1.4									262	0.184			0	0
-33	151.875	20191216	9	2019-12-16 19:00:01	0.02	5496.68	0.57	0.05	1.4									223	0.129			0	0
-33	151.875	20191216	10	2019-12-16 20:00:01	0.02	3617.23	0.41	0.03	1.4									184	0.134			0	0
-33	151.875	20191216	11	2019-12-16 21:00:01	0.02	2288.38	0.29	0.02	1.4									129	0.088			0	0
-33	151.875	20191216	12	2019-12-16 22:00:01	0.03	1558.78	0.22	0.01	1.4									134	0.076			0	0
-33	151.875	20191216	13	2019-12-16 23:00:01	0.03	1101.22	0.18	0.01	1.4									88	0.023			0	0
-33	151.875	20191216	14	2019-12-17 00:00:01	0.03	820.9	0.15	0.01	1.4									76	0.024			0	0
-33	151.875	20191216	15	2019-12-17 01:00:01	0.03	667.38	0.13	0.01	1.41									23	0.029			0	0
-33	151.875	20191216	16	2019-12-17 02:00:01	0.03	599.6	0.12	0.01	1.42									24	0.025			0	0
-33	151.875	20191216	17	2019-12-17 03:00:01	0.03	590.78	0.12	0.01	1.42									29	0.04			0	0
-33	151.875	20191216	18	2019-12-17 04:00:01	0.03	611.53	0.11	0.01	1.42									25	0.075			0	0
-33	151.875	20191216	19	2019-12-17 05:00:01	0.04	647.58	0.11	0.01	1.43									40	0.35			0	0
-33	151.875	20191216	20	2019-12-17 06:00:01	0.03	682.89	0.11	0.01	1.42									75	0.298			0	0
-33	151.875	20191216	21	2019-12-17 07:00:01	0.03	715.15	0.1	0.01	1.41									350	0.281			0	0
-33	151.875	20191216	22	2019-12-17 08:00:01	0.03	741.42	0.1	0.01	1.41									298	0.205			0	0
-33	151.875	20191216	23	2019-12-17 09:00:01	0.03	765.82	0.1	0.01	1.4									281	0.131			0	0
-33	151.875	20191217	0	2019-12-17 10:00:01	0	684.33	0.09	0.01	1.4									205	0.071			0	0
-33	151.875	20191217	1	2019-12-17 11:00:01	0.01	866.29	0.09	0.01	1.4									131	0.112			0	0
-33	151.875	20191217	2	2019-12-17 12:00:01	0.02	1079.45	0.11	0.01	1.4									71	0.083			0	0
-33	151.875	20191217	3	2019-12-17 13:00:01	0.48	2892.61	0.25	0.03	1.4									112	0.052			0	0
-33	151.875	20191217	4	2019-12-17 14:00:01	0.57	3424.63	0.28	0.03	1.4									83	0.067			0	0
-33	151.875	20191217	5	2019-12-17 15:00:01	0.66	3634.56	0.3	0.03	1.4									52	0.092			0	0
-33	151.875	20191217	6	2019-12-17 16:00:01	0.74	3596.69	0.3	0.03	1.4									67	0.102			0	0
-33	151.875	20191217	7	2019-12-17 17:00:01	0.81	3455.52	0.28	0.03	1.4									92	0.125			0	0
-33	151.875	20191217	8	2019-12-17 18:00:01	0.87	3359.05	0.27	0.03	1.4									102	0.093			0	0
-33	151.875	20191217	9	2019-12-17 19:00:01	0.93	3346.28	0.27	0.03	1.4									125	0.067			0	0
-33	151.875	20191217	10	2019-12-17 20:00:01	0.97	3366.75	0.27	0.03	1.4									93	0.092			0	0
-33	151.875	20191217	11	2019-12-17 21:00:01	1	3336.26	0.27	0.03	1.41									67	0.07			0	0
-33	151.875	20191217	12	2019-12-17 22:00:01	1.02	3200.63	0.26	0.03	1.41									92	0.068			0	0
-33	151.875	20191217	13	2019-12-17 23:00:01	1.04	2977.41	0.25	0.03	1.41									70	0.085			0	0
-33	151.875	20191217	14	2019-12-18 00:00:01	1.04	2737.22	0.24	0.03	1.41									68	0.171			0	0
-33	151.875	20191217	15	2019-12-18 01:00:01	1.04	2577.1	0.23	0.02	1.41									85	0.143			0	0
-33	151.875	20191217	16	2019-12-18 02:00:01	1.03	2542.26	0.23	0.02	1.41									171	0.156			0	0
-33	151.875	20191217	17	2019-12-18 03:00:02	1.01	2616.75	0.24	0.02	1.41									143	0.151			0.01	0.01292
-33	151.875	20191217	18	2019-12-18 04:00:02	0.99	2798.86	0.25	0.03	1.4									156	0.381			0.02	0.02584
-33	151.875	20191217	19	2019-12-18 05:00:02	0.97	3140.24	0.27	0.03	1.4									151	0.933			0.05	0.0646
-33	151.875	20191217	20	2019-12-18 06:00:02	0.97	3637.84	0.31	0.03	1.4									381	1.69			0.06	0.07752
-33	151.875	20191217	21	2019-12-18 07:00:02	1	4174.21	0.34	0.04	1.41									933	1.383			0.05	0.0646
-33	151.875	20191217	22	2019-12-18 08:00:02	0.96	4625.31	0.37	0.04	1.41									1690	0.313			0.02	0.02584
-33	151.875	20191217	23	2019-12-18 09:00:02	0.9	4927.11	0.39	0.05	1.41									1383	0.437			0.02	0.02584
-33	151.875	20191218	0	2019-12-18 10:00:02	0.5	3656.91	0.3	0.03	1.41									313	0.312			0.01	0.01292
-33	151.875	20191218	1	2019-12-18 11:00:02	0.48	3763.42	0.31	0.04	1.41									437	0.171			0.01	0.01292
-33	151.875	20191218	2	2019-12-18 12:00:02	0.49	4017.57	0.33	0.04	1.41									312	0.161			0.01	0.01292
-33	151.875	20191218	3	2019-12-18 13:00:02	0.43	3912.7	0.32	0.04	1.41									171	0.25			0.01	0.01292
-33	151.875	20191218	4	2019-12-18 14:00:02	0.51	4132.13	0.33	0.04	1.41									161	0.178			0.01	0.01292
-33	151.875	20191218	5	2019-12-18 15:00:02	0.58	4163.22	0.32	0.04	1.41									250	0.15			0	0
-33	151.875	20191218	6	2019-12-18 16:00:02	0.63	4347.86	0.32	0.04	1.41									178	0.216			0	0
-33	151.875	20191218	7	2019-12-18 17:00:02	0.67	4986.84	0.36	0.05	1.4									150	0.295			0	0
-33	151.875	20191218	8	2019-12-18 18:00:02	0.74	6179.07	0.45	0.06	1.4									216	0.332			0	0
-33	151.875	20191218	9	2019-12-18 19:00:02	0.84	8367.78	0.63	0.08	1.4									295	0.357			0	0
-33	151.875	20191218	10	2019-12-18 20:00:02	0.91	11661.1	0.94	0.11	1.4									332	0.184			0	0
-33	151.875	20191218	11	2019-12-18 21:00:02	0.91	14894.9	1.27	0.14	1.4									357	0.489			0.01	0.01292
-33	151.875	20191218	12	2019-12-18 22:00:02	0.87	16813.7	1.48	0.16	1.4									184	1.013			0.02	0.02584
-33	151.875	20191218	13	2019-12-18 23:00:02	0.85	17611.2	1.57	0.16	1.4									489	0.331			0.06	0.07752
-33	151.875	20191218	14	2019-12-19 00:00:02	0.87	18159.5	1.62	0.17	1.4									1013	0.319			0.43	0.55556
-33	151.875	20191218	15	2019-12-19 01:00:02	0.92	18882.4	1.67	0.18	1.4									331	0.972			1.04	1.34368
-33	151.875	20191218	16	2019-12-19 02:00:02	0.96	19957.2	1.74	0.19	1.4									319	0.498			1.49	1.92508
-33	151.875	20191218	17	2019-12-19 03:00:02	1.02	21448.1	1.85	0.2	1.4									972	0.528			1.87	2.41604
-33	151.875	20191218	18	2019-12-19 04:00:02	1.13	23176	1.97	0.22	1.4									498	1.262			2.23	2.88116
-33	151.875	20191218	19	2019-12-19 05:00:02	1.4	24808.6	2.09	0.23	1.4									528	2.095			2.49	3.21708
-33	151.875	20191218	20	2019-12-19 06:00:02	1.86	25887.7	2.17	0.24	1.4									1262	2.876			2.81	3.63052
-33	151.875	20191218	21	2019-12-19 07:00:02	2.7	25842.1	2.16	0.24	1.4									2095	1.993			2.71	3.50132
-33	151.875	20191218	22	2019-12-19 08:00:02	4.11	23622.5	1.96	0.22	1.4									2876	2.758			2.51	3.24292
-33	151.875	20191218	23	2019-12-19 09:00:02	5.2	19477.8	1.59	0.18	1.4									1993	3.518			2.02	2.60984
-33	151.875	20191219	0	2019-12-19 10:00:02	4.53	16353.9	1.33	0.15	1.4									2758	2.942			1.47	1.89924
-33	151.875	20191219	1	2019-12-19 11:00:02	4.3	13984.6	1.13	0.13	1.4									3518	3.397			1.06	1.36952
-33	151.875	20191219	2	2019-12-19 12:00:02	4.74	15005.6	1.2	0.14	1.4									2942	3.328			0.85	1.0982
-33	151.875	20191219	3	2019-12-19 13:00:02	4.58	16762	1.35	0.16	1.4									3397	3.111			0.78	1.00776
-33	151.875	20191219	4	2019-12-19 14:00:02	4.96	20330.8	1.68	0.19	1.4									3328	3.147			0.96	1.24032
-33	151.875	20191219	5	2019-12-19 15:00:02	5.24	25285.5	2.2	0.24	1.41									3111	2.948			1.06	1.36952
-33	151.875	20191219	6	2019-12-19 16:00:02	4.66	30053.9	2.79	0.28	1.41									3147	3.234			1.09	1.40828
-33	151.875	20191219	7	2019-12-19 17:00:02	3.18	31916.5	3.16	0.3	1.41									2948	2.517			0.91	1.17572
-33	151.875	20191219	8	2019-12-19 18:00:02	2.13	30933	3.14	0.29	1.41									3234	1.864			0.71	0.91732
-33	151.875	20191219	9	2019-12-19 19:00:02	1.73	28139.2	2.9	0.27	1.41									2517	1.858			0.6	0.7752
-33	151.875	20191219	10	2019-12-19 20:00:02	1.26	24242.7	2.47	0.23	1.41									1864	0.489			0.56	0.72352
-33	151.875	20191219	11	2019-12-19 21:00:02	0.88	20219.7	1.99	0.19	1.41									1858	0.276			2.51	3.24292
-33	151.875	20191219	12	2019-12-19 22:00:02	0.61	16748.2	1.62	0.16	1.4									489	0.209			1.27	1.64084
-33	151.875	20191219	13	2019-12-19 23:00:02	0.42	14409.5	1.4	0.13	1.4									276	0.211			1.1	1.4212
-33	151.875	20191219	14	2019-12-20 00:00:02	0.3	12950.2	1.27	0.12	1.4									209	0.188			0.74	0.95608
-33	151.875	20191219	15	2019-12-20 01:00:02	0.24	11945.4	1.17	0.11	1.4									211	0.164			0.37	0.47804
-33	151.875	20191219	16	2019-12-20 02:00:02	0.22	10850.9	1.05	0.1	1.4									188	0.153			0.48	0.62016
-33	151.875	20191219	17	2019-12-20 03:00:02	0.21	9603.63	0.94	0.09	1.4									164	0.159			0.8	1.0336
-33	151.875	20191219	18	2019-12-20 04:00:02	0.21	8389.89	0.84	0.08	1.4									153	0.212			0.92	1.18864
-33	151.875	20191219	19	2019-12-20 05:00:02	0.19	7235.69	0.74	0.07	1.41									159	0.27			1.08	1.39536
-33	151.875	20191219	20	2019-12-20 06:00:02	0.18	6094.53	0.63	0.06	1.41									212	0.353			1.07	1.38244
-33	151.875	20191219	21	2019-12-20 07:00:02	0.16	5072.37	0.53	0.05	1.41									270	0.461			0.81	1.04652
-33	151.875	20191219	22	2019-12-20 08:00:02	0.16	4279.45	0.45	0.04	1.41									353	0.355			0.6	0.7752
-33	151.875	20191219	23	2019-12-20 09:00:02	0.15	3731.98	0.4	0.04	1.41									461	0.231			0.45	0.5814
-33	151.875	20191220	0	2019-12-20 10:00:02	0.12	3011.89	0.34	0.03	1.41									355	0.213			0.35	0.4522
-33	151.875	20191220	1	2019-12-20 11:00:02	0.13	3001.07	0.33	0.03	1.41									231	0.191			0.29	0.37468
-33	151.875	20191220	2	2019-12-20 12:00:02	0.17	2972.18	0.33	0.03	1.41									213	0.215			0.3	0.3876
-33	151.875	20191220	3	2019-12-20 13:00:02	0.2	3170.25	0.34	0.03	1.41									191	0.16			0.28	0.36176
-33	151.875	20191220	4	2019-12-20 14:00:02	0.31	4537.65	0.45	0.04	1.41									215	0.209			0.31	0.40052
-33	151.875	20191220	5	2019-12-20 15:00:02	0.46	6208.45	0.58	0.06	1.41									160	0.235			0.33	0.42636
-33	151.875	20191220	6	2019-12-20 16:00:02	0.57	7919.97	0.72	0.07	1.41									209	0.255			0.3	0.3876
-33	151.875	20191220	7	2019-12-20 17:00:02	0.71	9958.31	0.89	0.09	1.4									235	0.201			0.27	0.34884
-33	151.875	20191220	8	2019-12-20 18:00:02	0.83	10959	0.97	0.1	1.4									255	0.162			0.31	0.40052
-33	151.875	20191220	9	2019-12-20 19:00:02	0.91	10963.1	0.97	0.1	1.4									201	0.188			0.39	0.50388
-33	151.875	20191220	10	2019-12-20 20:00:02	0.97	10440.8	0.93	0.1	1.4									162	0.262			0.56	0.72352
-33	151.875	20191220	11	2019-12-20 21:00:02	1.02	10024.1	0.9	0.09	1.41									188	0.369			0.73	0.94316
-33	151.875	20191220	12	2019-12-20 22:00:02	1.02	9899.24	0.89	0.09	1.41									262	0.478			0.78	1.00776
-33	151.875	20191220	13	2019-12-20 23:00:02	1	9947.37	0.9	0.09	1.41									369	0.586			0.78	1.00776
-33	151.875	20191220	14	2019-12-21 00:00:02	0.95	10081.7	0.91	0.09	1.41									478	0.556			0.74	0.95608
-33	151.875	20191220	15	2019-12-21 01:00:02	0.89	10433.1	0.94	0.1	1.41									586	0.637			0.66	0.85272
-33	151.875	20191220	16	2019-12-21 02:00:02	0.84	11120.1	0.99	0.1	1.41									556	0.582			0.58	0.74936
-33	151.875	20191220	17	2019-12-21 03:00:02	0.8	12183.9	1.08	0.11	1.41									637	0.669			0.54	0.69768
-33	151.875	20191220	18	2019-12-21 04:00:02	0.77	13416.6	1.18	0.13	1.41									582	0.695			0.51	0.65892
-33	151.875	20191220	19	2019-12-21 05:00:02	0.74	14422.1	1.27	0.13	1.4									669	0.739			0.51	0.65892
-33	151.875	20191220	20	2019-12-21 06:00:02	0.72	14765.6	1.3	0.14	1.4									695	0.974			0.59	0.76228
-33	151.875	20191220	21	2019-12-21 07:00:02	0.83	14221.7	1.26	0.13	1.4									739	1.025			0.9	1.1628
-33	151.875	20191220	22	2019-12-21 08:00:02	1.13	13108.3	1.17	0.12	1.4									974	0.914			1.42	1.83464
-33	151.875	20191220	23	2019-12-21 09:00:02	1.52	12005.9	1.07	0.11	1.4									1025	0.97			1.64	2.11888
-33	151.875	20191221	0	2019-12-21 10:00:02	2.25	13737.2	1.22	0.13	1.4									914	1.411			1.63	2.10596
-33	151.875	20191221	1	2019-12-21 11:00:02	2.76	12838.7	1.13	0.12	1.4									970	1.404			1.45	1.8734
-33	151.875	20191221	2	2019-12-21 12:00:02	3.85	13915.9	1.19	0.13	1.4									1411	1.605			1.17	1.51164
-33	151.875	20191221	3	2019-12-21 13:00:02	2.77	12815.2	1.09	0.12	1.4									1404	1.377			1.14	1.47288
-33	151.875	20191221	4	2019-12-21 14:00:02	3.49	17732.7	1.5	0.16	1.4									1605	1.153			1.1	1.4212
-33	151.875	20191221	5	2019-12-21 15:00:02	4.62	27256.1	2.31	0.25	1.4									1377	1.084			1.05	1.3566
-33	151.875	20191221	6	2019-12-21 16:00:02	5.48	47818.3	4.06	0.44	1.4									1153	1.011			0.99	1.27908
-33	151.875	20191221	7	2019-12-21 17:00:02	5.44	79260.3	7.06	0.74	1.4									1084	0.718			0.96	1.24032
-33	151.875	20191221	8	2019-12-21 18:00:02	5.22	102746	10.32	0.97	1.41									1011	0.823			0.94	1.21448
-33	151.875	20191221	9	2019-12-21 19:00:02	3.18	100067	10.88	0.95	1.41									718	0.912			0.87	1.12404
-33	151.875	20191221	10	2019-12-21 20:00:02	1.28	79088.7	8.88	0.76	1.42									823	1.006			0.85	1.0982
-33	151.875	20191221	11	2019-12-21 21:00:02	0.8	56170.7	6.19	0.54	1.41									912	0.996			0.95	1.2274
-33	151.875	20191221	12	2019-12-21 22:00:02	0.62	39482.1	4.05	0.37	1.41									1006	0.613			1	1.292
-33	151.875	20191221	13	2019-12-21 23:00:02	0.49	28902.2	2.83	0.27	1.4									996	0.218			0.94	1.21448
-33	151.875	20191221	14	2019-12-22 00:00:02	0.38	22248.4	2.23	0.21	1.4									613	0.104			0.82	1.05944
-33	151.875	20191221	15	2019-12-22 01:00:02	0.29	18067.9	1.9	0.17	1.41									218	0.041			0.78	1.00776
-33	151.875	20191221	16	2019-12-22 02:00:02	0.22	14857	1.64	0.14	1.41									104	0.079			0.79	1.02068
-33	151.875	20191221	17	2019-12-22 03:00:02	0.16	12037.5	1.39	0.11	1.41									41	0.034			0.76	0.98192
-33	151.875	20191221	18	2019-12-22 04:00:02	0.13	9732.25	1.17	0.09	1.41									79	0.042			0.76	0.98192
-33	151.875	20191221	19	2019-12-22 05:00:02	0.1	8011.75	0.99	0.08	1.41									34	0.045			1.55	2.0026
-33	151.875	20191221	20	2019-12-22 06:00:02	0.09	6964.63	0.88	0.07	1.41									42	0.043			0.91	1.17572
-33	151.875	20191221	21	2019-12-22 07:00:02	0.08	6219.56	0.79	0.06	1.41									45	0.062			0.66	0.85272
-33	151.875	20191221	22	2019-12-22 08:00:02	0.08	5332.49	0.68	0.05	1.42									43	0.09			0.61	0.78812
-33	151.875	20191221	23	2019-12-22 09:00:02	0.09	4283.6	0.56	0.04	1.42									62	0.129			0.37	0.47804
-33	151.875	20191222	0	2019-12-22 10:00:02	0.04	3178.24	0.43	0.03	1.42									90	0.19			0.17	0.21964
-33	151.875	20191222	1	2019-12-22 11:00:02	0.04	3424.2	0.48	0.03	1.43									129	0.177			0.05	0.0646
-33	151.875	20191222	2	2019-12-22 12:00:02	0.05	4787.21	0.72	0.05	1.44									190	0.249			0.04	0.05168
-33	151.875	20191222	3	2019-12-22 13:00:02	0.13	7528.23	1.22	0.08	1.45									177	0.292			0.01	0.01292
-33	151.875	20191222	4	2019-12-22 14:00:02	0.22	8145.62	1.32	0.08	1.45									249	0.216			0.02	0.02584
-33	151.875	20191222	5	2019-12-22 15:00:02	0.35	7914.01	1.08	0.08	1.43									292	0.132			0.02	0.02584
-33	151.875	20191222	6	2019-12-22 16:00:02	0.52	6173.87	0.72	0.06	1.42									216	0.18			0.02	0.02584
-33	151.875	20191222	7	2019-12-22 17:00:02	0.58	7186.34	0.8	0.07	1.42									132	0.157			0.02	0.02584
-33	151.875	20191222	8	2019-12-22 18:00:02	0.65	8937.43	1.03	0.09	1.42									180	0.128			0.02	0.02584
-33	151.875	20191222	9	2019-12-22 19:00:02	0.73	10587.8	1.26	0.1	1.42									157	0.137			0.02	0.02584
-33	151.875	20191222	10	2019-12-22 20:00:02	0.84	10803.4	1.33	0.11	1.42									128	0.13			0.02	0.02584
-33	151.875	20191222	11	2019-12-22 21:00:02	0.97	9302.12	1.22	0.09	1.43									137	0.118			0.02	0.02584
-33	151.875	20191222	12	2019-12-22 22:00:02	1.07	7436.53	1.02	0.07	1.43									130	0.14			0.02	0.02584
-33	151.875	20191222	13	2019-12-22 23:00:02	1.12	6388.37	0.88	0.06	1.43									118	0.074			0.02	0.02584
-33	151.875	20191222	14	2019-12-23 00:00:02	1.1	5980.35	0.83	0.06	1.44									140	0.046			0.02	0.02584
-33	151.875	20191222	15	2019-12-23 01:00:02	1.02	5801.59	0.84	0.06	1.44									74	0.055			0.02	0.02584
-33	151.875	20191222	16	2019-12-23 02:00:02	0.91	5554.2	0.83	0.06	1.44									46	0.058			0.02	0.02584
-33	151.875	20191222	17	2019-12-23 03:00:02	0.8	5290.44	0.82	0.05	1.44									55	0.059			0.01	0.01292
-33	151.875	20191222	18	2019-12-23 04:00:02	0.72	5142.3	0.85	0.05	1.45									58	0.085			0.01	0.01292
-33	151.875	20191222	19	2019-12-23 05:00:02	0.67	5071.19	0.85	0.05	1.45									59	0.133			0.02	0.02584
-33	151.875	20191222	20	2019-12-23 06:00:02	0.61	4910.61	0.83	0.05	1.45									85	0.181			0.02	0.02584
-33	151.875	20191222	21	2019-12-23 07:00:02	0.55	4582.18	0.76	0.05	1.45									133	0.209			0.02	0.02584
-33	151.875	20191222	22	2019-12-23 08:00:02	0.52	4181.43	0.69	0.04	1.44									181	0.231			0.03	0.03876
-33	151.875	20191222	23	2019-12-23 09:00:02	0.51	3859.47	0.66	0.04	1.44									209	0.272			0.03	0.03876
-33	151.875	20191223	0	2019-12-23 10:00:02	0.59	4450.19	0.77	0.05	1.44									231	0.182			0.04	0.05168
-33	151.875	20191223	1	2019-12-23 11:00:02	0.56	4244.19	0.71	0.04	1.44									272	0.254			0.07	0.09044
-33	151.875	20191223	2	2019-12-23 12:00:02	0.5	3836.29	0.66	0.04	1.44									182	0.324			0.1	0.1292
-33	151.875	20191223	3	2019-12-23 13:00:02	0.39	2307.31	0.45	0.02	1.46									254	0			0.13	0.16796
-33	151.875	20191223	4	2019-12-23 14:00:02	0.36	2253.4	0.41	0.02	1.45									324	0.26			0.12	0.15504
-33	151.875	20191223	5	2019-12-23 15:00:02	0.34	2531.95	0.43	0.03	1.44										0.289			0.07	0.09044
-33	151.875	20191223	6	2019-12-23 16:00:02	0.3	3100.3	0.46	0.03	1.43									260	0.298			0.04	0.05168
-33	151.875	20191223	7	2019-12-23 17:00:02	0.27	3939.24	0.52	0.04	1.42									289	0.294			0.03	0.03876
-33	151.875	20191223	8	2019-12-23 18:00:02	0.24	4994.11	0.59	0.05	1.41									298	0.426			0.03	0.03876
-33	151.875	20191223	9	2019-12-23 19:00:02	0.22	6161.48	0.68	0.06	1.41									294	0.349			0.03	0.03876
-33	151.875	20191223	10	2019-12-23 20:00:02	0.21	7310.96	0.78	0.07	1.41									426	0.304			0.03	0.03876
-33	151.875	20191223	11	2019-12-23 21:00:02	0.21	8338.71	0.88	0.08	1.41									349	0.202			0.03	0.03876
-33	151.875	20191223	12	2019-12-23 22:00:02	0.21	9004.72	0.96	0.08	1.41									304	0.333			0.03	0.03876
-33	151.875	20191223	13	2019-12-23 23:00:02	0.22	9324.38	1.01	0.09	1.41									202	0.4			0.03	0.03876
-33	151.875	20191223	14	2019-12-24 00:00:02	0.25	9398.52	1.04	0.09	1.41									333	0.126			0.03	0.03876
-33	151.875	20191223	15	2019-12-24 01:00:02	0.28	9320.3	1.05	0.09	1.41									400	0.118			0.04	0.05168
-33	151.875	20191223	16	2019-12-24 02:00:02	0.31	9186.26	1.06	0.09	1.41									126	0.139			0.07	0.09044
-33	151.875	20191223	17	2019-12-24 03:00:02	0.33	9100.61	1.08	0.09	1.41									118	0.115			0.13	0.16796
-33	151.875	20191223	18	2019-12-24 04:00:02	0.32	9137.82	1.12	0.09	1.42									139	0.126			0.18	0.23256
-33	151.875	20191223	19	2019-12-24 05:00:02	0.33	9197.45	1.14	0.09	1.41									115	0.207			0	0
-33	151.875	20191223	20	2019-12-24 06:00:02	0.32	9119.33	1.14	0.09	1.41									126	0.295			0	0
-33	151.875	20191223	21	2019-12-24 07:00:02	0.34	8929.18	1.15	0.09	1.41									207	0.29			0	0
-33	151.875	20191223	22	2019-12-24 08:00:02	0.4	8758.12	1.19	0.09	1.42									295	0.334			0	0
-33	151.875	20191223	23	2019-12-24 09:00:02	0.47	8613.45	1.26	0.09	1.42									290	0.349			0	0
-33	151.875	20191224	0	2019-12-24 10:00:02	0.55	8498.26	1.24	0.08	1.43									334	0.292			0	0
-33	151.875	20191224	1	2019-12-24 11:00:02	0.61	9191.77	1.29	0.09	1.42									349	0.308			0	0
-33	151.875	20191224	2	2019-12-24 12:00:02	0.6	9698.66	1.34	0.09	1.42									292	0.319			0.01	0.01292
-33	151.875	20191224	3	2019-12-24 13:00:02	0.56	5374.16	0.83	0.05	1.44									308	0.283			0.01	0.01292
-33	151.875	20191224	4	2019-12-24 14:00:02	0.54	5346.49	0.78	0.05	1.43									319	0.317			0	0
-33	151.875	20191224	5	2019-12-24 15:00:02	0.46	5438.19	0.76	0.05	1.42									283	0.377			0	0
-33	151.875	20191224	6	2019-12-24 16:00:02	0.42	5562.75	0.76	0.05	1.42									317	0.329			0	0
-33	151.875	20191224	7	2019-12-24 17:00:02	0.38	5689.25	0.78	0.05	1.42									377	0.349			0	0
-33	151.875	20191224	8	2019-12-24 18:00:02	0.36	5719.26	0.76	0.05	1.41									329	0.327			0	0
-33	151.875	20191224	9	2019-12-24 19:00:02	0.4	5611.51	0.74	0.05	1.41									349	0.327			0	0
-33	151.875	20191224	10	2019-12-24 20:00:02	0.36	5363.38	0.69	0.05	1.41									327	0.316			0	0
-33	151.875	20191224	11	2019-12-24 21:00:02	0.34	5085.91	0.66	0.05	1.41									327	0.281			0	0
-33	151.875	20191224	12	2019-12-24 22:00:02	0.33	4829.06	0.62	0.05	1.41									316	0.307			0	0
-33	151.875	20191224	13	2019-12-24 23:00:02	0.33	4657.89	0.6	0.04	1.41									281	0.304			0	0
-33	151.875	20191224	14	2019-12-25 00:00:02	0.33	4546.22	0.58	0.04	1.41									307	0.27			0	0
-33	151.875	20191224	15	2019-12-25 01:00:02	0.33	4477.27	0.57	0.04	1.41									304	0.234			0	0
-33	151.875	20191224	16	2019-12-25 02:00:02	0.35	4419.28	0.56	0.04	1.41									270	0.203			0	0
-33	151.875	20191224	17	2019-12-25 03:00:02	0.36	4325.97	0.55	0.04	1.42									234	0.196			0	0
-33	151.875	20191224	18	2019-12-25 04:00:02	0.37	4187.06	0.53	0.04	1.42									203	0.168			0	0
-33	151.875	20191224	19	2019-12-25 05:00:02	0.39	4026.34	0.51	0.04	1.42									196	0.207			0	0
-33	151.875	20191224	20	2019-12-25 06:00:02	0.4	3881.54	0.49	0.04	1.42									168	0.263			0	0
-33	151.875	20191224	21	2019-12-25 07:00:02	0.4	3738.26	0.49	0.04	1.43									207	0.275			0	0
-33	151.875	20191224	22	2019-12-25 08:00:02	0.4	3594.86	0.49	0.04	1.43									263	0.344			0	0
-33	151.875	20191224	23	2019-12-25 09:00:02	0.39	3463.15	0.48	0.03	1.43									275	0.377			0	0
-33	151.875	20191225	0	2019-12-25 10:00:02	0.35	2689.88	0.41	0.03	1.44									344	0.382			0	0
-33	151.875	20191225	1	2019-12-25 11:00:02	0.34	2609.19	0.4	0.03	1.44									377	0.386			0	0
-33	151.875	20191225	2	2019-12-25 12:00:02	0.32	2537.16	0.38	0.03	1.43									382	0.453			0	0
-33	151.875	20191225	3	2019-12-25 13:00:02	0.36	2768.92	0.41	0.03	1.43									386	0.42			0	0
-33	151.875	20191225	4	2019-12-25 14:00:02	0.32	2684.61	0.38	0.03	1.42									453	0.374			0	0
-33	151.875	20191225	5	2019-12-25 15:00:02	0.27	2614.69	0.34	0.03	1.41									420	0.406			0	0
-33	151.875	20191225	6	2019-12-25 16:00:02	0.22	2573.98	0.33	0.02	1.41									374	0.376			0	0
-33	151.875	20191225	7	2019-12-25 17:00:02	0.19	2568.21	0.32	0.02	1.41									406	0.368			0	0
-33	151.875	20191225	8	2019-12-25 18:00:02	0.17	2585.5	0.32	0.02	1.41									376	0.39			0	0
-33	151.875	20191225	9	2019-12-25 19:00:02	0.15	2658.99	0.32	0.03	1.41									368	0.455			0	0
-33	151.875	20191225	10	2019-12-25 20:00:02	0.13	2841.7	0.34	0.03	1.41									390	0.431			0	0
-33	151.875	20191225	11	2019-12-25 21:00:02	0.13	3098.93	0.37	0.03	1.41									455	0.494			0	0
-33	151.875	20191225	12	2019-12-25 22:00:02	0.14	3259.83	0.38	0.03	1.41									431	0.551			0	0
-33	151.875	20191225	13	2019-12-25 23:00:02	0.16	3208.57	0.38	0.03	1.41									494	0.558			0	0
-33	151.875	20191225	14	2019-12-26 00:00:02	0.18	3032.75	0.36	0.03	1.41									551	0.394			0	0
-33	151.875	20191225	15	2019-12-26 01:00:02	0.19	2847.8	0.36	0.03	1.41									558	0.484			0	0
-33	151.875	20191225	16	2019-12-26 02:00:02	0.2	2711.27	0.35	0.03	1.41									394	0.366			0	0
-33	151.875	20191225	17	2019-12-26 03:00:02	0.2	2629.04	0.34	0.03	1.41									484	0.53			0	0
-33	151.875	20191225	18	2019-12-26 04:00:02	0.19	2588.38	0.34	0.02	1.41									366	0.475			0	0
-33	151.875	20191225	19	2019-12-26 05:00:02	0.18	2576.75	0.33	0.02	1.41									530	0.528			0	0
-33	151.875	20191225	20	2019-12-26 06:00:02	0.17	2581.98	0.33	0.02	1.41									475	0.453			0	0
-33	151.875	20191225	21	2019-12-26 07:00:02	0.16	2598.99	0.33	0.02	1.41									528	0.393			0	0
-33	151.875	20191225	22	2019-12-26 08:00:02	0.17	2627.65	0.32	0.02	1.41									453	0.43			0	0
-33	151.875	20191225	23	2019-12-26 09:00:02	0.18	2673.97	0.32	0.03	1.4									393	0.425			0	0
-33	151.875	20191226	0	2019-12-26 10:00:02	0.12	2262.94	0.27	0.02	1.4									430	0.39			0	0
-33	151.875	20191226	1	2019-12-26 11:00:03	0.09	2332.2	0.27	0.02	1.4									425	0.303			0	0
-33	151.875	20191226	2	2019-12-26 12:00:03	0.08	2524.87	0.29	0.02	1.4									390	0.234			0	0
-33	151.875	20191226	3	2019-12-26 13:00:03	0.59	4808.37	0.56	0.05	1.4									303	0.205			0	0
-33	151.875	20191226	4	2019-12-26 14:00:03	0.68	5233.95	0.6	0.05	1.4									234	0.21			0	0
-33	151.875	20191226	5	2019-12-26 15:00:03	0.59	5393.18	0.61	0.05	1.4									205	0.196			0	0
-33	151.875	20191226	6	2019-12-26 16:00:03	0.45	5377.39	0.61	0.05	1.4									210	0.173			0	0
-33	151.875	20191226	7	2019-12-26 17:00:03	0.33	5335.73	0.6	0.05	1.4									196	0.178			0	0
-33	151.875	20191226	8	2019-12-26 18:00:03	0.24	5394	0.6	0.05	1.4									173	0.164			0	0
-33	151.875	20191226	9	2019-12-26 19:00:03	0.17	5572.84	0.61	0.05	1.4									178	0.309			0	0
-33	151.875	20191226	10	2019-12-26 20:00:03	0.12	5669.66	0.61	0.05	1.4									164	0.21			0	0
-33	151.875	20191226	11	2019-12-26 21:00:03	0.09	5453.54	0.58	0.05	1.4									309	0.24			0	0
-33	151.875	20191226	12	2019-12-26 22:00:03	0.08	4841	0.5	0.05	1.4									210	0.275			0	0
-33	151.875	20191226	13	2019-12-26 23:00:03	0.07	3937.65	0.41	0.04	1.4									240	0.192			0	0
-33	151.875	20191226	14	2019-12-27 00:00:03	0.06	2971.85	0.31	0.03	1.4									275	0.255			0	0
-33	151.875	20191226	15	2019-12-27 01:00:03	0.06	2224.07	0.23	0.02	1.4									192	0.321			0	0
-33	151.875	20191226	16	2019-12-27 02:00:03	0.06	1794.02	0.19	0.02	1.4									255	0.079			0	0
-33	151.875	20191226	17	2019-12-27 03:00:03	0.07	1532.41	0.16	0.01	1.4									321	0.181			0	0
-33	151.875	20191226	18	2019-12-27 04:00:03	0.07	1347.34	0.14	0.01	1.4									79	0.09			0	0
-33	151.875	20191226	19	2019-12-27 05:00:03	0.07	1199.53	0.13	0.01	1.41									181	0.205			0	0
-33	151.875	20191226	20	2019-12-27 06:00:03	0.07	1080.09	0.11	0.01	1.41									90	0.19			0	0
-33	151.875	20191226	21	2019-12-27 07:00:03	0.08	962.97	0.1	0.01	1.41									205	0.22			0	0
-33	151.875	20191226	22	2019-12-27 08:00:03	0.08	847.85	0.09	0.01	1.4									190	0.247			0	0
-33	151.875	20191226	23	2019-12-27 09:00:03	0.08	764.75	0.08	0.01	1.4									220	0.21			0	0
-33	151.875	20191227	0	2019-12-27 10:00:03	0.3	1656.57	0.16	0.02	1.4									247	0.204			0	0
-33	151.875	20191227	1	2019-12-27 11:00:03	0.18	1419.58	0.14	0.01	1.4									210	0.114			0	0
-33	151.875	20191227	2	2019-12-27 12:00:03	0.13	1395.3	0.13	0.01	1.4									204	0.098			0	0
-33	151.875	20191227	3	2019-12-27 13:00:03	0.22	2040.05	0.2	0.02	1.4									114	0.134			0.06	0.07752
-33	151.875	20191227	4	2019-12-27 14:00:03	0.16	2134.63	0.21	0.02	1.4									98	0.131			0.17	0.21964
-33	151.875	20191227	5	2019-12-27 15:00:03	0.13	2304.48	0.23	0.02	1.4									134	0.114			0.27	0.34884
-33	151.875	20191227	6	2019-12-27 16:00:03	0.1	2462.57	0.24	0.02	1.4									131	0.09			0.39	0.50388
-33	151.875	20191227	7	2019-12-27 17:00:03	0.08	2534.42	0.25	0.02	1.4									114	0.13			0.39	0.50388
-33	151.875	20191227	8	2019-12-27 18:00:03	0.06	2488.33	0.25	0.02	1.4									90	0.115			0.4	0.5168
-33	151.875	20191227	9	2019-12-27 19:00:03	0.05	2339.38	0.23	0.02	1.4									130	0.129			0.38	0.49096
-33	151.875	20191227	10	2019-12-27 20:00:03	0.05	2132.82	0.21	0.02	1.4									115	0.22			0.26	0.33592
-33	151.875	20191227	11	2019-12-27 21:00:03	0.06	1907.12	0.19	0.02	1.4									129	0.686			0.11	0.14212
-33	151.875	20191227	12	2019-12-27 22:00:03	0.08	1681.88	0.17	0.02	1.4									220	0.619			0.02	0.02584
-33	151.875	20191227	13	2019-12-27 23:00:03	0.09	1472.75	0.15	0.01	1.4									686	0.106			0.01	0.01292
-33	151.875	20191227	14	2019-12-28 00:00:03	0.1	1294.94	0.13	0.01	1.4									619	0.076			0.01	0.01292
-33	151.875	20191227	15	2019-12-28 01:00:03	0.12	1155.07	0.12	0.01	1.4									106	0.134			0.01	0.01292
-33	151.875	20191227	16	2019-12-28 02:00:03	0.13	1044.83	0.1	0.01	1.4									76	0.089			0.03	0.03876
-33	151.875	20191227	17	2019-12-28 03:00:03	0.13	953.72	0.1	0.01	1.4									134	0.075			0.05	0.0646
-33	151.875	20191227	18	2019-12-28 04:00:03	0.14	879.59	0.09	0.01	1.4									89	0.09			0.09	0.11628
-33	151.875	20191227	19	2019-12-28 05:00:03	0.14	818.13	0.08	0.01	1.4									75	0.139			0.18	0.23256
-33	151.875	20191227	20	2019-12-28 06:00:03	0.14	765.68	0.08	0.01	1.4									90	0.197			0.28	0.36176
-33	151.875	20191227	21	2019-12-28 07:00:03	0.14	723.1	0.07	0.01	1.4									139	0.195			0.36	0.46512
-33	151.875	20191227	22	2019-12-28 08:00:03	0.13	690.23	0.07	0.01	1.4									197	0.345			0.46	0.59432
-33	151.875	20191227	23	2019-12-28 09:00:03	0.13	665.93	0.07	0.01	1.4									195	0.575			0.54	0.69768
-33	151.875	20191228	0	2019-12-28 10:00:03	0.18	881.63	0.08	0.01	1.4									345	0.688			0.45	0.5814
-33	151.875	20191228	1	2019-12-28 11:00:03	0.19	841.84	0.08	0.01	1.4									575	0.336			0.37	0.47804
-33	151.875	20191228	2	2019-12-28 12:00:03	0.19	832.48	0.08	0.01	1.4									688	0.282			0.29	0.37468
-33	151.875	20191228	3	2019-12-28 13:00:03	0.29	1665.96	0.15	0.02	1.4									336	0.222			0.22	0.28424
-33	151.875	20191228	4	2019-12-28 14:00:03	0.23	1386.62	0.14	0.01	1.4									282	0.2			0.22	0.28424
-33	151.875	20191228	5	2019-12-28 15:00:03	0.22	1165.6	0.12	0.01	1.4									222	0.19			0.32	0.41344
-33	151.875	20191228	6	2019-12-28 16:00:03	0.25	1020.04	0.11	0.01	1.4									200	0.221			0.4	0.5168
-33	151.875	20191228	7	2019-12-28 17:00:03	0.31	939.53	0.11	0.01	1.4									190	0.223			0.35	0.4522
-33	151.875	20191228	8	2019-12-28 18:00:03	0.35	884.54	0.1	0.01	1.4									221	0.27			0.31	0.40052
-33	151.875	20191228	9	2019-12-28 19:00:03	0.3	827.09	0.1	0.01	1.4									223	0.236			0.24	0.31008
-33	151.875	20191228	10	2019-12-28 20:00:03	0.21	834.6	0.1	0.01	1.4									270	0.439			0.13	0.16796
-33	151.875	20191228	11	2019-12-28 21:00:03	0.15	944.95	0.11	0.01	1.4									236	0.361			0.05	0.0646
-33	151.875	20191228	12	2019-12-28 22:00:03	0.13	1163.21	0.12	0.01	1.4									439	0.192			0.03	0.03876
-33	151.875	20191228	13	2019-12-28 23:00:03	0.14	1435.1	0.15	0.01	1.4									361	0.183			0.1	0.1292
-33	151.875	20191228	14	2019-12-29 00:00:03	0.17	1694.71	0.18	0.02	1.4									192	0.239			0.18	0.23256
-33	151.875	20191228	15	2019-12-29 01:00:03	0.19	1903.73	0.2	0.02	1.4									183	0.215			0.21	0.27132
-33	151.875	20191228	16	2019-12-29 02:00:03	0.21	2069.58	0.21	0.02	1.4									239	0.357			0.18	0.23256
-33	151.875	20191228	17	2019-12-29 03:00:03	0.25	2270.22	0.23	0.02	1.4									215	0.39			0.17	0.21964
-33	151.875	20191228	18	2019-12-29 04:00:03	0.36	2569.05	0.25	0.02	1.4									357	0.324			0.25	0.323
-33	151.875	20191228	19	2019-12-29 05:00:03	0.64	2972.51	0.29	0.03	1.4									390	0.36			0.66	0.85272
-33	151.875	20191228	20	2019-12-29 06:00:03	1.15	3331.6	0.31	0.03	1.4									324	0.372			1.05	1.3566
-33	151.875	20191228	21	2019-12-29 07:00:03	1.67	3434.98	0.31	0.03	1.4									360	0.498			1.28	1.65376
-33	151.875	20191228	22	2019-12-29 08:00:03	1.67	3384.92	0.3	0.03	1.4									372	1.03			1.41	1.82172
-33	151.875	20191228	23	2019-12-29 09:00:03	1.58	3301.43	0.29	0.03	1.4									498	1.385			1.12	1.44704
-33	151.875	20191229	0	2019-12-29 10:00:03	0.72	7816.75	0.65	0.07	1.4									1030	1.139			0.85	1.0982
-33	151.875	20191229	1	2019-12-29 11:00:03	0.8	7499.25	0.63	0.07	1.4									1385	0.924			0.71	0.91732
-33	151.875	20191229	2	2019-12-29 12:00:03	0.8	7252.26	0.61	0.07	1.4									1139	0.632			0.6	0.7752
-33	151.875	20191229	3	2019-12-29 13:00:03	0.89	8201.69	0.68	0.08	1.4									924	0.613			0.48	0.62016
-33	151.875	20191229	4	2019-12-29 14:00:03	0.78	8104.73	0.68	0.08	1.4									632	0.571			0.34	0.43928
-33	151.875	20191229	5	2019-12-29 15:00:03	0.63	8074.48	0.7	0.08	1.4									613	0.645			0.21	0.27132
-33	151.875	20191229	6	2019-12-29 16:00:03	0.52	8704.39	0.77	0.08	1.41									571	0.574			0.14	0.18088
-33	151.875	20191229	7	2019-12-29 17:00:03	0.43	9222.72	0.83	0.09	1.41									645	0.475			0.06	0.07752
-33	151.875	20191229	8	2019-12-29 18:00:03	0.39	9871.38	0.89	0.09	1.41									574	0.507			0.02	0.02584
-33	151.875	20191229	9	2019-12-29 19:00:03	0.34	10265.6	0.94	0.1	1.41									475	0.399			0.01	0.01292
-33	151.875	20191229	10	2019-12-29 20:00:03	0.31	10275.9	0.96	0.1	1.41									507	0.365			0.01	0.01292
-33	151.875	20191229	11	2019-12-29 21:00:03	0.32	9873.13	0.95	0.09	1.41									399	0.348			0.01	0.01292
-33	151.875	20191229	12	2019-12-29 22:00:03	0.32	9150.48	0.9	0.09	1.41									365	0.244			0.03	0.03876
-33	151.875	20191229	13	2019-12-29 23:00:03	0.3	8364.63	0.85	0.08	1.41									348	0.353			0.12	0.15504
-33	151.875	20191229	14	2019-12-30 00:00:03	0.25	7686.92	0.8	0.07	1.41									244	0.175			0.16	0.20672
-33	151.875	20191229	15	2019-12-30 01:00:03	0.23	7205.85	0.78	0.07	1.41									353	0.161			0.12	0.15504
-33	151.875	20191229	16	2019-12-30 02:00:03	0.25	6905.05	0.77	0.07	1.42									175	0.109			0.07	0.09044
-33	151.875	20191229	17	2019-12-30 03:00:03	0.28	6801.37	0.78	0.07	1.42									161	0.1			0.08	0.10336
-33	151.875	20191229	18	2019-12-30 04:00:03	0.32	6855.68	0.8	0.07	1.42									109	0.149			0.16	0.20672
-33	151.875	20191229	19	2019-12-30 05:00:03	0.43	6860.92	0.79	0.07	1.42									100	0.49			0.29	0.37468
-33	151.875	20191229	20	2019-12-30 06:00:03	0.71	6651.75	0.75	0.06	1.42									149	0.502			0.46	0.59432
-33	151.875	20191229	21	2019-12-30 07:00:03	1.36	6166.66	0.68	0.06	1.41									490	0.524			0.67	0.86564
-33	151.875	20191229	22	2019-12-30 08:00:03	1.58	5611.22	0.61	0.05	1.41									502	0.865			1.16	1.49872
-33	151.875	20191229	23	2019-12-30 09:00:03	1.43	5104.26	0.55	0.05	1.41									524	1.294			1.14	1.47288
-33	151.875	20191230	0	2019-12-30 10:00:03	1.71	10283.3	0.99	0.1	1.41									865	1.584			0.99	1.27908
-33	151.875	20191230	1	2019-12-30 11:00:03	1.46	8894.16	0.85	0.08	1.41									1294	1.236			0.82	1.05944
-33	151.875	20191230	2	2019-12-30 12:00:03	1.3	7758.88	0.74	0.07	1.41									1584	0.615			0.69	0.89148
-33	151.875	20191230	3	2019-12-30 13:00:03	1.43	9949.23	0.93	0.09	1.41									1236	0			0.5	0.646
-33	151.875	20191230	4	2019-12-30 14:00:03	1.17	8983.48	0.85	0.08	1.41									615	0.5			0.23	0.29716
-33	151.875	20191230	5	2019-12-30 15:00:03	0.88	8174.91	0.78	0.08	1.4										0.427			0.09	0.11628
-33	151.875	20191230	6	2019-12-30 16:00:03	0.62	7721.02	0.75	0.07	1.41									500	0.416			0.1	0.1292
-33	151.875	20191230	7	2019-12-30 17:00:03	0.38	7829.75	0.76	0.07	1.41									427	0.339			0.12	0.15504
-33	151.875	20191230	8	2019-12-30 18:00:03	0.24	8533.33	0.81	0.08	1.41									416	0.405			0.14	0.18088
-33	151.875	20191230	9	2019-12-30 19:00:03	0.17	9448.51	0.88	0.09	1.4									339	0.587			0.2	0.2584
-33	151.875	20191230	10	2019-12-30 20:00:03	0.21	10517.4	0.96	0.1	1.4									405	0.384			0.25	0.323
-33	151.875	20191230	11	2019-12-30 21:00:03	0.38	11723.9	1.05	0.11	1.4									587	0.767			0.22	0.28424
-33	151.875	20191230	12	2019-12-30 22:00:03	0.47	12897.2	1.15	0.12	1.4									384	1.003			0.32	0.41344
-33	151.875	20191230	13	2019-12-30 23:00:03	0.54	14130.1	1.25	0.13	1.4									767	0.879			0.46	0.59432
-33	151.875	20191230	14	2019-12-31 00:00:03	0.69	15605.5	1.39	0.15	1.4									1003	0.737			0.62	0.80104
-33	151.875	20191230	15	2019-12-31 01:00:03	0.82	17118.2	1.53	0.16	1.4									879	0.786			0.9	1.1628
-33	151.875	20191230	16	2019-12-31 02:00:03	0.93	17892.3	1.63	0.17	1.4									737	1.133			0.99	1.27908
-33	151.875	20191230	17	2019-12-31 03:00:03	1.05	17369.9	1.61	0.16	1.4									786	1.673			0.66	0.85272
-33	151.875	20191230	18	2019-12-31 04:00:03	1.22	15507	1.47	0.14	1.4									1133	1.42			0.46	0.59432
-33	151.875	20191230	19	2019-12-31 05:00:03	1.46	12802.3	1.25	0.12	1.4									1673	1.917			0.31	0.40052
-33	151.875	20191230	20	2019-12-31 06:00:03	1.62	10161.5	1.01	0.09	1.4									1420	3.185			0.29	0.37468
-33	151.875	20191230	21	2019-12-31 07:00:03	1.45	8301.9	0.84	0.08	1.4									1917	3.556			0.34	0.43928
-33	151.875	20191230	22	2019-12-31 08:00:03	1.05	7137.34	0.72	0.07	1.4									3185	3.166			0.26	0.33592
-33	151.875	20191230	23	2019-12-31 09:00:03	0.79	6332.9	0.64	0.06	1.4									3556	1.734			0.17	0.21964
-33	151.875	20191231	0	2019-12-31 10:00:03	1.24	10012.1	0.95	0.09	1.4									3166	0.745			0.11	0.14212
-33	151.875	20191231	1	2019-12-31 11:00:03	1.98	10556.6	0.98	0.1	1.4									1734	0.638			0.14	0.18088
-33	151.875	20191231	2	2019-12-31 12:00:03	3.26	13600.2	1.21	0.13	1.4									745	0.571			0.21	0.27132
-33	151.875	20191231	3	2019-12-31 13:00:03	3.82	16074	1.42	0.15	1.4									638	1.11			0.29	0.37468
-33	151.875	20191231	4	2019-12-31 14:00:03	3.78	19159.1	1.69	0.18	1.4									571	0.889			0.36	0.46512
-33	151.875	20191231	5	2019-12-31 15:00:03	3.75	23406.7	2.07	0.22	1.4									1110	0.911			0.39	0.50388
-33	151.875	20191231	6	2019-12-31 16:00:03	0.83	11203.5	1.06	0.1	1.4									889	1.154			0.27	0.34884
-33	151.875	20191231	7	2019-12-31 17:00:03	0.8	10809.3	1.04	0.1	1.4									911	1.616			0.25	0.323
-33	151.875	20191231	8	2019-12-31 18:00:03	0.62	10451.9	1.02	0.1	1.4									1154	1.386			0.29	0.37468
-33	151.875	20191231	9	2019-12-31 19:00:03	0.46	10213.6	1	0.09	1.4									1616	0.852			0.39	0.50388
-33	151.875	20191231	10	2019-12-31 20:00:03	0.44	10201.6	1	0.1	1.4									1386	0.706			0.38	0.49096
-33	151.875	20191231	11	2019-12-31 21:00:03	0.45	10182.5	1.02	0.1	1.4									852	0.697			0.29	0.37468
-33	151.875	20191231	12	2019-12-31 22:00:03	0.46	9925.01	1.05	0.09	1.41									706	0.277			0.44	0.56848
-33	151.875	20191231	13	2019-12-31 23:00:03	0.45	9339.66	1.04	0.09	1.41									697	0.155			1.13	1.45996
-33	151.875	20191231	14	2020-01-01 00:00:03	0.37	8322.29	0.96	0.08	1.41									277	0.151			1.82	2.35144
-33	151.875	20191231	15	2020-01-01 01:00:03	0.25	7042.51	0.82	0.07	1.41									155	0.13			1.54	1.98968
-33	151.875	20191231	16	2020-01-01 02:00:03	0.21	5729.86	0.67	0.05	1.41									151	0.297			0.86	1.11112
-33	151.875	20191231	17	2020-01-01 03:00:03	0.21	4657.4	0.55	0.04	1.41									130	1.725			0.11	0.14212
-33	151.875	20191231	18	2020-01-01 04:00:03	0.22	3975.86	0.5	0.04	1.41									297	2.463			0.13	0.16796
-33	151.875	20191231	19	2020-01-01 05:00:03	0.25	3627.65	0.5	0.04	1.42									1725	2.118			0.19	0.24548
-33	151.875	20191231	20	2020-01-01 06:00:03	0.28	3418.2	0.52	0.03	1.43									2463	2.098			0.18	0.23256
-33	151.875	20191231	21	2020-01-01 07:00:03	0.32	3197.51	0.52	0.03	1.44									2118	1.568			0.16	0.20672
-33	151.875	20191231	22	2020-01-01 08:00:03	0.37	2937.29	0.51	0.03	1.44									2098	0.692			0.19	0.24548
-33	151.875	20191231	23	2020-01-01 09:00:03	0.44	2745.44	0.47	0.03	1.44									1568	0.387			0.17	0.21964
																		692	0.335			0.16	0.20672
																		387	0.523				0
																		335					0
																		523					0
