# Supplementary material for: Black Carbon Emission, Transport and Effect on Radiation Forcing Modelling During the Summer 2019–2020 Wildfires in Southeast Australia
Source: Preprints.org preprint supplement (doi:10.20944/preprints202302.0293.v1), 2023-02-17
Supplement: Supplementary file 14 [file merra_bc_201912_500.xlsx]

## Sheet: merra_bc_201912_500
lat	lon	date	time	date_time	bc	bccmass	totexttau	bcexttau	bcangstr			Date	MERRA-2 Predicted BC	Observed PM₂ι₅						Observed BC	WRF-Chem predicted BC
-34.5	150.625	20191201	0	2019-12-01 10:00:00	1.14	2956.07	0.26	0.03	1.4			2019-12-01	2.54143	0						0.197833	0.0447893
-34.5	150.625	20191201	1	2019-12-01 11:00:00	3.39	9383.62	0.8	0.09	1.4			2019-12-02	0.392917	4.0875				WOLLONGONG BC7 1h average [ng/m³]	BC(ng/m3)	0.115174	0.199183
-34.5	150.625	20191201	2	2019-12-01 12:00:00	6.6	19213	1.62	0.18	1.4			2019-12-03	0.664583	4.06667				197.833	26.8318	0.204083	0.89471
-34.5	150.625	20191201	3	2019-12-01 13:00:00	2.25	6704.09	0.59	0.06	1.4			2019-12-04	1.27458	9.04583				115.174	119.324	0.603458	0.134583
-34.5	150.625	20191201	4	2019-12-01 14:00:00	4.34	13148.9	1.16	0.12	1.4			2019-12-05	2.17542	30.7625				204.083	535.991	0.959083	0.588398
-34.5	150.625	20191201	5	2019-12-01 15:00:00	5.83	17597.3	1.6	0.16	1.41			2019-12-06	3.30958	19.3208				603.458	80.6244	1.72087	0.366605
-34.5	150.625	20191201	6	2019-12-01 16:00:00	5.3	15055.3	1.48	0.14	1.42			2019-12-07	3.27917	86.3708				959.083	352.49	0.896583	0.553407
-34.5	150.625	20191201	7	2019-12-01 17:00:00	2.89	7511.26	0.83	0.07	1.44			2019-12-08	1.14875	24.8167				1720.88	219.621	0.203042	3.0109
-34.5	150.625	20191201	8	2019-12-01 18:00:00	0.98	2544.95	0.31	0.03	1.44			2019-12-09	4.30417	64.8				896.583	331.527	0.551652	1.54771
-34.5	150.625	20191201	9	2019-12-01 19:00:00	0.51	1105.7	0.13	0.01	1.44			2019-12-10	7.95583	98.9625				203.042	1803.73	3.09217	0.52649
-34.5	150.625	20191201	10	2019-12-01 20:00:00	0.56	878.71	0.1	0.01	1.43			2019-12-11	0.9175	24.5458				551.652	927.18	0.328875	0.0301467
-34.5	150.625	20191201	11	2019-12-01 21:00:00	0.63	865.3	0.1	0.01	1.42			2019-12-12	0.787917	18.0375				3092.17	315.402	0.268458	0.00915167
-34.5	150.625	20191201	12	2019-12-01 22:00:00	0.61	796.02	0.1	0.01	1.45			2019-12-13	0.5675	9.0375				328.875	18.0599	0.248042	0.00753667
-34.5	150.625	20191201	13	2019-12-01 23:00:00	0.55	745.68	0.1	0.01	1.46			2019-12-14	1.53083	39.3667				268.458	5.48246	0.573958	0.03876
-34.5	150.625	20191201	14	2019-12-02 00:00:00	0.5	681.51	0.09	0.01	1.45			2019-12-15	2.47958	30.5083				248.042	4.51496	0.876348	0.822573
-34.5	150.625	20191201	15	2019-12-02 01:00:00	0.45	590.79	0.08	0.01	1.46			2019-12-16	1.48208	23.0625				573.958	23.2198	0.502652	0.0296083
-34.5	150.625	20191201	16	2019-12-02 02:00:00	0.4	495.07	0.08	0.01	1.49			2019-12-17	1.65875	8.05417				876.348	492.776	0.310458	0.0220717
-34.5	150.625	20191201	17	2019-12-02 03:00:00	0.36	460.43	0.07	0	1.47			2019-12-18	6.67208	30.8375				502.652	17.7374	0.540042	0.334843
-34.5	150.625	20191201	18	2019-12-02 04:00:00	0.34	498.51	0.08	0.01	1.47			2019-12-19	13.6758	46.8458				310.458	13.2224	4.21737	2.32883
-34.5	150.625	20191201	19	2019-12-02 05:00:00	0.27	504.24	0.06	0	1.42			2019-12-20	4.79708	7.46667				540.042	200.593	0.523833	0.652998
-34.5	150.625	20191201	20	2019-12-02 06:00:00	0.13	434.85	0.05	0	1.41			2019-12-21	8.415	49.6542				4217.38	1395.12	0.853625	1.45888
-34.5	150.625	20191201	21	2019-12-02 07:00:00	0.08	384.73	0.05	0	1.41			2019-12-22	3.12708	15.3625				523.833	391.189	0.339708	0.741285
-34.5	150.625	20191201	22	2019-12-02 08:00:00	0.11	426.43	0.05	0	1.41			2019-12-23	1.54	14.0708				853.625	873.968	0.61787	0.0349917
-34.5	150.625	20191201	23	2019-12-02 09:00:00	0.28	708.56	0.09	0.01	1.41			2019-12-24	0.9275	10.1667				339.708	444.079	2.02158	0.01292
-34.5	150.625	20191202	0	2019-12-02 10:00:00	0.5	1127.21	0.15	0.01	1.41			2019-12-25	1.0125	13.1083				617.87	20.9623	0.723208	0
-34.5	150.625	20191202	1	2019-12-02 11:00:00	0.73	1648.55	0.23	0.02	1.42			2019-12-26	1.14667	10.7125				2021.58	7.73994	0.49625	0.00269167
-34.5	150.625	20191202	2	2019-12-02 12:00:00	0.91	2083.05	0.26	0.02	1.41			2019-12-27	1.75417	8.79583				723.208	0	0.430292	0.0269167
-34.5	150.625	20191202	3	2019-12-02 13:00:00	1.09	2504.75	0.27	0.02	1.41			2019-12-28	3.87125	16.65				496.25	1.61249	0.494625	0.461352
-34.5	150.625	20191202	4	2019-12-02 14:00:00	1.16	2769.15	0.29	0.03	1.41			2019-12-29	11.9254	44.2708				430.292	16.1249	0.669792	2.40958
-34.5	150.625	20191202	5	2019-12-02 15:00:00	0.8	2039.26	0.21	0.02	1.41			2019-12-30	5.75042	61.2667				494.625	276.38	1.02848	1.278
-34.5	150.625	20191202	6	2019-12-02 16:00:00	0.36	1111.63	0.12	0.01	1.41			2019-12-31	4.96333	52.4375				669.792	1443.5	1.60587	1.23009
-34.5	150.625	20191202	7	2019-12-02 17:00:00	0.21	741.97	0.08	0.01	1.41			2020-01-01	1.717	17.1545				1028.48	765.609
-34.5	150.625	20191202	8	2019-12-02 18:00:00	0.16	601.64	0.06	0.01	1.4									1605.88	736.907
-34.5	150.625	20191202	9	2019-12-02 19:00:00	0.13	541.99	0.06	0.01	1.4
-34.5	150.625	20191202	10	2019-12-02 20:00:00	0.12	500.54	0.06	0	1.4
-34.5	150.625	20191202	11	2019-12-02 21:00:00	0.11	447.19	0.06	0	1.4
-34.5	150.625	20191202	12	2019-12-02 22:00:00	0.11	416.5	0.06	0	1.41
-34.5	150.625	20191202	13	2019-12-02 23:00:00	0.12	397.98	0.06	0	1.41
-34.5	150.625	20191202	14	2019-12-03 00:00:00	0.12	390.99	0.05	0	1.4
-34.5	150.625	20191202	15	2019-12-03 01:00:00	0.12	396.12	0.05	0	1.4
-34.5	150.625	20191202	16	2019-12-03 02:00:00	0.11	405.83	0.05	0	1.4
-34.5	150.625	20191202	17	2019-12-03 03:00:00	0.11	421.6	0.04	0	1.4
-34.5	150.625	20191202	18	2019-12-03 04:00:00	0.11	437.12	0.04	0	1.4
-34.5	150.625	20191202	19	2019-12-03 05:00:00	0.11	451.82	0.04	0	1.4
-34.5	150.625	20191202	20	2019-12-03 06:00:00	0.09	481.21	0.04	0	1.4
-34.5	150.625	20191202	21	2019-12-03 07:00:00	0.08	515.51	0.04	0	1.4
-34.5	150.625	20191202	22	2019-12-03 08:00:00	0.09	557.7	0.05	0.01	1.4
-34.5	150.625	20191202	23	2019-12-03 09:00:00	0.16	663.59	0.06	0.01	1.4
-34.5	150.625	20191203	0	2019-12-03 10:00:00	0.61	1289.97	0.11	0.01	1.4
-34.5	150.625	20191203	1	2019-12-03 11:00:00	1.68	2997.61	0.26	0.03	1.4
-34.5	150.625	20191203	2	2019-12-03 12:00:00	2.76	4998.33	0.43	0.05	1.4
-34.5	150.625	20191203	3	2019-12-03 13:00:00	0.86	1949.85	0.19	0.02	1.4
-34.5	150.625	20191203	4	2019-12-03 14:00:00	2.08	4392.45	0.38	0.04	1.4
-34.5	150.625	20191203	5	2019-12-03 15:00:00	2.23	4775.55	0.4	0.04	1.4
-34.5	150.625	20191203	6	2019-12-03 16:00:00	1.64	3446.2	0.3	0.03	1.4
-34.5	150.625	20191203	7	2019-12-03 17:00:00	0.89	1877.81	0.19	0.02	1.4
-34.5	150.625	20191203	8	2019-12-03 18:00:00	0.54	1217.02	0.13	0.01	1.4
-34.5	150.625	20191203	9	2019-12-03 19:00:00	0.41	989	0.11	0.01	1.4
-34.5	150.625	20191203	10	2019-12-03 20:00:00	0.35	892.46	0.09	0.01	1.4
-34.5	150.625	20191203	11	2019-12-03 21:00:00	0.31	791.09	0.08	0.01	1.4
-34.5	150.625	20191203	12	2019-12-03 22:00:00	0.26	701.17	0.07	0.01	1.4
-34.5	150.625	20191203	13	2019-12-03 23:00:00	0.23	649.18	0.07	0.01	1.4
-34.5	150.625	20191203	14	2019-12-04 00:00:00	0.19	609.89	0.06	0.01	1.4
-34.5	150.625	20191203	15	2019-12-04 01:00:00	0.17	583.49	0.06	0.01	1.4
-34.5	150.625	20191203	16	2019-12-04 02:00:00	0.16	569.34	0.06	0.01	1.4
-34.5	150.625	20191203	17	2019-12-04 03:00:00	0.18	574.4	0.06	0.01	1.4
-34.5	150.625	20191203	18	2019-12-04 04:00:00	0.19	584.13	0.06	0.01	1.4
-34.5	150.625	20191203	19	2019-12-04 05:00:00	0.22	595.39	0.06	0.01	1.4
-34.5	150.625	20191203	20	2019-12-04 06:00:00	0.21	602.9	0.06	0.01	1.4
-34.5	150.625	20191203	21	2019-12-04 07:00:00	0.15	606.1	0.06	0.01	1.4
-34.5	150.625	20191203	22	2019-12-04 08:00:00	0.16	641.78	0.06	0.01	1.4
-34.5	150.625	20191203	23	2019-12-04 09:00:00	0.27	837.6	0.08	0.01	1.4
-34.5	150.625	20191204	0	2019-12-04 10:00:00	0.69	1629.86	0.14	0.02	1.4
-34.5	150.625	20191204	1	2019-12-04 11:00:00	1.83	4107.08	0.36	0.04	1.4
-34.5	150.625	20191204	2	2019-12-04 12:00:00	2.92	6754.92	0.57	0.06	1.4
-34.5	150.625	20191204	3	2019-12-04 13:00:00	1.15	3035.13	0.27	0.03	1.4
-34.5	150.625	20191204	4	2019-12-04 14:00:00	2.46	6318.5	0.54	0.06	1.4
-34.5	150.625	20191204	5	2019-12-04 15:00:00	2.64	7030.59	0.59	0.07	1.4
-34.5	150.625	20191204	6	2019-12-04 16:00:00	2.55	7866.31	0.66	0.07	1.4
-34.5	150.625	20191204	7	2019-12-04 17:00:00	2.19	6317.57	0.54	0.06	1.4
-34.5	150.625	20191204	8	2019-12-04 18:00:00	1.76	4020.67	0.34	0.04	1.4
-34.5	150.625	20191204	9	2019-12-04 19:00:00	1.61	2423.67	0.2	0.02	1.4
-34.5	150.625	20191204	10	2019-12-04 20:00:00	1.79	1723.65	0.14	0.02	1.4
-34.5	150.625	20191204	11	2019-12-04 21:00:00	2.03	1464.94	0.12	0.01	1.4
-34.5	150.625	20191204	12	2019-12-04 22:00:00	2.33	1442.56	0.12	0.01	1.4
-34.5	150.625	20191204	13	2019-12-04 23:00:00	2.74	1471.18	0.12	0.01	1.4
-34.5	150.625	20191204	14	2019-12-05 00:00:00	3.35	1426.93	0.12	0.01	1.4
-34.5	150.625	20191204	15	2019-12-05 01:00:00	3.65	1331.83	0.12	0.01	1.4
-34.5	150.625	20191204	16	2019-12-05 02:00:00	3.18	1180.33	0.11	0.01	1.4
-34.5	150.625	20191204	17	2019-12-05 03:00:00	2.35	1018.38	0.1	0.01	1.4
-34.5	150.625	20191204	18	2019-12-05 04:00:00	1.94	942.67	0.09	0.01	1.4
-34.5	150.625	20191204	19	2019-12-05 05:00:00	1.96	920.5	0.09	0.01	1.4
-34.5	150.625	20191204	20	2019-12-05 06:00:00	1.84	902.97	0.09	0.01	1.4
-34.5	150.625	20191204	21	2019-12-05 07:00:00	0.83	812.69	0.08	0.01	1.4
-34.5	150.625	20191204	22	2019-12-05 08:00:00	0.4	741.15	0.08	0.01	1.4
-34.5	150.625	20191204	23	2019-12-05 09:00:00	0.46	967.19	0.1	0.01	1.4
-34.5	150.625	20191205	0	2019-12-05 10:00:00	1.37	2760.23	0.26	0.03	1.4
-34.5	150.625	20191205	1	2019-12-05 11:00:00	3.66	7836.41	0.68	0.07	1.4
-34.5	150.625	20191205	2	2019-12-05 12:00:00	5.25	12057.4	1	0.11	1.4
-34.5	150.625	20191205	3	2019-12-05 13:00:00	3.32	8639.21	0.71	0.08	1.4
-34.5	150.625	20191205	4	2019-12-05 14:00:00	4.87	12361	1	0.11	1.4
-34.5	150.625	20191205	5	2019-12-05 15:00:00	4.33	10466.8	0.85	0.1	1.4
-34.5	150.625	20191205	6	2019-12-05 16:00:00	2.82	5990.91	0.51	0.06	1.41
-34.5	150.625	20191205	7	2019-12-05 17:00:00	1.5	2967.29	0.26	0.03	1.42
-34.5	150.625	20191205	8	2019-12-05 18:00:00	0.89	1986.78	0.18	0.02	1.41
-34.5	150.625	20191205	9	2019-12-05 19:00:00	0.75	1640.98	0.16	0.02	1.43
-34.5	150.625	20191205	10	2019-12-05 20:00:00	0.79	1440.18	0.15	0.01	1.44
-34.5	150.625	20191205	11	2019-12-05 21:00:00	0.81	1281.31	0.13	0.01	1.43
-34.5	150.625	20191205	12	2019-12-05 22:00:00	0.85	1264.55	0.13	0.01	1.43
-34.5	150.625	20191205	13	2019-12-05 23:00:00	1.04	1273.02	0.14	0.01	1.43
-34.5	150.625	20191205	14	2019-12-06 00:00:00	1.1	1199.53	0.13	0.01	1.44
-34.5	150.625	20191205	15	2019-12-06 01:00:00	1.11	1083.31	0.12	0.01	1.44
-34.5	150.625	20191205	16	2019-12-06 02:00:00	1.26	1004.11	0.11	0.01	1.44
-34.5	150.625	20191205	17	2019-12-06 03:00:00	1.7	988.11	0.11	0.01	1.43
-34.5	150.625	20191205	18	2019-12-06 04:00:00	2.71	1069.61	0.11	0.01	1.42
-34.5	150.625	20191205	19	2019-12-06 05:00:00	4.33	1251.38	0.13	0.01	1.42
-34.5	150.625	20191205	20	2019-12-06 06:00:00	4.05	1439.29	0.17	0.01	1.45
-34.5	150.625	20191205	21	2019-12-06 07:00:00	1.98	1497.62	0.19	0.02	1.47
-34.5	150.625	20191205	22	2019-12-06 08:00:00	1.12	1419.15	0.2	0.02	1.49
-34.5	150.625	20191205	23	2019-12-06 09:00:00	0.99	1678.84	0.24	0.02	1.5
-34.5	150.625	20191206	0	2019-12-06 10:00:00	1.91	3141.88	0.36	0.03	1.47
-34.5	150.625	20191206	1	2019-12-06 11:00:00	5.49	8646.3	0.78	0.08	1.42
-34.5	150.625	20191206	2	2019-12-06 12:00:00	8.74	13805.5	1.16	0.13	1.41
-34.5	150.625	20191206	3	2019-12-06 13:00:00	11.17	17450.1	1.4	0.16	1.4
-34.5	150.625	20191206	4	2019-12-06 14:00:00	12.86	19316.2	1.52	0.18	1.4
-34.5	150.625	20191206	5	2019-12-06 15:00:00	9.45	15601.4	1.22	0.14	1.4
-34.5	150.625	20191206	6	2019-12-06 16:00:00	1.07	2821.88	0.25	0.03	1.4
-34.5	150.625	20191206	7	2019-12-06 17:00:00	1.23	3160.6	0.28	0.03	1.4
-34.5	150.625	20191206	8	2019-12-06 18:00:00	1.06	2504.27	0.23	0.02	1.41
-34.5	150.625	20191206	9	2019-12-06 19:00:00	0.98	1906.76	0.2	0.02	1.41
-34.5	150.625	20191206	10	2019-12-06 20:00:00	1.02	1593.75	0.18	0.01	1.4
-34.5	150.625	20191206	11	2019-12-06 21:00:00	1.1	1416.96	0.17	0.01	1.4
-34.5	150.625	20191206	12	2019-12-06 22:00:00	1.36	1359.55	0.17	0.01	1.41
-34.5	150.625	20191206	13	2019-12-06 23:00:00	1.64	1363.06	0.18	0.01	1.41
-34.5	150.625	20191206	14	2019-12-07 00:00:00	1.59	1347.77	0.17	0.01	1.41
-34.5	150.625	20191206	15	2019-12-07 01:00:00	1.75	1342.78	0.17	0.01	1.41
-34.5	150.625	20191206	16	2019-12-07 02:00:00	2.41	1411.51	0.17	0.01	1.41
-34.5	150.625	20191206	17	2019-12-07 03:00:00	3.98	1580.87	0.18	0.01	1.41
-34.5	150.625	20191206	18	2019-12-07 04:00:00	6.68	1907.2	0.21	0.02	1.41
-34.5	150.625	20191206	19	2019-12-07 05:00:00	9.83	2329.57	0.24	0.02	1.41
-34.5	150.625	20191206	20	2019-12-07 06:00:00	11.59	2633.49	0.27	0.02	1.41
-34.5	150.625	20191206	21	2019-12-07 07:00:00	5.15	2661.17	0.26	0.02	1.41
-34.5	150.625	20191206	22	2019-12-07 08:00:00	1.7	2183.98	0.22	0.02	1.41
-34.5	150.625	20191206	23	2019-12-07 09:00:00	1.04	1962.73	0.2	0.02	1.42
-34.5	150.625	20191207	0	2019-12-07 10:00:00	1.56	3688.49	0.34	0.03	1.41
-34.5	150.625	20191207	1	2019-12-07 11:00:00	2.78	6996.28	0.63	0.07	1.41
-34.5	150.625	20191207	2	2019-12-07 12:00:00	3.79	10355	0.92	0.1	1.41
-34.5	150.625	20191207	3	2019-12-07 13:00:00	4.08	12872.5	1.15	0.12	1.41
-34.5	150.625	20191207	4	2019-12-07 14:00:00	4.57	15239.3	1.36	0.14	1.4
-34.5	150.625	20191207	5	2019-12-07 15:00:00	4.13	14527.1	1.3	0.14	1.4
-34.5	150.625	20191207	6	2019-12-07 16:00:00	3.21	11269.3	1.02	0.11	1.41
-34.5	150.625	20191207	7	2019-12-07 17:00:00	2.37	7729.74	0.72	0.07	1.4
-34.5	150.625	20191207	8	2019-12-07 18:00:00	1.75	5006.06	0.48	0.05	1.4
-34.5	150.625	20191207	9	2019-12-07 19:00:00	1.35	3312.85	0.35	0.03	1.4
-34.5	150.625	20191207	10	2019-12-07 20:00:00	1.07	2423.3	0.29	0.02	1.41
-34.5	150.625	20191207	11	2019-12-07 21:00:00	0.88	1947.95	0.29	0.02	1.42
-34.5	150.625	20191207	12	2019-12-07 22:00:00	0.77	1640.93	0.35	0.02	1.44
-34.5	150.625	20191207	13	2019-12-07 23:00:00	0.67	1429.61	0.31	0.01	1.44
-34.5	150.625	20191207	14	2019-12-08 00:00:00	0.63	1291.49	0.27	0.01	1.44
-34.5	150.625	20191207	15	2019-12-08 01:00:00	0.68	1208.91	0.27	0.01	1.44
-34.5	150.625	20191207	16	2019-12-08 02:00:00	0.78	1187.08	0.31	0.01	1.45
-34.5	150.625	20191207	17	2019-12-08 03:00:00	0.94	1179.41	0.32	0.01	1.45
-34.5	150.625	20191207	18	2019-12-08 04:00:00	1.01	1156.15	0.32	0.01	1.45
-34.5	150.625	20191207	19	2019-12-08 05:00:00	0.93	1116.26	0.3	0.01	1.45
-34.5	150.625	20191207	20	2019-12-08 06:00:00	0.63	1066.29	0.26	0.01	1.44
-34.5	150.625	20191207	21	2019-12-08 07:00:00	0.53	1035.61	0.24	0.01	1.44
-34.5	150.625	20191207	22	2019-12-08 08:00:00	0.54	1101.94	0.22	0.01	1.43
-34.5	150.625	20191207	23	2019-12-08 09:00:00	0.7	1469.12	0.23	0.01	1.42
-34.5	150.625	20191208	0	2019-12-08 10:00:00	2.39	18716.5	1.75	0.18	1.41
-34.5	150.625	20191208	1	2019-12-08 11:00:00	2.44	16862.5	1.63	0.16	1.41
-34.5	150.625	20191208	2	2019-12-08 12:00:00	2.71	14505.6	1.5	0.14	1.41
-34.5	150.625	20191208	3	2019-12-08 13:00:00	2.11	10350.5	1.12	0.1	1.42
-34.5	150.625	20191208	4	2019-12-08 14:00:00	2.14	10060.2	1.08	0.1	1.41
-34.5	150.625	20191208	5	2019-12-08 15:00:00	1.82	10719.9	1.08	0.1	1.41
-34.5	150.625	20191208	6	2019-12-08 16:00:00	1.4	11421.1	1.11	0.11	1.41
-34.5	150.625	20191208	7	2019-12-08 17:00:00	1.08	11541.4	1.13	0.11	1.41
-34.5	150.625	20191208	8	2019-12-08 18:00:00	0.85	11247.4	1.11	0.11	1.41
-34.5	150.625	20191208	9	2019-12-08 19:00:00	0.68	10734.7	1.12	0.1	1.41
-34.5	150.625	20191208	10	2019-12-08 20:00:00	0.61	9954.34	1.08	0.09	1.41
-34.5	150.625	20191208	11	2019-12-08 21:00:00	0.6	8972.21	0.98	0.09	1.41
-34.5	150.625	20191208	12	2019-12-08 22:00:00	0.65	7959.23	0.92	0.08	1.42
-34.5	150.625	20191208	13	2019-12-08 23:00:00	0.72	7052.25	0.84	0.07	1.42
-34.5	150.625	20191208	14	2019-12-09 00:00:00	0.75	6324.75	0.76	0.06	1.42
-34.5	150.625	20191208	15	2019-12-09 01:00:00	0.78	5730.31	0.72	0.06	1.42
-34.5	150.625	20191208	16	2019-12-09 02:00:00	0.83	5289.66	0.7	0.05	1.43
-34.5	150.625	20191208	17	2019-12-09 03:00:00	0.81	5033.69	0.66	0.05	1.43
-34.5	150.625	20191208	18	2019-12-09 04:00:00	0.8	4922.92	0.66	0.05	1.42
-34.5	150.625	20191208	19	2019-12-09 05:00:00	0.81	4831.54	0.64	0.05	1.42
-34.5	150.625	20191208	20	2019-12-09 06:00:00	0.62	4672.66	0.6	0.05	1.42
-34.5	150.625	20191208	21	2019-12-09 07:00:00	0.61	4431.96	0.59	0.04	1.42
-34.5	150.625	20191208	22	2019-12-09 08:00:00	0.86	4186.15	0.53	0.04	1.42
-34.5	150.625	20191208	23	2019-12-09 09:00:00	1.24	4066.24	0.46	0.04	1.42
-34.5	150.625	20191209	0	2019-12-09 10:00:00	2.46	6897	0.67	0.07	1.41
-34.5	150.625	20191209	1	2019-12-09 11:00:00	4.54	11016.4	1.03	0.1	1.4
-34.5	150.625	20191209	2	2019-12-09 12:00:00	7.79	20205.1	1.83	0.19	1.4
-34.5	150.625	20191209	3	2019-12-09 13:00:00	5.55	19451.9	1.61	0.18	1.4
-34.5	150.625	20191209	4	2019-12-09 14:00:00	7.59	27069.6	2.31	0.25	1.4
-34.5	150.625	20191209	5	2019-12-09 15:00:00	8.86	34333	2.99	0.32	1.4
-34.5	150.625	20191209	6	2019-12-09 16:00:00	9.24	37627.8	3.34	0.35	1.4
-34.5	150.625	20191209	7	2019-12-09 17:00:00	7.81	35510.7	3.2	0.33	1.4
-34.5	150.625	20191209	8	2019-12-09 18:00:00	6.62	32233.3	2.98	0.3	1.4
-34.5	150.625	20191209	9	2019-12-09 19:00:01	6.25	29267.4	2.78	0.27	1.41
-34.5	150.625	20191209	10	2019-12-09 20:00:01	6.31	26682.1	2.52	0.25	1.41
-34.5	150.625	20191209	11	2019-12-09 21:00:01	6.61	24247.9	2.26	0.23	1.4
-34.5	150.625	20191209	12	2019-12-09 22:00:01	7.21	21870.4	2.04	0.2	1.41
-34.5	150.625	20191209	13	2019-12-09 23:00:01	8.35	19739.6	1.86	0.19	1.41
-34.5	150.625	20191209	14	2019-12-10 00:00:01	10.9	18167.1	1.77	0.17	1.41
-34.5	150.625	20191209	15	2019-12-10 01:00:01	14.83	16915.5	1.67	0.16	1.41
-34.5	150.625	20191209	16	2019-12-10 02:00:01	18.86	15505.6	1.54	0.15	1.41
-34.5	150.625	20191209	17	2019-12-10 03:00:01	22.21	14005.6	1.37	0.13	1.41
-34.5	150.625	20191209	18	2019-12-10 04:00:01	23.92	12537.9	1.15	0.12	1.41
-34.5	150.625	20191209	19	2019-12-10 05:00:01	24.17	10937.8	0.97	0.1	1.41
-34.5	150.625	20191209	20	2019-12-10 06:00:01	22.36	9095.15	0.78	0.09	1.41
-34.5	150.625	20191209	21	2019-12-10 07:00:01	18.85	7354.1	0.62	0.07	1.41
-34.5	150.625	20191209	22	2019-12-10 08:00:01	14.41	6217.89	0.51	0.06	1.41
-34.5	150.625	20191209	23	2019-12-10 09:00:01	5.97	5858.84	0.48	0.06	1.41
-34.5	150.625	20191210	0	2019-12-10 10:00:01	2.22	8036.71	0.67	0.08	1.41
-34.5	150.625	20191210	1	2019-12-10 11:00:01	2.26	7944.44	0.68	0.07	1.41
-34.5	150.625	20191210	2	2019-12-10 12:00:01	2.02	7821.51	0.75	0.07	1.42
-34.5	150.625	20191210	3	2019-12-10 13:00:01	1.81	7943.57	0.92	0.08	1.42
-34.5	150.625	20191210	4	2019-12-10 14:00:01	1.61	7615.45	0.85	0.07	1.42
-34.5	150.625	20191210	5	2019-12-10 15:00:01	1.3	6475.93	0.67	0.06	1.41
-34.5	150.625	20191210	6	2019-12-10 16:00:01	0.95	4964.02	0.56	0.05	1.42
-34.5	150.625	20191210	7	2019-12-10 17:00:01	0.63	3490.32	0.49	0.03	1.43
-34.5	150.625	20191210	8	2019-12-10 18:00:01	0.41	2338.58	0.41	0.02	1.44
-34.5	150.625	20191210	9	2019-12-10 19:00:01	0.29	1593.68	0.36	0.02	1.47
-34.5	150.625	20191210	10	2019-12-10 20:00:01	0.23	1296.79	0.35	0.01	1.47
-34.5	150.625	20191210	11	2019-12-10 21:00:01	0.23	1262.33	0.34	0.01	1.46
-34.5	150.625	20191210	12	2019-12-10 22:00:01	0.24	1267.52	0.32	0.01	1.45
-34.5	150.625	20191210	13	2019-12-10 23:00:01	0.26	1221.63	0.3	0.01	1.44
-34.5	150.625	20191210	14	2019-12-11 00:00:01	0.29	1141.83	0.31	0.01	1.44
-34.5	150.625	20191210	15	2019-12-11 01:00:01	0.29	1065.69	0.3	0.01	1.45
-34.5	150.625	20191210	16	2019-12-11 02:00:01	0.26	997.66	0.26	0.01	1.44
-34.5	150.625	20191210	17	2019-12-11 03:00:01	0.24	953.77	0.24	0.01	1.44
-34.5	150.625	20191210	18	2019-12-11 04:00:01	0.23	916.61	0.23	0.01	1.43
-34.5	150.625	20191210	19	2019-12-11 05:00:01	0.23	884.97	0.22	0.01	1.44
-34.5	150.625	20191210	20	2019-12-11 06:00:01	0.21	856.9	0.22	0.01	1.44
-34.5	150.625	20191210	21	2019-12-11 07:00:01	0.2	835.93	0.2	0.01	1.44
-34.5	150.625	20191210	22	2019-12-11 08:00:01	0.23	842.18	0.19	0.01	1.43
-34.5	150.625	20191210	23	2019-12-11 09:00:01	0.32	948.96	0.17	0.01	1.42
-34.5	150.625	20191211	0	2019-12-11 10:00:01	1.07	2642.76	0.34	0.03	1.41
-34.5	150.625	20191211	1	2019-12-11 11:00:01	2.12	5012.03	0.56	0.05	1.41
-34.5	150.625	20191211	2	2019-12-11 12:00:01	2.94	7654.79	0.81	0.07	1.4
-34.5	150.625	20191211	3	2019-12-11 13:00:01	2.06	6148.86	0.64	0.06	1.4
-34.5	150.625	20191211	4	2019-12-11 14:00:01	2.41	8282.29	0.84	0.08	1.4
-34.5	150.625	20191211	5	2019-12-11 15:00:01	2.19	8231.4	0.84	0.08	1.4
-34.5	150.625	20191211	6	2019-12-11 16:00:01	1.87	7270.41	0.76	0.07	1.41
-34.5	150.625	20191211	7	2019-12-11 17:00:01	1.46	5316.49	0.6	0.05	1.41
-34.5	150.625	20191211	8	2019-12-11 18:00:01	1.08	3664.68	0.52	0.04	1.42
-34.5	150.625	20191211	9	2019-12-11 19:00:01	0.78	2615.52	0.44	0.03	1.43
-34.5	150.625	20191211	10	2019-12-11 20:00:01	0.56	2031.39	0.36	0.02	1.43
-34.5	150.625	20191211	11	2019-12-11 21:00:01	0.39	1640.65	0.3	0.02	1.43
-34.5	150.625	20191211	12	2019-12-11 22:00:01	0.31	1417.87	0.28	0.01	1.43
-34.5	150.625	20191211	13	2019-12-11 23:00:01	0.28	1299.07	0.28	0.01	1.44
-34.5	150.625	20191211	14	2019-12-12 00:00:01	0.26	1213.51	0.26	0.01	1.44
-34.5	150.625	20191211	15	2019-12-12 01:00:01	0.24	1156.81	0.25	0.01	1.44
-34.5	150.625	20191211	16	2019-12-12 02:00:01	0.24	1121.81	0.25	0.01	1.43
-34.5	150.625	20191211	17	2019-12-12 03:00:01	0.25	1097.74	0.25	0.01	1.44
-34.5	150.625	20191211	18	2019-12-12 04:00:01	0.27	1070.9	0.27	0.01	1.45
-34.5	150.625	20191211	19	2019-12-12 05:00:01	0.27	1042.05	0.26	0.01	1.45
-34.5	150.625	20191211	20	2019-12-12 06:00:01	0.27	999.54	0.24	0.01	1.44
-34.5	150.625	20191211	21	2019-12-12 07:00:01	0.3	973.63	0.23	0.01	1.43
-34.5	150.625	20191211	22	2019-12-12 08:00:01	0.36	1006.12	0.23	0.01	1.45
-34.5	150.625	20191211	23	2019-12-12 09:00:01	0.54	1285.54	0.27	0.01	1.45
-34.5	150.625	20191212	0	2019-12-12 10:00:01	0.95	2496.94	0.39	0.02	1.43
-34.5	150.625	20191212	1	2019-12-12 11:00:01	1.33	3574.11	0.48	0.03	1.42
-34.5	150.625	20191212	2	2019-12-12 12:00:01	1.63	4674.4	0.56	0.04	1.41
-34.5	150.625	20191212	3	2019-12-12 13:00:01	2.14	6556.31	0.72	0.06	1.4
-34.5	150.625	20191212	4	2019-12-12 14:00:01	2.12	6833.35	0.73	0.06	1.4
-34.5	150.625	20191212	5	2019-12-12 15:00:01	1.84	6214.8	0.68	0.06	1.4
-34.5	150.625	20191212	6	2019-12-12 16:00:01	1.5	5197.4	0.62	0.05	1.41
-34.5	150.625	20191212	7	2019-12-12 17:00:01	1.2	4241.88	0.61	0.04	1.42
-34.5	150.625	20191212	8	2019-12-12 18:00:01	0.94	3399.14	0.59	0.03	1.44
-34.5	150.625	20191212	9	2019-12-12 19:00:01	0.71	2786.03	0.6	0.03	1.44
-34.5	150.625	20191212	10	2019-12-12 20:00:01	0.52	2354.28	0.54	0.02	1.45
-34.5	150.625	20191212	11	2019-12-12 21:00:01	0.39	2011.42	0.5	0.02	1.46
-34.5	150.625	20191212	12	2019-12-12 22:00:01	0.33	1739.87	0.48	0.02	1.47
-34.5	150.625	20191212	13	2019-12-12 23:00:01	0.31	1526.38	0.42	0.02	1.47
-34.5	150.625	20191212	14	2019-12-13 00:00:01	0.3	1355.3	0.36	0.01	1.46
-34.5	150.625	20191212	15	2019-12-13 01:00:01	0.31	1212.59	0.34	0.01	1.47
-34.5	150.625	20191212	16	2019-12-13 02:00:01	0.37	1104.69	0.33	0.01	1.48
-34.5	150.625	20191212	17	2019-12-13 03:00:01	0.45	1005.53	0.3	0.01	1.48
-34.5	150.625	20191212	18	2019-12-13 04:00:01	0.53	910.14	0.31	0.01	1.49
-34.5	150.625	20191212	19	2019-12-13 05:00:01	0.57	821.9	0.29	0.01	1.51
-34.5	150.625	20191212	20	2019-12-13 06:00:01	0.41	775.3	0.25	0.01	1.51
-34.5	150.625	20191212	21	2019-12-13 07:00:01	0.29	759.84	0.23	0.01	1.48
-34.5	150.625	20191212	22	2019-12-13 08:00:01	0.3	782.29	0.25	0.01	1.5
-34.5	150.625	20191212	23	2019-12-13 09:00:01	0.38	940.19	0.29	0.01	1.5
-34.5	150.625	20191213	0	2019-12-13 10:00:01	0.52	1313.08	0.42	0.01	1.5
-34.5	150.625	20191213	1	2019-12-13 11:00:01	0.68	1797.51	0.53	0.02	1.48
-34.5	150.625	20191213	2	2019-12-13 12:00:01	0.83	2401	0.57	0.03	1.46
-34.5	150.625	20191213	3	2019-12-13 13:00:01	0.97	3059.33	0.62	0.03	1.44
-34.5	150.625	20191213	4	2019-12-13 14:00:01	1.04	3436.27	0.65	0.03	1.43
-34.5	150.625	20191213	5	2019-12-13 15:00:01	0.99	3338.2	0.6	0.03	1.43
-34.5	150.625	20191213	6	2019-12-13 16:00:01	0.84	2965.54	0.55	0.03	1.44
-34.5	150.625	20191213	7	2019-12-13 17:00:01	0.69	2474.11	0.51	0.03	1.45
-34.5	150.625	20191213	8	2019-12-13 18:00:01	0.56	1987.74	0.44	0.02	1.46
-34.5	150.625	20191213	9	2019-12-13 19:00:01	0.48	1566.62	0.44	0.02	1.46
-34.5	150.625	20191213	10	2019-12-13 20:00:01	0.46	1293.71	0.41	0.01	1.48
-34.5	150.625	20191213	11	2019-12-13 21:00:01	0.47	1146.72	0.36	0.01	1.51
-34.5	150.625	20191213	12	2019-12-13 22:00:01	0.54	1056.13	0.38	0.01	1.51
-34.5	150.625	20191213	13	2019-12-13 23:00:01	0.64	993.02	0.36	0.01	1.49
-34.5	150.625	20191213	14	2019-12-14 00:00:01	0.67	982.22	0.33	0.01	1.49
-34.5	150.625	20191213	15	2019-12-14 01:00:01	0.7	998.21	0.34	0.01	1.47
-34.5	150.625	20191213	16	2019-12-14 02:00:01	0.75	978.71	0.31	0.01	1.46
-34.5	150.625	20191213	17	2019-12-14 03:00:01	0.85	943.81	0.26	0.01	1.46
-34.5	150.625	20191213	18	2019-12-14 04:00:01	0.99	925.58	0.22	0.01	1.45
-34.5	150.625	20191213	19	2019-12-14 05:00:01	1.08	940.99	0.18	0.01	1.44
-34.5	150.625	20191213	20	2019-12-14 06:00:01	0.94	943.03	0.15	0.01	1.43
-34.5	150.625	20191213	21	2019-12-14 07:00:01	0.64	938.32	0.14	0.01	1.44
-34.5	150.625	20191213	22	2019-12-14 08:00:01	0.53	907.15	0.12	0.01	1.43
-34.5	150.625	20191213	23	2019-12-14 09:00:01	0.42	888.77	0.1	0.01	1.42
-34.5	150.625	20191214	0	2019-12-14 10:00:01	0.97	2776.89	0.28	0.03	1.41
-34.5	150.625	20191214	1	2019-12-14 11:00:01	2.54	6493.99	0.62	0.06	1.41
-34.5	150.625	20191214	2	2019-12-14 12:00:01	4.1	10889.6	1.02	0.1	1.41
-34.5	150.625	20191214	3	2019-12-14 13:00:01	3.07	8844.47	0.88	0.08	1.41
-34.5	150.625	20191214	4	2019-12-14 14:00:01	3.95	12007.1	1.21	0.11	1.41
-34.5	150.625	20191214	5	2019-12-14 15:00:01	3.6	11910	1.22	0.11	1.42
-34.5	150.625	20191214	6	2019-12-14 16:00:01	2.54	9257.32	0.99	0.09	1.41
-34.5	150.625	20191214	7	2019-12-14 17:00:01	1.73	6320.9	0.75	0.06	1.42
-34.5	150.625	20191214	8	2019-12-14 18:00:01	1.27	4109.88	0.62	0.04	1.44
-34.5	150.625	20191214	9	2019-12-14 19:00:01	1.06	2896.38	0.63	0.03	1.46
-34.5	150.625	20191214	10	2019-12-14 20:00:01	1.08	2302.05	0.54	0.02	1.45
-34.5	150.625	20191214	11	2019-12-14 21:00:01	0.95	1936.02	0.44	0.02	1.45
-34.5	150.625	20191214	12	2019-12-14 22:00:01	1.09	1713.6	0.47	0.02	1.46
-34.5	150.625	20191214	13	2019-12-14 23:00:01	1.22	1553.21	0.44	0.02	1.47
-34.5	150.625	20191214	14	2019-12-15 00:00:01	1.08	1388.06	0.36	0.01	1.47
-34.5	150.625	20191214	15	2019-12-15 01:00:01	0.95	1238.6	0.36	0.01	1.48
-34.5	150.625	20191214	16	2019-12-15 02:00:01	1	1148.57	0.33	0.01	1.48
-34.5	150.625	20191214	17	2019-12-15 03:00:01	1.13	1112.44	0.28	0.01	1.47
-34.5	150.625	20191214	18	2019-12-15 04:00:01	1.23	1088.76	0.29	0.01	1.47
-34.5	150.625	20191214	19	2019-12-15 05:00:01	1.41	1139.55	0.29	0.01	1.46
-34.5	150.625	20191214	20	2019-12-15 06:00:01	1.18	1216.72	0.27	0.01	1.46
-34.5	150.625	20191214	21	2019-12-15 07:00:01	1.07	1339.69	0.25	0.01	1.46
-34.5	150.625	20191214	22	2019-12-15 08:00:01	1.16	1611.82	0.23	0.02	1.43
-34.5	150.625	20191214	23	2019-12-15 09:00:01	1.39	2224.13	0.26	0.02	1.42
-34.5	150.625	20191215	0	2019-12-15 10:00:01	3.19	6067.11	0.6	0.06	1.41
-34.5	150.625	20191215	1	2019-12-15 11:00:01	5.58	11858.4	1.11	0.11	1.41
-34.5	150.625	20191215	2	2019-12-15 12:00:01	7.24	16888.1	1.56	0.16	1.41
-34.5	150.625	20191215	3	2019-12-15 13:00:01	8.04	19809.2	1.82	0.19	1.41
-34.5	150.625	20191215	4	2019-12-15 14:00:01	7.43	18520.3	1.68	0.17	1.41
-34.5	150.625	20191215	5	2019-12-15 15:00:01	5.09	11348.9	1.03	0.11	1.41
-34.5	150.625	20191215	6	2019-12-15 16:00:01	2.75	4574.07	0.42	0.04	1.42
-34.5	150.625	20191215	7	2019-12-15 17:00:01	1.45	2227.67	0.23	0.02	1.43
-34.5	150.625	20191215	8	2019-12-15 18:00:01	0.86	1449.34	0.16	0.01	1.43
-34.5	150.625	20191215	9	2019-12-15 19:00:01	0.68	1094.78	0.12	0.01	1.43
-34.5	150.625	20191215	10	2019-12-15 20:00:01	0.67	951.48	0.1	0.01	1.43
-34.5	150.625	20191215	11	2019-12-15 21:00:01	0.98	810.27	0.09	0.01	1.43
-34.5	150.625	20191215	12	2019-12-15 22:00:01	1.77	798.57	0.09	0.01	1.43
-34.5	150.625	20191215	13	2019-12-15 23:00:01	2.18	847.31	0.09	0.01	1.43
-34.5	150.625	20191215	14	2019-12-16 00:00:01	1.92	815.56	0.09	0.01	1.42
-34.5	150.625	20191215	15	2019-12-16 01:00:01	1.6	764.44	0.09	0.01	1.43
-34.5	150.625	20191215	16	2019-12-16 02:00:01	1.53	741.2	0.09	0.01	1.42
-34.5	150.625	20191215	17	2019-12-16 03:00:01	1.57	731.98	0.1	0.01	1.43
-34.5	150.625	20191215	18	2019-12-16 04:00:01	1.04	693.17	0.15	0.01	1.45
-34.5	150.625	20191215	19	2019-12-16 05:00:01	0.7	626.39	0.17	0.01	1.47
-34.5	150.625	20191215	20	2019-12-16 06:00:01	0.37	553.95	0.15	0.01	1.47
-34.5	150.625	20191215	21	2019-12-16 07:00:01	0.28	550.5	0.15	0.01	1.46
-34.5	150.625	20191215	22	2019-12-16 08:00:01	0.35	693.18	0.17	0.01	1.45
-34.5	150.625	20191215	23	2019-12-16 09:00:01	0.7	1345.47	0.27	0.01	1.44
-34.5	150.625	20191216	0	2019-12-16 10:00:01	1.51	3110.62	0.49	0.03	1.43
-34.5	150.625	20191216	1	2019-12-16 11:00:01	2.49	5364.77	0.74	0.05	1.42
-34.5	150.625	20191216	2	2019-12-16 12:00:01	3.26	7395.31	0.92	0.07	1.41
-34.5	150.625	20191216	3	2019-12-16 13:00:01	3.2	7455.03	0.91	0.07	1.41
-34.5	150.625	20191216	4	2019-12-16 14:00:01	3.78	9236.12	1.21	0.09	1.42
-34.5	150.625	20191216	5	2019-12-16 15:00:01	3.18	8483.92	1.26	0.08	1.43
-34.5	150.625	20191216	6	2019-12-16 16:00:01	2.19	6692.33	1.08	0.07	1.43
-34.5	150.625	20191216	7	2019-12-16 17:00:01	1.39	5146.03	0.82	0.05	1.42
-34.5	150.625	20191216	8	2019-12-16 18:00:01	0.91	3837.51	0.6	0.04	1.42
-34.5	150.625	20191216	9	2019-12-16 19:00:01	0.75	2821.92	0.51	0.03	1.43
-34.5	150.625	20191216	10	2019-12-16 20:00:01	0.68	2098.24	0.44	0.02	1.43
-34.5	150.625	20191216	11	2019-12-16 21:00:01	0.61	1597.81	0.34	0.02	1.43
-34.5	150.625	20191216	12	2019-12-16 22:00:01	0.63	1290.56	0.29	0.01	1.44
-34.5	150.625	20191216	13	2019-12-16 23:00:01	0.93	1133.82	0.26	0.01	1.45
-34.5	150.625	20191216	14	2019-12-17 00:00:01	0.83	1062.35	0.23	0.01	1.45
-34.5	150.625	20191216	15	2019-12-17 01:00:01	0.74	1053.18	0.23	0.01	1.45
-34.5	150.625	20191216	16	2019-12-17 02:00:01	0.78	1092.74	0.21	0.01	1.45
-34.5	150.625	20191216	17	2019-12-17 03:00:01	0.93	1155.86	0.19	0.01	1.43
-34.5	150.625	20191216	18	2019-12-17 04:00:01	0.87	1215.03	0.18	0.01	1.42
-34.5	150.625	20191216	19	2019-12-17 05:00:01	0.61	1244.09	0.18	0.01	1.42
-34.5	150.625	20191216	20	2019-12-17 06:00:01	0.49	1265.43	0.17	0.01	1.41
-34.5	150.625	20191216	21	2019-12-17 07:00:01	0.43	1303.75	0.15	0.01	1.41
-34.5	150.625	20191216	22	2019-12-17 08:00:01	0.51	1398.24	0.15	0.01	1.41
-34.5	150.625	20191216	23	2019-12-17 09:00:01	0.85	1780.73	0.18	0.02	1.4
-34.5	150.625	20191217	0	2019-12-17 10:00:01	1.99	4087.38	0.36	0.04	1.4
-34.5	150.625	20191217	1	2019-12-17 11:00:01	2.37	4782.04	0.42	0.04	1.4
-34.5	150.625	20191217	2	2019-12-17 12:00:01	2.59	5211.72	0.46	0.05	1.4
-34.5	150.625	20191217	3	2019-12-17 13:00:01	3.23	6720.34	0.57	0.06	1.4
-34.5	150.625	20191217	4	2019-12-17 14:00:01	3.37	7104.28	0.6	0.07	1.4
-34.5	150.625	20191217	5	2019-12-17 15:00:01	3.04	6827.13	0.56	0.06	1.4
-34.5	150.625	20191217	6	2019-12-17 16:00:01	2.57	6326.4	0.5	0.06	1.4
-34.5	150.625	20191217	7	2019-12-17 17:00:01	2.21	5658.09	0.44	0.05	1.4
-34.5	150.625	20191217	8	2019-12-17 18:00:01	1.87	5027.04	0.4	0.05	1.41
-34.5	150.625	20191217	9	2019-12-17 19:00:01	1.64	4518.81	0.37	0.04	1.41
-34.5	150.625	20191217	10	2019-12-17 20:00:01	1.68	4014.01	0.34	0.04	1.41
-34.5	150.625	20191217	11	2019-12-17 21:00:01	1.8	3667.81	0.32	0.03	1.41
-34.5	150.625	20191217	12	2019-12-17 22:00:01	2.06	3651.39	0.33	0.03	1.41
-34.5	150.625	20191217	13	2019-12-17 23:00:01	2.35	3942.26	0.35	0.04	1.41
-34.5	150.625	20191217	14	2019-12-18 00:00:01	2.56	4333.51	0.37	0.04	1.41
-34.5	150.625	20191217	15	2019-12-18 01:00:01	2.78	4743.36	0.39	0.04	1.4
-34.5	150.625	20191217	16	2019-12-18 02:00:01	3.07	5204.91	0.42	0.05	1.4
-34.5	150.625	20191217	17	2019-12-18 03:00:02	3.41	5562.52	0.44	0.05	1.4
-34.5	150.625	20191217	18	2019-12-18 04:00:02	3.77	5650.57	0.46	0.05	1.4
-34.5	150.625	20191217	19	2019-12-18 05:00:02	4.07	5691.13	0.47	0.05	1.41
-34.5	150.625	20191217	20	2019-12-18 06:00:02	3.45	5812.48	0.47	0.05	1.41
-34.5	150.625	20191217	21	2019-12-18 07:00:02	2.27	5982.84	0.47	0.06	1.41
-34.5	150.625	20191217	22	2019-12-18 08:00:02	1.62	6216.01	0.47	0.06	1.41
-34.5	150.625	20191217	23	2019-12-18 09:00:02	1.38	6622.12	0.48	0.06	1.4
-34.5	150.625	20191218	0	2019-12-18 10:00:02	2.29	7733.31	0.57	0.07	1.4
-34.5	150.625	20191218	1	2019-12-18 11:00:02	4.94	12971.4	0.98	0.12	1.4
-34.5	150.625	20191218	2	2019-12-18 12:00:02	7.83	20149.9	1.55	0.19	1.4
-34.5	150.625	20191218	3	2019-12-18 13:00:02	7.15	19283.2	1.48	0.18	1.4
-34.5	150.625	20191218	4	2019-12-18 14:00:02	9	25707.2	2.02	0.24	1.4
-34.5	150.625	20191218	5	2019-12-18 15:00:02	10	30186.2	2.43	0.28	1.4
-34.5	150.625	20191218	6	2019-12-18 16:00:02	10.11	28405.8	2.32	0.26	1.4
-34.5	150.625	20191218	7	2019-12-18 17:00:02	8.66	27832.2	2.29	0.26	1.4
-34.5	150.625	20191218	8	2019-12-18 18:00:02	6.76	26938.2	2.21	0.25	1.4
-34.5	150.625	20191218	9	2019-12-18 19:00:02	6.17	26245.5	2.13	0.24	1.4
-34.5	150.625	20191218	10	2019-12-18 20:00:02	7.59	24509.6	1.98	0.23	1.4
-34.5	150.625	20191218	11	2019-12-18 21:00:02	10.62	21648.9	1.75	0.2	1.4
-34.5	150.625	20191218	12	2019-12-18 22:00:02	16.6	18870.1	1.53	0.18	1.4
-34.5	150.625	20191218	13	2019-12-18 23:00:02	24.03	17134.4	1.4	0.16	1.4
-34.5	150.625	20191218	14	2019-12-19 00:00:02	31.16	16498.1	1.35	0.15	1.4
-34.5	150.625	20191218	15	2019-12-19 01:00:02	37.35	16542.9	1.36	0.15	1.4
-34.5	150.625	20191218	16	2019-12-19 02:00:02	41.62	16455.5	1.34	0.15	1.4
-34.5	150.625	20191218	17	2019-12-19 03:00:02	42	15808	1.26	0.15	1.4
-34.5	150.625	20191218	18	2019-12-19 04:00:02	39.45	14224.1	1.12	0.13	1.4
-34.5	150.625	20191218	19	2019-12-19 05:00:02	33.25	11937.8	0.92	0.11	1.4
-34.5	150.625	20191218	20	2019-12-19 06:00:02	25.28	9671.49	0.73	0.09	1.4
-34.5	150.625	20191218	21	2019-12-19 07:00:02	16.1	8087.35	0.6	0.08	1.4
-34.5	150.625	20191218	22	2019-12-19 08:00:02	7.32	7199.56	0.54	0.07	1.41
-34.5	150.625	20191218	23	2019-12-19 09:00:02	3.27	7538.25	0.6	0.07	1.41
-34.5	150.625	20191219	0	2019-12-19 10:00:02	4.32	10441.9	0.89	0.1	1.41
-34.5	150.625	20191219	1	2019-12-19 11:00:02	6.6	16868	1.45	0.16	1.41
-34.5	150.625	20191219	2	2019-12-19 12:00:02	8.59	25399.2	2.37	0.24	1.41
-34.5	150.625	20191219	3	2019-12-19 13:00:02	3.43	12526.3	1.34	0.12	1.43
-34.5	150.625	20191219	4	2019-12-19 14:00:02	5.19	19630.5	2.02	0.19	1.42
-34.5	150.625	20191219	5	2019-12-19 15:00:02	5.47	22059.4	2.09	0.21	1.41
-34.5	150.625	20191219	6	2019-12-19 16:00:02	4.46	20375.6	1.87	0.19	1.4
-34.5	150.625	20191219	7	2019-12-19 17:00:02	3.16	16411.8	1.52	0.15	1.4
-34.5	150.625	20191219	8	2019-12-19 18:00:02	1.86	13185.7	1.22	0.12	1.4
-34.5	150.625	20191219	9	2019-12-19 19:00:02	1.33	11487.1	1.06	0.11	1.4
-34.5	150.625	20191219	10	2019-12-19 20:00:02	1.28	10410.7	0.97	0.1	1.4
-34.5	150.625	20191219	11	2019-12-19 21:00:02	1.4	9297.12	0.87	0.09	1.4
-34.5	150.625	20191219	12	2019-12-19 22:00:02	1.86	8228.48	0.78	0.08	1.4
-34.5	150.625	20191219	13	2019-12-19 23:00:02	2.47	7091.19	0.68	0.07	1.4
-34.5	150.625	20191219	14	2019-12-20 00:00:02	2.68	5972.75	0.58	0.06	1.41
-34.5	150.625	20191219	15	2019-12-20 01:00:02	2.91	5297.58	0.52	0.05	1.41
-34.5	150.625	20191219	16	2019-12-20 02:00:02	3.18	5007.76	0.51	0.05	1.41
-34.5	150.625	20191219	17	2019-12-20 03:00:02	3.51	4891.14	0.52	0.05	1.41
-34.5	150.625	20191219	18	2019-12-20 04:00:02	3.49	4800.57	0.52	0.05	1.42
-34.5	150.625	20191219	19	2019-12-20 05:00:02	2.71	4682	0.49	0.04	1.41
-34.5	150.625	20191219	20	2019-12-20 06:00:02	1.64	4507.56	0.43	0.04	1.41
-34.5	150.625	20191219	21	2019-12-20 07:00:02	0.99	4312.41	0.39	0.04	1.41
-34.5	150.625	20191219	22	2019-12-20 08:00:02	1	4208.67	0.38	0.04	1.41
-34.5	150.625	20191219	23	2019-12-20 09:00:02	1.7	4507.77	0.41	0.04	1.41
-34.5	150.625	20191220	0	2019-12-20 10:00:02	4.67	8485.27	0.77	0.08	1.4
-34.5	150.625	20191220	1	2019-12-20 11:00:02	9.61	17877.1	1.6	0.17	1.4
-34.5	150.625	20191220	2	2019-12-20 12:00:02	13.8	27675.5	2.46	0.26	1.4
-34.5	150.625	20191220	3	2019-12-20 13:00:02	8.69	20780.6	1.83	0.19	1.4
-34.5	150.625	20191220	4	2019-12-20 14:00:02	12.17	29849.1	2.63	0.28	1.4
-34.5	150.625	20191220	5	2019-12-20 15:00:02	11.08	32628.2	2.85	0.3	1.4
-34.5	150.625	20191220	6	2019-12-20 16:00:02	4.55	16734	1.45	0.16	1.4
-34.5	150.625	20191220	7	2019-12-20 17:00:02	4.24	16935.8	1.47	0.16	1.4
-34.5	150.625	20191220	8	2019-12-20 18:00:02	3.47	16848.7	1.46	0.16	1.4
-34.5	150.625	20191220	9	2019-12-20 19:00:02	3.54	16260.5	1.4	0.15	1.4
-34.5	150.625	20191220	10	2019-12-20 20:00:02	3.67	15380.6	1.33	0.14	1.4
-34.5	150.625	20191220	11	2019-12-20 21:00:02	3.6	14352.9	1.25	0.13	1.4
-34.5	150.625	20191220	12	2019-12-20 22:00:02	3.91	13524	1.19	0.13	1.4
-34.5	150.625	20191220	13	2019-12-20 23:00:02	4.32	12927.6	1.15	0.12	1.4
-34.5	150.625	20191220	14	2019-12-21 00:00:02	4.39	12540.4	1.13	0.12	1.4
-34.5	150.625	20191220	15	2019-12-21 01:00:02	4.53	12411.2	1.11	0.12	1.4
-34.5	150.625	20191220	16	2019-12-21 02:00:02	5.35	12424	1.12	0.12	1.4
-34.5	150.625	20191220	17	2019-12-21 03:00:02	6.44	12414.9	1.13	0.12	1.41
-34.5	150.625	20191220	18	2019-12-21 04:00:02	7.79	12056.9	1.13	0.11	1.41
-34.5	150.625	20191220	19	2019-12-21 05:00:02	9.21	10983.7	1.05	0.1	1.41
-34.5	150.625	20191220	20	2019-12-21 06:00:02	10	9587.42	0.89	0.09	1.4
-34.5	150.625	20191220	21	2019-12-21 07:00:02	9.97	8976.46	0.79	0.08	1.4
-34.5	150.625	20191220	22	2019-12-21 08:00:02	9.42	9211.67	0.8	0.09	1.4
-34.5	150.625	20191220	23	2019-12-21 09:00:02	10.04	10705.7	0.93	0.1	1.41
-34.5	150.625	20191221	0	2019-12-21 10:00:02	11.5	18356.5	1.54	0.17	1.4
-34.5	150.625	20191221	1	2019-12-21 11:00:02	17.71	35946.7	2.89	0.33	1.4
-34.5	150.625	20191221	2	2019-12-21 12:00:02	21.27	53396.5	4.3	0.5	1.4
-34.5	150.625	20191221	3	2019-12-21 13:00:02	7.63	26688.2	2.26	0.25	1.4
-34.5	150.625	20191221	4	2019-12-21 14:00:02	15.39	51267.8	4.28	0.48	1.4
-34.5	150.625	20191221	5	2019-12-21 15:00:02	15.95	56015.4	4.8	0.52	1.4
-34.5	150.625	20191221	6	2019-12-21 16:00:02	11.08	40501.8	3.67	0.38	1.4
-34.5	150.625	20191221	7	2019-12-21 17:00:02	7.53	23634.2	2.24	0.22	1.4
-34.5	150.625	20191221	8	2019-12-21 18:00:02	5.3	16386.5	1.66	0.15	1.41
-34.5	150.625	20191221	9	2019-12-21 19:00:02	3.74	12355.5	1.38	0.12	1.41
-34.5	150.625	20191221	10	2019-12-21 20:00:02	2.59	8427.35	0.99	0.08	1.41
-34.5	150.625	20191221	11	2019-12-21 21:00:02	1.95	6186.63	0.75	0.06	1.41
-34.5	150.625	20191221	12	2019-12-21 22:00:02	1.69	5105.08	0.67	0.05	1.41
-34.5	150.625	20191221	13	2019-12-21 23:00:02	1.49	4389.81	0.65	0.04	1.42
-34.5	150.625	20191221	14	2019-12-22 00:00:02	1.17	3667.55	0.63	0.04	1.44
-34.5	150.625	20191221	15	2019-12-22 01:00:02	0.91	3050.29	0.57	0.03	1.45
-34.5	150.625	20191221	16	2019-12-22 02:00:02	0.74	2656.65	0.48	0.03	1.43
-34.5	150.625	20191221	17	2019-12-22 03:00:02	0.71	2566.88	0.44	0.03	1.43
-34.5	150.625	20191221	18	2019-12-22 04:00:02	0.74	2576.9	0.44	0.03	1.42
-34.5	150.625	20191221	19	2019-12-22 05:00:02	0.74	2471.31	0.45	0.02	1.43
-34.5	150.625	20191221	20	2019-12-22 06:00:02	0.68	2540.85	0.46	0.03	1.44
-34.5	150.625	20191221	21	2019-12-22 07:00:02	0.73	2865.87	0.5	0.03	1.45
-34.5	150.625	20191221	22	2019-12-22 08:00:02	1.01	3024.67	0.55	0.03	1.45
-34.5	150.625	20191221	23	2019-12-22 09:00:02	2.12	3750.88	0.7	0.04	1.45
-34.5	150.625	20191222	0	2019-12-22 10:00:02	4.24	7439.04	1.2	0.07	1.44
-34.5	150.625	20191222	1	2019-12-22 11:00:02	6.61	14293.7	1.89	0.14	1.42
-34.5	150.625	20191222	2	2019-12-22 12:00:02	8.47	18947	2.18	0.18	1.41
-34.5	150.625	20191222	3	2019-12-22 13:00:02	11.85	23111.1	2.66	0.22	1.41
-34.5	150.625	20191222	4	2019-12-22 14:00:02	11.3	22715.2	2.53	0.22	1.41
-34.5	150.625	20191222	5	2019-12-22 15:00:02	9.27	20077.1	2.22	0.19	1.41
-34.5	150.625	20191222	6	2019-12-22 16:00:02	3.08	11175.1	1.11	0.11	1.41
-34.5	150.625	20191222	7	2019-12-22 17:00:02	2.79	11734.9	1.12	0.11	1.41
-34.5	150.625	20191222	8	2019-12-22 18:00:02	2.15	10639.9	1	0.1	1.41
-34.5	150.625	20191222	9	2019-12-22 19:00:02	1.59	9000.82	0.86	0.09	1.41
-34.5	150.625	20191222	10	2019-12-22 20:00:02	1.28	7580.99	0.74	0.07	1.41
-34.5	150.625	20191222	11	2019-12-22 21:00:02	1.04	6698.14	0.67	0.06	1.42
-34.5	150.625	20191222	12	2019-12-22 22:00:02	0.91	6322.66	0.64	0.06	1.41
-34.5	150.625	20191222	13	2019-12-22 23:00:02	0.92	6587.67	0.66	0.06	1.41
-34.5	150.625	20191222	14	2019-12-23 00:00:02	0.93	6889.32	0.66	0.07	1.41
-34.5	150.625	20191222	15	2019-12-23 01:00:02	0.94	6837.22	0.65	0.06	1.41
-34.5	150.625	20191222	16	2019-12-23 02:00:02	0.93	6444.54	0.62	0.06	1.41
-34.5	150.625	20191222	17	2019-12-23 03:00:02	0.97	5975.89	0.59	0.06	1.41
-34.5	150.625	20191222	18	2019-12-23 04:00:02	0.98	5604.23	0.58	0.05	1.41
-34.5	150.625	20191222	19	2019-12-23 05:00:02	0.95	5374.8	0.57	0.05	1.41
-34.5	150.625	20191222	20	2019-12-23 06:00:02	0.75	5309.22	0.58	0.05	1.41
-34.5	150.625	20191222	21	2019-12-23 07:00:02	0.62	5336.55	0.63	0.05	1.42
-34.5	150.625	20191222	22	2019-12-23 08:00:02	0.75	5556.06	0.67	0.05	1.42
-34.5	150.625	20191222	23	2019-12-23 09:00:02	1.23	6346.1	0.75	0.06	1.41
-34.5	150.625	20191223	0	2019-12-23 10:00:02	2.33	8901.92	1.02	0.08	1.41
-34.5	150.625	20191223	1	2019-12-23 11:00:02	3.34	10620	1.2	0.1	1.41
-34.5	150.625	20191223	2	2019-12-23 12:00:02	4.19	12508.8	1.39	0.12	1.41
-34.5	150.625	20191223	3	2019-12-23 13:00:02	2.07	6868.92	0.7	0.06	1.41
-34.5	150.625	20191223	4	2019-12-23 14:00:02	2.69	9489.78	0.94	0.09	1.4
-34.5	150.625	20191223	5	2019-12-23 15:00:02	2.5	10900.8	1.06	0.1	1.4
-34.5	150.625	20191223	6	2019-12-23 16:00:02	1.94	11786.8	1.15	0.11	1.4
-34.5	150.625	20191223	7	2019-12-23 17:00:02	1.49	12645.2	1.25	0.12	1.41
-34.5	150.625	20191223	8	2019-12-23 18:00:02	1.26	13268	1.35	0.12	1.41
-34.5	150.625	20191223	9	2019-12-23 19:00:02	1.2	13587.9	1.44	0.13	1.41
-34.5	150.625	20191223	10	2019-12-23 20:00:02	1.2	13290	1.44	0.13	1.41
-34.5	150.625	20191223	11	2019-12-23 21:00:02	1.18	12440.3	1.38	0.12	1.41
-34.5	150.625	20191223	12	2019-12-23 22:00:02	1.25	11288.3	1.34	0.11	1.41
-34.5	150.625	20191223	13	2019-12-23 23:00:02	1.27	9953.95	1.22	0.1	1.42
-34.5	150.625	20191223	14	2019-12-24 00:00:02	1.12	8795.02	1.08	0.08	1.42
-34.5	150.625	20191223	15	2019-12-24 01:00:02	0.96	7755.68	1	0.08	1.42
-34.5	150.625	20191223	16	2019-12-24 02:00:02	0.95	6967.85	0.91	0.07	1.42
-34.5	150.625	20191223	17	2019-12-24 03:00:02	1	6364.38	0.81	0.06	1.42
-34.5	150.625	20191223	18	2019-12-24 04:00:02	1.05	5762.71	0.8	0.06	1.42
-34.5	150.625	20191223	19	2019-12-24 05:00:02	1.08	5356.67	0.79	0.05	1.42
-34.5	150.625	20191223	20	2019-12-24 06:00:02	0.9	5192.87	0.77	0.05	1.43
-34.5	150.625	20191223	21	2019-12-24 07:00:02	0.57	5149.88	0.8	0.05	1.43
-34.5	150.625	20191223	22	2019-12-24 08:00:02	0.59	5135.27	0.85	0.05	1.43
-34.5	150.625	20191223	23	2019-12-24 09:00:02	0.78	5275.59	0.86	0.05	1.44
-34.5	150.625	20191224	0	2019-12-24 10:00:02	0.91	5756.45	1.16	0.06	1.46
-34.5	150.625	20191224	1	2019-12-24 11:00:02	1.2	4827.6	0.95	0.05	1.45
-34.5	150.625	20191224	2	2019-12-24 12:00:02	1.19	4455.31	0.83	0.05	1.45
-34.5	150.625	20191224	3	2019-12-24 13:00:02	1.22	5539.94	0.97	0.06	1.44
-34.5	150.625	20191224	4	2019-12-24 14:00:02	1.19	5556.96	0.96	0.06	1.44
-34.5	150.625	20191224	5	2019-12-24 15:00:02	1.1	5501.52	0.95	0.06	1.45
-34.5	150.625	20191224	6	2019-12-24 16:00:02	1.03	5315.02	0.93	0.05	1.44
-34.5	150.625	20191224	7	2019-12-24 17:00:02	0.96	5070.85	0.91	0.05	1.45
-34.5	150.625	20191224	8	2019-12-24 18:00:02	0.99	4800.98	0.83	0.05	1.45
-34.5	150.625	20191224	9	2019-12-24 19:00:02	1.09	4527.45	0.75	0.05	1.44
-34.5	150.625	20191224	10	2019-12-24 20:00:02	0.8	4370.6	0.69	0.04	1.44
-34.5	150.625	20191224	11	2019-12-24 21:00:02	0.61	4292.42	0.66	0.04	1.44
-34.5	150.625	20191224	12	2019-12-24 22:00:02	0.5	4240.47	0.63	0.04	1.43
-34.5	150.625	20191224	13	2019-12-24 23:00:02	0.47	4173.6	0.56	0.04	1.42
-34.5	150.625	20191224	14	2019-12-25 00:00:02	0.54	4112.22	0.53	0.04	1.42
-34.5	150.625	20191224	15	2019-12-25 01:00:02	0.55	4024.64	0.54	0.04	1.42
-34.5	150.625	20191224	16	2019-12-25 02:00:02	0.49	3975.97	0.51	0.04	1.42
-34.5	150.625	20191224	17	2019-12-25 03:00:02	0.47	3888.25	0.48	0.04	1.42
-34.5	150.625	20191224	18	2019-12-25 04:00:02	0.49	3769.83	0.49	0.04	1.42
-34.5	150.625	20191224	19	2019-12-25 05:00:02	0.52	3638.91	0.48	0.04	1.42
-34.5	150.625	20191224	20	2019-12-25 06:00:02	0.48	3484.8	0.46	0.03	1.42
-34.5	150.625	20191224	21	2019-12-25 07:00:02	0.34	3362.93	0.49	0.03	1.43
-34.5	150.625	20191224	22	2019-12-25 08:00:02	0.34	3271.69	0.53	0.03	1.44
-34.5	150.625	20191224	23	2019-12-25 09:00:02	0.41	3215.42	0.52	0.03	1.43
-34.5	150.625	20191225	0	2019-12-25 10:00:02	0.85	3705.96	0.67	0.04	1.44
-34.5	150.625	20191225	1	2019-12-25 11:00:02	1.68	4989.65	0.93	0.05	1.45
-34.5	150.625	20191225	2	2019-12-25 12:00:02	2.39	6087.36	1.04	0.06	1.45
-34.5	150.625	20191225	3	2019-12-25 13:00:02	2.11	5256.48	0.86	0.05	1.45
-34.5	150.625	20191225	4	2019-12-25 14:00:02	2.42	6310.25	1.04	0.06	1.44
-34.5	150.625	20191225	5	2019-12-25 15:00:02	2.12	6471.29	0.95	0.06	1.43
-34.5	150.625	20191225	6	2019-12-25 16:00:02	1.62	6349.56	0.85	0.06	1.42
-34.5	150.625	20191225	7	2019-12-25 17:00:02	1.25	6306.54	0.82	0.06	1.41
-34.5	150.625	20191225	8	2019-12-25 18:00:02	0.99	6287.51	0.8	0.06	1.41
-34.5	150.625	20191225	9	2019-12-25 19:00:02	0.95	6218.5	0.79	0.06	1.41
-34.5	150.625	20191225	10	2019-12-25 20:00:02	0.91	6038	0.76	0.06	1.41
-34.5	150.625	20191225	11	2019-12-25 21:00:02	0.81	5777.42	0.75	0.06	1.41
-34.5	150.625	20191225	12	2019-12-25 22:00:02	0.79	5581.61	0.75	0.05	1.41
-34.5	150.625	20191225	13	2019-12-25 23:00:02	0.78	5467.96	0.75	0.05	1.41
-34.5	150.625	20191225	14	2019-12-26 00:00:02	0.69	5402.96	0.74	0.05	1.42
-34.5	150.625	20191225	15	2019-12-26 01:00:02	0.63	5343.75	0.75	0.05	1.42
-34.5	150.625	20191225	16	2019-12-26 02:00:02	0.63	5277.06	0.74	0.05	1.42
-34.5	150.625	20191225	17	2019-12-26 03:00:02	0.74	5240.46	0.75	0.05	1.42
-34.5	150.625	20191225	18	2019-12-26 04:00:02	0.79	5220.3	0.77	0.05	1.42
-34.5	150.625	20191225	19	2019-12-26 05:00:02	0.77	5168.62	0.76	0.05	1.42
-34.5	150.625	20191225	20	2019-12-26 06:00:02	0.57	5093.76	0.7	0.05	1.42
-34.5	150.625	20191225	21	2019-12-26 07:00:02	0.46	5021.36	0.65	0.05	1.41
-34.5	150.625	20191225	22	2019-12-26 08:00:02	0.62	4993.21	0.62	0.05	1.41
-34.5	150.625	20191225	23	2019-12-26 09:00:02	0.96	5072.13	0.62	0.05	1.41
-34.5	150.625	20191226	0	2019-12-26 10:00:02	1.57	6550.75	0.78	0.06	1.4
-34.5	150.625	20191226	1	2019-12-26 11:00:03	2.02	7465.65	0.87	0.07	1.4
-34.5	150.625	20191226	2	2019-12-26 12:00:03	2.41	8923.99	1.03	0.08	1.41
-34.5	150.625	20191226	3	2019-12-26 13:00:03	2.39	9852.41	1.1	0.09	1.4
-34.5	150.625	20191226	4	2019-12-26 14:00:03	2.16	10721.3	1.17	0.1	1.4
-34.5	150.625	20191226	5	2019-12-26 15:00:03	1.78	11582.8	1.23	0.11	1.4
-34.5	150.625	20191226	6	2019-12-26 16:00:03	1.41	12608.2	1.3	0.12	1.4
-34.5	150.625	20191226	7	2019-12-26 17:00:03	1.22	13976.5	1.42	0.13	1.4
-34.5	150.625	20191226	8	2019-12-26 18:00:03	1.13	15061.1	1.55	0.14	1.4
-34.5	150.625	20191226	9	2019-12-26 19:00:03	1.06	15359.2	1.62	0.14	1.4
-34.5	150.625	20191226	10	2019-12-26 20:00:03	0.96	14718.4	1.6	0.14	1.4
-34.5	150.625	20191226	11	2019-12-26 21:00:03	0.85	13608.2	1.52	0.13	1.4
-34.5	150.625	20191226	12	2019-12-26 22:00:03	0.84	12572.8	1.43	0.12	1.4
-34.5	150.625	20191226	13	2019-12-26 23:00:03	0.86	11701.1	1.34	0.11	1.4
-34.5	150.625	20191226	14	2019-12-27 00:00:03	0.83	11004.5	1.27	0.1	1.4
-34.5	150.625	20191226	15	2019-12-27 01:00:03	0.83	10322.9	1.18	0.1	1.4
-34.5	150.625	20191226	16	2019-12-27 02:00:03	0.85	9722.83	1.08	0.09	1.4
-34.5	150.625	20191226	17	2019-12-27 03:00:03	0.89	9082.18	1	0.08	1.4
-34.5	150.625	20191226	18	2019-12-27 04:00:03	0.91	8441.22	0.92	0.08	1.4
-34.5	150.625	20191226	19	2019-12-27 05:00:03	0.9	7863.61	0.84	0.07	1.4
-34.5	150.625	20191226	20	2019-12-27 06:00:03	0.75	7332.99	0.77	0.07	1.4
-34.5	150.625	20191226	21	2019-12-27 07:00:03	0.47	6911.79	0.7	0.06	1.4
-34.5	150.625	20191226	22	2019-12-27 08:00:03	0.48	6610.64	0.67	0.06	1.4
-34.5	150.625	20191226	23	2019-12-27 09:00:03	0.76	6501.7	0.66	0.06	1.4
-34.5	150.625	20191227	0	2019-12-27 10:00:03	2.19	9861.98	0.99	0.09	1.4
-34.5	150.625	20191227	1	2019-12-27 11:00:03	4.1	12488.4	1.21	0.12	1.4
-34.5	150.625	20191227	2	2019-12-27 12:00:03	5.37	15837.8	1.5	0.15	1.4
-34.5	150.625	20191227	3	2019-12-27 13:00:03	3.56	10969.6	1.04	0.1	1.4
-34.5	150.625	20191227	4	2019-12-27 14:00:03	4.15	14348.9	1.34	0.13	1.4
-34.5	150.625	20191227	5	2019-12-27 15:00:03	3.37	16122.5	1.5	0.15	1.4
-34.5	150.625	20191227	6	2019-12-27 16:00:03	2.3	15422.9	1.43	0.14	1.4
-34.5	150.625	20191227	7	2019-12-27 17:00:03	1.89	15975.3	1.49	0.15	1.4
-34.5	150.625	20191227	8	2019-12-27 18:00:03	1.54	15872.4	1.51	0.15	1.4
-34.5	150.625	20191227	9	2019-12-27 19:00:03	1.35	15545.5	1.51	0.14	1.4
-34.5	150.625	20191227	10	2019-12-27 20:00:03	1.19	15315.7	1.53	0.14	1.4
-34.5	150.625	20191227	11	2019-12-27 21:00:03	1.05	15223.6	1.55	0.14	1.4
-34.5	150.625	20191227	12	2019-12-27 22:00:03	1.11	15208.9	1.58	0.14	1.41
-34.5	150.625	20191227	13	2019-12-27 23:00:03	1.26	15093.3	1.57	0.14	1.41
-34.5	150.625	20191227	14	2019-12-28 00:00:03	1.25	14757.6	1.52	0.14	1.41
-34.5	150.625	20191227	15	2019-12-28 01:00:03	1.21	14197	1.44	0.13	1.4
-34.5	150.625	20191227	16	2019-12-28 02:00:03	1.29	13493.3	1.35	0.13	1.4
-34.5	150.625	20191227	17	2019-12-28 03:00:03	1.51	12816.4	1.27	0.12	1.4
-34.5	150.625	20191227	18	2019-12-28 04:00:03	1.82	12231.1	1.22	0.11	1.4
-34.5	150.625	20191227	19	2019-12-28 05:00:03	2.07	11675.7	1.17	0.11	1.4
-34.5	150.625	20191227	20	2019-12-28 06:00:03	2.07	11132.9	1.11	0.1	1.4
-34.5	150.625	20191227	21	2019-12-28 07:00:03	1.65	10859.8	1.07	0.1	1.4
-34.5	150.625	20191227	22	2019-12-28 08:00:03	1.53	10894.7	1.06	0.1	1.4
-34.5	150.625	20191227	23	2019-12-28 09:00:03	1.92	11506.3	1.11	0.11	1.4
-34.5	150.625	20191228	0	2019-12-28 10:00:03	4.12	16915.7	1.55	0.16	1.4
-34.5	150.625	20191228	1	2019-12-28 11:00:03	7.33	25798	2.26	0.24	1.4
-34.5	150.625	20191228	2	2019-12-28 12:00:03	10.24	37795.1	3.26	0.35	1.4
-34.5	150.625	20191228	3	2019-12-28 13:00:03	4.61	20278.9	1.87	0.19	1.4
-34.5	150.625	20191228	4	2019-12-28 14:00:03	6.66	30396.4	2.87	0.28	1.4
-34.5	150.625	20191228	5	2019-12-28 15:00:03	6.7	38301.6	3.82	0.36	1.4
-34.5	150.625	20191228	6	2019-12-28 16:00:03	5.41	42295.3	4.51	0.4	1.41
-34.5	150.625	20191228	7	2019-12-28 17:00:03	4.41	43249.5	5.05	0.42	1.42
-34.5	150.625	20191228	8	2019-12-28 18:00:03	3.74	41879.5	5.48	0.41	1.42
-34.5	150.625	20191228	9	2019-12-28 19:00:03	3.85	39540.3	5.35	0.39	1.43
-34.5	150.625	20191228	10	2019-12-28 20:00:03	4.1	37410.2	5.18	0.37	1.43
-34.5	150.625	20191228	11	2019-12-28 21:00:03	4.39	35741.7	5.2	0.36	1.43
-34.5	150.625	20191228	12	2019-12-28 22:00:03	5.08	34758.3	5.18	0.35	1.44
-34.5	150.625	20191228	13	2019-12-28 23:00:03	5.95	34490.1	4.95	0.35	1.43
-34.5	150.625	20191228	14	2019-12-29 00:00:03	6.6	34444.2	4.48	0.34	1.43
-34.5	150.625	20191228	15	2019-12-29 01:00:03	7.06	34711.9	4.24	0.34	1.42
-34.5	150.625	20191228	16	2019-12-29 02:00:03	7.63	35323.4	4.13	0.34	1.42
-34.5	150.625	20191228	17	2019-12-29 03:00:03	8.24	36203	4.02	0.35	1.41
-34.5	150.625	20191228	18	2019-12-29 04:00:03	8.95	37231	4.01	0.36	1.41
-34.5	150.625	20191228	19	2019-12-29 05:00:03	9.78	37872	4.01	0.36	1.41
-34.5	150.625	20191228	20	2019-12-29 06:00:03	10.51	37554.4	3.89	0.36	1.41
-34.5	150.625	20191228	21	2019-12-29 07:00:03	10.39	36231.5	3.74	0.34	1.41
-34.5	150.625	20191228	22	2019-12-29 08:00:03	9.81	34338.4	3.61	0.33	1.41
-34.5	150.625	20191228	23	2019-12-29 09:00:03	10.12	32862.5	3.63	0.32	1.41
-34.5	150.625	20191229	0	2019-12-29 10:00:03	12.36	35812.3	4.47	0.35	1.42
-34.5	150.625	20191229	1	2019-12-29 11:00:03	13.18	37728.4	4.85	0.37	1.43
-34.5	150.625	20191229	2	2019-12-29 12:00:03	13.96	43709.8	5.69	0.43	1.43
-34.5	150.625	20191229	3	2019-12-29 13:00:03	16.62	54678.4	7.08	0.54	1.43
-34.5	150.625	20191229	4	2019-12-29 14:00:03	17.48	61830.9	9.49	0.62	1.44
-34.5	150.625	20191229	5	2019-12-29 15:00:03	17.32	63350.3	11.94	0.65	1.45
-34.5	150.625	20191229	6	2019-12-29 16:00:03	17.8	62277.8	12.7	0.65	1.46
-34.5	150.625	20191229	7	2019-12-29 17:00:03	17.9	57912.3	10.48	0.6	1.45
-34.5	150.625	20191229	8	2019-12-29 18:00:03	17.57	52011.9	7.49	0.52	1.43
-34.5	150.625	20191229	9	2019-12-29 19:00:03	16.56	45231.2	5.85	0.44	1.42
-34.5	150.625	20191229	10	2019-12-29 20:00:03	13.78	39851	4.8	0.39	1.42
-34.5	150.625	20191229	11	2019-12-29 21:00:03	9.67	36169.9	4.25	0.35	1.42
-34.5	150.625	20191229	12	2019-12-29 22:00:03	7.12	33592.1	3.92	0.32	1.42
-34.5	150.625	20191229	13	2019-12-29 23:00:03	5.8	31521	3.58	0.3	1.42
-34.5	150.625	20191229	14	2019-12-30 00:00:03	4.86	29941.8	3.25	0.29	1.41
-34.5	150.625	20191229	15	2019-12-30 01:00:03	4.31	28674.7	2.96	0.27	1.41
-34.5	150.625	20191229	16	2019-12-30 02:00:03	4.04	27513.3	2.72	0.26	1.41
-34.5	150.625	20191229	17	2019-12-30 03:00:03	3.98	26679.5	2.57	0.25	1.41
-34.5	150.625	20191229	18	2019-12-30 04:00:03	3.97	26299.8	2.49	0.25	1.41
-34.5	150.625	20191229	19	2019-12-30 05:00:03	3.96	26413.1	2.46	0.25	1.41
-34.5	150.625	20191229	20	2019-12-30 06:00:03	3.91	26926.6	2.47	0.25	1.4
-34.5	150.625	20191229	21	2019-12-30 07:00:03	3.42	27754	2.54	0.26	1.4
-34.5	150.625	20191229	22	2019-12-30 08:00:03	2.86	28584	2.65	0.27	1.4
-34.5	150.625	20191229	23	2019-12-30 09:00:03	3.64	29525.4	2.8	0.28	1.4
-34.5	150.625	20191230	0	2019-12-30 10:00:03	5.74	25843.8	2.44	0.24	1.4
-34.5	150.625	20191230	1	2019-12-30 11:00:03	10.11	34889.2	3.12	0.33	1.4
-34.5	150.625	20191230	2	2019-12-30 12:00:03	13.27	47273	4.06	0.44	1.4
-34.5	150.625	20191230	3	2019-12-30 13:00:03	9.58	40388.6	3.45	0.38	1.4
-34.5	150.625	20191230	4	2019-12-30 14:00:03	10.93	49998.9	4.36	0.47	1.4
-34.5	150.625	20191230	5	2019-12-30 15:00:03	9.48	58879.8	5.28	0.55	1.4
-34.5	150.625	20191230	6	2019-12-30 16:00:03	7.43	64542.9	6.01	0.6	1.4
-34.5	150.625	20191230	7	2019-12-30 17:00:03	6.29	66540.3	6.47	0.63	1.41
-34.5	150.625	20191230	8	2019-12-30 18:00:03	5.31	65377.5	6.6	0.62	1.41
-34.5	150.625	20191230	9	2019-12-30 19:00:03	4.49	61442.4	6.5	0.59	1.41
-34.5	150.625	20191230	10	2019-12-30 20:00:03	4.03	54900.5	5.82	0.53	1.41
-34.5	150.625	20191230	11	2019-12-30 21:00:03	3.75	45989.2	4.72	0.44	1.41
-34.5	150.625	20191230	12	2019-12-30 22:00:03	4.05	36929	3.71	0.35	1.41
-34.5	150.625	20191230	13	2019-12-30 23:00:03	4.6	28703.5	2.87	0.27	1.41
-34.5	150.625	20191230	14	2019-12-31 00:00:03	4.74	21886.4	2.17	0.21	1.4
-34.5	150.625	20191230	15	2019-12-31 01:00:03	4.43	16656.2	1.62	0.16	1.4
-34.5	150.625	20191230	16	2019-12-31 02:00:03	3.99	12691.8	1.21	0.12	1.4
-34.5	150.625	20191230	17	2019-12-31 03:00:03	3.71	10072	0.96	0.09	1.4
-34.5	150.625	20191230	18	2019-12-31 04:00:03	3.67	8831.29	0.83	0.08	1.4
-34.5	150.625	20191230	19	2019-12-31 05:00:03	3.74	8551.79	0.8	0.08	1.4
-34.5	150.625	20191230	20	2019-12-31 06:00:03	3.41	8760.82	0.81	0.08	1.4
-34.5	150.625	20191230	21	2019-12-31 07:00:03	2.85	8767.56	0.79	0.08	1.4
-34.5	150.625	20191230	22	2019-12-31 08:00:03	2.11	8361.1	0.73	0.08	1.4
-34.5	150.625	20191230	23	2019-12-31 09:00:03	2.24	8338.97	0.7	0.08	1.4
-34.5	150.625	20191231	0	2019-12-31 10:00:03	3.72	10924.8	0.89	0.1	1.4
-34.5	150.625	20191231	1	2019-12-31 11:00:03	8.03	24440.8	1.96	0.23	1.4
-34.5	150.625	20191231	2	2019-12-31 12:00:03	12.13	41368.5	3.46	0.39	1.4
-34.5	150.625	20191231	3	2019-12-31 13:00:03	9.01	34097	3.91	0.33	1.42
-34.5	150.625	20191231	4	2019-12-31 14:00:03	12.09	45735.3	5.4	0.44	1.42
-34.5	150.625	20191231	5	2019-12-31 15:00:03	12.66	48939.8	5.52	0.47	1.42
-34.5	150.625	20191231	6	2019-12-31 16:00:03	2.29	20650.8	3.62	0.21	1.46
-34.5	150.625	20191231	7	2019-12-31 17:00:03	3.08	15428.6	2.03	0.15	1.43
-34.5	150.625	20191231	8	2019-12-31 18:00:03	3.87	13130.4	1.45	0.13	1.42
-34.5	150.625	20191231	9	2019-12-31 19:00:03	4.52	14356.1	1.66	0.14	1.41
-34.5	150.625	20191231	10	2019-12-31 20:00:03	4.43	14806	1.93	0.14	1.42
-34.5	150.625	20191231	11	2019-12-31 21:00:03	3.89	12678.5	1.87	0.13	1.43
-34.5	150.625	20191231	12	2019-12-31 22:00:03	2.5	9492.88	1.55	0.1	1.44
-34.5	150.625	20191231	13	2019-12-31 23:00:03	2.01	6989.01	1.41	0.07	1.46
-34.5	150.625	20191231	14	2020-01-01 00:00:03	1.69	5278.73	1.05	0.05	1.45
-34.5	150.625	20191231	15	2020-01-01 01:00:03	1.45	4272.76	0.79	0.04	1.43
-34.5	150.625	20191231	16	2020-01-01 02:00:03	1.31	3852.31	0.67	0.04	1.43
-34.5	150.625	20191231	17	2020-01-01 03:00:03	1.31	3737.26	0.63	0.04	1.43
-34.5	150.625	20191231	18	2020-01-01 04:00:03	1.41	3744.89	0.63	0.04	1.43
-34.5	150.625	20191231	19	2020-01-01 05:00:03	1.53	3743.13	0.62	0.04	1.43
-34.5	150.625	20191231	20	2020-01-01 06:00:03	1.57	3657.55	0.59	0.04	1.43
-34.5	150.625	20191231	21	2020-01-01 07:00:03	1.69	3606.37	0.55	0.04	1.43
-34.5	150.625	20191231	22	2020-01-01 08:00:03	2.06	3822.98	0.52	0.04	1.42
-34.5	150.625	20191231	23	2020-01-01 09:00:03	3.15	5459.31	0.63	0.05	1.41
