# Supplementary material for: Black Carbon Emission, Transport and Effect on Radiation Forcing Modelling During the Summer 2019–2020 Wildfires in Southeast Australia
Source: Preprints.org preprint supplement (doi:10.20944/preprints202302.0293.v1), 2023-02-17
Supplement: Supplementary file 15 [file merra_bc_201912_573.xlsx]

## Sheet: merra_bc_201912_573
lat	lon	date	time	date_time	bc	bccmass	totexttau	bcexttau	bcangstr	Observed PM₂ι₅		Date	MERRA-2 Predicted BC	Observed PM₂ι₅	MERRA-2 Predicted*10					Observed BC	WRF-chem Predicted
-33.5	150.625	20191201	0	2019-12-01 10:00:00	1.83	4365.16	0.4	0.04	1.4	5.4		2019-12-01	3.70643	24.1214	37.0643					0.477292	2.53749
-33.5	150.625	20191201	1	2019-12-01 11:00:00	5.04	12423.5	1.01	0.12	1.4	2.8		2019-12-02	1.1475	4.0875	11.475			RICHMOND BC7 1h average [ng/m³]	BC(ng/m3)	0.0400435	0.56525
-33.5	150.625	20191201	2	2019-12-01 12:00:00	8.64	21634.4	1.7	0.2	1.4	9		2019-12-03	2.60083	4.06667	26.0083			477.292	1520.12	0.052875	1.26831
-33.5	150.625	20191201	3	2019-12-01 13:00:00	5	12932.8	1.05	0.12	1.4	25.6		2019-12-04	10.5338	9.04583	105.338			40.0435	338.622	0.940167	0.829033
-33.5	150.625	20191201	4	2019-12-01 14:00:00	7.35	18789	1.54	0.17	1.4	47.8		2019-12-05	9.27125	30.7625	92.7125			52.875	759.804	1.42175	2.05374
-33.5	150.625	20191201	5	2019-12-01 15:00:00	7.36	19139.5	1.61	0.18	1.4	52.5		2019-12-06	9.38083	19.3208	93.8083			940.167	496.646	0.939542	0.953927
-33.5	150.625	20191201	6	2019-12-01 16:00:00	5.07	12253.8	1.05	0.11	1.4	41.9		2019-12-07	11.4629	86.3708	114.629			1421.75	1230.33	3.31933	4.84392
-33.5	150.625	20191201	7	2019-12-01 17:00:00	2.64	5192.27	0.47	0.05	1.41	26.6		2019-12-08	2.17917	24.8167	21.7917			939.542	571.465	1.05467	3.87492
-33.5	150.625	20191201	8	2019-12-01 18:00:00	2.1	3060.9	0.29	0.03	1.42	13.5		2019-12-09	8.79333	64.8	87.9333			3319.33	2901.83	2.93914	5.22776
-33.5	150.625	20191201	9	2019-12-01 19:00:00	2.19	2716.43	0.27	0.03	1.42	10.2		2019-12-10	8.57375	98.9625	85.7375			1054.67	2321.34	#DIV/0!	1.55094
-33.5	150.625	20191201	10	2019-12-01 20:00:00	1.55	1912.01	0.19	0.02	1.41	16.9		2019-12-11	2.03458	24.5458	20.3458			2939.14	3131.77	0.913	0.23902
-33.5	150.625	20191201	11	2019-12-01 21:00:00	1.09	1231.78	0.12	0.01	1.41	35.8		2019-12-12	1.94625	18.0375	19.4625			#DIV/0!	929.115	0.75275	0.0866717
-33.5	150.625	20191201	12	2019-12-01 22:00:00	1.02	1040.49	0.11	0.01	1.41	29.3		2019-12-13	1.83875	9.0375	18.3875			913	143.189	0.577292	0.017765
-33.5	150.625	20191201	13	2019-12-01 23:00:00	1.01	1040.22	0.13	0.01	1.43	20.4		2019-12-14	4.26833	39.3667	42.6833			752.75	51.9221	1.86475	0.482885
-33.5	150.625	20191201	14	2019-12-02 00:00:00	0.89	951.36	0.12	0.01	1.42	13.3		2019-12-15	18.9408	30.5083	189.408			577.292	10.6424	1.34192	1.66883
-33.5	150.625	20191201	15	2019-12-02 01:00:00	0.76	833.63	0.11	0.01	1.41	10		2019-12-16	3.35208	23.0625	33.5208			1864.75	289.28	0.846391	0.325153
-33.5	150.625	20191201	16	2019-12-02 02:00:00	0.66	733.37	0.11	0.01	1.44	5.1		2019-12-17	2.38042	8.05417	23.8042			1341.92	999.742	0.335917	0.243865
-33.5	150.625	20191201	17	2019-12-02 03:00:00	0.6	664.74	0.11	0.01	1.43	5.5		2019-12-18	17.1637	30.8375	171.637			846.391	194.788	1.13846	1.03898
-33.5	150.625	20191201	18	2019-12-02 04:00:00	0.54	666.84	0.11	0.01	1.43	3.5		2019-12-19	22.4308	46.8458	224.308			335.917	146.091	2.61946	3.13525
-33.5	150.625	20191201	19	2019-12-02 05:00:00	0.47	705.17	0.11	0.01	1.41	5.3		2019-12-20	4.85125	7.46667	48.5125			1138.46	622.42	0.617792	1.54071
-33.5	150.625	20191201	20	2019-12-02 06:00:00	0.36	672.22	0.1	0.01	1.41	4.9		2019-12-21	23.3837	49.6542	233.837			2619.46	1878.22	1.76017	2.93284
-33.5	150.625	20191201	21	2019-12-02 07:00:00	0.25	607.9	0.09	0.01	1.41	1.7		2019-12-22	6.64417	15.3625	66.4417			617.792	922.988	0.326125	1.56978
-33.5	150.625	20191201	22	2019-12-02 08:00:00	0.32	753.21	0.11	0.01	1.41	-1.1		2019-12-23	3.63917	14.0708	36.3917			1760.17	1756.97	0.465087	0.131353
-33.5	150.625	20191201	23	2019-12-02 09:00:00	0.88	1690.4	0.22	0.02	1.41	-0.7		2019-12-24	1.60042	10.1667	16.0042			326.125	940.402	0.601542	0.0441433
-33.5	150.625	20191202	0	2019-12-02 10:00:00	1.95	3667.86	0.43	0.03	1.41			2019-12-25	0.806667	13.1083	8.06667			465.087	78.6894	0.575958	0.00376833
-33.5	150.625	20191202	1	2019-12-02 11:00:00	2.74	5414.82	0.65	0.05	1.41	-1.3		2019-12-26	1.77375	10.7125	17.7375			601.542	26.4448	0.503458	0.0522183
-33.5	150.625	20191202	2	2019-12-02 12:00:00	2.96	6023.48	0.77	0.06	1.42	0.1		2019-12-27	1.59625	8.79583	15.9625			575.958	2.25748	0.486292	0.176035
-33.5	150.625	20191202	3	2019-12-02 13:00:00	3.74	7594.42	0.89	0.07	1.41			2019-12-28	2.76792	16.65	27.6792			503.458	31.2822	0.625083	1.04006
-33.5	150.625	20191202	4	2019-12-02 14:00:00	3.47	7114.7	0.72	0.07	1.41	-0.3		2019-12-29	8.00292	44.2708	80.0292			486.292	105.457	2.62513	2.94899
-33.5	150.625	20191202	5	2019-12-02 15:00:00	2.45	5281.19	0.51	0.05	1.41	1.6		2019-12-30	10.66	61.2667	106.6			625.083	623.065	2.60287	1.96438
-33.5	150.625	20191202	6	2019-12-02 16:00:00	1.26	2836.44	0.26	0.03	1.4	3.4		2019-12-31	7.77292	52.4375	77.7292			2625.12	1766.64	2.52033	1.49872
-33.5	150.625	20191202	7	2019-12-02 17:00:00	0.67	1574.11	0.15	0.01	1.4	6.7		2020-01-01	1.066	17.1545	10.66			2602.87	1176.79
-33.5	150.625	20191202	8	2019-12-02 18:00:00	0.52	1214.45	0.12	0.01	1.4	7.9								2520.33	897.833
-33.5	150.625	20191202	9	2019-12-02 19:00:00	0.47	1021.16	0.1	0.01	1.4	6.3
-33.5	150.625	20191202	10	2019-12-02 20:00:00	0.42	869.81	0.09	0.01	1.41	8
-33.5	150.625	20191202	11	2019-12-02 21:00:00	0.37	743.35	0.08	0.01	1.41	7.6
-33.5	150.625	20191202	12	2019-12-02 22:00:00	0.38	674.83	0.07	0.01	1.41	5.6
-33.5	150.625	20191202	13	2019-12-02 23:00:00	0.41	651.88	0.07	0.01	1.4	5
-33.5	150.625	20191202	14	2019-12-03 00:00:00	0.41	614.62	0.07	0.01	1.4	3
-33.5	150.625	20191202	15	2019-12-03 01:00:00	0.37	556.08	0.06	0.01	1.4	2.8
-33.5	150.625	20191202	16	2019-12-03 02:00:00	0.32	509.79	0.05	0	1.4	2.7
-33.5	150.625	20191202	17	2019-12-03 03:00:00	0.3	503.9	0.05	0	1.4	4.7
-33.5	150.625	20191202	18	2019-12-03 04:00:00	0.31	528.51	0.05	0	1.4	3
-33.5	150.625	20191202	19	2019-12-03 05:00:00	0.33	565.09	0.05	0.01	1.4	4.7
-33.5	150.625	20191202	20	2019-12-03 06:00:00	0.3	585.05	0.05	0.01	1.4	5.5
-33.5	150.625	20191202	21	2019-12-03 07:00:00	0.24	599.1	0.05	0.01	1.4	2.7
-33.5	150.625	20191202	22	2019-12-03 08:00:00	0.27	702.98	0.05	0.01	1.4
-33.5	150.625	20191202	23	2019-12-03 09:00:00	0.58	1168.6	0.09	0.01	1.4
-33.5	150.625	20191203	0	2019-12-03 10:00:00	2.27	3846.45	0.33	0.04	1.4
-33.5	150.625	20191203	1	2019-12-03 11:00:00	6.23	10856.1	0.91	0.1	1.4	-1.9
-33.5	150.625	20191203	2	2019-12-03 12:00:00	10.06	18463.4	1.52	0.17	1.4	-0.1
-33.5	150.625	20191203	3	2019-12-03 13:00:00	5.33	10681.9	0.89	0.1	1.4	9.8
-33.5	150.625	20191203	4	2019-12-03 14:00:00	8.09	16408.4	1.34	0.15	1.4	5.3
-33.5	150.625	20191203	5	2019-12-03 15:00:00	8.36	16839.9	1.36	0.16	1.4	6.3
-33.5	150.625	20191203	6	2019-12-03 16:00:00	6.69	12986.7	1.04	0.12	1.4	5.3
-33.5	150.625	20191203	7	2019-12-03 17:00:00	4.17	7677.62	0.62	0.07	1.4	1.7
-33.5	150.625	20191203	8	2019-12-03 18:00:00	2.27	3598.88	0.3	0.03	1.4	5.4
-33.5	150.625	20191203	9	2019-12-03 19:00:00	1.39	1989.71	0.19	0.02	1.4	5.5
-33.5	150.625	20191203	10	2019-12-03 20:00:00	1.13	1714.82	0.17	0.02	1.4	9.1
-33.5	150.625	20191203	11	2019-12-03 21:00:00	1.02	1551.74	0.15	0.01	1.4	5.7
-33.5	150.625	20191203	12	2019-12-03 22:00:00	0.98	1391.98	0.13	0.01	1.4	10.2
-33.5	150.625	20191203	13	2019-12-03 23:00:00	1	1274.56	0.12	0.01	1.4	6.2
-33.5	150.625	20191203	14	2019-12-04 00:00:00	0.9	1105.58	0.1	0.01	1.4	7.1
-33.5	150.625	20191203	15	2019-12-04 01:00:00	0.74	925.29	0.08	0.01	1.4	5.6
-33.5	150.625	20191203	16	2019-12-04 02:00:00	0.64	818.7	0.07	0.01	1.4	7.8
-33.5	150.625	20191203	17	2019-12-04 03:00:00	0.65	807	0.07	0.01	1.4	9.8
-33.5	150.625	20191203	18	2019-12-04 04:00:00	0.83	832.56	0.07	0.01	1.4	5.3
-33.5	150.625	20191203	19	2019-12-04 05:00:00	1.26	865.24	0.08	0.01	1.4	3.5
-33.5	150.625	20191203	20	2019-12-04 06:00:00	1.13	887.88	0.08	0.01	1.4	0.9
-33.5	150.625	20191203	21	2019-12-04 07:00:00	0.56	891.31	0.08	0.01	1.4
-33.5	150.625	20191203	22	2019-12-04 08:00:00	0.47	1012.91	0.08	0.01	1.4
-33.5	150.625	20191203	23	2019-12-04 09:00:00	0.91	1876.49	0.16	0.02	1.4
-33.5	150.625	20191204	0	2019-12-04 10:00:00	3.53	7303.48	0.6	0.07	1.4	-2.4
-33.5	150.625	20191204	1	2019-12-04 11:00:00	10.22	22111.4	1.8	0.21	1.4	0.3
-33.5	150.625	20191204	2	2019-12-04 12:00:00	17.6	39179.8	3.17	0.36	1.4	-0.8
-33.5	150.625	20191204	3	2019-12-04 13:00:00	6.98	16559.8	1.36	0.15	1.4
-33.5	150.625	20191204	4	2019-12-04 14:00:00	13.76	32637.7	2.64	0.3	1.4
-33.5	150.625	20191204	5	2019-12-04 15:00:00	18.66	40789.2	3.28	0.38	1.4	-2.5
-33.5	150.625	20191204	6	2019-12-04 16:00:00	32.35	50085	4	0.47	1.4	3
-33.5	150.625	20191204	7	2019-12-04 17:00:00	34.36	41320.4	3.3	0.38	1.4	6.7
-33.5	150.625	20191204	8	2019-12-04 18:00:00	26.43	29689.8	2.38	0.28	1.4	8.1
-33.5	150.625	20191204	9	2019-12-04 19:00:00	19.96	19528.3	1.57	0.18	1.4	35.1
-33.5	150.625	20191204	10	2019-12-04 20:00:00	16.34	13405.7	1.09	0.12	1.4
-33.5	150.625	20191204	11	2019-12-04 21:00:00	14.44	9650.8	0.78	0.09	1.4
-33.5	150.625	20191204	12	2019-12-04 22:00:00	14.46	7118.97	0.57	0.07	1.4	81
-33.5	150.625	20191204	13	2019-12-04 23:00:00	15.63	5303.1	0.42	0.05	1.4	48.6
-33.5	150.625	20191204	14	2019-12-05 00:00:00	14.81	3940.57	0.32	0.04	1.4	41
-33.5	150.625	20191204	15	2019-12-05 01:00:00	12.79	2973.28	0.24	0.03	1.4	31.6
-33.5	150.625	20191204	16	2019-12-05 02:00:00	11.1	2417.12	0.2	0.02	1.4	33.6
-33.5	150.625	20191204	17	2019-12-05 03:00:00	10.12	2154.59	0.18	0.02	1.4	40
-33.5	150.625	20191204	18	2019-12-05 04:00:00	9.33	2003.21	0.17	0.02	1.4	47.6
-33.5	150.625	20191204	19	2019-12-05 05:00:00	8.64	1914.22	0.17	0.02	1.4	55.4
-33.5	150.625	20191204	20	2019-12-05 06:00:00	7.41	1798.67	0.16	0.02	1.41	52.3
-33.5	150.625	20191204	21	2019-12-05 07:00:00	3.51	1655.77	0.14	0.02	1.4
-33.5	150.625	20191204	22	2019-12-05 08:00:00	1.82	1852.21	0.16	0.02	1.4	55.7
-33.5	150.625	20191204	23	2019-12-05 09:00:00	2.46	3684.55	0.32	0.03	1.4	128.3
-33.5	150.625	20191205	0	2019-12-05 10:00:00	8.57	17530.1	1.47	0.16	1.4	96.2
-33.5	150.625	20191205	1	2019-12-05 11:00:00	17.89	40194.3	3.34	0.37	1.4	26
-33.5	150.625	20191205	2	2019-12-05 12:00:00	23.99	57122.2	4.67	0.53	1.4	3.6
-33.5	150.625	20191205	3	2019-12-05 13:00:00	15.59	41816.6	3.38	0.39	1.4	-1
-33.5	150.625	20191205	4	2019-12-05 14:00:00	21.19	53871.9	4.27	0.5	1.4
-33.5	150.625	20191205	5	2019-12-05 15:00:00	18.26	42202.5	3.31	0.39	1.4	-2.5
-33.5	150.625	20191205	6	2019-12-05 16:00:00	11.19	22309.5	1.74	0.21	1.4	4.4
-33.5	150.625	20191205	7	2019-12-05 17:00:00	5.14	9649.53	0.76	0.09	1.4	6.5
-33.5	150.625	20191205	8	2019-12-05 18:00:00	2.57	5015.44	0.41	0.05	1.41	6.4
-33.5	150.625	20191205	9	2019-12-05 19:00:00	1.87	3965.56	0.33	0.04	1.41	14.2
-33.5	150.625	20191205	10	2019-12-05 20:00:00	1.8	3361.03	0.29	0.03	1.42	21.7
-33.5	150.625	20191205	11	2019-12-05 21:00:00	1.98	2687.14	0.23	0.03	1.42	25.7
-33.5	150.625	20191205	12	2019-12-05 22:00:00	2.92	2530.68	0.22	0.02	1.42	28.2
-33.5	150.625	20191205	13	2019-12-05 23:00:00	7.56	2742.65	0.24	0.03	1.42	23.4
-33.5	150.625	20191205	14	2019-12-06 00:00:00	9.55	2759.02	0.25	0.03	1.42	15.4
-33.5	150.625	20191205	15	2019-12-06 01:00:00	10	2605.56	0.25	0.03	1.44	16.9
-33.5	150.625	20191205	16	2019-12-06 02:00:00	10.68	2503.54	0.25	0.02	1.44
-33.5	150.625	20191205	17	2019-12-06 03:00:00	12.15	2580.67	0.25	0.03	1.43	-2
-33.5	150.625	20191205	18	2019-12-06 04:00:00	13.54	2639.35	0.25	0.03	1.42	17.4
-33.5	150.625	20191205	19	2019-12-06 05:00:00	14.14	2644.17	0.24	0.03	1.42	21.9
-33.5	150.625	20191205	20	2019-12-06 06:00:00	11.45	2551.29	0.23	0.02	1.42	26.2
-33.5	150.625	20191205	21	2019-12-06 07:00:00	5.09	2523.94	0.24	0.02	1.43	18.2
-33.5	150.625	20191205	22	2019-12-06 08:00:00	2.72	3110.9	0.3	0.03	1.43	15.7
-33.5	150.625	20191205	23	2019-12-06 09:00:00	3.52	6183.18	0.57	0.06	1.42	23.8
-33.5	150.625	20191206	0	2019-12-06 10:00:00	5.17	10283.3	0.93	0.1	1.42	79.2
-33.5	150.625	20191206	1	2019-12-06 11:00:00	8.59	17426.8	1.51	0.16	1.41	75.7
-33.5	150.625	20191206	2	2019-12-06 12:00:00	13.16	25353.9	2.11	0.24	1.41	28.8
-33.5	150.625	20191206	3	2019-12-06 13:00:00	15.3	27799	2.25	0.26	1.41	14.4
-33.5	150.625	20191206	4	2019-12-06 14:00:00	20.76	32019.4	2.51	0.3	1.41	6.9
-33.5	150.625	20191206	5	2019-12-06 15:00:00	19.97	31799	2.43	0.3	1.4	1.1
-33.5	150.625	20191206	6	2019-12-06 16:00:00	2.52	5378.36	0.43	0.05	1.4	0.2
-33.5	150.625	20191206	7	2019-12-06 17:00:00	3.13	6884.96	0.54	0.06	1.4	4.8
-33.5	150.625	20191206	8	2019-12-06 18:00:00	3.49	7452.39	0.58	0.07	1.4	3.3
-33.5	150.625	20191206	9	2019-12-06 19:00:00	4.18	7065.82	0.56	0.07	1.4	6.9
-33.5	150.625	20191206	10	2019-12-06 20:00:00	5.58	5928.12	0.47	0.06	1.4
-33.5	150.625	20191206	11	2019-12-06 21:00:00	7.99	4992.77	0.4	0.05	1.4	30.5
-33.5	150.625	20191206	12	2019-12-06 22:00:00	10.38	4587.98	0.38	0.04	1.4	36.6
-33.5	150.625	20191206	13	2019-12-06 23:00:00	12.08	4420.59	0.39	0.04	1.4	21.8
-33.5	150.625	20191206	14	2019-12-07 00:00:00	12.51	4242.32	0.4	0.04	1.4	23.1
-33.5	150.625	20191206	15	2019-12-07 01:00:00	12.67	4073.88	0.39	0.04	1.4	21.3
-33.5	150.625	20191206	16	2019-12-07 02:00:00	13.14	3990.34	0.38	0.04	1.4	19.6
-33.5	150.625	20191206	17	2019-12-07 03:00:00	13.91	3997.65	0.38	0.04	1.4	14.3
-33.5	150.625	20191206	18	2019-12-07 04:00:00	14.48	4031.08	0.38	0.04	1.41	17
-33.5	150.625	20191206	19	2019-12-07 05:00:00	14.57	4066.49	0.37	0.04	1.41	24.8
-33.5	150.625	20191206	20	2019-12-07 06:00:00	13.9	4042.58	0.37	0.04	1.41	23.1
-33.5	150.625	20191206	21	2019-12-07 07:00:00	8.39	3890.51	0.35	0.04	1.4	10.6
-33.5	150.625	20191206	22	2019-12-07 08:00:00	3.61	4072.7	0.36	0.04	1.4	2.6
-33.5	150.625	20191206	23	2019-12-07 09:00:00	3.26	5593.03	0.47	0.05	1.4	37.4
-33.5	150.625	20191207	0	2019-12-07 10:00:00	5.26	11626.1	0.94	0.11	1.4	96.1
-33.5	150.625	20191207	1	2019-12-07 11:00:00	8.33	19634.3	1.58	0.18	1.4	154.6
-33.5	150.625	20191207	2	2019-12-07 12:00:00	12.03	31049	2.48	0.29	1.4	245.2
-33.5	150.625	20191207	3	2019-12-07 13:00:00	11.02	32631.4	2.64	0.3	1.4	265.5
-33.5	150.625	20191207	4	2019-12-07 14:00:00	14.05	43313.1	3.5	0.4	1.4	311.5
-33.5	150.625	20191207	5	2019-12-07 15:00:00	17.76	46382.1	3.76	0.43	1.4	328.1
-33.5	150.625	20191207	6	2019-12-07 16:00:00	22.25	42688.4	3.51	0.4	1.4	215.8
-33.5	150.625	20191207	7	2019-12-07 17:00:00	22.38	34417.7	2.88	0.32	1.4	96.4
-33.5	150.625	20191207	8	2019-12-07 18:00:00	18.85	24142.9	2.07	0.22	1.4	57.7
-33.5	150.625	20191207	9	2019-12-07 19:00:00	12.68	15770.2	1.39	0.15	1.4	38.7
-33.5	150.625	20191207	10	2019-12-07 20:00:00	6.94	10338.6	0.97	0.1	1.4	31.2
-33.5	150.625	20191207	11	2019-12-07 21:00:00	4.88	7051.59	0.72	0.07	1.41
-33.5	150.625	20191207	12	2019-12-07 22:00:00	4.3	5009.99	0.58	0.05	1.41	19.3
-33.5	150.625	20191207	13	2019-12-07 23:00:00	3.94	3714.14	0.51	0.04	1.43	19
-33.5	150.625	20191207	14	2019-12-08 00:00:00	3.23	2832.36	0.42	0.03	1.43	8.6
-33.5	150.625	20191207	15	2019-12-08 01:00:00	2.56	2254.78	0.42	0.02	1.44	6
-33.5	150.625	20191207	16	2019-12-08 02:00:00	2.13	1873.46	0.38	0.02	1.45	5.1
-33.5	150.625	20191207	17	2019-12-08 03:00:00	2.1	1681.4	0.34	0.02	1.45	10.1
-33.5	150.625	20191207	18	2019-12-08 04:00:00	2.21	1608.3	0.35	0.02	1.45	12.9
-33.5	150.625	20191207	19	2019-12-08 05:00:00	2.11	1567.48	0.34	0.02	1.45	17.7
-33.5	150.625	20191207	20	2019-12-08 06:00:00	1.25	1538.94	0.32	0.02	1.45	20.5
-33.5	150.625	20191207	21	2019-12-08 07:00:00	0.92	1565.53	0.31	0.02	1.45	17.4
-33.5	150.625	20191207	22	2019-12-08 08:00:00	1.03	1806.48	0.29	0.02	1.43	9.5
-33.5	150.625	20191207	23	2019-12-08 09:00:00	1.59	2834.91	0.36	0.03	1.42	10.7
-33.5	150.625	20191208	0	2019-12-08 10:00:00	1.04	17449.9	1.56	0.16	1.4	20.8
-33.5	150.625	20191208	1	2019-12-08 11:00:00	2.58	19947	1.83	0.19	1.4	48.4
-33.5	150.625	20191208	2	2019-12-08 12:00:00	4.12	22421.8	2.12	0.21	1.4	78.2
-33.5	150.625	20191208	3	2019-12-08 13:00:00	2.57	11948.6	1.18	0.11	1.41	80.4
-33.5	150.625	20191208	4	2019-12-08 14:00:00	3.64	14202.7	1.39	0.13	1.41	67.7
-33.5	150.625	20191208	5	2019-12-08 15:00:00	3.76	14564.4	1.42	0.14	1.4	48.4
-33.5	150.625	20191208	6	2019-12-08 16:00:00	3.29	13641.4	1.34	0.13	1.4	35.3
-33.5	150.625	20191208	7	2019-12-08 17:00:00	2.72	12718.6	1.26	0.12	1.4	27.2
-33.5	150.625	20191208	8	2019-12-08 18:00:00	2.18	11917.9	1.2	0.11	1.41	13.8
-33.5	150.625	20191208	9	2019-12-08 19:00:00	1.79	11293.5	1.17	0.11	1.41	11.6
-33.5	150.625	20191208	10	2019-12-08 20:00:00	1.52	10800	1.16	0.1	1.41	3.8
-33.5	150.625	20191208	11	2019-12-08 21:00:00	1.29	10376.6	1.11	0.1	1.41	15.8
-33.5	150.625	20191208	12	2019-12-08 22:00:00	1.26	10175.8	1.06	0.1	1.41	15
-33.5	150.625	20191208	13	2019-12-08 23:00:00	1.41	10060.4	1.03	0.09	1.41	10.7
-33.5	150.625	20191208	14	2019-12-09 00:00:00	1.63	9878.68	1	0.09	1.41	9
-33.5	150.625	20191208	15	2019-12-09 01:00:00	1.8	9641.86	0.99	0.09	1.41	6.9
-33.5	150.625	20191208	16	2019-12-09 02:00:00	1.94	9387.48	0.98	0.09	1.41	10.2
-33.5	150.625	20191208	17	2019-12-09 03:00:00	2.08	9185.52	0.96	0.09	1.41	8.6
-33.5	150.625	20191208	18	2019-12-09 04:00:00	2.19	9003.98	0.95	0.09	1.41	8.3
-33.5	150.625	20191208	19	2019-12-09 05:00:00	2.26	8737.51	0.93	0.08	1.41	9.8
-33.5	150.625	20191208	20	2019-12-09 06:00:00	1.64	8284.33	0.87	0.08	1.41	11.7
-33.5	150.625	20191208	21	2019-12-09 07:00:00	1.06	7630.12	0.79	0.07	1.41	13.7
-33.5	150.625	20191208	22	2019-12-09 08:00:00	1.31	6866.49	0.69	0.07	1.41	11.9
-33.5	150.625	20191208	23	2019-12-09 09:00:00	1.94	6325.63	0.61	0.06	1.41	64.4
-33.5	150.625	20191209	0	2019-12-09 10:00:00	6.52	13723.6	1.25	0.13	1.4	107.5
-33.5	150.625	20191209	1	2019-12-09 11:00:00	14.23	26573.2	2.39	0.25	1.4	124.5
-33.5	150.625	20191209	2	2019-12-09 12:00:00	21.98	44248.1	3.9	0.41	1.4	141.7
-33.5	150.625	20191209	3	2019-12-09 13:00:00	10.2	29733.7	2.46	0.28	1.4	158.9
-33.5	150.625	20191209	4	2019-12-09 14:00:00	17.46	50188.7	4.24	0.47	1.4	196.5
-33.5	150.625	20191209	5	2019-12-09 15:00:00	21.33	61708.8	5.22	0.57	1.4	261.6
-33.5	150.625	20191209	6	2019-12-09 16:00:00	19.29	62825.6	5.32	0.58	1.4	168.7
-33.5	150.625	20191209	7	2019-12-09 17:00:00	16.43	57534.6	4.88	0.53	1.4	73.7
-33.5	150.625	20191209	8	2019-12-09 18:00:00	14.5	47477.2	4.03	0.44	1.4	33.8
-33.5	150.625	20191209	9	2019-12-09 19:00:01	12.54	36554.1	3.1	0.34	1.4	29.9
-33.5	150.625	20191209	10	2019-12-09 20:00:01	10.81	28239.3	2.41	0.26	1.4	29.6
-33.5	150.625	20191209	11	2019-12-09 21:00:01	9.48	22869.5	1.98	0.21	1.4	28.6
-33.5	150.625	20191209	12	2019-12-09 22:00:01	9.05	19583.1	1.71	0.18	1.4	25.1
-33.5	150.625	20191209	13	2019-12-09 23:00:01	9.37	17400.1	1.53	0.16	1.4	20.6
-33.5	150.625	20191209	14	2019-12-10 00:00:01	9.85	15723.3	1.39	0.15	1.4	14.1
-33.5	150.625	20191209	15	2019-12-10 01:00:01	11.27	14449.3	1.27	0.14	1.4	11.4
-33.5	150.625	20191209	16	2019-12-10 02:00:01	13.51	13281.6	1.13	0.12	1.4	14.2
-33.5	150.625	20191209	17	2019-12-10 03:00:01	15.34	11878.4	0.97	0.11	1.4	12.9
-33.5	150.625	20191209	18	2019-12-10 04:00:01	15.69	10213.3	0.81	0.09	1.4	13.4
-33.5	150.625	20191209	19	2019-12-10 05:00:01	14.28	8505.13	0.66	0.08	1.4	18.5
-33.5	150.625	20191209	20	2019-12-10 06:00:01	11.67	6984.78	0.53	0.07	1.4	21.1
-33.5	150.625	20191209	21	2019-12-10 07:00:01	9.13	5871.43	0.43	0.05	1.4	15.1
-33.5	150.625	20191209	22	2019-12-10 08:00:01	6.87	5491.46	0.4	0.05	1.4	10.7
-33.5	150.625	20191209	23	2019-12-10 09:00:01	4.26	6916.82	0.52	0.06	1.4	41.8
-33.5	150.625	20191210	0	2019-12-10 10:00:01	4.21	14362.2	1.12	0.13	1.4	193.1
-33.5	150.625	20191210	1	2019-12-10 11:00:01	7.67	23769.5	1.84	0.22	1.4	361.2
-33.5	150.625	20191210	2	2019-12-10 12:00:01	10.05	34602.6	2.71	0.32	1.4	491.3
-33.5	150.625	20191210	3	2019-12-10 13:00:01	13.74	45930.3	3.65	0.43	1.4	513
-33.5	150.625	20191210	4	2019-12-10 14:00:01	14.57	50581.1	4.64	0.48	1.41	371.9
-33.5	150.625	20191210	5	2019-12-10 15:00:01	11.76	46480	5.51	0.45	1.42
-33.5	150.625	20191210	6	2019-12-10 16:00:01	8.49	36653.2	4.89	0.36	1.43
-33.5	150.625	20191210	7	2019-12-10 17:00:01	6.42	26377.6	3.42	0.26	1.43	98.5
-33.5	150.625	20191210	8	2019-12-10 18:00:01	4.35	17185.7	2.31	0.17	1.43	62.3
-33.5	150.625	20191210	9	2019-12-10 19:00:01	3.47	10777	1.49	0.11	1.44	37.8
-33.5	150.625	20191210	10	2019-12-10 20:00:01	3.06	6746.42	0.92	0.07	1.43	24.4
-33.5	150.625	20191210	11	2019-12-10 21:00:01	2.58	4160.14	0.59	0.04	1.43	17.5
-33.5	150.625	20191210	12	2019-12-10 22:00:01	1.99	2758.11	0.5	0.03	1.45	17.5
-33.5	150.625	20191210	13	2019-12-10 23:00:01	1.54	2262.39	0.49	0.02	1.46	13.4
-33.5	150.625	20191210	14	2019-12-11 00:00:01	1.15	1929.73	0.43	0.02	1.46	16.3
-33.5	150.625	20191210	15	2019-12-11 01:00:01	0.94	1671.51	0.41	0.02	1.46	17.5
-33.5	150.625	20191210	16	2019-12-11 02:00:01	0.88	1499.64	0.4	0.02	1.46	13.5
-33.5	150.625	20191210	17	2019-12-11 03:00:01	0.9	1396.61	0.38	0.01	1.47	15.8
-33.5	150.625	20191210	18	2019-12-11 04:00:01	0.93	1299.62	0.38	0.01	1.45	8.9
-33.5	150.625	20191210	19	2019-12-11 05:00:01	0.95	1243.76	0.35	0.01	1.44	9
-33.5	150.625	20191210	20	2019-12-11 06:00:01	0.88	1203.58	0.3	0.01	1.43	6.6
-33.5	150.625	20191210	21	2019-12-11 07:00:01	0.86	1226.62	0.26	0.01	1.42	13.4
-33.5	150.625	20191210	22	2019-12-11 08:00:01	1.08	1504.35	0.26	0.01	1.41	56.7
-33.5	150.625	20191210	23	2019-12-11 09:00:01	1.97	2798.33	0.37	0.03	1.4	82
-33.5	150.625	20191211	0	2019-12-11 10:00:01	3.21	7666.32	0.81	0.07	1.4	69.2
-33.5	150.625	20191211	1	2019-12-11 11:00:01	4.66	12524.1	1.23	0.12	1.4	42.2
-33.5	150.625	20191211	2	2019-12-11 12:00:01	5.94	17290.2	1.66	0.16	1.4	25.9
-33.5	150.625	20191211	3	2019-12-11 13:00:01	3.21	13519.3	1.3	0.13	1.4	24.2
-33.5	150.625	20191211	4	2019-12-11 14:00:01	3.98	18579	1.79	0.17	1.4	29.2
-33.5	150.625	20191211	5	2019-12-11 15:00:01	3.64	18543	1.8	0.17	1.4	38.8
-33.5	150.625	20191211	6	2019-12-11 16:00:01	3.25	16665.6	1.6	0.16	1.4	28.2
-33.5	150.625	20191211	7	2019-12-11 17:00:01	2.45	11595.5	1.2	0.11	1.41	22.6
-33.5	150.625	20191211	8	2019-12-11 18:00:01	1.96	8067.98	0.93	0.08	1.41	18.2
-33.5	150.625	20191211	9	2019-12-11 19:00:01	1.63	5764.32	0.73	0.06	1.41	14.8
-33.5	150.625	20191211	10	2019-12-11 20:00:01	1.39	4333.62	0.63	0.04	1.42	13.7
-33.5	150.625	20191211	11	2019-12-11 21:00:01	1.13	3385.48	0.53	0.03	1.42	9.4
-33.5	150.625	20191211	12	2019-12-11 22:00:01	0.95	2742.21	0.49	0.03	1.43	6.9
-33.5	150.625	20191211	13	2019-12-11 23:00:01	0.89	2335.64	0.46	0.02	1.43	6.1
-33.5	150.625	20191211	14	2019-12-12 00:00:01	0.91	2081.5	0.43	0.02	1.44	9.2
-33.5	150.625	20191211	15	2019-12-12 01:00:01	0.94	1919.1	0.43	0.02	1.44	5.7
-33.5	150.625	20191211	16	2019-12-12 02:00:01	0.99	1812.85	0.43	0.02	1.44	8.4
-33.5	150.625	20191211	17	2019-12-12 03:00:01	1.12	1744.54	0.4	0.02	1.44	7.8
-33.5	150.625	20191211	18	2019-12-12 04:00:01	1.19	1704.66	0.43	0.02	1.45	11.2
-33.5	150.625	20191211	19	2019-12-12 05:00:01	1.03	1679.08	0.43	0.02	1.46	18.9
-33.5	150.625	20191211	20	2019-12-12 06:00:01	0.71	1640.29	0.38	0.02	1.44	15.6
-33.5	150.625	20191211	21	2019-12-12 07:00:01	0.72	1583.64	0.32	0.02	1.43	18.9
-33.5	150.625	20191211	22	2019-12-12 08:00:01	0.77	1640.82	0.28	0.02	1.42	17.7
-33.5	150.625	20191211	23	2019-12-12 09:00:01	1.01	2151.67	0.33	0.02	1.42	12
-33.5	150.625	20191212	0	2019-12-12 10:00:01	1.77	5273.21	0.61	0.05	1.41	17
-33.5	150.625	20191212	1	2019-12-12 11:00:01	3	8947.84	0.95	0.08	1.41	23.6
-33.5	150.625	20191212	2	2019-12-12 12:00:01	4.23	13577.8	1.43	0.13	1.41	28.6
-33.5	150.625	20191212	3	2019-12-12 13:00:01	4.73	16948	1.77	0.16	1.41
-33.5	150.625	20191212	4	2019-12-12 14:00:01	5.34	21537.1	2.23	0.2	1.41	55
-33.5	150.625	20191212	5	2019-12-12 15:00:01	4.62	21261.2	2.19	0.2	1.4	32.8
-33.5	150.625	20191212	6	2019-12-12 16:00:01	3.54	17835.5	1.89	0.17	1.41	26.7
-33.5	150.625	20191212	7	2019-12-12 17:00:01	2.66	13797.2	1.59	0.13	1.41	22.8
-33.5	150.625	20191212	8	2019-12-12 18:00:01	1.89	9951	1.25	0.1	1.42	21.4
-33.5	150.625	20191212	9	2019-12-12 19:00:01	1.37	6905.27	0.98	0.07	1.43	13.6
-33.5	150.625	20191212	10	2019-12-12 20:00:01	1.15	5079.33	0.79	0.05	1.43	12.8
-33.5	150.625	20191212	11	2019-12-12 21:00:01	1.03	4079.89	0.69	0.04	1.44	19.3
-33.5	150.625	20191212	12	2019-12-12 22:00:01	1	3484.24	0.64	0.04	1.44	22
-33.5	150.625	20191212	13	2019-12-12 23:00:01	0.99	3064.46	0.58	0.03	1.44	11.9
-33.5	150.625	20191212	14	2019-12-13 00:00:01	0.98	2716.9	0.5	0.03	1.44	6.8
-33.5	150.625	20191212	15	2019-12-13 01:00:01	0.92	2436.35	0.45	0.02	1.44	3.6
-33.5	150.625	20191212	16	2019-12-13 02:00:01	0.9	2230.66	0.42	0.02	1.44	8.1
-33.5	150.625	20191212	17	2019-12-13 03:00:01	0.94	2090.06	0.38	0.02	1.44	10.9
-33.5	150.625	20191212	18	2019-12-13 04:00:01	1	1950.19	0.37	0.02	1.44	11.2
-33.5	150.625	20191212	19	2019-12-13 05:00:01	1.1	1819.58	0.33	0.02	1.44	20.9
-33.5	150.625	20191212	20	2019-12-13 06:00:01	0.73	1718.97	0.31	0.02	1.45	20.1
-33.5	150.625	20191212	21	2019-12-13 07:00:01	0.55	1654.38	0.34	0.02	1.47	13
-33.5	150.625	20191212	22	2019-12-13 08:00:01	0.7	1699.88	0.34	0.02	1.46	15.6
-33.5	150.625	20191212	23	2019-12-13 09:00:01	0.97	2058.94	0.37	0.02	1.45	12
-33.5	150.625	20191213	0	2019-12-13 10:00:01	1.81	4188.08	0.65	0.04	1.44	8.3
-33.5	150.625	20191213	1	2019-12-13 11:00:01	2.76	7007.8	1.02	0.07	1.44	13.7
-33.5	150.625	20191213	2	2019-12-13 12:00:01	3.76	10782.9	1.44	0.11	1.43
-33.5	150.625	20191213	3	2019-12-13 13:00:01	4.53	15117.2	1.85	0.15	1.42
-33.5	150.625	20191213	4	2019-12-13 14:00:01	4.67	18480.9	2.11	0.18	1.41
-33.5	150.625	20191213	5	2019-12-13 15:00:01	4.2	19418.4	2.16	0.18	1.41
-33.5	150.625	20191213	6	2019-12-13 16:00:01	3.36	18214.1	2	0.17	1.41
-33.5	150.625	20191213	7	2019-12-13 17:00:01	2.5	15957.8	1.8	0.15	1.41	-2.2
-33.5	150.625	20191213	8	2019-12-13 18:00:01	1.76	13204.6	1.58	0.13	1.41	9.2
-33.5	150.625	20191213	9	2019-12-13 19:00:01	1.31	10275.9	1.32	0.1	1.42	5.3
-33.5	150.625	20191213	10	2019-12-13 20:00:01	1.1	7725.43	1.07	0.08	1.42	13.7
-33.5	150.625	20191213	11	2019-12-13 21:00:01	1.05	5608.23	0.85	0.06	1.43	18.6
-33.5	150.625	20191213	12	2019-12-13 22:00:01	1.17	4081.53	0.69	0.04	1.44	19.9
-33.5	150.625	20191213	13	2019-12-13 23:00:01	1.36	3082.44	0.56	0.03	1.45	8.2
-33.5	150.625	20191213	14	2019-12-14 00:00:01	1.48	2376.88	0.43	0.02	1.45	4.7
-33.5	150.625	20191213	15	2019-12-14 01:00:01	1.59	1964.46	0.36	0.02	1.44	4.8
-33.5	150.625	20191213	16	2019-12-14 02:00:01	1.78	1807.59	0.34	0.02	1.44	8.8
-33.5	150.625	20191213	17	2019-12-14 03:00:01	2.12	1786.42	0.33	0.02	1.44	4.6
-33.5	150.625	20191213	18	2019-12-14 04:00:01	2.67	1806.14	0.33	0.02	1.44	5.8
-33.5	150.625	20191213	19	2019-12-14 05:00:01	3.33	1847.4	0.32	0.02	1.44
-33.5	150.625	20191213	20	2019-12-14 06:00:01	2.52	1871.79	0.3	0.02	1.43	3
-33.5	150.625	20191213	21	2019-12-14 07:00:01	1.56	1862.42	0.27	0.02	1.42	4.1
-33.5	150.625	20191213	22	2019-12-14 08:00:01	1.26	1912.05	0.26	0.02	1.42	6.4
-33.5	150.625	20191213	23	2019-12-14 09:00:01	1.2	2189.6	0.27	0.02	1.42	37
-33.5	150.625	20191214	0	2019-12-14 10:00:01	3.18	7356.2	0.73	0.07	1.41	113.7
-33.5	150.625	20191214	1	2019-12-14 11:00:01	6.5	16190.9	1.5	0.15	1.4	150.2
-33.5	150.625	20191214	2	2019-12-14 12:00:01	10.24	27694.4	2.49	0.26	1.4	132.8
-33.5	150.625	20191214	3	2019-12-14 13:00:01	5.14	15363.7	1.39	0.14	1.4	112
-33.5	150.625	20191214	4	2019-12-14 14:00:01	8.18	25988.1	2.34	0.24	1.4	97
-33.5	150.625	20191214	5	2019-12-14 15:00:01	9.4	31911	2.91	0.3	1.4	111.6
-33.5	150.625	20191214	6	2019-12-14 16:00:01	8.25	30279.1	2.81	0.28	1.4
-33.5	150.625	20191214	7	2019-12-14 17:00:01	6.5	23691.9	2.26	0.22	1.4	40.6
-33.5	150.625	20191214	8	2019-12-14 18:00:01	5.16	15913.5	1.58	0.15	1.41	34.7
-33.5	150.625	20191214	9	2019-12-14 19:00:01	4.97	9893.41	1.06	0.09	1.41	26.1
-33.5	150.625	20191214	10	2019-12-14 20:00:01	4.9	6564.71	0.81	0.06	1.42	12.3
-33.5	150.625	20191214	11	2019-12-14 21:00:01	4.53	4702.98	0.65	0.05	1.43	11
-33.5	150.625	20191214	12	2019-12-14 22:00:01	3.48	3550.63	0.56	0.04	1.43	10.6
-33.5	150.625	20191214	13	2019-12-14 23:00:01	2.5	2837.97	0.56	0.03	1.44	13
-33.5	150.625	20191214	14	2019-12-15 00:00:01	2.26	2326.37	0.51	0.02	1.45	15.5
-33.5	150.625	20191214	15	2019-12-15 01:00:01	2.39	1941.29	0.48	0.02	1.46	14.8
-33.5	150.625	20191214	16	2019-12-15 02:00:01	2.42	1672.44	0.43	0.02	1.46	11.6
-33.5	150.625	20191214	17	2019-12-15 03:00:01	2.42	1565.99	0.4	0.02	1.46	16.5
-33.5	150.625	20191214	18	2019-12-15 04:00:01	2.5	1545.58	0.4	0.02	1.46	15.2
-33.5	150.625	20191214	19	2019-12-15 05:00:01	2.61	1552.13	0.38	0.02	1.46	17.6
-33.5	150.625	20191214	20	2019-12-15 06:00:01	1.81	1619.52	0.32	0.02	1.45	17
-33.5	150.625	20191214	21	2019-12-15 07:00:01	1.54	1798.36	0.29	0.02	1.44	9.9
-33.5	150.625	20191214	22	2019-12-15 08:00:01	1.66	2365.26	0.33	0.02	1.43	9.1
-33.5	150.625	20191214	23	2019-12-15 09:00:01	2.37	3923.79	0.45	0.04	1.41	25.3
-33.5	150.625	20191215	0	2019-12-15 10:00:01	5.44	12945.9	1.31	0.12	1.41	52.4
-33.5	150.625	20191215	1	2019-12-15 11:00:01	12.89	28875.5	2.69	0.27	1.4	72.8
-33.5	150.625	20191215	2	2019-12-15 12:00:01	21.36	50713.8	4.61	0.47	1.4	65.6
-33.5	150.625	20191215	3	2019-12-15 13:00:01	29.26	73239.2	6.53	0.68	1.4	65.7
-33.5	150.625	20191215	4	2019-12-15 14:00:01	47.42	87088.3	7.55	0.81	1.4	95.8
-33.5	150.625	20191215	5	2019-12-15 15:00:01	66.71	82125.7	6.97	0.76	1.4	104.6
-33.5	150.625	20191215	6	2019-12-15 16:00:01	65.83	59624.5	4.97	0.55	1.4	64.2
-33.5	150.625	20191215	7	2019-12-15 17:00:01	55.7	34769.9	2.85	0.32	1.4	27.2
-33.5	150.625	20191215	8	2019-12-15 18:00:01	43.35	20413.4	1.67	0.19	1.41
-33.5	150.625	20191215	9	2019-12-15 19:00:01	30.33	14010.4	1.15	0.13	1.41
-33.5	150.625	20191215	10	2019-12-15 20:00:01	21.52	10523.9	0.85	0.1	1.41
-33.5	150.625	20191215	11	2019-12-15 21:00:01	15.26	7618.24	0.61	0.07	1.41	1
-33.5	150.625	20191215	12	2019-12-15 22:00:01	10.45	5081.26	0.41	0.05	1.41	9
-33.5	150.625	20191215	13	2019-12-15 23:00:01	7.08	3323	0.27	0.03	1.41	21.4
-33.5	150.625	20191215	14	2019-12-16 00:00:01	4.64	2227.44	0.19	0.02	1.41	22.8
-33.5	150.625	20191215	15	2019-12-16 01:00:01	3.21	1555.83	0.14	0.01	1.42	22.9
-33.5	150.625	20191215	16	2019-12-16 02:00:01	2.95	1230.14	0.11	0.01	1.42	23.2
-33.5	150.625	20191215	17	2019-12-16 03:00:01	3.15	1154.56	0.1	0.01	1.42	27.5
-33.5	150.625	20191215	18	2019-12-16 04:00:01	3.62	1210.28	0.11	0.01	1.42	32.6
-33.5	150.625	20191215	19	2019-12-16 05:00:01	4.25	1327.21	0.12	0.01	1.42
-33.5	150.625	20191215	20	2019-12-16 06:00:01	3.26	1488.99	0.13	0.01	1.41	26.1
-33.5	150.625	20191215	21	2019-12-16 07:00:01	1.44	1605.22	0.15	0.02	1.41	28.7
-33.5	150.625	20191215	22	2019-12-16 08:00:01	1.23	1909.02	0.18	0.02	1.41	28.5
-33.5	150.625	20191215	23	2019-12-16 09:00:01	1.89	3496.82	0.33	0.03	1.41	31
-33.5	150.625	20191216	0	2019-12-16 10:00:01	2.52	5487.36	0.51	0.05	1.4	41.3
-33.5	150.625	20191216	1	2019-12-16 11:00:01	5.44	13519.4	1.24	0.13	1.4	42.5
-33.5	150.625	20191216	2	2019-12-16 12:00:01	7.9	22654.1	2.09	0.21	1.4	39.9
-33.5	150.625	20191216	3	2019-12-16 13:00:01	5.62	16876.3	1.57	0.16	1.4	31.5
-33.5	150.625	20191216	4	2019-12-16 14:00:01	7.09	25243.7	2.39	0.24	1.4	31.7
-33.5	150.625	20191216	5	2019-12-16 15:00:01	6.04	27963.5	2.72	0.26	1.41	24.3
-33.5	150.625	20191216	6	2019-12-16 16:00:01	4.35	24476.9	2.53	0.23	1.41	17.1
-33.5	150.625	20191216	7	2019-12-16 17:00:01	3.11	19006	2.12	0.18	1.41	15.8
-33.5	150.625	20191216	8	2019-12-16 18:00:01	2.28	13867.9	1.77	0.13	1.42	17.6
-33.5	150.625	20191216	9	2019-12-16 19:00:01	1.86	10028.5	1.54	0.1	1.42	16.5
-33.5	150.625	20191216	10	2019-12-16 20:00:01	1.54	7077.09	1.16	0.07	1.42	7.7
-33.5	150.625	20191216	11	2019-12-16 21:00:01	1.19	4989.22	0.81	0.05	1.42	9.9
-33.5	150.625	20191216	12	2019-12-16 22:00:01	0.98	3732.96	0.6	0.04	1.42	9.7
-33.5	150.625	20191216	13	2019-12-16 23:00:01	0.89	3018.35	0.47	0.03	1.42	4.7
-33.5	150.625	20191216	14	2019-12-17 00:00:01	0.76	2558.98	0.38	0.02	1.42	5.3
-33.5	150.625	20191216	15	2019-12-17 01:00:01	0.66	2293.7	0.35	0.02	1.42	2.8
-33.5	150.625	20191216	16	2019-12-17 02:00:01	0.67	2146.53	0.32	0.02	1.42	6.9
-33.5	150.625	20191216	17	2019-12-17 03:00:01	0.79	2057.38	0.29	0.02	1.42	9.3
-33.5	150.625	20191216	18	2019-12-17 04:00:01	1	1988.02	0.29	0.02	1.42	6.9
-33.5	150.625	20191216	19	2019-12-17 05:00:01	1.1	1925.35	0.27	0.02	1.42	14.4
-33.5	150.625	20191216	20	2019-12-17 06:00:01	0.68	1854.49	0.23	0.02	1.41	12.3
-33.5	150.625	20191216	21	2019-12-17 07:00:01	0.6	1809.92	0.2	0.02	1.41
-33.5	150.625	20191216	22	2019-12-17 08:00:01	0.79	1924.43	0.2	0.02	1.41	-0.8
-33.5	150.625	20191216	23	2019-12-17 09:00:01	1.5	2649.19	0.26	0.02	1.4	9.3
-33.5	150.625	20191217	0	2019-12-17 10:00:01	2.11	3461.53	0.33	0.03	1.4	12.3
-33.5	150.625	20191217	1	2019-12-17 11:00:01	3.47	6400.68	0.57	0.06	1.4	14.3
-33.5	150.625	20191217	2	2019-12-17 12:00:01	4.52	9387.77	0.81	0.09	1.4	14.9
-33.5	150.625	20191217	3	2019-12-17 13:00:01	4.26	9257.27	0.79	0.09	1.4	10.3
-33.5	150.625	20191217	4	2019-12-17 14:00:01	5.19	11302.7	0.95	0.11	1.4	12.7
-33.5	150.625	20191217	5	2019-12-17 15:00:01	4.91	11142.9	0.93	0.1	1.4	6.6
-33.5	150.625	20191217	6	2019-12-17 16:00:01	4.22	9962.28	0.82	0.09	1.4	2.1
-33.5	150.625	20191217	7	2019-12-17 17:00:01	3.5	8647.64	0.7	0.08	1.4	9.6
-33.5	150.625	20191217	8	2019-12-17 18:00:01	2.7	7260.36	0.57	0.07	1.4	9.5
-33.5	150.625	20191217	9	2019-12-17 19:00:01	2.42	6007.06	0.46	0.06	1.4	5.6
-33.5	150.625	20191217	10	2019-12-17 20:00:01	2.5	5146.5	0.39	0.05	1.4	3.3
-33.5	150.625	20191217	11	2019-12-17 21:00:01	2.61	4630.8	0.35	0.04	1.41	6.5
-33.5	150.625	20191217	12	2019-12-17 22:00:01	2.93	4256.75	0.33	0.04	1.41	12.2
-33.5	150.625	20191217	13	2019-12-17 23:00:01	3.24	3960.88	0.33	0.04	1.41	7
-33.5	150.625	20191217	14	2019-12-18 00:00:01	3.3	3770.99	0.31	0.04	1.41	4.6
-33.5	150.625	20191217	15	2019-12-18 01:00:01	3.29	3689.1	0.3	0.03	1.41	3.4
-33.5	150.625	20191217	16	2019-12-18 02:00:01	3.36	3765.09	0.3	0.04	1.4	2.8
-33.5	150.625	20191217	17	2019-12-18 03:00:02	3.53	4020.25	0.31	0.04	1.4	2.8
-33.5	150.625	20191217	18	2019-12-18 04:00:02	3.7	4428.67	0.33	0.04	1.4	3.3
-33.5	150.625	20191217	19	2019-12-18 05:00:02	3.85	4856.66	0.36	0.05	1.4	7
-33.5	150.625	20191217	20	2019-12-18 06:00:02	3.35	5138.2	0.38	0.05	1.4	5.6
-33.5	150.625	20191217	21	2019-12-18 07:00:02	1.78	5265.72	0.39	0.05	1.41
-33.5	150.625	20191217	22	2019-12-18 08:00:02	1.39	5375.96	0.41	0.05	1.41
-33.5	150.625	20191217	23	2019-12-18 09:00:02	1.43	5750.4	0.45	0.05	1.41	48.8
-33.5	150.625	20191218	0	2019-12-18 10:00:02	6.1	11656	0.96	0.11	1.41	83
-33.5	150.625	20191218	1	2019-12-18 11:00:02	16.76	29232.3	2.4	0.27	1.41	68.9
-33.5	150.625	20191218	2	2019-12-18 12:00:02	26.26	49132.7	4.03	0.46	1.41	48.9
-33.5	150.625	20191218	3	2019-12-18 13:00:02	13.09	27620.5	2.27	0.26	1.41	47.5
-33.5	150.625	20191218	4	2019-12-18 14:00:02	22.2	49966.2	4.02	0.47	1.4	66.4
-33.5	150.625	20191218	5	2019-12-18 15:00:02	24.27	62365.3	5.03	0.58	1.4	88.9
-33.5	150.625	20191218	6	2019-12-18 16:00:02	27.85	64004.7	5.23	0.6	1.4
-33.5	150.625	20191218	7	2019-12-18 17:00:02	37.15	65554.5	5.44	0.61	1.4
-33.5	150.625	20191218	8	2019-12-18 18:00:02	35.89	63736.7	5.35	0.59	1.4	3.6
-33.5	150.625	20191218	9	2019-12-18 19:00:02	33.09	59171.6	4.99	0.55	1.4	8.6
-33.5	150.625	20191218	10	2019-12-18 20:00:02	31.37	52888.9	4.45	0.49	1.4	2.5
-33.5	150.625	20191218	11	2019-12-18 21:00:02	31.53	46674.7	3.91	0.43	1.4	99.3
-33.5	150.625	20191218	12	2019-12-18 22:00:02	35.9	41558.7	3.46	0.39	1.4	107.4
-33.5	150.625	20191218	13	2019-12-18 23:00:02	41.49	37273.3	3.09	0.35	1.4	36.8
-33.5	150.625	20191218	14	2019-12-19 00:00:02	44.21	32978.8	2.71	0.31	1.4	12.9
-33.5	150.625	20191218	15	2019-12-19 01:00:02	43.83	28396.8	2.3	0.26	1.4	7.5
-33.5	150.625	20191218	16	2019-12-19 02:00:02	42.49	24010.3	1.92	0.22	1.4	8.9
-33.5	150.625	20191218	17	2019-12-19 03:00:02	41.04	20531.7	1.62	0.19	1.4	10.3
-33.5	150.625	20191218	18	2019-12-19 04:00:02	38.81	17714.7	1.38	0.16	1.4	8.6
-33.5	150.625	20191218	19	2019-12-19 05:00:02	35.91	15458.1	1.2	0.14	1.4	0.7
-33.5	150.625	20191218	20	2019-12-19 06:00:02	32.25	13616.6	1.04	0.13	1.4	3.2
-33.5	150.625	20191218	21	2019-12-19 07:00:02	27.08	11909.5	0.89	0.11	1.4	4.3
-33.5	150.625	20191218	22	2019-12-19 08:00:02	20.6	11083.2	0.81	0.1	1.4	7
-33.5	150.625	20191218	23	2019-12-19 09:00:02	9.59	13074	0.95	0.12	1.4	11.3
-33.5	150.625	20191219	0	2019-12-19 10:00:02	10.83	23111.6	1.73	0.22	1.4	45.8
-33.5	150.625	20191219	1	2019-12-19 11:00:02	19.14	44986.5	3.41	0.42	1.4	89
-33.5	150.625	20191219	2	2019-12-19 12:00:02	26.79	69633.3	5.38	0.65	1.4	130.3
-33.5	150.625	20191219	3	2019-12-19 13:00:02	8.59	28444.5	2.47	0.27	1.41	170.5
-33.5	150.625	20191219	4	2019-12-19 14:00:02	14.36	48173.6	4.43	0.45	1.41	169
-33.5	150.625	20191219	5	2019-12-19 15:00:02	22.69	53597.7	5.39	0.51	1.42	138.2
-33.5	150.625	20191219	6	2019-12-19 16:00:02	34.87	45938.5	4.73	0.44	1.41	122.8
-33.5	150.625	20191219	7	2019-12-19 17:00:02	28.31	33242.7	3.2	0.31	1.41	94.8
-33.5	150.625	20191219	8	2019-12-19 18:00:02	9.91	22908.7	2.08	0.21	1.4	39.2
-33.5	150.625	20191219	9	2019-12-19 19:00:02	6.06	17373.1	1.56	0.16	1.4	17.3
-33.5	150.625	20191219	10	2019-12-19 20:00:02	4.8	14158.3	1.28	0.13	1.4	8.4
-33.5	150.625	20191219	11	2019-12-19 21:00:02	4.61	12158.1	1.11	0.11	1.4	9.4
-33.5	150.625	20191219	12	2019-12-19 22:00:02	5.34	10959.1	1	0.1	1.4	7.7
-33.5	150.625	20191219	13	2019-12-19 23:00:02	6.23	10080.7	0.92	0.09	1.4	7.2
-33.5	150.625	20191219	14	2019-12-20 00:00:02	6.07	9176.5	0.84	0.09	1.4	6.2
-33.5	150.625	20191219	15	2019-12-20 01:00:02	6	8320.65	0.76	0.08	1.4	7.2
-33.5	150.625	20191219	16	2019-12-20 02:00:02	6.29	7665.75	0.7	0.07	1.4	7.9
-33.5	150.625	20191219	17	2019-12-20 03:00:02	6.94	7210.13	0.66	0.07	1.4	4.7
-33.5	150.625	20191219	18	2019-12-20 04:00:02	7.68	6776.83	0.62	0.06	1.4	4.7
-33.5	150.625	20191219	19	2019-12-20 05:00:02	7.59	6222.41	0.59	0.06	1.41	10.3
-33.5	150.625	20191219	20	2019-12-20 06:00:02	4.2	5539.46	0.53	0.05	1.41	13.7
-33.5	150.625	20191219	21	2019-12-20 07:00:02	2.27	4925.22	0.45	0.05	1.41
-33.5	150.625	20191219	22	2019-12-20 08:00:02	2.32	4769.33	0.43	0.04	1.4
-33.5	150.625	20191219	23	2019-12-20 09:00:02	4.32	6178.56	0.55	0.06	1.4
-33.5	150.625	20191220	0	2019-12-20 10:00:02	4.41	7039.85	0.61	0.07	1.4	0.4
-33.5	150.625	20191220	1	2019-12-20 11:00:02	7.51	14073.6	1.19	0.13	1.4	19.3
-33.5	150.625	20191220	2	2019-12-20 12:00:02	9.82	23987.5	2	0.22	1.4	24.3
-33.5	150.625	20191220	3	2019-12-20 13:00:02	4.8	15192.7	1.27	0.14	1.4	13.9
-33.5	150.625	20191220	4	2019-12-20 14:00:02	6.6	26734.8	2.25	0.25	1.4	10.8
-33.5	150.625	20191220	5	2019-12-20 15:00:02	5.72	32449.4	2.74	0.3	1.4	8.6
-33.5	150.625	20191220	6	2019-12-20 16:00:02	3.39	19453.5	1.67	0.18	1.4	4.4
-33.5	150.625	20191220	7	2019-12-20 17:00:02	2.91	20527	1.78	0.19	1.4	4.6
-33.5	150.625	20191220	8	2019-12-20 18:00:02	2.66	20566.5	1.77	0.19	1.4	9.9
-33.5	150.625	20191220	9	2019-12-20 19:00:02	2.6	19956	1.72	0.19	1.4	4.3
-33.5	150.625	20191220	10	2019-12-20 20:00:02	2.6	19143.1	1.65	0.18	1.4	4.4
-33.5	150.625	20191220	11	2019-12-20 21:00:02	2.75	18022.3	1.56	0.17	1.4	7.2
-33.5	150.625	20191220	12	2019-12-20 22:00:02	3.25	17051.8	1.47	0.16	1.4	4.4
-33.5	150.625	20191220	13	2019-12-20 23:00:02	3.73	16440.5	1.42	0.15	1.4	8
-33.5	150.625	20191220	14	2019-12-21 00:00:02	4	15919.2	1.36	0.15	1.4	8.5
-33.5	150.625	20191220	15	2019-12-21 01:00:02	4.45	15249.9	1.3	0.14	1.4	8.3
-33.5	150.625	20191220	16	2019-12-21 02:00:02	5.27	14383.5	1.22	0.13	1.4	7.7
-33.5	150.625	20191220	17	2019-12-21 03:00:02	6.42	13439.3	1.14	0.12	1.4	4
-33.5	150.625	20191220	18	2019-12-21 04:00:02	7.86	12593.3	1.07	0.12	1.4	5.3
-33.5	150.625	20191220	19	2019-12-21 05:00:02	9.5	11684	1.01	0.11	1.4	4.2
-33.5	150.625	20191220	20	2019-12-21 06:00:02	10.47	10638	0.93	0.1	1.4	4.5
-33.5	150.625	20191220	21	2019-12-21 07:00:02	8.71	9669.36	0.85	0.09	1.4
-33.5	150.625	20191220	22	2019-12-21 08:00:02	6.96	9435.19	0.81	0.09	1.4	3
-33.5	150.625	20191220	23	2019-12-21 09:00:02	6.96	10769.1	0.9	0.1	1.4	20
-33.5	150.625	20191221	0	2019-12-21 10:00:02	17.37	28437.2	2.25	0.26	1.4	22.6
-33.5	150.625	20191221	1	2019-12-21 11:00:02	37.35	72580.7	5.61	0.67	1.4	38.2
-33.5	150.625	20191221	2	2019-12-21 12:00:02	69.01	123513	9.52	1.15	1.4	52.4
-33.5	150.625	20191221	3	2019-12-21 13:00:02	19.54	47974.5	3.89	0.45	1.4	80.6
-33.5	150.625	20191221	4	2019-12-21 14:00:02	43.23	98549.1	7.89	0.92	1.4	124.7
-33.5	150.625	20191221	5	2019-12-21 15:00:02	81.23	120239	9.55	1.12	1.4	149.1
-33.5	150.625	20191221	6	2019-12-21 16:00:02	87.98	116125	9.23	1.08	1.4	154.8
-33.5	150.625	20191221	7	2019-12-21 17:00:02	63.71	87485.7	7.05	0.81	1.4	141.5
-33.5	150.625	20191221	8	2019-12-21 18:00:02	32.44	54540.9	4.61	0.51	1.4	124.7
-33.5	150.625	20191221	9	2019-12-21 19:00:02	15.85	37929.6	3.51	0.35	1.4	89.3
-33.5	150.625	20191221	10	2019-12-21 20:00:02	7.93	27530.6	2.68	0.26	1.4	54.9
-33.5	150.625	20191221	11	2019-12-21 21:00:02	5.78	18388.8	1.86	0.17	1.4	37.3
-33.5	150.625	20191221	12	2019-12-21 22:00:02	5.03	10912.8	1.16	0.1	1.4	31.9
-33.5	150.625	20191221	13	2019-12-21 23:00:02	4.16	6774	0.76	0.06	1.4	24.2
-33.5	150.625	20191221	14	2019-12-22 00:00:02	2.88	4735.78	0.57	0.04	1.41	10.7
-33.5	150.625	20191221	15	2019-12-22 01:00:02	2.07	3753.44	0.49	0.04	1.41	9.3
-33.5	150.625	20191221	16	2019-12-22 02:00:02	1.74	3199.61	0.46	0.03	1.42	12.9
-33.5	150.625	20191221	17	2019-12-22 03:00:02	1.73	2833.23	0.43	0.03	1.42	13.3
-33.5	150.625	20191221	18	2019-12-22 04:00:02	1.72	2567.59	0.4	0.03	1.42	12.5
-33.5	150.625	20191221	19	2019-12-22 05:00:02	1.56	2425.68	0.38	0.02	1.42	13.7
-33.5	150.625	20191221	20	2019-12-22 06:00:02	1.15	2275.42	0.35	0.02	1.43	11
-33.5	150.625	20191221	21	2019-12-22 07:00:02	1.05	2362.02	0.34	0.02	1.43	11.2
-33.5	150.625	20191221	22	2019-12-22 08:00:02	1.68	3629.1	0.46	0.04	1.42	17.1
-33.5	150.625	20191221	23	2019-12-22 09:00:02	4.45	7546.95	0.87	0.07	1.42	16.5
-33.5	150.625	20191222	0	2019-12-22 10:00:02	6.34	12598.6	1.41	0.12	1.42	16.1
-33.5	150.625	20191222	1	2019-12-22 11:00:02	13.8	26769.7	2.87	0.25	1.41	13.2
-33.5	150.625	20191222	2	2019-12-22 12:00:02	19.65	36992.3	3.85	0.35	1.41	11.6
-33.5	150.625	20191222	3	2019-12-22 13:00:02	24.99	45291.5	4.59	0.43	1.41	11.8
-33.5	150.625	20191222	4	2019-12-22 14:00:02	26.05	47808.8	4.84	0.45	1.41	18.3
-33.5	150.625	20191222	5	2019-12-22 15:00:02	21.41	43367.6	4.51	0.41	1.41	24.1
-33.5	150.625	20191222	6	2019-12-22 16:00:02	5.1	16673.6	1.93	0.16	1.42	26.4
-33.5	150.625	20191222	7	2019-12-22 17:00:02	5.04	18775.7	2.41	0.18	1.42	15.6
-33.5	150.625	20191222	8	2019-12-22 18:00:02	4.07	16592.9	2.3	0.17	1.43	15.8
-33.5	150.625	20191222	9	2019-12-22 19:00:02	2.96	12711.2	1.79	0.13	1.43	18.3
-33.5	150.625	20191222	10	2019-12-22 20:00:02	2.15	9376.58	1.25	0.09	1.43	15.9
-33.5	150.625	20191222	11	2019-12-22 21:00:02	1.77	7703.97	0.97	0.08	1.42	19
-33.5	150.625	20191222	12	2019-12-22 22:00:02	2.61	7030.47	0.87	0.07	1.42	18.2
-33.5	150.625	20191222	13	2019-12-22 23:00:02	3.49	6520.62	0.8	0.06	1.42	16.2
-33.5	150.625	20191222	14	2019-12-23 00:00:02	4.35	5956.14	0.73	0.06	1.42	13.3
-33.5	150.625	20191222	15	2019-12-23 01:00:02	4.27	5421.61	0.7	0.05	1.42	15.2
-33.5	150.625	20191222	16	2019-12-23 02:00:02	3.38	5047.56	0.7	0.05	1.43	14.7
-33.5	150.625	20191222	17	2019-12-23 03:00:02	3.54	4957.02	0.74	0.05	1.44	14
-33.5	150.625	20191222	18	2019-12-23 04:00:02	4.25	5039.85	0.78	0.05	1.45	15.5
-33.5	150.625	20191222	19	2019-12-23 05:00:02	4.45	4994.82	0.77	0.05	1.44	16.3
-33.5	150.625	20191222	20	2019-12-23 06:00:02	3.11	4640.53	0.7	0.05	1.44	18.1
-33.5	150.625	20191222	21	2019-12-23 07:00:02	2.02	4414.54	0.66	0.04	1.43	16.2
-33.5	150.625	20191222	22	2019-12-23 08:00:02	1.88	4641.5	0.69	0.05	1.43	19.3
-33.5	150.625	20191222	23	2019-12-23 09:00:02	3.27	6327.47	0.8	0.06	1.42	16.6
-33.5	150.625	20191223	0	2019-12-23 10:00:02	5.05	9036.03	1.01	0.09	1.41	17.4
-33.5	150.625	20191223	1	2019-12-23 11:00:02	6.52	12635.4	1.33	0.12	1.4	20.2
-33.5	150.625	20191223	2	2019-12-23 12:00:02	8.01	17377.7	1.77	0.16	1.4	17
-33.5	150.625	20191223	3	2019-12-23 13:00:02	3.37	9389.08	0.93	0.09	1.4	14.8
-33.5	150.625	20191223	4	2019-12-23 14:00:02	5.17	14656.8	1.44	0.14	1.4	12.6
-33.5	150.625	20191223	5	2019-12-23 15:00:02	5.32	16723.4	1.64	0.16	1.4	13.7
-33.5	150.625	20191223	6	2019-12-23 16:00:02	4.4	16558.8	1.64	0.15	1.4	13
-33.5	150.625	20191223	7	2019-12-23 17:00:02	3.17	15387.1	1.55	0.14	1.4	11
-33.5	150.625	20191223	8	2019-12-23 18:00:02	2.12	14039.1	1.44	0.13	1.4	12
-33.5	150.625	20191223	9	2019-12-23 19:00:02	1.66	13051.4	1.37	0.12	1.4	6.9
-33.5	150.625	20191223	10	2019-12-23 20:00:02	1.55	12120.3	1.31	0.11	1.4	5.3
-33.5	150.625	20191223	11	2019-12-23 21:00:02	1.6	11292.9	1.28	0.11	1.41	15.4
-33.5	150.625	20191223	12	2019-12-23 22:00:02	2.12	10353.3	1.25	0.1	1.41	13.4
-33.5	150.625	20191223	13	2019-12-23 23:00:02	2.76	9331.83	1.19	0.09	1.41	5.8
-33.5	150.625	20191223	14	2019-12-24 00:00:02	3.02	8344.26	1.1	0.08	1.42	4.6
-33.5	150.625	20191223	15	2019-12-24 01:00:02	3.18	7470.69	1.03	0.07	1.42	6.3
-33.5	150.625	20191223	16	2019-12-24 02:00:02	3.31	6774.14	0.93	0.07	1.42	4.9
-33.5	150.625	20191223	17	2019-12-24 03:00:02	3.51	6347.62	0.84	0.06	1.42	5
-33.5	150.625	20191223	18	2019-12-24 04:00:02	3.63	6014.17	0.81	0.06	1.42	7.9
-33.5	150.625	20191223	19	2019-12-24 05:00:02	3.6	5580.19	0.79	0.05	1.42
-33.5	150.625	20191223	20	2019-12-24 06:00:02	2.27	5246.89	0.77	0.05	1.43
-33.5	150.625	20191223	21	2019-12-24 07:00:02	1	5019.49	0.81	0.05	1.43	3.9
-33.5	150.625	20191223	22	2019-12-24 08:00:02	0.96	4956.46	0.84	0.05	1.43	7.5
-33.5	150.625	20191223	23	2019-12-24 09:00:02	1.43	5318.43	0.91	0.05	1.44	6.7
-33.5	150.625	20191224	0	2019-12-24 10:00:02	0.77	8174.16	1	0.08	1.42	5.9
-33.5	150.625	20191224	1	2019-12-24 11:00:02	0.99	8215.75	1	0.08	1.42	4.5
-33.5	150.625	20191224	2	2019-12-24 12:00:02	1.15	7739.16	0.95	0.07	1.42	2.7
-33.5	150.625	20191224	3	2019-12-24 13:00:02	1.15	6135.98	0.9	0.06	1.43	5.9
-33.5	150.625	20191224	4	2019-12-24 14:00:02	1.2	6011.45	0.91	0.06	1.43	15.8
-33.5	150.625	20191224	5	2019-12-24 15:00:02	1.05	5942.96	0.86	0.06	1.43	19.8
-33.5	150.625	20191224	6	2019-12-24 16:00:02	0.88	5983.71	0.88	0.06	1.42	16.3
-33.5	150.625	20191224	7	2019-12-24 17:00:02	0.75	6009.62	0.86	0.06	1.42	17.1
-33.5	150.625	20191224	8	2019-12-24 18:00:02	0.67	5946.5	0.82	0.06	1.42	14.3
-33.5	150.625	20191224	9	2019-12-24 19:00:02	0.69	5680.43	0.81	0.06	1.42	15.9
-33.5	150.625	20191224	10	2019-12-24 20:00:02	0.86	5247.9	0.77	0.05	1.43	16.8
-33.5	150.625	20191224	11	2019-12-24 21:00:02	0.92	4746.91	0.63	0.05	1.42	22.6
-33.5	150.625	20191224	12	2019-12-24 22:00:02	0.76	4396.93	0.54	0.04	1.42	21.3
-33.5	150.625	20191224	13	2019-12-24 23:00:02	0.66	4246.25	0.49	0.04	1.41	18.3
-33.5	150.625	20191224	14	2019-12-25 00:00:02	0.6	4201.63	0.47	0.04	1.41	11.8
-33.5	150.625	20191224	15	2019-12-25 01:00:02	0.58	4201.59	0.49	0.04	1.41	12.5
-33.5	150.625	20191224	16	2019-12-25 02:00:02	0.6	4229.29	0.5	0.04	1.41	9.7
-33.5	150.625	20191224	17	2019-12-25 03:00:02	0.64	4285	0.51	0.04	1.41	11.2
-33.5	150.625	20191224	18	2019-12-25 04:00:02	0.68	4345.39	0.54	0.04	1.41	8.8
-33.5	150.625	20191224	19	2019-12-25 05:00:02	0.72	4406.32	0.55	0.04	1.41	9.7
-33.5	150.625	20191224	20	2019-12-25 06:00:02	0.52	4429.16	0.54	0.04	1.41	5.6
-33.5	150.625	20191224	21	2019-12-25 07:00:02	0.34	4390.18	0.54	0.04	1.41	2.4
-33.5	150.625	20191224	22	2019-12-25 08:00:02	0.35	4285.9	0.54	0.04	1.41	8.4
-33.5	150.625	20191224	23	2019-12-25 09:00:02	0.45	4213.79	0.53	0.04	1.41	8.5
-33.5	150.625	20191225	0	2019-12-25 10:00:02	0.71	3631.45	0.49	0.04	1.42	14.9
-33.5	150.625	20191225	1	2019-12-25 11:00:02	1.15	4278.12	0.57	0.04	1.42	15.4
-33.5	150.625	20191225	2	2019-12-25 12:00:02	1.42	4776.06	0.66	0.05	1.42	15.5
-33.5	150.625	20191225	3	2019-12-25 13:00:02	1.33	4254.37	0.61	0.04	1.43	19.7
-33.5	150.625	20191225	4	2019-12-25 14:00:02	1.46	4574.27	0.7	0.05	1.43	22.9
-33.5	150.625	20191225	5	2019-12-25 15:00:02	1.32	4496.89	0.72	0.05	1.43	18.3
-33.5	150.625	20191225	6	2019-12-25 16:00:02	1.11	4518.58	0.72	0.05	1.43	19.2
-33.5	150.625	20191225	7	2019-12-25 17:00:02	0.94	4741.92	0.75	0.05	1.42	22.2
-33.5	150.625	20191225	8	2019-12-25 18:00:02	0.78	4938.96	0.79	0.05	1.42	21.6
-33.5	150.625	20191225	9	2019-12-25 19:00:02	0.68	5018.96	0.8	0.05	1.42	16.4
-33.5	150.625	20191225	10	2019-12-25 20:00:02	0.66	4998.64	0.76	0.05	1.42	10.9
-33.5	150.625	20191225	11	2019-12-25 21:00:02	0.67	4883.35	0.72	0.05	1.42	8.7
-33.5	150.625	20191225	12	2019-12-25 22:00:02	0.73	4741.56	0.66	0.05	1.42	9
-33.5	150.625	20191225	13	2019-12-25 23:00:02	0.92	4648.4	0.62	0.05	1.41	11.3
-33.5	150.625	20191225	14	2019-12-26 00:00:02	1.04	4613.2	0.6	0.04	1.41	11.9
-33.5	150.625	20191225	15	2019-12-26 01:00:02	1.1	4619.18	0.6	0.04	1.41	12.4
-33.5	150.625	20191225	16	2019-12-26 02:00:02	1.21	4638.17	0.59	0.04	1.41	8.9
-33.5	150.625	20191225	17	2019-12-26 03:00:02	1.35	4651.87	0.58	0.04	1.41	7
-33.5	150.625	20191225	18	2019-12-26 04:00:02	1.46	4659.65	0.59	0.04	1.41	8.8
-33.5	150.625	20191225	19	2019-12-26 05:00:02	1.53	4660.11	0.59	0.04	1.41	9
-33.5	150.625	20191225	20	2019-12-26 06:00:02	0.95	4622.51	0.58	0.04	1.41	3.8
-33.5	150.625	20191225	21	2019-12-26 07:00:02	0.58	4542.66	0.54	0.04	1.41	3.7
-33.5	150.625	20191225	22	2019-12-26 08:00:02	0.62	4462.36	0.52	0.04	1.4	4.3
-33.5	150.625	20191225	23	2019-12-26 09:00:02	0.82	4455.59	0.51	0.04	1.4	6.8
-33.5	150.625	20191226	0	2019-12-26 10:00:02	1.59	5829.9	0.64	0.05	1.4	12.9
-33.5	150.625	20191226	1	2019-12-26 11:00:03	2.55	7746.91	0.83	0.07	1.4	15.5
-33.5	150.625	20191226	2	2019-12-26 12:00:03	3.34	9791.98	1.04	0.09	1.41	19.8
-33.5	150.625	20191226	3	2019-12-26 13:00:03	2.88	8652.87	0.92	0.08	1.41	19.5
-33.5	150.625	20191226	4	2019-12-26 14:00:03	3.4	10430.7	1.13	0.1	1.41	26
-33.5	150.625	20191226	5	2019-12-26 15:00:03	3.15	10841.4	1.19	0.1	1.41
-33.5	150.625	20191226	6	2019-12-26 16:00:03	2.54	10730.6	1.2	0.1	1.41	4.9
-33.5	150.625	20191226	7	2019-12-26 17:00:03	1.97	10690.8	1.18	0.1	1.41	12.2
-33.5	150.625	20191226	8	2019-12-26 18:00:03	1.53	10698.8	1.16	0.1	1.4	17.1
-33.5	150.625	20191226	9	2019-12-26 19:00:03	1.45	10743.5	1.16	0.1	1.4	15.6
-33.5	150.625	20191226	10	2019-12-26 20:00:03	1.54	10769.6	1.17	0.1	1.4	13.9
-33.5	150.625	20191226	11	2019-12-26 21:00:03	1.69	10687.6	1.17	0.1	1.4	13.3
-33.5	150.625	20191226	12	2019-12-26 22:00:03	2.02	10553.7	1.15	0.1	1.4	7.1
-33.5	150.625	20191226	13	2019-12-26 23:00:03	2.26	10356.3	1.13	0.1	1.4	2.7
-33.5	150.625	20191226	14	2019-12-27 00:00:03	2.29	10062	1.11	0.09	1.4	5.3
-33.5	150.625	20191226	15	2019-12-27 01:00:03	2.27	9674.66	1.06	0.09	1.4	4.5
-33.5	150.625	20191226	16	2019-12-27 02:00:03	2.28	9223.64	1	0.09	1.4	6.3
-33.5	150.625	20191226	17	2019-12-27 03:00:03	2.34	8739.45	0.93	0.08	1.4	4.8
-33.5	150.625	20191226	18	2019-12-27 04:00:03	2.37	8277.31	0.87	0.08	1.4	6.2
-33.5	150.625	20191226	19	2019-12-27 05:00:03	2.31	7882.24	0.82	0.07	1.4	11.8
-33.5	150.625	20191226	20	2019-12-27 06:00:03	1.49	7498.77	0.76	0.07	1.4	7.3
-33.5	150.625	20191226	21	2019-12-27 07:00:03	0.75	7094.33	0.7	0.07	1.4	1.5
-33.5	150.625	20191226	22	2019-12-27 08:00:03	0.63	6804.36	0.66	0.06	1.4	22.2
-33.5	150.625	20191226	23	2019-12-27 09:00:03	0.9	6807.17	0.66	0.06	1.4	16
-33.5	150.625	20191227	0	2019-12-27 10:00:03	1.65	8275.01	0.8	0.08	1.4	13.7
-33.5	150.625	20191227	1	2019-12-27 11:00:03	2.33	9359.11	0.89	0.09	1.4	20.9
-33.5	150.625	20191227	2	2019-12-27 12:00:03	2.82	10164.2	0.95	0.09	1.4	40.5
-33.5	150.625	20191227	3	2019-12-27 13:00:03	2.16	7506.91	0.7	0.07	1.4	23.1
-33.5	150.625	20191227	4	2019-12-27 14:00:03	2.22	7736.53	0.71	0.07	1.4	10.3
-33.5	150.625	20191227	5	2019-12-27 15:00:03	1.9	7498.47	0.69	0.07	1.4	5.5
-33.5	150.625	20191227	6	2019-12-27 16:00:03	1.48	7247.71	0.66	0.07	1.4
-33.5	150.625	20191227	7	2019-12-27 17:00:03	1.13	7123.98	0.65	0.07	1.4	-1.9
-33.5	150.625	20191227	8	2019-12-27 18:00:03	0.82	7106.76	0.65	0.07	1.4	0.5
-33.5	150.625	20191227	9	2019-12-27 19:00:03	0.7	7182.26	0.66	0.07	1.4
-33.5	150.625	20191227	10	2019-12-27 20:00:03	0.73	7311.9	0.68	0.07	1.4
-33.5	150.625	20191227	11	2019-12-27 21:00:03	0.78	7467.58	0.7	0.07	1.4	-0.3
-33.5	150.625	20191227	12	2019-12-27 22:00:03	0.92	7650.26	0.72	0.07	1.4	5.4
-33.5	150.625	20191227	13	2019-12-27 23:00:03	1.04	7788.05	0.73	0.07	1.4	7.5
-33.5	150.625	20191227	14	2019-12-28 00:00:03	1.07	7810.01	0.73	0.07	1.4	6.7
-33.5	150.625	20191227	15	2019-12-28 01:00:03	1.08	7731.6	0.72	0.07	1.4	10.2
-33.5	150.625	20191227	16	2019-12-28 02:00:03	1.14	7535.69	0.7	0.07	1.4	6.8
-33.5	150.625	20191227	17	2019-12-28 03:00:03	1.27	7271.34	0.67	0.07	1.4	6.9
-33.5	150.625	20191227	18	2019-12-28 04:00:03	1.48	7029.35	0.65	0.07	1.4	5.7
-33.5	150.625	20191227	19	2019-12-28 05:00:03	1.75	6838.43	0.62	0.06	1.4	9.3
-33.5	150.625	20191227	20	2019-12-28 06:00:03	1.9	6637.9	0.6	0.06	1.4	7.5
-33.5	150.625	20191227	21	2019-12-28 07:00:03	1.21	6377.16	0.57	0.06	1.4
-33.5	150.625	20191227	22	2019-12-28 08:00:03	1.01	6185.96	0.54	0.06	1.4
-33.5	150.625	20191227	23	2019-12-28 09:00:03	1.11	6195.89	0.54	0.06	1.4	-0.4
-33.5	150.625	20191228	0	2019-12-28 10:00:03	1.81	5948.49	0.51	0.06	1.4	13.4
-33.5	150.625	20191228	1	2019-12-28 11:00:03	3.5	9205.58	0.77	0.09	1.4	28.6
-33.5	150.625	20191228	2	2019-12-28 12:00:03	4.76	12615.8	1.05	0.12	1.4	38.5
-33.5	150.625	20191228	3	2019-12-28 13:00:03	3.04	9110.48	0.76	0.08	1.4	56.4
-33.5	150.625	20191228	4	2019-12-28 14:00:03	3.71	12187.2	1.03	0.11	1.4	50.4
-33.5	150.625	20191228	5	2019-12-28 15:00:03	3.87	14899.4	1.28	0.14	1.4	30.4
-33.5	150.625	20191228	6	2019-12-28 16:00:03	3.83	18714.2	1.72	0.18	1.4	24.6
-33.5	150.625	20191228	7	2019-12-28 17:00:03	3.92	23870.6	2.34	0.22	1.41	23.4
-33.5	150.625	20191228	8	2019-12-28 18:00:03	4.11	28475.9	2.82	0.27	1.41	20.3
-33.5	150.625	20191228	9	2019-12-28 19:00:03	3.87	31329.8	3.19	0.3	1.41	17.7
-33.5	150.625	20191228	10	2019-12-28 20:00:03	3.61	32865.3	3.53	0.31	1.41	11.1
-33.5	150.625	20191228	11	2019-12-28 21:00:03	3.66	33670.5	4	0.33	1.42	10.5
-33.5	150.625	20191228	12	2019-12-28 22:00:03	4.24	33864.3	4.49	0.33	1.43	12.1
-33.5	150.625	20191228	13	2019-12-28 23:00:03	5.48	33640.7	4.48	0.33	1.43	9.5
-33.5	150.625	20191228	14	2019-12-29 00:00:03	6.98	33132.9	4.3	0.33	1.43	10.5
-33.5	150.625	20191228	15	2019-12-29 01:00:03	8.43	32044.6	3.96	0.31	1.42	11.3
-33.5	150.625	20191228	16	2019-12-29 02:00:03	9.64	30339	3.49	0.29	1.42	11.2
-33.5	150.625	20191228	17	2019-12-29 03:00:03	10.58	27992.4	2.89	0.27	1.41	7.6
-33.5	150.625	20191228	18	2019-12-29 04:00:03	11.08	25161.1	2.41	0.24	1.41	8.2
-33.5	150.625	20191228	19	2019-12-29 05:00:03	11.08	22173.6	2.05	0.21	1.4	10.7
-33.5	150.625	20191228	20	2019-12-29 06:00:03	10.94	19423.9	1.75	0.18	1.4	14.6
-33.5	150.625	20191228	21	2019-12-29 07:00:03	9.95	17053.7	1.51	0.16	1.4	10.6
-33.5	150.625	20191228	22	2019-12-29 08:00:03	8.04	15190.4	1.32	0.14	1.41	20.9
-33.5	150.625	20191228	23	2019-12-29 09:00:03	7.06	14105.7	1.2	0.13	1.41	16.4
-33.5	150.625	20191229	0	2019-12-29 10:00:03	3.12	17044.3	1.45	0.16	1.41	41.6
-33.5	150.625	20191229	1	2019-12-29 11:00:03	4.35	18699.3	1.58	0.17	1.41	101.7
-33.5	150.625	20191229	2	2019-12-29 12:00:03	5.27	21715.7	1.82	0.2	1.41	122.2
-33.5	150.625	20191229	3	2019-12-29 13:00:03	6.15	27513.6	2.34	0.26	1.4	109.4
-33.5	150.625	20191229	4	2019-12-29 14:00:03	6.27	32579.9	3.01	0.31	1.41	115.4
-33.5	150.625	20191229	5	2019-12-29 15:00:03	5.88	37154.1	3.69	0.35	1.41	133.7
-33.5	150.625	20191229	6	2019-12-29 16:00:03	5.92	40969.1	4.24	0.39	1.41	121.4
-33.5	150.625	20191229	7	2019-12-29 17:00:03	6.45	42057.4	4.64	0.4	1.41
-33.5	150.625	20191229	8	2019-12-29 18:00:03	6.99	39554.5	4.37	0.38	1.41
-33.5	150.625	20191229	9	2019-12-29 19:00:03	7.67	34770.6	3.64	0.33	1.41	41.1
-33.5	150.625	20191229	10	2019-12-29 20:00:03	8.82	29613.9	2.95	0.28	1.41	36.3
-33.5	150.625	20191229	11	2019-12-29 21:00:03	10.06	25321.9	2.49	0.24	1.41	42.3
-33.5	150.625	20191229	12	2019-12-29 22:00:03	10.6	22177.8	2.19	0.21	1.41	41.7
-33.5	150.625	20191229	13	2019-12-29 23:00:03	10.74	20084.4	1.99	0.19	1.41	33.7
-33.5	150.625	20191229	14	2019-12-30 00:00:03	10.65	18751	1.89	0.18	1.41	22.7
-33.5	150.625	20191229	15	2019-12-30 01:00:03	10.5	17923.5	1.82	0.17	1.41	18.4
-33.5	150.625	20191229	16	2019-12-30 02:00:03	10.29	17619	1.78	0.17	1.41	17.5
-33.5	150.625	20191229	17	2019-12-30 03:00:03	10.06	17656.9	1.76	0.17	1.41	11
-33.5	150.625	20191229	18	2019-12-30 04:00:03	9.76	17754	1.74	0.17	1.41	8.4
-33.5	150.625	20191229	19	2019-12-30 05:00:03	9.29	17703.4	1.69	0.17	1.4	7.9
-33.5	150.625	20191229	20	2019-12-30 06:00:03	8.58	17360.1	1.63	0.16	1.4	5.8
-33.5	150.625	20191229	21	2019-12-30 07:00:03	5.71	16631	1.55	0.15	1.4	5.5
-33.5	150.625	20191229	22	2019-12-30 08:00:03	4.48	15779.4	1.45	0.15	1.4	7.5
-33.5	150.625	20191229	23	2019-12-30 09:00:03	4.05	15168.1	1.38	0.14	1.4	12.2
-33.5	150.625	20191230	0	2019-12-30 10:00:03	3.46	17990.9	1.61	0.17	1.4	21.4
-33.5	150.625	20191230	1	2019-12-30 11:00:03	5.47	21277	1.89	0.2	1.4	96.2
-33.5	150.625	20191230	2	2019-12-30 12:00:03	8.01	26679.6	2.33	0.25	1.4	178.9
-33.5	150.625	20191230	3	2019-12-30 13:00:03	5.32	22157	2	0.21	1.41	155.3
-33.5	150.625	20191230	4	2019-12-30 14:00:03	7.19	27155.5	2.43	0.25	1.41	135.2
-33.5	150.625	20191230	5	2019-12-30 15:00:03	9.12	32638.9	2.9	0.31	1.41	120.7
-33.5	150.625	20191230	6	2019-12-30 16:00:03	12	38167.8	3.36	0.36	1.4	117.4
-33.5	150.625	20191230	7	2019-12-30 17:00:03	14.23	42638.9	3.77	0.4	1.4	76.8
-33.5	150.625	20191230	8	2019-12-30 18:00:03	14.66	44694.7	4.02	0.42	1.4	46.5
-33.5	150.625	20191230	9	2019-12-30 19:00:03	14.39	43218.3	3.95	0.4	1.4	61.1
-33.5	150.625	20191230	10	2019-12-30 20:00:03	14.89	39552.3	3.67	0.37	1.41	88
-33.5	150.625	20191230	11	2019-12-30 21:00:03	17.33	35007	3.28	0.33	1.41	93
-33.5	150.625	20191230	12	2019-12-30 22:00:03	21.26	30298	2.82	0.28	1.4	87.5
-33.5	150.625	20191230	13	2019-12-30 23:00:03	25.14	25864.8	2.39	0.24	1.4	75.5
-33.5	150.625	20191230	14	2019-12-31 00:00:03	27.37	21744.8	2	0.2	1.4	67.9
-33.5	150.625	20191230	15	2019-12-31 01:00:03	26.73	18250.6	1.67	0.17	1.4	63.8
-33.5	150.625	20191230	16	2019-12-31 02:00:03	23.17	15612.5	1.42	0.15	1.4	59
-33.5	150.625	20191230	17	2019-12-31 03:00:03	18.04	13626	1.24	0.13	1.4	60.5
-33.5	150.625	20191230	18	2019-12-31 04:00:03	13.34	11930.7	1.09	0.11	1.4	64.2
-33.5	150.625	20191230	19	2019-12-31 05:00:03	9.67	10403.3	0.96	0.1	1.4	64.7
-33.5	150.625	20191230	20	2019-12-31 06:00:03	7.09	9207.85	0.85	0.09	1.4	75.1
-33.5	150.625	20191230	21	2019-12-31 07:00:03	4.63	8450.91	0.77	0.08	1.4	105.7
-33.5	150.625	20191230	22	2019-12-31 08:00:03	1.96	8096.6	0.73	0.08	1.4	127.5
-33.5	150.625	20191230	23	2019-12-31 09:00:03	1.47	8197.41	0.71	0.08	1.4	122.6
-33.5	150.625	20191231	0	2019-12-31 10:00:03	2.6	10667.8	0.88	0.1	1.4	103.9
-33.5	150.625	20191231	1	2019-12-31 11:00:03	4.49	13261.2	1.05	0.12	1.4	74.9
-33.5	150.625	20191231	2	2019-12-31 12:00:03	6.35	17496.9	1.37	0.16	1.4	48.5
-33.5	150.625	20191231	3	2019-12-31 13:00:03	5.5	18145.3	1.47	0.17	1.4	41.1
-33.5	150.625	20191231	4	2019-12-31 14:00:03	6.61	22698.1	1.9	0.21	1.4	29.4
-33.5	150.625	20191231	5	2019-12-31 15:00:03	6.89	24501.9	2.14	0.23	1.41	19.1
-33.5	150.625	20191231	6	2019-12-31 16:00:03	2.19	9657.52	1.01	0.09	1.41	16.2
-33.5	150.625	20191231	7	2019-12-31 17:00:03	2.26	8860.94	1.01	0.09	1.42	10.7
-33.5	150.625	20191231	8	2019-12-31 18:00:03	2.35	7505.16	0.8	0.07	1.42	15.7
-33.5	150.625	20191231	9	2019-12-31 19:00:03	2.53	6026.38	0.59	0.06	1.41
-33.5	150.625	20191231	10	2019-12-31 20:00:03	2.66	5325.17	0.53	0.05	1.41
-33.5	150.625	20191231	11	2019-12-31 21:00:03	2.85	5714.05	0.61	0.05	1.41	30.3
-33.5	150.625	20191231	12	2019-12-31 22:00:03	3.01	6540.58	0.84	0.06	1.42	29.3
-33.5	150.625	20191231	13	2019-12-31 23:00:03	2.79	6556.87	0.96	0.06	1.43	28.4
-33.5	150.625	20191231	14	2020-01-01 00:00:03	1.96	5843.11	0.85	0.06	1.43	16.8
-33.5	150.625	20191231	15	2020-01-01 01:00:03	1.35	5166.83	0.84	0.05	1.43	18.1
-33.5	150.625	20191231	16	2020-01-01 02:00:03	1	4653.25	0.71	0.05	1.43	9.9
-33.5	150.625	20191231	17	2020-01-01 03:00:03	0.85	4061.36	0.58	0.04	1.42	11.2
-33.5	150.625	20191231	18	2020-01-01 04:00:03	0.81	3499.95	0.52	0.03	1.42	12
-33.5	150.625	20191231	19	2020-01-01 05:00:03	0.79	3192.72	0.47	0.03	1.42	11.6
-33.5	150.625	20191231	20	2020-01-01 06:00:03	0.77	3166.75	0.43	0.03	1.42	17.4
-33.5	150.625	20191231	21	2020-01-01 07:00:03	0.8	3182.61	0.41	0.03	1.42	15.9
-33.5	150.625	20191231	22	2020-01-01 08:00:03	0.93	3198.99	0.4	0.03	1.43	21
-33.5	150.625	20191231	23	2020-01-01 09:00:03	1.4	3623.67	0.44	0.04	1.43	27.3
										27.5
										21.3
										23.6
										24.8
										25.2
										38.8
										43.6
										31
										18
										10.9
										7
										10.7
										18.8
										24.6
										31.7
										30.1
										23.3
										27.9
										23.2
										30.6
										37.1
										41.8
										44
										42.9
										43.4
										44.5
										48.4
										51.5
										48.5
										35.1
										20.4
										17.4
										14.9
										14.3
										13.4
										12.7
										13.2
										12.9
										11.7
										15.2
										18.3
										16.9
										21.1
										21.7
										18.9
										24.3
										24.6
										21.7
										25
										22.1
										20.2
										16.2
										21.2
										22.1
										22.2
										18.1
										19.3
										30.1
										27.1
										18.1
										16.5
										13.6
										11.5
										13.1
										13
										10.9
										9.6
										15
										14.9
										7.3
										8
										7.9
										18.1
										37.6
										49
										47.9
										25
										14.8
										11.8
										13.7
										13.9
										16.8
										33.3
										38.6
										75.8
										65.7
										61.4
										110.7
										224.7
										300.6
										331.6
										95.1
										-3.8
										4
										24.1
										74.1
										131.5
										103.4
										83.6
										66.6
										38.4
										21
										11.3
										13.6
										15
										13.6
										20.1
										15.5
										13
										12.7
										10
										8.8
										8.7
										9.5
										11.5
										10.4
										13.2
										9.1
										-1.5
										-2.8
										7.7
										10.9
										12.8
										10.9
										11.4
										11.3
										3.3
										4.9
										5.3
										8.6
										6.6
										5.9
										4.9
										3.3
										-2.3
										0.4
										5.7
										7.6
										4
										1.7
										5
										11.3
										18.9
										15.8
										9.4
										12
										15.8
										16.1
										14.7
										18.4
										27.7
										32.5
										24
										27.1
										24.5
										22.6
										22.6
										18.5
										20.2
										24.9
										23.4
										24.1
										36.1
										44
										52.6
										65.8
										78.3
										79.1
										69.7
										73.8
										80.3
										90.2
										95
										100.9
										101.3
										71.7
										57.7
										51
										52.2
										56.4
										68.3
										74.2
										80.3
										75.9
										62.5
										40.3
										23.5
										13.8
										7.3
										1.6
										1.3
										2.8
										3.4
										1.4
										3.1
										3.6
										4.7
										3
										3.2
										4.5
										3.7
										2.5
										2.7
										2.9
										0.7
										3.3
										12.1
										16.9
										9.6
										7.1
										7.5
										3.6
										10.8
										8.7
										12.7
										20.5
										24
										29.3
										11.7
										13
										16.6
										20.5
										25.3
										20.9
										21.7
										18.6
										22.4
										32
										48.2
										68.7
										156.3
										187.8
										160.9
										75.7
										30.6
										26
										19
										23.2
										26.7
										22.9
										24.8
										38.6
										43.6
										37.7
										35.3
										29.3
										26.8
										25.3
										22.7
										17.9
										13.6
										12.6
										20
										19.5
										19.2
										18.2
										26.3
										37.2
										35.6
										33.4
										48.5
										73
										90.7
										82.9
										64.3
										48.3
										46.3
										55
										54.5
										60.7
										63.5
										57.9
										51
										43.2
										37.3
										32.6
										31.6
										34.2
										36.9
										47.5
										56.8
										61.4
										53.3
										42.7
										33.7
										30.3
										25.2
										12.3
										8.7
										11.8
										9.1
										5.6
										1.7
										11
										10.7
										3.8
										6.5
										3.9
										3
										1.7
										4.9
										4.5
										2.2
										-2.1
										-2.3
										1.3
										7.2
										10.7
										14.2
										17.8
										27.2
										20.2
										14.9
										14.6
										16.3
										19
										11.9
										5.9
										3.5
										1.3
										5.6
										4.9
										2.5
										1.8
										3.4
										5.9
										8.1
										0.2
										-9.4
										-1.8
										-0.2
										4.6
										6.5
										3.1
										7.3
										14.4
										15.6
										8
										2.9
										1.1
										3.2
										11.4
										10.2
										5.9
										4.5
										6.2
										3.8
										4.5
										3.8
										10.8
										15.6
										23.4
										25
										26.9
										24.9
										25
										23
										17.7
										16.5
										16.8
										16.5
										12
										11.8
										19.1
										13.2
										4.8
										3.4
										6.6
										7.5
										10.2
										6
										6.5
										10.6
										16.2
										20.8
										15.7
										9.7
										10.6
										7.6
										13.8
										23.2
										23.6
										31.3
										36.9
										44.1
										41.7
										37.2
										38.4
										37.5
										29.8
										35
										40
										45.8
										39
										27.5
										18.3
										13.1
										14.5
										17.1
										19.9
										18.1
										12.7
										7.2
										10
										6.8
										2.1
										3.4
										8.4
										13.8
										15
										18.8
										15.3
										11.8
										17.6
										18.9
										13.7
										10.6
										13.9
										12.7
										13.1
										9.2
										9.3
										11.4
										8.7
										6.3
										5
										7.1
										7.3
										5
										2
										5.5
										4.6
										6.1
										4.1
										3.6
										4.1
										5
										2.7
										2.7
										4.3
										6.5
										0.8
										4
										6.6
										4.3
										5.8
										5.6
										3.8
										0.7
										1.3
										5.6
										6.6
										6.9
										9.7
										9.8
										8.9
										7.9
										10.6
										16.1
										12.5
										14.4
										10.8
										14
										11.5
										9.7
										8
										8.6
										8.4
										11.1
										11.1
										10.7
										6.5
										7.2
										15.2
										20.1
										15.4
										13.2
										13.7
										8.8
										6.7
										-4.9
										-3.2
										-0.4
										-6
										-4.5
										1.8
										3.7
										2.7
										6.3
										2
										2.1
										3.6
										7
										7.9
										1.5
										-1.2
										-0.2
										1.3
										2.7
										7.4
										13.8
										23.7
										-8.3
										5.6
										13.2
										22.6
										14.6
										7.5
										6.9
										8.8
										9.4
										10.9
										7.9
										6.9
										11.7
										10.4
										4.4
										1.4
										10.5
										20.3
										20.7
										22.2
										22.3
										19.7
										25.7
										43.9
										58.7
										68.4
										97.4
										104.2
										21.3
										24.6
										21.4
										12.4
										17.2
										20.4
										29.1
										44.4
										56.8
										47.7
										34
										36.7
										40.7
										36.6
										36.1
										38.3
										39.6
										44.4
										47.9
										37.1
										21.9
										17
										18.2
										17
										13.8
										12.3
										10.8
										9.8
										5.7
										10
										11.3
										11.3
										13
										9.1
										11.3
										15.1
										16.4
										18
										16.2
										15.3
										15.7
										11.7
										7.9
										5.9
										6
										16.6
										16.9
										10.4
										6.8
										7.8
										6.9
										0.6
										6.7
										14.6
										9.6
										5.6
										5.1
										5.7
										10.9
										13.2
										14.2
										12.8
										11.6
										8.2
										7.9
										6.7
										17.3
										13
										12.8
										17
										15
										8
										6.2
										5.6
										21.7
										42.2
										47.6
										37.3
										33.3
										31.7
										27.8
										23.5
										21.8
										19.8
										19.3
										16.1
										21.6
										17.1
										16.7
										16.4
										14.4
										14
										13.8
										22.3
										19.2
										15.8
										14.4
										15.6
										10.2
										9.4
										8.1
										10.8
										11.3
										8
										9.9
										10.2
										14.9
										16.1
										15.2
										19.7
										14.7
										16.2
										15.9
										14.4
										15.9
										19.2
										20.1
										8.9
										9.1
										17.1
										11.6
										8.5
										6.4
										8.8
										6.3
										-2.5
										1.4
										11.2
										21.5
										30.3
										28.6
										27.7
										29.2
										27.8
										26.2
										21.6
										22.1
										21.3
										26.4
										25.2
										20.6
										18.9
										17.3
										14
										11.2
										12.5
										13.8
										11.1
										11.3
										10.8
										11.3
										8.7
										0.9
										8.4
										13.8
										15.8
										15.1
										12
										16.5
										22.8
										24.6
										19
										17.1
										14.2
										13.5
										17.2
										19.1
										12.7
										11.6
										11.9
										11.6
										7.9
										8.1
										3.7
										2.6
										5
										8.5
										14.4
										15.3
										16
										11.8
										14.1
										19.7
										16.9
										14.9
										17
										14.8
										14.2
										14.2
										10
										13
										11.1
										8.6
